# Supplementary material for: Fatty Liver Due to Increased de novo Lipogenesis: Alterations in the Hepatic Peroxisomal Proteome
Source: Front Cell Dev Biol. 2019 Oct 25;7:248. doi: 10.3389/fcell.2019.00248 (PMC6823594; doi:10.3389/fcell.2019.00248)
Supplement: Supplementary file 3 [file Table_2.xlsx]

## Sheet: Caption
Supplement Table 2 Accompanying data to Figure 2: Disease and function analyses related to lipid metabolism. IPATM Core expression analyses of transcripts with 1.4- fold differential abundance in C57Bl6 vs. alb-SREBP-1a mice.

## Sheet: Lipid Metabolism
Categories	Diseases or Functions Annotation	# Molecules	p-value	Predicted Activation State	Activation z-score	Molecules
Lipid Metabolism,Nucleic Acid Metabolism,Small Molecule Biochemistry	Conversion of 3-hydroxy-3-methylglutaryl-coenzyme A	1	0.0214			HMGCR
Lipid Metabolism,Small Molecule Biochemistry	Elongation of fatty acid	2	0.0183			ABCD2,HACD2
Lipid Metabolism,Small Molecule Biochemistry	Incorporation of monounsaturated fatty acids	3	0.00441			ACLY,CAV1,CD36
Lipid Metabolism,Nucleic Acid Metabolism,Small Molecule Biochemistry	Conversion of acetyl-coenzyme A	2	0.00437			ACLY,ACSS2
Lipid Metabolism,Small Molecule Biochemistry	Conversion of fatty acid	5	0.00319		-1,342	ACLY,ACSS2,CYP2B6,Cyp4a14,HMGCR
Lipid Metabolism,Small Molecule Biochemistry	Hydroxylation of lipid	4	0.00212		-1,021	CYP2B6,CYP4A11,Cyp4a14,CYP7B1
Lipid Metabolism,Nucleic Acid Metabolism,Small Molecule Biochemistry	Conversion of acyl-coenzyme A	3	0.00185			ACLY,ACSS2,HMGCR
Energy Production,Lipid Metabolism,Small Molecule Biochemistry	Oxidation of fatty acid	12	0.00171		-1,224	ABCD2,ACOT11,ADH4,BDH2,CD36,CYP4A11,Cyp4a14,EHHADH,MYC,OBP2B,RBP1,UCP2
Energy Production,Lipid Metabolism,Small Molecule Biochemistry	Oxidation of lipid	16	0.000166		-1,772	ABCD2,ACOT11,ADH4,BDH2,CD36,CYP2B6,CYP4A11,Cyp4a14,EHHADH,FOXO3,HSD17B6,MYC,OBP2B,RBP1,RDH16,UCP2
Lipid Metabolism,Small Molecule Biochemistry	Incorporation of palmitic acid	4	8.89e-05		-0,832	ACLY,CAV1,CD36,MYC
Lipid Metabolism,Small Molecule Biochemistry	Conversion of lipid	13	7.21e-05		-0,687	ACLY,ACSS2,ADH4,ANGPTL4,C3AR1,CYP2B6,CYP4A11,Cyp4a14,HMGCR,HSD17B6,Hsd3b4 (includes others),Mt2,RDH16
Lipid Metabolism,Small Molecule Biochemistry	Fatty acid metabolism	26	0.019		-0,622	ABCC3,ABCD2,ACLY,Acot1,ACOT11,ACOT4,ACSS2,APOA5,APOM,CAV1,CD36,CD74,CYP4A11,Cyp4a14,EHHADH,FOXO3,HACD2,INSIG1,MGST3,MSMO1,MYC,NQO1,PITPNA,PTCH1,SAA1,SDHB
Lipid Metabolism,Small Molecule Biochemistry	Metabolism of long chain fatty acid	4	0.00245			Acot1,ACOT4,CD36,CYP4A11
Lipid Metabolism,Nucleic Acid Metabolism,Small Molecule Biochemistry	Metabolism of acyl-coenzyme A	5	0.00238			ACLY,Acot1,ACOT11,ACOT4,EHHADH
Lipid Metabolism,Small Molecule Biochemistry,Vitamin and Mineral Metabolism	Metabolism of cholesterol	11	0.0002		1,980	ACLY,CAV1,CYP51A1,CYP7B1,FDFT1,HMGCR,IDI1,INSIG1,MSMO1,MVD,SAA1
Lipid Metabolism,Small Molecule Biochemistry,Vitamin and Mineral Metabolism	Metabolism of sterol	12	0.000113	Increased	2,216	ACLY,CAV1,CXCL10,CYP51A1,CYP7B1,FDFT1,HMGCR,IDI1,INSIG1,MSMO1,MVD,SAA1
Lipid Metabolism,Small Molecule Biochemistry,Vitamin and Mineral Metabolism	Steroid metabolism	20	1.89e-05		1,551	ACLY,CAV1,CXCL10,CYP2B6,CYP51A1,CYP7B1,FDFT1,HMGCR,Hsd3b4 (includes others),IDI1,INHBA,INSIG1,MSMO1,MVD,PRLR,RDH16,RORC,SAA1,SULT1E1,UGT2B28
Lipid Metabolism,Small Molecule Biochemistry,Vitamin and Mineral Metabolism	Metabolism of terpenoid	26	4.89e-07		0,368	ACLY,ADH4,APOM,BCO2,CAV1,CXCL10,CYP2B6,CYP51A1,CYP7B1,DPAGT1,FDFT1,HMGCR,Hsd3b4 (includes others),IDI1,INHBA,INSIG1,MSMO1,MVD,PRLR,RBP1,RDH16,RETSAT,RORC,SAA1,SULT1E1,UGT2B28
Lipid Metabolism,Molecular Transport,Small Molecule Biochemistry	Accumulation of fatty acid	4	0.0154			ABCD2,CD36,PITPNA,SDHB
Lipid Metabolism,Small Molecule Biochemistry	Storage of lipid	6	0.0127		-1,067	CAV1,CD36,CRY1,EIF4EBP2,MGAT2,RBP1
Lipid Metabolism,Small Molecule Biochemistry	Translocation of fatty acid	2	0.00646			CAV1,CD36
Lipid Metabolism,Molecular Transport,Small Molecule Biochemistry	Localization of lysophospholipids	2	0.000456			CAV1,RAB22A
Lipid Metabolism,Molecular Transport,Small Molecule Biochemistry	Concentration of bile salt	3	0.0157			ABCC3,EHHADH,mir-122
Lipid Metabolism,Molecular Transport,Small Molecule Biochemistry	Accumulation of cholesterol ester	3	0.011			INSIG1,PITPNA,SULT1E1
Lipid Metabolism,Small Molecule Biochemistry,Vitamin and Mineral Metabolism	Homeostasis of cholesterol	7	0.00983			APOA5,CAV1,CD36,CYP7B1,HMGCR,INSIG1,SAA1
Lipid Metabolism,Molecular Transport,Nucleic Acid Metabolism,Small Molecule Biochemistry	Concentration of acetyl-coenzyme A	2	0.00646			ACLY,MYC
Lipid Metabolism,Small Molecule Biochemistry	Reduction of lipid	4	0.0032			ADH4,Gsta4,HMGCR,Hsd3b4 (includes others)
Lipid Metabolism,Molecular Transport,Small Molecule Biochemistry	Accumulation of farnesyl pyrophosphate	2	0.000456			FDFT1,HMGCR
Lipid Metabolism,Molecular Transport,Small Molecule Biochemistry	Concentration of triacylglycerol	21	0.000369		-1,163	ACLY,ACOT11,ANGPTL4,APOA5,APOM,BCO2,CACFD1,CAV1,CD36,FOXO3,GPD2,INSIG1,LCN2,mir-122,MYC,NQO1,PITPNA,PPP1R3C,SERPINA12,SPP1,UCP2
Lipid Metabolism,Molecular Transport,Small Molecule Biochemistry	Concentration of cholesterol	20	0.000251		-0,614	ACOT11,ANGPTL4,Anp32b,APOA5,APOM,BCO2,CACFD1,CAV1,CD36,DIO1,FDFT1,FOXO3,GPD2,HMGCR,INSIG1,LCN2,mir-122,SAA1,SERPINA12,SPP1
Lipid Metabolism,Small Molecule Biochemistry	Homeostasis of lipid	15	0.000178			ABCC3,ANGPTL4,APOA5,CAV1,CD36,Cyp4a14,CYP7B1,EHHADH,GOT1,HMGCR,INSIG1,Mt2,NR1D2,RBP1,SAA1
Lipid Metabolism,Molecular Transport,Small Molecule Biochemistry	Concentration of lipid	45	9.06e-05		0,049	ABCC3,ABCD2,ACLY,ACOT11,ANGPTL4,Anp32b,APOA5,APOM,BCO2,CACFD1,CAV1,CD36,CD59,CRY1,CYP4A11,DIO1,EHHADH,EXTL1,F2R,FDFT1,FOXO3,GPD2,HMGCR,HSPA5,INHBA,INSIG1,LCN2,LGR5,mir-122,MYC,NQO1,NRBF2,PITPNA,PLPP2,PPP1R3C,PRLR,RBP1,RDH16,SAA1,SERPINA12,SLC34A2,SPP1,SULT1E1,UCP2,ZBTB16
Lipid Metabolism,Molecular Transport,Small Molecule Biochemistry	Quantity of steroid	30	4.22e-05		-0,309	ABCC3,ACOT11,ANGPTL4,Anp32b,APOA5,APOM,BCO2,CACFD1,CAV1,CD36,CRY1,DIO1,EHHADH,FDFT1,FOXO3,GPD2,HMGCR,INHBA,INSIG1,LCN2,LGR5,mir-122,PITPNA,PRLR,SAA1,SERPINA12,SLC34A2,SPP1,SULT1E1,ZBTB16
Lipid Metabolism,Nucleic Acid Metabolism,Small Molecule Biochemistry	Synthesis of acetyl-coenzyme A	3	0.00236			ACLY,ACSS2,MYC
Lipid Metabolism,Small Molecule Biochemistry,Vitamin and Mineral Metabolism	Synthesis of steroid	17	0.00141		0,975	ACLY,CAV1,CRY1,CXCL10,CYP51A1,CYP7B1,FDFT1,HMGCR,Hsd3b4 (includes others),IDI1,INHBA,INSIG1,MSMO1,MVD,PRLR,PROX1,SULT1E1
Lipid Metabolism,Small Molecule Biochemistry,Vitamin and Mineral Metabolism	Synthesis of cholesterol	9	0.000154			ACLY,CAV1,CYP51A1,FDFT1,HMGCR,IDI1,INSIG1,MSMO1,MVD
Lipid Metabolism,Small Molecule Biochemistry,Vitamin and Mineral Metabolism	Synthesis of sterol	10	0.000115		1,013	ACLY,CAV1,CYP51A1,CYP7B1,FDFT1,HMGCR,IDI1,INSIG1,MSMO1,MVD
Lipid Metabolism,Small Molecule Biochemistry	Synthesis of lipid	44	7.91e-05		0,032	ACLY,ACSS2,ADH4,ALG12,ALG2,ALG3,APOA5,APOM,ARF3,CAV1,CD36,CD74,CRY1,CXCL10,CYP4A11,Cyp4a14,CYP51A1,CYP7B1,DPAGT1,ETNPPL,F2R,FDFT1,FOXO3,HACD2,HMGCR,HSD17B13,Hsd3b4 (includes others),HSPA5,IDI1,INHBA,INSIG1,MGAT2,MGST3,MSMO1,MTMR9,MVD,MYC,OBP2B,PLPP2,PRLR,PROX1,RBP1,RDH16,SULT1E1
