# Supplementary material for: Fatty Liver Due to Increased de novo Lipogenesis: Alterations in the Hepatic Peroxisomal Proteome
Source: Front Cell Dev Biol. 2019 Oct 25;7:248. doi: 10.3389/fcell.2019.00248 (PMC6823594; doi:10.3389/fcell.2019.00248)
Supplement: Supplementary file 6 [file Table_5.xlsx]

## Sheet: Caption
Supplemental Table 5 Fold change analyses of all peroxisomal fraction proteins

## Sheet: mPexi_C57Bl6_alb-SREBP-1c_oF
Comparison (group1/group2)	UniProtIds	ProteinNames	Group	ProteinGroups	AVG Log2 Ratio	Absolute AVG Log2 Ratio	Qvalue	# of Ratios	# Unique Total Peptides	% Change	Ratio	fold change	Condition Numerator	Condition Denominator	ProteinDescriptions	Genes	GO Cellular Component	GO Molecular Function	GO Biological Process
C57Bl6 / alb-SREBP-1c	P97449	AMPN_MOUSE	P97449	P97449	-7.03972	7.03972	0.523045	2	6	-99.24	0.00760032	-131.573	C57Bl6	alb-SREBP-1c	Aminopeptidase N	Anpep	extracellular space,cytoplasm,endoplasmic reticulum-Golgi intermediate compartment,plasma membrane,external side of plasma membrane,integral component of membrane,extracellular exosome	zinc ion binding,peptide binding,metalloaminopeptidase activity	angiogenesis,proteolysis,signal transduction,cell-cell signaling,regulation of blood pressure,cell differentiation,peptide catabolic process
C57Bl6 / alb-SREBP-1c	Q9CR24	NUDT8_MOUSE	Q9CR24	Q9CR24	-4.37597	4.37597	0.379208	11	9	-95.1838	0.0481615	-20.7635	C57Bl6	alb-SREBP-1c	Nucleoside diphosphate-linked moiety X motif 8	Nudt8	mitochondrion	hydrolase activity,metal ion binding	biological_process
C57Bl6 / alb-SREBP-1c	Q8R4T9;Q8R4T9-3;Q8R4T9-4	UT2_MOUSE	Q8R4T9;Q8R4T9-3;Q8R4T9-4	Q8R4T9;Q8R4T9-3;Q8R4T9-4	-2.74943	2.74943	0.0464743	3	1	-85.1291	0.148709	-6.72453	C57Bl6	alb-SREBP-1c	Urea transporter 2;Isoform A3 of Urea transporter 2;Isoform A5 of Urea transporter 2	Slc14a2	integral component of membrane,apical plasma membrane;;	urea transmembrane transporter activity,cell adhesion molecule binding;;	urea transmembrane transport;;
C57Bl6 / alb-SREBP-1c	Q9NYQ2	HAOX2_MOUSE	Q9NYQ2	Q9NYQ2	-2.42573	2.42573	0.0675348	8	15	-81.3884	0.186116	-5.37301	C57Bl6	alb-SREBP-1c	Hydroxyacid oxidase 2	Hao2	mitochondrion,peroxisome	(S)-2-hydroxy-acid oxidase activity,receptor binding,FMN binding,very-long-chain-(S)-2-hydroxy-acid oxidase activity,long-chain-(S)-2-hydroxy-long-chain-acid oxidase activity,medium-chain-(S)-2-hydroxy-acid oxidase activity	fatty acid oxidation
C57Bl6 / alb-SREBP-1c	Q61941	NNTM_MOUSE	Q61941	Q61941	-2.40207	2.40207	0.164193	6	49	-81.0807	0.189193	-5.28561	C57Bl6	alb-SREBP-1c	NAD(P) transhydrogenase, mitochondrial	Nnt	mitochondrion,mitochondrial inner membrane,integral component of membrane	NAD(P)+ transhydrogenase (AB-specific) activity,NADP binding,NAD binding	NADPH regeneration,reactive oxygen species metabolic process,hydrogen ion transmembrane transport
C57Bl6 / alb-SREBP-1c	P62751	RL23A_MOUSE	P62751	P62751	-2.35466	2.35466	0.00164268	8	8	-80.4487	0.195513	-5.11474	C57Bl6	alb-SREBP-1c	60S ribosomal protein L23a	Rpl23a	nucleus,cytosolic large ribosomal subunit,TORC2 complex	RNA binding,structural constituent of ribosome,protein binding,rRNA binding	ribosomal large subunit assembly,translation,biological_process
C57Bl6 / alb-SREBP-1c	Q9EQU5	SET_MOUSE	Q9EQU5	Q9EQU5	-2.18007	2.18007	3.65042e-07	18	7	-77.9335	0.220665	-4.53175	C57Bl6	alb-SREBP-1c	Protein SET	Set	nucleus,nucleoplasm,cytoplasm,endoplasmic reticulum,lipid particle,cytosol,macromolecular complex,perinuclear region of cytoplasm	DNA binding	nucleosome assembly,negative regulation of neuron apoptotic process,negative regulation of transcription, DNA-templated
C57Bl6 / alb-SREBP-1c	P61255	RL26_MOUSE	P61255	P61255	-2.17961	2.17961	4.57457e-05	18	8	-77.9265	0.220735	-4.53032	C57Bl6	alb-SREBP-1c	60S ribosomal protein L26	Rpl26	nucleoplasm,nucleolus,cytoplasm,cytosolic large ribosomal subunit,cytosolic ribosome,ribonucleoprotein complex	RNA binding,structural constituent of ribosome,protein binding,mRNA 5'-UTR binding	cytoplasmic translation,rRNA processing,DNA damage response, signal transduction by p53 class mediator resulting in cell cycle arrest,cellular response to UV,ribosomal large subunit biogenesis,positive regulation of translation,cellular response to ionizing radiation,cellular response to gamma radiation,positive regulation of DNA damage response, signal transduction by p53 class mediator resultin…
C57Bl6 / alb-SREBP-1c	Q9CR57	RL14_MOUSE	Q9CR57	Q9CR57	-2.10175	2.10175	0.00971273	11	6	-76.7025	0.232975	-4.29231	C57Bl6	alb-SREBP-1c	60S ribosomal protein L14	Rpl14	cytosolic large ribosomal subunit	RNA binding,structural constituent of ribosome,cadherin binding	rRNA processing,translation,ribosomal large subunit biogenesis
C57Bl6 / alb-SREBP-1c	P62830	RL23_MOUSE	P62830	P62830	-2.09115	2.09115	0.0134602	13	7	-76.5307	0.234693	-4.26089	C57Bl6	alb-SREBP-1c	60S ribosomal protein L23	Rpl23	nucleoplasm,nucleolus,cytoplasm,cytosolic large ribosomal subunit,cytosolic ribosome,macromolecular complex	transcription coactivator binding,structural constituent of ribosome,protein binding,ubiquitin protein ligase binding,large ribosomal subunit rRNA binding,ubiquitin ligase inhibitor activity	negative regulation of transcription from RNA polymerase II promoter,translation,positive regulation of cell proliferation,positive regulation of gene expression,protein-DNA complex disassembly,positive regulation of transcription from RNA polymerase II promoter,protein stabilization,negative regulation of cell cycle arrest,positive regulation of cell cycle arrest,cellular response to actinomycin…
C57Bl6 / alb-SREBP-1c	Q8VCB3	GYS2_MOUSE	Q8VCB3	Q8VCB3	-2.00378	2.00378	1.40294e-07	36	22	-75.0654	0.249346	-4.01049	C57Bl6	alb-SREBP-1c	Glycogen [starch] synthase, liver	Gys2	cytoplasm,cytosol,cytoskeleton,cell cortex,cortical actin cytoskeleton,ectoplasm	glycogen (starch) synthase activity	glycogen biosynthetic process,response to glucose
C57Bl6 / alb-SREBP-1c	P62960	YBOX1_MOUSE	P62960	P62960	-2.00096	2.00096	0.365535	2	2	-75.0166	0.249834	-4.00266	C57Bl6	alb-SREBP-1c	Nuclease-sensitive element-binding protein 1	Ybx1	extracellular region,nucleus,U12-type spliceosomal complex,cytoplasm,cytosol,cytoplasmic stress granule,nuclear membrane,intracellular membrane-bounded organelle,CRD-mediated mRNA stability complex,histone pre-mRNA 3'end processing complex,ribonucleoprotein complex	RNA polymerase II core promoter proximal region sequence-specific DNA binding,transcriptional activator activity, RNA polymerase II core promoter proximal region sequence-specific binding,DNA binding,chromatin binding,single-stranded DNA binding,RNA binding,protein binding,GTPase binding	negative regulation of transcription from RNA polymerase II promoter,in utero embryonic development,regulation of transcription, DNA-templated,transcription from RNA polymerase II promoter,mRNA processing,RNA splicing,positive regulation of transcription from RNA polymerase II promoter,negative regulation of striated muscle cell differentiation,positive regulation of cell division,CRD-mediated mR…
C57Bl6 / alb-SREBP-1c	P62754	RS6_MOUSE	P62754	P62754	-1.99527	1.99527	0.193339	6	12	-74.9178	0.250822	-3.9869	C57Bl6	alb-SREBP-1c	40S ribosomal protein S6	Rps6	nucleus,nucleolus,cytoplasm,endoplasmic reticulum,cytosol,ribosome,polysome,small ribosomal subunit,cytosolic small ribosomal subunit,dendrite,cytoplasmic ribonucleoprotein granule,cell body,perinuclear region of cytoplasm	structural constituent of ribosome,protein binding,protein kinase binding	G1/S transition of mitotic cell cycle,mitotic cell cycle,placenta development,T cell proliferation involved in immune response,rRNA processing,translation,activation-induced cell death of T cells,mitotic cell cycle checkpoint,gastrulation,oogenesis stage,TOR signaling,T cell differentiation in thymus,ribosomal small subunit biogenesis,glucose homeostasis,positive regulation of apoptotic process,n…
C57Bl6 / alb-SREBP-1c	P01878	IGHA_MOUSE	P01878	P01878	-1.88096	1.88096	0.0644371	5	2	-72.8498	0.271502	-3.68321	C57Bl6	alb-SREBP-1c	Ig alpha chain C region	NaN		antigen binding,immunoglobulin receptor binding
C57Bl6 / alb-SREBP-1c	Q6ZWV7	RL35_MOUSE	Q6ZWV7	Q6ZWV7	-1.86563	1.86563	0.24342	3	2	-72.5597	0.274403	-3.64428	C57Bl6	alb-SREBP-1c	60S ribosomal protein L35	Rpl35	cytosolic large ribosomal subunit	mRNA binding,structural constituent of ribosome	maturation of LSU-rRNA from tricistronic rRNA transcript (SSU-rRNA, 5.8S rRNA, LSU-rRNA),translation
C57Bl6 / alb-SREBP-1c	Q8K019;Q8K019-2;Q8K019-3	BCLF1_MOUSE	Q8K019;Q8K019-2;Q8K019-3	Q8K019;Q8K019-2;Q8K019-3	-1.82667	1.82667	0.520228	3	1	-71.8086	0.281914	-3.54718	C57Bl6	alb-SREBP-1c	Bcl-2-associated transcription factor 1;Isoform 2 of Bcl-2-associated transcription factor 1;Isoform 3 of Bcl-2-associated transcription factor 1	Bclaf1	nucleus,nucleoplasm,cytoplasm,nuclear speck;;	DNA binding,protein binding;;	transcription, DNA-templated,apoptotic process,positive regulation of apoptotic process,regulation of DNA-templated transcription in response to stress,negative regulation of transcription, DNA-templated,cellular response to leukemia inhibitory factor,positive regulation of DNA-templated transcription, initiation,positive regulation of response to DNA damage stimulus,positive regulation of intrin…
C57Bl6 / alb-SREBP-1c	P10404;P11370	ENV1_MOUSE;ENV2_MOUSE	P10404;P11370	P10404;P11370	-1.79664	1.79664	0.315159	2	1	-71.2157	0.287843	-3.47411	C57Bl6	alb-SREBP-1c	MLV-related proviral Env polyprotein;Retrovirus-related Env polyprotein from Fv-4 locus	;Fv4	plasma membrane,integral component of membrane;	metal ion binding;	;
C57Bl6 / alb-SREBP-1c	Q3U4I7	PYRD2_MOUSE	Q3U4I7	Q3U4I7	-1.79324	1.79324	0.421397	2	5	-71.1477	0.288523	-3.46593	C57Bl6	alb-SREBP-1c	Pyridine nucleotide-disulfide oxidoreductase domain-containing protein 2	Pyroxd2	intracellular	oxidoreductase activity	oxidation-reduction process
C57Bl6 / alb-SREBP-1c	P62242	RS8_MOUSE	P62242	P62242	-1.78525	1.78525	0.000486535	15	12	-70.9875	0.290125	-3.44679	C57Bl6	alb-SREBP-1c	40S ribosomal protein S8	Rps8	endoplasmic reticulum,cytosol,membrane,cytosolic small ribosomal subunit,ribonucleoprotein complex	structural constituent of ribosome	maturation of SSU-rRNA from tricistronic rRNA transcript (SSU-rRNA, 5.8S rRNA, LSU-rRNA),translation
C57Bl6 / alb-SREBP-1c	P62900	RL31_MOUSE	P62900	P62900	-1.7639	1.7639	0.00818929	7	6	-70.5548	0.294452	-3.39614	C57Bl6	alb-SREBP-1c	60S ribosomal protein L31	Rpl31	cytosolic large ribosomal subunit,polysomal ribosome	structural constituent of ribosome,protein binding	cytoplasmic translation
C57Bl6 / alb-SREBP-1c	Q9R257	HEBP1_MOUSE	Q9R257	Q9R257	-1.72957	1.72957	1.01799e-14	24	12	-69.8459	0.301541	-3.3163	C57Bl6	alb-SREBP-1c	Heme-binding protein 1	Hebp1	cytoplasm,mitochondrion,cytosol	heme binding	heme metabolic process
C57Bl6 / alb-SREBP-1c	P61514	RL37A_MOUSE	P61514	P61514	-1.67097	1.67097	0.00033004	8	5	-68.5959	0.314041	-3.1843	C57Bl6	alb-SREBP-1c	60S ribosomal protein L37a	Rpl37a	ribosome	structural constituent of ribosome,metal ion binding	translation
C57Bl6 / alb-SREBP-1c	P61358	RL27_MOUSE	P61358	P61358	-1.61974	1.61974	0.000302683	25	8	-67.4606	0.325394	-3.0732	C57Bl6	alb-SREBP-1c	60S ribosomal protein L27	Rpl27	large ribosomal subunit,cytosolic large ribosomal subunit,cytoplasmic side of rough endoplasmic reticulum membrane	structural constituent of ribosome	rRNA processing,translation
C57Bl6 / alb-SREBP-1c	P47962	RL5_MOUSE	P47962	P47962	-1.59701	1.59701	8.26659e-05	39	14	-66.944	0.33056	-3.02517	C57Bl6	alb-SREBP-1c	60S ribosomal protein L5	Rpl5	nucleus,nucleoplasm,nucleolus,cytoplasm,endoplasmic reticulum,cytosol,aminoacyl-tRNA synthetase multienzyme complex,cytosolic large ribosomal subunit,macromolecular complex	mRNA 3'-UTR binding,structural constituent of ribosome,protein binding,5S rRNA binding,ubiquitin protein ligase binding,mRNA 5'-UTR binding,ubiquitin ligase inhibitor activity	ribosomal large subunit assembly,rRNA processing,translation,positive regulation of gene expression,positive regulation of phosphatase activity,ribosomal large subunit biogenesis,positive regulation of translation,protein stabilization,cellular response to inorganic substance,regulation of signal transduction by p53 class mediator,negative regulation of ubiquitin protein ligase activity,positive …
C57Bl6 / alb-SREBP-1c	P62267	RS23_MOUSE	P62267	P62267	-1.59387	1.59387	0.109837	6	5	-66.8719	0.331281	-3.01859	C57Bl6	alb-SREBP-1c	40S ribosomal protein S23	Rps23	endoplasmic reticulum,rough endoplasmic reticulum,cytosol,cytosolic small ribosomal subunit,polysomal ribosome	structural constituent of ribosome	cytoplasmic translation,translation,stress granule assembly,maintenance of translational fidelity
C57Bl6 / alb-SREBP-1c	P62806	H4_MOUSE	P62806	P62806	-1.52474	1.52474	0.000370155	22	7	-65.2458	0.347542	-2.87735	C57Bl6	alb-SREBP-1c	Histone H4	Hist1h4a	nuclear chromosome,nucleosome,nuclear nucleosome,nucleus,nucleoplasm,macromolecular complex	DNA binding,protein binding,protein domain specific binding,histone binding,protein heterodimerization activity	chromatin silencing at rDNA,nucleosome assembly,DNA replication-dependent nucleosome assembly,DNA replication-independent nucleosome assembly,DNA-templated transcription, initiation,negative regulation of megakaryocyte differentiation,protein heterotetramerization
C57Bl6 / alb-SREBP-1c	Q9CPR4	RL17_MOUSE	Q9CPR4	Q9CPR4	-1.50747	1.50747	1.29582e-05	13	10	-64.8273	0.351727	-2.84311	C57Bl6	alb-SREBP-1c	60S ribosomal protein L17	Rpl17	large ribosomal subunit	structural constituent of ribosome,protein binding	translation
C57Bl6 / alb-SREBP-1c	O08715;O08715-4;O08715-6	AKAP1_MOUSE	O08715;O08715-4;O08715-6	O08715;O08715-4;O08715-6	-1.50621	1.50621	0.00260983	6	6	-64.7966	0.352034	-2.84063	C57Bl6	alb-SREBP-1c	A-kinase anchor protein 1, mitochondrial;Isoform 4 of A-kinase anchor protein 1, mitochondrial;Isoform 6 of A-kinase anchor protein 1, mitochondrial	Akap1	mitochondrion,mitochondrial outer membrane,endoplasmic reticulum,integral component of membrane;;	RNA binding,protein binding,protein kinase A regulatory subunit binding;;	regulation of protein kinase A signaling;;
C57Bl6 / alb-SREBP-1c	P62849;P62849-2;P62849-3	RS24_MOUSE	P62849;P62849-2;P62849-3	P62849;P62849-2;P62849-3	-1.49341	1.49341	0.0516365	2	5	-64.4828	0.355172	-2.81554	C57Bl6	alb-SREBP-1c	40S ribosomal protein S24;Isoform 2 of 40S ribosomal protein S24;Isoform 3 of 40S ribosomal protein S24	Rps24	small ribosomal subunit,cytosolic small ribosomal subunit;;	structural constituent of ribosome;;	maturation of SSU-rRNA from tricistronic rRNA transcript (SSU-rRNA, 5.8S rRNA, LSU-rRNA),rRNA processing,translation,erythrocyte homeostasis,ribosomal small subunit biogenesis;;
C57Bl6 / alb-SREBP-1c	P97461	RS5_MOUSE	P97461	P97461	-1.43691	1.43691	0.1077	3	7	-63.0642	0.369358	-2.7074	C57Bl6	alb-SREBP-1c	40S ribosomal protein S5	Rps5	cytosolic small ribosomal subunit	mRNA binding,structural constituent of ribosome,rRNA binding	ribosomal small subunit assembly,translation,regulation of translational fidelity
C57Bl6 / alb-SREBP-1c	P97792;P97792-2	CXAR_MOUSE	P97792;P97792-2	P97792;P97792-2	-1.43095	1.43095	0.504679	5	2	-62.9114	0.370886	-2.69624	C57Bl6	alb-SREBP-1c	Coxsackievirus and adenovirus receptor homolog;Isoform 2 of Coxsackievirus and adenovirus receptor homolog	Cxadr	acrosomal vesicle,extracellular space,nucleus,nucleoplasm,cytoplasm,plasma membrane,cell-cell junction,adherens junction,cell-cell adherens junction,bicellular tight junction,intercalated disc,integral component of membrane,basolateral plasma membrane,apicolateral plasma membrane,cell junction,filopodium,growth cone,neuromuscular junction,macromolecular complex,neuron projection,cell body,membran…	receptor binding,integrin binding,protein binding,beta-catenin binding,PDZ domain binding,identical protein binding,cell adhesion molecule binding,connexin binding,cell adhesive protein binding involved in AV node cell-bundle of His cell communication;	mitochondrion organization,heterophilic cell-cell adhesion via plasma membrane cell adhesion molecules,heart development,germ cell migration,epithelial structure maintenance,neutrophil chemotaxis,actin cytoskeleton reorganization,homotypic cell-cell adhesion,cell-cell junction organization,gamma-delta T cell activation,cardiac muscle fiber development,defense response to virus,negative regulation…
C57Bl6 / alb-SREBP-1c	Q9EQK5	MVP_MOUSE	Q9EQK5	Q9EQK5	-1.43075	1.43075	0.279112	4	7	-62.9063	0.370937	-2.69587	C57Bl6	alb-SREBP-1c	Major vault protein	Mvp	nucleus,cytoplasm,cytosol,cytoskeleton,perinuclear region of cytoplasm	protein kinase binding,protein phosphatase binding,identical protein binding	cell proliferation,regulation of signaling,negative regulation of signaling,negative regulation of protein autophosphorylation,ERBB signaling pathway,negative regulation of protein tyrosine kinase activity,protein activation cascade
C57Bl6 / alb-SREBP-1c	P14115	RL27A_MOUSE	P14115	P14115	-1.41717	1.41717	0.158957	6	6	-62.5553	0.374447	-2.67061	C57Bl6	alb-SREBP-1c	60S ribosomal protein L27a	Rpl27a	endoplasmic reticulum,cytosol,cytosolic large ribosomal subunit	RNA binding,structural constituent of ribosome	cytoplasmic translation
C57Bl6 / alb-SREBP-1c	Q5HZI9	S2551_MOUSE	Q5HZI9	Q5HZI9	-1.40729	1.40729	0.181297	6	5	-62.298	0.37702	-2.65238	C57Bl6	alb-SREBP-1c	Solute carrier family 25 member 51	Slc25a51	mitochondrion,mitochondrial inner membrane,integral component of membrane	transmembrane transporter activity	mitochondrial transport,transmembrane transport
C57Bl6 / alb-SREBP-1c	P62315	SMD1_MOUSE	P62315	P62315	-1.40212	1.40212	0.557751	2	1	-62.1628	0.378372	-2.6429	C57Bl6	alb-SREBP-1c	Small nuclear ribonucleoprotein Sm D1	Snrpd1	commitment complex,nucleus,U5 snRNP,U1 snRNP,U2 snRNP,U4 snRNP,U12-type spliceosomal complex,cytoplasm,cytosol,methylosome,pICln-Sm protein complex,SMN-Sm protein complex,U2-type catalytic step 2 spliceosome,prespliceosome,precatalytic spliceosome,catalytic step 2 spliceosome,spliceosomal tri-snRNP complex	RNA binding,protein binding,U1 snRNP binding	spliceosomal complex assembly,spliceosomal snRNP assembly
C57Bl6 / alb-SREBP-1c	P47911	RL6_MOUSE	P47911	P47911	-1.38594	1.38594	9.27833e-12	38	15	-61.736	0.38264	-2.61343	C57Bl6	alb-SREBP-1c	60S ribosomal protein L6	Rpl6	nucleus,nucleolus,cytoplasm,rough endoplasmic reticulum,cytosolic large ribosomal subunit,cytoplasmic ribonucleoprotein granule,polysomal ribosome	RNA binding,structural constituent of ribosome,cadherin binding	ribosomal large subunit assembly,cytoplasmic translation
C57Bl6 / alb-SREBP-1c	P62918	RL8_MOUSE	P62918	P62918	-1.3756	1.3756	0.00200623	16	10	-61.4607	0.385393	-2.59476	C57Bl6	alb-SREBP-1c	60S ribosomal protein L8	Rpl8	cytosolic large ribosomal subunit,polysomal ribosome	RNA binding,structural constituent of ribosome,protein binding,rRNA binding	cytoplasmic translation
C57Bl6 / alb-SREBP-1c	P62702	RS4X_MOUSE	P62702	P62702	-1.35419	1.35419	0.000185523	32	14	-60.8845	0.391155	-2.55653	C57Bl6	alb-SREBP-1c	40S ribosomal protein S4, X isoform	Rps4x	ribosome,polysome,small ribosomal subunit,cytosolic small ribosomal subunit,ribonucleoprotein complex	RNA binding,structural constituent of ribosome,rRNA binding	translation,multicellular organism development
C57Bl6 / alb-SREBP-1c	P62270	RS18_MOUSE	P62270	P62270	-1.3499	1.3499	0.0496623	23	11	-60.7681	0.392319	-2.54895	C57Bl6	alb-SREBP-1c	40S ribosomal protein S18	Rps18	nucleus,cytosol,small ribosomal subunit,cytosolic small ribosomal subunit	structural constituent of ribosome,protein binding,rRNA binding	translation,ribosome biogenesis
C57Bl6 / alb-SREBP-1c	Q8BJZ4	RT35_MOUSE	Q8BJZ4	Q8BJZ4	-1.34809	1.34809	0.588081	26	12	-60.7188	0.392812	-2.54575	C57Bl6	alb-SREBP-1c	28S ribosomal protein S35, mitochondrial	Mrps35	mitochondrion,mitochondrial small ribosomal subunit	structural constituent of ribosome	biological_process
C57Bl6 / alb-SREBP-1c	P25444	RS2_MOUSE	P25444	P25444	-1.32462	1.32462	0.164193	8	10	-60.0744	0.399256	-2.50466	C57Bl6	alb-SREBP-1c	40S ribosomal protein S2	Rps2	nucleoplasm,cytosolic small ribosomal subunit	mRNA binding,structural constituent of ribosome,fibroblast growth factor binding,enzyme binding,cadherin binding	translation,positive regulation of ubiquitin-protein transferase activity,cellular response to interleukin-4
C57Bl6 / alb-SREBP-1c	Q61285	ABCD2_MOUSE	Q61285	Q61285	-1.31038	1.31038	0.275061	119	44	-59.6785	0.403215	-2.48007	C57Bl6	alb-SREBP-1c	ATP-binding cassette sub-family D member 2	Abcd2	mitochondrion,peroxisome,peroxisomal membrane,integral component of membrane	ATP binding,ATPase activity, coupled to transmembrane movement of substances,protein homodimerization activity	very long-chain fatty acid metabolic process,fatty acid beta-oxidation,positive regulation of fatty acid beta-oxidation,very long-chain fatty acid catabolic process,transmembrane transport
C57Bl6 / alb-SREBP-1c	P42208	SEPT2_MOUSE	P42208	P42208	-1.29924	1.29924	0.554123	3	3	-59.3659	0.406341	-2.46099	C57Bl6	alb-SREBP-1c	Septin-2	2019-09-02	condensed chromosome kinetochore,nucleus,cytoplasm,actomyosin contractile ring,spindle microtubule,plasma membrane,axoneme,cell cortex,cell surface,actin cytoskeleton,microtubule cytoskeleton,midbody,septin complex,cleavage furrow,photoreceptor connecting cilium,ciliary transition zone,cell projection,myelin sheath,synapse,ciliary membrane,sperm annulus,Requires Ontology	GTPase activity,protein binding,GTP binding,enzyme regulator activity,protein complex scaffold,identical protein binding,cadherin binding	regulation of L-glutamate transport,smoothened signaling pathway,spermatogenesis,cell differentiation,regulation of protein localization,regulation of catalytic activity,protein polymerization,cilium morphogenesis,cytoskeleton-dependent cytokinesis
C57Bl6 / alb-SREBP-1c	P62855	RS26_MOUSE	P62855	P62855	-1.29881	1.29881	0.259766	4	4	-59.3539	0.406461	-2.46026	C57Bl6	alb-SREBP-1c	40S ribosomal protein S26	Rps26	cytosolic small ribosomal subunit,polysomal ribosome,cytoplasmic side of rough endoplasmic reticulum membrane	mRNA binding,structural constituent of ribosome,cadherin binding	cytoplasmic translation,negative regulation of RNA splicing
C57Bl6 / alb-SREBP-1c	Q922U2	K2C5_MOUSE	Q922U2	Q922U2	-1.29789	1.29789	9.48507e-05	21	8	-59.3278	0.406722	-2.45868	C57Bl6	alb-SREBP-1c	Keratin, type II cytoskeletal 5	Krt5	cytoplasm,mitochondrion,intermediate filament,plasma membrane,keratin filament	structural molecule activity,protein binding,scaffold protein binding
C57Bl6 / alb-SREBP-1c	P62301	RS13_MOUSE	P62301	P62301	-1.29419	1.29419	0.00808494	15	9	-59.2234	0.407766	-2.45238	C57Bl6	alb-SREBP-1c	40S ribosomal protein S13	Rps13	nucleus,nucleolus,cytosolic small ribosomal subunit	mRNA binding,structural constituent of ribosome,mRNA 5'-UTR binding,small ribosomal subunit rRNA binding	translation,negative regulation of RNA splicing
C57Bl6 / alb-SREBP-1c	P14131	RS16_MOUSE	P14131	P14131	-1.29351	1.29351	0.00117733	18	10	-59.2043	0.407957	-2.45124	C57Bl6	alb-SREBP-1c	40S ribosomal protein S16	Rps16	small ribosomal subunit,cytosolic small ribosomal subunit	RNA binding,structural constituent of ribosome	maturation of SSU-rRNA from tricistronic rRNA transcript (SSU-rRNA, 5.8S rRNA, LSU-rRNA),rRNA processing,translation,ribosomal small subunit biogenesis,cellular response to leukemia inhibitory factor
C57Bl6 / alb-SREBP-1c	P47963	RL13_MOUSE	P47963	P47963	-1.29234	1.29234	0.00363187	15	11	-59.1711	0.408289	-2.44925	C57Bl6	alb-SREBP-1c	60S ribosomal protein L13	Rpl13	nucleolus,endoplasmic reticulum,cytosol,cytosolic large ribosomal subunit	RNA binding,structural constituent of ribosome	translation
C57Bl6 / alb-SREBP-1c	Q9DBA8	HUTI_MOUSE	Q9DBA8	Q9DBA8	-1.28261	1.28261	0.553638	2	3	-58.8948	0.411052	-2.43278	C57Bl6	alb-SREBP-1c	Probable imidazolonepropionase	Amdhd1	cytoplasm	metal ion binding,imidazolonepropionase activity	histidine catabolic process to glutamate and formamide,histidine catabolic process to glutamate and formate
C57Bl6 / alb-SREBP-1c	P62082	RS7_MOUSE	P62082	P62082	-1.28181	1.28181	0.0057884	20	11	-58.8721	0.411279	-2.43144	C57Bl6	alb-SREBP-1c	40S ribosomal protein S7	Rps7	nucleus,nucleolus,cytosolic small ribosomal subunit,90S preribosome,small-subunit processome,macromolecular complex,centrosome	mRNA 3'-UTR binding,structural constituent of ribosome,poly(U) RNA binding,protein kinase binding,mRNA 5'-UTR binding,ubiquitin ligase inhibitor activity	neural tube closure,cytoplasmic translation,rRNA processing,positive regulation of gene expression,cell differentiation,ribosomal small subunit biogenesis,protein stabilization,positive regulation of intrinsic apoptotic signaling pathway by p53 class mediator,negative regulation of ubiquitin protein ligase activity,negative regulation of protein ubiquitination involved in ubiquitin-dependent prot…
C57Bl6 / alb-SREBP-1c	Q9QWL7	K1C17_MOUSE	Q9QWL7	Q9QWL7	-1.25131	1.25131	0.0077316	8	5	-57.9932	0.420068	-2.38057	C57Bl6	alb-SREBP-1c	Keratin, type I cytoskeletal 17	Krt17	cytoplasm,intermediate filament,intermediate filament cytoskeleton,cell periphery	structural molecule activity,protein binding,MHC class II receptor activity,MHC class II protein binding	morphogenesis of an epithelium,signal transduction,positive regulation of cell growth,hair follicle morphogenesis,keratinization,intermediate filament organization,positive regulation of translation,positive regulation of hair follicle development
C57Bl6 / alb-SREBP-1c	Q6P8J7	KCRS_MOUSE	Q6P8J7	Q6P8J7	-1.25116	1.25116	0.00405882	10	8	-57.9889	0.420111	-2.38032	C57Bl6	alb-SREBP-1c	Creatine kinase S-type, mitochondrial	Ckmt2	mitochondrion,mitochondrial inner membrane	creatine kinase activity,ATP binding	phosphocreatine metabolic process,phosphorylation
C57Bl6 / alb-SREBP-1c	Q91YP2	NEUL_MOUSE	Q91YP2	Q91YP2	-1.23918	1.23918	0.449088	6	14	-57.6386	0.423614	-2.36064	C57Bl6	alb-SREBP-1c	Neurolysin, mitochondrial	Nln	mitochondrion,mitochondrial intermembrane space,plasma membrane	metalloendopeptidase activity,peptidase activity,peptide binding,metal ion binding	regulation of gluconeogenesis,proteolysis,peptide metabolic process,regulation of skeletal muscle fiber differentiation
C57Bl6 / alb-SREBP-1c	Q8C1A3	MTRR_MOUSE	Q8C1A3	Q8C1A3	-1.23782	1.23782	0.261148	3	1	-57.5988	0.424012	-2.35842	C57Bl6	alb-SREBP-1c	Methionine synthase reductase	Mtrr	cytoplasm	NADPH-hemoprotein reductase activity,FMN binding,oxidoreductase activity, oxidizing metal ions, NAD or NADP as acceptor,[methionine synthase] reductase activity,aquacobalamin reductase activity,aquacobalamin reductase (NADPH) activity,flavin adenine dinucleotide binding,NADPH binding,FAD binding	DNA methylation,methionine biosynthetic process,S-adenosylmethionine cycle,homocysteine catabolic process,folic acid metabolic process,homocysteine metabolic process,protein stabilization,oxidation-reduction process,negative regulation of cystathionine beta-synthase activity
C57Bl6 / alb-SREBP-1c	O55142	RL35A_MOUSE	O55142	O55142	-1.23387	1.23387	5.4251e-07	24	7	-57.4824	0.425176	-2.35197	C57Bl6	alb-SREBP-1c	60S ribosomal protein L35a	Rpl35a	mitochondrion,cytosolic large ribosomal subunit	structural constituent of ribosome	cytoplasmic translation,rRNA processing,ribosomal large subunit biogenesis
C57Bl6 / alb-SREBP-1c	Q6ZWV3	RL10_MOUSE	Q6ZWV3	Q6ZWV3	-1.20261	1.20261	9.40786e-09	26	8	-56.5511	0.434489	-2.30155	C57Bl6	alb-SREBP-1c	60S ribosomal protein L10	Rpl10	nucleus,cytoplasm,endoplasmic reticulum,cytosol,cytosolic large ribosomal subunit,macromolecular complex,smooth endoplasmic reticulum	RNA binding,structural constituent of ribosome,translation regulator activity	ribosomal large subunit assembly,negative regulation of transcription from RNA polymerase II promoter,translation,regulation of translation,negative regulation of apoptotic process,embryonic brain development
C57Bl6 / alb-SREBP-1c	P16460	ASSY_MOUSE	P16460	P16460	-1.20215	1.20215	1.47698e-36	175	35	-56.5372	0.434628	-2.30082	C57Bl6	alb-SREBP-1c	Argininosuccinate synthase	Ass1	nucleus,mitochondrion,mitochondrial outer membrane,lysosome,endoplasmic reticulum,cytosol,perikaryon,myelin sheath,cell body fiber	argininosuccinate synthase activity,protein binding,ATP binding,toxic substance binding,amino acid binding,identical protein binding	urea cycle,citrulline metabolic process,argininosuccinate metabolic process,kidney development,liver development,arginine biosynthetic process,aspartate metabolic process,acute-phase response,midgut development,aging,response to nutrient,circadian rhythm,response to zinc ion,response to mycotoxin,response to estradiol,positive regulation of nitric oxide biosynthetic process,response to growth hor…
C57Bl6 / alb-SREBP-1c	Q8BP67	RL24_MOUSE	Q8BP67	Q8BP67	-1.19599	1.19599	0.00023156	23	11	-56.3513	0.436487	-2.29102	C57Bl6	alb-SREBP-1c	60S ribosomal protein L24	Rpl24	cytoplasm,endoplasmic reticulum,cytosol,cytosolic large ribosomal subunit,polysomal ribosome	RNA binding,structural constituent of ribosome,cadherin binding	ribosomal large subunit assembly,cytoplasmic translation,translation,mitotic cell cycle checkpoint,exit from mitosis,optic nerve development,retinal ganglion cell axon guidance,retina development in camera-type eye,assembly of large subunit precursor of preribosome
C57Bl6 / alb-SREBP-1c	P53026	RL10A_MOUSE	P53026	P53026	-1.19252	1.19252	2.52985e-08	37	13	-56.2462	0.437538	-2.28552	C57Bl6	alb-SREBP-1c	60S ribosomal protein L10a	Rpl10a	mitochondrion,cytosolic large ribosomal subunit,polysomal ribosome	RNA binding,structural constituent of ribosome	maturation of LSU-rRNA,cytoplasmic translation,translation
C57Bl6 / alb-SREBP-1c	Q7TN22;Q7TN22-2	TXD16_MOUSE	Q7TN22;Q7TN22-2	Q7TN22;Q7TN22-2	-1.17575	1.17575	0.129532	3	1	-55.7346	0.442654	-2.2591	C57Bl6	alb-SREBP-1c	Thioredoxin domain-containing protein 16;Isoform 2 of Thioredoxin domain-containing protein 16	Txndc16	extracellular region,endoplasmic reticulum lumen;	molecular_function;	biological_process,cell redox homeostasis;
C57Bl6 / alb-SREBP-1c	Q91VU6;Q91VU6-2	DCA11_MOUSE	Q91VU6;Q91VU6-2	Q91VU6;Q91VU6-2	-1.16616	1.16616	0.345417	2	1	-55.4394	0.445606	-2.24413	C57Bl6	alb-SREBP-1c	DDB1- and CUL4-associated factor 11;Isoform 2 of DDB1- and CUL4-associated factor 11	Dcaf11	nucleoplasm,Cul4-RING E3 ubiquitin ligase complex;	molecular_function;	biological_process,protein ubiquitination;
C57Bl6 / alb-SREBP-1c	P63325	RS10_MOUSE	P63325	P63325	-1.16228	1.16228	0.194865	9	6	-55.3193	0.446807	-2.2381	C57Bl6	alb-SREBP-1c	40S ribosomal protein S10	Rps10	nucleolus,cytosol,cytosolic small ribosomal subunit	RNA binding,structural constituent of ribosome	ribosomal small subunit assembly
C57Bl6 / alb-SREBP-1c	P09405	NUCL_MOUSE	P09405	P09405	-1.14998	1.14998	4.52927e-17	55	18	-54.9369	0.450631	-2.21911	C57Bl6	alb-SREBP-1c	Nucleolin	Ncl	nucleus,nucleoplasm,nucleolus,cell cortex,cytoplasmic ribonucleoprotein granule,ribonucleoprotein complex	RNA binding,protein binding,protein C-terminus binding,telomeric DNA binding,identical protein binding,DNA topoisomerase binding,mRNA 5'-UTR binding	angiogenesis,negative regulation of translation,positive regulation of transcription from RNA polymerase II promoter,cellular response to epidermal growth factor stimulus,positive regulation of transcription of nuclear large rRNA transcript from RNA polymerase I promoter,cellular response to leukemia inhibitory factor
C57Bl6 / alb-SREBP-1c	Q5XJY4	PARL_MOUSE	Q5XJY4	Q5XJY4	-1.13989	1.13989	0.408516	12	6	-54.6205	0.453795	-2.20364	C57Bl6	alb-SREBP-1c	Presenilins-associated rhomboid-like protein, mitochondrial	Parl	nucleus,mitochondrion,mitochondrial inner membrane,integral component of membrane	endopeptidase activity,serine-type endopeptidase activity	proteolysis,regulation of mitochondrion organization,regulation of proteolysis,negative regulation of release of cytochrome c from mitochondria,regulation of mitophagy,regulation of protein targeting to mitochondrion,regulation of reactive oxygen species metabolic process,negative regulation of intrinsic apoptotic signaling pathway
C57Bl6 / alb-SREBP-1c	Q0GNC1;Q0GNC1-3	INF2_MOUSE	Q0GNC1;Q0GNC1-3	Q0GNC1;Q0GNC1-3	-1.13856	1.13856	0.0888041	12	4	-54.5788	0.454212	-2.20161	C57Bl6	alb-SREBP-1c	Inverted formin-2;Isoform 2 of Inverted formin-2	Inf2	perinuclear region of cytoplasm;	actin binding,Rho GTPase binding;	actin cytoskeleton organization,regulation of cellular component size,regulation of mitochondrial fission;
C57Bl6 / alb-SREBP-1c	Q8VED5	K2C79_MOUSE	Q8VED5	Q8VED5	-1.1373	1.1373	0.211601	3	1	-54.5391	0.454609	-2.19969	C57Bl6	alb-SREBP-1c	Keratin, type II cytoskeletal 79	Krt79	keratin filament	structural molecule activity,enzyme binding
C57Bl6 / alb-SREBP-1c	Q8CIE6	COPA_MOUSE	Q8CIE6	Q8CIE6	-1.13216	1.13216	0.175663	4	6	-54.3769	0.456231	-2.19187	C57Bl6	alb-SREBP-1c	Coatomer subunit alpha	Copa	Golgi membrane,extracellular space,cytoplasm,COPI vesicle coat	hormone activity,structural molecule activity	intracellular protein transport,ER to Golgi vesicle-mediated transport,retrograde vesicle-mediated transport, Golgi to ER,intra-Golgi vesicle-mediated transport,regulation of receptor activity,pancreatic juice secretion
C57Bl6 / alb-SREBP-1c	P62717	RL18A_MOUSE	P62717	P62717	-1.12106	1.12106	0.00298448	18	10	-54.0245	0.459755	-2.17507	C57Bl6	alb-SREBP-1c	60S ribosomal protein L18a	Rpl18a	cytosolic large ribosomal subunit,polysomal ribosome	RNA binding,structural constituent of ribosome	cytoplasmic translation,translation,response to antineoplastic agent
C57Bl6 / alb-SREBP-1c	Q6IME9	K2C72_MOUSE	Q6IME9	Q6IME9	-1.11567	1.11567	0.40696	2	1	-53.8524	0.461476	-2.16696	C57Bl6	alb-SREBP-1c	Keratin, type II cytoskeletal 72	Krt72	keratin filament	structural molecule activity
C57Bl6 / alb-SREBP-1c	P55050	FABPI_MOUSE	P55050	P55050	-1.11413	1.11413	0.138503	4	2	-53.8031	0.461969	-2.16465	C57Bl6	alb-SREBP-1c	Fatty acid-binding protein, intestinal	Fabp2	intracellular,cytoplasm	long-chain fatty acid binding	intestinal lipid absorption
C57Bl6 / alb-SREBP-1c	Q9CZX8	RS19_MOUSE	Q9CZX8	Q9CZX8	-1.09527	1.09527	7.52345e-05	25	13	-53.195	0.46805	-2.13652	C57Bl6	alb-SREBP-1c	40S ribosomal protein S19	Rps19	nucleoplasm,nucleolus,cytoplasm,cytosol,ribosome,cytosolic small ribosomal subunit	structural constituent of ribosome,fibroblast growth factor binding,protein kinase binding,protein homodimerization activity	ribosomal small subunit assembly,maturation of SSU-rRNA from tricistronic rRNA transcript (SSU-rRNA, 5.8S rRNA, LSU-rRNA),monocyte chemotaxis,rRNA processing,translation,nucleolus organization,Notch signaling pathway,erythrocyte differentiation,maturation of SSU-rRNA,killing of cells of other organism,ribosomal small subunit biogenesis,defense response to Gram-negative bacterium,protein tetrameri…
C57Bl6 / alb-SREBP-1c	P62858	RS28_MOUSE	P62858	P62858	-1.09084	1.09084	0.00457859	6	4	-53.0512	0.469488	-2.12998	C57Bl6	alb-SREBP-1c	40S ribosomal protein S28	Rps28	cytosolic small ribosomal subunit,polysomal ribosome,cytoplasmic side of rough endoplasmic reticulum membrane	RNA binding,structural constituent of ribosome	ribosomal small subunit assembly,cytoplasmic translation,rRNA processing,maturation of SSU-rRNA,ribosome biogenesis,ribosomal small subunit biogenesis
C57Bl6 / alb-SREBP-1c	Q3TTY5	K22E_MOUSE	Q3TTY5	Q3TTY5	-1.0884	1.0884	1.37136e-05	23	7	-52.9719	0.470281	-2.12639	C57Bl6	alb-SREBP-1c	Keratin, type II cytoskeletal 2 epidermal	Krt2	cornified envelope,keratin filament	structural molecule activity,cytoskeletal protein binding,structural constituent of epidermis	keratinocyte development,epidermis development,peptide cross-linking,keratinization,keratinocyte activation,keratinocyte proliferation,intermediate filament organization,keratinocyte migration
C57Bl6 / alb-SREBP-1c	P01631	KV2A7_MOUSE	P01631	P01631	-1.08732	1.08732	0.466202	3	1	-52.9366	0.470634	-2.12479	C57Bl6	alb-SREBP-1c	Ig kappa chain V-II region 26-10	NaN		antigen binding
C57Bl6 / alb-SREBP-1c	Q91XE4	ACY3_MOUSE	Q91XE4	Q91XE4	-1.07824	1.07824	0.510847	4	3	-52.6393	0.473607	-2.11145	C57Bl6	alb-SREBP-1c	N-acyl-aromatic-L-amino acid amidohydrolase (carboxylate-forming)	Acy3	cytoplasm,membrane,apical plasma membrane	aminoacylase activity,protein binding,hydrolase activity, acting on ester bonds,identical protein binding,metal ion binding	metabolic process
C57Bl6 / alb-SREBP-1c	P01867;P01867-2	IGG2B_MOUSE	P01867;P01867-2	P01867;P01867-2	-1.06157	1.06157	0.160026	6	3	-52.0889	0.479111	-2.0872	C57Bl6	alb-SREBP-1c	Ig gamma-2B chain C region;Isoform 2 of Ig gamma-2B chain C region	Igh-3	extracellular space,external side of plasma membrane,integral component of membrane,immunoglobulin complex, circulating,blood microparticle;	antigen binding,protein binding,immunoglobulin receptor binding;	positive regulation of type IIa hypersensitivity,positive regulation of type I hypersensitivity,humoral immune response mediated by circulating immunoglobulin,phagocytosis, recognition,phagocytosis, engulfment,complement activation, classical pathway,immunoglobulin mediated immune response,defense response to bacterium,innate immune response,positive regulation of phagocytosis,positive regulation…
C57Bl6 / alb-SREBP-1c	P97351	RS3A_MOUSE	P97351	P97351	-1.05626	1.05626	5.1082e-07	38	17	-51.9122	0.480878	-2.07953	C57Bl6	alb-SREBP-1c	40S ribosomal protein S3a	Rps3a	nucleus,nucleolus,endoplasmic reticulum,cytosol,cytosolic small ribosomal subunit,ribonucleoprotein complex	structural constituent of ribosome,protein binding,mRNA 5'-UTR binding	cytoplasmic translation,translation,cell differentiation,negative regulation of apoptotic process
C57Bl6 / alb-SREBP-1c	P41105	RL28_MOUSE	P41105	P41105	-1.05497	1.05497	0.202347	3	4	-51.8694	0.481306	-2.07768	C57Bl6	alb-SREBP-1c	60S ribosomal protein L28	Rpl28	cytosolic large ribosomal subunit,dendrite,cytoplasmic ribonucleoprotein granule,cell body	structural constituent of ribosome	translation
C57Bl6 / alb-SREBP-1c	P04104	K2C1_MOUSE	P04104	P04104	-1.04782	1.04782	2.67925e-05	17	4	-51.6301	0.483699	-2.0674	C57Bl6	alb-SREBP-1c	Keratin, type II cytoskeletal 1	Krt1	cornified envelope,membrane,extracellular matrix,keratin filament	carbohydrate binding,structural constituent of epidermis	complement activation, lectin pathway,peptide cross-linking,negative regulation of inflammatory response,establishment of skin barrier
C57Bl6 / alb-SREBP-1c	P62852	RS25_MOUSE	P62852	P62852	-1.0455	1.0455	0.146605	4	5	-51.5524	0.484476	-2.06409	C57Bl6	alb-SREBP-1c	40S ribosomal protein S25	Rps25	nucleus,nucleolus,ribosome,cytosolic small ribosomal subunit
C57Bl6 / alb-SREBP-1c	P62908	RS3_MOUSE	P62908	P62908	-1.04379	1.04379	3.2482e-05	41	20	-51.4947	0.485053	-2.06163	C57Bl6	alb-SREBP-1c	40S ribosomal protein S3	Rps3	nucleus,nucleolus,cytoplasm,mitochondrial inner membrane,mitochondrial matrix,endoplasmic reticulum,cytosol,ribosome,polysome,plasma membrane,cytosolic small ribosomal subunit,dendrite,ruffle membrane,NF-kappaB complex,mitotic spindle,ribonucleoprotein complex	DNA binding,damaged DNA binding,RNA binding,mRNA binding,structural constituent of ribosome,DNA-(apurinic or apyrimidinic site) lyase activity,endodeoxyribonuclease activity,protein binding,microtubule binding,transcription factor binding,oxidized purine nucleobase lesion DNA N-glycosylase activity,tubulin binding,enzyme binding,kinase binding,protein kinase binding,Hsp70 protein binding,oxidized…	cytoplasmic translation,DNA repair,transcription, DNA-templated,apoptotic process,response to oxidative stress,chromosome segregation,positive regulation of gene expression,negative regulation of translation,positive regulation of microtubule polymerization,positive regulation of protein complex assembly,negative regulation of protein ubiquitination,positive regulation of endodeoxyribonuclease ac…
C57Bl6 / alb-SREBP-1c	P99027	RLA2_MOUSE	P99027	P99027	-1.04217	1.04217	6.26789e-08	23	6	-51.4402	0.485598	-2.05932	C57Bl6	alb-SREBP-1c	60S acidic ribosomal protein P2	Rplp2	cytosolic large ribosomal subunit	structural constituent of ribosome	cytoplasmic translation,translational elongation
C57Bl6 / alb-SREBP-1c	Q6ZWN5	RS9_MOUSE	Q6ZWN5	Q6ZWN5	-1.03882	1.03882	0.0778254	30	13	-51.3274	0.486726	-2.05454	C57Bl6	alb-SREBP-1c	40S ribosomal protein S9	Rps9	nucleolus,cytoplasm,cytosolic small ribosomal subunit,ribonucleoprotein complex	structural constituent of ribosome,rRNA binding,translation regulator activity	translation,positive regulation of cell proliferation,positive regulation of translational fidelity
C57Bl6 / alb-SREBP-1c	Q8VCI5	PEX19_MOUSE	Q8VCI5	Q8VCI5	-1.03595	1.03595	0.00164679	14	6	-51.2305	0.487695	-2.05046	C57Bl6	alb-SREBP-1c	Peroxisomal biogenesis factor 19	Pex19	nucleus,nucleoplasm,cytoplasm,peroxisome,peroxisomal membrane,cytosol,integral component of membrane,macromolecular complex	protein binding,peroxisome membrane targeting sequence binding,peroxisome membrane class-1 targeting sequence binding,protein N-terminus binding,ATPase binding	protein targeting to peroxisome,peroxisome organization,peroxisome membrane biogenesis,peroxisome fission,protein import into peroxisome membrane,protein stabilization,chaperone-mediated protein folding,chaperone-mediated protein transport,establishment of protein localization to peroxisome,negative regulation of lipid binding
C57Bl6 / alb-SREBP-1c	Q8BK03	MIGA2_MOUSE	Q8BK03	Q8BK03	-1.0329	1.0329	2.44947e-07	35	15	-51.1275	0.488725	-2.04614	C57Bl6	alb-SREBP-1c	Mitoguardin 2	Miga2	mitochondrial outer membrane,integral component of plasma membrane	protein homodimerization activity,protein heterodimerization activity	mitochondrial fusion,bone development
C57Bl6 / alb-SREBP-1c	B5X0G2	MUP17_MOUSE	B5X0G2	B5X0G2	-1.03256	1.03256	0.176434	12	3	-51.1157	0.488843	-2.04565	C57Bl6	alb-SREBP-1c	Major urinary protein 17	Mup17	cellular_component,extracellular region	molecular_function,pheromone binding,small molecule binding	biological_process
C57Bl6 / alb-SREBP-1c	P14206	RSSA_MOUSE	P14206	P14206	-1.02955	1.02955	0.00929717	22	12	-51.0136	0.489864	-2.04138	C57Bl6	alb-SREBP-1c	40S ribosomal protein SA	Rpsa	basement membrane,nucleus,cytoplasm,plasma membrane,small ribosomal subunit,membrane,cytosolic small ribosomal subunit,90S preribosome,neuronal cell body	structural constituent of ribosome,laminin receptor activity,ribosome binding,laminin binding	ribosomal small subunit assembly,endonucleolytic cleavage in ITS1 to separate SSU-rRNA from 5.8S rRNA and LSU-rRNA from tricistronic rRNA transcript (SSU-rRNA, 5.8S rRNA, LSU-rRNA),endonucleolytic cleavage to generate mature 3'-end of SSU-rRNA from (SSU-rRNA, 5.8S rRNA, LSU-rRNA),rRNA export from nucleus,translation,epithelial cell differentiation,cell-cell adhesion
C57Bl6 / alb-SREBP-1c	P16546;P16546-2	SPTN1_MOUSE	P16546;P16546-2	P16546;P16546-2	-1.02923	1.02923	0.0795564	26	16	-51.0027	0.489973	-2.04093	C57Bl6	alb-SREBP-1c	Spectrin alpha chain, non-erythrocytic 1;Isoform 2 of Spectrin alpha chain, non-erythrocytic 1	Sptan1	fascia adherens,microtubule cytoskeleton,membrane,lateral plasma membrane,Z disc,cortical cytoskeleton,cuticular plate,paranode region of axon,myelin sheath,intracellular membrane-bounded organelle;	actin binding,calcium ion binding,protein binding,calmodulin binding,spectrin binding,cadherin binding,protein heterodimerization activity;	actin filament capping;
C57Bl6 / alb-SREBP-1c	P08730	K1C13_MOUSE	P08730	P08730	-1.0176	1.0176	0.000565063	21	14	-50.6064	0.493936	-2.02455	C57Bl6	alb-SREBP-1c	Keratin, type I cytoskeletal 13	Krt13	keratin filament,intermediate filament cytoskeleton,extracellular exosome	structural molecule activity,protein binding	cytoskeleton organization,response to radiation,tongue morphogenesis,cellular response to retinoic acid
C57Bl6 / alb-SREBP-1c	Q02788	CO6A2_MOUSE	Q02788	Q02788	-1.01628	1.01628	0.259297	3	2	-50.5611	0.494389	-2.0227	C57Bl6	alb-SREBP-1c	Collagen alpha-2(VI) chain	Col6a2	extracellular region,proteinaceous extracellular matrix,collagen trimer,extracellular space,extracellular matrix,macromolecular complex,sarcolemma		cell adhesion,response to glucose,protein heterotrimerization
C57Bl6 / alb-SREBP-1c	Q8C5W3;Q8C5W3-2	TBCEL_MOUSE	Q8C5W3;Q8C5W3-2	Q8C5W3;Q8C5W3-2	-1.00966	1.00966	0.6067	3	4	-50.3338	0.496662	-2.01344	C57Bl6	alb-SREBP-1c	Tubulin-specific chaperone cofactor E-like protein;Isoform 2 of Tubulin-specific chaperone cofactor E-like protein	Tbcel	cellular_component,cytoplasm,cytoskeleton;	molecular_function;	biological_process;
C57Bl6 / alb-SREBP-1c	Q9QY15;Q9QY15-2	DDX25_MOUSE	Q9QY15;Q9QY15-2	Q9QY15;Q9QY15-2	-1.00707	1.00707	0.0132202	3	1	-50.2443	0.497557	-2.00982	C57Bl6	alb-SREBP-1c	ATP-dependent RNA helicase DDX25;Isoform 2 of ATP-dependent RNA helicase DDX25	Ddx25	nucleus,nucleolus,cytoplasm,chromatoid body,catalytic step 2 spliceosome;	RNA binding,ATP-dependent RNA helicase activity,ATP binding;	mRNA export from nucleus,regulation of translation,multicellular organism development,spermatid development,RNA splicing,RNA secondary structure unwinding;
C57Bl6 / alb-SREBP-1c	Q62384	ZPR1_MOUSE	Q62384	Q62384	-1.00396	1.00396	0.444231	3	1	-50.1372	0.498628	-2.0055	C57Bl6	alb-SREBP-1c	Zinc finger protein ZPR1	Zpr1	nucleus,nucleoplasm,nucleolus,cytoplasm,Cajal body,axon,growth cone,SMN complex,neuronal cell body,perikaryon,perinuclear region of cytoplasm,Gemini of coiled bodies	protein binding,zinc ion binding,receptor tyrosine kinase binding,translation initiation factor binding	microtubule cytoskeleton organization,inner cell mass cell proliferation,trophectodermal cell proliferation,mRNA processing,RNA splicing,positive regulation of gene expression,spinal cord development,Cajal body organization,regulation of myelination,positive regulation of RNA splicing,DNA endoreduplication,positive regulation of protein import into nucleus,positive regulation of growth,axon devel…
C57Bl6 / alb-SREBP-1c	P67984	RL22_MOUSE	P67984	P67984	-0.998137	0.998137	0.00115031	15	5	-49.9354	0.500646	-1.99742	C57Bl6	alb-SREBP-1c	60S ribosomal protein L22	Rpl22	nucleus,cytoplasm,ribosome,cytosolic large ribosomal subunit	RNA binding,structural constituent of ribosome,heparin binding	cytoplasmic translation,alpha-beta T cell differentiation
C57Bl6 / alb-SREBP-1c	P00687	AMY1_MOUSE	P00687	P00687	-0.985854	0.985854	0.179247	8	3	-49.5073	0.504927	-1.98049	C57Bl6	alb-SREBP-1c	Alpha-amylase 1	Amy1	extracellular space	alpha-amylase activity,calcium ion binding,amylase activity,chloride ion binding,Requires Ontology	carbohydrate catabolic process
C57Bl6 / alb-SREBP-1c	Q9JJI8	RL38_MOUSE	Q9JJI8	Q9JJI8	-0.981825	0.981825	0.0540505	4	5	-49.3661	0.506339	-1.97496	C57Bl6	alb-SREBP-1c	60S ribosomal protein L38	Rpl38	cytosolic large ribosomal subunit,eukaryotic 80S initiation complex,polysomal ribosome	RNA binding,structural constituent of ribosome	skeletal system development,ossification,cytoplasmic translation,regulation of translation,sensory perception of sound,90S preribosome assembly,middle ear morphogenesis,axial mesoderm development
C57Bl6 / alb-SREBP-1c	Q6PD26	PIGS_MOUSE	Q6PD26	Q6PD26	-0.977092	0.977092	0.223064	3	2	-49.1997	0.508003	-1.96849	C57Bl6	alb-SREBP-1c	GPI transamidase component PIG-S	Pigs	GPI-anchor transamidase complex	GPI-anchor transamidase activity	attachment of GPI anchor to protein
C57Bl6 / alb-SREBP-1c	P62889	RL30_MOUSE	P62889	P62889	-0.976757	0.976757	4.57592e-12	28	9	-49.1879	0.508121	-1.96804	C57Bl6	alb-SREBP-1c	60S ribosomal protein L30	Rpl30	nucleus,cytosolic large ribosomal subunit,polysomal ribosome	RNA binding,structural constituent of ribosome	cytoplasmic translation,killing of cells of other organism,defense response to Gram-negative bacterium,Requires Ontology
C57Bl6 / alb-SREBP-1c	Q8VCF0	MAVS_MOUSE	Q8VCF0	Q8VCF0	-0.967893	0.967893	5.00227e-05	23	8	-48.8748	0.511252	-1.95598	C57Bl6	alb-SREBP-1c	Mitochondrial antiviral-signaling protein	Mavs	mitochondrion,mitochondrial outer membrane,peroxisome,peroxisomal membrane,integral component of membrane,mitochondrial membrane	signal transducer activity,protein binding,protein kinase binding,CARD domain binding	positive regulation of protein phosphorylation,activation of innate immune response,positive regulation of defense response to virus by host,signal transduction,positive regulation of type I interferon production,positive regulation of interferon-alpha production,positive regulation of interferon-beta production,positive regulation of interleukin-8 production,positive regulation of tumor necrosis…
C57Bl6 / alb-SREBP-1c	O09173	HGD_MOUSE	O09173	O09173	-0.963258	0.963258	6.9565e-07	41	16	-48.7103	0.512897	-1.94971	C57Bl6	alb-SREBP-1c	Homogentisate 1,2-dioxygenase	Hgd		homogentisate 1,2-dioxygenase activity,identical protein binding,metal ion binding	cellular amino acid metabolic process,L-phenylalanine catabolic process,tyrosine catabolic process,oxidation-reduction process
C57Bl6 / alb-SREBP-1c	P27659	RL3_MOUSE	P27659	P27659	-0.958666	0.958666	4.76371e-06	34	17	-48.5468	0.514532	-1.94351	C57Bl6	alb-SREBP-1c	60S ribosomal protein L3	Rpl3	nucleolus,cytosol,cytosolic large ribosomal subunit,macromolecular complex	RNA binding,structural constituent of ribosome,5S rRNA binding	ribosomal large subunit assembly,translation,cellular response to interleukin-4
C57Bl6 / alb-SREBP-1c	Q9D0Q7	RM45_MOUSE	Q9D0Q7	Q9D0Q7	-0.954118	0.954118	0.549385	14	8	-48.3843	0.516157	-1.9374	C57Bl6	alb-SREBP-1c	39S ribosomal protein L45, mitochondrial	Mrpl45	mitochondrion,mitochondrial large ribosomal subunit		biological_process
C57Bl6 / alb-SREBP-1c	Q9JK53	PRELP_MOUSE	Q9JK53	Q9JK53	-0.944659	0.944659	0.414465	10	5	-48.0448	0.519552	-1.92473	C57Bl6	alb-SREBP-1c	Prolargin	Prelp	extracellular region,proteinaceous extracellular matrix,extracellular space,extracellular matrix,extracellular exosome	extracellular matrix structural constituent,heparin binding	cell aging,axonogenesis
C57Bl6 / alb-SREBP-1c	Q6IFX2	K1C42_MOUSE	Q6IFX2	Q6IFX2	-0.941072	0.941072	0.100881	6	5	-47.9154	0.520846	-1.91995	C57Bl6	alb-SREBP-1c	Keratin, type I cytoskeletal 42	Krt42	cytoplasm,intermediate filament	structural molecule activity	biological_process
C57Bl6 / alb-SREBP-1c	P10853;P10854;Q64475;Q64478;Q64525;Q6ZWY9;Q8CGP1;Q8CGP2;Q8CGP2-2	H2B1F_MOUSE;H2B1M_MOUSE;H2B1B_MOUSE;H2B1H_MOUSE;H2B2B_MOUSE;H2B1C_MOUSE;H2B1K_MOUSE;H2B1P_MOUSE;H2B1P_MOUSE	P10853;P10854;Q64475;Q64478;Q64525;Q6ZWY9;Q8CGP1;Q8CGP2;Q8CGP2-2	P10853;P10854;Q64475;Q64478;Q64525;Q6ZWY9;Q8CGP1;Q8CGP2;Q8CGP2-2	-0.939746	0.939746	0.00200623	21	7	-47.8675	0.521325	-1.91819	C57Bl6	alb-SREBP-1c	Histone H2B type 1-F/J/L;Histone H2B type 1-M;Histone H2B type 1-B;Histone H2B type 1-H;Histone H2B type 2-B;Histone H2B type 1-C/E/G;Histone H2B type 1-K;Histone H2B type 1-P;Isoform 2 of Histone H2B type 1-P	Hist1h2bf;Hist1h2bm;Hist1h2bb;Hist1h2bh;Hist2h2bb;Hist1h2bc;Hist1h2bk;Hist1h2bp;Hist1h2bp	nucleosome,extracellular space,nucleus,nucleoplasm,cytosol;nucleosome,nucleus,nucleoplasm,cytosol;nucleosome,nucleus,nucleoplasm,cytosol;nucleosome,nucleoplasm;nucleosome,nucleoplasm,cytosol;nucleosome,extracellular space,nucleoplasm,cytosol;nucleosome,extracellular space,nucleus,nucleoplasm,cytosol;nucleosome,nucleus,nucleoplasm,cytosol;	DNA binding,protein binding,identical protein binding,protein heterodimerization activity;DNA binding,protein heterodimerization activity;DNA binding,protein heterodimerization activity;DNA binding,protein heterodimerization activity;DNA binding,protein heterodimerization activity;DNA binding,identical protein binding,protein heterodimerization activity;DNA binding,protein heterodimerization acti…	innate immune response in mucosa,nucleosome assembly,antibacterial humoral response,defense response to Gram-positive bacterium,Requires Ontology;nucleosome assembly;nucleosome assembly;nucleosome assembly;nucleosome assembly;innate immune response in mucosa,nucleosome assembly,antibacterial humoral response,defense response to Gram-positive bacterium,Requires Ontology;innate immune response in m…
C57Bl6 / alb-SREBP-1c	Q61176	ARGI1_MOUSE	Q61176	Q61176	-0.936509	0.936509	2.34906e-09	113	22	-47.7504	0.522496	-1.91389	C57Bl6	alb-SREBP-1c	Arginase-1	Arg1	extracellular space,mitochondrial outer membrane,neuron projection,neuronal cell body	arginase activity,manganese ion binding	urea cycle,liver development,positive regulation of endothelial cell proliferation,adaptive immune response,aging,response to herbicide,response to manganese ion,response to zinc ion,response to selenium ion,regulation of L-arginine import,response to amine,arginine catabolic process to ornithine,lung development,collagen biosynthetic process,response to vitamin A,response to vitamin E,negative r…
C57Bl6 / alb-SREBP-1c	Q8K2Y7	RM47_MOUSE	Q8K2Y7	Q8K2Y7	-0.936445	0.936445	0.530976	4	6	-47.7481	0.522519	-1.91381	C57Bl6	alb-SREBP-1c	39S ribosomal protein L47, mitochondrial	Mrpl47	mitochondrion,mitochondrial large ribosomal subunit	structural constituent of ribosome	mitochondrial translation
C57Bl6 / alb-SREBP-1c	P61971	NTF2_MOUSE	P61971	P61971	-0.927627	0.927627	0.414465	2	1	-47.4278	0.525722	-1.90214	C57Bl6	alb-SREBP-1c	Nuclear transport factor 2	Nutf2	nuclear inner membrane,nuclear outer membrane,nuclear pore,nucleoplasm,cytosol,nuclear membrane	Ran GTPase binding,protein transporter activity,structural constituent of nuclear pore,identical protein binding,nuclear import signal receptor activity	protein import into nucleus, translocation,protein import into nucleus,protein export from nucleus,mRNA transport,protein localization to nuclear pore
C57Bl6 / alb-SREBP-1c	Q9Z1T1	AP3B1_MOUSE	Q9Z1T1	Q9Z1T1	-0.925513	0.925513	0.285481	2	2	-47.3507	0.526493	-1.89936	C57Bl6	alb-SREBP-1c	AP-3 complex subunit beta-1	Ap3b1	trans-Golgi network,AP-3 adaptor complex,clathrin adaptor complex,clathrin-coated vesicle membrane,axon cytoplasm	protein phosphatase binding,GTP-dependent protein binding	protein targeting to lysosome,zinc II ion transport,intracellular protein transport,blood coagulation,anterograde axonal transport,vesicle-mediated transport,antigen processing and presentation,melanosome organization,antigen processing and presentation, exogenous lipid antigen via MHC class Ib,anterograde synaptic vesicle transport,positive regulation of NK T cell differentiation
C57Bl6 / alb-SREBP-1c	P50446	K2C6A_MOUSE	P50446	P50446	-0.919899	0.919899	3.96875e-05	33	22	-47.1454	0.528546	-1.89198	C57Bl6	alb-SREBP-1c	Keratin, type II cytoskeletal 6A	Krt6a	keratin filament	structural molecule activity	morphogenesis of an epithelium,Wnt signaling pathway,keratinization,wound healing,negative regulation of growth of symbiont on or near host surface,intermediate filament organization,defense response to Gram-positive bacterium,Requires Ontology
C57Bl6 / alb-SREBP-1c	Q99PL5	RRBP1_MOUSE	Q99PL5	Q99PL5	-0.919458	0.919458	5.72752e-14	49	44	-47.1293	0.528707	-1.89141	C57Bl6	alb-SREBP-1c	Ribosome-binding protein 1	Rrbp1	ribosome,integral component of endoplasmic reticulum membrane	protein binding	translation,signal transduction,protein transport
C57Bl6 / alb-SREBP-1c	P51410	RL9_MOUSE	P51410	P51410	-0.918929	0.918929	3.42202e-09	31	9	-47.1098	0.528902	-1.89071	C57Bl6	alb-SREBP-1c	60S ribosomal protein L9	Rpl9	cytosolic large ribosomal subunit	RNA binding,structural constituent of ribosome,rRNA binding	cytoplasmic translation,translation
C57Bl6 / alb-SREBP-1c	Q3V384	AFG1L_MOUSE	Q3V384	Q3V384	-0.918522	0.918522	0.503682	6	11	-47.0949	0.529051	-1.89018	C57Bl6	alb-SREBP-1c	AFG1-like ATPase	Afg1l	mitochondrion,mitochondrial membrane	molecular_function,ATP binding,hydrolase activity	mitochondrial electron transport, cytochrome c to oxygen,mitochondrion organization,mitochondrial protein catabolic process
C57Bl6 / alb-SREBP-1c	Q64339	ISG15_MOUSE	Q64339	Q64339	-0.917168	0.917168	0.44285	6	2	-47.0452	0.529548	-1.8884	C57Bl6	alb-SREBP-1c	Ubiquitin-like protein ISG15	Isg15	extracellular region,cytoplasm	protein binding,protein tag	modification-dependent protein catabolic process,positive regulation of bone mineralization,negative regulation of protein ubiquitination,ISG15-protein conjugation,regulation of interferon-gamma production,response to type I interferon,defense response to bacterium,negative regulation of viral genome replication,positive regulation of erythrocyte differentiation,defense response to virus
C57Bl6 / alb-SREBP-1c	O55029	COPB2_MOUSE	O55029	O55029	-0.916503	0.916503	0.150921	2	2	-47.0208	0.529792	-1.88753	C57Bl6	alb-SREBP-1c	Coatomer subunit beta'	Copb2	Golgi membrane,Golgi apparatus,cytosol,COPI vesicle coat	structural molecule activity	intracellular protein transport,ER to Golgi vesicle-mediated transport,retrograde vesicle-mediated transport, Golgi to ER,intra-Golgi vesicle-mediated transport,toxin transport
C57Bl6 / alb-SREBP-1c	P70347;P70347-2;P70347-3;P70347-4	TANK_MOUSE	P70347;P70347-2;P70347-3;P70347-4	P70347;P70347-2;P70347-3;P70347-4	-0.91387	0.91387	0.285601	3	1	-46.9241	0.530759	-1.88409	C57Bl6	alb-SREBP-1c	TRAF family member-associated NF-kappa-B activator;Isoform 2 of TRAF family member-associated NF-kappa-B activator;Isoform 3 of TRAF family member-associated NF-kappa-B activator;Isoform 4 of TRAF family member-associated NF-kappa-B activator	Tank	cytosol,macromolecular complex;;;	protein binding,ubiquitin protein ligase binding,deubiquitinase activator activity,metal ion binding,thiol-dependent ubiquitin-specific protease activity;;;	proteolysis,cellular response to DNA damage stimulus,I-kappaB kinase/NF-kappaB signaling,negative regulation of I-kappaB kinase/NF-kappaB signaling,cellular response to interleukin-1,cellular response to tumor necrosis factor,cellular response to ionizing radiation,positive regulation of protein deubiquitination,positive regulation of ubiquitin-specific protease activity;;;
C57Bl6 / alb-SREBP-1c	Q3UVK0	ERMP1_MOUSE	Q3UVK0	Q3UVK0	-0.912687	0.912687	0.206607	4	2	-46.8805	0.531195	-1.88255	C57Bl6	alb-SREBP-1c	Endoplasmic reticulum metallopeptidase 1	Ermp1	endoplasmic reticulum membrane,integral component of membrane	molecular_function,metallopeptidase activity,metal ion binding	proteolysis
C57Bl6 / alb-SREBP-1c	Q9CXW4	RL11_MOUSE	Q9CXW4	Q9CXW4	-0.91074	0.91074	2.63224e-06	18	6	-46.8088	0.531912	-1.88001	C57Bl6	alb-SREBP-1c	60S ribosomal protein L11	Rpl11	nucleoplasm,nucleolus,cytoplasm,cytosolic large ribosomal subunit,macromolecular complex,polysomal ribosome	RNA binding,structural constituent of ribosome,protein binding,5S rRNA binding,ubiquitin protein ligase binding,ubiquitin ligase inhibitor activity	ribosomal large subunit assembly,cytoplasmic translation,rRNA processing,translation,protein targeting,positive regulation of gene expression,positive regulation of protein binding,negative regulation of proteasomal ubiquitin-dependent protein catabolic process,protein localization to nucleus,ribosomal large subunit biogenesis,protein stabilization,regulation of signal transduction by p53 class m…
C57Bl6 / alb-SREBP-1c	P97425	ECP2_MOUSE	P97425	P97425	-0.907537	0.907537	0.159385	11	3	-46.6905	0.533095	-1.87584	C57Bl6	alb-SREBP-1c	Eosinophil cationic protein 2	Ear2	cellular_component	nucleic acid binding,endonuclease activity,ribonuclease activity	chemotaxis,RNA phosphodiester bond hydrolysis
C57Bl6 / alb-SREBP-1c	Q8VDJ3	VIGLN_MOUSE	Q8VDJ3	Q8VDJ3	-0.904026	0.904026	0.159385	11	22	-46.5607	0.534393	-1.87128	C57Bl6	alb-SREBP-1c	Vigilin	Hdlbp	nucleus,cytosol,high-density lipoprotein particle	RNA binding,cadherin binding	lipid transport,cholesterol metabolic process
C57Bl6 / alb-SREBP-1c	P35979	RL12_MOUSE	P35979	P35979	-0.898101	0.898101	5.40185e-08	27	7	-46.3407	0.536593	-1.86361	C57Bl6	alb-SREBP-1c	60S ribosomal protein L12	Rpl12	nucleus,nucleolus,cytoplasm,cytosolic large ribosomal subunit	structural constituent of ribosome,rRNA binding	ribosomal large subunit assembly,translation
C57Bl6 / alb-SREBP-1c	Q8BWY3	ERF1_MOUSE	Q8BWY3	Q8BWY3	-0.895001	0.895001	2.19587e-05	16	8	-46.2253	0.537747	-1.85961	C57Bl6	alb-SREBP-1c	Eukaryotic peptide chain release factor subunit 1	Etf1	cytoplasm	translation release factor activity,sequence-specific mRNA binding	nuclear-transcribed mRNA catabolic process, nonsense-mediated decay,translational termination,protein methylation,viral process
C57Bl6 / alb-SREBP-1c	O09167	RL21_MOUSE	O09167	O09167	-0.88812	0.88812	0.541096	10	4	-45.9682	0.540318	-1.85076	C57Bl6	alb-SREBP-1c	60S ribosomal protein L21	Rpl21	endoplasmic reticulum,cytosolic large ribosomal subunit	structural constituent of ribosome,protein binding	translation
C57Bl6 / alb-SREBP-1c	Q9JIF7	COPB_MOUSE	Q9JIF7	Q9JIF7	-0.882924	0.882924	0.131697	4	3	-45.7733	0.542267	-1.84411	C57Bl6	alb-SREBP-1c	Coatomer subunit beta	Copb1	Golgi membrane,endoplasmic reticulum-Golgi intermediate compartment,Golgi apparatus,cytosol,plasma membrane,COPI vesicle coat,COPI-coated vesicle,intracellular membrane-bounded organelle	structural molecule activity	intracellular protein transport,ER to Golgi vesicle-mediated transport,retrograde vesicle-mediated transport, Golgi to ER,intra-Golgi vesicle-mediated transport
C57Bl6 / alb-SREBP-1c	Q99KI3	EMC3_MOUSE	Q99KI3	Q99KI3	-0.882823	0.882823	0.0730331	6	3	-45.7695	0.542305	-1.84398	C57Bl6	alb-SREBP-1c	ER membrane protein complex subunit 3	Emc3	integral component of membrane,ER membrane protein complex	molecular_function	protein folding in endoplasmic reticulum
C57Bl6 / alb-SREBP-1c	P06330	HVM51_MOUSE	P06330	P06330	-0.876318	0.876318	0.256082	7	3	-45.5244	0.544756	-1.83568	C57Bl6	alb-SREBP-1c	Ig heavy chain V region AC38 205.12	NaN		antigen binding
C57Bl6 / alb-SREBP-1c	P62843	RS15_MOUSE	P62843	P62843	-0.871893	0.871893	0.0144951	9	5	-45.3571	0.546429	-1.83006	C57Bl6	alb-SREBP-1c	40S ribosomal protein S15	Rps15	cytosolic small ribosomal subunit	RNA binding,structural constituent of ribosome,protein binding	ribosomal small subunit assembly,ribosomal small subunit export from nucleus,rRNA processing,translation,ribosomal small subunit biogenesis
C57Bl6 / alb-SREBP-1c	Q8C0L6	PAOX_MOUSE	Q8C0L6	Q8C0L6	-0.871811	0.871811	0.424086	6	5	-45.354	0.54646	-1.82996	C57Bl6	alb-SREBP-1c	Peroxisomal N(1)-acetyl-spermine/spermidine oxidase	Paox	peroxisomal matrix	receptor binding,polyamine oxidase activity,N(1),N(12)-diacetylspermine:oxygen oxidoreductase (3-acetamidopropanal-forming) activity,spermine:oxygen oxidoreductase (spermidine-forming) activity,spermidine:oxygen oxidoreductase (3-aminopropanal-forming) activity,N1-acetylspermine:oxygen oxidoreductase (3-acetamidopropanal-forming) activity,N1-acetylspermidine:oxygen oxidoreductase (3-acetamidoprop…	polyamine catabolic process,putrescine biosynthetic process,putrescine catabolic process,spermidine catabolic process,spermine catabolic process,oxidation-reduction process,positive regulation of spermidine biosynthetic process
C57Bl6 / alb-SREBP-1c	P68037	UB2L3_MOUSE	P68037	P68037	-0.869056	0.869056	0.182518	3	1	-45.2495	0.547505	-1.82647	C57Bl6	alb-SREBP-1c	Ubiquitin-conjugating enzyme E2 L3	Ube2l3	nucleus,cytoplasm	transcription coactivator activity,ubiquitin-protein transferase activity,protein binding,ATP binding,ubiquitin protein ligase binding,ubiquitin conjugating enzyme activity,ubiquitin-protein transferase activator activity	protein polyubiquitination,transcription, DNA-templated,regulation of transcription, DNA-templated,ubiquitin-dependent protein catabolic process,cell proliferation,protein ubiquitination,positive regulation of protein ubiquitination,cell cycle phase transition,positive regulation of ubiquitin-protein transferase activity,protein K11-linked ubiquitination,cellular response to steroid hormone stimu…
C57Bl6 / alb-SREBP-1c	P02535;P02535-2;P02535-3	K1C10_MOUSE	P02535;P02535-2;P02535-3	P02535;P02535-2;P02535-3	-0.868739	0.868739	0.000248516	18	6	-45.2375	0.547625	-1.82607	C57Bl6	alb-SREBP-1c	Keratin, type I cytoskeletal 10;Isoform 2 of Keratin, type I cytoskeletal 10;Isoform 3 of Keratin, type I cytoskeletal 10	Krt10	keratin filament;;	structural molecule activity,protein binding,cytoskeletal protein binding;;	keratinocyte development,epidermis development,epithelial cell differentiation,intermediate filament organization,cellular response to calcium ion;;
C57Bl6 / alb-SREBP-1c	Q9EQH3	VPS35_MOUSE	Q9EQH3	Q9EQH3	-0.867832	0.867832	0.292282	7	3	-45.203	0.54797	-1.82492	C57Bl6	alb-SREBP-1c	Vacuolar protein sorting-associated protein 35	Vps35	cytoplasm,lysosome,endosome,early endosome,late endosome,cytosol,endosome membrane,postsynaptic density,integral component of membrane,retromer complex,retromer, cargo-selective complex,neuron projection,neuronal cell body,perinuclear region of cytoplasm,tubular endosome,mitochondrion-derived vesicle,mitochondrion	protein binding,protein transporter activity,D1 dopamine receptor binding	vacuolar protein processing,lysosome organization,positive regulation of gene expression,negative regulation of gene expression,regulation of mitochondrion organization,regulation of protein stability,protein destabilization,regulation of cellular protein metabolic process,negative regulation of protein homooligomerization,protein localization to organelle,retrograde transport, endosome to Golgi,…
C57Bl6 / alb-SREBP-1c	P62245	RS15A_MOUSE	P62245	P62245	-0.865305	0.865305	0.000196561	20	8	-45.107	0.54893	-1.82172	C57Bl6	alb-SREBP-1c	40S ribosomal protein S15a	Rps15a	cytoplasm,mitochondrion,cytosolic small ribosomal subunit	structural constituent of ribosome	translation,positive regulation of cell proliferation,response to virus,positive regulation of cell cycle
C57Bl6 / alb-SREBP-1c	P63276	RS17_MOUSE	P63276	P63276	-0.864929	0.864929	0.146605	3	8	-45.0927	0.549073	-1.82125	C57Bl6	alb-SREBP-1c	40S ribosomal protein S17	Rps17	cytosolic small ribosomal subunit	structural constituent of ribosome	ribosomal small subunit assembly,rRNA processing,translation,erythrocyte homeostasis,ribosomal small subunit biogenesis
C57Bl6 / alb-SREBP-1c	Q91XA9	CHIA_MOUSE	Q91XA9	Q91XA9	-0.863807	0.863807	0.483875	3	2	-45.0499	0.549501	-1.81983	C57Bl6	alb-SREBP-1c	Acidic mammalian chitinase	Chia	extracellular region,extracellular space,cytoplasm	chitinase activity,chitin binding,kinase binding	polysaccharide catabolic process,immune system process,production of molecular mediator involved in inflammatory response,chitin catabolic process,apoptotic process,positive regulation of chemokine secretion
C57Bl6 / alb-SREBP-1c	Q3UBX0	TM109_MOUSE	Q3UBX0	Q3UBX0	-0.863229	0.863229	0.00746694	11	3	-45.0279	0.549721	-1.81911	C57Bl6	alb-SREBP-1c	Transmembrane protein 109	Tmem109	nuclear outer membrane,endoplasmic reticulum,integral component of membrane,nuclear membrane,sarcoplasmic reticulum membrane	voltage-gated ion channel activity,protein binding	ion transmembrane transport,regulation of ion transmembrane transport,intrinsic apoptotic signaling pathway in response to DNA damage by p53 class mediator,negative regulation of cell death,cellular response to gamma radiation
C57Bl6 / alb-SREBP-1c	Q8BI84	TGO1_MOUSE	Q8BI84	Q8BI84	-0.862376	0.862376	0.05945	9	5	-44.9954	0.550046	-1.81803	C57Bl6	alb-SREBP-1c	Transport and Golgi organization protein 1 homolog	Mia3	Golgi membrane,endoplasmic reticulum membrane,integral component of membrane,intracellular membrane-bounded organelle,endoplasmic reticulum exit site	lipoprotein transporter activity	chondrocyte development,positive regulation of leukocyte migration,exocytosis,ER to Golgi vesicle-mediated transport,negative regulation of cell adhesion,protein transport,collagen fibril organization,negative regulation of cell migration,positive regulation of bone mineralization,wound healing,lipoprotein transport,cargo loading into COPII-coated vesicle
C57Bl6 / alb-SREBP-1c	Q8VD00	SGMR2_MOUSE	Q8VD00	Q8VD00	-0.860389	0.860389	0.0957792	6	2	-44.9196	0.550804	-1.81553	C57Bl6	alb-SREBP-1c	Sigma intracellular receptor 2	Tmem97	lysosome,endoplasmic reticulum,rough endoplasmic reticulum,cytosol,plasma membrane,integral component of membrane,rough endoplasmic reticulum membrane,nuclear membrane	molecular_function	cholesterol homeostasis
C57Bl6 / alb-SREBP-1c	Q8BWU8	AT2L1_MOUSE	Q8BWU8	Q8BWU8	-0.85191	0.85191	0.126352	7	5	-44.5949	0.554051	-1.80489	C57Bl6	alb-SREBP-1c	Ethanolamine-phosphate phospho-lyase	Etnppl	mitochondrion	alanine-glyoxylate transaminase activity,pyridoxal phosphate binding,identical protein binding,ethanolamine-phosphate phospho-lyase activity	biological_process
C57Bl6 / alb-SREBP-1c	P11679	K2C8_MOUSE	P11679	P11679	-0.84976	0.84976	5.16742e-13	53	20	-44.5123	0.554877	-1.8022	C57Bl6	alb-SREBP-1c	Keratin, type II cytoskeletal 8	Krt8	nucleoplasm,cytoplasm,intermediate filament,cell-cell junction,dystrophin-associated glycoprotein complex,apicolateral plasma membrane,nuclear matrix,Z disc,sarcolemma,costamere,keratin filament,intermediate filament cytoskeleton,cell periphery	structural molecule activity,protein binding,scaffold protein binding	cell morphogenesis involved in differentiation,multicellular organism development,tumor necrosis factor-mediated signaling pathway,sarcomere organization,response to hydrostatic pressure,response to other organism,cell differentiation involved in embryonic placenta development,extrinsic apoptotic signaling pathway,hepatocyte apoptotic process
C57Bl6 / alb-SREBP-1c	Q8BGI5-2	PEX26_MOUSE	Q8BGI5-2	Q8BGI5-2	-0.845501	0.845501	0.0521847	6	1	-44.3482	0.556518	-1.79689	C57Bl6	alb-SREBP-1c	Isoform 2 of Peroxisome assembly protein 26	Pex26
C57Bl6 / alb-SREBP-1c	Q99LJ8	NGBR_MOUSE	Q99LJ8	Q99LJ8	-0.837389	0.837389	0.189239	3	1	-44.0345	0.559655	-1.78681	C57Bl6	alb-SREBP-1c	Dehydrodolichyl diphosphate synthase complex subunit Nus1	Nus1	endoplasmic reticulum membrane,membrane,integral component of membrane	prenyltransferase activity	angiogenesis,dolichol biosynthetic process,cell differentiation,regulation of intracellular cholesterol transport,protein mannosylation,vascular endothelial growth factor signaling pathway,cholesterol homeostasis,positive regulation of blood vessel endothelial cell migration,positive regulation of nitric-oxide synthase activity,sterol homeostasis
C57Bl6 / alb-SREBP-1c	P12970	RL7A_MOUSE	P12970	P12970	-0.833831	0.833831	0.00222811	35	15	-43.8962	0.561038	-1.78241	C57Bl6	alb-SREBP-1c	60S ribosomal protein L7a	Rpl7a	membrane,cytosolic large ribosomal subunit,polysomal ribosome	RNA binding,protein binding,cadherin binding	maturation of LSU-rRNA,translation
C57Bl6 / alb-SREBP-1c	P18581;P18581-2	CTR2_MOUSE	P18581;P18581-2	P18581;P18581-2	-0.830709	0.830709	0.172795	2	2	-43.7747	0.562253	-1.77856	C57Bl6	alb-SREBP-1c	Cationic amino acid transporter 2;Isoform 2 of Cationic amino acid transporter 2	Slc7a2	plasma membrane,integral component of membrane,cell junction;	L-ornithine transmembrane transporter activity,high-affinity arginine transmembrane transporter activity,high-affinity lysine transmembrane transporter activity,arginine transmembrane transporter activity,L-lysine transmembrane transporter activity,L-arginine transmembrane transporter activity,low-affinity L-arginine transmembrane transporter activity,high-affinity L-ornithine transmembrane trans…	nitric oxide production involved in inflammatory response,nitric oxide biosynthetic process,macrophage activation,regulation of macrophage activation,regulation of inflammatory response,L-arginine import across plasma membrane,L-lysine import across plasma membrane,L-ornithine import across plasma membrane,L-arginine transport,L-ornithine transmembrane transport;
C57Bl6 / alb-SREBP-1c	Q9D1R9	RL34_MOUSE	Q9D1R9	Q9D1R9	-0.816599	0.816599	0.0720292	15	6	-43.2221	0.567779	-1.76125	C57Bl6	alb-SREBP-1c	60S ribosomal protein L34	Rpl34	mitochondrion,endoplasmic reticulum,cytosolic large ribosomal subunit	RNA binding,structural constituent of ribosome,cadherin binding	translation,ribosome biogenesis
C57Bl6 / alb-SREBP-1c	P14148	RL7_MOUSE	P14148	P14148	-0.815284	0.815284	0.0218788	37	14	-43.1703	0.568297	-1.75964	C57Bl6	alb-SREBP-1c	60S ribosomal protein L7	Rpl7	polysome,cytosolic large ribosomal subunit	DNA binding,RNA binding,mRNA binding,structural constituent of ribosome,protein homodimerization activity	maturation of LSU-rRNA from tricistronic rRNA transcript (SSU-rRNA, 5.8S rRNA, LSU-rRNA),cytoplasmic translation,rRNA processing,translation,ribosomal large subunit biogenesis
C57Bl6 / alb-SREBP-1c	Q8K2C7;Q8K2C7-2	OS9_MOUSE	Q8K2C7;Q8K2C7-2	Q8K2C7;Q8K2C7-2	-0.814624	0.814624	0.355735	2	1	-43.1443	0.568557	-1.75884	C57Bl6	alb-SREBP-1c	Protein OS-9;Isoform 2 of Protein OS-9	Os9	endoplasmic reticulum,endoplasmic reticulum lumen,Hrd1p ubiquitin ligase complex;	protein binding,carbohydrate binding;	ubiquitin-dependent protein catabolic process,protein targeting,protein retention in ER lumen,protein ubiquitination,ER-associated ubiquitin-dependent protein catabolic process,retrograde protein transport, ER to cytosol,response to endoplasmic reticulum stress,negative regulation of retrograde protein transport, ER to cytosol;
C57Bl6 / alb-SREBP-1c	P97426	ECP1_MOUSE	P97426	P97426	-0.810291	0.810291	0.457214	3	2	-42.9733	0.570267	-1.75357	C57Bl6	alb-SREBP-1c	Eosinophil cationic protein 1	Ear1	cytoplasm	nucleic acid binding,endonuclease activity,ribonuclease activity	RNA phosphodiester bond hydrolysis
C57Bl6 / alb-SREBP-1c	Q93092	TALDO_MOUSE	Q93092	Q93092	-0.805412	0.805412	0.195658	5	3	-42.7801	0.572199	-1.74764	C57Bl6	alb-SREBP-1c	Transaldolase	Taldo1	nucleus,nucleoplasm,cytosol	sedoheptulose-7-phosphate:D-glyceraldehyde-3-phosphate glyceronetransferase activity,monosaccharide binding	carbohydrate metabolic process,fructose 6-phosphate metabolic process,pentose-phosphate shunt, non-oxidative branch
C57Bl6 / alb-SREBP-1c	Q9D958	SPCS1_MOUSE	Q9D958	Q9D958	-0.804531	0.804531	0.0672588	6	2	-42.7452	0.572548	-1.74658	C57Bl6	alb-SREBP-1c	Signal peptidase complex subunit 1	Spcs1	signal peptidase complex,integral component of endoplasmic reticulum membrane,organelle membrane	peptidase activity,ribosome binding	signal peptide processing,protein targeting to ER
C57Bl6 / alb-SREBP-1c	P56657	CP240_MOUSE	P56657	P56657	-0.80378	0.80378	0.0372007	101	32	-42.7154	0.572846	-1.74567	C57Bl6	alb-SREBP-1c	Cytochrome P450 2C40	Cyp2c40	endoplasmic reticulum membrane,organelle membrane	iron ion binding,arachidonic acid epoxygenase activity,steroid hydroxylase activity,heme binding,aromatase activity	epoxygenase P450 pathway,oxidation-reduction process
C57Bl6 / alb-SREBP-1c	P84228	H32_MOUSE	P84228	P84228	-0.803087	0.803087	0.306269	3	1	-42.6878	0.573122	-1.74483	C57Bl6	alb-SREBP-1c	Histone H3.2	Hist1h3b	nuclear chromosome,chromatin,nucleosome,nuclear nucleosome,nucleus,nucleoplasm,macromolecular complex	chromatin binding,protein binding,nucleosomal DNA binding,cadherin binding,protein heterodimerization activity	negative regulation of transcription from RNA polymerase II promoter,chromatin silencing at rDNA,nucleosome assembly,DNA replication-dependent nucleosome assembly,protein heterotetramerization,regulation of gene silencing
C57Bl6 / alb-SREBP-1c	Q08460;Q08460-2;Q08460-3;Q08460-4;Q08460-5	KCMA1_MOUSE	Q08460;Q08460-2;Q08460-3;Q08460-4;Q08460-5	Q08460;Q08460-2;Q08460-3;Q08460-4;Q08460-5	-0.801354	0.801354	0.235772	3	1	-42.6189	0.573811	-1.74274	C57Bl6	alb-SREBP-1c	Calcium-activated potassium channel subunit alpha-1;Isoform 2 of Calcium-activated potassium channel subunit alpha-1;Isoform 3 of Calcium-activated potassium channel subunit alpha-1;Isoform 4 of Calcium-activated potassium channel subunit alpha-1;Isoform 5 of Calcium-activated potassium channel subunit alpha-1	Kcnma1	cytoplasm,endoplasmic reticulum,plasma membrane,caveola,voltage-gated potassium channel complex,external side of plasma membrane,integral component of membrane,apical plasma membrane,terminal bouton,postsynaptic membrane;;;;	actin binding,voltage-gated potassium channel activity,potassium channel activity,protein binding,calcium-activated potassium channel activity,identical protein binding,metal ion binding,large conductance calcium-activated potassium channel activity;;;;	response to hypoxia,potassium ion transport,response to osmotic stress,chemical synaptic transmission,sensory perception of sound,circadian rhythm,adult walking behavior,neuronal action potential,cellular potassium ion homeostasis,regulation of aldosterone metabolic process,response to carbon monoxide,regulation of ion transmembrane transport,vasodilation,regulation of membrane potential,auditory…
C57Bl6 / alb-SREBP-1c	P49429	HPPD_MOUSE	P49429	P49429	-0.798181	0.798181	1.82638e-13	123	29	-42.4926	0.575074	-1.73891	C57Bl6	alb-SREBP-1c	4-hydroxyphenylpyruvate dioxygenase	Hpd	Golgi membrane,endoplasmic reticulum,endoplasmic reticulum membrane,Golgi apparatus	4-hydroxyphenylpyruvate dioxygenase activity,metal ion binding	L-phenylalanine catabolic process,tyrosine catabolic process,oxidation-reduction process
C57Bl6 / alb-SREBP-1c	P63321	RALA_MOUSE	P63321	P63321	-0.797647	0.797647	0.134175	3	2	-42.4713	0.575287	-1.73826	C57Bl6	alb-SREBP-1c	Ras-related protein Ral-A	Rala	plasma membrane,cell surface,cytoplasmic vesicle membrane,cleavage furrow,myelin sheath,Flemming body,endocytic vesicle	GTPase activity,protein binding,GTP binding,myosin binding,GDP binding,ubiquitin protein ligase binding,Edg-2 lysophosphatidic acid receptor binding,ATPase binding	neural tube closure,exocytosis,cell cycle,Ras protein signal transduction,regulation of exocytosis,actin cytoskeleton reorganization,cell division,positive regulation of filopodium assembly,membrane raft localization
C57Bl6 / alb-SREBP-1c	P68040	RACK1_MOUSE	P68040	P68040	-0.795908	0.795908	0.0241096	20	18	-42.402	0.57598	-1.73617	C57Bl6	alb-SREBP-1c	Receptor of activated protein C kinase 1	Rack1	phagocytic cup,nucleus,nucleoplasm,cytoplasm,mitochondrion,cytosol,ribosome,dendrite,midbody,neuron projection,neuronal cell body,perikaryon,cell body,perinuclear region of cytoplasm,IRE1-RACK1-PP2A complex	protein kinase C binding,protein binding,ion channel inhibitor activity,cysteine-type endopeptidase activator activity involved in apoptotic process,enzyme binding,protein phosphatase binding,protein tyrosine kinase inhibitor activity,cyclin binding,receptor tyrosine kinase binding,signaling adaptor activity,signaling receptor activity,SH2 domain binding,protein homodimerization activity,ribosome…	positive regulation of protein phosphorylation,translation,apoptotic process,activation of cysteine-type endopeptidase activity involved in apoptotic process,cell cycle,gastrulation,protein localization,negative regulation of gene expression,protein ubiquitination,negative regulation of Wnt signaling pathway,negative regulation of cell growth,positive regulation of cell migration,positive regulat…
C57Bl6 / alb-SREBP-1c	Q99LI2	CLCC1_MOUSE	Q99LI2	Q99LI2	-0.794573	0.794573	0.436155	4	3	-42.3486	0.576514	-1.73456	C57Bl6	alb-SREBP-1c	Chloride channel CLIC-like protein 1	Clcc1	nucleus,endoplasmic reticulum,Golgi apparatus,chloride channel complex,intracellular membrane-bounded organelle	chloride channel activity	chloride transmembrane transport
C57Bl6 / alb-SREBP-1c	Q00612	G6PD1_MOUSE	Q00612	Q00612	-0.790781	0.790781	0.0647005	21	9	-42.1969	0.578031	-1.73001	C57Bl6	alb-SREBP-1c	Glucose-6-phosphate 1-dehydrogenase X	G6pdx	cytoplasm,cytosol,cytoplasmic side of plasma membrane	glucose-6-phosphate dehydrogenase activity,glucose binding,identical protein binding,protein homodimerization activity,NADP binding	cytokine production,angiotensin mediated vasoconstriction involved in regulation of systemic arterial blood pressure,vasodilation by angiotensin involved in regulation of systemic arterial blood pressure,glucose metabolic process,pentose-phosphate shunt,cholesterol biosynthetic process,NADP metabolic process,NADPH regeneration,NADP biosynthetic process,glutathione metabolic process,response to ox…
C57Bl6 / alb-SREBP-1c	Q9DBX6	CP2S1_MOUSE	Q9DBX6	Q9DBX6	-0.790569	0.790569	0.412623	3	2	-42.1884	0.578116	-1.72976	C57Bl6	alb-SREBP-1c	Cytochrome P450 2S1	Cyp2s1	endoplasmic reticulum,endoplasmic reticulum membrane,organelle membrane	iron ion binding,arachidonic acid epoxygenase activity,steroid hydroxylase activity,heme binding,aromatase activity	epoxygenase P450 pathway,oxidation-reduction process
C57Bl6 / alb-SREBP-1c	Q9QXG4	ACSA_MOUSE	Q9QXG4	Q9QXG4	-0.789631	0.789631	0.00114275	10	6	-42.1508	0.578492	-1.72863	C57Bl6	alb-SREBP-1c	Acetyl-coenzyme A synthetase, cytoplasmic	Acss2	nucleoplasm,cytoplasm,cytosol,intracellular membrane-bounded organelle	acetate-CoA ligase activity,ATP binding,AMP binding	acetyl-CoA biosynthetic process,lipid biosynthetic process,acetate biosynthetic process,acetyl-CoA biosynthetic process from acetate,propionate biosynthetic process
C57Bl6 / alb-SREBP-1c	P05784	K1C18_MOUSE	P05784	P05784	-0.788395	0.788395	2.6958e-06	36	17	-42.1012	0.578988	-1.72715	C57Bl6	alb-SREBP-1c	Keratin, type I cytoskeletal 18	Krt18	nucleolus,cytoplasm,microtubule organizing center,cytosol,intermediate filament,cell-cell adherens junction,nuclear matrix,centriolar satellite,keratin filament,cell periphery	structural molecule activity,protein binding,scaffold protein binding,cadherin binding involved in cell-cell adhesion	tumor necrosis factor-mediated signaling pathway,Golgi to plasma membrane CFTR protein transport,negative regulation of apoptotic process,intermediate filament cytoskeleton organization,extrinsic apoptotic signaling pathway,hepatocyte apoptotic process,cell-cell adhesion
C57Bl6 / alb-SREBP-1c	Q9CQD1	RAB5A_MOUSE	Q9CQD1	Q9CQD1	-0.786542	0.786542	0.00269398	14	4	-42.0268	0.579732	-1.72493	C57Bl6	alb-SREBP-1c	Ras-related protein Rab-5A	Rab5a	ruffle,cytoplasm,endosome,early endosome,cytosol,plasma membrane,synaptic vesicle,endosome membrane,actin cytoskeleton,endocytic vesicle,axon,dendrite,phagocytic vesicle membrane,somatodendritic compartment,melanosome,neuronal cell body,terminal bouton,axon terminus,membrane raft,phagocytic vesicle,cytoplasmic side of early endosome membrane	GTPase activity,protein binding,GTP binding,guanyl nucleotide binding,GDP binding	endocytosis,phagocytosis,protein transport,regulation of endocytosis,synaptic vesicle recycling,viral RNA genome replication,early endosome to late endosome transport,transcytosis,positive regulation of exocytosis,regulation of endosome size,regulation of filopodium assembly,receptor internalization involved in canonical Wnt signaling pathway,regulation of synaptic vesicle exocytosis
C57Bl6 / alb-SREBP-1c	Q6RT24	CENPE_MOUSE	Q6RT24	Q6RT24	-0.785391	0.785391	0.173378	3	1	-41.9805	0.580195	-1.72356	C57Bl6	alb-SREBP-1c	Centromere-associated protein E	Cenpe	chromosome, centromeric region,kinetochore,condensed nuclear chromosome kinetochore,condensed chromosome, centromeric region,condensed chromosome outer kinetochore,nucleus,nucleoplasm,chromosome,kinetochore microtubule,cytosol,kinesin complex,microtubule,microtubule cytoskeleton,midbody,mitotic spindle midzone	microtubule motor activity,ATP binding,microtubule binding,ATPase activity,protein kinase binding,kinetochore binding	mitotic cell cycle,microtubule-based movement,mitotic spindle organization,chromosome segregation,mitotic chromosome movement towards spindle pole,mitotic metaphase plate congression,regulation of mitotic nuclear division,mitotic spindle assembly checkpoint,multicellular organism development,attachment of spindle microtubules to kinetochore,regulation of mitotic metaphase/anaphase transition,esta…
C57Bl6 / alb-SREBP-1c	Q64373;Q64373-3;Q64373-4	B2CL1_MOUSE	Q64373;Q64373-3;Q64373-4	Q64373;Q64373-3;Q64373-4	-0.783698	0.783698	0.0155962	9	3	-41.9124	0.580876	-1.72154	C57Bl6	alb-SREBP-1c	Bcl-2-like protein 1;Isoform Bcl-X(beta) of Bcl-2-like protein 1;Isoform Bcl-X(delta-TM) of Bcl-2-like protein 1	Bcl2l1	intracellular,cytoplasm,mitochondrion,mitochondrial outer membrane,mitochondrial inner membrane,mitochondrial matrix,endoplasmic reticulum,centrosome,cytosol,membrane,integral component of membrane,cell junction,synaptic vesicle membrane,nuclear membrane,mitochondrial membrane,Bcl-2 family protein complex;;	protein binding,protein kinase binding,identical protein binding,protein homodimerization activity,protein heterodimerization activity,BH3 domain binding;;	ovarian follicle development,in utero embryonic development,release of cytochrome c from mitochondria,mitotic cell cycle checkpoint,germ cell development,spermatogenesis,cell proliferation,positive regulation of cell proliferation,male gonad development,intrinsic apoptotic signaling pathway in response to DNA damage,response to radiation,fertilization,response to virus,suppression by virus of hos…
C57Bl6 / alb-SREBP-1c	Q8K183	PDXK_MOUSE	Q8K183	Q8K183	-0.773988	0.773988	0.479305	3	2	-41.5201	0.584799	-1.70999	C57Bl6	alb-SREBP-1c	Pyridoxal kinase	Pdxk	nucleoplasm,cytosol	magnesium ion binding,ATP binding,zinc ion binding,pyridoxal kinase activity,pyridoxal phosphate binding,potassium ion binding,sodium ion binding,lithium ion binding,protein homodimerization activity	cell proliferation,pyridoxal 5'-phosphate salvage,phosphorylation,pyridoxal phosphate biosynthetic process
C57Bl6 / alb-SREBP-1c	Q64523;Q6GSS7	H2A2C_MOUSE;H2A2A_MOUSE	Q64523;Q6GSS7	Q64523;Q6GSS7	-0.760239	0.760239	0.0228467	21	6	-40.9602	0.590398	-1.69377	C57Bl6	alb-SREBP-1c	Histone H2A type 2-C;Histone H2A type 2-A	Hist2h2ac;Hist2h2aa1	nucleosome,nuclear chromatin,nucleus;nucleosome,nuclear chromatin,nucleus	DNA binding,protein heterodimerization activity;DNA binding,protein heterodimerization activity	chromatin silencing;nucleosome assembly,chromatin silencing
C57Bl6 / alb-SREBP-1c	Q9ES97;Q9ES97-2;Q9ES97-3;Q9ES97-4;Q9ES97-5	RTN3_MOUSE	Q9ES97;Q9ES97-2;Q9ES97-3;Q9ES97-4;Q9ES97-5	Q9ES97;Q9ES97-2;Q9ES97-3;Q9ES97-4;Q9ES97-5	-0.748798	0.748798	0.603481	4	2	-40.4901	0.595099	-1.68039	C57Bl6	alb-SREBP-1c	Reticulon-3;Isoform 2 of Reticulon-3;Isoform 3 of Reticulon-3;Isoform 4 of Reticulon-3;Isoform 5 of Reticulon-3	Rtn3	Golgi membrane,endoplasmic reticulum,endoplasmic reticulum membrane,integral component of membrane;;;;	protein binding;;;;	apoptotic process,vesicle-mediated transport,endoplasmic reticulum tubular network organization,endoplasmic reticulum tubular network assembly;;;;
C57Bl6 / alb-SREBP-1c	Q78PY7	SND1_MOUSE	Q78PY7	Q78PY7	-0.747428	0.747428	6.9565e-07	66	33	-40.4335	0.595665	-1.6788	C57Bl6	alb-SREBP-1c	Staphylococcal nuclease domain-containing protein 1	Snd1	nucleus,cytoplasm,mitochondrion,cytosol,RISC complex,melanosome,dense body	nucleic acid binding,nuclease activity,protein binding,cadherin binding	transcription, DNA-templated,regulation of transcription, DNA-templated,RNA catabolic process,gene silencing by RNA,nucleic acid phosphodiester bond hydrolysis
C57Bl6 / alb-SREBP-1c	Q9CYA0	CREL2_MOUSE	Q9CYA0	Q9CYA0	-0.743654	0.743654	0.0824446	4	2	-40.2775	0.597225	-1.67441	C57Bl6	alb-SREBP-1c	Cysteine-rich with EGF-like domain protein 2	Creld2	extracellular space,endoplasmic reticulum,Golgi apparatus	calcium ion binding	biological_process
C57Bl6 / alb-SREBP-1c	P02301;P84244	H3C_MOUSE;H33_MOUSE	P02301;P84244	P02301;P84244	-0.743435	0.743435	0.0101805	15	5	-40.2684	0.597316	-1.67416	C57Bl6	alb-SREBP-1c	Histone H3.3C;Histone H3.3	H3f3c;H3f3a	nucleosome,nucleus;nuclear chromosome,nuclear chromosome, telomeric region,nucleosome,nuclear nucleosome,Barr body,nucleus,nucleoplasm,macromolecular complex	nucleosomal DNA binding,protein heterodimerization activity;RNA polymerase II core promoter sequence-specific DNA binding,RNA polymerase II distal enhancer sequence-specific DNA binding,nucleosomal DNA binding,protein heterodimerization activity	nucleosome assembly;chromatin silencing at rDNA,osteoblast differentiation,nucleosome assembly,DNA replication-independent nucleosome assembly,nucleus organization,spermatogenesis,spermatid development,single fertilization,embryo implantation,cell proliferation,male gonad development,positive regulation of cell growth,pericentric heterochromatin assembly,telomeric heterochromatin assembly,multice…
C57Bl6 / alb-SREBP-1c	Q9D6K8	FUND2_MOUSE	Q9D6K8	Q9D6K8	-0.743051	0.743051	0.0563436	3	2	-40.2526	0.597474	-1.67371	C57Bl6	alb-SREBP-1c	FUN14 domain-containing protein 2	Fundc2	mitochondrion,integral component of mitochondrial outer membrane	molecular_function	mitophagy
C57Bl6 / alb-SREBP-1c	P01837	IGKC_MOUSE	P01837	P01837	-0.742044	0.742044	0.00225894	13	5	-40.2108	0.597892	-1.67254	C57Bl6	alb-SREBP-1c	Immunoglobulin kappa constant	Igkc	plasma membrane,external side of plasma membrane,immunoglobulin complex, circulating,blood microparticle	antigen binding,protein binding,immunoglobulin receptor binding	phagocytosis, recognition,phagocytosis, engulfment,complement activation, classical pathway,B cell differentiation,defense response to bacterium,innate immune response,B cell receptor signaling pathway,positive regulation of B cell activation
C57Bl6 / alb-SREBP-1c	Q9CQC6	BZW1_MOUSE	Q9CQC6	Q9CQC6	-0.740899	0.740899	0.402086	4	3	-40.1634	0.598366	-1.67122	C57Bl6	alb-SREBP-1c	Basic leucine zipper and W2 domain-containing protein 1	Bzw1	cytoplasm	cadherin binding	transcription, DNA-templated,regulation of transcription, DNA-templated
C57Bl6 / alb-SREBP-1c	Q91VR5	DDX1_MOUSE	Q91VR5	Q91VR5	-0.739562	0.739562	0.0193075	6	3	-40.1079	0.598921	-1.66967	C57Bl6	alb-SREBP-1c	ATP-dependent RNA helicase DDX1	Ddx1	nucleus,nucleoplasm,nucleolus,cytoplasm,cytosol,cytoplasmic stress granule,cleavage body,tRNA-splicing ligase complex	DNA binding,chromatin binding,transcription cofactor activity,double-stranded RNA binding,ATP-dependent RNA helicase activity,nuclease activity,exonuclease activity,protein binding,ATP binding,ATP-dependent helicase activity,poly(A) binding,DNA/RNA helicase activity	double-strand break repair,transcription, DNA-templated,regulation of transcription, DNA-templated,tRNA splicing, via endonucleolytic cleavage and ligation,mRNA processing,multicellular organism development,response to virus,RNA secondary structure unwinding,DNA duplex unwinding,response to exogenous dsRNA,nucleic acid phosphodiester bond hydrolysis,protein localization to cytoplasmic stress gran…
C57Bl6 / alb-SREBP-1c	P49586	PCY1A_MOUSE	P49586	P49586	-0.738882	0.738882	0.0368476	4	2	-40.0797	0.599203	-1.66888	C57Bl6	alb-SREBP-1c	Choline-phosphate cytidylyltransferase A	Pcyt1a	nuclear envelope,endoplasmic reticulum membrane,cytosol,plasma membrane,glycogen granule	choline-phosphate cytidylyltransferase activity,protein binding,calmodulin binding,phosphatidylcholine binding,protein homodimerization activity	phosphatidylcholine biosynthetic process,CDP-choline pathway
C57Bl6 / alb-SREBP-1c	Q9D8E6	RL4_MOUSE	Q9D8E6	Q9D8E6	-0.738434	0.738434	5.43205e-07	41	19	-40.0611	0.599389	-1.66836	C57Bl6	alb-SREBP-1c	60S ribosomal protein L4	Rpl4	nucleus,rough endoplasmic reticulum,cytosolic large ribosomal subunit	RNA binding,structural constituent of ribosome,protein binding	cytoplasmic translation
C57Bl6 / alb-SREBP-1c	Q9EPQ7	STAR5_MOUSE	Q9EPQ7	Q9EPQ7	-0.737872	0.737872	0.0824266	6	2	-40.0377	0.599623	-1.66771	C57Bl6	alb-SREBP-1c	StAR-related lipid transfer protein 5	Stard5	mitochondrion	cholesterol binding,cholesterol transporter activity,bile acid binding	cholesterol import
C57Bl6 / alb-SREBP-1c	Q8R0X7	SGPL1_MOUSE	Q8R0X7	Q8R0X7	-0.737453	0.737453	6.40907e-09	37	12	-40.0203	0.599797	-1.66723	C57Bl6	alb-SREBP-1c	Sphingosine-1-phosphate lyase 1	Sgpl1	endoplasmic reticulum,endoplasmic reticulum membrane,integral component of membrane	sphinganine-1-phosphate aldolase activity,carboxy-lyase activity,pyridoxal phosphate binding	luteinization,vasculogenesis,kidney development,fatty acid metabolic process,ceramide metabolic process,nitrogen compound metabolic process,spermatogenesis,androgen metabolic process,estrogen metabolic process,female gonad development,post-embryonic development,fibroblast migration,hemopoiesis,sphingolipid catabolic process,Leydig cell differentiation,regulation of multicellular organism growth,p…
C57Bl6 / alb-SREBP-1c	P63028	TCTP_MOUSE	P63028	P63028	-0.734356	0.734356	0.343458	3	1	-39.8914	0.601086	-1.66365	C57Bl6	alb-SREBP-1c	Translationally-controlled tumor protein	Tpt1	extracellular space,nucleus,nucleoplasm,cytoplasm,multivesicular body,cytosol,tubulin complex	calcium ion binding,protein binding,microtubule binding,transcription factor binding	spermatogenesis,stem cell population maintenance,cell differentiation,negative regulation of intrinsic apoptotic signaling pathway in response to DNA damage,negative regulation of ectoderm development
C57Bl6 / alb-SREBP-1c	Q8BM55	TM214_MOUSE	Q8BM55	Q8BM55	-0.730962	0.730962	0.0109409	31	13	-39.7498	0.602502	-1.65975	C57Bl6	alb-SREBP-1c	Transmembrane protein 214	Tmem214	endoplasmic reticulum,endoplasmic reticulum membrane,Golgi apparatus,cytosol,cytoplasmic microtubule,integral component of membrane	molecular_function	apoptotic process,biological_process
C57Bl6 / alb-SREBP-1c	Q6IRU2	TPM4_MOUSE	Q6IRU2	Q6IRU2	-0.726263	0.726263	0.32399	2	1	-39.5532	0.604468	-1.65435	C57Bl6	alb-SREBP-1c	Tropomyosin alpha-4 chain	Tpm4	stress fiber,podosome,cytoplasm,muscle thin filament tropomyosin,actin cytoskeleton,cortical cytoskeleton,filamentous actin	structural constituent of muscle,identical protein binding,protein homodimerization activity,metal ion binding,protein heterodimerization activity,actin filament binding	muscle contraction,actin filament organization
C57Bl6 / alb-SREBP-1c	P61979;P61979-2;P61979-3	HNRPK_MOUSE	P61979;P61979-2;P61979-3	P61979;P61979-2;P61979-3	-0.724443	0.724443	0.0606545	11	4	-39.4769	0.605231	-1.65226	C57Bl6	alb-SREBP-1c	Heterogeneous nuclear ribonucleoprotein K;Isoform 2 of Heterogeneous nuclear ribonucleoprotein K;Isoform 3 of Heterogeneous nuclear ribonucleoprotein K	Hnrnpk	nuclear chromatin,podosome,nucleoplasm,cell junction,cell projection,catalytic step 2 spliceosome,cytoplasmic stress granule;;	RNA polymerase II core promoter proximal region sequence-specific DNA binding,transcriptional activator activity, RNA polymerase II core promoter proximal region sequence-specific binding,RNA binding,protein binding,protein domain specific binding,identical protein binding,cadherin binding;;	transcription from RNA polymerase II promoter,mRNA processing,RNA splicing,regulation of low-density lipoprotein particle clearance,negative regulation of apoptotic process,positive regulation of low-density lipoprotein particle receptor biosynthetic process,positive regulation of transcription from RNA polymerase II promoter,negative regulation of mRNA splicing, via spliceosome,positive regulati…
C57Bl6 / alb-SREBP-1c	Q9CZX9	EMC4_MOUSE	Q9CZX9	Q9CZX9	-0.724327	0.724327	0.0079868	7	4	-39.472	0.60528	-1.65213	C57Bl6	alb-SREBP-1c	ER membrane protein complex subunit 4	Emc4	integral component of membrane,ER membrane protein complex	molecular_function	apoptotic process,protein folding in endoplasmic reticulum
C57Bl6 / alb-SREBP-1c	Q9CQU3	RER1_MOUSE	Q9CQU3	Q9CQU3	-0.723579	0.723579	0.0464743	3	1	-39.4407	0.605593	-1.65127	C57Bl6	alb-SREBP-1c	Protein RER1	Rer1	endoplasmic reticulum-Golgi intermediate compartment,Golgi apparatus,plasma membrane,cell surface,integral component of Golgi membrane	acetylcholine receptor binding	retrograde vesicle-mediated transport, Golgi to ER,neuromuscular junction development,skeletal muscle acetylcholine-gated channel clustering,positive regulation of protein localization to plasma membrane
C57Bl6 / alb-SREBP-1c	Q9Z2X1;Q9Z2X1-2	HNRPF_MOUSE	Q9Z2X1;Q9Z2X1-2	Q9Z2X1;Q9Z2X1-2	-0.720502	0.720502	0.285481	4	3	-39.3114	0.606886	-1.64775	C57Bl6	alb-SREBP-1c	Heterogeneous nuclear ribonucleoprotein F;Isoform 2 of Heterogeneous nuclear ribonucleoprotein F	Hnrnpf	nucleoplasm,cytosol,catalytic step 2 spliceosome;	single-stranded RNA binding;	mRNA processing,RNA splicing,regulation of RNA splicing;
C57Bl6 / alb-SREBP-1c	P56371	RAB4A_MOUSE	P56371	P56371	-0.719805	0.719805	0.0100838	3	1	-39.2821	0.607179	-1.64696	C57Bl6	alb-SREBP-1c	Ras-related protein Rab-4A	Rab4a	cytoplasm,endosome,cytosol,plasma membrane,cytoplasmic vesicle membrane,early endosome membrane,vesicle,insulin-responsive compartment,intracellular membrane-bounded organelle,perinuclear region of cytoplasm,recycling endosome,recycling endosome membrane,extracellular exosome,postsynaptic recycling endosome	ATPase activator activity,GTPase activity,protein binding,GTP binding,protein transporter activity,GDP binding,ATPase binding	protein transport,antigen processing and presentation,regulation of endocytosis,Rab protein signal transduction,positive regulation of ATPase activity
C57Bl6 / alb-SREBP-1c	P60867	RS20_MOUSE	P60867	P60867	-0.716525	0.716525	0.00222871	12	5	-39.1439	0.608561	-1.64322	C57Bl6	alb-SREBP-1c	40S ribosomal protein S20	Rps20	cytosolic small ribosomal subunit	RNA binding,structural constituent of ribosome	cytoplasmic translation
C57Bl6 / alb-SREBP-1c	Q9CQZ0	ORML2_MOUSE	Q9CQZ0	Q9CQZ0	-0.711892	0.711892	0.053854	6	3	-38.9481	0.610519	-1.63795	C57Bl6	alb-SREBP-1c	ORM1-like protein 2	Ormdl2	endoplasmic reticulum,integral component of membrane,SPOTS complex	molecular_function	ceramide metabolic process,cellular sphingolipid homeostasis,negative regulation of ceramide biosynthetic process
C57Bl6 / alb-SREBP-1c	P20152	VIME_MOUSE	P20152	P20152	-0.707825	0.707825	0.0996294	20	11	-38.7757	0.612243	-1.63334	C57Bl6	alb-SREBP-1c	Vimentin	Vim	cytoplasm,peroxisome,cytosol,polysome,cytoskeleton,intermediate filament,plasma membrane,cell leading edge,cell projection,neuron projection,type III intermediate filament,phagocytic vesicle	double-stranded RNA binding,structural molecule activity,structural constituent of cytoskeleton,structural constituent of eye lens,protein binding,protein C-terminus binding,protein domain specific binding,identical protein binding,scaffold protein binding,keratin filament binding	positive regulation of gene expression,negative regulation of neuron projection development,astrocyte development,positive regulation of collagen biosynthetic process,regulation of mRNA stability,intermediate filament-based process,intermediate filament organization,positive regulation of translation,Bergmann glial cell differentiation,SMAD protein signal transduction,lens fiber cell development,…
C57Bl6 / alb-SREBP-1c	P63073	IF4E_MOUSE	P63073	P63073	-0.707615	0.707615	0.438989	3	1	-38.7668	0.612332	-1.6331	C57Bl6	alb-SREBP-1c	Eukaryotic translation initiation factor 4E	Eif4e	cytoplasmic mRNA processing body,cytoplasm,cytosol,mRNA cap binding complex,cytoplasmic stress granule,eukaryotic translation initiation factor 4F complex,RISC complex,chromatoid body,cytoplasmic ribonucleoprotein granule,perinuclear region of cytoplasm	RNA 7-methylguanosine cap binding,translation initiation factor activity,protein binding,enzyme binding,eukaryotic initiation factor 4G binding,repressing transcription factor binding	G1/S transition of mitotic cell cycle,behavioral fear response,translational initiation,regulation of translation,negative regulation of translation,stem cell population maintenance,lung development,negative regulation of neuron differentiation,positive regulation of mitotic cell cycle,cellular response to dexamethasone stimulus
C57Bl6 / alb-SREBP-1c	P13516	ACOD1_MOUSE	P13516	P13516	-0.7056	0.7056	0.000167361	22	8	-38.6813	0.613187	-1.63082	C57Bl6	alb-SREBP-1c	Acyl-CoA desaturase 1	Scd1	nucleolus,endoplasmic reticulum,endoplasmic reticulum membrane,integral component of membrane,integral component of endoplasmic reticulum membrane,organelle membrane	stearoyl-CoA 9-desaturase activity,iron ion binding,oxidoreductase activity,palmitoyl-CoA 9-desaturase activity,metal ion binding	fatty acid biosynthetic process,unsaturated fatty acid biosynthetic process,triglyceride metabolic process,positive regulation of cholesterol esterification,regulation of water loss via skin,sterol esterification,cholesterol esterification,negative regulation of growth of symbiont in host,sebaceous gland development,defense response to Gram-positive bacterium,white fat cell differentiation,brown …
C57Bl6 / alb-SREBP-1c	Q5BL07	PEX1_MOUSE	Q5BL07	Q5BL07	-0.704791	0.704791	1.08914e-40	261	67	-38.6469	0.613531	-1.62991	C57Bl6	alb-SREBP-1c	Peroxisome biogenesis factor 1	Pex1	cytoplasm,peroxisome,peroxisomal membrane,cytosol	ATP binding,protein C-terminus binding,lipid binding,ATPase activity, coupled,macromolecular complex binding	protein targeting to peroxisome,peroxisome organization,protein import into peroxisome matrix,microtubule-based peroxisome localization
C57Bl6 / alb-SREBP-1c	Q5NCC3	TRI41_MOUSE	Q5NCC3	Q5NCC3	-0.704664	0.704664	0.438363	2	1	-38.6415	0.613585	-1.62977	C57Bl6	alb-SREBP-1c	E3 ubiquitin-protein ligase TRIM41	Trim41	nucleolus,cytoplasm,nuclear body	protein binding,zinc ion binding,transferase activity,identical protein binding	biological_process,protein ubiquitination
C57Bl6 / alb-SREBP-1c	P63323	RS12_MOUSE	P63323	P63323	-0.695906	0.695906	0.196478	3	1	-38.2679	0.617321	-1.6199	C57Bl6	alb-SREBP-1c	40S ribosomal protein S12	Rps12	Golgi apparatus,cytosol,cytosolic small ribosomal subunit,intracellular membrane-bounded organelle	structural constituent of ribosome	translation
C57Bl6 / alb-SREBP-1c	P14869	RLA0_MOUSE	P14869	P14869	-0.694377	0.694377	1.62176e-13	48	15	-38.2024	0.617976	-1.61819	C57Bl6	alb-SREBP-1c	60S acidic ribosomal protein P0	Rplp0	nucleus,cytoplasm,endoplasmic reticulum,cytosol,cytosolic large ribosomal subunit,dendrite,cytoplasmic ribonucleoprotein granule,ribonucleoprotein complex	structural constituent of ribosome	ribosome biogenesis,cellular response to interleukin-4
C57Bl6 / alb-SREBP-1c	P97493	THIOM_MOUSE	P97493	P97493	-0.69146	0.69146	0.34217	3	5	-38.0773	0.619227	-1.61492	C57Bl6	alb-SREBP-1c	Thioredoxin, mitochondrial	Txn2	nucleolus,mitochondrion,dendrite,neuronal cell body	peptide-methionine (S)-S-oxide reductase activity,protein disulfide oxidoreductase activity,peptide-methionine (R)-S-oxide reductase activity	response to hypoxia,glycerol ether metabolic process,response to oxidative stress,response to hormone,response to glucose,response to organic cyclic compound,cellular response to nutrient levels,response to drug,cell redox homeostasis,response to axon injury,oxidation-reduction process
C57Bl6 / alb-SREBP-1c	Q99LM2	CK5P3_MOUSE	Q99LM2	Q99LM2	-0.689099	0.689099	0.342036	3	1	-37.9759	0.620241	-1.61228	C57Bl6	alb-SREBP-1c	CDK5 regulatory subunit-associated protein 3	Cdk5rap3	cellular_component,nucleus,nucleolus,cytoplasm,centrosome,cytosol,endomembrane system,macromolecular complex,microtubule	protein binding,protein kinase binding,cyclin binding,ubiquitin-like protein ligase binding,mitogen-activated protein kinase binding,NF-kappaB binding,MDM2/MDM4 family protein binding	regulation of cyclin-dependent protein serine/threonine kinase activity,negative regulation of protein phosphorylation,mitotic G2 DNA damage checkpoint,regulation of mitotic cell cycle,cell proliferation,regulation of phosphatase activity,apoptotic nuclear changes,endoplasmic reticulum unfolded protein response,positive regulation of protein ubiquitination,negative regulation of NF-kappaB transcr…
C57Bl6 / alb-SREBP-1c	P59325	IF5_MOUSE	P59325	P59325	-0.686973	0.686973	0.30556	2	1	-37.8844	0.621156	-1.6099	C57Bl6	alb-SREBP-1c	Eukaryotic translation initiation factor 5	Eif5	cytoplasm,cytosol,plasma membrane	translation initiation factor activity,GTP binding,cadherin binding,eukaryotic initiation factor eIF2 binding	formation of translation preinitiation complex,regulation of translational initiation,activation of GTPase activity
C57Bl6 / alb-SREBP-1c	Q91V04	TRAM1_MOUSE	Q91V04	Q91V04	-0.6841	0.6841	0.134397	7	4	-37.7606	0.622394	-1.6067	C57Bl6	alb-SREBP-1c	Translocating chain-associated membrane protein 1	Tram1	endoplasmic reticulum,endoplasmic reticulum membrane,integral component of membrane	molecular_function	protein transport
C57Bl6 / alb-SREBP-1c	P61211	ARL1_MOUSE	P61211	P61211	-0.683861	0.683861	0.0579197	6	1	-37.7503	0.622497	-1.60643	C57Bl6	alb-SREBP-1c	ADP-ribosylation factor-like protein 1	Arl1	Golgi membrane,cytoplasm,Golgi apparatus,trans-Golgi network,cytosol	GTPase activity,GTP binding,enzyme activator activity,protein domain specific binding,metal ion binding	Golgi organization,toxin metabolic process,activation of phospholipase D activity,protein localization to Golgi apparatus,retrograde transport, endosome to Golgi,Golgi vesicle transport
C57Bl6 / alb-SREBP-1c	P10126	EF1A1_MOUSE	P10126	P10126	-0.683317	0.683317	1.44992e-18	102	23	-37.7268	0.622732	-1.60583	C57Bl6	alb-SREBP-1c	Elongation factor 1-alpha 1	Eef1a1	nucleus,nucleolus,cytoplasm,cytosol,plasma membrane,cortical actin cytoskeleton,ruffle membrane,myelin sheath	tRNA binding,translation elongation factor activity,GTPase activity,protein binding,calmodulin binding,GTP binding,protein kinase binding	translational elongation,cellular response to epidermal growth factor stimulus
C57Bl6 / alb-SREBP-1c	P97501	FMO3_MOUSE	P97501	P97501	-0.681789	0.681789	0.52681	8	26	-37.6608	0.623392	-1.60413	C57Bl6	alb-SREBP-1c	Dimethylaniline monooxygenase [N-oxide-forming] 3	Fmo3	endoplasmic reticulum membrane,integral component of membrane,organelle membrane	monooxygenase activity,N,N-dimethylaniline monooxygenase activity,trimethylamine monooxygenase activity,flavin adenine dinucleotide binding,NADP binding	oxidation-reduction process
C57Bl6 / alb-SREBP-1c	Q9DCL9	PUR6_MOUSE	Q9DCL9	Q9DCL9	-0.681376	0.681376	0.0370097	66	21	-37.643	0.62357	-1.60367	C57Bl6	alb-SREBP-1c	Multifunctional protein ADE2	Paics	cytoplasm	phosphoribosylaminoimidazole carboxylase activity,phosphoribosylaminoimidazolesuccinocarboxamide synthase activity,ATP binding,identical protein binding,cadherin binding	'de novo' IMP biosynthetic process
C57Bl6 / alb-SREBP-1c	P40142	TKT_MOUSE	P40142	P40142	-0.67837	0.67837	0.0172278	34	14	-37.5129	0.624871	-1.60033	C57Bl6	alb-SREBP-1c	Transketolase	Tkt	nucleoplasm,nuclear body,nuclear speck,myelin sheath	transketolase activity,protein homodimerization activity,metal ion binding,cofactor binding	regulation of growth,glyceraldehyde-3-phosphate biosynthetic process
C57Bl6 / alb-SREBP-1c	Q9Z211	PX11A_MOUSE	Q9Z211	Q9Z211	-0.678161	0.678161	0.000698971	65	16	-37.5039	0.624961	-1.6001	C57Bl6	alb-SREBP-1c	Peroxisomal membrane protein 11A	Pex11a	peroxisome,peroxisomal membrane,integral component of peroxisomal membrane,macromolecular complex	protein homodimerization activity	peroxisome organization,signal transduction,peroxisome membrane biogenesis,peroxisome fission,regulation of peroxisome size,brown fat cell differentiation
C57Bl6 / alb-SREBP-1c	P19253	RL13A_MOUSE	P19253	P19253	-0.675946	0.675946	0.232176	15	5	-37.4078	0.625922	-1.59764	C57Bl6	alb-SREBP-1c	60S ribosomal protein L13a	Rpl13a	cytosolic large ribosomal subunit,GAIT complex	mRNA binding,structural constituent of ribosome	translation,negative regulation of translation,response to lipopolysaccharide,homeostatic process,macrophage chemotaxis,lung morphogenesis,cellular response to interferon-gamma,negative regulation of formation of translation preinitiation complex
C57Bl6 / alb-SREBP-1c	P35700	PRDX1_MOUSE	P35700	P35700	-0.673787	0.673787	2.16009e-15	73	18	-37.3141	0.626859	-1.59525	C57Bl6	alb-SREBP-1c	Peroxiredoxin-1	Prdx1	nucleus,cytoplasm,mitochondrion,cytosol,myelin sheath	peroxidase activity,protein binding,thioredoxin peroxidase activity,identical protein binding,cadherin binding	response to reactive oxygen species,response to oxidative stress,cell proliferation,removal of superoxide radicals,natural killer cell activation,regulation of stress-activated MAPK cascade,erythrocyte homeostasis,natural killer cell mediated cytotoxicity,hydrogen peroxide catabolic process,cell redox homeostasis,oxidation-reduction process,regulation of NIK/NF-kappaB signaling
C57Bl6 / alb-SREBP-1c	Q99LC9	PEX6_MOUSE	Q99LC9	Q99LC9	-0.67232	0.67232	3.41431e-21	187	47	-37.2503	0.627497	-1.59363	C57Bl6	alb-SREBP-1c	Peroxisome assembly factor 2	Pex6	photoreceptor outer segment,cytoplasm,peroxisome,peroxisomal membrane,cytosol,Requires Ontology	protein binding,ATP binding,protein C-terminus binding,ATPase activity,ATPase activity, coupled,macromolecular complex binding	protein targeting to peroxisome,peroxisome organization,protein import into peroxisome matrix, translocation,protein stabilization
C57Bl6 / alb-SREBP-1c	O35490	BHMT1_MOUSE	O35490	O35490	-0.672173	0.672173	8.34533e-14	131	27	-37.2439	0.627561	-1.59347	C57Bl6	alb-SREBP-1c	Betaine--homocysteine S-methyltransferase 1	Bhmt	cytosol,extracellular exosome	zinc ion binding,betaine-homocysteine S-methyltransferase activity	amino-acid betaine metabolic process,amino-acid betaine catabolic process,methionine biosynthetic process,methylation,L-methionine salvage
C57Bl6 / alb-SREBP-1c	P28653	PGS1_MOUSE	P28653	P28653	-0.672032	0.672032	0.307646	4	2	-37.2378	0.627622	-1.59332	C57Bl6	alb-SREBP-1c	Biglycan	Bgn	extracellular region,proteinaceous extracellular matrix,extracellular space,intracellular,cytoplasm,cell surface,transport vesicle,extracellular matrix,sarcolemma	protein kinase inhibitor activity,glycosaminoglycan binding,extracellular matrix binding	blood vessel remodeling,negative regulation of protein kinase activity,cytokine-mediated signaling pathway,peptide cross-linking via chondroitin 4-sulfate glycosaminoglycan,negative regulation of JAK-STAT cascade
C57Bl6 / alb-SREBP-1c	Q9D517	PLCC_MOUSE	Q9D517	Q9D517	-0.671778	0.671778	0.140222	8	4	-37.2267	0.627733	-1.59303	C57Bl6	alb-SREBP-1c	1-acyl-sn-glycerol-3-phosphate acyltransferase gamma	Agpat3	nuclear envelope,endoplasmic reticulum,endoplasmic reticulum membrane,integral component of membrane	1-acylglycerol-3-phosphate O-acyltransferase activity,lysophosphatidic acid acyltransferase activity	CDP-diacylglycerol biosynthetic process
C57Bl6 / alb-SREBP-1c	Q9JMD3	STA10_MOUSE	Q9JMD3	Q9JMD3	-0.670399	0.670399	0.00162485	26	9	-37.1667	0.628333	-1.59151	C57Bl6	alb-SREBP-1c	START domain-containing protein 10	Stard10	cytosol,microvillus,membrane,motile cilium,intercellular canaliculus	lipid binding	lipid transport,bile acid secretion,positive regulation of peroxisome proliferator activated receptor signaling pathway
C57Bl6 / alb-SREBP-1c	Q9D8B6	F210B_MOUSE	Q9D8B6	Q9D8B6	-0.670363	0.670363	0.129492	5	4	-37.1651	0.628349	-1.59147	C57Bl6	alb-SREBP-1c	Protein FAM210B, mitochondrial	Fam210b	mitochondrial outer membrane,integral component of membrane,intrinsic component of membrane	molecular_function	erythrocyte maturation,positive regulation of erythrocyte differentiation,cellular response to estradiol stimulus
C57Bl6 / alb-SREBP-1c	Q8K010	OPLA_MOUSE	Q8K010	Q8K010	-0.670165	0.670165	0.385163	2	2	-37.1565	0.628435	-1.59126	C57Bl6	alb-SREBP-1c	5-oxoprolinase	Oplah	cytosol	ATP binding,5-oxoprolinase (ATP-hydrolyzing) activity	glutathione metabolic process
C57Bl6 / alb-SREBP-1c	Q9WVJ2	PSD13_MOUSE	Q9WVJ2	Q9WVJ2	-0.669304	0.669304	0.123543	8	4	-37.119	0.62881	-1.59031	C57Bl6	alb-SREBP-1c	26S proteasome non-ATPase regulatory subunit 13	Psmd13	proteasome complex,nucleus,cytosol,proteasome regulatory particle,proteasome regulatory particle, lid subcomplex,proteasome accessory complex	endopeptidase activity,structural molecule activity	ubiquitin-dependent protein catabolic process,meiosis I,proteasome assembly
C57Bl6 / alb-SREBP-1c	P84104;P84104-2	SRSF3_MOUSE	P84104;P84104-2	P84104;P84104-2	-0.668757	0.668757	0.231041	3	1	-37.0951	0.629049	-1.5897	C57Bl6	alb-SREBP-1c	Serine/arginine-rich splicing factor 3;Isoform Short of Serine/arginine-rich splicing factor 3	Srsf3	cytoplasm,nuclear speck;	RNA binding,phospholipase binding;	mRNA processing,insulin receptor signaling pathway,RNA splicing,regulation of mRNA splicing, via spliceosome,mRNA transport,cellular response to leukemia inhibitory factor;
C57Bl6 / alb-SREBP-1c	Q8VHE0	SEC63_MOUSE	Q8VHE0	Q8VHE0	-0.668139	0.668139	0.000698971	28	13	-37.0682	0.629318	-1.58902	C57Bl6	alb-SREBP-1c	Translocation protein SEC63 homolog	Sec63	endoplasmic reticulum,membrane,integral component of endoplasmic reticulum membrane		liver development,SRP-dependent cotranslational protein targeting to membrane,posttranslational protein targeting to membrane,nitrogen compound metabolic process,multicellular organism aging,posttranslational protein targeting to membrane, translocation,renal system development
C57Bl6 / alb-SREBP-1c	P97865	PEX7_MOUSE	P97865	P97865	-0.667994	0.667994	4.00252e-07	31	9	-37.0619	0.629381	-1.58886	C57Bl6	alb-SREBP-1c	Peroxisomal targeting signal 2 receptor	Pex7	peroxisome,peroxisomal matrix,cytosol	peroxisome matrix targeting signal-2 binding,enzyme binding,protein homodimerization activity	neuron migration,endochondral ossification,protein targeting to peroxisome,fatty acid beta-oxidation,peroxisome organization,ether lipid biosynthetic process,protein import into peroxisome matrix
C57Bl6 / alb-SREBP-1c	Q99MZ7	PECR_MOUSE	Q99MZ7	Q99MZ7	-0.664695	0.664695	3.77468e-07	116	21	-36.9178	0.630822	-1.58523	C57Bl6	alb-SREBP-1c	Peroxisomal trans-2-enoyl-CoA reductase	Pecr	mitochondrion,peroxisome,peroxisomal membrane,intracellular membrane-bounded organelle	receptor binding,trans-2-enoyl-CoA reductase (NADPH) activity	fatty acid elongation,phytol metabolic process,oxidation-reduction process
C57Bl6 / alb-SREBP-1c	Q6NXH9	K2C73_MOUSE	Q6NXH9	Q6NXH9	-0.662863	0.662863	0.0308519	9	4	-36.8376	0.631624	-1.58322	C57Bl6	alb-SREBP-1c	Keratin, type II cytoskeletal 73	Krt73	keratin filament	structural molecule activity
C57Bl6 / alb-SREBP-1c	Q9CY27	TECR_MOUSE	Q9CY27	Q9CY27	-0.657113	0.657113	1.61182e-07	42	14	-36.5854	0.634146	-1.57692	C57Bl6	alb-SREBP-1c	Very-long-chain enoyl-CoA reductase	Tecr	endoplasmic reticulum,integral component of endoplasmic reticulum membrane	oxidoreductase activity,Requires Ontology	steroid biosynthetic process,fatty acid elongation,very long-chain fatty acid biosynthetic process,oxidation-reduction process
C57Bl6 / alb-SREBP-1c	Q3U1J4	DDB1_MOUSE	Q3U1J4	Q3U1J4	-0.655095	0.655095	1.21983e-15	53	21	-36.4966	0.635034	-1.57472	C57Bl6	alb-SREBP-1c	DNA damage-binding protein 1	Ddb1	nucleus,nucleoplasm,cytoplasm,cullin-RING ubiquitin ligase complex,Cul4A-RING E3 ubiquitin ligase complex,Cul4B-RING E3 ubiquitin ligase complex,macromolecular complex,Cul4-RING E3 ubiquitin ligase complex	damaged DNA binding,protein binding,protein binding, bridging,macromolecular complex binding,WD40-repeat domain binding,cullin family protein binding	nucleotide-excision repair,ubiquitin-dependent protein catabolic process,cellular response to DNA damage stimulus,proteasomal protein catabolic process,Wnt signaling pathway,protein ubiquitination,histone H2A monoubiquitination,negative regulation of apoptotic process,proteasome-mediated ubiquitin-dependent protein catabolic process,positive regulation of viral genome replication,positive regulat…
C57Bl6 / alb-SREBP-1c	Q9CWU0	TDR12_MOUSE	Q9CWU0	Q9CWU0	-0.651621	0.651621	0.425281	3	1	-36.3435	0.636565	-1.57093	C57Bl6	alb-SREBP-1c	Putative ATP-dependent RNA helicase TDRD12	Tdrd12	cytosol,PET complex	nucleic acid binding,helicase activity,ATP binding	male meiosis,multicellular organism development,spermatogenesis,fertilization,cell differentiation,gene silencing by RNA,piRNA metabolic process,DNA methylation involved in gamete generation
C57Bl6 / alb-SREBP-1c	O35423	SPYA_MOUSE	O35423	O35423	-0.649021	0.649021	0.305166	128	25	-36.2287	0.637713	-1.5681	C57Bl6	alb-SREBP-1c	Serine--pyruvate aminotransferase, mitochondrial	Agxt	mitochondrion,mitochondrial matrix,peroxisome,peroxisomal matrix,intracellular membrane-bounded organelle	serine-pyruvate transaminase activity,receptor binding,alanine-glyoxylate transaminase activity,transaminase activity,amino acid binding,pyridoxal phosphate binding,identical protein binding,protein homodimerization activity,protein self-association	Notch signaling pathway,glyoxylate catabolic process,glycine biosynthetic process, by transamination of glyoxylate,L-cysteine catabolic process,L-alanine catabolic process,pyruvate biosynthetic process,glyoxylate metabolic process,oxalic acid secretion,response to glucocorticoid,response to cAMP
C57Bl6 / alb-SREBP-1c	Q9CQA6	CHCH1_MOUSE	Q9CQA6	Q9CQA6	-0.646483	0.646483	0.549385	2	1	-36.1164	0.638836	-1.56535	C57Bl6	alb-SREBP-1c	Coiled-coil-helix-coiled-coil-helix domain-containing protein 1	Chchd1	fibrillar center,nucleoplasm,mitochondrion,mitochondrial ribosome,cytosol		biological_process,mitochondrial translation
C57Bl6 / alb-SREBP-1c	P35576	G6PC_MOUSE	P35576	P35576	-0.646212	0.646212	8.44871e-08	39	9	-36.1044	0.638956	-1.56505	C57Bl6	alb-SREBP-1c	Glucose-6-phosphatase	G6pc	endoplasmic reticulum,integral component of membrane,integral component of endoplasmic reticulum membrane	glucose-6-phosphatase activity,phosphotransferase activity, alcohol group as acceptor,phosphate ion binding	glycogen metabolic process,glycogen catabolic process,gluconeogenesis,triglyceride metabolic process,steroid metabolic process,regulation of gene expression,glucose-6-phosphate transport,response to food,multicellular organism growth,glucose homeostasis,cholesterol homeostasis,urate metabolic process,phosphorylated carbohydrate dephosphorylation,glucose 6-phosphate metabolic process
C57Bl6 / alb-SREBP-1c	Q6ZWY3	RS27L_MOUSE	Q6ZWY3	Q6ZWY3	-0.645358	0.645358	0.541157	3	3	-36.0666	0.639334	-1.56413	C57Bl6	alb-SREBP-1c	40S ribosomal protein S27-like	Rps27l	nucleus,cytosolic small ribosomal subunit	structural constituent of ribosome,translation activator activity,cysteine-type endopeptidase activator activity involved in apoptotic process,metal ion binding	ribosomal small subunit assembly,translation,activation of cysteine-type endopeptidase activity involved in apoptotic process,DNA damage response, signal transduction by p53 class mediator resulting in transcription of p21 class mediator,mitotic G1 DNA damage checkpoint,intrinsic apoptotic signaling pathway in response to DNA damage by p53 class mediator,positive regulation of translation
C57Bl6 / alb-SREBP-1c	P59240	NPHP4_MOUSE	P59240	P59240	-0.641228	0.641228	0.499495	3	1	-35.8833	0.641167	-1.55966	C57Bl6	alb-SREBP-1c	Nephrocystin-4	Nphp4	cytoplasm,centrosome,cell-cell junction,bicellular tight junction,photoreceptor connecting cilium,ciliary transition zone,ciliary basal body,ribbon synapse,ciliary base	protein binding	flagellated sperm motility,photoreceptor cell outer segment organization,photoreceptor cell maintenance,retina development in camera-type eye,negative regulation of canonical Wnt signaling pathway,positive regulation of bicellular tight junction assembly
C57Bl6 / alb-SREBP-1c	Q8BH79;Q8BH79-2;Q8BH79-3;Q8BH79-4	ANO10_MOUSE	Q8BH79;Q8BH79-2;Q8BH79-3;Q8BH79-4	Q8BH79;Q8BH79-2;Q8BH79-3;Q8BH79-4	-0.639905	0.639905	0.494603	2	1	-35.8245	0.641755	-1.55823	C57Bl6	alb-SREBP-1c	Anoctamin-10;Isoform 2 of Anoctamin-10;Isoform 3 of Anoctamin-10;Isoform 4 of Anoctamin-10	Ano10	intracellular,plasma membrane,integral component of membrane;;;	calcium activated cation channel activity,intracellular calcium activated chloride channel activity;;;	cation transport,chloride transport,ion transmembrane transport;;;
C57Bl6 / alb-SREBP-1c	P47955	RLA1_MOUSE	P47955	P47955	-0.635933	0.635933	0.0679676	5	2	-35.6475	0.643525	-1.55394	C57Bl6	alb-SREBP-1c	60S acidic ribosomal protein P1	Rplp1	cytosolic large ribosomal subunit	structural constituent of ribosome,protein kinase activator activity	cytoplasmic translation,translational elongation,regulation of translation,activation of protein kinase activity,positive regulation of protein kinase activity
C57Bl6 / alb-SREBP-1c	P23506;P23506-2	PIMT_MOUSE	P23506;P23506-2	P23506;P23506-2	-0.634732	0.634732	0.291587	3	2	-35.594	0.64406	-1.55265	C57Bl6	alb-SREBP-1c	Protein-L-isoaspartate(D-aspartate) O-methyltransferase;Isoform 2 of Protein-L-isoaspartate(D-aspartate) O-methyltransferase	Pcmt1	cytoplasm;	protein-L-isoaspartate (D-aspartate) O-methyltransferase activity;	protein methylation;
C57Bl6 / alb-SREBP-1c	Q6PDM2	SRSF1_MOUSE	Q6PDM2	Q6PDM2	-0.63074	0.63074	0.000179771	23	8	-35.4155	0.645845	-1.54836	C57Bl6	alb-SREBP-1c	Serine/arginine-rich splicing factor 1	Srsf1	nucleus,nucleoplasm,cytoplasm,nuclear speck,catalytic step 2 spliceosome,exon-exon junction complex	RNA binding,mRNA binding,protein binding,DNA topoisomerase binding,RS domain binding	alternative mRNA splicing, via spliceosome,mRNA 5'-splice site recognition,in utero embryonic development,RNA splicing,positive regulation of RNA splicing,oligodendrocyte differentiation,mRNA transport,cardiac muscle contraction,liver regeneration
C57Bl6 / alb-SREBP-1c	Q62264	THRSP_MOUSE	Q62264	Q62264	-0.62821	0.62821	0.285995	6	2	-35.3022	0.646978	-1.54565	C57Bl6	alb-SREBP-1c	Thyroid hormone-inducible hepatic protein	Thrsp	nucleoplasm,cytosol	protein binding,identical protein binding,protein homodimerization activity	transcription, DNA-templated,regulation of transcription, DNA-templated,lipid metabolic process,regulation of triglyceride biosynthetic process,regulation of lipid biosynthetic process
C57Bl6 / alb-SREBP-1c	Q922Z0	OXDD_MOUSE	Q922Z0	Q922Z0	-0.623369	0.623369	0.60166	22	9	-35.0847	0.649153	-1.54047	C57Bl6	alb-SREBP-1c	D-aspartate oxidase	Ddo	peroxisome,cytosol	receptor binding,D-aspartate oxidase activity,cofactor binding,FAD binding	aspartate metabolic process,aspartate catabolic process,insemination,grooming behavior,D-amino acid catabolic process,hormone metabolic process,oxidation-reduction process
C57Bl6 / alb-SREBP-1c	Q6NZL6	TONSL_MOUSE	Q6NZL6	Q6NZL6	-0.621906	0.621906	0.305295	3	1	-35.0188	0.649812	-1.53891	C57Bl6	alb-SREBP-1c	Tonsoku-like protein	Tonsl	nucleoplasm,cytoplasm,nuclear body,nuclear replication fork,DNA replication factor A complex,FACT complex,MCM complex	histone binding	double-strand break repair via homologous recombination,replication fork processing
C57Bl6 / alb-SREBP-1c	O35678	MGLL_MOUSE	O35678	O35678	-0.621345	0.621345	0.185405	9	4	-34.9935	0.650065	-1.53831	C57Bl6	alb-SREBP-1c	Monoglyceride lipase	Mgll	nucleoplasm,cytosol,extrinsic component of membrane,axon,varicosity,synapse	protein homodimerization activity,acylglycerol lipase activity	fatty acid biosynthetic process,regulation of signal transduction,arachidonic acid metabolic process,triglyceride catabolic process,regulation of axon extension,acylglycerol catabolic process,regulation of inflammatory response,regulation of sensory perception of pain,long term synaptic depression,regulation of endocannabinoid signaling pathway
C57Bl6 / alb-SREBP-1c	Q9Z0R9	FADS2_MOUSE	Q9Z0R9	Q9Z0R9	-0.615855	0.615855	0.00212337	27	9	-34.7457	0.652543	-1.53247	C57Bl6	alb-SREBP-1c	Fatty acid desaturase 2	Fads2	endoplasmic reticulum membrane,membrane,integral component of membrane	stearoyl-CoA 9-desaturase activity	unsaturated fatty acid biosynthetic process,oxidation-reduction process
C57Bl6 / alb-SREBP-1c	P23116	EIF3A_MOUSE	P23116	P23116	-0.613294	0.613294	0.431538	6	6	-34.6297	0.653703	-1.52975	C57Bl6	alb-SREBP-1c	Eukaryotic translation initiation factor 3 subunit A	Eif3a	nucleus,nucleolus,microtubule organizing center,cytosol,eukaryotic translation initiation factor 3 complex,microtubule,multi-eIF complex,eukaryotic translation initiation factor 3 complex, eIF3e,eukaryotic translation initiation factor 3 complex, eIF3m	RNA binding,mRNA binding,protein binding,translation initiation factor activity	formation of cytoplasmic translation initiation complex,translation reinitiation,negative regulation of ERK1 and ERK2 cascade,IRES-dependent viral translational initiation,viral translational termination-reinitiation
C57Bl6 / alb-SREBP-1c	Q9DBK0	ACO12_MOUSE	Q9DBK0	Q9DBK0	-0.611963	0.611963	0.0541615	149	33	-34.5694	0.654306	-1.52834	C57Bl6	alb-SREBP-1c	Acyl-coenzyme A thioesterase 12	Acot12	cytosol	acetyl-CoA hydrolase activity,ATP binding,lipid binding,acyl-CoA hydrolase activity,carboxylic ester hydrolase activity	acetyl-CoA metabolic process,pyruvate metabolic process,fatty acid metabolic process
C57Bl6 / alb-SREBP-1c	P60060	SC61G_MOUSE	P60060	P60060	-0.61125	0.61125	0.444231	3	1	-34.5371	0.654629	-1.52758	C57Bl6	alb-SREBP-1c	Protein transport protein Sec61 subunit gamma	Sec61g	endoplasmic reticulum membrane,membrane,integral component of membrane	molecular_function,P-P-bond-hydrolysis-driven protein transmembrane transporter activity	protein targeting,biological_process,protein transmembrane transport
C57Bl6 / alb-SREBP-1c	Q9JMH6;Q9JMH6-2	TRXR1_MOUSE	Q9JMH6;Q9JMH6-2	Q9JMH6;Q9JMH6-2	-0.611226	0.611226	0.000978676	53	18	-34.536	0.65464	-1.52756	C57Bl6	alb-SREBP-1c	Thioredoxin reductase 1, cytoplasmic;Isoform 2 of Thioredoxin reductase 1, cytoplasmic	Txnrd1	fibrillar center,nucleus,nucleoplasm,cytoplasm,mitochondrion,cytosol;	thioredoxin-disulfide reductase activity,electron carrier activity,flavin adenine dinucleotide binding;	response to oxygen radical,mesoderm formation,gastrulation,cell proliferation,electron transport chain,cell redox homeostasis,cellular oxidant detoxification;
C57Bl6 / alb-SREBP-1c	Q8BHI7	ELOV5_MOUSE	Q8BHI7	Q8BHI7	-0.610888	0.610888	0.184303	3	1	-34.5206	0.654794	-1.5272	C57Bl6	alb-SREBP-1c	Elongation of very long chain fatty acids protein 5	Elovl5	endoplasmic reticulum,integral component of endoplasmic reticulum membrane,dendrite,neuronal cell body,dendritic tree	fatty acid elongase activity,3-oxo-arachidoyl-CoA synthase activity,3-oxo-cerotoyl-CoA synthase activity,3-oxo-lignoceronyl-CoA synthase activity,Requires Ontology	unsaturated fatty acid biosynthetic process,fatty acid elongation, saturated fatty acid,sphingolipid biosynthetic process,fatty acid elongation, monounsaturated fatty acid,fatty acid elongation, polyunsaturated fatty acid,very long-chain fatty acid biosynthetic process,positive regulation of fatty acid biosynthetic process
C57Bl6 / alb-SREBP-1c	Q9CZD5	IF3M_MOUSE	Q9CZD5	Q9CZD5	-0.609755	0.609755	0.469653	2	8	-34.4692	0.655308	-1.526	C57Bl6	alb-SREBP-1c	Translation initiation factor IF-3, mitochondrial	Mtif3	mitochondrion	translation initiation factor activity,translation factor activity, RNA binding,ribosome binding,ribosomal small subunit binding	ribosome disassembly,mitochondrial translational initiation
C57Bl6 / alb-SREBP-1c	Q9CQW1	YKT6_MOUSE	Q9CQW1	Q9CQW1	-0.606982	0.606982	0.240015	4	3	-34.3431	0.656569	-1.52307	C57Bl6	alb-SREBP-1c	Synaptobrevin homolog YKT6	Ykt6	Golgi membrane,cytoplasm,mitochondrion,endosome,endoplasmic reticulum,Golgi apparatus,cytosol,integral component of plasma membrane,cytoplasmic vesicle membrane,SNARE complex,neuronal cell body,apical dendrite,basilar dendrite	SNARE binding,SNAP receptor activity,protein-cysteine S-palmitoyltransferase activity,cadherin binding	exocytosis,ER to Golgi vesicle-mediated transport,vesicle targeting,vesicle docking involved in exocytosis,vesicle fusion,protein transport,retrograde transport, endosome to Golgi
C57Bl6 / alb-SREBP-1c	Q8K182	CO8A_MOUSE	Q8K182	Q8K182	-0.606546	0.606546	0.320812	4	5	-34.3233	0.656767	-1.52261	C57Bl6	alb-SREBP-1c	Complement component C8 alpha chain	C8a	membrane attack complex,extracellular space		complement activation,complement activation, alternative pathway,complement activation, classical pathway,cytolysis
C57Bl6 / alb-SREBP-1c	Q8BWN8	ACOT4_MOUSE	Q8BWN8	Q8BWN8	-0.606252	0.606252	0.164193	104	22	-34.3099	0.656901	-1.5223	C57Bl6	alb-SREBP-1c	Acyl-coenzyme A thioesterase 4	Acot4	peroxisome	succinyl-CoA hydrolase activity,receptor binding,palmitoyl-CoA hydrolase activity,acyl-CoA hydrolase activity,carboxylic ester hydrolase activity,Requires Ontology	very long-chain fatty acid metabolic process,long-chain fatty acid metabolic process,succinyl-CoA metabolic process,acyl-CoA metabolic process,saturated monocarboxylic acid metabolic process,unsaturated monocarboxylic acid metabolic process,dicarboxylic acid metabolic process,dicarboxylic acid catabolic process,short-chain fatty acid metabolic process
C57Bl6 / alb-SREBP-1c	Q9DB29	IAH1_MOUSE	Q9DB29	Q9DB29	-0.605761	0.605761	0.565035	25	11	-34.2875	0.657125	-1.52178	C57Bl6	alb-SREBP-1c	Isoamyl acetate-hydrolyzing esterase 1 homolog	Iah1		molecular_function,hydrolase activity	biological_process,lipid catabolic process
C57Bl6 / alb-SREBP-1c	Q99LB2	DHRS4_MOUSE	Q99LB2	Q99LB2	-0.605393	0.605393	1.2859e-12	179	37	-34.2708	0.657292	-1.52139	C57Bl6	alb-SREBP-1c	Dehydrogenase/reductase SDR family member 4	Dhrs4	nucleus,mitochondrion,peroxisome,peroxisomal membrane	3-keto sterol reductase activity,retinal dehydrogenase activity,carbonyl reductase (NADPH) activity,receptor binding,oxidoreductase activity, acting on NAD(P)H, quinone or similar compound as acceptor,alcohol dehydrogenase [NAD(P)+] activity	alcohol metabolic process,steroid metabolic process,cellular ketone metabolic process,retinal metabolic process,protein tetramerization,oxidation-reduction process
C57Bl6 / alb-SREBP-1c	Q8VC48	PEX12_MOUSE	Q8VC48	Q8VC48	-0.604857	0.604857	2.02997e-07	62	14	-34.2464	0.657536	-1.52083	C57Bl6	alb-SREBP-1c	Peroxisome assembly protein 12	Pex12	peroxisome,integral component of peroxisomal membrane,peroxisomal importomer complex	ubiquitin-protein transferase activity,protein C-terminus binding,zinc ion binding	protein monoubiquitination,peroxisome organization,protein import into peroxisome matrix
C57Bl6 / alb-SREBP-1c	P01864	GCAB_MOUSE	P01864	P01864	-0.603604	0.603604	0.354	6	5	-34.1892	0.658108	-1.51951	C57Bl6	alb-SREBP-1c	Ig gamma-2A chain C region secreted form	NaN	extracellular region	antigen binding,protein binding
C57Bl6 / alb-SREBP-1c	Q3TYS2	CQ062_MOUSE	Q3TYS2	Q3TYS2	-0.599265	0.599265	0.22535	3	1	-33.991	0.66009	-1.51495	C57Bl6	alb-SREBP-1c	Uncharacterized protein C17orf62 homolog	NaN	cellular_component,integral component of membrane	molecular_function	biological_process
C57Bl6 / alb-SREBP-1c	Q9R1P4	PSA1_MOUSE	Q9R1P4	Q9R1P4	-0.599097	0.599097	0.386343	3	1	-33.9833	0.660167	-1.51477	C57Bl6	alb-SREBP-1c	Proteasome subunit alpha type-1	Psma1	proteasome complex,nucleus,nucleoplasm,centrosome,cytosol,proteasome core complex,proteasome core complex, alpha-subunit complex	lipopolysaccharide binding,threonine-type endopeptidase activity,protein binding	immune system process,negative regulation of inflammatory response to antigenic stimulus,ubiquitin-dependent protein catabolic process
C57Bl6 / alb-SREBP-1c	Q61878	PRG2_MOUSE	Q61878	Q61878	-0.598742	0.598742	0.36018	12	3	-33.967	0.66033	-1.5144	C57Bl6	alb-SREBP-1c	Bone marrow proteoglycan	Prg2		carbohydrate binding	defense response to nematode,immune response,negative regulation of interleukin-10 production,positive regulation of interleukin-4 production,regulation of cytokine biosynthetic process,defense response to bacterium
C57Bl6 / alb-SREBP-1c	Q3UV17	K22O_MOUSE	Q3UV17	Q3UV17	-0.598245	0.598245	0.206567	3	2	-33.9443	0.660557	-1.51387	C57Bl6	alb-SREBP-1c	Keratin, type II cytoskeletal 2 oral	Krt76	keratin filament	molecular_function,structural molecule activity	epidermis development,pigmentation,sebaceous gland development
C57Bl6 / alb-SREBP-1c	P55098	PEX2_MOUSE	P55098	P55098	-0.596777	0.596777	0.0518748	29	8	-33.8771	0.661229	-1.51233	C57Bl6	alb-SREBP-1c	Peroxisome biogenesis factor 2	Pex2	integral component of peroxisomal membrane,Cdc73/Paf1 complex	metal ion binding,ubiquitin protein ligase activity	very long-chain fatty acid metabolic process,negative regulation of transcription from RNA polymerase II promoter,neuron migration,fatty acid beta-oxidation,bile acid biosynthetic process,peroxisome organization,nervous system development,protein import into peroxisome matrix,protein ubiquitination,protein destabilization,cholesterol homeostasis,regulation of cholesterol biosynthetic process,nega…
C57Bl6 / alb-SREBP-1c	P53810	PIPNA_MOUSE	P53810	P53810	-0.596751	0.596751	0.424171	4	2	-33.8758	0.661242	-1.51231	C57Bl6	alb-SREBP-1c	Phosphatidylinositol transfer protein alpha isoform	Pitpna	cytosol,integral component of membrane,myelin sheath	phospholipid binding,lipid binding,phosphatidylcholine transporter activity,phosphatidylinositol transporter activity,phosphatidylcholine binding,phosphatidylinositol binding	axonogenesis,phospholipid transport
C57Bl6 / alb-SREBP-1c	P47964	RL36_MOUSE	P47964	P47964	-0.596733	0.596733	0.438585	3	1	-33.8751	0.661249	-1.51229	C57Bl6	alb-SREBP-1c	60S ribosomal protein L36	Rpl36	cytosolic large ribosomal subunit	RNA binding,structural constituent of ribosome	cytoplasmic translation
C57Bl6 / alb-SREBP-1c	Q9QYR9	ACOT2_MOUSE	Q9QYR9	Q9QYR9	-0.596511	0.596511	0.517887	52	20	-33.8649	0.661351	-1.51206	C57Bl6	alb-SREBP-1c	Acyl-coenzyme A thioesterase 2, mitochondrial	Acot2	mitochondrion,mitochondrial matrix	receptor binding,palmitoyl-CoA hydrolase activity,acyl-CoA hydrolase activity,carboxylic ester hydrolase activity,Requires Ontology	very long-chain fatty acid metabolic process,long-chain fatty acid metabolic process,fatty acid metabolic process,acyl-CoA metabolic process
C57Bl6 / alb-SREBP-1c	O70325;O70325-2;O70325-3	GPX4_MOUSE	O70325;O70325-2;O70325-3	O70325;O70325-2;O70325-3	-0.594557	0.594557	0.000101717	28	9	-33.7752	0.662248	-1.51001	C57Bl6	alb-SREBP-1c	Phospholipid hydroperoxide glutathione peroxidase;Isoform Cytoplasmic of Phospholipid hydroperoxide glutathione peroxidase;Isoform Nuclear of Phospholipid hydroperoxide glutathione peroxidase	Gpx4	nucleus,nuclear envelope,nucleoplasm,mitochondrion,mitochondrial inner membrane,cytosol,macromolecular complex;;	glutathione peroxidase activity,identical protein binding,phospholipid-hydroperoxide glutathione peroxidase activity;;	chromatin organization,response to oxidative stress,multicellular organism development,spermatogenesis,protein polymerization,oxidation-reduction process,cellular oxidant detoxification,Requires Ontology;;
C57Bl6 / alb-SREBP-1c	Q80UM7	MOGS_MOUSE	Q80UM7	Q80UM7	-0.593961	0.593961	3.22784e-06	51	20	-33.7478	0.662522	-1.50938	C57Bl6	alb-SREBP-1c	Mannosyl-oligosaccharide glucosidase	Mogs	endoplasmic reticulum,endoplasmic reticulum membrane,integral component of membrane	mannosyl-oligosaccharide glucosidase activity	oligosaccharide metabolic process
C57Bl6 / alb-SREBP-1c	Q9DAT5	MTU1_MOUSE	Q9DAT5	Q9DAT5	-0.593598	0.593598	0.187495	5	5	-33.7312	0.662688	-1.50901	C57Bl6	alb-SREBP-1c	Mitochondrial tRNA-specific 2-thiouridylase 1	Trmu	nucleoplasm,mitochondrion	tRNA binding,ATP binding,sulfurtransferase activity	tRNA wobble position uridine thiolation,mitochondrial tRNA thio-modification
C57Bl6 / alb-SREBP-1c	Q8N7N5	DCAF8_MOUSE	Q8N7N5	Q8N7N5	-0.592406	0.592406	0.000230829	20	9	-33.6764	0.663236	-1.50776	C57Bl6	alb-SREBP-1c	DDB1- and CUL4-associated factor 8	Dcaf8	nucleus,nucleoplasm,cytoplasm,mitochondrion,cytosol,Cul4-RING E3 ubiquitin ligase complex	molecular_function	biological_process,protein ubiquitination
C57Bl6 / alb-SREBP-1c	Q9JHR7	IDE_MOUSE	Q9JHR7	Q9JHR7	-0.58957	0.58957	8.85734e-13	166	44	-33.5459	0.664541	-1.5048	C57Bl6	alb-SREBP-1c	Insulin-degrading enzyme	Ide	extracellular space,cytoplasm,mitochondrion,peroxisome,cytosol,plasma membrane,cell surface	metalloendopeptidase activity,receptor binding,ATP binding,zinc ion binding,peptide binding,identical protein binding,protein homodimerization activity,insulin binding,Requires Ontology	proteolysis,determination of adult lifespan,bradykinin catabolic process,ubiquitin homeostasis,positive regulation of protein oligomerization,beta-amyloid metabolic process,protein homooligomerization,proteolysis involved in cellular protein catabolic process,insulin metabolic process,insulin catabolic process
C57Bl6 / alb-SREBP-1c	P97742	CPT1A_MOUSE	P97742	P97742	-0.587622	0.587622	1.80619e-30	170	38	-33.4561	0.665439	-1.50277	C57Bl6	alb-SREBP-1c	Carnitine O-palmitoyltransferase 1, liver isoform	Cpt1a	mitochondrion,mitochondrial outer membrane,mitochondrial inner membrane,integral component of mitochondrial outer membrane	carnitine O-palmitoyltransferase activity,identical protein binding,palmitoleoyltransferase activity	long-chain fatty acid metabolic process,glucose metabolic process,fatty acid beta-oxidation,triglyceride metabolic process,circadian rhythm,carnitine metabolic process,response to organic cyclic compound,epithelial cell differentiation,positive regulation of fatty acid beta-oxidation,response to drug,eating behavior,regulation of insulin secretion,protein homooligomerization,cellular response to …
C57Bl6 / alb-SREBP-1c	Q78XF5	OSTC_MOUSE	Q78XF5	Q78XF5	-0.587086	0.587086	0.248487	3	1	-33.4314	0.665686	-1.50221	C57Bl6	alb-SREBP-1c	Oligosaccharyltransferase complex subunit OSTC	Ostc	oligosaccharyltransferase complex,integral component of membrane	molecular_function	protein glycosylation,biological_process
C57Bl6 / alb-SREBP-1c	Q8BHH2	RAB9B_MOUSE	Q8BHH2	Q8BHH2	-0.586842	0.586842	0.176434	3	1	-33.4201	0.665799	-1.50196	C57Bl6	alb-SREBP-1c	Ras-related protein Rab-9B	Rab9b	cytosol,plasma membrane,phagocytic vesicle membrane,phagocytic vesicle	GTPase activity,protein binding,GTP binding,GDP binding,identical protein binding	protein transport,retrograde transport, endosome to Golgi
C57Bl6 / alb-SREBP-1c	Q8CHQ9	CMLO2_MOUSE	Q8CHQ9	Q8CHQ9	-0.586371	0.586371	1.67931e-06	30	9	-33.3984	0.666016	-1.50147	C57Bl6	alb-SREBP-1c	Probable N-acetyltransferase CML2	Cml2	endoplasmic reticulum,Golgi apparatus,integral component of membrane,extracellular space	N-acetyltransferase activity	gastrulation with mouth forming second,negative regulation of cell adhesion
C57Bl6 / alb-SREBP-1c	Q9DBS1	TMM43_MOUSE	Q9DBS1	Q9DBS1	-0.582767	0.582767	0.0467904	3	1	-33.2318	0.667682	-1.49772	C57Bl6	alb-SREBP-1c	Transmembrane protein 43	Tmem43	nuclear inner membrane,integral component of nuclear inner membrane,endoplasmic reticulum lumen,Golgi apparatus	protein self-association	nuclear membrane organization
C57Bl6 / alb-SREBP-1c	Q01405	SC23A_MOUSE	Q01405	Q01405	-0.578256	0.578256	0.0166762	30	13	-33.0227	0.669773	-1.49304	C57Bl6	alb-SREBP-1c	Protein transport protein Sec23A	Sec23a	Golgi membrane,endoplasmic reticulum membrane,cytosol,ER to Golgi transport vesicle membrane,extrinsic component of membrane,COPII vesicle coat,ER to Golgi transport vesicle,perinuclear region of cytoplasm,endoplasmic reticulum exit site	protein binding,zinc ion binding	intracellular protein transport,cargo loading into COPII-coated vesicle
C57Bl6 / alb-SREBP-1c	Q9R0A0	PEX14_MOUSE	Q9R0A0	Q9R0A0	-0.578217	0.578217	3.71923e-05	74	20	-33.0209	0.669791	-1.493	C57Bl6	alb-SREBP-1c	Peroxisomal membrane protein PEX14	Pex14	fibrillar center,intracellular,peroxisome,peroxisomal membrane,integral component of membrane,macromolecular complex,peroxisomal importomer complex	transcription corepressor activity,receptor binding,microtubule binding,identical protein binding,protein N-terminus binding,beta-tubulin binding	protein import into peroxisome matrix,protein import into peroxisome matrix, docking,protein import into peroxisome matrix, translocation,negative regulation of protein binding,microtubule anchoring,peroxisome transport along microtubule,negative regulation of sequence-specific DNA binding transcription factor activity,protein import into peroxisome matrix, substrate release,negative regulation o…
C57Bl6 / alb-SREBP-1c	P62342	SELT_MOUSE	P62342	P62342	-0.57767	0.57767	0.208986	4	2	-32.9955	0.670045	-1.49244	C57Bl6	alb-SREBP-1c	Thioredoxin reductase-like selenoprotein T	Selenot	endoplasmic reticulum,endoplasmic reticulum membrane,integral component of membrane	thioredoxin-disulfide reductase activity	positive regulation of cytosolic calcium ion concentration,response to glucose,pancreas development,insulin secretion involved in cellular response to glucose stimulus,glucose homeostasis,cell redox homeostasis,oxidation-reduction process,positive regulation of growth hormone secretion,cellular oxidant detoxification
C57Bl6 / alb-SREBP-1c	Q9DCM2	GSTK1_MOUSE	Q9DCM2	Q9DCM2	-0.575573	0.575573	2.5093e-05	123	21	-32.898	0.67102	-1.49027	C57Bl6	alb-SREBP-1c	Glutathione S-transferase kappa 1	Gstk1	intracellular,mitochondrion,mitochondrial inner membrane,mitochondrial matrix,peroxisome	glutathione transferase activity,glutathione peroxidase activity,receptor binding,protein binding,protein disulfide oxidoreductase activity	glutathione metabolic process,epithelial cell differentiation,oxidation-reduction process,cellular oxidant detoxification
C57Bl6 / alb-SREBP-1c	Q5M8N4;Q5M8N4-2	D39U1_MOUSE	Q5M8N4;Q5M8N4-2	Q5M8N4;Q5M8N4-2	-0.575302	0.575302	0.0805634	7	4	-32.8854	0.671146	-1.48999	C57Bl6	alb-SREBP-1c	Epimerase family protein SDR39U1;Isoform 2 of Epimerase family protein SDR39U1	Sdr39u1	;	molecular_function,oxidoreductase activity,coenzyme binding;	biological_process,oxidation-reduction process;
C57Bl6 / alb-SREBP-1c	P98192	GNPAT_MOUSE	P98192	P98192	-0.574777	0.574777	1.46218e-21	155	43	-32.861	0.67139	-1.48945	C57Bl6	alb-SREBP-1c	Dihydroxyacetone phosphate acyltransferase	Gnpat	mitochondrion,peroxisome,peroxisomal membrane,peroxisomal matrix	catalytic activity,receptor binding,protein binding,glycerone-phosphate O-acyltransferase activity,palmitoyl-CoA hydrolase activity	glycerophospholipid metabolic process,synapse assembly,response to nutrient,ether lipid biosynthetic process,cerebellum morphogenesis,paranodal junction assembly,response to drug,myelination,response to starvation,membrane organization,response to fatty acid
C57Bl6 / alb-SREBP-1c	Q8C7X2;Q8C7X2-2	EMC1_MOUSE	Q8C7X2;Q8C7X2-2	Q8C7X2;Q8C7X2-2	-0.573005	0.573005	3.52989e-05	32	19	-32.7785	0.672215	-1.48762	C57Bl6	alb-SREBP-1c	ER membrane protein complex subunit 1;Isoform 2 of ER membrane protein complex subunit 1	Emc1	endoplasmic reticulum,integral component of membrane,ER membrane protein complex;	molecular_function;	protein folding in endoplasmic reticulum;
C57Bl6 / alb-SREBP-1c	Q6ZWQ7	SPCS3_MOUSE	Q6ZWQ7	Q6ZWQ7	-0.569647	0.569647	0.000808562	14	4	-32.6218	0.673782	-1.48416	C57Bl6	alb-SREBP-1c	Signal peptidase complex subunit 3	Spcs3	endoplasmic reticulum,signal peptidase complex,integral component of membrane,organelle membrane	molecular_function,peptidase activity	signal peptide processing,proteolysis
C57Bl6 / alb-SREBP-1c	Q64505	CP7A1_MOUSE	Q64505	Q64505	-0.569205	0.569205	0.235023	10	6	-32.6012	0.673988	-1.48371	C57Bl6	alb-SREBP-1c	Cholesterol 7-alpha-monooxygenase	Cyp7a1	endoplasmic reticulum membrane,organelle membrane,intracellular membrane-bounded organelle	iron ion binding,cholesterol 7-alpha-monooxygenase activity,heme binding	bile acid biosynthetic process,cholesterol catabolic process,cholesterol homeostasis,oxidation-reduction process,regulation of bile acid biosynthetic process,positive regulation of bile acid biosynthetic process,cellular response to glucose stimulus,cellular response to cholesterol
C57Bl6 / alb-SREBP-1c	P50396	GDIA_MOUSE	P50396	P50396	-0.567339	0.567339	0.293738	2	1	-32.5139	0.674861	-1.48179	C57Bl6	alb-SREBP-1c	Rab GDP dissociation inhibitor alpha	Gdi1	cytoplasm,Golgi apparatus,axon,midbody,macromolecular complex,neuronal cell body,myelin sheath	Rab GDP-dissociation inhibitor activity,GTPase activator activity,Rab GTPase binding	protein transport,Rab protein signal transduction,positive regulation of GTPase activity,positive regulation of axon extension,negative regulation of axonogenesis,response to calcium ion,negative regulation of protein targeting to membrane
C57Bl6 / alb-SREBP-1c	Q8R429	AT2A1_MOUSE	Q8R429	Q8R429	-0.567025	0.567025	0.283789	2	2	-32.4993	0.675007	-1.48147	C57Bl6	alb-SREBP-1c	Sarcoplasmic/endoplasmic reticulum calcium ATPase 1	Atp2a1	mitochondrion,endoplasmic reticulum,endoplasmic reticulum membrane,endoplasmic reticulum-Golgi intermediate compartment,membrane,integral component of membrane,sarcoplasmic reticulum,H zone,I band,sarcoplasmic reticulum membrane,perinuclear region of cytoplasm	calcium-transporting ATPase activity,calcium ion binding,protein binding,ATP binding,ATPase activity,protein homodimerization activity	calcium ion transport,regulation of muscle contraction,regulation of striated muscle contraction,apoptotic mitochondrial changes,positive regulation of fast-twitch skeletal muscle fiber contraction,positive regulation of endoplasmic reticulum calcium ion concentration,negative regulation of endoplasmic reticulum calcium ion concentration,response to endoplasmic reticulum stress,negative regulatio…
C57Bl6 / alb-SREBP-1c	Q6P6J9	TXD15_MOUSE	Q6P6J9	Q6P6J9	-0.563099	0.563099	0.0464743	5	3	-32.3153	0.676847	-1.47744	C57Bl6	alb-SREBP-1c	Thioredoxin domain-containing protein 15	Txndc15	cellular_component,cell,integral component of membrane	molecular_function	biological_process,cell redox homeostasis
C57Bl6 / alb-SREBP-1c	A2AKK5	ACNT1_MOUSE	A2AKK5	A2AKK5	-0.562516	0.562516	3.80983e-07	112	25	-32.288	0.67712	-1.47684	C57Bl6	alb-SREBP-1c	Acyl-coenzyme A amino acid N-acyltransferase 1	Acnat1	peroxisome	N-acyltransferase activity,acyl-CoA hydrolase activity	fatty acid metabolic process,acyl-CoA metabolic process
C57Bl6 / alb-SREBP-1c	Q8CCJ3;Q8CCJ3-1	UFL1_MOUSE	Q8CCJ3;Q8CCJ3-1	Q8CCJ3;Q8CCJ3-1	-0.561486	0.561486	0.0230142	17	8	-32.2396	0.677604	-1.47579	C57Bl6	alb-SREBP-1c	E3 UFM1-protein ligase 1;Isoform 2 of E3 UFM1-protein ligase 1	Ufl1	cytoplasm,endoplasmic reticulum,endoplasmic reticulum membrane,cytosol,macromolecular complex,neuron projection;	protein binding,UFM1 transferase activity;	positive regulation of cell proliferation,regulation of gene expression,negative regulation of protein ubiquitination,negative regulation of NF-kappaB transcription factor activity,positive regulation of protein binding,regulation of proteasomal ubiquitin-dependent protein catabolic process,regulation of protein localization,regulation of intracellular estrogen receptor signaling pathway,response…
C57Bl6 / alb-SREBP-1c	A2AJL3	FGGY_MOUSE	A2AJL3	A2AJL3	-0.560504	0.560504	0.259965	4	3	-32.1935	0.678065	-1.47478	C57Bl6	alb-SREBP-1c	FGGY carbohydrate kinase domain-containing protein	Fggy	cell	D-ribulokinase activity	pentose metabolic process,carbohydrate phosphorylation,neuron cellular homeostasis
C57Bl6 / alb-SREBP-1c	P25688	URIC_MOUSE	P25688	P25688	-0.558289	0.558289	2.7822e-05	306	49	-32.0893	0.679107	-1.47252	C57Bl6	alb-SREBP-1c	Uricase	Uox	mitochondrion,peroxisome	urate oxidase activity	purine nucleobase metabolic process,urate catabolic process,oxidation-reduction process
C57Bl6 / alb-SREBP-1c	P97872	FMO5_MOUSE	P97872	P97872	-0.55776	0.55776	1.49977e-16	123	28	-32.0644	0.679356	-1.47198	C57Bl6	alb-SREBP-1c	Dimethylaniline monooxygenase [N-oxide-forming] 5	Fmo5	endoplasmic reticulum,endoplasmic reticulum membrane,cytosol,integral component of membrane,organelle membrane	N,N-dimethylaniline monooxygenase activity,flavin adenine dinucleotide binding,NADP binding	oxidation-reduction process
C57Bl6 / alb-SREBP-1c	Q9CQY6	UQCC2_MOUSE	Q9CQY6	Q9CQY6	-0.557689	0.557689	0.193339	2	4	-32.061	0.67939	-1.47191	C57Bl6	alb-SREBP-1c	Ubiquinol-cytochrome-c reductase complex assembly factor 2	Uqcc2	mitochondrion,mitochondrial inner membrane,mitochondrial intermembrane space,mitochondrial matrix,nuclear body,mitochondrial nucleoid	molecular_function	regulation of oxidative phosphorylation,mitochondrial respiratory chain complex III assembly,regulation of insulin secretion,positive regulation of mitochondrial translation,positive regulation of cellular protein catabolic process,regulation of skeletal muscle cell differentiation
C57Bl6 / alb-SREBP-1c	P56959	FUS_MOUSE	P56959	P56959	-0.557632	0.557632	0.37264	3	1	-32.0584	0.679416	-1.47185	C57Bl6	alb-SREBP-1c	RNA-binding protein FUS	Fus	nucleus,nucleoplasm,cytoplasm,polysome,perikaryon,dendritic spine head,perinuclear region of cytoplasm	DNA binding,transcription coactivator activity,RNA binding,estrogen receptor binding,identical protein binding,metal ion binding,thyroid hormone receptor binding	regulation of transcription, DNA-templated,cellular response to calcium ion
C57Bl6 / alb-SREBP-1c	P60229	EIF3E_MOUSE	P60229	P60229	-0.55626	0.55626	0.447438	3	2	-31.9937	0.680063	-1.47045	C57Bl6	alb-SREBP-1c	Eukaryotic translation initiation factor 3 subunit E	Eif3e	nucleus,cytoplasm,cytosol,eukaryotic translation initiation factor 3 complex,nuclear body,PML body	cadherin binding,protein N-terminus binding,translation initiation factor activity	nuclear-transcribed mRNA catabolic process, nonsense-mediated decay,translational initiation,positive regulation of translation,positive regulation of mRNA binding
C57Bl6 / alb-SREBP-1c	P50580	PA2G4_MOUSE	P50580	P50580	-0.555839	0.555839	0.00421157	20	12	-31.9739	0.680261	-1.47002	C57Bl6	alb-SREBP-1c	Proliferation-associated protein 2G4	Pa2g4	nucleus,nucleolus,cytoplasm	DNA binding,transcription factor activity, sequence-specific DNA binding,RNA binding,ubiquitin protein ligase binding	transcription, DNA-templated,rRNA processing,regulation of translation,negative regulation of apoptotic process,positive regulation of cell differentiation,negative regulation of transcription, DNA-templated
C57Bl6 / alb-SREBP-1c	Q8VDG7	PAFA2_MOUSE	Q8VDG7	Q8VDG7	-0.552474	0.552474	8.29444e-07	134	29	-31.815	0.68185	-1.4666	C57Bl6	alb-SREBP-1c	Platelet-activating factor acetylhydrolase 2, cytoplasmic	Pafah2	endoplasmic reticulum membrane	1-alkyl-2-acetylglycerophosphocholine esterase activity	lipid catabolic process
C57Bl6 / alb-SREBP-1c	Q791T5;Q791T5-2	MTCH1_MOUSE	Q791T5;Q791T5-2	Q791T5;Q791T5-2	-0.550344	0.550344	2.51769e-06	22	8	-31.7143	0.682857	-1.46444	C57Bl6	alb-SREBP-1c	Mitochondrial carrier homolog 1;Isoform 2 of Mitochondrial carrier homolog 1	Mtch1	mitochondrion,mitochondrial inner membrane,membrane,integral component of membrane;	;	apoptotic process,activation of cysteine-type endopeptidase activity involved in apoptotic process,positive regulation of apoptotic process;
C57Bl6 / alb-SREBP-1c	P15105	GLNA_MOUSE	P15105	P15105	-0.549187	0.549187	5.40185e-08	49	18	-31.6595	0.683405	-1.46326	C57Bl6	alb-SREBP-1c	Glutamine synthetase	Glul	cytoplasm,mitochondrion,rough endoplasmic reticulum,cytosol,macromolecular complex,perikaryon,myelin sheath,axon terminus,cell body,glial cell projection	magnesium ion binding,glutamate decarboxylase activity,glutamate-ammonia ligase activity,protein binding,ATP binding,glutamate binding,manganese ion binding,identical protein binding	glutamine biosynthetic process,cell proliferation,cellular response to starvation,response to glucose,ammonia assimilation cycle,positive regulation of insulin secretion,positive regulation of epithelial cell proliferation,protein homooligomerization,positive regulation of synaptic transmission, glutamatergic
C57Bl6 / alb-SREBP-1c	P46978	STT3A_MOUSE	P46978	P46978	-0.547984	0.547984	0.0151065	46	19	-31.6025	0.683975	-1.46204	C57Bl6	alb-SREBP-1c	Dolichyl-diphosphooligosaccharide--protein glycosyltransferase subunit STT3A	Stt3a	oligosaccharyltransferase complex,membrane,integral component of membrane	dolichyl-diphosphooligosaccharide-protein glycotransferase activity,metal ion binding	protein N-linked glycosylation via asparagine,co-translational protein modification,post-translational protein modification
C57Bl6 / alb-SREBP-1c	Q8K3K7	PLCB_MOUSE	Q8K3K7	Q8K3K7	-0.547805	0.547805	0.000529192	22	8	-31.594	0.68406	-1.46186	C57Bl6	alb-SREBP-1c	1-acyl-sn-glycerol-3-phosphate acyltransferase beta	Agpat2	endoplasmic reticulum,endoplasmic reticulum membrane,integral component of membrane	1-acylglycerol-3-phosphate O-acyltransferase activity	positive regulation of cytokine production,phosphatidic acid biosynthetic process,epidermis development,phospholipid biosynthetic process,CDP-diacylglycerol biosynthetic process,response to drug,glycerophospholipid biosynthetic process
C57Bl6 / alb-SREBP-1c	P61620	S61A1_MOUSE	P61620	P61620	-0.547075	0.547075	0.000101717	48	12	-31.5594	0.684406	-1.46112	C57Bl6	alb-SREBP-1c	Protein transport protein Sec61 subunit alpha isoform 1	Sec61a1	endoplasmic reticulum membrane,rough endoplasmic reticulum,membrane,integral component of membrane,phagocytic vesicle membrane	transmembrane transporter activity,ribosome binding	cotranslational protein targeting to membrane,SRP-dependent cotranslational protein targeting to membrane,posttranslational protein targeting to membrane,endoplasmic reticulum organization,response to interferon-gamma,pronephric nephron development,transmembrane transport
C57Bl6 / alb-SREBP-1c	O08914	FAAH1_MOUSE	O08914	O08914	-0.546399	0.546399	1.10867e-10	81	23	-31.5273	0.684727	-1.46044	C57Bl6	alb-SREBP-1c	Fatty-acid amide hydrolase 1	Faah	Golgi membrane,endoplasmic reticulum membrane,integral component of membrane,organelle membrane	amidase activity,fatty acid amide hydrolase activity,acylglycerol lipase activity,Requires Ontology,anandamide amidohydrolase activity	fatty acid catabolic process
C57Bl6 / alb-SREBP-1c	P63037	DNJA1_MOUSE	P63037	P63037	-0.545972	0.545972	2.93955e-05	34	11	-31.507	0.68493	-1.46	C57Bl6	alb-SREBP-1c	DnaJ homolog subfamily A member 1	Dnaja1	nucleus,mitochondrion,endoplasmic reticulum,cytosol,microtubule cytoskeleton,membrane,perinuclear region of cytoplasm,ubiquitin ligase complex	G-protein coupled receptor binding,ATPase activator activity,protein binding,ATP binding,Hsp70 protein binding,Tat protein binding,ubiquitin protein ligase binding,metal ion binding,low-density lipoprotein particle receptor binding,unfolded protein binding,chaperone binding,C3HC4-type RING finger domain binding	protein folding,spermatogenesis,response to heat,flagellated sperm motility,androgen receptor signaling pathway,negative regulation of protein ubiquitination,positive regulation of ATPase activity,DNA damage response, detection of DNA damage,positive regulation of apoptotic process,negative regulation of apoptotic process,negative regulation of JUN kinase activity,regulation of protein transport,…
C57Bl6 / alb-SREBP-1c	Q61171	PRDX2_MOUSE	Q61171	Q61171	-0.544451	0.544451	0.106491	10	5	-31.4348	0.685652	-1.45847	C57Bl6	alb-SREBP-1c	Peroxiredoxin-2	Prdx2	mitochondrion,cytosol,myelin sheath	peroxidase activity,protein binding,thioredoxin peroxidase activity,selenium binding,antioxidant activity	activation of MAPK activity,respiratory burst involved in inflammatory response,response to oxidative stress,regulation of hydrogen peroxide metabolic process,removal of superoxide radicals,positive regulation of blood coagulation,negative regulation of lipopolysaccharide-mediated signaling pathway,negative regulation of NF-kappaB transcription factor activity,response to lipopolysaccharide,cellu…
C57Bl6 / alb-SREBP-1c	Q05915	GCH1_MOUSE	Q05915	Q05915	-0.542204	0.542204	0.44285	3	1	-31.3279	0.686721	-1.4562	C57Bl6	alb-SREBP-1c	GTP cyclohydrolase 1	Gch1	nucleus,nucleoplasm,cytoplasm,cytosol,cytoplasmic vesicle,nuclear membrane,macromolecular complex	GTPase activity,GTP cyclohydrolase I activity,calcium ion binding,GTP binding,zinc ion binding,protein homodimerization activity,coenzyme binding,mitogen-activated protein kinase binding	tetrahydrobiopterin biosynthetic process,regulation of blood pressure,positive regulation of heart rate,regulation of lung blood pressure,response to interferon-gamma,response to tumor necrosis factor,7,8-dihydroneopterin 3'-triphosphate biosynthetic process,vasodilation,dopamine biosynthetic process,pteridine-containing compound biosynthetic process,negative regulation of blood pressure,tetrahyd…
C57Bl6 / alb-SREBP-1c	O88623;O88623-2;O88623-3;O88623-4	UBP2_MOUSE	O88623;O88623-2;O88623-3;O88623-4	O88623;O88623-2;O88623-3;O88623-4	-0.541307	0.541307	0.0777198	18	6	-31.2852	0.687148	-1.45529	C57Bl6	alb-SREBP-1c	Ubiquitin carboxyl-terminal hydrolase 2;Isoform 2 of Ubiquitin carboxyl-terminal hydrolase 2;Isoform 3 of Ubiquitin carboxyl-terminal hydrolase 2;Isoform 4 of Ubiquitin carboxyl-terminal hydrolase 2	Usp2	nucleus,cytoplasm,centrosome,cell cortex,membrane,perinuclear region of cytoplasm;;;	thiol-dependent ubiquitin-specific protease activity,cyclin binding,ubiquitin protein ligase binding,identical protein binding,metal ion binding;;;	negative regulation of transcription from RNA polymerase II promoter,ubiquitin-dependent protein catabolic process,cell cycle,muscle organ development,protein deubiquitination,circadian regulation of gene expression,entrainment of circadian clock by photoperiod,locomotor rhythm,positive regulation of mitotic cell cycle,circadian behavior,protein stabilization;;;
C57Bl6 / alb-SREBP-1c	P70245	EBP_MOUSE	P70245	P70245	-0.540424	0.540424	0.0497074	9	2	-31.2431	0.687569	-1.4544	C57Bl6	alb-SREBP-1c	3-beta-hydroxysteroid-Delta(8),Delta(7)-isomerase	Ebp	nuclear envelope,endoplasmic reticulum,endoplasmic reticulum membrane,integral component of membrane,cytoplasmic vesicle	C-8 sterol isomerase activity,steroid delta-isomerase activity,cholestenol delta-isomerase activity	cholesterol biosynthetic process,sterol biosynthetic process,hemopoiesis
C57Bl6 / alb-SREBP-1c	P83882	RL36A_MOUSE	P83882	P83882	-0.539864	0.539864	0.317255	2	2	-31.2164	0.687836	-1.45384	C57Bl6	alb-SREBP-1c	60S ribosomal protein L36a	Rpl36a	cytosolic large ribosomal subunit	molecular_function,structural constituent of ribosome	translation,biological_process
C57Bl6 / alb-SREBP-1c	Q4PJX1;Q4PJX1-2;Q4PJX1-3	ODR4_MOUSE	Q4PJX1;Q4PJX1-2;Q4PJX1-3	Q4PJX1;Q4PJX1-2;Q4PJX1-3	-0.539124	0.539124	0.0152806	11	4	-31.1811	0.688189	-1.45309	C57Bl6	alb-SREBP-1c	Protein odr-4 homolog;Isoform 2 of Protein odr-4 homolog;Isoform 3 of Protein odr-4 homolog	Odr4	cellular_component,integral component of membrane;;	molecular_function;;	biological_process;;
C57Bl6 / alb-SREBP-1c	P29341	PABP1_MOUSE	P29341	P29341	-0.538854	0.538854	0.577147	6	3	-31.1683	0.688317	-1.45282	C57Bl6	alb-SREBP-1c	Polyadenylate-binding protein 1	Pabpc1	nucleus,cytoplasm,cytosol,cytoplasmic stress granule,dendrite,cytoplasmic ribonucleoprotein granule,catalytic step 2 spliceosome,messenger ribonucleoprotein complex,ribonucleoprotein complex	RNA binding,mRNA 3'-UTR binding,protein binding,protein C-terminus binding,poly(A) binding,poly(U) RNA binding	nuclear-transcribed mRNA catabolic process, nonsense-mediated decay,mRNA processing,RNA splicing,gene silencing by RNA,positive regulation of viral genome replication,positive regulation of nuclear-transcribed mRNA poly(A) tail shortening,positive regulation of nuclear-transcribed mRNA catabolic process, deadenylation-dependent decay,negative regulation of nuclear-transcribed mRNA catabolic proce…
C57Bl6 / alb-SREBP-1c	O35465;O35465-2	FKBP8_MOUSE	O35465;O35465-2	O35465;O35465-2	-0.537347	0.537347	0.00265881	28	9	-31.0963	0.689037	-1.4513	C57Bl6	alb-SREBP-1c	Peptidyl-prolyl cis-trans isomerase FKBP8;Isoform 2 of Peptidyl-prolyl cis-trans isomerase FKBP8	Fkbp8	mitochondrion,mitochondrial envelope,endoplasmic reticulum,cytosol,integral component of endoplasmic reticulum membrane,mitochondrial membrane,macromolecular complex;	peptidyl-prolyl cis-trans isomerase activity,FK506 binding,identical protein binding,disordered domain specific binding;	protein peptidyl-prolyl isomerization,cell fate specification,negative regulation of protein phosphorylation,apoptotic process,smoothened signaling pathway,dorsal/ventral pattern formation,regulation of gene expression,dorsal/ventral neural tube patterning,neural tube development,regulation of BMP signaling pathway,positive regulation of BMP signaling pathway,multicellular organism growth,camera-…
C57Bl6 / alb-SREBP-1c	Q6PIE5	AT1A2_MOUSE	Q6PIE5	Q6PIE5	-0.534603	0.534603	0.532464	3	1	-30.9651	0.690349	-1.44854	C57Bl6	alb-SREBP-1c	Sodium/potassium-transporting ATPase subunit alpha-2	Atp1a2	cytoplasm,endosome,plasma membrane,sodium:potassium-exchanging ATPase complex,caveola,intercalated disc,membrane,T-tubule,sarcolemma,dendritic spine,myelin sheath	sodium:potassium-exchanging ATPase activity,protein binding,chaperone binding,steroid hormone binding,ATP binding,drug binding,ATPase activity,potassium ion binding,sodium ion binding	neurotransmitter uptake,regulation of the force of heart contraction,regulation of respiratory gaseous exchange by neurological system process,cellular sodium ion homeostasis,regulation of muscle contraction,regulation of smooth muscle contraction,regulation of striated muscle contraction,regulation of blood pressure,adult locomotory behavior,visual learning,potassium ion import,establishment or …
C57Bl6 / alb-SREBP-1c	Q6GQT9	NOMO1_MOUSE	Q6GQT9	Q6GQT9	-0.533734	0.533734	2.11303e-09	53	29	-30.9236	0.690764	-1.44767	C57Bl6	alb-SREBP-1c	Nodal modulator 1	Nomo1	endoplasmic reticulum membrane,integral component of membrane	molecular_function,carbohydrate binding	biological_process
C57Bl6 / alb-SREBP-1c	Q811I0	ATPF1_MOUSE	Q811I0	Q811I0	-0.533719	0.533719	0.444329	5	6	-30.9228	0.690772	-1.44766	C57Bl6	alb-SREBP-1c	ATP synthase mitochondrial F1 complex assembly factor 1	Atpaf1	mitochondrion	molecular_function	mitochondrial proton-transporting ATP synthase complex assembly
C57Bl6 / alb-SREBP-1c	Q924Z4	CERS2_MOUSE	Q924Z4	Q924Z4	-0.533626	0.533626	2.55961e-05	25	6	-30.9184	0.690816	-1.44756	C57Bl6	alb-SREBP-1c	Ceramide synthase 2	Cers2	endoplasmic reticulum,endoplasmic reticulum membrane,integral component of membrane,nuclear membrane	DNA binding,sphingosine N-acyltransferase activity	sphingolipid biosynthetic process,ceramide biosynthetic process,negative regulation of Schwann cell migration,negative regulation of Schwann cell proliferation involved in axon regeneration
C57Bl6 / alb-SREBP-1c	Q9CYV5	TM135_MOUSE	Q9CYV5	Q9CYV5	-0.532317	0.532317	3.92396e-19	122	27	-30.8557	0.691443	-1.44625	C57Bl6	alb-SREBP-1c	Transmembrane protein 135	Tmem135	cytoplasm,mitochondrion,peroxisome,peroxisomal membrane,lipid particle,integral component of membrane,mitochondrial membrane	molecular_function	peroxisome organization,determination of adult lifespan,response to cold,positive regulation of gene expression,positive regulation of lipid storage,positive regulation of mitochondrial membrane potential,response to food,regulation of mitochondrial fission
C57Bl6 / alb-SREBP-1c	O88962	CP8B1_MOUSE	O88962	O88962	-0.531788	0.531788	8.89226e-05	51	19	-30.8303	0.691697	-1.44572	C57Bl6	alb-SREBP-1c	7-alpha-hydroxycholest-4-en-3-one 12-alpha-hydroxylase	Cyp8b1	endoplasmic reticulum membrane,integral component of membrane,organelle membrane	iron ion binding,sterol 12-alpha-hydroxylase activity,heme binding	oxidation-reduction process
C57Bl6 / alb-SREBP-1c	P58137	ACOT8_MOUSE	P58137	P58137	-0.531778	0.531778	3.1459e-10	100	19	-30.8298	0.691702	-1.44571	C57Bl6	alb-SREBP-1c	Acyl-coenzyme A thioesterase 8	Acot8	mitochondrion,peroxisome,peroxisomal matrix	receptor binding,palmitoyl-CoA hydrolase activity,choloyl-CoA hydrolase activity,acyl-CoA hydrolase activity,carboxylic ester hydrolase activity,medium-chain acyl-CoA hydrolase activity	acyl-CoA metabolic process,fatty acid catabolic process,peroxisome fission,dicarboxylic acid catabolic process,negative regulation of CD4 biosynthetic process
C57Bl6 / alb-SREBP-1c	Q91VC9	GHITM_MOUSE	Q91VC9	Q91VC9	-0.529959	0.529959	0.129532	10	5	-30.7425	0.692575	-1.44389	C57Bl6	alb-SREBP-1c	Growth hormone-inducible transmembrane protein	Ghitm	mitochondrion,mitochondrial inner membrane,integral component of membrane		apoptotic process
C57Bl6 / alb-SREBP-1c	Q8BWQ1	UD2A3_MOUSE	Q8BWQ1	Q8BWQ1	-0.528739	0.528739	4.62502e-12	91	20	-30.684	0.69316	-1.44267	C57Bl6	alb-SREBP-1c	UDP-glucuronosyltransferase 2A3	Ugt2a3	integral component of membrane,intracellular membrane-bounded organelle	glucuronosyltransferase activity	cellular glucuronidation
C57Bl6 / alb-SREBP-1c	Q91VS7	MGST1_MOUSE	Q91VS7	Q91VS7	-0.528552	0.528552	3.42403e-07	67	8	-30.675	0.69325	-1.44248	C57Bl6	alb-SREBP-1c	Microsomal glutathione S-transferase 1	Mgst1	mitochondrion,mitochondrial outer membrane,mitochondrial inner membrane,endoplasmic reticulum,endoplasmic reticulum membrane,integral component of membrane	glutathione transferase activity,glutathione peroxidase activity	glutathione metabolic process,oxidation-reduction process,protein homotrimerization,cellular response to lipid hydroperoxide,cellular oxidant detoxification
C57Bl6 / alb-SREBP-1c	P46638	RB11B_MOUSE	P46638	P46638	-0.528229	0.528229	0.0174086	15	7	-30.6594	0.693406	-1.44216	C57Bl6	alb-SREBP-1c	Ras-related protein Rab-11B	Rab11b	cytoplasm,mitochondrion,synaptic vesicle,cell junction,phagocytic vesicle membrane,cytoplasmic vesicle,phagocytic vesicle,recycling endosome,recycling endosome membrane,anchored component of synaptic vesicle membrane	GTPase activity,protein binding,GTP binding,GDP binding,myosin V binding,cadherin binding	receptor recycling,melanosome transport,transferrin transport,insulin secretion involved in cellular response to glucose stimulus,regulation of anion transport,constitutive secretory pathway,regulated exocytosis,transcytosis,cellular response to acidic pH,establishment of protein localization to membrane,retrograde transport, endosome to plasma membrane,regulation of protein localization to cell …
C57Bl6 / alb-SREBP-1c	P97822;P97822-2	AN32E_MOUSE	P97822;P97822-2	P97822;P97822-2	-0.527063	0.527063	0.176738	9	3	-30.6034	0.693966	-1.44099	C57Bl6	alb-SREBP-1c	Acidic leucine-rich nuclear phosphoprotein 32 family member E;Isoform 2 of Acidic leucine-rich nuclear phosphoprotein 32 family member E	Anp32e	Swr1 complex,nucleus,cytoplasm,cytoplasmic vesicle;	phosphatase inhibitor activity,histone binding;	nucleosome assembly,nucleocytoplasmic transport,regulation of apoptotic process,negative regulation of catalytic activity,histone exchange;
C57Bl6 / alb-SREBP-1c	Q8BGC4	PTGR3_MOUSE	Q8BGC4	Q8BGC4	-0.526583	0.526583	0.167963	111	23	-30.5803	0.694197	-1.44051	C57Bl6	alb-SREBP-1c	Prostaglandin reductase-3	Zadh2	mitochondrion,peroxisome	zinc ion binding,13-prostaglandin reductase activity,15-oxoprostaglandin 13-oxidase activity	prostaglandin metabolic process,negative regulation of fat cell differentiation,oxidation-reduction process
C57Bl6 / alb-SREBP-1c	P19221	THRB_MOUSE	P19221	P19221	-0.526273	0.526273	0.0780993	15	7	-30.5654	0.694346	-1.4402	C57Bl6	alb-SREBP-1c	Prothrombin	F2	extracellular space,external side of plasma membrane	lipopolysaccharide binding,serine-type endopeptidase activity,receptor binding,calcium ion binding,protein binding,heparin binding,peptidase activity,thrombospondin receptor activity	positive regulation of protein phosphorylation,proteolysis,acute-phase response,cell surface receptor signaling pathway,positive regulation of cell proliferation,regulation of cell shape,response to wounding,regulation of gene expression,positive regulation of phosphatidylinositol 3-kinase signaling,platelet activation,positive regulation of blood coagulation,positive regulation of cell growth,po…
C57Bl6 / alb-SREBP-1c	P70168	IMB1_MOUSE	P70168	P70168	-0.525502	0.525502	0.228471	9	4	-30.5283	0.694717	-1.43943	C57Bl6	alb-SREBP-1c	Importin subunit beta-1	Kpnb1	nuclear envelope,nucleoplasm,cytoplasm,cytosol,nuclear membrane,macromolecular complex,nuclear periphery,endoplasmic reticulum tubular network,cytoplasmic stress granule	protein binding,nuclear localization sequence binding,Ran GTPase binding,protein transporter activity,enzyme binding,protein domain specific binding,Hsp90 protein binding	protein import into nucleus, translocation,protein import into nucleus,NLS-bearing protein import into nucleus,ribosomal protein import into nucleus,mitotic chromosome movement towards spindle pole,mitotic metaphase plate congression,astral microtubule organization,Ran protein signal transduction,establishment of mitotic spindle localization,establishment of protein localization,mitotic spindle a…
C57Bl6 / alb-SREBP-1c	Q62095	DDX3Y_MOUSE	Q62095	Q62095	-0.524205	0.524205	0.380327	3	1	-30.4658	0.695342	-1.43814	C57Bl6	alb-SREBP-1c	ATP-dependent RNA helicase DDX3Y	Ddx3y	nucleus,nucleolus,cytosol,cytoplasmic ribonucleoprotein granule	RNA binding,ATP-dependent RNA helicase activity,ATP binding	translational initiation,chromosome segregation,regulation of gene expression,RNA secondary structure unwinding
C57Bl6 / alb-SREBP-1c	Q9EPL9	ACOX3_MOUSE	Q9EPL9	Q9EPL9	-0.522942	0.522942	4.58392e-17	182	39	-30.4049	0.695951	-1.43688	C57Bl6	alb-SREBP-1c	Peroxisomal acyl-coenzyme A oxidase 3	Acox3	mitochondrion,peroxisome,peroxisomal matrix	acyl-CoA dehydrogenase activity,receptor binding,pristanoyl-CoA oxidase activity,flavin adenine dinucleotide binding,FAD binding	fatty acid beta-oxidation,fatty acid beta-oxidation using acyl-CoA dehydrogenase,fatty acid beta-oxidation using acyl-CoA oxidase
C57Bl6 / alb-SREBP-1c	Q99J47;Q99J47-2	DRS7B_MOUSE	Q99J47;Q99J47-2	Q99J47;Q99J47-2	-0.522288	0.522288	7.91696e-20	76	17	-30.3733	0.696267	-1.43623	C57Bl6	alb-SREBP-1c	Dehydrogenase/reductase SDR family member 7B;Isoform 2 of Dehydrogenase/reductase SDR family member 7B	Dhrs7b	endoplasmic reticulum membrane,integral component of membrane;	oxidoreductase activity;	oxidation-reduction process;
C57Bl6 / alb-SREBP-1c	Q80UU9	PGRC2_MOUSE	Q80UU9	Q80UU9	-0.519428	0.519428	0.479305	23	7	-30.2351	0.697649	-1.43339	C57Bl6	alb-SREBP-1c	Membrane-associated progesterone receptor component 2	Pgrmc2	nuclear envelope,endomembrane system,membrane,integral component of membrane	steroid binding,protein binding,heme binding	biological_process
C57Bl6 / alb-SREBP-1c	Q8BG51-2;Q8BG51-4	MIRO1_MOUSE	Q8BG51-2;Q8BG51-4	Q8BG51-2;Q8BG51-4	-0.51468	0.51468	4.06683e-10	61	19	-30.0052	0.699948	-1.42868	C57Bl6	alb-SREBP-1c	Isoform 2 of Mitochondrial Rho GTPase 1;Isoform 4 of Mitochondrial Rho GTPase 1	Rhot1	;	;	;
C57Bl6 / alb-SREBP-1c	O70152	DPM1_MOUSE	O70152	O70152	-0.514313	0.514313	2.21243e-05	18	6	-29.9874	0.700126	-1.42831	C57Bl6	alb-SREBP-1c	Dolichol-phosphate mannosyltransferase subunit 1	Dpm1	endoplasmic reticulum,endoplasmic reticulum membrane,membrane,dolichol-phosphate-mannose synthase complex	dolichyl-phosphate-mannose-protein mannosyltransferase activity,dolichyl-phosphate beta-D-mannosyltransferase activity	GPI anchor biosynthetic process,dolichol metabolic process,protein mannosylation,protein O-linked mannosylation
C57Bl6 / alb-SREBP-1c	Q8BGF6	ELMD2_MOUSE	Q8BGF6	Q8BGF6	-0.514152	0.514152	0.466202	5	3	-29.9796	0.700204	-1.42815	C57Bl6	alb-SREBP-1c	ELMO domain-containing protein 2	Elmod2		GTPase activator activity	positive regulation of GTPase activity,regulation of defense response to virus
C57Bl6 / alb-SREBP-1c	P35282	RAB21_MOUSE	P35282	P35282	-0.513738	0.513738	0.534423	16	6	-29.9595	0.700405	-1.42774	C57Bl6	alb-SREBP-1c	Ras-related protein Rab-21	Rab21	endosome,early endosome,endoplasmic reticulum membrane,trans-Golgi network,cytoplasmic side of plasma membrane,vesicle membrane,cytoplasmic vesicle membrane,cleavage furrow,Golgi cisterna membrane,neuron projection,cytoplasmic side of early endosome membrane,axon cytoplasm	GTPase activity,protein binding,GTP binding,GDP binding	anterograde axonal transport,protein transport,regulation of exocytosis,regulation of endocytosis,regulation of axon extension,positive regulation of receptor-mediated endocytosis,positive regulation of dendrite morphogenesis,positive regulation of early endosome to late endosome transport
C57Bl6 / alb-SREBP-1c	Q8VCN5	CGL_MOUSE	Q8VCN5	Q8VCN5	-0.513145	0.513145	0.0179642	31	11	-29.9307	0.700693	-1.42716	C57Bl6	alb-SREBP-1c	Cystathionine gamma-lyase	Cth	cytoplasm,cytosol	cystathionine gamma-synthase activity,cystathionine gamma-lyase activity,protein binding,calmodulin binding,pyridoxal phosphate binding,identical protein binding,L-cystine L-cysteine-lyase (deaminating),L-cysteine desulfhydrase activity,selenomethionine gamma-lyase activity	protein-pyridoxal-5-phosphate linkage via peptidyl-N6-pyridoxal phosphate-L-lysine,cysteine biosynthetic process via cystathionine,cysteine biosynthetic process,transsulfuration,negative regulation of apoptotic process,positive regulation of I-kappaB kinase/NF-kappaB signaling,protein sulfhydration,positive regulation of NF-kappaB transcription factor activity,protein homotetramerization,hydrogen…
C57Bl6 / alb-SREBP-1c	Q9R0P6	SC11A_MOUSE	Q9R0P6	Q9R0P6	-0.510547	0.510547	0.00458452	24	6	-29.8044	0.701956	-1.42459	C57Bl6	alb-SREBP-1c	Signal peptidase complex catalytic subunit SEC11A	Sec11a	signal peptidase complex,integral component of membrane,organelle membrane	peptidase activity,serine-type peptidase activity	signal peptide processing
C57Bl6 / alb-SREBP-1c	Q8CCM6-2	TIM21_MOUSE	Q8CCM6-2	Q8CCM6-2	-0.509181	0.509181	0.448085	9	6	-29.7379	0.702621	-1.42324	C57Bl6	alb-SREBP-1c	Isoform 2 of Mitochondrial import inner membrane translocase subunit Tim21	Timm21
C57Bl6 / alb-SREBP-1c	Q9CQN6	TM14C_MOUSE	Q9CQN6	Q9CQN6	-0.508032	0.508032	0.0151417	27	5	-29.6819	0.703181	-1.42211	C57Bl6	alb-SREBP-1c	Transmembrane protein 14C	Tmem14c	mitochondrion,mitochondrial inner membrane,integral component of membrane	molecular_function	heme biosynthetic process,mitochondrial transport,erythrocyte differentiation,regulation of heme biosynthetic process
C57Bl6 / alb-SREBP-1c	Q9CU62	SMC1A_MOUSE	Q9CU62	Q9CU62	-0.508012	0.508012	0.434537	3	1	-29.6809	0.703191	-1.42209	C57Bl6	alb-SREBP-1c	Structural maintenance of chromosomes protein 1A	Smc1a	kinetochore,nucleus,nucleoplasm,cytosol,cohesin complex,nuclear matrix,meiotic cohesin complex,mitotic spindle pole	chromatin binding,protein binding,ATP binding,mediator complex binding,macromolecular complex binding,protein heterodimerization activity	DNA repair,sister chromatid cohesion,mitotic sister chromatid cohesion,response to radiation,stem cell population maintenance,negative regulation of DNA endoreduplication,cell division,meiotic cell cycle,response to DNA damage checkpoint signaling,regulation of mitotic spindle assembly
C57Bl6 / alb-SREBP-1c	Q8BKZ9	ODPX_MOUSE	Q8BKZ9	Q8BKZ9	-0.507421	0.507421	0.0877031	34	16	-29.6521	0.703479	-1.42151	C57Bl6	alb-SREBP-1c	Pyruvate dehydrogenase protein X component, mitochondrial	Pdhx	mitochondrion,mitochondrial matrix,pyruvate dehydrogenase complex	transferase activity, transferring acyl groups,pyruvate dehydrogenase (NAD+) activity	mitochondrial acetyl-CoA biosynthetic process from pyruvate
C57Bl6 / alb-SREBP-1c	Q80XL6	ACD11_MOUSE	Q80XL6	Q80XL6	-0.506687	0.506687	0.0019319	332	65	-29.6163	0.703837	-1.42078	C57Bl6	alb-SREBP-1c	Acyl-CoA dehydrogenase family member 11	Acad11	nucleus,mitochondrion,peroxisome,mitochondrial membrane	acyl-CoA dehydrogenase activity,long-chain-acyl-CoA dehydrogenase activity,very-long-chain-acyl-CoA dehydrogenase activity,flavin adenine dinucleotide binding,medium-chain-acyl-CoA dehydrogenase activity	fatty acid beta-oxidation using acyl-CoA dehydrogenase
C57Bl6 / alb-SREBP-1c	O70503	DHB12_MOUSE	O70503	O70503	-0.505783	0.505783	1.38651e-09	71	16	-29.5722	0.704278	-1.41989	C57Bl6	alb-SREBP-1c	Very-long-chain 3-oxoacyl-CoA reductase	Hsd17b12	proteinaceous extracellular matrix,endoplasmic reticulum membrane,integral component of membrane	fibronectin binding,estradiol 17-beta-dehydrogenase activity,collagen binding,heparin binding,long-chain-3-hydroxyacyl-CoA dehydrogenase activity,3-oxo-arachidoyl-CoA reductase activity,3-oxo-behenoyl-CoA reductase activity,3-oxo-lignoceroyl-CoA reductase activity,Requires Ontology	fatty acid biosynthetic process,estrogen biosynthetic process,positive regulation of cell-substrate adhesion,extracellular matrix organization,oxidation-reduction process
C57Bl6 / alb-SREBP-1c	Q8BU14	SEC62_MOUSE	Q8BU14	Q8BU14	-0.505723	0.505723	0.0888223	13	6	-29.5693	0.704307	-1.41983	C57Bl6	alb-SREBP-1c	Translocation protein SEC62	Sec62	membrane,integral component of endoplasmic reticulum membrane	molecular_function	posttranslational protein targeting to membrane
C57Bl6 / alb-SREBP-1c	O88844	IDHC_MOUSE	O88844	O88844	-0.504797	0.504797	0.000531576	191	32	-29.5241	0.704759	-1.41892	C57Bl6	alb-SREBP-1c	Isocitrate dehydrogenase [NADP] cytoplasmic	Idh1	cytoplasm,mitochondrion,peroxisome,cytosol	magnesium ion binding,isocitrate dehydrogenase activity,isocitrate dehydrogenase (NADP+) activity,receptor binding,identical protein binding,protein homodimerization activity,cadherin binding,NADP binding,NAD binding,(R)-2-hydroxyglutarate dehydrogenase activity	glyoxylate cycle,tricarboxylic acid cycle,isocitrate metabolic process,2-oxoglutarate metabolic process,glutathione metabolic process,response to oxidative stress,female gonad development,response to steroid hormone,regulation of phospholipid catabolic process,regulation of phospholipid biosynthetic process
C57Bl6 / alb-SREBP-1c	Q9WV68	DECR2_MOUSE	Q9WV68	Q9WV68	-0.504007	0.504007	0.000525411	106	20	-29.4854	0.705146	-1.41815	C57Bl6	alb-SREBP-1c	Peroxisomal 2,4-dienoyl-CoA reductase	Decr2	peroxisome	receptor binding,2,4-dienoyl-CoA reductase (NADPH) activity,trans-2-enoyl-CoA reductase (NADPH) activity	unsaturated fatty acid biosynthetic process,oxidation-reduction process
C57Bl6 / alb-SREBP-1c	P99025	GFRP_MOUSE	P99025	P99025	-0.503764	0.503764	0.198401	2	1	-29.4735	0.705265	-1.41791	C57Bl6	alb-SREBP-1c	GTP cyclohydrolase 1 feedback regulatory protein	Gchfr	nucleus,nucleoplasm,cytoplasm,cytosol,dendrite,nuclear membrane,macromolecular complex,melanosome	enzyme inhibitor activity,amino acid binding,GTP cyclohydrolase binding	negative regulation of biosynthetic process,negative regulation of GTP cyclohydrolase I activity,protein heterooligomerization
C57Bl6 / alb-SREBP-1c	Q04857	CO6A1_MOUSE	Q04857	Q04857	-0.501402	0.501402	0.430845	8	3	-29.358	0.70642	-1.41559	C57Bl6	alb-SREBP-1c	Collagen alpha-1(VI) chain	Col6a1	extracellular region,proteinaceous extracellular matrix,collagen trimer,extracellular space,extracellular matrix,macromolecular complex,sarcolemma	platelet-derived growth factor binding	cell adhesion,endodermal cell differentiation,protein heterotrimerization,cellular response to amino acid stimulus
C57Bl6 / alb-SREBP-1c	P47740	AL3A2_MOUSE	P47740	P47740	-0.50017	0.50017	3.19049e-17	162	32	-29.2976	0.707024	-1.41438	C57Bl6	alb-SREBP-1c	Fatty aldehyde dehydrogenase	Aldh3a2	mitochondrion,mitochondrial inner membrane,peroxisome,endoplasmic reticulum,endoplasmic reticulum membrane,integral component of membrane,intracellular membrane-bounded organelle	aldehyde dehydrogenase (NAD) activity,aldehyde dehydrogenase [NAD(P)+] activity,long-chain-alcohol oxidase activity,long-chain-aldehyde dehydrogenase activity,medium-chain-aldehyde dehydrogenase activity	cellular aldehyde metabolic process,sesquiterpenoid metabolic process,central nervous system development,peripheral nervous system development,epidermis development,phytol metabolic process,oxidation-reduction process
C57Bl6 / alb-SREBP-1c	P60843	IF4A1_MOUSE	P60843	P60843	-0.499467	0.499467	0.00243579	47	18	-29.2632	0.707368	-1.41369	C57Bl6	alb-SREBP-1c	Eukaryotic initiation factor 4A-I	Eif4a1	nucleolus,cytoplasm	double-stranded RNA binding,translation initiation factor activity,ATP-dependent RNA helicase activity,protein binding,ATP binding	translational initiation,regulation of gene expression,RNA secondary structure unwinding
C57Bl6 / alb-SREBP-1c	Q61990;Q61990-2;Q61990-3	PCBP2_MOUSE	Q61990;Q61990-2;Q61990-3	Q61990;Q61990-2;Q61990-3	-0.499325	0.499325	0.207532	16	5	-29.2562	0.707438	-1.41355	C57Bl6	alb-SREBP-1c	Poly(rC)-binding protein 2;Isoform 2 of Poly(rC)-binding protein 2;Isoform 3 of Poly(rC)-binding protein 2	Pcbp2	nucleus,nucleoplasm,cytoplasm,cytosol;;	DNA binding,RNA binding,protein binding,enzyme binding,ubiquitin protein ligase binding,C-rich single-stranded DNA binding;;	viral RNA genome replication,proteasome-mediated ubiquitin-dependent protein catabolic process,innate immune response,negative regulation of defense response to virus,defense response to virus,IRES-dependent viral translational initiation;;
C57Bl6 / alb-SREBP-1c	Q91V64	ISOC1_MOUSE	Q91V64	Q91V64	-0.498642	0.498642	0.32003	40	11	-29.2227	0.707773	-1.41288	C57Bl6	alb-SREBP-1c	Isochorismatase domain-containing protein 1	Isoc1	cytoplasm,peroxisome	molecular_function,catalytic activity	biological_process,metabolic process
C57Bl6 / alb-SREBP-1c	Q9Z210	PX11B_MOUSE	Q9Z210	Q9Z210	-0.498068	0.498068	2.41147e-06	63	14	-29.1945	0.708055	-1.41232	C57Bl6	alb-SREBP-1c	Peroxisomal membrane protein 11B	Pex11b	mitochondrion,peroxisome,peroxisomal membrane,integral component of peroxisomal membrane,macromolecular complex	protein homodimerization activity	peroxisome organization,signal transduction,peroxisome fission,regulation of peroxisome size,protein homooligomerization
C57Bl6 / alb-SREBP-1c	Q78JT3	3HAO_MOUSE	Q78JT3	Q78JT3	-0.49781	0.49781	0.00102842	47	14	-29.1819	0.708181	-1.41207	C57Bl6	alb-SREBP-1c	3-hydroxyanthranilate 3,4-dioxygenase	Haao	cytosol	3-hydroxyanthranilate 3,4-dioxygenase activity,ferrous iron binding	NAD biosynthetic process,response to zinc ion,quinolinate biosynthetic process,response to cadmium ion,oxidation-reduction process,neuron cellular homeostasis
C57Bl6 / alb-SREBP-1c	O09012-2	PEX5_MOUSE	O09012-2	O09012-2	-0.494713	0.494713	0.134434	6	1	-29.0297	0.709703	-1.40904	C57Bl6	alb-SREBP-1c	Isoform 2 of Peroxisomal targeting signal 1 receptor	Pex5
C57Bl6 / alb-SREBP-1c	Q8K0R6	GLTD2_MOUSE	Q8K0R6	Q8K0R6	-0.493308	0.493308	0.574964	6	4	-28.9606	0.710394	-1.40767	C57Bl6	alb-SREBP-1c	Glycolipid transfer protein domain-containing protein 2	Gltpd2	cellular_component,cytoplasm	molecular_function,Requires Ontology	biological_process,Requires Ontology
C57Bl6 / alb-SREBP-1c	P47758	SRPRB_MOUSE	P47758	P47758	-0.493165	0.493165	7.8803e-06	41	14	-28.9535	0.710465	-1.40753	C57Bl6	alb-SREBP-1c	Signal recognition particle receptor subunit beta	Srprb	cytoplasm,signal recognition particle receptor complex,cytoplasmic microtubule,membrane,integral component of membrane	signal recognition particle binding,GTP binding
C57Bl6 / alb-SREBP-1c	Q9CQU0	TXD12_MOUSE	Q9CQU0	Q9CQU0	-0.492971	0.492971	0.310822	5	1	-28.944	0.71056	-1.40734	C57Bl6	alb-SREBP-1c	Thioredoxin domain-containing protein 12	Txndc12	endoplasmic reticulum,endoplasmic reticulum lumen	peptide disulfide oxidoreductase activity,protein-disulfide reductase (glutathione) activity	cell differentiation,cell redox homeostasis,oxidation-reduction process,negative regulation of cell death,negative regulation of endoplasmic reticulum stress-induced intrinsic apoptotic signaling pathway
C57Bl6 / alb-SREBP-1c	Q80ZK0	RT10_MOUSE	Q80ZK0	Q80ZK0	-0.491875	0.491875	0.606564	8	4	-28.89	0.7111	-1.40627	C57Bl6	alb-SREBP-1c	28S ribosomal protein S10, mitochondrial	Mrps10	mitochondrion,mitochondrial small ribosomal subunit	structural constituent of ribosome	translation
C57Bl6 / alb-SREBP-1c	Q60766;Q60766-2	IRGM1_MOUSE	Q60766;Q60766-2	Q60766;Q60766-2	-0.491495	0.491495	0.00199311	81	21	-28.8712	0.711288	-1.4059	C57Bl6	alb-SREBP-1c	Immunity-related GTPase family M protein 1;Isoform 2 of Immunity-related GTPase family M protein 1	Irgm1	Golgi membrane,autophagosome membrane,phagocytic cup,lysosome,lysosomal membrane,late endosome,autophagosome,endoplasmic reticulum,endoplasmic reticulum membrane,phagocytic vesicle membrane,late endosome membrane,cell projection,autolysosome,phagocytic vesicle;	GTPase activity,GTP binding;	autophagosome assembly,defense response,cellular response to interferon-beta,positive regulation of interferon-gamma-mediated signaling pathway,cellular response to interferon-gamma,autophagy of host cells involved in interaction with symbiont,positive regulation of autophagosome maturation;
C57Bl6 / alb-SREBP-1c	Q8VE09	TT39C_MOUSE	Q8VE09	Q8VE09	-0.491297	0.491297	0.600538	27	16	-28.8615	0.711385	-1.40571	C57Bl6	alb-SREBP-1c	Tetratricopeptide repeat protein 39C	Ttc39c	cellular_component	molecular_function	biological_process
C57Bl6 / alb-SREBP-1c	Q922Q8	LRC59_MOUSE	Q922Q8	Q922Q8	-0.490603	0.490603	8.38405e-09	53	15	-28.8272	0.711728	-1.40503	C57Bl6	alb-SREBP-1c	Leucine-rich repeat-containing protein 59	Lrrc59	nuclear envelope,endoplasmic reticulum,endoplasmic reticulum membrane,integral component of membrane,organelle membrane,mitochondrial nucleoid	cadherin binding
C57Bl6 / alb-SREBP-1c	Q8C0I1	ADAS_MOUSE	Q8C0I1	Q8C0I1	-0.490328	0.490328	0.0112424	114	33	-28.8137	0.711863	-1.40476	C57Bl6	alb-SREBP-1c	Alkyldihydroxyacetonephosphate synthase, peroxisomal	Agps	nucleolus,mitochondrion,peroxisome	alkylglycerone-phosphate synthase activity,oxidoreductase activity, acting on CH-OH group of donors,FAD binding	lipid biosynthetic process,ether lipid biosynthetic process,oxidation-reduction process
C57Bl6 / alb-SREBP-1c	Q6TCG2	PAQR9_MOUSE	Q6TCG2	Q6TCG2	-0.489563	0.489563	0.000963088	20	7	-28.7759	0.712241	-1.40402	C57Bl6	alb-SREBP-1c	Membrane progesterone receptor epsilon	Paqr9	plasma membrane,integral component of membrane	steroid hormone receptor activity,steroid binding	steroid hormone mediated signaling pathway,response to steroid hormone
C57Bl6 / alb-SREBP-1c	Q05D44	IF2P_MOUSE	Q05D44	Q05D44	-0.487763	0.487763	0.176434	9	4	-28.687	0.71313	-1.40227	C57Bl6	alb-SREBP-1c	Eukaryotic translation initiation factor 5B	Eif5b	cytoplasm	translation initiation factor activity,GTPase activity,GTP binding,metal ion binding	translational initiation,regulation of translational initiation
C57Bl6 / alb-SREBP-1c	Q9Z1Q2	ABHGA_MOUSE	Q9Z1Q2	Q9Z1Q2	-0.485933	0.485933	0.00347936	14	6	-28.5965	0.714035	-1.40049	C57Bl6	alb-SREBP-1c	Protein ABHD16A	Abhd16a	integral component of membrane	acylglycerol lipase activity	monoacylglycerol catabolic process,prostaglandin catabolic process
C57Bl6 / alb-SREBP-1c	P10922	H10_MOUSE	P10922	P10922	-0.485709	0.485709	0.588122	2	1	-28.5854	0.714146	-1.40027	C57Bl6	alb-SREBP-1c	Histone H1.0	H1f0	nucleosome,nuclear chromatin,nucleus,nuclear euchromatin,Golgi apparatus,actin cytoskeleton,nuclear body,nucleolus	AT DNA binding,double-stranded DNA binding,chromatin DNA binding	nucleosome assembly
C57Bl6 / alb-SREBP-1c	Q9CY50	SSRA_MOUSE	Q9CY50	Q9CY50	-0.485255	0.485255	0.00132233	14	4	-28.5629	0.714371	-1.39983	C57Bl6	alb-SREBP-1c	Translocon-associated protein subunit alpha	Ssr1	endoplasmic reticulum,endoplasmic reticulum membrane,integral component of membrane		cotranslational protein targeting to membrane
C57Bl6 / alb-SREBP-1c	O09012	PEX5_MOUSE	O09012	O09012	-0.4806	0.4806	1.30952e-21	160	36	-28.3321	0.716679	-1.39532	C57Bl6	alb-SREBP-1c	Peroxisomal targeting signal 1 receptor	Pex5	cytoplasm,mitochondrion,peroxisome,peroxisomal membrane,peroxisomal matrix,Golgi apparatus,cytosol,membrane,macromolecular complex	peroxisome targeting sequence binding,peroxisome matrix targeting signal-1 binding,protein C-terminus binding,enzyme binding,small GTPase binding,protein N-terminus binding	very long-chain fatty acid metabolic process,neuron migration,protein targeting to peroxisome,fatty acid beta-oxidation,mitochondrion organization,mitochondrial membrane organization,endoplasmic reticulum organization,peroxisome organization,protein import into peroxisome matrix,protein import into peroxisome matrix, docking,protein import into peroxisome matrix, translocation,cerebral cortex cel…
C57Bl6 / alb-SREBP-1c	P97930	KTHY_MOUSE	P97930	P97930	-0.480357	0.480357	0.60072	4	8	-28.32	0.7168	-1.39509	C57Bl6	alb-SREBP-1c	Thymidylate kinase	Dtymk	cytoplasm,mitochondrial intermembrane space,mitochondrial matrix	thymidylate kinase activity,ATP binding,uridylate kinase activity,nucleoside phosphate kinase activity	dUDP biosynthetic process,dTDP biosynthetic process,dTTP biosynthetic process,nucleotide biosynthetic process,response to estrogen,myoblast differentiation,response to cadmium ion,nucleotide phosphorylation,nucleoside monophosphate phosphorylation,cellular response to growth factor stimulus
C57Bl6 / alb-SREBP-1c	Q8BXV2	BRI3B_MOUSE	Q8BXV2	Q8BXV2	-0.479993	0.479993	0.109394	6	2	-28.3019	0.716981	-1.39474	C57Bl6	alb-SREBP-1c	BRI3-binding protein	Bri3bp	mitochondrion,mitochondrial outer membrane,integral component of membrane	molecular_function	biological_process
C57Bl6 / alb-SREBP-1c	Q9EP72	EMC7_MOUSE	Q9EP72	Q9EP72	-0.47969	0.47969	0.00475213	12	5	-28.2868	0.717132	-1.39444	C57Bl6	alb-SREBP-1c	ER membrane protein complex subunit 7	Emc7	integral component of membrane,ER membrane protein complex	molecular_function,carbohydrate binding	biological_process
C57Bl6 / alb-SREBP-1c	P27786	CP17A_MOUSE	P27786	P27786	-0.477804	0.477804	0.444329	29	18	-28.193	0.71807	-1.39262	C57Bl6	alb-SREBP-1c	Steroid 17-alpha-hydroxylase/17,20 lyase	Cyp17a1	mitochondrion,membrane,axon,neuronal cell body	steroid 17-alpha-monooxygenase activity,iron ion binding,heme binding,17-alpha-hydroxyprogesterone aldolase activity	glucocorticoid biosynthetic process,steroid metabolic process,hormone biosynthetic process,progesterone metabolic process,oxidation-reduction process
C57Bl6 / alb-SREBP-1c	Q9WTL7	LYPA2_MOUSE	Q9WTL7	Q9WTL7	-0.477486	0.477486	0.390346	5	2	-28.1772	0.718228	-1.39232	C57Bl6	alb-SREBP-1c	Acyl-protein thioesterase 2	Lypla2	cytoplasm,Golgi stack	palmitoyl-(protein) hydrolase activity,cadherin binding,carboxylic ester hydrolase activity	protein depalmitoylation,fatty acid metabolic process
C57Bl6 / alb-SREBP-1c	Q9DAW9	CNN3_MOUSE	Q9DAW9	Q9DAW9	-0.477045	0.477045	0.343458	2	2	-28.1552	0.718448	-1.39189	C57Bl6	alb-SREBP-1c	Calponin-3	Cnn3	cytosol,cell-cell adherens junction,postsynaptic density,actin cytoskeleton,neuronal cell body,dendritic spine	actin binding,protein binding,calmodulin binding,microtubule binding,cadherin binding involved in cell-cell adhesion	epithelial cell differentiation,actomyosin structure organization,negative regulation of ATPase activity,cell-cell adhesion
C57Bl6 / alb-SREBP-1c	Q9QXE0	HACL1_MOUSE	Q9QXE0	Q9QXE0	-0.476968	0.476968	5.68699e-12	264	38	-28.1514	0.718486	-1.39182	C57Bl6	alb-SREBP-1c	2-hydroxyacyl-CoA lyase 1	Hacl1	peroxisome	magnesium ion binding,receptor binding,lyase activity,carbon-carbon lyase activity,thiamine pyrophosphate binding,identical protein binding,cofactor binding	fatty acid alpha-oxidation,lipid metabolic process,protein oligomerization
C57Bl6 / alb-SREBP-1c	Q8BK63;Q8BK63-2	KC1A_MOUSE	Q8BK63;Q8BK63-2	Q8BK63;Q8BK63-2	-0.475866	0.475866	0.41661	3	1	-28.0965	0.719035	-1.39075	C57Bl6	alb-SREBP-1c	Casein kinase I isoform alpha;Isoform 2 of Casein kinase I isoform alpha	Csnk1a1	condensed chromosome kinetochore,nucleus,cytoplasm,centrosome,cytosol,cilium,nuclear speck,beta-catenin destruction complex,ciliary basal body,mRNA cleavage and polyadenylation specificity factor complex,keratin filament;	protein kinase activity,protein serine/threonine kinase activity,ATP binding;	cell morphogenesis,protein phosphorylation,phagocytosis,Golgi organization,cell cycle,regulation of cell shape,Wnt signaling pathway,peptidyl-serine phosphorylation,positive regulation of proteasomal ubiquitin-dependent protein catabolic process,intermediate filament cytoskeleton organization,cell division,negative regulation of canonical Wnt signaling pathway,regulation of GTP binding;
C57Bl6 / alb-SREBP-1c	Q9Z2V4	PCKGC_MOUSE	Q9Z2V4	Q9Z2V4	-0.475272	0.475272	0.0484088	18	9	-28.0669	0.719331	-1.39018	C57Bl6	alb-SREBP-1c	Phosphoenolpyruvate carboxykinase, cytosolic [GTP]	Pck1	cytosol	magnesium ion binding,phosphoenolpyruvate carboxykinase activity,phosphoenolpyruvate carboxykinase (GTP) activity,GTP binding,GDP binding,manganese ion binding,carboxylic acid binding	glucose metabolic process,gluconeogenesis,oxaloacetate metabolic process,internal protein amino acid acetylation,lipid metabolic process,aging,response to activity,response to lipopolysaccharide,response to insulin,cellular response to insulin stimulus,glucose homeostasis,glycerol biosynthetic process from pyruvate,cellular response to potassium ion starvation,positive regulation of transcription…
C57Bl6 / alb-SREBP-1c	Q8BYK4	RDH12_MOUSE	Q8BYK4	Q8BYK4	-0.475134	0.475134	0.33708	3	1	-28.06	0.7194	-1.39005	C57Bl6	alb-SREBP-1c	Retinol dehydrogenase 12	Rdh12	intracellular	retinol dehydrogenase activity,oxidoreductase activity	visual perception,retinol metabolic process,response to stimulus,oxidation-reduction process
C57Bl6 / alb-SREBP-1c	P35278	RAB5C_MOUSE	P35278	P35278	-0.474561	0.474561	0.00132233	45	12	-28.0314	0.719686	-1.3895	C57Bl6	alb-SREBP-1c	Ras-related protein Rab-5C	Rab5c	endosome,early endosome,lipid particle,plasma membrane,endocytic vesicle,early endosome membrane,melanosome	GTPase activity,protein binding,GTP binding,GDP binding	endosome organization,protein transport,regulation of endocytosis,plasma membrane to endosome transport
C57Bl6 / alb-SREBP-1c	Q6PA06	ATLA2_MOUSE	Q6PA06	Q6PA06	-0.473925	0.473925	0.00103243	28	15	-27.9997	0.720003	-1.38888	C57Bl6	alb-SREBP-1c	Atlastin-2	Atl2	endoplasmic reticulum,integral component of membrane,endoplasmic reticulum tubular network membrane	GTPase activity,protein binding,GTP binding,identical protein binding	endoplasmic reticulum organization,Golgi organization,protein homooligomerization,endoplasmic reticulum tubular network membrane organization
C57Bl6 / alb-SREBP-1c	P02088	HBB1_MOUSE	P02088	P02088	-0.473888	0.473888	0.0199422	42	9	-27.9978	0.720022	-1.38885	C57Bl6	alb-SREBP-1c	Hemoglobin subunit beta-1	Hbb-b1	hemoglobin complex,myelin sheath	oxygen transporter activity,oxygen binding,heme binding,metal ion binding	regulation of eIF2 alpha phosphorylation by heme,oxygen transport,hemopoiesis,erythrocyte development
C57Bl6 / alb-SREBP-1c	Q8VCR2-2	DHB13_MOUSE	Q8VCR2-2	Q8VCR2-2	-0.473087	0.473087	0.127992	75	21	-27.9579	0.720421	-1.38808	C57Bl6	alb-SREBP-1c	Isoform 2 of 17-beta-hydroxysteroid dehydrogenase 13	Hsd17b13
C57Bl6 / alb-SREBP-1c	Q91YQ5	RPN1_MOUSE	Q91YQ5	Q91YQ5	-0.471881	0.471881	5.35768e-18	128	36	-27.8976	0.721024	-1.38692	C57Bl6	alb-SREBP-1c	Dolichyl-diphosphooligosaccharide--protein glycosyltransferase subunit 1	Rpn1	endoplasmic reticulum,endoplasmic reticulum membrane,rough endoplasmic reticulum,cytosol,oligosaccharyltransferase complex,integral component of membrane,melanosome	dolichyl-diphosphooligosaccharide-protein glycotransferase activity	protein N-linked glycosylation via asparagine
C57Bl6 / alb-SREBP-1c	Q9JIW9	RALB_MOUSE	Q9JIW9	Q9JIW9	-0.471718	0.471718	0.0555852	6	3	-27.8895	0.721105	-1.38676	C57Bl6	alb-SREBP-1c	Ras-related protein Ral-B	Ralb	plasma membrane,midbody,exocyst,autophagosome	GTPase activity,GTP binding,GDP binding,ubiquitin protein ligase binding,ATPase binding	regulation of exocyst assembly,positive regulation of protein phosphorylation,apoptotic process,cell cycle,Ras protein signal transduction,cellular response to starvation,negative regulation of protein binding,positive regulation of protein binding,cell division,regulation of exocyst localization,cellular response to exogenous dsRNA,positive regulation of protein serine/threonine kinase activity,…
C57Bl6 / alb-SREBP-1c	P61750	ARF4_MOUSE	P61750	P61750	-0.471635	0.471635	0.0673803	12	2	-27.8853	0.721147	-1.38668	C57Bl6	alb-SREBP-1c	ADP-ribosylation factor 4	Arf4	cytoplasm,Golgi apparatus,cytosol,plasma membrane,ruffle membrane,dendritic spine	epidermal growth factor receptor binding,protein binding,GTP binding	protein ADP-ribosylation,retrograde vesicle-mediated transport, Golgi to ER,epidermal growth factor receptor signaling pathway,brain development,learning,protein transport,cell migration,activation of phospholipase D activity,negative regulation of apoptotic process,apical protein localization,establishment or maintenance of epithelial cell apical/basal polarity,positive regulation of transcripti…
C57Bl6 / alb-SREBP-1c	Q9D0M5	DYL2_MOUSE	Q9D0M5	Q9D0M5	-0.471533	0.471533	0.305353	13	4	-27.8802	0.721198	-1.38658	C57Bl6	alb-SREBP-1c	Dynein light chain 2, cytoplasmic	Dynll2	cytoplasm,centrosome,cytoplasmic dynein complex,microtubule,myosin V complex	protein binding,cytoskeletal protein binding,protein homodimerization activity,dynein intermediate chain binding,protein heterodimerization activity,dynein light intermediate chain binding,ATP-dependent microtubule motor activity, plus-end-directed	transport along microtubule,cilium morphogenesis,positive regulation of ATP-dependent microtubule motor activity, plus-end-directed
C57Bl6 / alb-SREBP-1c	Q920L1	FADS1_MOUSE	Q920L1	Q920L1	-0.470007	0.470007	0.184343	19	7	-27.8039	0.721961	-1.38512	C57Bl6	alb-SREBP-1c	Fatty acid desaturase 1	Fads1	nucleus,mitochondrion,endoplasmic reticulum membrane,integral component of membrane	linoleoyl-CoA desaturase activity,oxidoreductase activity	unsaturated fatty acid biosynthetic process,aging,cellular response to starvation,response to sucrose,response to organic cyclic compound,arachidonic acid metabolic process,response to insulin,response to vitamin A,response to isolation stress,long-chain fatty acid biosynthetic process,oxidation-reduction process
C57Bl6 / alb-SREBP-1c	Q3U3R4;Q3U3R4-2;Q3U3R4-3	LMF1_MOUSE	Q3U3R4;Q3U3R4-2;Q3U3R4-3	Q3U3R4;Q3U3R4-2;Q3U3R4-3	-0.46997	0.46997	0.134175	10	3	-27.802	0.72198	-1.38508	C57Bl6	alb-SREBP-1c	Lipase maturation factor 1;Isoform 2 of Lipase maturation factor 1;Isoform 3 of Lipase maturation factor 1	Lmf1	endoplasmic reticulum membrane,Golgi apparatus,integral component of membrane;;	protein binding;;	triglyceride metabolic process,ER to Golgi vesicle-mediated transport,protein secretion,protein glycosylation in Golgi,chylomicron remnant clearance,positive regulation of lipoprotein lipase activity,protein maturation,regulation of cholesterol metabolic process,regulation of triglyceride metabolic process;;
C57Bl6 / alb-SREBP-1c	Q6P6M5	PX11C_MOUSE	Q6P6M5	Q6P6M5	-0.469264	0.469264	5.68157e-07	65	14	-27.7667	0.722333	-1.3844	C57Bl6	alb-SREBP-1c	Peroxisomal membrane protein 11C	Pex11g	peroxisome,integral component of peroxisomal membrane,intrinsic component of peroxisomal membrane,macromolecular complex	molecular_function	peroxisome fission,regulation of peroxisome size
C57Bl6 / alb-SREBP-1c	Q8C6I2	SDHF2_MOUSE	Q8C6I2	Q8C6I2	-0.468903	0.468903	0.369138	3	2	-27.7486	0.722514	-1.38406	C57Bl6	alb-SREBP-1c	Succinate dehydrogenase assembly factor 2, mitochondrial	Sdhaf2	nucleolus,mitochondrion,mitochondrial matrix,cytosol	molecular_function	tricarboxylic acid cycle,mitochondrial electron transport, succinate to ubiquinone,protein dephosphorylation,negative regulation of epithelial to mesenchymal transition,protein-FAD linkage,mitochondrial respiratory chain complex II assembly,negative regulation of canonical Wnt signaling pathway
C57Bl6 / alb-SREBP-1c	Q99N84	RT18B_MOUSE	Q99N84	Q99N84	-0.468334	0.468334	0.33538	5	7	-27.7201	0.722799	-1.38351	C57Bl6	alb-SREBP-1c	28S ribosomal protein S18b, mitochondrial	Mrps18b	nucleoplasm,mitochondrion,mitochondrial small ribosomal subunit,cell junction	structural constituent of ribosome	mitochondrial translation
C57Bl6 / alb-SREBP-1c	Q61712	DNJC1_MOUSE	Q61712	Q61712	-0.468298	0.468298	0.379498	3	2	-27.7183	0.722817	-1.38348	C57Bl6	alb-SREBP-1c	DnaJ homolog subfamily C member 1	Dnajc1	nucleus,endoplasmic reticulum,endoplasmic reticulum lumen,endoplasmic reticulum membrane,plasma membrane,integral component of membrane,nuclear membrane	DNA binding,protein binding,ribosome binding,chaperone binding	regulation of translation,protein folding,regulation of protein secretion
C57Bl6 / alb-SREBP-1c	P35980	RL18_MOUSE	P35980	P35980	-0.468226	0.468226	0.414594	19	8	-27.7147	0.722853	-1.38341	C57Bl6	alb-SREBP-1c	60S ribosomal protein L18	Rpl18	nucleolus,endoplasmic reticulum,rough endoplasmic reticulum,cytosol,cytosolic large ribosomal subunit,polysomal ribosome	RNA binding,structural constituent of ribosome	cytoplasmic translation,translation
C57Bl6 / alb-SREBP-1c	Q99MD6	TRXR3_MOUSE	Q99MD6	Q99MD6	-0.466677	0.466677	0.0218788	75	22	-27.6371	0.723629	-1.38192	C57Bl6	alb-SREBP-1c	Thioredoxin reductase 3	Txnrd3	nucleoplasm,mitochondrion,endoplasmic reticulum,cytosol	thioredoxin-disulfide reductase activity,protein binding,electron carrier activity,protein disulfide oxidoreductase activity,flavin adenine dinucleotide binding	response to oxygen radical,glutathione metabolic process,multicellular organism development,spermatogenesis,electron transport chain,cell differentiation,cell redox homeostasis,cellular oxidant detoxification
C57Bl6 / alb-SREBP-1c	Q9CZW4	ACSL3_MOUSE	Q9CZW4	Q9CZW4	-0.465942	0.465942	0.510847	3	1	-27.6002	0.723998	-1.38122	C57Bl6	alb-SREBP-1c	Long-chain-fatty-acid--CoA ligase 3	Acsl3	mitochondrial outer membrane,peroxisomal membrane,endoplasmic reticulum,endoplasmic reticulum membrane,Golgi apparatus,lipid particle,integral component of membrane,perinuclear region of cytoplasm	long-chain fatty acid-CoA ligase activity,ATP binding,protein kinase binding,protein domain specific binding,decanoate--CoA ligase activity	long-chain fatty acid metabolic process,fatty acid biosynthetic process,brain development,response to nutrient,response to organic cyclic compound,very-low-density lipoprotein particle assembly,positive regulation of Golgi to plasma membrane protein transport,long-chain fatty acid import,positive regulation of secretion,positive regulation of phosphatidylcholine biosynthetic process
C57Bl6 / alb-SREBP-1c	Q8BGB8	COQ4_MOUSE	Q8BGB8	Q8BGB8	-0.463745	0.463745	0.148489	2	5	-27.4899	0.725101	-1.37912	C57Bl6	alb-SREBP-1c	Ubiquinone biosynthesis protein COQ4 homolog, mitochondrial	Coq4	mitochondrion,mitochondrial inner membrane,macromolecular complex	molecular_function	ubiquinone biosynthetic process
C57Bl6 / alb-SREBP-1c	Q99JI4	PSMD6_MOUSE	Q99JI4	Q99JI4	-0.462513	0.462513	0.446882	3	1	-27.4279	0.725721	-1.37794	C57Bl6	alb-SREBP-1c	26S proteasome non-ATPase regulatory subunit 6	Psmd6	proteasome complex,proteasome regulatory particle,proteasome accessory complex	enzyme regulator activity	proteasome-mediated ubiquitin-dependent protein catabolic process,regulation of catalytic activity
C57Bl6 / alb-SREBP-1c	Q8BKE6	CP20A_MOUSE	Q8BKE6	Q8BKE6	-0.461754	0.461754	0.300081	7	3	-27.3897	0.726103	-1.37722	C57Bl6	alb-SREBP-1c	Cytochrome P450 20A1	Cyp20a1	integral component of membrane	monooxygenase activity,iron ion binding,oxidoreductase activity, acting on paired donors, with incorporation or reduction of molecular oxygen,heme binding	oxidation-reduction process
C57Bl6 / alb-SREBP-1c	Q3U276	SDHF1_MOUSE	Q3U276	Q3U276	-0.461692	0.461692	0.298753	2	1	-27.3866	0.726134	-1.37716	C57Bl6	alb-SREBP-1c	Succinate dehydrogenase assembly factor 1, mitochondrial	Sdhaf1	mitochondrion,mitochondrial matrix	molecular_function	mitochondrial respiratory chain complex II assembly
C57Bl6 / alb-SREBP-1c	P58710	GGLO_MOUSE	P58710	P58710	-0.461041	0.461041	5.87839e-09	126	27	-27.3538	0.726462	-1.37653	C57Bl6	alb-SREBP-1c	L-gulonolactone oxidase	Gulo	endoplasmic reticulum membrane,integral component of membrane,organelle membrane	D-arabinono-1,4-lactone oxidase activity,L-gulonolactone oxidase activity,flavin adenine dinucleotide binding	L-ascorbic acid biosynthetic process,oxidation-reduction process
C57Bl6 / alb-SREBP-1c	Q9DB73	NB5R1_MOUSE	Q9DB73	Q9DB73	-0.460344	0.460344	0.174672	13	6	-27.3187	0.726813	-1.37587	C57Bl6	alb-SREBP-1c	NADH-cytochrome b5 reductase 1	Cyb5r1	mitochondrion,integral component of membrane	cytochrome-b5 reductase activity, acting on NAD(P)H,oxidoreductase activity	sterol biosynthetic process,oxidation-reduction process,positive regulation of protein targeting to mitochondrion
C57Bl6 / alb-SREBP-1c	Q9CRD2	EMC2_MOUSE	Q9CRD2	Q9CRD2	-0.459287	0.459287	0.0230142	20	8	-27.2654	0.727346	-1.37486	C57Bl6	alb-SREBP-1c	ER membrane protein complex subunit 2	Emc2	nucleus,cytoplasm,mitochondrion,endoplasmic reticulum,ER membrane protein complex	molecular_function	protein folding in endoplasmic reticulum
C57Bl6 / alb-SREBP-1c	P34884	MIF_MOUSE	P34884	P34884	-0.458929	0.458929	0.362008	5	2	-27.2474	0.727526	-1.37452	C57Bl6	alb-SREBP-1c	Macrophage migration inhibitory factor	Mif	extracellular region,extracellular space,nucleoplasm,cytosol,cell surface,myelin sheath	protease binding,dopachrome isomerase activity,receptor binding,cytokine activity,cytokine receptor binding,chemoattractant activity,identical protein binding,phenylpyruvate tautomerase activity	prostaglandin biosynthetic process,positive regulation of protein phosphorylation,positive regulation of adaptive immune response,negative regulation of mature B cell apoptotic process,inflammatory response,cell surface receptor signaling pathway,cell aging,cell proliferation,regulation of receptor activity,negative regulation of gene expression,positive regulation of protein kinase A signaling,n…
C57Bl6 / alb-SREBP-1c	P17879;Q61696	HS71B_MOUSE;HS71A_MOUSE	P17879;Q61696	P17879;Q61696	-0.458901	0.458901	0.359236	8	4	-27.246	0.72754	-1.37449	C57Bl6	alb-SREBP-1c	Heat shock 70 kDa protein 1B;Heat shock 70 kDa protein 1A	Hspa1b;Hspa1a	zona pellucida receptor complex,intracellular,mitochondrion,mitochondrial matrix,centrosome,cell body;nucleus,cytoplasm,mitochondrion,centrosome,centriole,cytosol,inclusion body,aggresome,nuclear speck,macromolecular complex,perinuclear region of cytoplasm,ubiquitin ligase complex,COP9 signalosome	protein binding,ATP binding;RNA polymerase II transcription corepressor activity,G-protein coupled receptor binding,receptor binding,protein binding,ATP binding,ATPase activity,enzyme binding,heat shock protein binding,denatured protein binding,ubiquitin protein ligase binding,ATPase activity, coupled,histone deacetylase binding,protein binding involved in protein folding,cadherin binding,protein…	binding of sperm to zona pellucida,response to heat,protein refolding,negative regulation of apoptotic process,negative regulation of cysteine-type endopeptidase activity involved in apoptotic process,positive regulation of microtubule nucleation,regulation of mitotic spindle assembly;telomere maintenance,DNA repair,mRNA catabolic process,response to unfolded protein,negative regulation of cell p…
C57Bl6 / alb-SREBP-1c	Q920A7	AFG31_MOUSE	Q920A7	Q920A7	-0.45762	0.45762	0.535848	32	22	-27.1814	0.728186	-1.37327	C57Bl6	alb-SREBP-1c	AFG3-like protein 1	Afg3l1	mitochondrion,mitochondrial inner membrane,m-AAA complex	metalloendopeptidase activity,protein binding,ATP binding,zinc ion binding	mitochondrion organization,mitochondrial fusion,protein processing,mitochondrial protein processing,cristae formation
C57Bl6 / alb-SREBP-1c	Q9DBG6	RPN2_MOUSE	Q9DBG6	Q9DBG6	-0.455632	0.455632	1.57468e-12	91	28	-27.0809	0.729191	-1.37138	C57Bl6	alb-SREBP-1c	Dolichyl-diphosphooligosaccharide--protein glycosyltransferase subunit 2	Rpn2	autophagosome membrane,rough endoplasmic reticulum,oligosaccharyltransferase complex,integral component of membrane	ribosome binding,dolichyl-diphosphooligosaccharide-protein glycotransferase activity	protein N-linked glycosylation,aging,response to drug
C57Bl6 / alb-SREBP-1c	O88428	PAPS2_MOUSE	O88428	O88428	-0.454481	0.454481	0.0791245	17	6	-27.0227	0.729773	-1.37029	C57Bl6	alb-SREBP-1c	Bifunctional 3'-phosphoadenosine 5'-phosphosulfate synthase 2	Papss2		adenylylsulfate kinase activity,sulfate adenylyltransferase (ATP) activity,ATP binding,nucleotidyltransferase activity	sulfate assimilation,blood coagulation,phosphorylation,3'-phosphoadenosine 5'-phosphosulfate biosynthetic process,bone development
C57Bl6 / alb-SREBP-1c	P14152	MDHC_MOUSE	P14152	P14152	-0.454225	0.454225	0.021923	55	13	-27.0098	0.729902	-1.37005	C57Bl6	alb-SREBP-1c	Malate dehydrogenase, cytoplasmic	Mdh1	mitochondrion,cytosol,myelin sheath	L-malate dehydrogenase activity,NAD binding	carbohydrate metabolic process,tricarboxylic acid cycle,oxaloacetate metabolic process,malate metabolic process,NADH metabolic process
C57Bl6 / alb-SREBP-1c	Q9JKJ9	CP39A_MOUSE	Q9JKJ9	Q9JKJ9	-0.454174	0.454174	0.586003	3	1	-27.0072	0.729928	-1.37	C57Bl6	alb-SREBP-1c	24-hydroxycholesterol 7-alpha-hydroxylase	Cyp39a1	endoplasmic reticulum membrane,organelle membrane,intracellular membrane-bounded organelle	iron ion binding,steroid 7-alpha-hydroxylase activity,oxysterol 7-alpha-hydroxylase activity,heme binding	bile acid biosynthetic process,cholesterol catabolic process,digestion,bile acid catabolic process,oxidation-reduction process
C57Bl6 / alb-SREBP-1c	Q9CZE3	RAB32_MOUSE	Q9CZE3	Q9CZE3	-0.453078	0.453078	0.254062	13	4	-26.9517	0.730483	-1.36896	C57Bl6	alb-SREBP-1c	Ras-related protein Rab-32	Rab32	mitochondrion,mitochondrial outer membrane,early endosome,endoplasmic reticulum,trans-Golgi network,membrane,phagocytic vesicle membrane,melanosome membrane,melanosome,ER-mitochondrion membrane contact site,phagocytic vesicle	GTPase activity,protein binding,GTP binding,GTP-dependent protein binding,AP-1 adaptor complex binding,AP-3 adaptor complex binding,BLOC-2 complex binding	mitochondrion organization,vesicle-mediated transport,antigen processing and presentation,melanosome organization,endosome to melanosome transport,protein localization to membrane,phagosome maturation,melanosome assembly
C57Bl6 / alb-SREBP-1c	P05977;P05977-2	MYL1_MOUSE	P05977;P05977-2	P05977;P05977-2	-0.452932	0.452932	0.0138345	18	7	-26.9444	0.730556	-1.36882	C57Bl6	alb-SREBP-1c	Myosin light chain 1/3, skeletal muscle isoform;Isoform MLC3 of Myosin light chain 1/3, skeletal muscle isoform	Myl1	myosin complex,myofibril;	calcium ion binding;	muscle contraction,cardiac muscle contraction;
C57Bl6 / alb-SREBP-1c	P80316	TCPE_MOUSE	P80316	P80316	-0.450956	0.450956	0.362504	23	10	-26.8442	0.731558	-1.36695	C57Bl6	alb-SREBP-1c	T-complex protein 1 subunit epsilon	Cct5	zona pellucida receptor complex,nucleolus,centrosome,cytosol,chaperonin-containing T-complex,microtubule,myelin sheath,cell body	mRNA 3'-UTR binding,protein binding,ATP binding,G-protein beta-subunit binding,protein binding involved in protein folding,mRNA 5'-UTR binding,beta-tubulin binding,unfolded protein binding	'de novo' protein folding,binding of sperm to zona pellucida,response to virus,positive regulation of telomere maintenance via telomerase,protein stabilization,chaperone-mediated protein folding,toxin transport,positive regulation of establishment of protein localization to telomere,positive regulation of protein localization to Cajal body,positive regulation of telomerase RNA localization to Caj…
C57Bl6 / alb-SREBP-1c	Q9CQS8	SC61B_MOUSE	Q9CQS8	Q9CQS8	-0.44822	0.44822	0.00777622	9	2	-26.7053	0.732947	-1.36436	C57Bl6	alb-SREBP-1c	Protein transport protein Sec61 subunit beta	Sec61b	endoplasmic reticulum,Sec61 translocon complex,membrane,integral component of membrane,endoplasmic reticulum Sec complex,endoplasmic reticulum quality control compartment	ARF guanyl-nucleotide exchange factor activity,protein binding,ribosome binding,epidermal growth factor binding,P-P-bond-hydrolysis-driven protein transmembrane transporter activity	protein import into nucleus, translocation,SRP-dependent cotranslational protein targeting to membrane, translocation,ER-associated ubiquitin-dependent protein catabolic process,retrograde protein transport, ER to cytosol,posttranslational protein targeting to membrane, translocation
C57Bl6 / alb-SREBP-1c	P70441	NHRF1_MOUSE	P70441	P70441	-0.448103	0.448103	1.07994e-05	85	23	-26.6994	0.733006	-1.36425	C57Bl6	alb-SREBP-1c	Na(+)/H(+) exchange regulatory cofactor NHE-RF1	Slc9a3r1	ruffle,cytoplasm,microvillus,endomembrane system,membrane,apical plasma membrane,filopodium,brush border membrane,microvillus membrane,stereocilium,stereocilium tip,membrane raft,apical part of cell,perinuclear region of cytoplasm,cell periphery,sperm midpiece	receptor binding,protein binding,beta-catenin binding,chloride channel regulator activity,phosphatase binding,PDZ domain binding,beta-2 adrenergic receptor binding,protein complex scaffold,protein self-association,myosin II binding,dopamine receptor binding,growth factor receptor binding	renal sodium ion transport,nuclear migration,adenylate cyclase-activating dopamine receptor signaling pathway,sensory perception of sound,negative regulation of cell proliferation,regulation of cell shape,regulation of cell size,negative regulation of platelet-derived growth factor receptor signaling pathway,negative regulation of sodium ion transport,negative regulation of phosphatidylinositol 3…
C57Bl6 / alb-SREBP-1c	P61079;P62838	UB2D3_MOUSE;UB2D2_MOUSE	P61079;P62838	P61079;P62838	-0.447822	0.447822	0.476323	3	1	-26.6851	0.733149	-1.36398	C57Bl6	alb-SREBP-1c	Ubiquitin-conjugating enzyme E2 D3;Ubiquitin-conjugating enzyme E2 D2	Ube2d3;Ube2d2	plasma membrane,endosome membrane;ubiquitin ligase complex,macromolecular complex	ubiquitin-protein transferase activity,protein binding,ATP binding,ubiquitin conjugating enzyme activity;ubiquitin-protein transferase activity,protein binding,ATP binding,ubiquitin conjugating enzyme activity	protein polyubiquitination,DNA repair,protein monoubiquitination,apoptotic process,protein ubiquitination,proteasome-mediated ubiquitin-dependent protein catabolic process,protein autoubiquitination,protein K48-linked ubiquitination,protein K11-linked ubiquitination,positive regulation of protein targeting to mitochondrion;protein polyubiquitination,protein ubiquitination,protein autoubiquitinati…
C57Bl6 / alb-SREBP-1c	Q61129	CFAI_MOUSE	Q61129	Q61129	-0.447127	0.447127	0.557579	3	3	-26.6498	0.733502	-1.36332	C57Bl6	alb-SREBP-1c	Complement factor I	Cfi	extracellular space,membrane	serine-type endopeptidase activity,scavenger receptor activity,metal ion binding	proteolysis,receptor-mediated endocytosis,complement activation, classical pathway,innate immune response
C57Bl6 / alb-SREBP-1c	Q9QYR7	ACOT3_MOUSE	Q9QYR7	Q9QYR7	-0.446635	0.446635	0.14222	79	24	-26.6248	0.733752	-1.36286	C57Bl6	alb-SREBP-1c	Acyl-coenzyme A thioesterase 3	Acot3	peroxisome,cytosol	palmitoyl-CoA hydrolase activity,acyl-CoA hydrolase activity,carboxylic ester hydrolase activity,Requires Ontology	very long-chain fatty acid metabolic process,long-chain fatty acid metabolic process,acyl-CoA metabolic process,saturated monocarboxylic acid metabolic process,unsaturated monocarboxylic acid metabolic process
C57Bl6 / alb-SREBP-1c	Q63886	UD11_MOUSE	Q63886	Q63886	-0.446275	0.446275	5.94569e-05	92	14	-26.6065	0.733935	-1.36252	C57Bl6	alb-SREBP-1c	UDP-glucuronosyltransferase 1-1	Ugt1a1	endoplasmic reticulum,endoplasmic reticulum membrane,integral component of plasma membrane,endoplasmic reticulum chaperone complex,cytochrome complex	retinoic acid binding,enzyme inhibitor activity,steroid binding,glucuronosyltransferase activity,enzyme binding,protein homodimerization activity,protein heterodimerization activity	liver development,acute-phase response,response to nutrient,animal organ regeneration,response to lipopolysaccharide,response to starvation,negative regulation of catalytic activity,flavone metabolic process,cellular glucuronidation,flavonoid glucuronidation,xenobiotic glucuronidation,biphenyl catabolic process,cellular response to ethanol,cellular response to glucocorticoid stimulus,cellular res…
C57Bl6 / alb-SREBP-1c	Q80WJ7	LYRIC_MOUSE	Q80WJ7	Q80WJ7	-0.445676	0.445676	0.153113	24	8	-26.576	0.73424	-1.36195	C57Bl6	alb-SREBP-1c	Protein LYRIC	Mtdh	fibrillar center,nucleus,nucleolus,cytoplasm,endoplasmic reticulum,endoplasmic reticulum membrane,bicellular tight junction,integral component of membrane,apical plasma membrane,nuclear body,nuclear membrane,intercellular canaliculus,perinuclear region of cytoplasm	RNA polymerase II transcription factor binding,transcription coactivator activity,double-stranded RNA binding,protein binding,NF-kappaB binding	negative regulation of transcription from RNA polymerase II promoter,positive regulation of autophagy,lipopolysaccharide-mediated signaling pathway,negative regulation of apoptotic process,positive regulation of I-kappaB kinase/NF-kappaB signaling,positive regulation of angiogenesis,positive regulation of NF-kappaB transcription factor activity,positive regulation of protein kinase B signaling,bi…
C57Bl6 / alb-SREBP-1c	P61089	UBE2N_MOUSE	P61089	P61089	-0.44513	0.44513	0.0763035	20	7	-26.5482	0.734518	-1.36144	C57Bl6	alb-SREBP-1c	Ubiquitin-conjugating enzyme E2 N	Ube2n	ubiquitin ligase complex,fibrillar center,nucleus,cytoplasm,UBC13-MMS2 complex,macromolecular complex,UBC13-UEV1A complex	ubiquitin-protein transferase activity,protein binding,ATP binding,ubiquitin protein ligase binding,ubiquitin binding,ubiquitin protein ligase activity,ubiquitin conjugating enzyme activity	double-strand break repair via homologous recombination,DNA double-strand break processing,postreplication repair,ubiquitin-dependent protein catabolic process,protein ubiquitination,histone ubiquitination,positive regulation of histone modification,regulation of histone ubiquitination,positive regulation of I-kappaB kinase/NF-kappaB signaling,positive regulation of DNA repair,T cell receptor sig…
C57Bl6 / alb-SREBP-1c	Q31125	S39A7_MOUSE	Q31125	Q31125	-0.444258	0.444258	0.0209015	6	2	-26.5038	0.734962	-1.36061	C57Bl6	alb-SREBP-1c	Zinc transporter SLC39A7	Slc39a7	nucleoplasm,endoplasmic reticulum,endoplasmic reticulum membrane,Golgi apparatus,integral component of membrane	zinc ion transmembrane transporter activity,protein binding	cellular zinc ion homeostasis,zinc II ion transmembrane transport
C57Bl6 / alb-SREBP-1c	Q9CYN2	SPCS2_MOUSE	Q9CYN2	Q9CYN2	-0.444185	0.444185	0.0372546	28	10	-26.5	0.735	-1.36055	C57Bl6	alb-SREBP-1c	Signal peptidase complex subunit 2	Spcs2	signal peptidase complex,integral component of membrane,organelle membrane	peptidase activity	signal peptide processing,protein targeting to ER
C57Bl6 / alb-SREBP-1c	Q6NZJ6;Q6NZJ6-2	IF4G1_MOUSE	Q6NZJ6;Q6NZJ6-2	Q6NZJ6;Q6NZJ6-2	-0.444179	0.444179	0.298753	10	4	-26.4998	0.735002	-1.36054	C57Bl6	alb-SREBP-1c	Eukaryotic translation initiation factor 4 gamma 1;Isoform 2 of Eukaryotic translation initiation factor 4 gamma 1	Eif4g1	nucleus,cytoplasm,cytosol,polysome,eukaryotic translation initiation factor 4F complex;	mRNA binding,translation initiation factor activity,protein binding,ATP binding,translation factor activity, RNA binding,eukaryotic initiation factor 4E binding,identical protein binding,cadherin binding;	behavioral fear response,translation,translational initiation,regulation of translational initiation,mitochondrion organization,positive regulation of cell proliferation,negative regulation of autophagy,negative regulation of peptidyl-threonine phosphorylation,positive regulation of cell death,positive regulation of cell growth,cellular response to nutrient levels,positive regulation of cellular …
C57Bl6 / alb-SREBP-1c	Q9DCF9;Q9DCF9-2	SSRG_MOUSE	Q9DCF9;Q9DCF9-2	Q9DCF9;Q9DCF9-2	-0.442583	0.442583	0.0449234	7	3	-26.4184	0.735816	-1.35904	C57Bl6	alb-SREBP-1c	Translocon-associated protein subunit gamma;Isoform 2 of Translocon-associated protein subunit gamma	Ssr3	intracellular,endoplasmic reticulum membrane,integral component of membrane;	;	SRP-dependent cotranslational protein targeting to membrane;
C57Bl6 / alb-SREBP-1c	Q62167	DDX3X_MOUSE	Q62167	Q62167	-0.441867	0.441867	0.00235085	39	13	-26.3819	0.736181	-1.35836	C57Bl6	alb-SREBP-1c	ATP-dependent RNA helicase DDX3X	Ddx3x	nucleus,nucleolus,cytoplasm,mitochondrial outer membrane,cytosol,cytoplasmic stress granule,nuclear speck,cytoplasmic ribonucleoprotein granule,eukaryotic translation initiation factor 3 complex,cytosolic small ribosomal subunit	DNA binding,RNA binding,GTPase activity,ATP-dependent DNA helicase activity,ATP-dependent RNA helicase activity,protein binding,ATP binding,transcription factor binding,poly(A) binding,eukaryotic initiation factor 4E binding,ATPase activity,nucleoside-triphosphatase activity,translation initiation factor binding,RNA strand annealing activity,RNA stem-loop binding,ribosomal small subunit binding,C…	transcription, DNA-templated,translational initiation,chromosome segregation,extrinsic apoptotic signaling pathway via death domain receptors,response to virus,regulation of gene expression,RNA secondary structure unwinding,positive regulation of gene expression,Wnt signaling pathway,negative regulation of translation,positive regulation of cell growth,negative regulation of cell growth,negative …
C57Bl6 / alb-SREBP-1c	P28654	PGS2_MOUSE	P28654	P28654	-0.441525	0.441525	0.472687	5	2	-26.3644	0.736356	-1.35804	C57Bl6	alb-SREBP-1c	Decorin	Dcn	extracellular region,proteinaceous extracellular matrix,collagen type VI trimer,extracellular space,cytoplasm,extracellular matrix	protein kinase inhibitor activity,collagen binding,glycosaminoglycan binding,protein N-terminus binding,extracellular matrix binding	kidney development,placenta development,negative regulation of protein kinase activity,skeletal muscle tissue development,aging,response to mechanical stimulus,positive regulation of autophagy,negative regulation of endothelial cell migration,positive regulation of phosphatidylinositol 3-kinase signaling,positive regulation of macroautophagy,negative regulation of angiogenesis,cytokine-mediated s…
C57Bl6 / alb-SREBP-1c	B1AUE5	PEX10_MOUSE	B1AUE5	B1AUE5	-0.440076	0.440076	0.0390547	39	13	-26.2904	0.737096	-1.35668	C57Bl6	alb-SREBP-1c	Peroxisome biogenesis factor 10	Pex10	peroxisome,peroxisomal membrane,integral component of peroxisomal membrane	protein C-terminus binding,zinc ion binding	peroxisome organization,protein import into peroxisome matrix
C57Bl6 / alb-SREBP-1c	Q9EQF5	DPYS_MOUSE	Q9EQF5	Q9EQF5	-0.439851	0.439851	0.0125954	18	6	-26.2789	0.737211	-1.35646	C57Bl6	alb-SREBP-1c	Dihydropyrimidinase	Dpys	cytosol	uracil binding,thymine binding,dihydropyrimidinase activity,zinc ion binding,amino acid binding,phosphoprotein binding	pyrimidine nucleobase catabolic process,thymine catabolic process,uracil catabolic process,beta-alanine metabolic process,protein homooligomerization,protein homotetramerization
C57Bl6 / alb-SREBP-1c	Q922E4	PCY2_MOUSE	Q922E4	Q922E4	-0.438069	0.438069	0.0271285	17	6	-26.1878	0.738122	-1.35479	C57Bl6	alb-SREBP-1c	Ethanolamine-phosphate cytidylyltransferase	Pcyt2		ethanolamine-phosphate cytidylyltransferase activity	phosphatidylethanolamine biosynthetic process
C57Bl6 / alb-SREBP-1c	Q8JZN7	MIRO2_MOUSE	Q8JZN7	Q8JZN7	-0.437978	0.437978	1.86802e-05	41	14	-26.1831	0.738169	-1.3547	C57Bl6	alb-SREBP-1c	Mitochondrial Rho GTPase 2	Rhot2	mitochondrion,mitochondrial inner membrane,cytosol,integral component of mitochondrial outer membrane	GTPase activity,calcium ion binding,GTP binding	cellular homeostasis,mitochondrion transport along microtubule,mitochondrial outer membrane permeabilization
C57Bl6 / alb-SREBP-1c	P47941	CRKL_MOUSE	P47941	P47941	-0.437791	0.437791	0.530511	6	2	-26.1736	0.738264	-1.35453	C57Bl6	alb-SREBP-1c	Crk-like protein	Crkl	nucleoplasm,cytosol	phosphotyrosine binding,protein binding,identical protein binding,cadherin binding	blood vessel development,pattern specification process,heart development,positive regulation of cell proliferation,animal organ morphogenesis,anterior/posterior pattern specification,thymus development,parathyroid gland development,positive regulation of substrate adhesion-dependent cell spreading
C57Bl6 / alb-SREBP-1c	P51660	DHB4_MOUSE	P51660	P51660	-0.437317	0.437317	6.87485e-12	360	58	-26.1493	0.738507	-1.35408	C57Bl6	alb-SREBP-1c	Peroxisomal multifunctional enzyme type 2	Hsd17b4	mitochondrion,peroxisome	3-hydroxyacyl-CoA dehydrogenase activity,receptor binding,long-chain-enoyl-CoA hydratase activity,isomerase activity,3alpha,7alpha,12alpha-trihydroxy-5beta-cholest-24-enoyl-CoA hydratase activity,protein homodimerization activity,17-beta-hydroxysteroid dehydrogenase (NAD+) activity	very long-chain fatty acid metabolic process,fatty acid beta-oxidation,androgen metabolic process,estrogen metabolic process,very long-chain fatty-acyl-CoA metabolic process,medium-chain fatty-acyl-CoA metabolic process,Sertoli cell development
C57Bl6 / alb-SREBP-1c	O08553	DPYL2_MOUSE	O08553	O08553	-0.436663	0.436663	0.0129734	17	8	-26.1158	0.738842	-1.35347	C57Bl6	alb-SREBP-1c	Dihydropyrimidinase-related protein 2	Dpysl2	mitochondrion,cytosol,plasma membrane,axon,dendrite,growth cone,macromolecular complex,neuronal cell body,terminal bouton,myelin sheath,microtubule,membrane	protein binding,microtubule binding,hydrolase activity, acting on carbon-nitrogen (but not peptide) bonds,protein kinase binding,identical protein binding	response to amphetamine,endocytosis,cytoskeleton organization,axon guidance,regulation of neuron projection development,positive regulation of glutamate secretion,spinal cord development,olfactory bulb development,regulation of axon extension,response to cocaine,synaptic vesicle transport
C57Bl6 / alb-SREBP-1c	Q91XC9	PEX16_MOUSE	Q91XC9	Q91XC9	-0.435141	0.435141	1.3926e-08	77	20	-26.0379	0.739621	-1.35204	C57Bl6	alb-SREBP-1c	Peroxisomal membrane protein PEX16	Pex16	peroxisome,peroxisomal membrane,integral component of peroxisomal membrane,endoplasmic reticulum,endoplasmic reticulum membrane	protein C-terminus binding	protein targeting to peroxisome,peroxisome organization,peroxisome membrane biogenesis,protein import into peroxisome matrix,protein to membrane docking,ER-dependent peroxisome organization,protein import into peroxisome membrane,Requires Ontology
C57Bl6 / alb-SREBP-1c	Q9CQJ4	RING2_MOUSE	Q9CQJ4	Q9CQJ4	-0.434503	0.434503	0.493522	3	1	-26.0051	0.739949	-1.35145	C57Bl6	alb-SREBP-1c	E3 ubiquitin-protein ligase RING2	Rnf2	ubiquitin ligase complex,euchromatin,heterochromatin,sex chromatin,nucleus,nucleoplasm,nuclear body,PcG protein complex,PRC1 complex,MLL1 complex	chromatin binding,protein binding,zinc ion binding,ubiquitin protein ligase activity,RING-like zinc finger domain binding,ubiquitin-protein transferase activity	negative regulation of transcription from RNA polymerase II promoter,mitotic cell cycle,gastrulation with mouth forming second,transcription, DNA-templated,germ cell development,anterior/posterior axis specification,histone ubiquitination,histone H2A monoubiquitination,histone H2A-K119 monoubiquitination,negative regulation of sequence-specific DNA binding transcription factor activity
C57Bl6 / alb-SREBP-1c	Q9DAV9	TM38B_MOUSE	Q9DAV9	Q9DAV9	-0.433807	0.433807	0.0742338	11	5	-25.9694	0.740306	-1.35079	C57Bl6	alb-SREBP-1c	Trimeric intracellular cation channel type B	Tmem38b	endoplasmic reticulum membrane,integral component of membrane	calcium-activated potassium channel activity	potassium ion transmembrane transport
C57Bl6 / alb-SREBP-1c	O55242	SGMR1_MOUSE	O55242	O55242	-0.433744	0.433744	0.0197642	15	4	-25.9662	0.740338	-1.35073	C57Bl6	alb-SREBP-1c	Sigma non-opioid intracellular receptor 1	Sigmar1	nuclear envelope,nuclear inner membrane,nuclear outer membrane,endoplasmic reticulum,endoplasmic reticulum membrane,lipid particle,postsynaptic density,integral component of membrane,cell junction,growth cone,cytoplasmic vesicle,postsynaptic membrane	opioid receptor activity,protein binding,signaling receptor activity,identical protein binding	lipid transport,nervous system development,opioid receptor signaling pathway,regulation of neuron apoptotic process,protein homotrimerization
C57Bl6 / alb-SREBP-1c	Q9WTX5	SKP1_MOUSE	Q9WTX5	Q9WTX5	-0.433472	0.433472	0.4331	3	1	-25.9523	0.740477	-1.35048	C57Bl6	alb-SREBP-1c	S-phase kinase-associated protein 1	Skp1	nucleus,nucleoplasm,cytoplasm,centrosome,cytosol,SCF ubiquitin ligase complex,Cul7-RING ubiquitin ligase complex,PcG protein complex	ubiquitin-protein transferase activity,protein binding,beta-catenin binding,protein domain specific binding,cullin family protein binding,ubiquitin protein ligase activity	ubiquitin-dependent protein catabolic process,protein ubiquitination,SCF-dependent proteasomal ubiquitin-dependent protein catabolic process,histone H2A monoubiquitination,maintenance of protein location in nucleus
C57Bl6 / alb-SREBP-1c	P12815	PDCD6_MOUSE	P12815	P12815	-0.433239	0.433239	0.31766	15	5	-25.9403	0.740597	-1.35026	C57Bl6	alb-SREBP-1c	Programmed cell death protein 6	Pdcd6	Golgi membrane,nucleus,cytoplasm,endosome,endoplasmic reticulum,endoplasmic reticulum membrane,COPII vesicle coat,cytoplasmic vesicle,endoplasmic reticulum exit site,Cul3-RING ubiquitin ligase complex	magnesium ion binding,calcium-dependent cysteine-type endopeptidase activity,calcium ion binding,protein binding,identical protein binding,protein homodimerization activity,protein anchor,protein dimerization activity,calcium-dependent protein binding,binding, bridging	angiogenesis,positive regulation of endothelial cell proliferation,proteolysis,intracellular protein transport,ER to Golgi vesicle-mediated transport,apoptotic process,activation of cysteine-type endopeptidase activity involved in apoptotic process,positive regulation of endothelial cell migration,neural crest formation,neural crest cell development,negative regulation of vascular endothelial gro…
C57Bl6 / alb-SREBP-1c	Q9CZM2	RL15_MOUSE	Q9CZM2	Q9CZM2	-0.432623	0.432623	0.0128129	17	7	-25.9087	0.740913	-1.34969	C57Bl6	alb-SREBP-1c	60S ribosomal protein L15	Rpl15	nucleus,membrane,cytosolic large ribosomal subunit	RNA binding,structural constituent of ribosome,cadherin binding	cytoplasmic translation
C57Bl6 / alb-SREBP-1c	Q9JJW0	PXMP4_MOUSE	Q9JJW0	Q9JJW0	-0.432493	0.432493	0.00533606	37	8	-25.902	0.74098	-1.34956	C57Bl6	alb-SREBP-1c	Peroxisomal membrane protein 4	Pxmp4	peroxisome,peroxisomal membrane,integral component of membrane	molecular_function	biological_process
C57Bl6 / alb-SREBP-1c	Q8BVA5	LDAH_MOUSE	Q8BVA5	Q8BVA5	-0.431439	0.431439	0.153364	26	8	-25.8478	0.741522	-1.34858	C57Bl6	alb-SREBP-1c	Lipid droplet-associated hydrolase	Ldah	endoplasmic reticulum,lipid particle	lipase activity	lipid storage,foam cell differentiation
C57Bl6 / alb-SREBP-1c	P50172	DHI1_MOUSE	P50172	P50172	-0.431363	0.431363	0.00388494	151	23	-25.8439	0.741561	-1.34851	C57Bl6	alb-SREBP-1c	Corticosteroid 11-beta-dehydrogenase isozyme 1	Hsd11b1	endoplasmic reticulum membrane,integral component of membrane	11-beta-hydroxysteroid dehydrogenase [NAD(P)] activity,11-beta-hydroxysteroid dehydrogenase (NADP+) activity	steroid metabolic process,lung development,oxidation-reduction process
C57Bl6 / alb-SREBP-1c	Q9DCH4	EIF3F_MOUSE	Q9DCH4	Q9DCH4	-0.43074	0.43074	0.269634	6	2	-25.8119	0.741881	-1.34792	C57Bl6	alb-SREBP-1c	Eukaryotic translation initiation factor 3 subunit F	Eif3f	eukaryotic translation initiation factor 3 complex,eukaryotic translation initiation factor 3 complex, eIF3m	thiol-dependent ubiquitin-specific protease activity,protein binding,translation initiation factor binding,translation initiation factor activity	translational initiation,protein deubiquitination,IRES-dependent viral translational initiation
C57Bl6 / alb-SREBP-1c	P42867	GPT_MOUSE	P42867	P42867	-0.430723	0.430723	0.362538	3	1	-25.811	0.74189	-1.34791	C57Bl6	alb-SREBP-1c	UDP-N-acetylglucosamine--dolichyl-phosphate N-acetylglucosaminephosphotransferase	Dpagt1	endoplasmic reticulum membrane,membrane,integral component of membrane,intracellular membrane-bounded organelle	UDP-N-acetylglucosamine-dolichyl-phosphate N-acetylglucosaminephosphotransferase activity,UDP-N-acetylglucosamine-lysosomal-enzyme N-acetylglucosaminephosphotransferase activity,phospho-N-acetylmuramoyl-pentapeptide-transferase activity,transferase activity, transferring glycosyl groups	UDP-N-acetylglucosamine metabolic process,protein N-linked glycosylation,dolichol-linked oligosaccharide biosynthetic process,dolichyl diphosphate biosynthetic process,dolichol metabolic process
C57Bl6 / alb-SREBP-1c	P12790	CP2B9_MOUSE	P12790	P12790	-0.430488	0.430488	0.605267	15	21	-25.7989	0.742011	-1.34769	C57Bl6	alb-SREBP-1c	Cytochrome P450 2B9	Cyp2b9	endoplasmic reticulum membrane,organelle membrane	iron ion binding,arachidonic acid epoxygenase activity,steroid hydroxylase activity,heme binding,aromatase activity	epoxygenase P450 pathway,response to stilbenoid,oxidation-reduction process
C57Bl6 / alb-SREBP-1c	P48410	ABCD1_MOUSE	P48410	P48410	-0.429426	0.429426	0.235422	121	30	-25.7443	0.742557	-1.3467	C57Bl6	alb-SREBP-1c	ATP-binding cassette sub-family D member 1	Abcd1	cytoplasm,mitochondrion,peroxisome,peroxisomal membrane,integral component of peroxisomal membrane,perinuclear region of cytoplasm	long-chain fatty acid transporter activity,protein binding,ATP binding,ATPase activity,enzyme binding,ATPase activity, coupled to transmembrane movement of substances,identical protein binding,protein homodimerization activity	fatty acid beta-oxidation,peroxisome organization,peroxisomal long-chain fatty acid import,long-chain fatty acid catabolic process,very long-chain fatty acid catabolic process,transmembrane transport
C57Bl6 / alb-SREBP-1c	O70475	UGDH_MOUSE	O70475	O70475	-0.426905	0.426905	0.14222	43	19	-25.6144	0.743856	-1.34435	C57Bl6	alb-SREBP-1c	UDP-glucose 6-dehydrogenase	Ugdh	nucleus,nucleoplasm,cytosol	UDP-glucose 6-dehydrogenase activity,NAD binding	gastrulation with mouth forming second,glycosaminoglycan biosynthetic process,UDP-glucuronate biosynthetic process,oxidation-reduction process
C57Bl6 / alb-SREBP-1c	Q9R092	H17B6_MOUSE	Q9R092	Q9R092	-0.425527	0.425527	0.488389	18	6	-25.5433	0.744567	-1.34306	C57Bl6	alb-SREBP-1c	17-beta-hydroxysteroid dehydrogenase type 6	Hsd17b6	endoplasmic reticulum,early endosome membrane	estradiol 17-beta-dehydrogenase activity,retinol dehydrogenase activity,testosterone dehydrogenase (NAD+) activity	steroid metabolic process,oxidation-reduction process
C57Bl6 / alb-SREBP-1c	O88455	DHCR7_MOUSE	O88455	O88455	-0.425095	0.425095	0.000902815	19	6	-25.521	0.74479	-1.34266	C57Bl6	alb-SREBP-1c	7-dehydrocholesterol reductase	Dhcr7	nuclear outer membrane,endoplasmic reticulum,cytosol,integral component of endoplasmic reticulum membrane	sterol delta7 reductase activity,7-dehydrocholesterol reductase activity,NADP binding	blood vessel development,cholesterol biosynthetic process,post-embryonic development,sterol biosynthetic process,brassinosteroid biosynthetic process,cell differentiation,lung development,multicellular organism growth,regulation of cell proliferation,regulation of cholesterol biosynthetic process,oxidation-reduction process
C57Bl6 / alb-SREBP-1c	P61924	COPZ1_MOUSE	P61924	P61924	-0.424741	0.424741	0.500326	3	1	-25.5028	0.744972	-1.34233	C57Bl6	alb-SREBP-1c	Coatomer subunit zeta-1	Copz1	Golgi membrane,COPI vesicle coat	molecular_function	intracellular protein transport,intra-Golgi vesicle-mediated transport,toxin transport
C57Bl6 / alb-SREBP-1c	Q9R233;Q9R233-2	TPSN_MOUSE	Q9R233;Q9R233-2	Q9R233;Q9R233-2	-0.424653	0.424653	0.0733762	17	8	-25.4982	0.745018	-1.34225	C57Bl6	alb-SREBP-1c	Tapasin;Isoform Short of Tapasin	Tapbp	Golgi membrane,endoplasmic reticulum membrane,integral component of plasma membrane,phagocytic vesicle membrane,TAP complex;	protein binding,TAP1 binding,TAP2 binding;	antigen processing and presentation of exogenous peptide antigen via MHC class I, TAP-dependent,defense response,regulation of gene expression,antigen processing and presentation of endogenous peptide antigen via MHC class I,peptide antigen stabilization,regulation of protein complex stability;
C57Bl6 / alb-SREBP-1c	Q64435	UD16_MOUSE	Q64435	Q64435	-0.421946	0.421946	5.40185e-08	72	16	-25.3583	0.746417	-1.33973	C57Bl6	alb-SREBP-1c	UDP-glucuronosyltransferase 1-6	Ugt1a6	mitochondrial inner membrane,endoplasmic reticulum,endoplasmic reticulum membrane,integral component of membrane	glucuronosyltransferase activity,enzyme binding,protein homodimerization activity,protein heterodimerization activity	glucuronate metabolic process,flavonoid glucuronidation,xenobiotic glucuronidation
C57Bl6 / alb-SREBP-1c	Q8C165	P20D1_MOUSE	Q8C165	Q8C165	-0.421788	0.421788	0.00280345	74	20	-25.3501	0.746499	-1.33959	C57Bl6	alb-SREBP-1c	N-fatty-acyl-amino acid synthase/hydrolase PM20D1	Pm20d1	extracellular space	peptidase activity,hydrolase activity, acting on carbon-nitrogen (but not peptide) bonds, in linear amides,lyase activity,metal ion binding	proteolysis,cellular amino acid metabolic process,amide biosynthetic process,cellular amide catabolic process,cellular lipid metabolic process,energy homeostasis,negative regulation of neuron death,adaptive thermogenesis,regulation of oxidative phosphorylation uncoupler activity
C57Bl6 / alb-SREBP-1c	Q9R0H0	ACOX1_MOUSE	Q9R0H0	Q9R0H0	-0.420236	0.420236	4.67229e-05	467	74	-25.2698	0.747302	-1.33815	C57Bl6	alb-SREBP-1c	Peroxisomal acyl-coenzyme A oxidase 1	Acox1	nucleus,nucleoplasm,nucleolus,cytoplasm,mitochondrion,peroxisome,peroxisomal membrane,plasma membrane,intracellular membrane-bounded organelle	acyl-CoA dehydrogenase activity,acyl-CoA oxidase activity,receptor binding,palmitoyl-CoA oxidase activity,PDZ domain binding,protein N-terminus binding,flavin adenine dinucleotide binding,FAD binding	very long-chain fatty acid metabolic process,generation of precursor metabolites and energy,lipid metabolic process,fatty acid beta-oxidation,prostaglandin metabolic process,spermatogenesis,peroxisome fission,fatty acid oxidation,fatty acid beta-oxidation using acyl-CoA dehydrogenase,fatty acid beta-oxidation using acyl-CoA oxidase,cholesterol homeostasis,lipid homeostasis
C57Bl6 / alb-SREBP-1c	Q9QYJ0	DNJA2_MOUSE	Q9QYJ0	Q9QYJ0	-0.419334	0.419334	0.362504	14	5	-25.223	0.74777	-1.33731	C57Bl6	alb-SREBP-1c	DnaJ homolog subfamily A member 2	Dnaja2	cytosol,membrane	ATPase activator activity,ATP binding,heat shock protein binding,metal ion binding,unfolded protein binding,chaperone binding	response to heat,positive regulation of ATPase activity,protein refolding
C57Bl6 / alb-SREBP-1c	Q9CR88	RT14_MOUSE	Q9CR88	Q9CR88	-0.418605	0.418605	0.447438	3	3	-25.1852	0.748148	-1.33663	C57Bl6	alb-SREBP-1c	28S ribosomal protein S14, mitochondrial	Mrps14	mitochondrion,mitochondrial small ribosomal subunit	structural constituent of ribosome,protein binding	translation
C57Bl6 / alb-SREBP-1c	O35343	IMA3_MOUSE	O35343	O35343	-0.417689	0.417689	0.557579	3	1	-25.1377	0.748623	-1.33579	C57Bl6	alb-SREBP-1c	Importin subunit alpha-3	Kpna4	nucleus,nuclear pore,nucleoplasm,cytosol,nuclear membrane	protein binding,nuclear localization sequence binding,protein transporter activity,nuclear import signal receptor activity	protein import into nucleus,NLS-bearing protein import into nucleus,response to hydrogen peroxide
C57Bl6 / alb-SREBP-1c	Q3TNA1	XYLB_MOUSE	Q3TNA1	Q3TNA1	-0.415991	0.415991	0.0439031	11	6	-25.0496	0.749504	-1.33422	C57Bl6	alb-SREBP-1c	Xylulose kinase	Xylb	cytoplasm	xylulokinase activity,ATP binding	xylulose metabolic process,D-xylose metabolic process,carbohydrate phosphorylation
C57Bl6 / alb-SREBP-1c	Q8JZR0	ACSL5_MOUSE	Q8JZR0	Q8JZR0	-0.415164	0.415164	2.627e-12	162	34	-25.0066	0.749934	-1.33345	C57Bl6	alb-SREBP-1c	Long-chain-fatty-acid--CoA ligase 5	Acsl5	nucleus,nucleolus,mitochondrion,mitochondrial outer membrane,mitochondrial inner membrane,endoplasmic reticulum,endoplasmic reticulum membrane,integral component of membrane	long-chain fatty acid-CoA ligase activity,ATP binding,decanoate--CoA ligase activity	long-chain fatty acid metabolic process,regulation of extrinsic apoptotic signaling pathway
C57Bl6 / alb-SREBP-1c	Q99J39-2	DCMC_MOUSE	Q99J39-2	Q99J39-2	-0.414613	0.414613	0.00045334	129	29	-24.9779	0.750221	-1.33294	C57Bl6	alb-SREBP-1c	Isoform Cytoplasmic+peroxisomal of Malonyl-CoA decarboxylase, mitochondrial	Mlycd
C57Bl6 / alb-SREBP-1c	Q64464	CP3AD_MOUSE	Q64464	Q64464	-0.413231	0.413231	1.79069e-15	72	22	-24.9061	0.750939	-1.33167	C57Bl6	alb-SREBP-1c	Cytochrome P450 3A13	Cyp3a13	endoplasmic reticulum membrane,organelle membrane	monooxygenase activity,iron ion binding,steroid hydroxylase activity,heme binding,aromatase activity,estrogen 16-alpha-hydroxylase activity	lipid hydroxylation,steroid metabolic process,positive regulation of gene expression,oxidation-reduction process
C57Bl6 / alb-SREBP-1c	Q9CRB3	HIUH_MOUSE	Q9CRB3	Q9CRB3	-0.412895	0.412895	0.379208	40	9	-24.8886	0.751114	-1.33135	C57Bl6	alb-SREBP-1c	5-hydroxyisourate hydrolase	Urah	mitochondrion,peroxisome	hydrolase activity,hydroxyisourate hydrolase activity	purine nucleobase metabolic process,urate catabolic process
C57Bl6 / alb-SREBP-1c	Q8R123;Q8R123-2	FAD1_MOUSE	Q8R123;Q8R123-2	Q8R123;Q8R123-2	-0.412339	0.412339	0.0121872	47	18	-24.8596	0.751404	-1.33084	C57Bl6	alb-SREBP-1c	FAD synthase;Isoform 2 of FAD synthase	Flad1	cytoplasm,cytosol,plasma membrane;	FMN adenylyltransferase activity,ATP binding;	FAD biosynthetic process,oxidation-reduction process;
C57Bl6 / alb-SREBP-1c	Q8K1N1	PLPL8_MOUSE	Q8K1N1	Q8K1N1	-0.411745	0.411745	0.00145796	117	31	-24.8287	0.751713	-1.33029	C57Bl6	alb-SREBP-1c	Calcium-independent phospholipase A2-gamma	Pnpla8	Golgi membrane,intracellular,peroxisome,peroxisomal membrane,endoplasmic reticulum membrane,membrane,integral component of membrane,perinuclear region of cytoplasm	lysophospholipase activity,calcium-independent phospholipase A2 activity	prostaglandin biosynthetic process,fatty acid metabolic process,cell death,arachidonic acid metabolic process,phosphatidylcholine catabolic process,linoleic acid metabolic process,phosphatidylethanolamine catabolic process,arachidonic acid secretion
C57Bl6 / alb-SREBP-1c	Q62186	SSRD_MOUSE	Q62186	Q62186	-0.411482	0.411482	3.80827e-05	27	7	-24.8149	0.751851	-1.33005	C57Bl6	alb-SREBP-1c	Translocon-associated protein subunit delta	Ssr4	endoplasmic reticulum membrane,integral component of membrane	molecular_function	biological_process
C57Bl6 / alb-SREBP-1c	Q8VCH8	UBXN4_MOUSE	Q8VCH8	Q8VCH8	-0.411231	0.411231	0.304312	8	2	-24.8019	0.751981	-1.32982	C57Bl6	alb-SREBP-1c	UBX domain-containing protein 4	Ubxn4	nuclear envelope,endoplasmic reticulum,endoplasmic reticulum membrane,cytosol	molecular_function	response to unfolded protein,ER-associated ubiquitin-dependent protein catabolic process
C57Bl6 / alb-SREBP-1c	Q3UPL0;Q3UPL0-2	SC31A_MOUSE	Q3UPL0;Q3UPL0-2	Q3UPL0;Q3UPL0-2	-0.410287	0.410287	0.431816	5	6	-24.7526	0.752474	-1.32895	C57Bl6	alb-SREBP-1c	Protein transport protein Sec31A;Isoform 2 of Protein transport protein Sec31A	Sec31a	Golgi membrane,cytoplasm,endoplasmic reticulum,endoplasmic reticulum membrane,cytosol,vesicle coat,COPII vesicle coat,ER to Golgi transport vesicle,intracellular membrane-bounded organelle,perinuclear region of cytoplasm,endoplasmic reticulum exit site;	calcium-dependent protein binding;	protein transport,response to calcium ion,cargo loading into COPII-coated vesicle;
C57Bl6 / alb-SREBP-1c	O54749	CP2J5_MOUSE	O54749	O54749	-0.410061	0.410061	1.19575e-18	107	30	-24.7408	0.752592	-1.32874	C57Bl6	alb-SREBP-1c	Cytochrome P450 2J5	Cyp2j5	endoplasmic reticulum membrane,organelle membrane	iron ion binding,heme binding,aromatase activity	regulation of systemic arterial blood pressure by hormone,angiotensin mediated vasoconstriction involved in regulation of systemic arterial blood pressure,oxidation-reduction process,renal tubular secretion,positive regulation of estrogen secretion
C57Bl6 / alb-SREBP-1c	P58252	EF2_MOUSE	P58252	P58252	-0.409016	0.409016	0.000507128	100	31	-24.6863	0.753137	-1.32778	C57Bl6	alb-SREBP-1c	Elongation factor 2	Eef2	cytoplasm,cytosol,polysome,plasma membrane,aggresome,polysomal ribosome,membrane raft,nucleus	translation elongation factor activity,GTPase activity,protein binding,GTP binding,5S rRNA binding,protein kinase binding,ribosome binding,cadherin binding,actin filament binding	hematopoietic progenitor cell differentiation,response to ischemia,skeletal muscle contraction,translational elongation,aging,glial cell proliferation,response to estradiol,response to endoplasmic reticulum stress,skeletal muscle cell differentiation,response to hydrogen peroxide,response to ethanol,positive regulation of translation,response to folic acid,cellular response to brain-derived neuro…
C57Bl6 / alb-SREBP-1c	Q3UHC7;Q3UHC7-2;Q3UHC7-3;Q3UHC7-4	DAB2P_MOUSE	Q3UHC7;Q3UHC7-2;Q3UHC7-3;Q3UHC7-4	Q3UHC7;Q3UHC7-2;Q3UHC7-3;Q3UHC7-4	-0.408802	0.408802	0.500192	3	1	-24.6751	0.753249	-1.32758	C57Bl6	alb-SREBP-1c	Disabled homolog 2-interacting protein;Isoform 2 of Disabled homolog 2-interacting protein;Isoform 3 of Disabled homolog 2-interacting protein;Isoform 4 of Disabled homolog 2-interacting protein	Dab2ip	cytoplasm,plasma membrane,endocytic vesicle,axon,dendrite,intrinsic component of the cytoplasmic side of the plasma membrane,neuronal cell body membrane,neuronal cell body,cerebellar mossy fiber,climbing fiber,parallel fiber,AIP1-IRE1 complex;;;	GTPase activator activity,death receptor binding,protein binding,SH3 domain binding,kinase binding,protein kinase binding,mitogen-activated protein kinase kinase binding,mitogen-activated protein kinase kinase kinase binding,phosphatidylinositol-3-phosphate binding,signaling adaptor activity,phosphatidylinositol 3-kinase regulatory subunit binding,identical protein binding,protein homodimerizatio…	negative regulation of transcription from RNA polymerase II promoter,activation of MAPKKK activity,angiogenesis,negative regulation of protein phosphorylation,inflammatory response,response to unfolded protein,cell cycle,I-kappaB phosphorylation,activation of JUN kinase activity,negative regulation of cell proliferation,extrinsic apoptotic signaling pathway via death domain receptors,negative reg…
C57Bl6 / alb-SREBP-1c	P14847	CRP_MOUSE	P14847	P14847	-0.406669	0.406669	0.587738	2	1	-24.5637	0.754363	-1.32562	C57Bl6	alb-SREBP-1c	C-reactive protein	Crp	extracellular space	complement component C1q binding,calcium ion binding,low-density lipoprotein particle binding,identical protein binding,low-density lipoprotein particle receptor binding	acute-phase response,positive regulation of gene expression,negative regulation of macrophage derived foam cell differentiation,negative regulation of lipid storage,positive regulation of superoxide anion generation,Requires Ontology,regulation of interleukin-8 secretion
C57Bl6 / alb-SREBP-1c	Q91Y97	ALDOB_MOUSE	Q91Y97	Q91Y97	-0.406222	0.406222	0.000157832	85	23	-24.5403	0.754597	-1.32521	C57Bl6	alb-SREBP-1c	Fructose-bisphosphate aldolase B	Aldob	microtubule organizing center,centriolar satellite	fructose-bisphosphate aldolase activity,cytoskeletal protein binding,identical protein binding,ATPase binding,fructose-1-phosphate aldolase activity,fructose binding	fructose metabolic process,glycolytic process,NADH oxidation,fructose 1,6-bisphosphate metabolic process,positive regulation of ATPase activity,glycolytic process through fructose-6-phosphate,fructose catabolic process to hydroxyacetone phosphate and glyceraldehyde-3-phosphate,glycolytic process through fructose-1-phosphate,vacuolar proton-transporting V-type ATPase complex assembly
C57Bl6 / alb-SREBP-1c	Q91X72	HEMO_MOUSE	Q91X72	Q91X72	-0.405937	0.405937	0.11261	9	8	-24.5254	0.754746	-1.32495	C57Bl6	alb-SREBP-1c	Hemopexin	Hpx	extracellular space,cell	heme transporter activity,heme binding,metal ion binding	positive regulation of immunoglobulin production,positive regulation of humoral immune response mediated by circulating immunoglobulin,cellular iron ion homeostasis,heme transport,hemoglobin metabolic process,heme metabolic process,positive regulation of tyrosine phosphorylation of STAT protein,regulation of protein metabolic process,positive regulation of response to interferon-gamma,positive re…
C57Bl6 / alb-SREBP-1c	Q8BGI5	PEX26_MOUSE	Q8BGI5	Q8BGI5	-0.405621	0.405621	2.09184e-08	72	18	-24.5089	0.754911	-1.32466	C57Bl6	alb-SREBP-1c	Peroxisome assembly protein 26	Pex26	peroxisome,integral component of peroxisomal membrane	protein C-terminus binding,macromolecular complex binding,ATPase binding	protein import into peroxisome matrix,protein import into peroxisome membrane
C57Bl6 / alb-SREBP-1c	Q9DCN1	NUD12_MOUSE	Q9DCN1	Q9DCN1	-0.40536	0.40536	4.35918e-09	167	39	-24.4952	0.755048	-1.32442	C57Bl6	alb-SREBP-1c	Peroxisomal NADH pyrophosphatase NUDT12	Nudt12	nucleus,cytoplasm,peroxisome	NAD+ diphosphatase activity,NADH pyrophosphatase activity,metal ion binding	NADP catabolic process,NAD catabolic process
C57Bl6 / alb-SREBP-1c	Q8VCM5;Q8VCM5-3	MUL1_MOUSE	Q8VCM5;Q8VCM5-3	Q8VCM5;Q8VCM5-3	-0.405121	0.405121	0.333065	18	6	-24.4827	0.755173	-1.3242	C57Bl6	alb-SREBP-1c	Mitochondrial ubiquitin ligase activator of NFKB 1;Isoform 3 of Mitochondrial ubiquitin ligase activator of NFKB 1	Mul1	mitochondrion,peroxisome,axon,integral component of mitochondrial outer membrane,neuronal cell body;	ubiquitin-protein transferase activity,signal transducer activity,SUMO transferase activity,ubiquitin protein ligase binding,identical protein binding,metal ion binding;	mitochondrial fission,apoptotic process,activation of cysteine-type endopeptidase activity involved in apoptotic process,activation of JUN kinase activity,negative regulation of mitochondrial fusion,regulation of mitochondrion organization,protein ubiquitination,protein sumoylation,negative regulation of cell growth,regulation of protein stability,protein destabilization,positive regulation of pr…
C57Bl6 / alb-SREBP-1c	Q99L43	CDS2_MOUSE	Q99L43	Q99L43	-0.403169	0.403169	0.0643947	15	5	-24.3805	0.756195	-1.32241	C57Bl6	alb-SREBP-1c	Phosphatidate cytidylyltransferase 2	Cds2	mitochondrial inner membrane,endoplasmic reticulum,endoplasmic reticulum membrane,integral component of membrane	phosphatidate cytidylyltransferase activity	phosphatidylglycerol biosynthetic process,phototransduction,CDP-diacylglycerol biosynthetic process,glycosylation
C57Bl6 / alb-SREBP-1c	P17717	UDB17_MOUSE	P17717	P17717	-0.403137	0.403137	6.92853e-12	113	22	-24.3788	0.756212	-1.32238	C57Bl6	alb-SREBP-1c	UDP-glucuronosyltransferase 2B17	Ugt2b17	nuclear outer membrane,mitochondrial inner membrane,endoplasmic reticulum,endoplasmic reticulum membrane,integral component of membrane	glucuronosyltransferase activity	metabolic process
C57Bl6 / alb-SREBP-1c	Q01853	TERA_MOUSE	Q01853	Q01853	-0.402451	0.402451	0.119941	43	14	-24.3428	0.756572	-1.32175	C57Bl6	alb-SREBP-1c	Transitional endoplasmic reticulum ATPase	Vcp	proteasome complex,nucleus,nucleoplasm,cytoplasm,endoplasmic reticulum,endoplasmic reticulum membrane,lipid particle,cytosol,macromolecular complex,VCP-NPL4-UFD1 AAA ATPase complex,site of double-strand break,Derlin-1 retrotranslocation complex,myelin sheath,perinuclear region of cytoplasm,ATPase complex,VCP-NSFL1C complex	protein binding,ATP binding,lipid binding,ATPase activity,protein phosphatase binding,protein domain specific binding,polyubiquitin binding,ubiquitin protein ligase binding,deubiquitinase activator activity,K48-linked polyubiquitin binding,MHC class I protein binding,identical protein binding,ADP binding,ubiquitin-like protein ligase binding,BAT3 complex binding,ubiquitin-specific protease binding	double-strand break repair,ubiquitin-dependent protein catabolic process,NADH metabolic process,ER to Golgi vesicle-mediated transport,autophagy,activation of cysteine-type endopeptidase activity involved in apoptotic process,cellular response to DNA damage stimulus,proteasomal protein catabolic process,positive regulation of mitochondrial membrane potential,macroautophagy,protein ubiquitination,…
C57Bl6 / alb-SREBP-1c	O54962	BAF_MOUSE	O54962	O54962	-0.402302	0.402302	0.356677	3	2	-24.335	0.75665	-1.32162	C57Bl6	alb-SREBP-1c	Barrier-to-autointegration factor	Banf1	condensed chromosome,nucleus,nuclear envelope,nucleoplasm,cytoplasm,cytosol	DNA binding,protein C-terminus binding,enzyme binding,identical protein binding,protein homodimerization activity,protein N-terminus binding,LEM domain binding	DNA integration,negative regulation of viral genome replication,establishment of integrated proviral latency
C57Bl6 / alb-SREBP-1c	Q9DCX8	IYD1_MOUSE	Q9DCX8	Q9DCX8	-0.401367	0.401367	0.000126849	22	7	-24.2859	0.757141	-1.32076	C57Bl6	alb-SREBP-1c	Iodotyrosine deiodinase 1	Iyd	nucleoplasm,plasma membrane,integral component of plasma membrane,cytoplasmic vesicle membrane	iodide peroxidase activity,FMN binding,oxidoreductase activity	tyrosine metabolic process,thyroid hormone metabolic process,oxidation-reduction process,cellular oxidant detoxification
C57Bl6 / alb-SREBP-1c	Q9D710	TMX2_MOUSE	Q9D710	Q9D710	-0.400446	0.400446	0.0661987	12	5	-24.2376	0.757624	-1.31992	C57Bl6	alb-SREBP-1c	Thioredoxin-related transmembrane protein 2	Tmx2	cellular_component,cell,integral component of membrane	molecular_function	biological_process,cell redox homeostasis
C57Bl6 / alb-SREBP-1c	Q3KNM2	MARH5_MOUSE	Q3KNM2	Q3KNM2	-0.400289	0.400289	1.04626e-05	23	8	-24.2294	0.757706	-1.31977	C57Bl6	alb-SREBP-1c	E3 ubiquitin-protein ligase MARCH5	2019-03-05	mitochondrion,mitochondrial outer membrane,endoplasmic reticulum,endoplasmic reticulum membrane,integral component of membrane	ubiquitin-protein transferase activity,zinc ion binding,GTPase binding	protein polyubiquitination,protein autoubiquitination,protein localization to mitochondrion,regulation of mitochondrial fission,positive regulation of mitochondrial fission,negative regulation of cell aging
C57Bl6 / alb-SREBP-1c	O35326	SRSF5_MOUSE	O35326	O35326	-0.400105	0.400105	0.362624	2	2	-24.2197	0.757803	-1.3196	C57Bl6	alb-SREBP-1c	Serine/arginine-rich splicing factor 5	Srsf5	nuclear speck	RNA binding,protein binding,RS domain binding	transcription, DNA-templated,regulation of transcription, DNA-templated,mRNA processing,RNA splicing,response to wounding
C57Bl6 / alb-SREBP-1c	Q9CWG8;Q9CWG8-2	NDUF7_MOUSE	Q9CWG8;Q9CWG8-2	Q9CWG8;Q9CWG8-2	-0.399231	0.399231	0.424171	4	8	-24.1738	0.758262	-1.3188	C57Bl6	alb-SREBP-1c	Protein arginine methyltransferase NDUFAF7, mitochondrial;Isoform 2 of Protein arginine methyltransferase NDUFAF7, mitochondrial	Ndufaf7	mitochondrion;	enzyme binding,protein-arginine omega-N symmetric methyltransferase activity;	peptidyl-arginine methylation, to symmetrical-dimethyl arginine,mitochondrial respiratory chain complex I assembly,ATP metabolic process;
C57Bl6 / alb-SREBP-1c	Q8C1E7	T120A_MOUSE	Q8C1E7	Q8C1E7	-0.399056	0.399056	0.520228	2	1	-24.1646	0.758354	-1.31864	C57Bl6	alb-SREBP-1c	Transmembrane protein 120A	Tmem120a	nuclear inner membrane,membrane,integral component of membrane	molecular_function	fat cell differentiation,protein homooligomerization,protein heterooligomerization
C57Bl6 / alb-SREBP-1c	Q8CC88	VWA8_MOUSE	Q8CC88	Q8CC88	-0.398892	0.398892	1.01777e-23	590	134	-24.156	0.75844	-1.3185	C57Bl6	alb-SREBP-1c	von Willebrand factor A domain-containing protein 8	Vwa8	mitochondrion	ATP binding,ATPase activity	biological_process
C57Bl6 / alb-SREBP-1c	Q921T2;Q921T2-2;Q921T2-3	TOIP1_MOUSE	Q921T2;Q921T2-2;Q921T2-3	Q921T2;Q921T2-2;Q921T2-3	-0.397589	0.397589	0.343415	3	1	-24.0874	0.759126	-1.3173	C57Bl6	alb-SREBP-1c	Torsin-1A-interacting protein 1;Isoform 2 of Torsin-1A-interacting protein 1;Isoform 3 of Torsin-1A-interacting protein 1	Tor1aip1	nucleus,nuclear envelope,nuclear inner membrane,integral component of membrane,nuclear membrane;;	ATPase activator activity,protein binding,lamin binding,cytoskeletal protein binding,ATPase binding;;	positive regulation of ATPase activity,protein localization to nucleus,nuclear membrane organization;;
C57Bl6 / alb-SREBP-1c	P11589	MUP2_MOUSE	P11589	P11589	-0.395133	0.395133	0.267682	7	3	-23.9581	0.760419	-1.31506	C57Bl6	alb-SREBP-1c	Major urinary protein 2	Mup2	extracellular space,nucleus,cytosol	molecular_function,insulin-activated receptor activity,pheromone binding,small molecule binding	energy reserve metabolic process,biological_process,insulin receptor signaling pathway,aerobic respiration,positive regulation of gene expression,negative regulation of lipid storage,positive regulation of glucose metabolic process,heat generation,glucose homeostasis,locomotor rhythm,negative regulation of gluconeogenesis,positive regulation of lipid metabolic process,negative regulation of trans…
C57Bl6 / alb-SREBP-1c	P56395	CYB5_MOUSE	P56395	P56395	-0.393814	0.393814	0.307415	36	7	-23.8885	0.761115	-1.31386	C57Bl6	alb-SREBP-1c	Cytochrome b5	Cyb5a	mitochondrion,endoplasmic reticulum membrane,cytosol,membrane,integral component of membrane,organelle membrane,intracellular membrane-bounded organelle	stearoyl-CoA 9-desaturase activity,enzyme binding,heme binding,metal ion binding	fatty acid metabolic process,response to cadmium ion,oxidation-reduction process
C57Bl6 / alb-SREBP-1c	Q91V41	RAB14_MOUSE	Q91V41	Q91V41	-0.393364	0.393364	0.000801894	77	17	-23.8648	0.761352	-1.31345	C57Bl6	alb-SREBP-1c	Ras-related protein Rab-14	Rab14	Golgi membrane,intracellular,endosome,trans-Golgi network,cytosol,cytoplasmic vesicle membrane,early endosome membrane,intracellular membrane-bounded organelle,phagocytic vesicle,recycling endosome	GTPase activity,protein binding,GTP binding,GDP binding,myosin V binding	Golgi to endosome transport,fibroblast growth factor receptor signaling pathway,embryo development,protein transport,regulation of endocytosis,endocytic recycling,regulation of protein localization,defense response to bacterium,phagosome maturation
C57Bl6 / alb-SREBP-1c	Q64374	RGN_MOUSE	Q64374	Q64374	-0.39327	0.39327	0.496437	58	15	-23.8598	0.761402	-1.31337	C57Bl6	alb-SREBP-1c	Regucalcin	Rgn	extracellular region,nucleus,cytoplasm,cytosol	gluconolactonase activity,calcium ion binding,zinc ion binding,enzyme regulator activity	kidney development,negative regulation of protein kinase activity,cellular calcium ion homeostasis,spermatogenesis,aging,positive regulation of triglyceride biosynthetic process,positive regulation of glucose metabolic process,positive regulation of phosphatase activity,L-ascorbic acid biosynthetic process,negative regulation of phosphoprotein phosphatase activity,positive regulation of ATPase ac…
C57Bl6 / alb-SREBP-1c	Q9Z2G9	HTAI2_MOUSE	Q9Z2G9	Q9Z2G9	-0.392575	0.392575	0.392897	74	18	-23.8231	0.761769	-1.31273	C57Bl6	alb-SREBP-1c	Oxidoreductase HTATIP2	Htatip2	nuclear envelope,cytoplasm,cytosol	protein serine/threonine kinase activity,oxidoreductase activity, acting on the aldehyde or oxo group of donors, NAD or NADP as acceptor,NAD binding	angiogenesis,apoptotic process,cell differentiation,positive regulation of programmed cell death,regulation of angiogenesis,positive regulation of transcription from RNA polymerase II promoter,protein autophosphorylation,nuclear import,oxidation-reduction process
C57Bl6 / alb-SREBP-1c	P35283	RAB12_MOUSE	P35283	P35283	-0.392093	0.392093	0.160831	11	4	-23.7977	0.762023	-1.3123	C57Bl6	alb-SREBP-1c	Ras-related protein Rab-12	Rab12	Golgi membrane,lysosome,lysosomal membrane,autophagosome,Golgi apparatus,phagocytic vesicle,recycling endosome membrane	GTPase activity,GTP binding,GDP binding	autophagy,endosome to lysosome transport,protein transport,positive regulation of macroautophagy,cellular protein catabolic process,cellular response to interferon-gamma
C57Bl6 / alb-SREBP-1c	Q8VCH0	THIKB_MOUSE	Q8VCH0	Q8VCH0	-0.391861	0.391861	0.0227384	115	14	-23.7854	0.762146	-1.31208	C57Bl6	alb-SREBP-1c	3-ketoacyl-CoA thiolase B, peroxisomal	Acaa1b	mitochondrion,peroxisome	acetyl-CoA C-acyltransferase activity	fatty acid metabolic process
C57Bl6 / alb-SREBP-1c	Q80UG1	FADS6_MOUSE	Q80UG1	Q80UG1	-0.391199	0.391199	0.575934	5	2	-23.7504	0.762496	-1.31148	C57Bl6	alb-SREBP-1c	Fatty acid desaturase 6	Fads6	cellular_component,integral component of membrane	molecular_function,oxidoreductase activity	fatty acid biosynthetic process,biological_process,oxidation-reduction process
C57Bl6 / alb-SREBP-1c	Q8VBZ3	CLPT1_MOUSE	Q8VBZ3	Q8VBZ3	-0.390935	0.390935	0.0629328	19	6	-23.7365	0.762635	-1.31124	C57Bl6	alb-SREBP-1c	Cleft lip and palate transmembrane protein 1 homolog	Clptm1	integral component of plasma membrane,external side of plasma membrane	molecular_function	multicellular organism development,cell differentiation,regulation of T cell differentiation in thymus
C57Bl6 / alb-SREBP-1c	P62827	RAN_MOUSE	P62827	P62827	-0.390508	0.390508	0.124088	6	3	-23.7139	0.762861	-1.31086	C57Bl6	alb-SREBP-1c	GTP-binding nuclear protein Ran	Ran	nucleus,nuclear envelope,nucleoplasm,nucleolus,cytoplasm,centriole,cytosol,midbody,macromolecular complex,melanosome,RNA nuclear export complex,recycling endosome,chromatin	magnesium ion binding,GTPase activity,protein binding,GTP binding,GDP binding,cadherin binding,protein heterodimerization activity,pre-miRNA binding	ribosomal subunit export from nucleus,ribosomal large subunit export from nucleus,ribosomal small subunit export from nucleus,protein import into nucleus, translocation,mitotic sister chromatid segregation,protein import into nucleus,protein export from nucleus,actin cytoskeleton organization,positive regulation of protein binding,cellular protein localization,cellular protein complex localizatio…
C57Bl6 / alb-SREBP-1c	Q91WT9;Q91WT9-2	CBS_MOUSE	Q91WT9;Q91WT9-2	Q91WT9;Q91WT9-2	-0.390277	0.390277	0.512832	21	8	-23.7017	0.762983	-1.31065	C57Bl6	alb-SREBP-1c	Cystathionine beta-synthase;Isoform 2 of Cystathionine beta-synthase	Cbs	nucleus,cytoplasm;	cystathionine beta-synthase activity,oxygen binding,enzyme binding,heme binding,pyridoxal phosphate binding,ubiquitin protein ligase binding,identical protein binding,protein homodimerization activity,metal ion binding,nitrite reductase (NO-forming) activity,carbon monoxide binding,nitric oxide binding,modified amino acid binding,S-adenosyl-L-methionine binding;	endochondral ossification,blood vessel remodeling,cysteine biosynthetic process from serine,L-serine metabolic process,superoxide metabolic process,cysteine biosynthetic process via cystathionine,cysteine biosynthetic process,transsulfuration,cerebellum morphogenesis,regulation of cGMP metabolic process,negative regulation of apoptotic process,homocysteine catabolic process,regulation of JUN kina…
C57Bl6 / alb-SREBP-1c	Q8BFZ9	ERLN2_MOUSE	Q8BFZ9	Q8BFZ9	-0.389332	0.389332	0.106491	24	10	-23.6517	0.763483	-1.30979	C57Bl6	alb-SREBP-1c	Erlin-2	Erlin2	endoplasmic reticulum,endoplasmic reticulum membrane,cytosol,plasma membrane,integral component of membrane,macromolecular complex,membrane raft	protein binding,cholesterol binding,ubiquitin protein ligase binding	cholesterol metabolic process,ER-associated ubiquitin-dependent protein catabolic process,SREBP signaling pathway,negative regulation of cholesterol biosynthetic process,negative regulation of fatty acid biosynthetic process
C57Bl6 / alb-SREBP-1c	P80315	TCPD_MOUSE	P80315	P80315	-0.388709	0.388709	0.369138	30	10	-23.6187	0.763813	-1.30922	C57Bl6	alb-SREBP-1c	T-complex protein 1 subunit delta	Cct4	zona pellucida receptor complex,nucleoplasm,centrosome,cytosol,chaperonin-containing T-complex,microtubule,cilium,melanosome,cell body	protein binding,ATP binding,protein binding involved in protein folding,unfolded protein binding	'de novo' protein folding,binding of sperm to zona pellucida,positive regulation of telomere maintenance via telomerase,protein stabilization,positive regulation of telomerase activity,chaperone-mediated protein folding,scaRNA localization to Cajal body,toxin transport,positive regulation of establishment of protein localization to telomere,positive regulation of protein localization to Cajal bod…
C57Bl6 / alb-SREBP-1c	Q91V92	ACLY_MOUSE	Q91V92	Q91V92	-0.387641	0.387641	1.40294e-07	77	28	-23.5622	0.764378	-1.30825	C57Bl6	alb-SREBP-1c	ATP-citrate synthase	Acly	nucleoplasm,mitochondrion,cytosol,plasma membrane,citrate lyase complex	ATP citrate synthase activity,protein binding,ATP binding,metal ion binding,cofactor binding	acetyl-CoA biosynthetic process,citrate metabolic process,oxaloacetate metabolic process,fatty acid biosynthetic process,lipid biosynthetic process
C57Bl6 / alb-SREBP-1c	P80313	TCPH_MOUSE	P80313	P80313	-0.387447	0.387447	0.016827	24	10	-23.5519	0.764481	-1.30808	C57Bl6	alb-SREBP-1c	T-complex protein 1 subunit eta	Cct7	zona pellucida receptor complex,mitochondrion,chaperonin-containing T-complex,microtubule,cell body	protein binding,ATP binding,identical protein binding,protein binding involved in protein folding,unfolded protein binding	'de novo' protein folding,binding of sperm to zona pellucida,positive regulation of telomere maintenance via telomerase,protein stabilization,chaperone-mediated protein folding,toxin transport,positive regulation of establishment of protein localization to telomere,positive regulation of protein localization to Cajal body,positive regulation of telomerase RNA localization to Cajal body
C57Bl6 / alb-SREBP-1c	Q60991	CP7B1_MOUSE	Q60991	Q60991	-0.38689	0.38689	0.560325	39	22	-23.5223	0.764777	-1.30757	C57Bl6	alb-SREBP-1c	25-hydroxycholesterol 7-alpha-hydroxylase	Cyp7b1	endoplasmic reticulum membrane,organelle membrane,intracellular membrane-bounded organelle	iron ion binding,oxysterol 7-alpha-hydroxylase activity,heme binding	bile acid biosynthetic process,digestion,cholesterol metabolic process,negative regulation of intracellular estrogen receptor signaling pathway,B cell chemotaxis,positive regulation of epithelial cell proliferation,oxidation-reduction process,prostate gland epithelium morphogenesis
C57Bl6 / alb-SREBP-1c	Q9D1Q4	DPM3_MOUSE	Q9D1Q4	Q9D1Q4	-0.38641	0.38641	0.527403	2	1	-23.4969	0.765031	-1.30714	C57Bl6	alb-SREBP-1c	Dolichol-phosphate mannosyltransferase subunit 3	Dpm3	endoplasmic reticulum,endoplasmic reticulum membrane,integral component of endoplasmic reticulum membrane,dolichol-phosphate-mannose synthase complex	dolichyl-phosphate beta-D-mannosyltransferase activity	GPI anchor biosynthetic process,regulation of protein stability,protein O-linked mannosylation
C57Bl6 / alb-SREBP-1c	P48776	T23O_MOUSE	P48776	P48776	-0.386409	0.386409	0.114715	17	8	-23.4968	0.765032	-1.30714	C57Bl6	alb-SREBP-1c	Tryptophan 2,3-dioxygenase	Tdo2		tryptophan 2,3-dioxygenase activity,amino acid binding,oxygen binding,heme binding,identical protein binding,metal ion binding	tryptophan catabolic process to kynurenine,tryptophan catabolic process to acetyl-CoA,protein homotetramerization,oxidation-reduction process
C57Bl6 / alb-SREBP-1c	P46460	NSF_MOUSE	P46460	P46460	-0.385888	0.385888	0.255311	3	3	-23.4692	0.765308	-1.30666	C57Bl6	alb-SREBP-1c	Vesicle-fusing ATPase	Nsf	cytosol,plasma membrane,myelin sheath	SNARE binding,protein binding,ATP binding,ATPase activity,syntaxin-1 binding,protein kinase binding,syntaxin binding,PDZ domain binding,ionotropic glutamate receptor binding,ATPase activity, coupled,macromolecular complex binding,metal ion binding	positive regulation of receptor recycling,potassium ion transport,intracellular protein transport,SNARE complex disassembly,positive regulation of protein catabolic process
C57Bl6 / alb-SREBP-1c	O54734	OST48_MOUSE	O54734	O54734	-0.384808	0.384808	1.67754e-07	59	16	-23.4119	0.765881	-1.30569	C57Bl6	alb-SREBP-1c	Dolichyl-diphosphooligosaccharide--protein glycosyltransferase 48 kDa subunit	Ddost	endoplasmic reticulum,oligosaccharyltransferase complex,integral component of membrane,macromolecular complex,intracellular membrane-bounded organelle	oligosaccharyl transferase activity,dolichyl-diphosphooligosaccharide-protein glycotransferase activity	protein glycosylation,protein N-linked glycosylation,protein N-linked glycosylation via asparagine,response to cytokine,T cell activation
C57Bl6 / alb-SREBP-1c	Q9D826	SOX_MOUSE	Q9D826	Q9D826	-0.384373	0.384373	0.00629205	187	33	-23.3888	0.766112	-1.30529	C57Bl6	alb-SREBP-1c	Peroxisomal sarcosine oxidase	Pipox	peroxisome	receptor binding,sarcosine oxidase activity,L-pipecolate oxidase activity	L-lysine catabolic process to acetyl-CoA via L-pipecolate,tetrahydrofolate metabolic process,oxidation-reduction process
C57Bl6 / alb-SREBP-1c	P84084	ARF5_MOUSE	P84084	P84084	-0.384145	0.384145	0.0524207	6	2	-23.3767	0.766233	-1.30509	C57Bl6	alb-SREBP-1c	ADP-ribosylation factor 5	Arf5	cytoplasm,Golgi apparatus,plasma membrane,perinuclear region of cytoplasm	protein binding,GTP binding	retrograde vesicle-mediated transport, Golgi to ER,protein transport
C57Bl6 / alb-SREBP-1c	Q8CGF5;Q8CGF5-2	TMM56_MOUSE	Q8CGF5;Q8CGF5-2	Q8CGF5;Q8CGF5-2	-0.384081	0.384081	0.0105375	6	2	-23.3733	0.766267	-1.30503	C57Bl6	alb-SREBP-1c	Transmembrane protein 56;Isoform 2 of Transmembrane protein 56	Tmem56	cellular_component,integral component of membrane;	molecular_function;	biological_process;
C57Bl6 / alb-SREBP-1c	Q9QXD1	ACOX2_MOUSE	Q9QXD1	Q9QXD1	-0.383164	0.383164	9.60065e-05	306	61	-23.3246	0.766754	-1.3042	C57Bl6	alb-SREBP-1c	Peroxisomal acyl-coenzyme A oxidase 2	Acox2	peroxisome,cytosol,intracellular membrane-bounded organelle	acyl-CoA dehydrogenase activity,acyl-CoA oxidase activity,receptor binding,3alpha,7alpha,12alpha-trihydroxy-5beta-cholestanoyl-CoA 24-hydroxylase activity,protein homodimerization activity,flavin adenine dinucleotide binding,FAD binding	positive regulation of cell death,fatty acid beta-oxidation using acyl-CoA dehydrogenase,fatty acid beta-oxidation using acyl-CoA oxidase,positive regulation of response to oxidative stress
C57Bl6 / alb-SREBP-1c	P35505	FAAA_MOUSE	P35505	P35505	-0.382848	0.382848	0.00493393	61	16	-23.3078	0.766922	-1.30391	C57Bl6	alb-SREBP-1c	Fumarylacetoacetase	Fah		fumarylacetoacetase activity,metal ion binding	arginine catabolic process,L-phenylalanine catabolic process,tyrosine catabolic process
C57Bl6 / alb-SREBP-1c	Q9DBA6	TYSD1_MOUSE	Q9DBA6	Q9DBA6	-0.380529	0.380529	1.21744e-05	102	24	-23.1844	0.768156	-1.30182	C57Bl6	alb-SREBP-1c	Peroxisomal leader peptide-processing protease	Tysnd1	peroxisome	protease binding,serine-type endopeptidase activity,identical protein binding	proteolysis,protein processing,regulation of fatty acid beta-oxidation,protein homooligomerization
C57Bl6 / alb-SREBP-1c	P22599	A1AT2_MOUSE	P22599	P22599	-0.379679	0.379679	0.48301	12	4	-23.1392	0.768608	-1.30105	C57Bl6	alb-SREBP-1c	Alpha-1-antitrypsin 1-2	Serpina1b	extracellular region,extracellular space,endoplasmic reticulum,Golgi apparatus,intracellular membrane-bounded organelle	protease binding,serine-type endopeptidase inhibitor activity,protein binding,identical protein binding	in utero embryonic development,protein N-linked glycosylation,acute-phase response,negative regulation of endopeptidase activity,response to cytokine,response to peptide hormone
C57Bl6 / alb-SREBP-1c	P35290	RAB24_MOUSE	P35290	P35290	-0.378632	0.378632	0.00257995	21	7	-23.0833	0.769167	-1.30011	C57Bl6	alb-SREBP-1c	Ras-related protein Rab-24	Rab24	mitochondrion,autophagosome,cytosol,membrane	GTPase activity,protein binding,GTP binding	autophagy,protein transport
C57Bl6 / alb-SREBP-1c	Q8VC12	HUTU_MOUSE	Q8VC12	Q8VC12	-0.378108	0.378108	0.000911434	45	15	-23.0554	0.769446	-1.29964	C57Bl6	alb-SREBP-1c	Urocanate hydratase	Uroc1	cytosol	urocanate hydratase activity	histidine catabolic process,histidine catabolic process to glutamate and formamide,histidine catabolic process to glutamate and formate
C57Bl6 / alb-SREBP-1c	A3KMP2	TTC38_MOUSE	A3KMP2	A3KMP2	-0.377973	0.377973	0.541157	3	2	-23.0482	0.769518	-1.29951	C57Bl6	alb-SREBP-1c	Tetratricopeptide repeat protein 38	Ttc38		molecular_function	biological_process
C57Bl6 / alb-SREBP-1c	P63242	IF5A1_MOUSE	P63242	P63242	-0.376794	0.376794	0.0194033	9	4	-22.9853	0.770147	-1.29845	C57Bl6	alb-SREBP-1c	Eukaryotic translation initiation factor 5A-1	Eif5a	nucleus,annulate lamellae,nuclear pore,cytoplasm,endoplasmic reticulum membrane,dendrite,neuronal cell body	RNA binding,translation elongation factor activity,U6 snRNA binding,ribosome binding,protein N-terminus binding	mRNA export from nucleus,translational frameshifting,protein export from nucleus,apoptotic process,positive regulation of cytosolic calcium ion concentration,aging,positive regulation of cell proliferation,positive regulation of cardiac muscle cell apoptotic process,positive regulation of apoptotic process,negative regulation of apoptotic process,positive regulation of translational elongation,po…
C57Bl6 / alb-SREBP-1c	Q61598	GDIB_MOUSE	Q61598	Q61598	-0.376046	0.376046	0.535776	45	16	-22.9453	0.770547	-1.29778	C57Bl6	alb-SREBP-1c	Rab GDP dissociation inhibitor beta	Gdi2	Golgi apparatus,membrane,myelin sheath	Rab GDP-dissociation inhibitor activity,GTPase activator activity,protein binding,small GTPase binding	small GTPase mediated signal transduction,protein transport,vesicle-mediated transport,positive regulation of GTPase activity
C57Bl6 / alb-SREBP-1c	Q9ESB3	HRG_MOUSE	Q9ESB3	Q9ESB3	-0.374905	0.374905	0.00171933	14	6	-22.8844	0.771156	-1.29675	C57Bl6	alb-SREBP-1c	Histidine-rich glycoprotein	Hrg	vesicle,endolysosome,phagolysosome membrane,blood microparticle	serine-type endopeptidase inhibitor activity,cysteine-type endopeptidase inhibitor activity,receptor binding,protein binding,heparin binding,zinc ion binding,immunoglobulin binding,heme binding,heparan sulfate proteoglycan binding,metal ion binding	angiogenesis,positive regulation of immune response to tumor cell,chemotaxis,negative regulation of cell adhesion,negative regulation of cell proliferation,regulation of gene expression,regulation of platelet activation,negative regulation of lamellipodium assembly,negative regulation of endopeptidase activity,response to organic cyclic compound,heme transport,negative regulation of angiogenesis,…
C57Bl6 / alb-SREBP-1c	Q8BSY0	ASPH_MOUSE	Q8BSY0	Q8BSY0	-0.373877	0.373877	0.00476442	28	13	-22.8294	0.771706	-1.29583	C57Bl6	alb-SREBP-1c	Aspartyl/asparaginyl beta-hydroxylase	Asph	cytoplasm,endoplasmic reticulum,plasma membrane,integral component of membrane,integral component of endoplasmic reticulum membrane,cortical endoplasmic reticulum,sarcoplasmic reticulum membrane	peptide-aspartate beta-dioxygenase activity,calcium ion binding,protein binding	pattern specification process,negative regulation of cell proliferation,positive regulation of calcium ion transport into cytosol,regulation of inositol 1,4,5-trisphosphate-sensitive calcium-release channel activity,regulation of protein stability,activation of store-operated calcium channel activity,response to ATP,limb morphogenesis,peptidyl-aspartic acid hydroxylation,positive regulation of pr…
C57Bl6 / alb-SREBP-1c	Q6TEK5	VKORL_MOUSE	Q6TEK5	Q6TEK5	-0.373543	0.373543	0.203714	3	1	-22.8116	0.771884	-1.29553	C57Bl6	alb-SREBP-1c	Vitamin K epoxide reductase complex subunit 1-like protein 1	Vkorc1l1	endoplasmic reticulum,endoplasmic reticulum membrane,integral component of membrane	vitamin-K-epoxide reductase (warfarin-sensitive) activity,quinone binding	peptidyl-glutamic acid carboxylation,cellular response to oxidative stress,vitamin K metabolic process,oxidation-reduction process
C57Bl6 / alb-SREBP-1c	Q8BWP5	TTPA_MOUSE	Q8BWP5	Q8BWP5	-0.373178	0.373178	0.00222871	27	9	-22.792	0.77208	-1.2952	C57Bl6	alb-SREBP-1c	Alpha-tocopherol transfer protein	Ttpa	cytoplasm,late endosome,cytosol	phosphatidylinositol-4,5-bisphosphate binding,vitamin E binding,phosphatidylinositol-3,4-bisphosphate binding,Requires Ontology	placenta development,embryonic placenta development,response to nutrient,response to pH,response to toxic substance,vitamin E metabolic process,vitamin transport,intracellular pH reduction,negative regulation of cell death,negative regulation of establishment of blood-brain barrier,Requires Ontology
C57Bl6 / alb-SREBP-1c	Q9QXY9	PEX3_MOUSE	Q9QXY9	Q9QXY9	-0.373	0.373	4.58087e-11	107	20	-22.7825	0.772175	-1.29504	C57Bl6	alb-SREBP-1c	Peroxisomal biogenesis factor 3	Pex3	nucleoplasm,peroxisome,integral component of peroxisomal membrane,endoplasmic reticulum,cytosol,integral component of plasma membrane,macromolecular complex,protein-lipid complex	lipid binding,protein dimerization activity	peroxisome organization,peroxisome membrane biogenesis,protein import into peroxisome membrane
C57Bl6 / alb-SREBP-1c	Q61330	CNTN2_MOUSE	Q61330	Q61330	-0.372466	0.372466	0.292282	6	1	-22.7539	0.772461	-1.29456	C57Bl6	alb-SREBP-1c	Contactin-2	Cntn2	cell surface,axon,anchored component of membrane,node of Ranvier,neuron projection,neuronal cell body,myelin sheath,juxtaparanode region of axon,voltage-gated potassium channel complex	protein binding,carbohydrate binding,protein self-association	microtubule cytoskeleton organization,neuron migration,cell adhesion,axon guidance,axonal fasciculation,learning,adult walking behavior,regulation of cell morphogenesis involved in differentiation,positive regulation of protein processing,cerebral cortex GABAergic interneuron migration,central nervous system myelination,regulation of axon diameter,neuron projection development,receptor internaliz…
C57Bl6 / alb-SREBP-1c	P13542	MYH8_MOUSE	P13542	P13542	-0.37222	0.37222	0.234222	3	1	-22.7408	0.772592	-1.29434	C57Bl6	alb-SREBP-1c	Myosin-8	Myh8	cytoplasm,myosin complex,myofibril,myosin filament	microfilament motor activity,microtubule motor activity,protein binding,ATP binding,microtubule binding,ATPase activity,actin filament binding	skeletal muscle contraction,microtubule-based movement,muscle filament sliding,ATP metabolic process
C57Bl6 / alb-SREBP-1c	Q9DBM2	ECHP_MOUSE	Q9DBM2	Q9DBM2	-0.371658	0.371658	0.0738323	403	72	-22.7106	0.772894	-1.29384	C57Bl6	alb-SREBP-1c	Peroxisomal bifunctional enzyme	Ehhadh	mitochondrion,peroxisome,cytosol	3-hydroxyacyl-CoA dehydrogenase activity,dodecenoyl-CoA delta-isomerase activity,enoyl-CoA hydratase activity,receptor binding,enzyme binding	internal protein amino acid acetylation,fatty acid beta-oxidation,acyl-CoA metabolic process
C57Bl6 / alb-SREBP-1c	O55143	AT2A2_MOUSE	O55143	O55143	-0.371486	0.371486	3.42403e-07	131	37	-22.7014	0.772986	-1.29369	C57Bl6	alb-SREBP-1c	Sarcoplasmic/endoplasmic reticulum calcium ATPase 2	Atp2a2	nucleoplasm,endoplasmic reticulum,endoplasmic reticulum membrane,vesicle membrane,longitudinal sarcoplasmic reticulum,membrane,sarcoplasmic reticulum,extrinsic component of cytoplasmic side of plasma membrane,sarcoplasmic reticulum membrane,perinuclear region of cytoplasm,calcium ion-transporting ATPase complex,ribbon synapse,intercalated disc	calcium-transporting ATPase activity,calcium ion binding,protein binding,ATP binding,protein C-terminus binding,enzyme binding,S100 protein binding,calcium-transporting ATPase activity involved in regulation of cardiac muscle cell membrane potential	regulation of the force of heart contraction,cellular calcium ion homeostasis,regulation of muscle contraction,ER-nucleus signaling pathway,organelle organization,regulation of cardiac muscle contraction by calcium ion signaling,transition between fast and slow fiber,cardiac muscle hypertrophy in response to stress,endoplasmic reticulum calcium ion homeostasis,positive regulation of endoplasmic r…
C57Bl6 / alb-SREBP-1c	Q9QUI0	RHOA_MOUSE	Q9QUI0	Q9QUI0	-0.371438	0.371438	0.00259706	41	12	-22.6989	0.773011	-1.29364	C57Bl6	alb-SREBP-1c	Transforming protein RhoA	Rhoa	nucleus,mitochondrion,endosome,cytosol,cytoskeleton,plasma membrane,cell cortex,lamellipodium,axon,midbody,extrinsic component of cytoplasmic side of plasma membrane,vesicle,ruffle membrane,dendritic spine,apical junction complex,cell periphery,cleavage furrow	GTPase activity,protein binding,GTP binding,myosin binding,GDP binding	cell morphogenesis,response to hypoxia,angiotensin mediated vasoconstriction involved in regulation of systemic arterial blood pressure,alpha-beta T cell lineage commitment,regulation of systemic arterial blood pressure by endothelin,regulation of transcription from RNA polymerase II promoter,cytoskeleton organization,cell adhesion,cell-matrix adhesion,integrin-mediated signaling pathway,Rho prot…
C57Bl6 / alb-SREBP-1c	Q9DC16	ERGI1_MOUSE	Q9DC16	Q9DC16	-0.371415	0.371415	0.0333518	20	7	-22.6976	0.773024	-1.29362	C57Bl6	alb-SREBP-1c	Endoplasmic reticulum-Golgi intermediate compartment protein 1	Ergic1	Golgi membrane,nucleoplasm,endoplasmic reticulum membrane,endoplasmic reticulum-Golgi intermediate compartment,integral component of membrane,endoplasmic reticulum-Golgi intermediate compartment membrane,intracellular membrane-bounded organelle	molecular_function	ER to Golgi vesicle-mediated transport
C57Bl6 / alb-SREBP-1c	P55096	ABCD3_MOUSE	P55096	P55096	-0.371044	0.371044	3.84068e-16	365	63	-22.6777	0.773223	-1.29329	C57Bl6	alb-SREBP-1c	ATP-binding cassette sub-family D member 3	Abcd3	mitochondrion,mitochondrial inner membrane,peroxisome,peroxisomal membrane,peroxisomal matrix,integral component of membrane,intracellular membrane-bounded organelle	long-chain fatty acid transporter activity,protein binding,ATP binding,ATPase activity,ATPase activity, coupled to transmembrane movement of substances,protein homodimerization activity,protein self-association	fatty acid biosynthetic process,fatty acid beta-oxidation,peroxisome organization,response to organic cyclic compound,peroxisomal long-chain fatty acid import,response to drug,very long-chain fatty acid catabolic process,transmembrane transport
C57Bl6 / alb-SREBP-1c	Q64310	SURF4_MOUSE	Q64310	Q64310	-0.370345	0.370345	0.0058467	27	5	-22.6403	0.773597	-1.29266	C57Bl6	alb-SREBP-1c	Surfeit locus protein 4	Surf4	Golgi membrane,endoplasmic reticulum membrane,endoplasmic reticulum-Golgi intermediate compartment,integral component of membrane,endoplasmic reticulum-Golgi intermediate compartment membrane	protein binding	Golgi organization,positive regulation of organelle organization
C57Bl6 / alb-SREBP-1c	Q5F2F2	ABH15_MOUSE	Q5F2F2	Q5F2F2	-0.369883	0.369883	0.0536994	9	3	-22.6155	0.773845	-1.29225	C57Bl6	alb-SREBP-1c	Protein ABHD15	Abhd15	extracellular region	hydrolase activity, acting on ester bonds	cellular lipid metabolic process
C57Bl6 / alb-SREBP-1c	Q9CQJ1	HIG2A_MOUSE	Q9CQJ1	Q9CQJ1	-0.368176	0.368176	0.60166	4	2	-22.5238	0.774762	-1.29072	C57Bl6	alb-SREBP-1c	HIG1 domain family member 2A	Higd2a	mitochondrion,mitochondrial inner membrane,integral component of membrane	molecular_function	negative regulation of apoptotic process,oxidation-reduction process,mitochondrial respiratory chain supercomplex assembly
C57Bl6 / alb-SREBP-1c	P28230	CXB1_MOUSE	P28230	P28230	-0.367822	0.367822	0.580322	4	3	-22.5049	0.774951	-1.2904	C57Bl6	alb-SREBP-1c	Gap junction beta-1 protein	Gjb1	cytoplasm,endoplasmic reticulum,plasma membrane,gap junction,connexin complex,integral component of membrane,lateral plasma membrane	gap junction channel activity,protein homodimerization activity	cell communication,purine ribonucleotide transport,protein oligomerization,transmembrane transport,Requires Ontology
C57Bl6 / alb-SREBP-1c	P57776;P57776-2;P57776-3	EF1D_MOUSE	P57776;P57776-2;P57776-3	P57776;P57776-2;P57776-3	-0.366346	0.366346	0.367656	4	2	-22.4255	0.775745	-1.28908	C57Bl6	alb-SREBP-1c	Elongation factor 1-delta;Isoform 2 of Elongation factor 1-delta;Isoform 3 of Elongation factor 1-delta	Eef1d	fibrillar center,nucleus,cytoplasm,cytosol,eukaryotic translation elongation factor 1 complex,endoplasmic reticulum;;	DNA binding,translation elongation factor activity,heat shock protein binding,activating transcription factor binding,cadherin binding;;	regulation of transcription, DNA-templated,translational elongation,mRNA transcription,regulation of cell death,cellular response to ionizing radiation;;
C57Bl6 / alb-SREBP-1c	Q9CYH2	F213A_MOUSE	Q9CYH2	Q9CYH2	-0.366173	0.366173	0.01507	31	13	-22.4162	0.775838	-1.28893	C57Bl6	alb-SREBP-1c	Redox-regulatory protein FAM213A	Fam213a	extracellular region,cytoplasm,mitochondrion	antioxidant activity	regulation of osteoclast differentiation,oxidation-reduction process,cellular oxidant detoxification
C57Bl6 / alb-SREBP-1c	Q9JKW0	AR6P1_MOUSE	Q9JKW0	Q9JKW0	-0.365688	0.365688	0.196966	11	3	-22.3901	0.776099	-1.2885	C57Bl6	alb-SREBP-1c	ADP-ribosylation factor-like protein 6-interacting protein 1	Arl6ip1	cytoplasm,endoplasmic reticulum,Sec61 translocon complex,endoplasmic reticulum membrane,cytosol,integral component of membrane,integral component of endoplasmic reticulum membrane	protein binding,identical protein binding	positive regulation of L-glutamate transport,cotranslational protein targeting to membrane,apoptotic process,negative regulation of apoptotic process,negative regulation of cysteine-type endopeptidase activity involved in apoptotic process,endoplasmic reticulum tubular network assembly,endoplasmic reticulum tubular network membrane organization
C57Bl6 / alb-SREBP-1c	O55060	TPMT_MOUSE	O55060	O55060	-0.365201	0.365201	0.605881	4	2	-22.3639	0.776361	-1.28806	C57Bl6	alb-SREBP-1c	Thiopurine S-methyltransferase	Tpmt	cytoplasm	thiopurine S-methyltransferase activity	methylation
C57Bl6 / alb-SREBP-1c	P97457	MLRS_MOUSE	P97457	P97457	-0.364674	0.364674	0.358386	5	3	-22.3356	0.776644	-1.28759	C57Bl6	alb-SREBP-1c	Myosin regulatory light chain 2, skeletal muscle isoform	Mylpf	myosin complex	calcium ion binding,structural constituent of muscle	immune response,skeletal muscle tissue development
C57Bl6 / alb-SREBP-1c	P52840	ST1A1_MOUSE	P52840	P52840	-0.364329	0.364329	0.512826	33	10	-22.317	0.77683	-1.28728	C57Bl6	alb-SREBP-1c	Sulfotransferase 1A1	Sult1a1	cytoplasm	nucleotide binding,aryl sulfotransferase activity,sulfotransferase activity	steroid metabolic process,sulfation
C57Bl6 / alb-SREBP-1c	Q9CRC0	VKOR1_MOUSE	Q9CRC0	Q9CRC0	-0.364096	0.364096	0.284521	9	3	-22.3045	0.776955	-1.28708	C57Bl6	alb-SREBP-1c	Vitamin K epoxide reductase complex subunit 1	Vkorc1	endoplasmic reticulum,endoplasmic reticulum membrane,integral component of membrane	vitamin-K-epoxide reductase (warfarin-sensitive) activity,quinone binding	blood coagulation,drug metabolic process,peptidyl-glutamic acid carboxylation,vitamin K biosynthetic process,vitamin K metabolic process,positive regulation of coagulation,oxidation-reduction process,bone development
C57Bl6 / alb-SREBP-1c	O35386	PAHX_MOUSE	O35386	O35386	-0.363234	0.363234	0.000900595	163	24	-22.258	0.77742	-1.28631	C57Bl6	alb-SREBP-1c	Phytanoyl-CoA dioxygenase, peroxisomal	Phyh	mitochondrion,peroxisome	catalytic activity,protein binding,ferrous iron binding,carboxylic acid binding,L-ascorbic acid binding,cofactor binding,phytanoyl-CoA dioxygenase activity	fatty acid alpha-oxidation,2-oxoglutarate metabolic process,isoprenoid metabolic process,methyl-branched fatty acid metabolic process
C57Bl6 / alb-SREBP-1c	Q91ZH7	ABHD3_MOUSE	Q91ZH7	Q91ZH7	-0.362046	0.362046	0.0888486	13	6	-22.194	0.77806	-1.28525	C57Bl6	alb-SREBP-1c	Phospholipase ABHD3	Abhd3	cellular_component,integral component of membrane	phospholipase A2 activity,phosphatidylcholine 1-acylhydrolase activity,phosphatidylserine 1-acylhydrolase activity,1-acyl-2-lysophosphatidylserine acylhydrolase activity,Requires Ontology	phosphatidylcholine metabolic process
C57Bl6 / alb-SREBP-1c	Q9D0K1	PEX13_MOUSE	Q9D0K1	Q9D0K1	-0.361936	0.361936	0.000463832	55	15	-22.188	0.77812	-1.28515	C57Bl6	alb-SREBP-1c	Peroxisomal membrane protein PEX13	Pex13	peroxisome,peroxisomal membrane,integral component of peroxisomal membrane,intracellular membrane-bounded organelle	peroxisome targeting sequence binding	fatty acid alpha-oxidation,neuron migration,suckling behavior,locomotory behavior,protein import into peroxisome matrix, docking,cerebral cortex cell migration,microtubule-based peroxisome localization
C57Bl6 / alb-SREBP-1c	Q9R0Q9	MPU1_MOUSE	Q9R0Q9	Q9R0Q9	-0.361481	0.361481	0.001779	9	3	-22.1635	0.778365	-1.28474	C57Bl6	alb-SREBP-1c	Mannose-P-dolichol utilization defect 1 protein	Mpdu1	integral component of membrane	molecular_function	dolichol-linked oligosaccharide biosynthetic process,oligosaccharide biosynthetic process
C57Bl6 / alb-SREBP-1c	Q9R0H0-2	ACOX1_MOUSE	Q9R0H0-2	Q9R0H0-2	-0.361312	0.361312	0.0876612	42	2	-22.1543	0.778457	-1.28459	C57Bl6	alb-SREBP-1c	Isoform 2 of Peroxisomal acyl-coenzyme A oxidase 1	Acox1
C57Bl6 / alb-SREBP-1c	Q99PG0	AAAD_MOUSE	Q99PG0	Q99PG0	-0.360169	0.360169	1.55894e-08	77	20	-22.0927	0.779073	-1.28358	C57Bl6	alb-SREBP-1c	Arylacetamide deacetylase	Aadac	endoplasmic reticulum membrane,integral component of membrane,organelle membrane	triglyceride lipase activity,lipase activity,serine hydrolase activity,deacetylase activity	metabolic process,positive regulation of triglyceride catabolic process
C57Bl6 / alb-SREBP-1c	P47934	CACP_MOUSE	P47934	P47934	-0.359831	0.359831	0.0132202	119	28	-22.0744	0.779256	-1.28328	C57Bl6	alb-SREBP-1c	Carnitine O-acetyltransferase	Crat	mitochondrion,mitochondrial inner membrane,peroxisome,endoplasmic reticulum	carnitine O-acetyltransferase activity,receptor binding	fatty acid metabolic process,carnitine metabolic process, CoA-linked
C57Bl6 / alb-SREBP-1c	Q62452	UD19_MOUSE	Q62452	Q62452	-0.359822	0.359822	0.0576498	128	26	-22.0739	0.779261	-1.28327	C57Bl6	alb-SREBP-1c	UDP-glucuronosyltransferase 1-9	Ugt1a9	endoplasmic reticulum,endoplasmic reticulum membrane,integral component of membrane,intracellular membrane-bounded organelle	enzyme inhibitor activity,protein kinase C binding,steroid binding,fatty acid binding,drug binding,glucuronosyltransferase activity,enzyme binding,protein homodimerization activity,protein heterodimerization activity	negative regulation of catalytic activity,flavonoid glucuronidation,xenobiotic glucuronidation
C57Bl6 / alb-SREBP-1c	O70378	EMC8_MOUSE	O70378	O70378	-0.35967	0.35967	0.0733947	7	6	-22.0657	0.779343	-1.28313	C57Bl6	alb-SREBP-1c	ER membrane protein complex subunit 8	Emc8	cytoplasm,mitochondrion,cytosol,ER membrane protein complex	molecular_function	biological_process
C57Bl6 / alb-SREBP-1c	Q9D7P6	ISCU_MOUSE	Q9D7P6	Q9D7P6	-0.359415	0.359415	0.486657	2	4	-22.0519	0.779481	-1.28291	C57Bl6	alb-SREBP-1c	Iron-sulfur cluster assembly enzyme ISCU, mitochondrial	Iscu	cytoplasm,mitochondrion,mitochondrial matrix,cytosol	ferrous iron binding,protein complex scaffold,iron-sulfur transferase activity,2 iron, 2 sulfur cluster binding,4 iron, 4 sulfur cluster binding	cellular iron ion homeostasis,iron-sulfur cluster assembly,protein maturation by iron-sulfur cluster transfer
C57Bl6 / alb-SREBP-1c	Q8VBT2	SDHL_MOUSE	Q8VBT2	Q8VBT2	-0.359172	0.359172	0.0790162	17	6	-22.0388	0.779612	-1.28269	C57Bl6	alb-SREBP-1c	L-serine dehydratase/L-threonine deaminase	Sds	mitochondrion,cytosol	L-serine ammonia-lyase activity,L-threonine ammonia-lyase activity,pyridoxal phosphate binding,protein homodimerization activity	gluconeogenesis,L-serine catabolic process,pyruvate biosynthetic process
C57Bl6 / alb-SREBP-1c	P53994	RAB2A_MOUSE	P53994	P53994	-0.358769	0.358769	0.0333518	35	12	-22.017	0.77983	-1.28233	C57Bl6	alb-SREBP-1c	Ras-related protein Rab-2A	Rab2a	Golgi membrane,endoplasmic reticulum membrane,Golgi apparatus,endoplasmic reticulum-Golgi intermediate compartment membrane,melanosome	GTPase activity,GTP binding,GDP binding	intracellular protein transport,Golgi organization,vesicle-mediated transport
C57Bl6 / alb-SREBP-1c	O88456	CPNS1_MOUSE	O88456	O88456	-0.358663	0.358663	0.244301	4	2	-22.0113	0.779887	-1.28224	C57Bl6	alb-SREBP-1c	Calpain small subunit 1	Capns1	cytosol,plasma membrane,membrane	calcium-dependent cysteine-type endopeptidase activity,calcium ion binding,protein binding	proteolysis
C57Bl6 / alb-SREBP-1c	Q91W64	CP270_MOUSE	Q91W64	Q91W64	-0.358075	0.358075	0.00148585	120	32	-21.9795	0.780205	-1.28171	C57Bl6	alb-SREBP-1c	Cytochrome P450 2C70	Cyp2c70	endoplasmic reticulum membrane,organelle membrane	iron ion binding,arachidonic acid epoxygenase activity,steroid hydroxylase activity,heme binding,aromatase activity	epoxygenase P450 pathway,oxidation-reduction process
C57Bl6 / alb-SREBP-1c	Q9DB25	ALG5_MOUSE	Q9DB25	Q9DB25	-0.355622	0.355622	0.216918	6	3	-21.8467	0.781533	-1.27954	C57Bl6	alb-SREBP-1c	Dolichyl-phosphate beta-glucosyltransferase	Alg5	endoplasmic reticulum membrane,integral component of membrane	dolichyl-phosphate beta-glucosyltransferase activity,transferase activity	protein N-linked glycosylation,determination of left/right symmetry
C57Bl6 / alb-SREBP-1c	Q99P72-1	RTN4_MOUSE	Q99P72-1	Q99P72-1	-0.35464	0.35464	0.456706	13	4	-21.7935	0.782065	-1.27867	C57Bl6	alb-SREBP-1c	Isoform 3 of Reticulon-4	Rtn4
C57Bl6 / alb-SREBP-1c	Q3ULJ0;Q3ULJ0-2	GPD1L_MOUSE	Q3ULJ0;Q3ULJ0-2	Q3ULJ0;Q3ULJ0-2	-0.354226	0.354226	0.470429	54	14	-21.7711	0.782289	-1.2783	C57Bl6	alb-SREBP-1c	Glycerol-3-phosphate dehydrogenase 1-like protein;Isoform 2 of Glycerol-3-phosphate dehydrogenase 1-like protein	Gpd1l	plasma membrane,glycerol-3-phosphate dehydrogenase complex,membrane;	glycerol-3-phosphate dehydrogenase [NAD+] activity,sodium channel regulator activity,protein homodimerization activity,ion channel binding,NAD binding;	regulation of heart rate,carbohydrate metabolic process,NADH metabolic process,positive regulation of sodium ion transport,NAD metabolic process,negative regulation of peptidyl-serine phosphorylation,glycerol-3-phosphate catabolic process,oxidation-reduction process,regulation of ventricular cardiac muscle cell membrane depolarization,ventricular cardiac muscle cell action potential,negative regu…
C57Bl6 / alb-SREBP-1c	P39054;P39054-2	DYN2_MOUSE	P39054;P39054-2	P39054;P39054-2	-0.354202	0.354202	0.182518	7	5	-21.7698	0.782302	-1.27828	C57Bl6	alb-SREBP-1c	Dynamin-2;Isoform 2 of Dynamin-2	Dnm2	Golgi membrane,phagocytic cup,photoreceptor inner segment,nucleus,endosome,Golgi apparatus,trans-Golgi network,centrosome,cytosol,microtubule,clathrin-coated pit,postsynaptic density,lamellipodium,cell junction,midbody,phagocytic vesicle membrane,mitochondrial membrane,ruffle membrane,macromolecular complex,postsynaptic membrane,clathrin-coated endocytic vesicle,perinuclear region of cytoplasm,gr…	GTPase activity,protein binding,GTP binding,microtubule binding,SH3 domain binding,phosphatidylinositol 3-kinase regulatory subunit binding,macromolecular complex binding,nitric-oxide synthase binding;	mitochondrial fission,G-protein coupled receptor internalization,ventricular septum development,dynamin family protein polymerization involved in mitochondrial fission,Golgi to plasma membrane transport,receptor-mediated endocytosis,phagocytosis,spermatogenesis,response to light stimulus,positive regulation of lamellipodium assembly,negative regulation of transforming growth factor beta receptor …
C57Bl6 / alb-SREBP-1c	Q99KF1	TMED9_MOUSE	Q99KF1	Q99KF1	-0.353921	0.353921	0.00235417	13	4	-21.7546	0.782454	-1.27803	C57Bl6	alb-SREBP-1c	Transmembrane emp24 domain-containing protein 9	Tmed9	Golgi membrane,endoplasmic reticulum,endoplasmic reticulum membrane,endoplasmic reticulum-Golgi intermediate compartment,Golgi apparatus,integral component of membrane,endoplasmic reticulum-Golgi intermediate compartment membrane	syntaxin binding	Golgi organization,positive regulation of organelle organization,protein transport,COPI coating of Golgi vesicle
C57Bl6 / alb-SREBP-1c	P03893	NU2M_MOUSE	P03893	P03893	-0.353665	0.353665	0.182518	3	4	-21.7407	0.782593	-1.2778	C57Bl6	alb-SREBP-1c	NADH-ubiquinone oxidoreductase chain 2	Mtnd2	mitochondrion,mitochondrial respiratory chain complex I,integral component of membrane	NADH dehydrogenase (ubiquinone) activity	mitochondrial electron transport, NADH to ubiquinone,reactive oxygen species metabolic process
C57Bl6 / alb-SREBP-1c	Q8C7E7	STBD1_MOUSE	Q8C7E7	Q8C7E7	-0.353421	0.353421	0.0533209	21	7	-21.7274	0.782726	-1.27759	C57Bl6	alb-SREBP-1c	Starch-binding domain-containing protein 1	Stbd1	intracellular,endoplasmic reticulum,endoplasmic reticulum membrane,cytosol,integral component of plasma membrane,membrane,T-tubule,pre-autophagosomal structure membrane,perinuclear region of cytoplasm	enzyme binding,polysaccharide binding,glycogen binding,starch binding	glycogen catabolic process,intracellular transport,glycophagy
C57Bl6 / alb-SREBP-1c	P58059	RT21_MOUSE	P58059	P58059	-0.351905	0.351905	0.53404	5	3	-21.6451	0.783549	-1.27624	C57Bl6	alb-SREBP-1c	28S ribosomal protein S21, mitochondrial	Mrps21	mitochondrion,mitochondrial inner membrane,mitochondrial small ribosomal subunit,ribosomal subunit	structural constituent of ribosome	mitochondrial translation
C57Bl6 / alb-SREBP-1c	Q6ZQI3	MLEC_MOUSE	Q6ZQI3	Q6ZQI3	-0.351837	0.351837	0.000307398	43	13	-21.6414	0.783586	-1.27618	C57Bl6	alb-SREBP-1c	Malectin	Mlec	endoplasmic reticulum,endoplasmic reticulum membrane,integral component of membrane	enzyme binding,carbohydrate binding	carbohydrate metabolic process
C57Bl6 / alb-SREBP-1c	O35488	S27A2_MOUSE	O35488	O35488	-0.351043	0.351043	7.26002e-18	198	45	-21.5983	0.784017	-1.27548	C57Bl6	alb-SREBP-1c	Very long-chain acyl-CoA synthetase	Slc27a2	mitochondrion,peroxisome,peroxisomal membrane,integral component of peroxisomal membrane,endoplasmic reticulum,endoplasmic reticulum lumen,endoplasmic reticulum membrane,integral component of endoplasmic reticulum membrane	long-chain fatty acid-CoA ligase activity,receptor binding,ATP binding,fatty acid transporter activity,enzyme binding,very long-chain fatty acid-CoA ligase activity,phytanate-CoA ligase activity,pristanate-CoA ligase activity,decanoate--CoA ligase activity	very long-chain fatty acid metabolic process,fatty acid alpha-oxidation,long-chain fatty acid metabolic process,fatty acid beta-oxidation,bile acid biosynthetic process,fatty acid transport,very long-chain fatty acid catabolic process,long-chain fatty acid import,methyl-branched fatty acid metabolic process
C57Bl6 / alb-SREBP-1c	Q99KB8	GLO2_MOUSE	Q99KB8	Q99KB8	-0.350883	0.350883	0.592105	56	10	-21.5896	0.784104	-1.27534	C57Bl6	alb-SREBP-1c	Hydroxyacylglutathione hydrolase, mitochondrial	Hagh	cytoplasm,mitochondrion,mitochondrial matrix	hydroxyacylglutathione hydrolase activity,metal ion binding	glutathione biosynthetic process,methylglyoxal catabolic process to D-lactate via S-lactoyl-glutathione
C57Bl6 / alb-SREBP-1c	Q922Q1	MARC2_MOUSE	Q922Q1	Q922Q1	-0.350647	0.350647	1.85148e-08	111	23	-21.5768	0.784232	-1.27513	C57Bl6	alb-SREBP-1c	Mitochondrial amidoxime reducing component 2	2019-03-02	mitochondrion,mitochondrial outer membrane,mitochondrial inner membrane,peroxisome	nitrate reductase activity,molybdenum ion binding,pyridoxal phosphate binding,molybdopterin cofactor binding	nitrate metabolic process,oxidation-reduction process
C57Bl6 / alb-SREBP-1c	P06151	LDHA_MOUSE	P06151	P06151	-0.350485	0.350485	0.0274946	111	23	-21.568	0.78432	-1.27499	C57Bl6	alb-SREBP-1c	L-lactate dehydrogenase A chain	Ldha	mitochondrion,cytosol,sperm fibrous sheath	lactate dehydrogenase activity,L-lactate dehydrogenase activity,protein binding,cadherin binding	lactate biosynthetic process from pyruvate,glucose catabolic process to lactate via pyruvate,cellular response to extracellular stimulus
C57Bl6 / alb-SREBP-1c	Q61335	BAP31_MOUSE	Q61335	Q61335	-0.350113	0.350113	3.70729e-06	61	13	-21.5477	0.784523	-1.27466	C57Bl6	alb-SREBP-1c	B-cell receptor-associated protein 31	Bcap31	Golgi membrane,mitochondrion,endoplasmic reticulum,endoplasmic reticulum membrane,lipid particle,integral component of plasma membrane,clathrin-coated vesicle,Golgi cisterna membrane,endoplasmic reticulum-Golgi intermediate compartment membrane,perinuclear endoplasmic reticulum,Sec61 translocon complex	protein binding,MHC class I protein binding,macromolecular complex binding	intracellular protein transport,ER to Golgi vesicle-mediated transport,apoptotic process,positive regulation of cytosolic calcium ion concentration,spermatogenesis,negative regulation of endoplasmic reticulum calcium ion concentration,calcium-mediated signaling using intracellular calcium source,positive regulation of cysteine-type endopeptidase activity involved in apoptotic process,positive reg…
C57Bl6 / alb-SREBP-1c	Q7TMM9;Q9CWF2	TBB2A_MOUSE;TBB2B_MOUSE	Q7TMM9;Q9CWF2	Q7TMM9;Q9CWF2	-0.350066	0.350066	0.456954	9	3	-21.5452	0.784548	-1.27462	C57Bl6	alb-SREBP-1c	Tubulin beta-2A chain;Tubulin beta-2B chain	Tubb2a;Tubb2b	cytoplasm,microtubule;cytoplasm,microtubule,microtubule cytoskeleton	GTPase activity,structural constituent of cytoskeleton,GTP binding;GTPase activity,structural constituent of cytoskeleton,GTP binding,protein heterodimerization activity	cytoskeleton organization,microtubule-based process;neuron migration,cytoskeleton organization,microtubule-based process,positive regulation of axon guidance
C57Bl6 / alb-SREBP-1c	Q01339	APOH_MOUSE	Q01339	Q01339	-0.349607	0.349607	0.0766068	38	13	-21.5202	0.784798	-1.27421	C57Bl6	alb-SREBP-1c	Beta-2-glycoprotein 1	Apoh	extracellular region,extracellular space,cell surface,extracellular matrix,very-low-density lipoprotein particle,high-density lipoprotein particle,chylomicron	phospholipid binding,heparin binding,lipid binding,identical protein binding,lipoprotein lipase activator activity	negative regulation of endothelial cell proliferation,triglyceride metabolic process,blood coagulation, intrinsic pathway,negative regulation of endothelial cell migration,negative regulation of angiogenesis,regulation of blood coagulation,negative regulation of blood coagulation,plasminogen activation,negative regulation of myeloid cell apoptotic process,negative regulation of smooth muscle cell…
C57Bl6 / alb-SREBP-1c	Q9WUM3	COR1B_MOUSE	Q9WUM3	Q9WUM3	-0.349559	0.349559	0.310416	12	6	-21.5176	0.784824	-1.27417	C57Bl6	alb-SREBP-1c	Coronin-1B	Coro1b	stress fiber,cytoplasm,cytosol,actin filament,plasma membrane,actin cytoskeleton,lamellipodium,cell leading edge,perinuclear region of cytoplasm,cell periphery	protein binding,identical protein binding,cadherin binding,actin filament binding,Arp2/3 complex binding	cell migration,actin cytoskeleton organization,ruffle organization,negative regulation of Arp2/3 complex-mediated actin nucleation,endothelial cell chemotaxis,cellular response to platelet-derived growth factor stimulus,wound healing,actin filament bundle assembly,negative regulation of smooth muscle cell chemotaxis,actin filament branching,protein localization to cell leading edge,positive regul…
C57Bl6 / alb-SREBP-1c	Q8R5J9	PRAF3_MOUSE	Q8R5J9	Q8R5J9	-0.349245	0.349245	0.0339091	6	2	-21.5005	0.784995	-1.27389	C57Bl6	alb-SREBP-1c	PRA1 family protein 3	Arl6ip5	endoplasmic reticulum membrane,cytoskeleton,plasma membrane,integral component of membrane	protein binding	negative regulation of L-glutamate transport,intrinsic apoptotic signaling pathway in response to oxidative stress,negative regulation of mitochondrial membrane potential,L-glutamate transport,positive regulation of stress-activated MAPK cascade,positive regulation of apoptotic process,positive regulation of cysteine-type endopeptidase activity involved in apoptotic process
C57Bl6 / alb-SREBP-1c	P21981	TGM2_MOUSE	P21981	P21981	-0.348712	0.348712	0.0500739	9	7	-21.4715	0.785285	-1.27342	C57Bl6	alb-SREBP-1c	Protein-glutamine gamma-glutamyltransferase 2	Tgm2	proteinaceous extracellular matrix,cytoplasm,mitochondrion,endoplasmic reticulum,cytosol,membrane,intrinsic component of plasma membrane	protein-glutamine gamma-glutamyltransferase activity,calcium ion binding,GTP binding,transaminase activity	blood vessel remodeling,G-protein coupled receptor signaling pathway,phospholipase C-activating G-protein coupled receptor signaling pathway,peptide cross-linking,isopeptide cross-linking via N6-(L-isoglutamyl)-L-lysine,negative regulation of endoplasmic reticulum calcium ion concentration,positive regulation of apoptotic process,positive regulation of I-kappaB kinase/NF-kappaB signaling,apoptoti…
C57Bl6 / alb-SREBP-1c	O09174	AMACR_MOUSE	O09174	O09174	-0.348568	0.348568	0.532464	147	28	-21.4637	0.785363	-1.2733	C57Bl6	alb-SREBP-1c	Alpha-methylacyl-CoA racemase	Amacr	cytoplasm,mitochondrion,peroxisome,plasma membrane,intracellular membrane-bounded organelle	receptor binding,alpha-methylacyl-CoA racemase activity	fatty acid metabolic process,bile acid biosynthetic process,bile acid metabolic process,isoprenoid catabolic process
C57Bl6 / alb-SREBP-1c	A2RSY1;A2RSY1-2;A2RSY1-3	KANL3_MOUSE	A2RSY1;A2RSY1-2;A2RSY1-3	A2RSY1;A2RSY1-2;A2RSY1-3	-0.347728	0.347728	0.571721	3	1	-21.4179	0.785821	-1.27255	C57Bl6	alb-SREBP-1c	KAT8 regulatory NSL complex subunit 3;Isoform 2 of KAT8 regulatory NSL complex subunit 3;Isoform 3 of KAT8 regulatory NSL complex subunit 3	Kansl3	histone acetyltransferase complex,nucleus,nucleoplasm,nucleolus,intracellular membrane-bounded organelle;;	histone acetyltransferase activity (H4-K5 specific),histone acetyltransferase activity (H4-K8 specific),histone acetyltransferase activity (H4-K16 specific);;	histone H4-K5 acetylation,histone H4-K8 acetylation,histone H4-K16 acetylation;;
C57Bl6 / alb-SREBP-1c	Q91YI0	ARLY_MOUSE	Q91YI0	Q91YI0	-0.347691	0.347691	0.00412617	85	22	-21.4159	0.785841	-1.27252	C57Bl6	alb-SREBP-1c	Argininosuccinate lyase	Asl	cytoplasm	argininosuccinate lyase activity,identical protein binding	urea cycle,cellular amino acid metabolic process,locomotory behavior,post-embryonic development,ammonia assimilation cycle,arginine biosynthetic process via ornithine
C57Bl6 / alb-SREBP-1c	Q9DBN5	LONP2_MOUSE	Q9DBN5	Q9DBN5	-0.346815	0.346815	1.99593e-29	339	58	-21.3682	0.786318	-1.27175	C57Bl6	alb-SREBP-1c	Lon protease homolog 2, peroxisomal	Lonp2	nucleus,cytoplasm,peroxisome,peroxisomal matrix	protease binding,ATP-dependent peptidase activity,serine-type endopeptidase activity,receptor binding,protein binding,ATP binding,peptidase activity,enzyme binding	misfolded or incompletely synthesized protein catabolic process,protein targeting to peroxisome,response to organic cyclic compound,protein processing,regulation of fatty acid beta-oxidation
C57Bl6 / alb-SREBP-1c	P42925	PXMP2_MOUSE	P42925	P42925	-0.346604	0.346604	5.31154e-10	78	13	-21.3567	0.786433	-1.27156	C57Bl6	alb-SREBP-1c	Peroxisomal membrane protein 2	Pxmp2	cytoplasm,mitochondrion,peroxisomal membrane,integral component of peroxisomal membrane,macromolecular complex	channel activity	carboxylic acid transport,transmembrane transport
C57Bl6 / alb-SREBP-1c	Q9CQY5;Q9CQY5-2;Q9CQY5-3	MAGT1_MOUSE	Q9CQY5;Q9CQY5-2;Q9CQY5-3	Q9CQY5;Q9CQY5-2;Q9CQY5-3	-0.346473	0.346473	0.209896	16	6	-21.3495	0.786505	-1.27145	C57Bl6	alb-SREBP-1c	Magnesium transporter protein 1;Isoform 2 of Magnesium transporter protein 1;Isoform 3 of Magnesium transporter protein 1	Magt1	endoplasmic reticulum,plasma membrane,oligosaccharyltransferase complex,integral component of membrane;;	magnesium ion transmembrane transporter activity,dolichyl-diphosphooligosaccharide-protein glycotransferase activity;;	magnesium ion transport,protein N-linked glycosylation via asparagine,cognition,magnesium ion transmembrane transport;;
C57Bl6 / alb-SREBP-1c	Q9DCN2;Q9DCN2-2	NB5R3_MOUSE	Q9DCN2;Q9DCN2-2	Q9DCN2;Q9DCN2-2	-0.346101	0.346101	2.82147e-11	118	24	-21.3293	0.786707	-1.27112	C57Bl6	alb-SREBP-1c	NADH-cytochrome b5 reductase 3;Isoform 2 of NADH-cytochrome b5 reductase 3	Cyb5r3	mitochondrial outer membrane,mitochondrial inner membrane,endoplasmic reticulum membrane,lipid particle;	cytochrome-b5 reductase activity, acting on NAD(P)H,protein binding,AMP binding,oxidoreductase activity,ADP binding,flavin adenine dinucleotide binding,NAD binding;	cholesterol biosynthetic process,oxidation-reduction process;
C57Bl6 / alb-SREBP-1c	Q4LDG0	S27A5_MOUSE	Q4LDG0	Q4LDG0	-0.345606	0.345606	6.54212e-06	121	30	-21.3023	0.786977	-1.27068	C57Bl6	alb-SREBP-1c	Bile acyl-CoA synthetase	Slc27a5	endoplasmic reticulum,basal plasma membrane,integral component of endoplasmic reticulum membrane,macromolecular complex	long-chain fatty acid-CoA ligase activity,ATP binding,fatty acid transporter activity,very long-chain fatty acid-CoA ligase activity,macromolecular complex binding,cholate-CoA ligase activity	very long-chain fatty acid metabolic process,long-chain fatty acid metabolic process,triglyceride mobilization,bile acid biosynthetic process,bile acid metabolic process,fatty acid transport,plasma membrane long-chain fatty acid transport,ketone body biosynthetic process
C57Bl6 / alb-SREBP-1c	Q8VCR7	ABHEB_MOUSE	Q8VCR7	Q8VCR7	-0.345503	0.345503	0.307951	35	9	-21.2967	0.787033	-1.27059	C57Bl6	alb-SREBP-1c	Protein ABHD14B	Abhd14b	nucleus,nucleolus,cytoplasm,cytosol	hydrolase activity	positive regulation of transcription from RNA polymerase II promoter
C57Bl6 / alb-SREBP-1c	P07901	HS90A_MOUSE	P07901	P07901	-0.345456	0.345456	0.44285	16	10	-21.2941	0.787059	-1.27055	C57Bl6	alb-SREBP-1c	Heat shock protein HSP 90-alpha	Hsp90aa1	intracellular,nucleus,cytoplasm,cytosol,ruffle membrane,macromolecular complex,melanosome,neuronal cell body,myelin sheath,dendritic growth cone,axonal growth cone,perinuclear region of cytoplasm	protein tyrosine kinase activity,protein binding,ATP binding,ATPase activity,nitric-oxide synthase regulator activity,TPR domain binding,ubiquitin protein ligase binding,identical protein binding,protein homodimerization activity,histone deacetylase binding,tau protein binding,GTPase binding,unfolded protein binding,DNA polymerase binding,scaffold protein binding,disordered domain specific bindin…	nitric oxide biosynthetic process,response to unfolded protein,telomere maintenance via telomerase,response to heat,response to cold,peptidyl-tyrosine phosphorylation,central nervous system neuron axonogenesis,establishment of cell polarity,regulation of protein ubiquitination,positive regulation of protein polymerization,positive regulation of peptidyl-serine phosphorylation,protein refolding,pr…
C57Bl6 / alb-SREBP-1c	Q99J27	ACATN_MOUSE	Q99J27	Q99J27	-0.344455	0.344455	0.161233	6	3	-21.2395	0.787605	-1.26967	C57Bl6	alb-SREBP-1c	Acetyl-coenzyme A transporter 1	Slc33a1	endoplasmic reticulum membrane,integral component of plasma membrane	acetyl-CoA transporter activity,solute:proton symporter activity	acetyl-CoA transport,BMP signaling pathway,SMAD protein signal transduction,hydrogen ion transmembrane transport
C57Bl6 / alb-SREBP-1c	Q91YX5	LGAT1_MOUSE	Q91YX5	Q91YX5	-0.343784	0.343784	0.00771596	11	5	-21.2028	0.787972	-1.26908	C57Bl6	alb-SREBP-1c	Acyl-CoA:lysophosphatidylglycerol acyltransferase 1	Lpgat1	cellular_component,cytoplasm,endoplasmic reticulum membrane,integral component of membrane	molecular_function,transferase activity, transferring acyl groups	biological_process,phospholipid biosynthetic process,positive regulation of fatty acid biosynthetic process
C57Bl6 / alb-SREBP-1c	Q2TPA8	HSDL2_MOUSE	Q2TPA8	Q2TPA8	-0.343594	0.343594	0.000545923	198	35	-21.1924	0.788076	-1.26891	C57Bl6	alb-SREBP-1c	Hydroxysteroid dehydrogenase-like protein 2	Hsdl2	mitochondrion,peroxisome	molecular_function,oxidoreductase activity	biological_process,oxidation-reduction process
C57Bl6 / alb-SREBP-1c	P21550	ENOB_MOUSE	P21550	P21550	-0.343558	0.343558	0.496437	3	1	-21.1905	0.788095	-1.26888	C57Bl6	alb-SREBP-1c	Beta-enolase	Eno3	phosphopyruvate hydratase complex,cytosol,plasma membrane,membrane	magnesium ion binding,phosphopyruvate hydratase activity,protein homodimerization activity,protein heterodimerization activity	glycolytic process,aging,response to drug,skeletal muscle tissue regeneration
C57Bl6 / alb-SREBP-1c	P97328	KHK_MOUSE	P97328	P97328	-0.343406	0.343406	0.404049	12	5	-21.1822	0.788178	-1.26875	C57Bl6	alb-SREBP-1c	Ketohexokinase	Khk	nucleus,cytoplasm	ketohexokinase activity,ATP binding	fructose metabolic process,carbohydrate phosphorylation,fructose catabolic process to hydroxyacetone phosphate and glyceraldehyde-3-phosphate,glycolytic process through fructose-1-phosphate,regulation of glycogen metabolic process
C57Bl6 / alb-SREBP-1c	Q9ER41	TOR1B_MOUSE	Q9ER41	Q9ER41	-0.343144	0.343144	0.270642	9	3	-21.1679	0.788321	-1.26852	C57Bl6	alb-SREBP-1c	Torsin-1B	Tor1b	nuclear envelope,cytoplasm,endoplasmic reticulum,endoplasmic reticulum lumen,nuclear membrane	protein binding,ATP binding,ATPase activity	endoplasmic reticulum organization,chaperone mediated protein folding requiring cofactor,protein homooligomerization,nuclear membrane organization
C57Bl6 / alb-SREBP-1c	P37040	NCPR_MOUSE	P37040	P37040	-0.342888	0.342888	0.000194262	196	46	-21.1538	0.788462	-1.26829	C57Bl6	alb-SREBP-1c	NADPH--cytochrome P450 reductase	Por	mitochondrion,endoplasmic reticulum membrane,integral component of membrane,intracellular membrane-bounded organelle	NADPH-hemoprotein reductase activity,cytochrome-b5 reductase activity, acting on NAD(P)H,nitric oxide dioxygenase activity,electron carrier activity,FMN binding,oxidoreductase activity,hydrolase activity,enzyme binding,iron-cytochrome-c reductase activity,flavin adenine dinucleotide binding,NADP binding	regulation of growth plate cartilage chondrocyte proliferation,response to nutrient,carnitine metabolic process,flavonoid metabolic process,internal peptidyl-lysine acetylation,fatty acid oxidation,electron transport chain,positive regulation of chondrocyte differentiation,positive regulation of monooxygenase activity,response to drug,negative regulation of cysteine-type endopeptidase activity in…
C57Bl6 / alb-SREBP-1c	Q9CQC9	SAR1B_MOUSE	Q9CQC9	Q9CQC9	-0.342374	0.342374	0.000702478	19	8	-21.1258	0.788742	-1.26784	C57Bl6	alb-SREBP-1c	GTP-binding protein SAR1b	Sar1b	endoplasmic reticulum membrane,Golgi cisterna membrane	protein binding,GTP binding,metal ion binding	intracellular protein transport,vesicle-mediated transport
C57Bl6 / alb-SREBP-1c	Q8WUR0	CS012_MOUSE	Q8WUR0	Q8WUR0	-0.341892	0.341892	0.300236	15	4	-21.0994	0.789006	-1.26742	C57Bl6	alb-SREBP-1c	Protein C19orf12 homolog	NaN	mitochondrion,endoplasmic reticulum,cytosol,integral component of membrane,mitochondrial membrane	molecular_function	autophagy,apoptotic process,response to oxidative stress,mitochondrial calcium ion homeostasis
C57Bl6 / alb-SREBP-1c	Q99LR1	ABD12_MOUSE	Q99LR1	Q99LR1	-0.339847	0.339847	0.240015	16	8	-20.9875	0.790125	-1.26562	C57Bl6	alb-SREBP-1c	Monoacylglycerol lipase ABHD12	Abhd12	cytoplasm,mitochondrion,integral component of membrane,AMPA glutamate receptor complex,dendrite cytoplasm	lysophospholipase activity,palmitoyl-(protein) hydrolase activity,acylglycerol lipase activity	protein depalmitoylation,phosphatidylserine catabolic process,adult walking behavior,response to auditory stimulus,acylglycerol catabolic process,glycerophospholipid catabolic process,monoacylglycerol catabolic process
C57Bl6 / alb-SREBP-1c	Q99N93	RM16_MOUSE	Q99N93	Q99N93	-0.339598	0.339598	0.157502	2	5	-20.9739	0.790261	-1.2654	C57Bl6	alb-SREBP-1c	39S ribosomal protein L16, mitochondrial	Mrpl16	mitochondrion,mitochondrial large ribosomal subunit	structural constituent of ribosome,rRNA binding	translation,mitochondrial translation
C57Bl6 / alb-SREBP-1c	P01029	CO4B_MOUSE	P01029	P01029	-0.339	0.339	0.158957	49	25	-20.9411	0.790589	-1.26488	C57Bl6	alb-SREBP-1c	Complement C4-B	C4b	extracellular space,cell junction,axon,dendrite,neuronal cell body,other organism cell,synapse	complement binding,complement component C1q binding,endopeptidase inhibitor activity,carbohydrate binding	inflammatory response,complement activation,complement activation, classical pathway,negative regulation of endopeptidase activity,immunoglobulin mediated immune response,innate immune response
C57Bl6 / alb-SREBP-1c	Q9WU84	CCS_MOUSE	Q9WU84	Q9WU84	-0.338571	0.338571	0.532464	27	9	-20.9176	0.790824	-1.2645	C57Bl6	alb-SREBP-1c	Copper chaperone for superoxide dismutase	Ccs	nucleus,cytoplasm,mitochondrial intermembrane space,extracellular space	superoxide dismutase activity,copper ion binding,zinc ion binding,superoxide dismutase copper chaperone activity,cadherin binding	removal of superoxide radicals,metal ion transport,positive regulation of oxidoreductase activity,oxidation-reduction process
C57Bl6 / alb-SREBP-1c	P41216	ACSL1_MOUSE	P41216	P41216	-0.337977	0.337977	4.52927e-17	271	53	-20.885	0.79115	-1.26398	C57Bl6	alb-SREBP-1c	Long-chain-fatty-acid--CoA ligase 1	Acsl1	mitochondrion,mitochondrial outer membrane,peroxisomal membrane,endoplasmic reticulum membrane,plasma membrane,integral component of membrane	long-chain fatty acid-CoA ligase activity,ATP binding,decanoate--CoA ligase activity	long-chain fatty acid metabolic process,triglyceride metabolic process,response to nutrient,lipid biosynthetic process,response to organic cyclic compound,adiponectin-activated signaling pathway,response to oleic acid,xenobiotic catabolic process,response to drug,long-chain fatty acid import,positive regulation of protein serine/threonine kinase activity
C57Bl6 / alb-SREBP-1c	Q8C3X8	LMF2_MOUSE	Q8C3X8	Q8C3X8	-0.337256	0.337256	0.44285	2	2	-20.8454	0.791546	-1.26335	C57Bl6	alb-SREBP-1c	Lipase maturation factor 2	Lmf2	endoplasmic reticulum membrane,integral component of membrane	molecular_function	protein maturation
C57Bl6 / alb-SREBP-1c	Q6YGZ1	HPSE_MOUSE	Q6YGZ1	Q6YGZ1	-0.336019	0.336019	0.318859	2	1	-20.7776	0.792224	-1.26227	C57Bl6	alb-SREBP-1c	Heparanase	Hpse	proteinaceous extracellular matrix,nucleus,nucleoplasm,lysosome,lysosomal membrane,intracellular membrane-bounded organelle,membrane raft	heparanase activity,syndecan binding,protein dimerization activity	cell-matrix adhesion,positive regulation of vascular endothelial growth factor production,positive regulation of blood coagulation,heparan sulfate proteoglycan catabolic process,positive regulation of osteoblast proliferation,wound healing,regulation of hair follicle development,positive regulation of hair follicle development,positive regulation of protein kinase B signaling,angiogenesis involve…
C57Bl6 / alb-SREBP-1c	Q9WU78;Q9WU78-3	PDC6I_MOUSE	Q9WU78;Q9WU78-3	Q9WU78;Q9WU78-3	-0.335841	0.335841	0.606564	15	8	-20.7678	0.792322	-1.26211	C57Bl6	alb-SREBP-1c	Programmed cell death 6-interacting protein;Isoform 3 of Programmed cell death 6-interacting protein	Pdcd6ip	immunological synapse,microtubule organizing center,cytosol,bicellular tight junction,melanosome,actomyosin,myelin sheath,extracellular exosome,endoplasmic reticulum exit site,Flemming body;	protein binding,proteinase activated receptor binding,protein homodimerization activity,protein dimerization activity,calcium-dependent protein binding;	mitotic cytokinesis,actomyosin contractile ring assembly,cell separation after cytokinesis,apoptotic process,regulation of centrosome duplication,protein transport,viral budding via host ESCRT complex,maintenance of epithelial cell apical/basal polarity,viral budding,protein homooligomerization,bicellular tight junction assembly,regulation of membrane permeability,ubiquitin-independent protein ca…
C57Bl6 / alb-SREBP-1c	Q91X34	BAAT_MOUSE	Q91X34	Q91X34	-0.335754	0.335754	0.164193	189	28	-20.763	0.79237	-1.26204	C57Bl6	alb-SREBP-1c	Bile acid-CoA:amino acid N-acyltransferase	Baat	peroxisome,cytosol	receptor binding,palmitoyl-CoA hydrolase activity,N-acyltransferase activity,acyl-CoA hydrolase activity,glycine N-choloyltransferase activity,carboxylic ester hydrolase activity,medium-chain acyl-CoA hydrolase activity,long-chain acyl-CoA hydrolase activity,very long chain acyl-CoA hydrolase activity,Requires Ontology	liver development,bile acid conjugation,glycine metabolic process,fatty acid metabolic process,acyl-CoA metabolic process,bile acid biosynthetic process,bile acid metabolic process,taurine metabolic process,animal organ regeneration
C57Bl6 / alb-SREBP-1c	Q8VCM8	NCLN_MOUSE	Q8VCM8	Q8VCM8	-0.334982	0.334982	5.18132e-05	37	16	-20.7206	0.792794	-1.26136	C57Bl6	alb-SREBP-1c	Nicalin	Ncln	endoplasmic reticulum membrane,integral component of membrane,macromolecular complex	molecular_function	regulation of signal transduction,protein destabilization,regulation of protein complex assembly,protein stabilization,regulation of protein complex stability
C57Bl6 / alb-SREBP-1c	P49290	PERE_MOUSE	P49290	P49290	-0.3334	0.3334	0.60166	45	16	-20.6336	0.793664	-1.25998	C57Bl6	alb-SREBP-1c	Eosinophil peroxidase	Epx	extracellular space	peroxidase activity,heme binding,metal ion binding	defense response to nematode,response to oxidative stress,negative regulation of interleukin-10 production,negative regulation of interleukin-5 production,positive regulation of interleukin-4 production,hydrogen peroxide catabolic process,oxidation-reduction process,eosinophil migration,cellular oxidant detoxification
C57Bl6 / alb-SREBP-1c	Q9ERI6	RDH14_MOUSE	Q9ERI6	Q9ERI6	-0.333388	0.333388	0.144462	24	8	-20.633	0.79367	-1.25997	C57Bl6	alb-SREBP-1c	Retinol dehydrogenase 14	Rdh14	mitochondrion,endoplasmic reticulum	alcohol dehydrogenase (NADP+) activity	retinol metabolic process,oxidation-reduction process
C57Bl6 / alb-SREBP-1c	Q9D0L7	ARM10_MOUSE	Q9D0L7	Q9D0L7	-0.33137	0.33137	0.143624	25	9	-20.5219	0.794781	-1.25821	C57Bl6	alb-SREBP-1c	Armadillo repeat-containing protein 10	Armc10	mitochondrion,endoplasmic reticulum,endoplasmic reticulum membrane,integral component of membrane	p53 binding,DBD domain binding	positive regulation of growth rate,negative regulation of apoptotic process,negative regulation of intrinsic apoptotic signaling pathway by p53 class mediator
C57Bl6 / alb-SREBP-1c	P62880	GBB2_MOUSE	P62880	P62880	-0.331221	0.331221	0.343415	14	5	-20.5136	0.794864	-1.25808	C57Bl6	alb-SREBP-1c	Guanine nucleotide-binding protein G(I)/G(S)/G(T) subunit beta-2	Gnb2	heterotrimeric G-protein complex,myelin sheath,cell body,perinuclear region of cytoplasm	GTPase activity,signal transducer activity,calcium channel regulator activity,protein binding,macromolecular complex binding,GTPase binding	G-protein coupled receptor signaling pathway
C57Bl6 / alb-SREBP-1c	Q8R1G2	CMBL_MOUSE	Q8R1G2	Q8R1G2	-0.330587	0.330587	0.491264	57	16	-20.4787	0.795213	-1.25752	C57Bl6	alb-SREBP-1c	Carboxymethylenebutenolidase homolog	Cmbl	cytosol	molecular_function,hydrolase activity	biological_process
C57Bl6 / alb-SREBP-1c	Q8JZV9	BDH2_MOUSE	Q8JZV9	Q8JZV9	-0.330365	0.330365	0.0786073	24	7	-20.4665	0.795335	-1.25733	C57Bl6	alb-SREBP-1c	3-hydroxybutyrate dehydrogenase type 2	Bdh2	cytoplasm,cytosol	3-hydroxybutyrate dehydrogenase activity,oxidoreductase activity, acting on the CH-CH group of donors, NAD or NADP as acceptor,NAD binding	fatty acid beta-oxidation,siderophore biosynthetic process,epithelial cell differentiation,heme metabolic process,iron ion homeostasis
C57Bl6 / alb-SREBP-1c	Q9CR67	TMM33_MOUSE	Q9CR67	Q9CR67	-0.330235	0.330235	0.315564	8	4	-20.4593	0.795407	-1.25722	C57Bl6	alb-SREBP-1c	Transmembrane protein 33	Tmem33	nuclear envelope,nuclear pore,endoplasmic reticulum,endoplasmic reticulum membrane,integral component of endoplasmic reticulum membrane,melanosome	protein binding,structural constituent of nuclear pore	nucleocytoplasmic transport,cellular protein localization,response to endoplasmic reticulum stress,nuclear pore complex assembly,endoplasmic reticulum tubular network organization,regulation of endoplasmic reticulum tubular network organization,positive regulation of IRE1-mediated unfolded protein response,positive regulation of PERK-mediated unfolded protein response
C57Bl6 / alb-SREBP-1c	Q00897	A1AT4_MOUSE	Q00897	Q00897	-0.329769	0.329769	0.0218788	71	16	-20.4336	0.795664	-1.25681	C57Bl6	alb-SREBP-1c	Alpha-1-antitrypsin 1-4	Serpina1d	extracellular region,extracellular space,endoplasmic reticulum,Golgi apparatus,intracellular membrane-bounded organelle	protease binding,serine-type endopeptidase inhibitor activity,identical protein binding	negative regulation of endopeptidase activity,response to cytokine,response to peptide hormone
C57Bl6 / alb-SREBP-1c	P24472	GSTA4_MOUSE	P24472	P24472	-0.329449	0.329449	0.446075	6	4	-20.416	0.79584	-1.25653	C57Bl6	alb-SREBP-1c	Glutathione S-transferase A4	Gsta4	mitochondrion	glutathione transferase activity,drug binding,glutathione binding	glutathione metabolic process,xenobiotic metabolic process,response to herbicide,response to zinc ion,response to nicotine,cellular response to lithium ion
C57Bl6 / alb-SREBP-1c	Q9D1M0	SEC13_MOUSE	Q9D1M0	Q9D1M0	-0.329381	0.329381	0.40638	4	2	-20.4122	0.795878	-1.25647	C57Bl6	alb-SREBP-1c	Protein SEC13 homolog	Sec13	Golgi membrane,nuclear envelope,nucleoplasm,lysosomal membrane,endoplasmic reticulum,endoplasmic reticulum membrane,COPII vesicle coat,nuclear pore outer ring,intracellular membrane-bounded organelle,GATOR2 complex,kinetochore	structural molecule activity,identical protein binding	ER to Golgi vesicle-mediated transport,protein transport,positive regulation of TOR signaling,mRNA transport,cargo loading into COPII-coated vesicle,positive regulation of TORC1 signaling
C57Bl6 / alb-SREBP-1c	Q9D110	MTHFS_MOUSE	Q9D110	Q9D110	-0.328692	0.328692	0.541096	8	9	-20.3742	0.796258	-1.25587	C57Bl6	alb-SREBP-1c	5-formyltetrahydrofolate cyclo-ligase	Mthfs	cytoplasm,mitochondrion,mitochondrial matrix,cytosol	ATP binding,folic acid binding,5-formyltetrahydrofolate cyclo-ligase activity,metal ion binding	folic acid-containing compound biosynthetic process,tetrahydrofolate interconversion,tetrahydrofolate metabolic process
C57Bl6 / alb-SREBP-1c	P30115	GSTA3_MOUSE	P30115	P30115	-0.328641	0.328641	0.0410842	53	13	-20.3714	0.796286	-1.25583	C57Bl6	alb-SREBP-1c	Glutathione S-transferase A3	Gsta3	cytosol	glutathione transferase activity	ureteric bud development,glutathione metabolic process,aflatoxin catabolic process
C57Bl6 / alb-SREBP-1c	Q8K370	ACD10_MOUSE	Q8K370	Q8K370	-0.328017	0.328017	5.74814e-05	102	53	-20.337	0.79663	-1.25529	C57Bl6	alb-SREBP-1c	Acyl-CoA dehydrogenase family member 10	Acad10	mitochondrion	acyl-CoA dehydrogenase activity,hydrolase activity,flavin adenine dinucleotide binding	fatty acid beta-oxidation using acyl-CoA dehydrogenase
C57Bl6 / alb-SREBP-1c	P27046	MA2A1_MOUSE	P27046	P27046	-0.327679	0.327679	0.363482	15	20	-20.3182	0.796818	-1.25499	C57Bl6	alb-SREBP-1c	Alpha-mannosidase 2	Man2a1	Golgi membrane,extracellular space,Golgi apparatus,Golgi medial cisterna,cis-Golgi network,integral component of membrane	alpha-mannosidase activity,mannosyl-oligosaccharide 1,3-1,6-alpha-mannosidase activity,mannosidase activity,hydrolase activity,hydrolase activity, hydrolyzing N-glycosyl compounds,carbohydrate binding,metal ion binding	in utero embryonic development,liver development,mannose metabolic process,protein glycosylation,N-glycan processing,protein deglycosylation,mitochondrion organization,vacuole organization,respiratory gaseous exchange,lung alveolus development,positive regulation of neurogenesis,retina morphogenesis in camera-type eye
C57Bl6 / alb-SREBP-1c	Q9D7N9	APMAP_MOUSE	Q9D7N9	Q9D7N9	-0.327467	0.327467	0.0125954	31	11	-20.3066	0.796934	-1.25481	C57Bl6	alb-SREBP-1c	Adipocyte plasma membrane-associated protein	Apmap	endoplasmic reticulum,cell surface,membrane,integral component of membrane	arylesterase activity,hydrolase activity, acting on ester bonds,strictosidine synthase activity	biosynthetic process
C57Bl6 / alb-SREBP-1c	P06909	CFAH_MOUSE	P06909	P06909	-0.327396	0.327396	0.189638	8	4	-20.3026	0.796974	-1.25475	C57Bl6	alb-SREBP-1c	Complement factor H	Cfh	extracellular space	complement component C3b binding,protein binding,heparin binding,heparan sulfate proteoglycan binding	complement activation,complement activation, alternative pathway,regulation of complement activation,positive regulation of cytolysis
C57Bl6 / alb-SREBP-1c	Q91XE8	TM205_MOUSE	Q91XE8	Q91XE8	-0.325841	0.325841	0.00117823	12	4	-20.2167	0.797833	-1.2534	C57Bl6	alb-SREBP-1c	Transmembrane protein 205	Tmem205	integral component of membrane	molecular_function	biological_process
C57Bl6 / alb-SREBP-1c	Q9CR16	PPID_MOUSE	Q9CR16	Q9CR16	-0.325125	0.325125	0.457214	2	2	-20.1771	0.798229	-1.25277	C57Bl6	alb-SREBP-1c	Peptidyl-prolyl cis-trans isomerase D	Ppid	nucleus,nucleoplasm,nucleolus,cytoplasm,cytosol	peptidyl-prolyl cis-trans isomerase activity,FK506 binding,transcription factor binding,estrogen receptor binding,Hsp70 protein binding,heat shock protein binding,Hsp90 protein binding	negative regulation of transcription from RNA polymerase II promoter,protein peptidyl-prolyl isomerization,protein folding,apoptotic process,protein transport,lipid particle organization,regulation of apoptotic process,positive regulation of apoptotic process,positive regulation of viral genome replication,positive regulation of protein secretion,chaperone-mediated protein folding,macromolecular …
C57Bl6 / alb-SREBP-1c	P84099	RL19_MOUSE	P84099	P84099	-0.325122	0.325122	0.442377	9	6	-20.1769	0.798231	-1.25277	C57Bl6	alb-SREBP-1c	60S ribosomal protein L19	Rpl19	cytosolic large ribosomal subunit,polysomal ribosome	RNA binding,structural constituent of ribosome,large ribosomal subunit rRNA binding,5.8S rRNA binding	cytoplasmic translation,translation,liver regeneration
C57Bl6 / alb-SREBP-1c	P35564	CALX_MOUSE	P35564	P35564	-0.324914	0.324914	4.06683e-10	163	36	-20.1654	0.798346	-1.25259	C57Bl6	alb-SREBP-1c	Calnexin	Canx	endoplasmic reticulum,endoplasmic reticulum membrane,smooth endoplasmic reticulum,rough endoplasmic reticulum,ribosome,membrane,integral component of membrane,axon,dendrite cytoplasm,melanosome,neuronal cell body,dendritic spine,myelin sheath,ER-mitochondrion membrane contact site,endoplasmic reticulum quality control compartment,integral component of lumenal side of endoplasmic reticulum membrane	calcium ion binding,protein binding,carbohydrate binding,apolipoprotein binding,ionotropic glutamate receptor binding,unfolded protein binding	aging,synaptic vesicle endocytosis,chaperone-mediated protein folding,clathrin-dependent endocytosis
C57Bl6 / alb-SREBP-1c	P10639	THIO_MOUSE	P10639	P10639	-0.323094	0.323094	0.392897	12	5	-20.0646	0.799354	-1.25101	C57Bl6	alb-SREBP-1c	Thioredoxin	Txn	extracellular region,nucleus,cytoplasm,mitochondrion,cytosol	thioredoxin-disulfide reductase activity,protein binding,protein disulfide oxidoreductase activity,peptide disulfide oxidoreductase activity,oxidoreductase activity, acting on a sulfur group of donors, disulfide as acceptor,protein-disulfide reductase activity	negative regulation of transcription from RNA polymerase II promoter,transcription, DNA-templated,glycerol ether metabolic process,response to radiation,positive regulation of peptidyl-serine phosphorylation,regulation of protein import into nucleus, translocation,cellular response to oxidative stress,positive regulation of DNA binding,cell redox homeostasis,negative regulation of protein export …
C57Bl6 / alb-SREBP-1c	Q80WW9	DDRGK_MOUSE	Q80WW9	Q80WW9	-0.32186	0.32186	0.0393068	9	2	-19.9962	0.800038	-1.24994	C57Bl6	alb-SREBP-1c	DDRGK domain-containing protein 1	Ddrgk1	nucleolus,endoplasmic reticulum,endoplasmic reticulum membrane	RNA polymerase II repressing transcription factor binding,protein binding,ubiquitin-like protein ligase binding	positive regulation of cell proliferation,positive regulation of gene expression,negative regulation of gene expression,positive regulation of cell migration,positive regulation of proteasomal ubiquitin-dependent protein catabolic process,regulation of intracellular estrogen receptor signaling pathway,response to endoplasmic reticulum stress,negative regulation of apoptotic process,positive regul…
C57Bl6 / alb-SREBP-1c	Q9R099	TBL2_MOUSE	Q9R099	Q9R099	-0.321171	0.321171	0.0121261	25	9	-19.958	0.80042	-1.24934	C57Bl6	alb-SREBP-1c	Transducin beta-like protein 2	Tbl2	cytoplasm,endoplasmic reticulum	protein kinase binding,translation initiation factor binding,phosphoprotein binding	endoplasmic reticulum unfolded protein response,cellular response to glucose starvation,cellular response to hypoxia
C57Bl6 / alb-SREBP-1c	Q921X9	PDIA5_MOUSE	Q921X9	Q921X9	-0.321018	0.321018	0.00136196	80	29	-19.9495	0.800505	-1.24921	C57Bl6	alb-SREBP-1c	Protein disulfide-isomerase A5	Pdia5	endoplasmic reticulum,endoplasmic reticulum lumen	protein disulfide isomerase activity,peptide disulfide oxidoreductase activity	protein folding,response to endoplasmic reticulum stress,cell redox homeostasis,oxidation-reduction process
C57Bl6 / alb-SREBP-1c	Q9CZB0	C560_MOUSE	Q9CZB0	Q9CZB0	-0.319645	0.319645	0.604135	28	6	-19.8733	0.801267	-1.24802	C57Bl6	alb-SREBP-1c	Succinate dehydrogenase cytochrome b560 subunit, mitochondrial	Sdhc	mitochondrion,mitochondrial inner membrane,mitochondrial respiratory chain complex II, succinate dehydrogenase complex (ubiquinone),integral component of membrane	succinate dehydrogenase activity,electron carrier activity,heme binding,metal ion binding	tricarboxylic acid cycle,mitochondrial electron transport, succinate to ubiquinone
C57Bl6 / alb-SREBP-1c	P53798	FDFT_MOUSE	P53798	P53798	-0.318978	0.318978	0.587557	21	8	-19.8362	0.801638	-1.24745	C57Bl6	alb-SREBP-1c	Squalene synthase	Fdft1	endoplasmic reticulum,endoplasmic reticulum membrane,integral component of membrane	farnesyl-diphosphate farnesyltransferase activity,squalene synthase activity	cholesterol biosynthetic process,ergosterol biosynthetic process,isoprenoid biosynthetic process,farnesyl diphosphate metabolic process
C57Bl6 / alb-SREBP-1c	Q9D3B1	HACD2_MOUSE	Q9D3B1	Q9D3B1	-0.318145	0.318145	0.141043	6	2	-19.7899	0.802101	-1.24673	C57Bl6	alb-SREBP-1c	Very-long-chain (3R)-3-hydroxyacyl-CoA dehydratase 2	Hacd2	endoplasmic reticulum,integral component of endoplasmic reticulum membrane	3-hydroxyacyl-CoA dehydratase activity,enzyme binding,3R-hydroxyacyl-CoA dehydratase activity,Requires Ontology,3-hydroxy-behenoyl-CoA dehydratase activity,3-hydroxy-lignoceroyl-CoA dehydratase activity	sphingolipid biosynthetic process,fatty acid elongation,very long-chain fatty acid biosynthetic process
C57Bl6 / alb-SREBP-1c	Q3U2P1	SC24A_MOUSE	Q3U2P1	Q3U2P1	-0.316544	0.316544	0.256183	12	4	-19.7009	0.802991	-1.24534	C57Bl6	alb-SREBP-1c	Protein transport protein Sec24A	Sec24a	Golgi membrane,endoplasmic reticulum membrane,cytosol,COPII vesicle coat	zinc ion binding	intracellular protein transport,ER to Golgi vesicle-mediated transport,cholesterol homeostasis,regulation of low-density lipoprotein particle receptor biosynthetic process,positive regulation of protein secretion,cargo loading into COPII-coated vesicle
C57Bl6 / alb-SREBP-1c	Q9JIY7	NAT8_MOUSE	Q9JIY7	Q9JIY7	-0.316211	0.316211	0.255014	2	2	-19.6823	0.803177	-1.24506	C57Bl6	alb-SREBP-1c	N-acetyltransferase 8	Nat8	endoplasmic reticulum,endoplasmic reticulum membrane,endoplasmic reticulum-Golgi intermediate compartment,Golgi apparatus,integral component of membrane,endoplasmic reticulum-Golgi intermediate compartment membrane,late recombination nodule	lysine N-acetyltransferase activity, acting on acetyl phosphate as donor,N-acetyltransferase activity,cysteine-S-conjugate N-acetyltransferase activity	gastrulation with mouth forming second,glutathione metabolic process,negative regulation of cell adhesion,positive regulation of gene expression,peptidyl-lysine N6-acetylation,negative regulation of apoptotic process,beta-amyloid metabolic process
C57Bl6 / alb-SREBP-1c	Q9ERF3	WDR61_MOUSE	Q9ERF3	Q9ERF3	-0.316103	0.316103	0.557334	3	1	-19.6764	0.803236	-1.24496	C57Bl6	alb-SREBP-1c	WD repeat-containing protein 61	Wdr61	nucleus,nucleoplasm,cytoplasm,cytosol,Cdc73/Paf1 complex,transcriptionally active chromatin,Ski complex	molecular_function	transcription, DNA-templated,Wnt signaling pathway,positive regulation of transcription elongation from RNA polymerase II promoter,negative regulation of myeloid cell differentiation,positive regulation of transcription from RNA polymerase II promoter,positive regulation of histone H3-K4 methylation,histone H3-K4 trimethylation,positive regulation of histone H3-K79 methylation
C57Bl6 / alb-SREBP-1c	Q99K23	UFSP2_MOUSE	Q99K23	Q99K23	-0.31577	0.31577	0.0231943	24	12	-19.6578	0.803422	-1.24468	C57Bl6	alb-SREBP-1c	Ufm1-specific protease 2	Ufsp2	nucleus,cytoplasm,endoplasmic reticulum	thiolester hydrolase activity,UFM1 hydrolase activity	proteolysis,regulation of intracellular estrogen receptor signaling pathway
C57Bl6 / alb-SREBP-1c	Q00519	XDH_MOUSE	Q00519	Q00519	-0.314683	0.314683	0.60166	3	1	-19.5972	0.804028	-1.24374	C57Bl6	alb-SREBP-1c	Xanthine dehydrogenase/oxidase	Xdh	extracellular space,peroxisome,cytosol,sarcoplasmic reticulum	xanthine dehydrogenase activity,xanthine oxidase activity,iron ion binding,protein binding,electron carrier activity,oxidoreductase activity,oxidoreductase activity, acting on CH-OH group of donors,oxidoreductase activity, acting on the aldehyde or oxo group of donors,molybdenum ion binding,protein homodimerization activity,molybdopterin cofactor binding,flavin adenine dinucleotide binding,2 iron…	negative regulation of protein phosphorylation,negative regulation of endothelial cell proliferation,activation of cysteine-type endopeptidase activity involved in apoptotic process,lactation,xanthine catabolic process,negative regulation of gene expression,electron transport chain,regulation of epithelial cell differentiation,negative regulation of endothelial cell differentiation,negative regul…
C57Bl6 / alb-SREBP-1c	P42669	PURA_MOUSE	P42669	P42669	-0.314038	0.314038	0.266119	4	2	-19.5613	0.804387	-1.24318	C57Bl6	alb-SREBP-1c	Transcriptional activator protein Pur-alpha	Pura	nucleus,DNA replication factor A complex,cytoplasm,dendrite,neuronal cell body	translation repressor activity, nucleic acid binding,DNA binding,double-stranded DNA binding,double-stranded telomeric DNA binding,single-stranded DNA binding,transcription factor activity, sequence-specific DNA binding,RNA binding,protein binding,transcription factor binding,purine-rich negative regulatory element binding,SMAD binding	DNA unwinding involved in DNA replication,transcription, DNA-templated,apoptotic process,mitotic cell cycle checkpoint,nervous system development,cell proliferation,positive regulation of cell proliferation,negative regulation of translation,cell differentiation,negative regulation of transcription, DNA-templated
C57Bl6 / alb-SREBP-1c	P34914	HYES_MOUSE	P34914	P34914	-0.31369	0.31369	9.73985e-12	369	47	-19.5419	0.804581	-1.24288	C57Bl6	alb-SREBP-1c	Bifunctional epoxide hydrolase 2	Ephx2	peroxisome,cytosol	magnesium ion binding,epoxide hydrolase activity,receptor binding,toxic substance binding,phosphatase activity,10-hydroxy-9-(phosphonooxy)octadecanoate phosphatase activity,lipid phosphatase activity,protein homodimerization activity	response to toxic substance,positive regulation of gene expression,dephosphorylation,cholesterol homeostasis,stilbene catabolic process,phospholipid dephosphorylation,regulation of cholesterol metabolic process,epoxide metabolic process
C57Bl6 / alb-SREBP-1c	Q9D020;Q9D020-1	5NT3A_MOUSE	Q9D020;Q9D020-1	Q9D020;Q9D020-1	-0.313353	0.313353	0.566431	4	2	-19.5231	0.804769	-1.24259	C57Bl6	alb-SREBP-1c	Cytosolic 5'-nucleotidase 3A;Isoform 1 of Cytosolic 5'-nucleotidase 3A	Nt5c3a	cytoplasm,mitochondrion,endoplasmic reticulum;	nucleotide binding,magnesium ion binding,5'-nucleotidase activity,transferase activity;	nucleotide metabolic process,dephosphorylation,adenosine metabolic process,defense response to virus;
C57Bl6 / alb-SREBP-1c	Q8K1M6;Q8K1M6-2;Q8K1M6-3;Q8K1M6-4	DNM1L_MOUSE	Q8K1M6;Q8K1M6-2;Q8K1M6-3;Q8K1M6-4	Q8K1M6;Q8K1M6-2;Q8K1M6-3;Q8K1M6-4	-0.312994	0.312994	0.320231	6	3	-19.503	0.80497	-1.24228	C57Bl6	alb-SREBP-1c	Dynamin-1-like protein;Isoform 2 of Dynamin-1-like protein;Isoform 3 of Dynamin-1-like protein;Isoform 4 of Dynamin-1-like protein	Dnm1l	cytoplasm,mitochondrion,mitochondrial outer membrane,peroxisome,Golgi apparatus,cytosol,microtubule,brush border,clathrin-coated pit,microtubule cytoskeleton,cell junction,synaptic vesicle membrane,macromolecular complex,intracellular membrane-bounded organelle,perinuclear region of cytoplasm,mitochondrion-derived vesicle;;;	GTPase activity,protein binding,GTP binding,microtubule binding,lipid binding,Rab GTPase binding,GTP-dependent protein binding,ubiquitin protein ligase binding,identical protein binding,protein homodimerization activity;;;	mitochondrial fission,release of cytochrome c from mitochondria,dynamin family protein polymerization involved in mitochondrial fission,endocytosis,mitochondrion organization,regulation of mitochondrion organization,peroxisome fission,regulation of protein oligomerization,positive regulation of apoptotic process,mitochondrial fragmentation involved in apoptotic process,intracellular distribution …
C57Bl6 / alb-SREBP-1c	P35293	RAB18_MOUSE	P35293	P35293	-0.312109	0.312109	8.87719e-05	44	13	-19.4537	0.805463	-1.24152	C57Bl6	alb-SREBP-1c	Ras-related protein Rab-18	Rab18	intracellular,Golgi apparatus,basal plasma membrane,apical plasma membrane,endoplasmic reticulum tubular network	GTPase activity,GTP binding,GDP binding	eye development,brain development,protein transport,lipid particle organization,nuclear import,endoplasmic reticulum tubular network organization
C57Bl6 / alb-SREBP-1c	Q9DBI0	TMPS6_MOUSE	Q9DBI0	Q9DBI0	-0.311556	0.311556	0.148902	2	2	-19.4228	0.805772	-1.24105	C57Bl6	alb-SREBP-1c	Transmembrane protease serine 6	Tmprss6	extracellular space,plasma membrane,integral component of membrane	serine-type endopeptidase activity	negative regulation of transcription from RNA polymerase II promoter,proteolysis,cellular iron ion homeostasis,negative regulation of BMP signaling pathway,membrane protein proteolysis,fibrinolysis,negative regulation of transcription, DNA-templated,positive regulation of transcription from RNA polymerase II promoter,iron ion homeostasis,self proteolysis
C57Bl6 / alb-SREBP-1c	Q9D8N0	EF1G_MOUSE	Q9D8N0	Q9D8N0	-0.311498	0.311498	0.336077	14	7	-19.4196	0.805804	-1.241	C57Bl6	alb-SREBP-1c	Elongation factor 1-gamma	Eef1g	nucleus,cytoplasm,endoplasmic reticulum	translation elongation factor activity,glutathione transferase activity,cadherin binding	translational elongation,glutathione metabolic process
C57Bl6 / alb-SREBP-1c	P36536	SAR1A_MOUSE	P36536	P36536	-0.311373	0.311373	0.516644	2	1	-19.4125	0.805875	-1.24089	C57Bl6	alb-SREBP-1c	GTP-binding protein SAR1a	Sar1a	Golgi membrane,endoplasmic reticulum,Golgi apparatus,sarcoplasmic reticulum,COPII vesicle coat	GTP binding	intracellular protein transport,vesicle-mediated transport,cargo loading into COPII-coated vesicle,regulation of cargo loading into COPII-coated vesicle,negative regulation of cargo loading into COPII-coated vesicle
C57Bl6 / alb-SREBP-1c	Q6PDD0	UD2A2_MOUSE	Q6PDD0	Q6PDD0	-0.309646	0.309646	0.541096	17	4	-19.316	0.80684	-1.2394	C57Bl6	alb-SREBP-1c	UDP-glucuronosyltransferase 2A2	Ugt2a2	integral component of membrane,intracellular membrane-bounded organelle	glucuronosyltransferase activity	cellular glucuronidation
C57Bl6 / alb-SREBP-1c	Q9JIZ0	CMLO1_MOUSE	Q9JIZ0	Q9JIZ0	-0.309195	0.309195	5.53734e-07	34	11	-19.2908	0.807092	-1.23902	C57Bl6	alb-SREBP-1c	Probable N-acetyltransferase CML1	Cml1	mitochondrial inner membrane,endoplasmic reticulum,endoplasmic reticulum membrane,endoplasmic reticulum-Golgi intermediate compartment,Golgi apparatus,integral component of membrane,endoplasmic reticulum-Golgi intermediate compartment membrane,extracellular space	lysine N-acetyltransferase activity, acting on acetyl phosphate as donor,N-acetyltransferase activity	gastrulation with mouth forming second,negative regulation of cell adhesion,positive regulation of gene expression,peptidyl-lysine N6-acetylation,negative regulation of apoptotic process,beta-amyloid metabolic process
C57Bl6 / alb-SREBP-1c	Q9CQM2	ERD22_MOUSE	Q9CQM2	Q9CQM2	-0.308779	0.308779	0.316567	3	1	-19.2675	0.807325	-1.23866	C57Bl6	alb-SREBP-1c	ER lumen protein-retaining receptor 2	Kdelr2	endoplasmic reticulum,endoplasmic reticulum membrane,cis-Golgi network,integral component of membrane	molecular_function,ER retention sequence binding	protein retention in ER lumen,biological_process,protein transport,vesicle-mediated transport
C57Bl6 / alb-SREBP-1c	Q9JLJ5	ELOV1_MOUSE	Q9JLJ5	Q9JLJ5	-0.307919	0.307919	0.364202	3	1	-19.2194	0.807806	-1.23792	C57Bl6	alb-SREBP-1c	Elongation of very long chain fatty acids protein 1	Elovl1	endoplasmic reticulum,integral component of endoplasmic reticulum membrane	fatty acid elongase activity,3-oxo-arachidoyl-CoA synthase activity,3-oxo-cerotoyl-CoA synthase activity,3-oxo-lignoceronyl-CoA synthase activity,Requires Ontology	fatty acid elongation, saturated fatty acid,sphingolipid biosynthetic process,fatty acid elongation, monounsaturated fatty acid,fatty acid elongation, polyunsaturated fatty acid,very long-chain fatty acid biosynthetic process
C57Bl6 / alb-SREBP-1c	P50431	GLYC_MOUSE	P50431	P50431	-0.307546	0.307546	0.530511	5	3	-19.1985	0.808015	-1.2376	C57Bl6	alb-SREBP-1c	Serine hydroxymethyltransferase, cytosolic	Shmt1	nucleus,mitochondrion,cytosol	translation repressor activity, nucleic acid binding,glycine hydroxymethyltransferase activity,pyridoxal phosphate binding,identical protein binding,protein homodimerization activity,mRNA 5'-UTR binding,serine binding	dTMP biosynthetic process,glycine metabolic process,L-serine metabolic process,L-serine catabolic process,one-carbon metabolic process,purine nucleobase biosynthetic process,negative regulation of translation,glycine biosynthetic process from serine,tetrahydrofolate interconversion,tetrahydrofolate metabolic process,folic acid metabolic process,protein tetramerization,protein homotetramerization,…
C57Bl6 / alb-SREBP-1c	Q9DCQ2	ASPD_MOUSE	Q9DCQ2	Q9DCQ2	-0.307261	0.307261	0.160831	18	6	-19.1825	0.808175	-1.23736	C57Bl6	alb-SREBP-1c	Putative L-aspartate dehydrogenase	Aspdh	cellular_component	aspartate dehydrogenase activity,NADP binding	NADP catabolic process,NAD biosynthetic process,oxidation-reduction process
C57Bl6 / alb-SREBP-1c	Q9D024	CCD47_MOUSE	Q9D024	Q9D024	-0.305365	0.305365	2.47594e-06	52	18	-19.0763	0.809237	-1.23573	C57Bl6	alb-SREBP-1c	Coiled-coil domain-containing protein 47	Ccdc47	endoplasmic reticulum,rough endoplasmic reticulum,integral component of membrane	calcium ion binding	ER overload response,endoplasmic reticulum organization,post-embryonic development,ER-associated ubiquitin-dependent protein catabolic process,calcium ion homeostasis
C57Bl6 / alb-SREBP-1c	Q03311	CHLE_MOUSE	Q03311	Q03311	-0.30519	0.30519	0.606564	30	14	-19.0664	0.809336	-1.23558	C57Bl6	alb-SREBP-1c	Cholinesterase	Bche	extracellular space,nuclear envelope lumen,endoplasmic reticulum,endoplasmic reticulum lumen,membrane	acetylcholinesterase activity,cholinesterase activity,choline binding,identical protein binding	learning,negative regulation of cell proliferation,neuroblast differentiation,choline metabolic process,response to alkaloid,negative regulation of synaptic transmission,response to glucocorticoid,response to folic acid
C57Bl6 / alb-SREBP-1c	P46471	PRS7_MOUSE	P46471	P46471	-0.304846	0.304846	0.333836	2	1	-19.0471	0.809529	-1.23529	C57Bl6	alb-SREBP-1c	26S proteasome regulatory subunit 7	Psmc2	proteasome complex,cytoplasmic mRNA processing body,cytosol,proteasome regulatory particle, base subcomplex,proteasome accessory complex,nuclear proteasome complex,cytosolic proteasome complex,cytoplasmic ribonucleoprotein granule	protein binding,ATP binding,ATPase activity,TBP-class protein binding,proteasome-activating ATPase activity	ubiquitin-dependent protein catabolic process,ER-associated ubiquitin-dependent protein catabolic process,positive regulation of RNA polymerase II transcriptional preinitiation complex assembly,positive regulation of proteasomal protein catabolic process
C57Bl6 / alb-SREBP-1c	Q8K2I3	FMO2_MOUSE	Q8K2I3	Q8K2I3	-0.304491	0.304491	0.457214	8	4	-19.0272	0.809728	-1.23498	C57Bl6	alb-SREBP-1c	Dimethylaniline monooxygenase [N-oxide-forming] 2	Fmo2	endoplasmic reticulum membrane,membrane,integral component of membrane,organelle membrane	monooxygenase activity,N,N-dimethylaniline monooxygenase activity,flavin adenine dinucleotide binding,NADP binding	organic acid metabolic process,NADP metabolic process,xenobiotic metabolic process,toxin metabolic process,drug metabolic process,NADPH oxidation,oxygen metabolic process
C57Bl6 / alb-SREBP-1c	Q9Z1G3	VATC1_MOUSE	Q9Z1G3	Q9Z1G3	-0.302775	0.302775	0.227131	3	1	-18.9309	0.810691	-1.23351	C57Bl6	alb-SREBP-1c	V-type proton ATPase subunit C 1	Atp6v1c1	vacuolar proton-transporting V-type ATPase, V1 domain,lysosomal membrane,plasma membrane,cytoplasmic vesicle,apical part of cell	hydrogen-exporting ATPase activity, phosphorylative mechanism,proton-transporting ATPase activity, rotational mechanism	ATP hydrolysis coupled proton transport
C57Bl6 / alb-SREBP-1c	Q9QYI4	DJB12_MOUSE	Q9QYI4	Q9QYI4	-0.302509	0.302509	0.0172899	11	5	-18.9159	0.810841	-1.23329	C57Bl6	alb-SREBP-1c	DnaJ homolog subfamily B member 12	Dnajb12	endoplasmic reticulum,integral component of endoplasmic reticulum membrane,nuclear membrane	Hsp70 protein binding	cellular macromolecular complex assembly,ERAD pathway,chaperone mediated protein folding requiring cofactor,cellular response to misfolded protein
C57Bl6 / alb-SREBP-1c	P84078	ARF1_MOUSE	P84078	P84078	-0.302204	0.302204	0.00705084	32	9	-18.8987	0.811013	-1.23303	C57Bl6	alb-SREBP-1c	ADP-ribosylation factor 1	Arf1	Golgi membrane,late endosome,peroxisomal membrane,Golgi apparatus,trans-Golgi network,cytosol,endomembrane system,postsynaptic density,sarcomere,cell junction,COPI-coated vesicle,cell leading edge,macromolecular complex,neuron projection,postsynaptic membrane,perinuclear region of cytoplasm	magnesium ion binding,protein binding,GTP binding,GDP binding,protein domain specific binding,protein heterodimerization activity,phospholipase D activator activity	regulation of receptor internalization,cellular copper ion homeostasis,actin filament organization,protein transport,vesicle-mediated transport,regulation of Arp2/3 complex-mediated actin nucleation,very-low-density lipoprotein particle assembly,positive regulation of catalytic activity,positive regulation of endocytosis,positive regulation of calcium ion-dependent exocytosis,positive regulation …
C57Bl6 / alb-SREBP-1c	P80317	TCPZ_MOUSE	P80317	P80317	-0.301585	0.301585	0.0602167	28	13	-18.864	0.81136	-1.2325	C57Bl6	alb-SREBP-1c	T-complex protein 1 subunit zeta	Cct6a	acrosomal vesicle,zona pellucida receptor complex,cytosol,chaperonin-containing T-complex,microtubule,cell body	protein binding,ATP binding,protein binding involved in protein folding,unfolded protein binding,WD40-repeat domain binding	'de novo' protein folding,binding of sperm to zona pellucida,positive regulation of telomere maintenance via telomerase,protein stabilization,chaperone-mediated protein folding,toxin transport,positive regulation of establishment of protein localization to telomere,positive regulation of protein localization to Cajal body,positive regulation of telomerase RNA localization to Cajal body
C57Bl6 / alb-SREBP-1c	Q9DB05	SNAA_MOUSE	Q9DB05	Q9DB05	-0.301023	0.301023	0.0805634	18	8	-18.8323	0.811677	-1.23202	C57Bl6	alb-SREBP-1c	Alpha-soluble NSF attachment protein	Napa	vacuolar membrane,plasma membrane,myelin sheath,synaptobrevin 2-SNAP-25-syntaxin-1a complex	SNARE binding,soluble NSF attachment protein activity,protein binding,syntaxin binding,macromolecular complex binding	intracellular protein transport,brain development,regulation of synaptic vesicle priming,neuron differentiation,positive regulation of ATPase activity,synaptic transmission, glutamatergic,SNARE complex disassembly,apical protein localization,membrane fusion
C57Bl6 / alb-SREBP-1c	Q9JLJ4	ELOV2_MOUSE	Q9JLJ4	Q9JLJ4	-0.300712	0.300712	0.0121061	16	3	-18.8148	0.811852	-1.23175	C57Bl6	alb-SREBP-1c	Elongation of very long chain fatty acids protein 2	Elovl2	endoplasmic reticulum,integral component of endoplasmic reticulum membrane	fatty acid elongase activity,transferase activity, transferring acyl groups other than amino-acyl groups,3-oxo-arachidoyl-CoA synthase activity,3-oxo-cerotoyl-CoA synthase activity,3-oxo-lignoceronyl-CoA synthase activity,Requires Ontology	very long-chain fatty acid metabolic process,unsaturated fatty acid biosynthetic process,fatty acid elongation, saturated fatty acid,sphingolipid biosynthetic process,fatty acid elongation, monounsaturated fatty acid,fatty acid elongation, polyunsaturated fatty acid,very long-chain fatty acid biosynthetic process
C57Bl6 / alb-SREBP-1c	Q9QZ85	IIGP1_MOUSE	Q9QZ85	Q9QZ85	-0.300597	0.300597	0.176434	16	7	-18.8084	0.811916	-1.23165	C57Bl6	alb-SREBP-1c	Interferon-inducible GTPase 1	Iigp1	endoplasmic reticulum membrane,symbiont-containing vacuole membrane,nuclear membrane,Golgi cisterna membrane	GTPase activity,protein binding,GTP binding,GDP binding,identical protein binding	regulation of autophagy,cytokine-mediated signaling pathway,cellular response to interferon-beta,defense response to protozoan,innate immune response,defense response to Gram-negative bacterium
C57Bl6 / alb-SREBP-1c	Q8BP92	RCN2_MOUSE	Q8BP92	Q8BP92	-0.300365	0.300365	0.163221	3	1	-18.7953	0.812047	-1.23146	C57Bl6	alb-SREBP-1c	Reticulocalbin-2	Rcn2	nucleolus,endoplasmic reticulum,endoplasmic reticulum lumen	calcium ion binding,protein binding
C57Bl6 / alb-SREBP-1c	Q9CXE7	TMED5_MOUSE	Q9CXE7	Q9CXE7	-0.298278	0.298278	0.0703899	9	3	-18.6777	0.813223	-1.22968	C57Bl6	alb-SREBP-1c	Transmembrane emp24 domain-containing protein 5	Tmed5	endoplasmic reticulum membrane,endoplasmic reticulum-Golgi intermediate compartment,cis-Golgi network,integral component of membrane,endoplasmic reticulum-Golgi intermediate compartment membrane,endoplasmic reticulum exit site	molecular_function	protein transport,Golgi ribbon formation
C57Bl6 / alb-SREBP-1c	Q9CR62	M2OM_MOUSE	Q9CR62	Q9CR62	-0.297672	0.297672	8.36401e-08	85	20	-18.6436	0.813564	-1.22916	C57Bl6	alb-SREBP-1c	Mitochondrial 2-oxoglutarate/malate carrier protein	Slc25a11	mitochondrion,mitochondrial inner membrane,integral component of membrane	oxoglutarate:malate antiporter activity	mitochondrial transport,alpha-ketoglutarate transport
C57Bl6 / alb-SREBP-1c	Q8CFI2	UB2R1_MOUSE	Q8CFI2	Q8CFI2	-0.297071	0.297071	0.462481	3	1	-18.6097	0.813903	-1.22865	C57Bl6	alb-SREBP-1c	Ubiquitin-conjugating enzyme E2 R1	Cdc34	cytoplasm,cytosol,nuclear speck	ubiquitin-protein transferase activity,ATP binding,ubiquitin protein ligase binding,ubiquitin protein ligase activity,ubiquitin conjugating enzyme activity	protein polyubiquitination,protein monoubiquitination,cell cycle,protein ubiquitination,cellular response to interferon-beta,proteasome-mediated ubiquitin-dependent protein catabolic process,negative regulation of cAMP-mediated signaling,protein K48-linked ubiquitination
C57Bl6 / alb-SREBP-1c	Q99KU0	VMP1_MOUSE	Q99KU0	Q99KU0	-0.296863	0.296863	0.307536	9	3	-18.598	0.81402	-1.22847	C57Bl6	alb-SREBP-1c	Vacuole membrane protein 1	Vmp1	pre-autophagosomal structure,autophagosome membrane,nucleolus,endoplasmic reticulum,plasma membrane,membrane,integral component of membrane,endoplasmic reticulum-Golgi intermediate compartment membrane	molecular_function	exocytosis,autophagy,endoplasmic reticulum organization,Golgi organization,embryo implantation,cell junction assembly,cell-cell adhesion
C57Bl6 / alb-SREBP-1c	Q921H8	THIKA_MOUSE	Q921H8	Q921H8	-0.296223	0.296223	0.0144548	206	31	-18.5618	0.814382	-1.22793	C57Bl6	alb-SREBP-1c	3-ketoacyl-CoA thiolase A, peroxisomal	Acaa1a	mitochondrion,peroxisome,intracellular membrane-bounded organelle	acetyl-CoA C-acetyltransferase activity,acetate CoA-transferase activity,palmitoyl-CoA oxidase activity	very long-chain fatty acid metabolic process,fatty acid metabolic process,fatty acid beta-oxidation,bile acid metabolic process
C57Bl6 / alb-SREBP-1c	P61021	RAB5B_MOUSE	P61021	P61021	-0.296167	0.296167	0.45463	15	4	-18.5587	0.814413	-1.22788	C57Bl6	alb-SREBP-1c	Ras-related protein Rab-5B	Rab5b	intracellular,endosome,early endosome,plasma membrane,endocytic vesicle,early endosome membrane,melanosome,intracellular membrane-bounded organelle,extracellular exosome,anchored component of synaptic vesicle membrane	GTPase activity,protein binding,GTP binding,GDP binding,GTP-dependent protein binding	endosome organization,protein transport,antigen processing and presentation,regulation of endocytosis,plasma membrane to endosome transport
C57Bl6 / alb-SREBP-1c	Q8BX90	FND3A_MOUSE	Q8BX90	Q8BX90	-0.295887	0.295887	0.00629205	13	7	-18.5429	0.814571	-1.22764	C57Bl6	alb-SREBP-1c	Fibronectin type-III domain-containing protein 3A	Fndc3a	Golgi membrane,acrosomal vesicle,Golgi apparatus,cytosol,vesicle membrane,integral component of membrane,cytoplasmic vesicle		spermatid development,fertilization,Sertoli cell development,cell-cell adhesion
C57Bl6 / alb-SREBP-1c	P00688	AMYP_MOUSE	P00688	P00688	-0.295384	0.295384	0.418188	74	27	-18.5144	0.814856	-1.22721	C57Bl6	alb-SREBP-1c	Pancreatic alpha-amylase	Amy2	extracellular space	alpha-amylase activity,calcium ion binding,amylase activity,chloride ion binding,Requires Ontology	carbohydrate catabolic process
C57Bl6 / alb-SREBP-1c	P34927	ASGR1_MOUSE	P34927	P34927	-0.295322	0.295322	0.101858	22	10	-18.511	0.81489	-1.22716	C57Bl6	alb-SREBP-1c	Asialoglycoprotein receptor 1	Asgr1	integral component of membrane	asialoglycoprotein receptor activity,carbohydrate binding,protein homodimerization activity,metal ion binding	receptor-mediated endocytosis,cellular response to extracellular stimulus
C57Bl6 / alb-SREBP-1c	Q9ERY9	ERG28_MOUSE	Q9ERY9	Q9ERY9	-0.295246	0.295246	0.457214	11	3	-18.5066	0.814934	-1.22709	C57Bl6	alb-SREBP-1c	Probable ergosterol biosynthetic protein 28	Erg28	endoplasmic reticulum membrane,integral component of membrane,transport vesicle	protein binding, bridging	ergosterol biosynthetic process
C57Bl6 / alb-SREBP-1c	Q91YH5	ATLA3_MOUSE	Q91YH5	Q91YH5	-0.295037	0.295037	0.00148228	62	17	-18.4949	0.815051	-1.22692	C57Bl6	alb-SREBP-1c	Atlastin-3	Atl3	endoplasmic reticulum,integral component of membrane,endoplasmic reticulum tubular network,endoplasmic reticulum tubular network membrane	GTPase activity,GTP binding,identical protein binding	endoplasmic reticulum organization,Golgi organization,protein homooligomerization,positive regulation of endoplasmic reticulum tubular network organization
C57Bl6 / alb-SREBP-1c	P17427	AP2A2_MOUSE	P17427	P17427	-0.295012	0.295012	0.300081	44	18	-18.4935	0.815065	-1.2269	C57Bl6	alb-SREBP-1c	AP-2 complex subunit alpha-2	Ap2a2	plasma membrane,clathrin-coated pit,membrane coat,clathrin adaptor complex,secretory granule,cytoplasmic vesicle	protein binding,lipid binding,protein kinase binding,protein domain specific binding,clathrin adaptor activity,disordered domain specific binding	intracellular protein transport,vesicle-mediated transport,clathrin-dependent endocytosis,regulation of hematopoietic stem cell differentiation
C57Bl6 / alb-SREBP-1c	Q91X83	METK1_MOUSE	Q91X83	Q91X83	-0.295009	0.295009	0.211601	39	13	-18.4933	0.815067	-1.22689	C57Bl6	alb-SREBP-1c	S-adenosylmethionine synthase isoform type-1	Mat1a	cytosol	methionine adenosyltransferase activity,ATP binding,identical protein binding,metal ion binding	S-adenosylmethionine biosynthetic process,one-carbon metabolic process,methionine catabolic process,protein homotetramerization
C57Bl6 / alb-SREBP-1c	P97364	SPS2_MOUSE	P97364	P97364	-0.294726	0.294726	0.193339	23	10	-18.4773	0.815227	-1.22665	C57Bl6	alb-SREBP-1c	Selenide, water dikinase 2	Sephs2		selenide, water dikinase activity,ATP binding	selenium compound metabolic process,selenocysteine biosynthetic process,phosphorylation
C57Bl6 / alb-SREBP-1c	P70302	STIM1_MOUSE	P70302	P70302	-0.294039	0.294039	0.586578	25	9	-18.4384	0.815616	-1.22607	C57Bl6	alb-SREBP-1c	Stromal interaction molecule 1	Stim1	endoplasmic reticulum,microtubule,plasma membrane,integral component of plasma membrane,integral component of endoplasmic reticulum membrane,growth cone,cortical endoplasmic reticulum,macromolecular complex,sarcoplasmic reticulum membrane	protease binding,calcium channel regulator activity,calcium ion binding,protein binding,store-operated calcium channel activity,identical protein binding,microtubule plus-end binding	store-operated calcium entry,detection of calcium ion,cation transport,cellular calcium ion homeostasis,myotube differentiation,activation of store-operated calcium channel activity,positive regulation of angiogenesis,regulation of calcium ion transport,enamel mineralization,calcium ion transmembrane transport,regulation of store-operated calcium entry
C57Bl6 / alb-SREBP-1c	P24270	CATA_MOUSE	P24270	P24270	-0.293804	0.293804	0.257595	434	65	-18.4252	0.815748	-1.22587	C57Bl6	alb-SREBP-1c	Catalase	Cat	extracellular space,mitochondrion,mitochondrial intermembrane space,lysosome,peroxisome,peroxisomal membrane,endoplasmic reticulum,Golgi apparatus,cytosol,plasma membrane,intracellular membrane-bounded organelle	aminoacylase activity,catalase activity,receptor binding,antioxidant activity,oxidoreductase activity, acting on peroxide as acceptor,enzyme binding,heme binding,protein homodimerization activity,metal ion binding,NADP binding	response to reactive oxygen species,ureteric bud development,response to hypoxia,triglyceride metabolic process,response to oxidative stress,aging,cholesterol metabolic process,aerobic respiration,response to light intensity,UV protection,response to ozone,response to lead ion,positive regulation of phosphatidylinositol 3-kinase signaling,response to activity,response to inactivity,hemoglobin met…
C57Bl6 / alb-SREBP-1c	P20918	PLMN_MOUSE	P20918	P20918	-0.29364	0.29364	0.0372007	39	15	-18.4159	0.815841	-1.22573	C57Bl6	alb-SREBP-1c	Plasminogen	Plg	extracellular region,extracellular space,cell surface,extrinsic component of plasma membrane,extrinsic component of external side of plasma membrane,intracellular membrane-bounded organelle,other organism cell membrane	endopeptidase activity,serine-type endopeptidase activity,receptor binding,enzyme binding,kinase binding,protein domain specific binding,apolipoprotein binding,chaperone binding,proteasome core complex binding,protein antigen binding	proteolysis,blood coagulation,negative regulation of cell-substrate adhesion,negative regulation of angiogenesis,extracellular matrix disassembly,tissue regeneration,fibrinolysis,myoblast differentiation,muscle cell cellular homeostasis,tissue remodeling,proteolysis involved in cellular protein catabolic process,interaction with symbiont,negative regulation of fibrinolysis,positive regulation of …
C57Bl6 / alb-SREBP-1c	P68372	TBB4B_MOUSE	P68372	P68372	-0.292767	0.292767	0.0401554	48	16	-18.3665	0.816335	-1.22499	C57Bl6	alb-SREBP-1c	Tubulin beta-4B chain	Tubb4b	cytoplasm,microtubule,myelin sheath,tubulin complex	double-stranded RNA binding,GTPase activity,structural constituent of cytoskeleton,GTP binding	cytoskeleton organization,microtubule-based process
C57Bl6 / alb-SREBP-1c	Q91XD7	CREL1_MOUSE	Q91XD7	Q91XD7	-0.292726	0.292726	0.271319	11	6	-18.3642	0.816358	-1.22495	C57Bl6	alb-SREBP-1c	Cysteine-rich with EGF-like domain protein 1	Creld1	cellular_component,integral component of membrane	calcium ion binding	biological_process
C57Bl6 / alb-SREBP-1c	Q8VCM7	FIBG_MOUSE	Q8VCM7	Q8VCM7	-0.292357	0.292357	0.0146652	55	15	-18.3433	0.816567	-1.22464	C57Bl6	alb-SREBP-1c	Fibrinogen gamma chain	Fgg	fibrinogen complex,extracellular space,cell cortex,external side of plasma membrane,cell surface,platelet alpha granule	receptor binding,structural molecule activity,metal ion binding,cell adhesion molecule binding	adaptive immune response,cell-matrix adhesion,protein secretion,plasminogen activation,positive regulation of heterotypic cell-cell adhesion,cellular macromolecular complex assembly,fibrinolysis,innate immune response,positive regulation of vasoconstriction,positive regulation of exocytosis,positive regulation of protein secretion,protein polymerization,response to calcium ion,positive regulation…
C57Bl6 / alb-SREBP-1c	Q3UZ09	C1RL_MOUSE	Q3UZ09	Q3UZ09	-0.292115	0.292115	0.372422	2	1	-18.3296	0.816704	-1.22443	C57Bl6	alb-SREBP-1c	Complement C1r subcomponent-like protein	C1rl	extracellular space	serine-type endopeptidase activity	proteolysis,complement activation, classical pathway,innate immune response
C57Bl6 / alb-SREBP-1c	Q91V08	CLC2D_MOUSE	Q91V08	Q91V08	-0.291636	0.291636	0.518007	2	1	-18.3025	0.816975	-1.22403	C57Bl6	alb-SREBP-1c	C-type lectin domain family 2 member D	Clec2d	integral component of plasma membrane,external side of plasma membrane	transmembrane signaling receptor activity,protein binding,carbohydrate binding,natural killer cell lectin-like receptor binding	cellular defense response,signal transduction,protection from natural killer cell mediated cytotoxicity,negative regulation of osteoclast differentiation
C57Bl6 / alb-SREBP-1c	Q8BLF1	NCEH1_MOUSE	Q8BLF1	Q8BLF1	-0.291226	0.291226	0.51537	15	7	-18.2793	0.817207	-1.22368	C57Bl6	alb-SREBP-1c	Neutral cholesterol ester hydrolase 1	Nceh1	endoplasmic reticulum,membrane,integral component of membrane	serine hydrolase activity,phosphate ion binding,carboxylic ester hydrolase activity	protein dephosphorylation,xenobiotic metabolic process,catabolic process,lipid catabolic process,SMAD protein signal transduction
C57Bl6 / alb-SREBP-1c	Q6PCN7	HLTF_MOUSE	Q6PCN7	Q6PCN7	-0.290934	0.290934	0.157987	3	1	-18.2627	0.817373	-1.22343	C57Bl6	alb-SREBP-1c	Helicase-like transcription factor	Hltf	nucleus,nucleoplasm,nucleolus,cytoplasm	RNA polymerase II core promoter proximal region sequence-specific DNA binding,transcriptional activator activity, RNA polymerase II core promoter proximal region sequence-specific binding,helicase activity,ATP binding,zinc ion binding,ATPase activity,ubiquitin protein ligase binding,ubiquitin protein ligase activity	chromatin organization,regulation of transcription from RNA polymerase II promoter,transcription from RNA polymerase II promoter,protein ubiquitination,positive regulation of transcription from RNA polymerase II promoter
C57Bl6 / alb-SREBP-1c	Q9QXY6	EHD3_MOUSE	Q9QXY6	Q9QXY6	-0.290731	0.290731	0.233105	17	6	-18.2512	0.817488	-1.22326	C57Bl6	alb-SREBP-1c	EH domain-containing protein 3	Ehd3	cytoplasm,cytosol,ciliary pocket membrane,endocytic vesicle,myelin sheath,perinuclear region of cytoplasm,recycling endosome membrane	calcium ion binding,protein binding,ATP binding,GTP binding,lipid binding	receptor recycling,protein transport,endocytic recycling,early endosome to Golgi transport,protein homooligomerization,regulation of cardiac muscle contraction,cilium morphogenesis,protein localization to plasma membrane,regulation of cardiac muscle cell membrane potential,Golgi to lysosome transport,positive regulation of voltage-gated calcium channel activity,regulation of Golgi organization,re…
C57Bl6 / alb-SREBP-1c	P80314	TCPB_MOUSE	P80314	P80314	-0.289583	0.289583	0.304312	35	17	-18.1861	0.818139	-1.22229	C57Bl6	alb-SREBP-1c	T-complex protein 1 subunit beta	Cct2	zona pellucida receptor complex,cytosol,chaperonin-containing T-complex,microtubule,myelin sheath,cell body	ATP binding,ubiquitin protein ligase binding,protein binding involved in protein folding,unfolded protein binding	'de novo' protein folding,binding of sperm to zona pellucida,positive regulation of telomere maintenance via telomerase,protein stabilization,chaperone mediated protein folding independent of cofactor,chaperone-mediated protein complex assembly,positive regulation of telomerase activity,chaperone-mediated protein folding,scaRNA localization to Cajal body,toxin transport,positive regulation of est…
C57Bl6 / alb-SREBP-1c	Q9QXK3;Q9QXK3-3;Q9QXK3-4;Q9QZE5	COPG2_MOUSE;COPG2_MOUSE;COPG2_MOUSE;COPG1_MOUSE	Q9QXK3;Q9QXK3-3;Q9QXK3-4;Q9QZE5	Q9QXK3;Q9QXK3-3;Q9QXK3-4;Q9QZE5	-0.288764	0.288764	0.512559	3	1	-18.1397	0.818603	-1.22159	C57Bl6	alb-SREBP-1c	Coatomer subunit gamma-2;Isoform 3 of Coatomer subunit gamma-2;Isoform 4 of Coatomer subunit gamma-2;Coatomer subunit gamma-1	Copg2;Copg2;Copg2;Copg1	Golgi membrane,cytosol,COPI vesicle coat;;;Golgi membrane,Golgi apparatus,cytosol,COPI vesicle coat	structural molecule activity;;;structural molecule activity	intracellular protein transport,intra-Golgi vesicle-mediated transport;;;intracellular protein transport,vesicle-mediated transport
C57Bl6 / alb-SREBP-1c	P50285	FMO1_MOUSE	P50285	P50285	-0.288656	0.288656	0.0585444	112	33	-18.1336	0.818664	-1.2215	C57Bl6	alb-SREBP-1c	Dimethylaniline monooxygenase [N-oxide-forming] 1	Fmo1	endoplasmic reticulum membrane,integral component of membrane,organelle membrane	monooxygenase activity,N,N-dimethylaniline monooxygenase activity,flavin adenine dinucleotide binding,NADP binding	organic acid metabolic process,response to osmotic stress,toxin metabolic process,drug metabolic process,response to lipopolysaccharide,NADPH oxidation
C57Bl6 / alb-SREBP-1c	Q99KR3	LACB2_MOUSE	Q99KR3	Q99KR3	-0.288564	0.288564	0.532865	89	20	-18.1284	0.818716	-1.22142	C57Bl6	alb-SREBP-1c	Endoribonuclease LACTB2	Lactb2	mitochondrion,mitochondrial matrix	single-stranded RNA binding,endoribonuclease activity,zinc ion binding	RNA phosphodiester bond hydrolysis, endonucleolytic
C57Bl6 / alb-SREBP-1c	P16331	PH4H_MOUSE	P16331	P16331	-0.286815	0.286815	0.320956	52	21	-18.029	0.81971	-1.21994	C57Bl6	alb-SREBP-1c	Phenylalanine-4-hydroxylase	Pah		phenylalanine 4-monooxygenase activity,iron ion binding	L-phenylalanine catabolic process,oxidation-reduction process
C57Bl6 / alb-SREBP-1c	P56593	CP2AC_MOUSE	P56593	P56593	-0.286443	0.286443	2.58138e-12	162	37	-18.0079	0.819921	-1.21963	C57Bl6	alb-SREBP-1c	Cytochrome P450 2A12	Cyp2a12	endoplasmic reticulum membrane,organelle membrane	iron ion binding,arachidonic acid epoxygenase activity,steroid hydroxylase activity,heme binding,aromatase activity	epoxygenase P450 pathway,oxidation-reduction process
C57Bl6 / alb-SREBP-1c	P26041	MOES_MOUSE	P26041	P26041	-0.28631	0.28631	0.511183	7	5	-18.0003	0.819997	-1.21952	C57Bl6	alb-SREBP-1c	Moesin	Msn	uropod,cytosol,cytoskeleton,plasma membrane,microvillus,cell surface,basolateral plasma membrane,apical plasma membrane,filopodium,pseudopodium,microvillus membrane,myelin sheath,apical part of cell,perinuclear region of cytoplasm,invadopodium,cell periphery,focal adhesion	double-stranded RNA binding,actin binding,receptor binding,protein binding,enzyme binding,protein kinase binding,cell adhesion molecule binding	immunological synapse formation,regulation of cell shape,regulation of cell size,positive regulation of gene expression,gland morphogenesis,membrane to membrane docking,T cell proliferation,establishment of epithelial cell apical/basal polarity,establishment of endothelial barrier,T cell aggregation,cellular response to testosterone stimulus,positive regulation of podosome assembly,T cell migrati…
C57Bl6 / alb-SREBP-1c	P10630;P10630-2	IF4A2_MOUSE	P10630;P10630-2	P10630;P10630-2	-0.286139	0.286139	0.435804	2	1	-17.9906	0.820094	-1.21937	C57Bl6	alb-SREBP-1c	Eukaryotic initiation factor 4A-II;Isoform 2 of Eukaryotic initiation factor 4A-II	Eif4a2	nucleolus,cytoplasm,perinuclear region of cytoplasm;	translation initiation factor activity,ATP-dependent RNA helicase activity,ATP binding,ATPase activity;	translational initiation,regulation of gene expression,RNA secondary structure unwinding,negative regulation of RNA-directed RNA polymerase activity,cellular response to leukemia inhibitory factor;
C57Bl6 / alb-SREBP-1c	Q9CXR1	DHRS7_MOUSE	Q9CXR1	Q9CXR1	-0.285433	0.285433	0.368161	19	8	-17.9505	0.820495	-1.21878	C57Bl6	alb-SREBP-1c	Dehydrogenase/reductase SDR family member 7	Dhrs7		oxidoreductase activity	biological_process,oxidation-reduction process
C57Bl6 / alb-SREBP-1c	Q8VBT0	TMX1_MOUSE	Q8VBT0	Q8VBT0	-0.284429	0.284429	0.477842	11	4	-17.8933	0.821067	-1.21793	C57Bl6	alb-SREBP-1c	Thioredoxin-related transmembrane protein 1	Tmx1	endoplasmic reticulum,endoplasmic reticulum membrane,integral component of membrane	protein disulfide isomerase activity,disulfide oxidoreductase activity	protein folding,response to endoplasmic reticulum stress,cell redox homeostasis,oxidation-reduction process
C57Bl6 / alb-SREBP-1c	Q9D0F3	LMAN1_MOUSE	Q9D0F3	Q9D0F3	-0.283157	0.283157	0.0469429	57	18	-17.8209	0.821791	-1.21685	C57Bl6	alb-SREBP-1c	Protein ERGIC-53	Lman1	Golgi membrane,endoplasmic reticulum membrane,endoplasmic reticulum-Golgi intermediate compartment,Golgi apparatus,integral component of membrane,sarcomere,ER to Golgi transport vesicle,endoplasmic reticulum-Golgi intermediate compartment membrane,host cell perinuclear region of cytoplasm	mannose binding,metal ion binding	ER to Golgi vesicle-mediated transport,endoplasmic reticulum organization,Golgi organization,positive regulation of organelle organization,protein transport
C57Bl6 / alb-SREBP-1c	Q9WVK4	EHD1_MOUSE	Q9WVK4	Q9WVK4	-0.28297	0.28297	0.129956	32	13	-17.8102	0.821898	-1.2167	C57Bl6	alb-SREBP-1c	EH domain-containing protein 1	Ehd1	endosome,early endosome,lipid particle,plasma membrane,endosome membrane,ciliary pocket membrane,endocytic vesicle,platelet dense tubular network membrane,early endosome membrane,myelin sheath,perinuclear region of cytoplasm,recycling endosome membrane	calcium ion binding,protein binding,ATP binding,GTP binding,Rab GTPase binding,identical protein binding,cadherin binding	intracellular protein transport,endocytosis,positive regulation of cholesterol storage,positive regulation of neuron projection development,endosomal transport,neuron projection development,endocytic recycling,low-density lipoprotein particle clearance,cholesterol homeostasis,protein homooligomerization,cilium morphogenesis,protein localization to cilium,positive regulation of myoblast fusion,cel…
C57Bl6 / alb-SREBP-1c	Q9QXF8	GNMT_MOUSE	Q9QXF8	Q9QXF8	-0.281815	0.281815	0.0390547	45	10	-17.7444	0.822556	-1.21572	C57Bl6	alb-SREBP-1c	Glycine N-methyltransferase	Gnmt	cytosol	folic acid binding,glycine binding,glycine N-methyltransferase activity,identical protein binding	glycogen metabolic process,regulation of gluconeogenesis,methionine metabolic process,one-carbon metabolic process,methylation,S-adenosylmethionine metabolic process,protein homotetramerization
C57Bl6 / alb-SREBP-1c	Q9DC37	MFSD1_MOUSE	Q9DC37	Q9DC37	-0.281486	0.281486	0.464044	2	1	-17.7257	0.822743	-1.21545	C57Bl6	alb-SREBP-1c	Major facilitator superfamily domain-containing protein 1	Mfsd1	cellular_component,integral component of membrane	molecular_function	biological_process,transmembrane transport
C57Bl6 / alb-SREBP-1c	Q9ER39	TOR1A_MOUSE	Q9ER39	Q9ER39	-0.280552	0.280552	0.357967	9	4	-17.6724	0.823276	-1.21466	C57Bl6	alb-SREBP-1c	Torsin-1A	Tor1a	nucleus,nuclear envelope,cytoplasm,endoplasmic reticulum,endoplasmic reticulum lumen,cytoskeleton,synaptic vesicle,membrane,cell junction,secretory granule,growth cone,cytoplasmic vesicle membrane,nuclear membrane,extrinsic component of endoplasmic reticulum membrane,intracellular membrane-bounded organelle	protein binding,ATP binding,cytoskeletal protein binding,ATPase activity,kinesin binding,unfolded protein binding,misfolded protein binding	protein deneddylation,response to oxidative stress,organelle organization,nuclear envelope organization,cell adhesion,neuron projection development,protein localization to nucleus,wound healing, spreading of cells,intermediate filament cytoskeleton organization,synaptic vesicle transport,chaperone mediated protein folding requiring cofactor,protein homooligomerization,regulation of dopamine uptak…
C57Bl6 / alb-SREBP-1c	Q8BK30	NDUV3_MOUSE	Q8BK30	Q8BK30	-0.27982	0.27982	0.340254	6	5	-17.6306	0.823694	-1.21404	C57Bl6	alb-SREBP-1c	NADH dehydrogenase [ubiquinone] flavoprotein 3, mitochondrial	Ndufv3	nucleoplasm,mitochondrion,mitochondrial respiratory chain complex I		mitochondrial ATP synthesis coupled electron transport
C57Bl6 / alb-SREBP-1c	P21107	TPM3_MOUSE	P21107	P21107	-0.279713	0.279713	0.288263	14	7	-17.6245	0.823755	-1.21395	C57Bl6	alb-SREBP-1c	Tropomyosin alpha-3 chain	Tpm3	stress fiber,podosome,cytoplasm,cytosol,muscle thin filament tropomyosin,actin cytoskeleton,growth cone,cortical cytoskeleton,neuron projection,filamentous actin,cleavage furrow	protein binding,structural constituent of muscle,actin filament binding	muscle contraction,actin filament organization
C57Bl6 / alb-SREBP-1c	Q8VCX1	AK1D1_MOUSE	Q8VCX1	Q8VCX1	-0.279215	0.279215	0.512832	6	2	-17.5961	0.824039	-1.21353	C57Bl6	alb-SREBP-1c	3-oxo-5-beta-steroid 4-dehydrogenase	Akr1d1	cytosol	3-oxo-5-beta-steroid 4-dehydrogenase activity,delta4-3-oxosteroid 5beta-reductase activity	bile acid biosynthetic process,cholesterol catabolic process,digestion,C21-steroid hormone metabolic process,androgen metabolic process,bile acid catabolic process,oxidation-reduction process
C57Bl6 / alb-SREBP-1c	O54950	AAKG1_MOUSE	O54950	O54950	-0.279192	0.279192	0.460197	3	1	-17.5948	0.824052	-1.21352	C57Bl6	alb-SREBP-1c	5'-AMP-activated protein kinase subunit gamma-1	Prkag1	nucleus,nucleoplasm,cytosol,nucleotide-activated protein kinase complex	protein kinase activity,AMP-activated protein kinase activity,ATP binding,AMP binding,protein kinase binding,ADP binding	protein phosphorylation,fatty acid biosynthetic process,positive regulation of gene expression,nuclear import
C57Bl6 / alb-SREBP-1c	O35643	AP1B1_MOUSE	O35643	O35643	-0.277314	0.277314	0.560979	5	2	-17.4874	0.825126	-1.21194	C57Bl6	alb-SREBP-1c	AP-1 complex subunit beta-1	Ap1b1	Golgi apparatus,trans-Golgi network,cytosol,clathrin adaptor complex,clathrin-coated vesicle membrane,intracellular membrane-bounded organelle	protein binding,protein kinase binding,clathrin binding	intracellular protein transport,determination of left/right symmetry,heart development,vesicle-mediated transport
C57Bl6 / alb-SREBP-1c	P17182	ENOA_MOUSE	P17182	P17182	-0.276531	0.276531	0.491264	51	15	-17.4426	0.825574	-1.21128	C57Bl6	alb-SREBP-1c	Alpha-enolase	Eno1	phosphopyruvate hydratase complex,cytoplasm,cytosol,plasma membrane,cell surface,membrane,extrinsic component of plasma membrane,myelin sheath,cell cortex region	magnesium ion binding,RNA polymerase II regulatory region sequence-specific DNA binding,transcriptional repressor activity, RNA polymerase II core promoter proximal region sequence-specific binding,transcriptional repressor activity, RNA polymerase II transcription regulatory region sequence-specific binding,RNA binding,phosphopyruvate hydratase activity,protein homodimerization activity,cadherin…	negative regulation of transcription from RNA polymerase II promoter,in utero embryonic development,glycolytic process,positive regulation of binding
C57Bl6 / alb-SREBP-1c	Q61334	BAP29_MOUSE	Q61334	Q61334	-0.27639	0.27639	0.232621	3	2	-17.4345	0.825655	-1.21116	C57Bl6	alb-SREBP-1c	B-cell receptor-associated protein 29	Bcap29	endoplasmic reticulum membrane,integral component of membrane		intracellular protein transport,ER to Golgi vesicle-mediated transport,apoptotic process,protein localization to endoplasmic reticulum exit site
C57Bl6 / alb-SREBP-1c	Q3T9Z9	ZUFSP_MOUSE	Q3T9Z9	Q3T9Z9	-0.27513	0.27513	0.46363	3	1	-17.3624	0.826376	-1.2101	C57Bl6	alb-SREBP-1c	Zinc finger with UFM1-specific peptidase domain protein	Zufsp		nucleic acid binding,metal ion binding	biological_process
C57Bl6 / alb-SREBP-1c	Q9CQF9	PCYOX_MOUSE	Q9CQF9	Q9CQF9	-0.274848	0.274848	0.000163856	61	17	-17.3462	0.826538	-1.20987	C57Bl6	alb-SREBP-1c	Prenylcysteine oxidase	Pcyox1	lysosome,vacuolar membrane,plasma membrane,very-low-density lipoprotein particle	prenylcysteine oxidase activity,chloride-transporting ATPase activity	prenylated protein catabolic process,prenylcysteine catabolic process,oxidation-reduction process,Requires Ontology,chloride transmembrane transport
C57Bl6 / alb-SREBP-1c	Q99J08	S14L2_MOUSE	Q99J08	Q99J08	-0.273821	0.273821	0.000210988	76	21	-17.2874	0.827126	-1.20901	C57Bl6	alb-SREBP-1c	SEC14-like protein 2	Sec14l2	nucleus,cytosol	lipid binding	transcription, DNA-templated,regulation of transcription, DNA-templated
C57Bl6 / alb-SREBP-1c	Q5SX39	MYH4_MOUSE	Q5SX39	Q5SX39	-0.273519	0.273519	4.9912e-05	79	30	-17.2701	0.827299	-1.20875	C57Bl6	alb-SREBP-1c	Myosin-4	Myh4	cytosol,myofibril,myosin filament	microfilament motor activity,double-stranded RNA binding,microtubule motor activity,calmodulin binding,ATP binding,microtubule binding,actin filament binding	muscle contraction,microtubule-based movement,response to activity
C57Bl6 / alb-SREBP-1c	P60335	PCBP1_MOUSE	P60335	P60335	-0.273132	0.273132	0.486213	12	4	-17.2479	0.827521	-1.20843	C57Bl6	alb-SREBP-1c	Poly(rC)-binding protein 1	Pcbp1	nucleus,nucleoplasm,cytoplasm,cytosol,nuclear speck,cytoplasmic ribonucleoprotein granule	RNA polymerase II transcription factor activity, sequence-specific DNA binding,single-stranded DNA binding,RNA binding,mRNA binding,mRNA 3'-UTR binding,protein binding,translation activator activity,cadherin binding,sequence-specific single stranded DNA binding	mRNA processing,viral RNA genome replication,positive regulation of translation,positive regulation of transcription from RNA polymerase II promoter
C57Bl6 / alb-SREBP-1c	Q9D6K5	SYJ2B_MOUSE	Q9D6K5	Q9D6K5	-0.272978	0.272978	0.00146121	30	7	-17.2391	0.827609	-1.2083	C57Bl6	alb-SREBP-1c	Synaptojanin-2-binding protein	Synj2bp	mitochondrion,mitochondrial outer membrane,integral component of mitochondrial outer membrane,perinuclear region of cytoplasm	protein binding	negative regulation of endothelial cell proliferation,protein targeting,endocytosis,cytoplasm organization,Rho protein signal transduction,regulation of Notch signaling pathway,negative regulation of endothelial cell migration,negative regulation of angiogenesis,regulation of endocytosis,intracellular distribution of mitochondria,negative regulation of ERK1 and ERK2 cascade,negative regulation of…
C57Bl6 / alb-SREBP-1c	P70694	DHB5_MOUSE	P70694	P70694	-0.272099	0.272099	0.131013	52	19	-17.1886	0.828114	-1.20756	C57Bl6	alb-SREBP-1c	Estradiol 17 beta-dehydrogenase 5	Akr1c6		retinal dehydrogenase activity,aldo-keto reductase (NADP) activity,estradiol 17-beta-dehydrogenase activity,oxidoreductase activity, acting on NAD(P)H, quinone or similar compound as acceptor,androsterone dehydrogenase activity	steroid biosynthetic process,steroid metabolic process,daunorubicin metabolic process,doxorubicin metabolic process,negative regulation of mRNA splicing, via spliceosome,oxidation-reduction process,cellular response to jasmonic acid stimulus
C57Bl6 / alb-SREBP-1c	Q62087	PON3_MOUSE	Q62087	Q62087	-0.270176	0.270176	0.0138438	38	11	-17.0782	0.829218	-1.20596	C57Bl6	alb-SREBP-1c	Serum paraoxonase/lactonase 3	Pon3	extracellular space,intracellular membrane-bounded organelle	aryldialkylphosphatase activity,arylesterase activity,3,4-dihydrocoumarin hydrolase activity,protein homodimerization activity,metal ion binding,dihydrocoumarin hydrolase activity,acyl-L-homoserine-lactone lactonohydrolase activity	response to toxic substance,phenylacetate catabolic process,dephosphorylation,aromatic compound catabolic process,negative regulation of superoxide anion generation,coumarin catabolic process,carboxylic acid catabolic process
C57Bl6 / alb-SREBP-1c	P11983	TCPA_MOUSE	P11983	P11983	-0.268947	0.268947	0.4748	20	8	-17.0075	0.829925	-1.20493	C57Bl6	alb-SREBP-1c	T-complex protein 1 subunit alpha	Tcp1	pericentriolar material,acrosomal vesicle,zona pellucida receptor complex,nuclear heterochromatin,Golgi apparatus,centrosome,microtubule organizing center,chaperonin-containing T-complex,microtubule,myelin sheath,cell body	protein binding,ATP binding,ubiquitin protein ligase binding,protein binding involved in protein folding,unfolded protein binding	'de novo' protein folding,binding of sperm to zona pellucida,positive regulation of telomere maintenance via telomerase,translocation of peptides or proteins into host cell cytoplasm,protein stabilization,positive regulation of telomerase activity,chaperone-mediated protein folding,scaRNA localization to Cajal body,toxin transport,positive regulation of establishment of protein localization to te…
C57Bl6 / alb-SREBP-1c	Q3UN04	UBP30_MOUSE	Q3UN04	Q3UN04	-0.268877	0.268877	0.113434	18	7	-17.0034	0.829966	-1.20487	C57Bl6	alb-SREBP-1c	Ubiquitin carboxyl-terminal hydrolase 30	Usp30	mitochondrion,mitochondrial outer membrane,integral component of membrane	cysteine-type endopeptidase activity,thiol-dependent ubiquitin-specific protease activity,protein binding,thiol-dependent ubiquitinyl hydrolase activity	mitophagy,ubiquitin-dependent protein catabolic process,mitochondrial fusion,protein deubiquitination,protein K11-linked deubiquitination,protein K6-linked deubiquitination,negative regulation of macromitophagy
C57Bl6 / alb-SREBP-1c	P53702	CCHL_MOUSE	P53702	P53702	-0.268839	0.268839	0.30396	10	14	-17.0013	0.829987	-1.20484	C57Bl6	alb-SREBP-1c	Cytochrome c-type heme lyase	Hccs	mitochondrion,mitochondrial inner membrane	holocytochrome-c synthase activity,protein binding,metal ion binding	cytochrome c-heme linkage
C57Bl6 / alb-SREBP-1c	Q9CQN7	RM41_MOUSE	Q9CQN7	Q9CQN7	-0.268795	0.268795	0.357716	7	7	-16.9988	0.830012	-1.2048	C57Bl6	alb-SREBP-1c	39S ribosomal protein L41, mitochondrial	Mrpl41	mitochondrion,mitochondrial large ribosomal subunit,ribonucleoprotein complex	structural constituent of ribosome	translation,apoptotic process,cell cycle
C57Bl6 / alb-SREBP-1c	Q9DD20	MET7B_MOUSE	Q9DD20	Q9DD20	-0.268495	0.268495	1.67241e-05	84	17	-16.9815	0.830185	-1.20455	C57Bl6	alb-SREBP-1c	Methyltransferase-like protein 7B	Mettl7b		methyltransferase activity	methylation
C57Bl6 / alb-SREBP-1c	O08795-2	GLU2B_MOUSE	O08795-2	O08795-2	-0.267793	0.267793	0.0108409	56	17	-16.9411	0.830589	-1.20396	C57Bl6	alb-SREBP-1c	Isoform 2 of Glucosidase 2 subunit beta	Prkcsh
C57Bl6 / alb-SREBP-1c	Q3TAS6;Q3TAS6-2	EMC10_MOUSE	Q3TAS6;Q3TAS6-2	Q3TAS6;Q3TAS6-2	-0.266921	0.266921	0.309864	4	3	-16.8909	0.831091	-1.20324	C57Bl6	alb-SREBP-1c	ER membrane protein complex subunit 10;Isoform 2 of ER membrane protein complex subunit 10	Emc10	extracellular region,integral component of membrane,ER membrane protein complex;	molecular_function;	biological_process;
C57Bl6 / alb-SREBP-1c	P97765;P97765-2	WBP2_MOUSE	P97765;P97765-2	P97765;P97765-2	-0.266635	0.266635	0.298753	6	2	-16.8744	0.831256	-1.203	C57Bl6	alb-SREBP-1c	WW domain-binding protein 2;Isoform 2 of WW domain-binding protein 2	Wbp2	nuclear chromatin,nucleus,cytoplasm;	RNA polymerase II core promoter sequence-specific DNA binding,RNA polymerase II transcription coactivator activity,transcription coactivator activity,protein binding,estrogen receptor binding,chromatin DNA binding;	transcription from RNA polymerase II promoter,response to progesterone,positive regulation of intracellular estrogen receptor signaling pathway,response to estrogen,establishment of protein localization,positive regulation of gene expression, epigenetic,positive regulation of transcription from RNA polymerase II promoter,progesterone receptor signaling pathway,cellular response to estrogen stimul…
C57Bl6 / alb-SREBP-1c	P01899	HA11_MOUSE	P01899	P01899	-0.264548	0.264548	0.0324854	41	13	-16.754	0.83246	-1.20126	C57Bl6	alb-SREBP-1c	H-2 class I histocompatibility antigen, D-B alpha chain	H2-D1
C57Bl6 / alb-SREBP-1c	Q9CQB5	CISD2_MOUSE	Q9CQB5	Q9CQB5	-0.264513	0.264513	0.0936248	18	5	-16.752	0.83248	-1.20123	C57Bl6	alb-SREBP-1c	CDGSH iron-sulfur domain-containing protein 2	Cisd2	mitochondrial outer membrane,endoplasmic reticulum,endoplasmic reticulum membrane,integral component of membrane,macromolecular complex,perinuclear region of cytoplasm	protein homodimerization activity,metal ion binding,2 iron, 2 sulfur cluster binding	mitophagy,multicellular organism aging,regulation of autophagy
C57Bl6 / alb-SREBP-1c	Q9CPW5	SSRB_MOUSE	Q9CPW5	Q9CPW5	-0.26424	0.26424	0.256082	4	2	-16.7363	0.832637	-1.201	C57Bl6	alb-SREBP-1c	Translocon-associated protein subunit beta	Ssr2	endoplasmic reticulum,endoplasmic reticulum membrane,integral component of membrane	molecular_function	cotranslational protein targeting to membrane
C57Bl6 / alb-SREBP-1c	Q5XG73;Q5XG73-2	ACBD5_MOUSE	Q5XG73;Q5XG73-2	Q5XG73;Q5XG73-2	-0.262356	0.262356	3.77169e-17	110	24	-16.6275	0.833725	-1.19944	C57Bl6	alb-SREBP-1c	Acyl-CoA-binding domain-containing protein 5;Isoform 2 of Acyl-CoA-binding domain-containing protein 5	Acbd5	nucleus,nucleoplasm,peroxisome,peroxisomal membrane,integral component of membrane;	fatty-acyl-CoA binding,molecular_function,lipid binding;	pexophagy;
C57Bl6 / alb-SREBP-1c	O88736	DHB7_MOUSE	O88736	O88736	-0.261093	0.261093	0.0834242	33	10	-16.5545	0.834455	-1.19839	C57Bl6	alb-SREBP-1c	3-keto-steroid reductase	Hsd17b7	endoplasmic reticulum,plasma membrane,integral component of membrane	3-keto sterol reductase activity,estradiol 17-beta-dehydrogenase activity	cholesterol biosynthetic process,estrogen biosynthetic process,oxidation-reduction process
C57Bl6 / alb-SREBP-1c	Q9EPB5	SERHL_MOUSE	Q9EPB5	Q9EPB5	-0.259439	0.259439	0.21104	32	11	-16.4587	0.835413	-1.19701	C57Bl6	alb-SREBP-1c	Serine hydrolase-like protein	Serhl	mitochondrion,peroxisome,cytoplasmic vesicle,perinuclear region of cytoplasm	hydrolase activity
C57Bl6 / alb-SREBP-1c	Q9CPU4	MGST3_MOUSE	Q9CPU4	Q9CPU4	-0.25929	0.25929	0.407811	5	4	-16.4501	0.835499	-1.19689	C57Bl6	alb-SREBP-1c	Microsomal glutathione S-transferase 3	Mgst3	nuclear envelope,endoplasmic reticulum,endoplasmic reticulum membrane,membrane,integral component of membrane,organelle membrane,intracellular membrane-bounded organelle	glutathione transferase activity,leukotriene-C4 synthase activity,glutathione peroxidase activity	lipid metabolic process,response to organonitrogen compound,leukotriene biosynthetic process,cellular oxidant detoxification
C57Bl6 / alb-SREBP-1c	P11930	NUD19_MOUSE	P11930	P11930	-0.259262	0.259262	0.319254	121	26	-16.4485	0.835515	-1.19687	C57Bl6	alb-SREBP-1c	Nucleoside diphosphate-linked moiety X motif 19	Nudt19	mitochondrion,peroxisome	receptor binding,hydrolase activity,metal ion binding
C57Bl6 / alb-SREBP-1c	Q9R049;Q9R049-2	AMFR_MOUSE	Q9R049;Q9R049-2	Q9R049;Q9R049-2	-0.258717	0.258717	0.26793	3	1	-16.4169	0.835831	-1.19641	C57Bl6	alb-SREBP-1c	E3 ubiquitin-protein ligase AMFR;Isoform 2 of E3 ubiquitin-protein ligase AMFR	Amfr	nucleus,endoplasmic reticulum,endoplasmic reticulum membrane,Golgi apparatus,integral component of plasma membrane,integral component of endoplasmic reticulum membrane,dendrite,growth cone,macromolecular complex,Derlin-1 retrotranslocation complex,neuronal cell body,perinuclear region of cytoplasm;	nucleotide binding,ubiquitin-protein transferase activity,protein binding,protein binding, bridging,ubiquitin-ubiquitin ligase activity,signaling receptor activity,identical protein binding,metal ion binding,chaperone binding,ubiquitin protein ligase activity,BAT3 complex binding,ubiquitin-specific protease binding;	protein polyubiquitination,ubiquitin-dependent protein catabolic process,aging,learning or memory,cellular process,ER-associated ubiquitin-dependent protein catabolic process,endoplasmic reticulum unfolded protein response,positive regulation of protein binding,protein oligomerization,protein autoubiquitination,protein K48-linked ubiquitination;
C57Bl6 / alb-SREBP-1c	Q9D706	RPAP3_MOUSE	Q9D706	Q9D706	-0.25753	0.25753	0.532464	3	1	-16.3481	0.836519	-1.19543	C57Bl6	alb-SREBP-1c	RNA polymerase II-associated protein 3	Rpap3	cytosol,R2TP complex	molecular_function	biological_process
C57Bl6 / alb-SREBP-1c	Q9CRA4	MSMO1_MOUSE	Q9CRA4	Q9CRA4	-0.257264	0.257264	0.158493	21	6	-16.3327	0.836673	-1.19521	C57Bl6	alb-SREBP-1c	Methylsterol monooxygenase 1	Msmo1	endoplasmic reticulum membrane,integral component of membrane	C-4 methylsterol oxidase activity,iron ion binding	sterol biosynthetic process,oxidation-reduction process
C57Bl6 / alb-SREBP-1c	Q8CI51	PDLI5_MOUSE	Q8CI51	Q8CI51	-0.257241	0.257241	0.332704	23	8	-16.3313	0.836687	-1.19519	C57Bl6	alb-SREBP-1c	PDZ and LIM domain protein 5	Pdlim5	cytosol,cell-cell adherens junction,postsynaptic density,actin cytoskeleton,Z disc,neuron projection,postsynaptic membrane	protein binding,metal ion binding,cadherin binding involved in cell-cell adhesion	regulation of synapse assembly,regulation of dendritic spine morphogenesis,cell-cell adhesion
C57Bl6 / alb-SREBP-1c	B1AR13	CISD3_MOUSE	B1AR13	B1AR13	-0.256593	0.256593	0.37467	11	6	-16.2938	0.837062	-1.19465	C57Bl6	alb-SREBP-1c	CDGSH iron-sulfur domain-containing protein 3, mitochondrial	Cisd3	mitochondrion	metal ion binding,2 iron, 2 sulfur cluster binding	biological_process
C57Bl6 / alb-SREBP-1c	Q9JJ59;Q9JJ59-2	ABCB9_MOUSE	Q9JJ59;Q9JJ59-2	Q9JJ59;Q9JJ59-2	-0.256472	0.256472	0.378319	3	1	-16.2867	0.837133	-1.19455	C57Bl6	alb-SREBP-1c	ATP-binding cassette sub-family B member 9;Isoform 2 of ATP-binding cassette sub-family B member 9	Abcb9	lysosome,lysosomal membrane,endoplasmic reticulum membrane,integral component of membrane,integral component of endoplasmic reticulum membrane,intracellular membrane-bounded organelle;	ATP binding,peptide-transporting ATPase activity,transmembrane transporter activity,protein homodimerization activity;	protein transport,peptide transport,transmembrane transport;
C57Bl6 / alb-SREBP-1c	Q99J56	DERL1_MOUSE	Q99J56	Q99J56	-0.255602	0.255602	0.0857993	6	2	-16.2363	0.837637	-1.19383	C57Bl6	alb-SREBP-1c	Derlin-1	Derl1	early endosome,late endosome,endoplasmic reticulum,integral component of membrane,integral component of endoplasmic reticulum membrane,Derlin-1-VIMP complex,Derlin-1 retrotranslocation complex,signal recognition particle receptor complex,signal recognition particle	protease binding,protein binding,ubiquitin protein ligase binding,MHC class I protein binding,ATPase binding,ubiquitin-specific protease binding	response to unfolded protein,ER-associated ubiquitin-dependent protein catabolic process,endoplasmic reticulum unfolded protein response,retrograde protein transport, ER to cytosol,positive regulation of protein ubiquitination,protein destabilization,positive regulation of protein binding,cellular response to unfolded protein,ERAD pathway,protein homooligomerization,ER-associated misfolded protei…
C57Bl6 / alb-SREBP-1c	Q8K2C9	HACD3_MOUSE	Q8K2C9	Q8K2C9	-0.254179	0.254179	0.0196094	29	8	-16.1536	0.838464	-1.19266	C57Bl6	alb-SREBP-1c	Very-long-chain (3R)-3-hydroxyacyl-CoA dehydratase 3	Hacd3	mitochondrion,endoplasmic reticulum,cytosol,integral component of endoplasmic reticulum membrane,nuclear membrane	protein binding,3-hydroxyacyl-CoA dehydratase activity,enzyme binding,Requires Ontology,3-hydroxy-behenoyl-CoA dehydratase activity,3-hydroxy-lignoceroyl-CoA dehydratase activity	I-kappaB kinase/NF-kappaB signaling,JNK cascade,Rho protein signal transduction,sphingolipid biosynthetic process,fatty acid elongation,very long-chain fatty acid biosynthetic process,positive regulation of viral genome replication,positive regulation by virus of viral protein levels in host cell
C57Bl6 / alb-SREBP-1c	Q8K157	GALM_MOUSE	Q8K157	Q8K157	-0.253398	0.253398	0.456018	4	2	-16.1082	0.838918	-1.19201	C57Bl6	alb-SREBP-1c	Aldose 1-epimerase	Galm	cytoplasm	aldose 1-epimerase activity,carbohydrate binding,protein homodimerization activity	carbohydrate metabolic process,glucose metabolic process,galactose metabolic process,galactose catabolic process via UDP-galactose
C57Bl6 / alb-SREBP-1c	Q9QY30	ABCBB_MOUSE	Q9QY30	Q9QY30	-0.252823	0.252823	0.395341	6	4	-16.0747	0.839253	-1.19154	C57Bl6	alb-SREBP-1c	Bile salt export pump	Abcb11	membrane,integral component of membrane,apical part of cell,intercellular canaliculus	ATP binding,canalicular bile acid transmembrane transporter activity,ATPase activity, coupled to transmembrane movement of substances	canalicular bile acid transport,transmembrane transport
C57Bl6 / alb-SREBP-1c	Q922B2	SYDC_MOUSE	Q922B2	Q922B2	-0.252299	0.252299	0.560745	6	5	-16.0442	0.839558	-1.1911	C57Bl6	alb-SREBP-1c	Aspartate--tRNA ligase, cytoplasmic	Dars	cytosol,aminoacyl-tRNA synthetase multienzyme complex	nucleic acid binding,aspartate-tRNA ligase activity,ATP binding	aspartyl-tRNA aminoacylation
C57Bl6 / alb-SREBP-1c	O55022	PGRC1_MOUSE	O55022	O55022	-0.252024	0.252024	0.00018111	55	15	-16.0283	0.839717	-1.19088	C57Bl6	alb-SREBP-1c	Membrane-associated progesterone receptor component 1	Pgrmc1	endoplasmic reticulum membrane,endomembrane system,membrane,integral component of membrane,organelle membrane	steroid binding,heme binding
C57Bl6 / alb-SREBP-1c	Q8VC28	AK1CD_MOUSE	Q8VC28	Q8VC28	-0.250564	0.250564	0.592105	5	2	-15.9433	0.840567	-1.18967	C57Bl6	alb-SREBP-1c	Aldo-keto reductase family 1 member C13	Akr1c13		aldo-keto reductase (NADP) activity	xenobiotic metabolic process,oxidation-reduction process
C57Bl6 / alb-SREBP-1c	P62196	PRS8_MOUSE	P62196	P62196	-0.250343	0.250343	0.518822	3	1	-15.9303	0.840697	-1.18949	C57Bl6	alb-SREBP-1c	26S proteasome regulatory subunit 8	Psmc5	proteasome complex,nucleus,holo TFIIH complex,cytoplasm,proteasome regulatory particle,proteasome regulatory particle, base subcomplex,inclusion body,proteasome accessory complex,cytoplasmic vesicle,nuclear proteasome complex,cytosolic proteasome complex,postsynapse	receptor binding,protein binding,ATP binding,transcription factor binding,TBP-class protein binding,thyrotropin-releasing hormone receptor binding,proteasome-activating ATPase activity	regulation of transcription from RNA polymerase II promoter,ER-associated ubiquitin-dependent protein catabolic process,proteasome-mediated ubiquitin-dependent protein catabolic process,negative regulation of transcription, DNA-templated,positive regulation of RNA polymerase II transcriptional preinitiation complex assembly,modulation of synaptic transmission,positive regulation of inclusion body…
C57Bl6 / alb-SREBP-1c	Q9CWP6;Q9CWP6-2;Q9CWP6-3;Q9CWP6-4	MSPD2_MOUSE	Q9CWP6;Q9CWP6-2;Q9CWP6-3;Q9CWP6-4	Q9CWP6;Q9CWP6-2;Q9CWP6-3;Q9CWP6-4	-0.250128	0.250128	0.557902	2	1	-15.9178	0.840822	-1.18931	C57Bl6	alb-SREBP-1c	Motile sperm domain-containing protein 2;Isoform 2 of Motile sperm domain-containing protein 2;Isoform 3 of Motile sperm domain-containing protein 2;Isoform 4 of Motile sperm domain-containing protein 2	Mospd2	integral component of plasma membrane;;;	molecular_function;;;	chemotaxis,positive regulation of neutrophil chemotaxis,positive regulation of monocyte chemotaxis;;;
C57Bl6 / alb-SREBP-1c	P52430	PON1_MOUSE	P52430	P52430	-0.24915	0.24915	0.152944	60	14	-15.8608	0.841392	-1.18851	C57Bl6	alb-SREBP-1c	Serum paraoxonase/arylesterase 1	Pon1	extracellular space,high-density lipoprotein particle,spherical high-density lipoprotein particle,intracellular membrane-bounded organelle	aryldialkylphosphatase activity,arylesterase activity,calcium ion binding,phospholipid binding,high-density lipoprotein particle binding,protein homodimerization activity,acyl-L-homoserine-lactone lactonohydrolase activity	blood circulation,cholesterol metabolic process,response to toxic substance,positive regulation of cholesterol efflux,dephosphorylation,aromatic compound catabolic process,response to nutrient levels,positive regulation of transporter activity,carboxylic acid catabolic process,organophosphate catabolic process,phosphatidylcholine metabolic process,positive regulation of binding,response to fatty …
[truncated: 1,362 more rows]
