# Supplementary material for: Fatty Liver Due to Increased de novo Lipogenesis: Alterations in the Hepatic Peroxisomal Proteome
Source: Front Cell Dev Biol. 2019 Oct 25;7:248. doi: 10.3389/fcell.2019.00248 (PMC6823594; doi:10.3389/fcell.2019.00248)
Supplement: Supplementary file 11 [file Table_10.xlsx]

## Sheet: Caption
Supplemental Table 10 IPATM Core expression analyses of peroxisomal fraction proteins with 1.5- fold differential abundance in C57Bl6 vs. alb-SREBP-1a mice.

## Sheet: IPA settings
© 2000-2019 QIAGEN. All rights reserved.
Analysis Details for My Projects->MPH->1.5x_mPexi_C57_alb_MPH_libM+P_oF_candidates
Workspace	My Projects
Project	MPH
Analysis	1.5x_mPexi_C57_alb_MPH_libM+P_oF_candidates
Date	Thu Mar 28 06:45:43 PDT 2019
Analysis ID	17613700
Analysis Settings
Cutoff before duplicate resolution	true
Resolve duplicate on	Expression foldchange
Color using	Expression foldchange
Cutoff for Expression logfoldchange	--
Cutoff for Expression qvalue	--
Cutoff for Expression logfoldchange	--
Cutoff for Expression foldchange	down regulated -1.5 and up regulated 1.5
Reference set	Ingenuity Knowledge Base (Genes Only)
Relationship to include	Direct and Indirect
Includes Endogenous Chemicals	Yes
Optional Analyses	My Pathways My List
Filter Summary
Consider only molecules and/or relationships where
(confidence = Experimentally Observed) AND
(mol. types = biologic drug OR chemical - endogenous mammalian OR chemical - endogenous non-mammalian OR chemical - kinase inhibitor OR chemical - other OR chemical - protease inhibitor OR chemical drug OR chemical reagent OR chemical toxicant OR complex OR cytokine OR disease OR enzyme OR function OR G-protein coupled receptor OR group OR growth factor OR ion channel OR kinase OR ligand-dependen…

## Sheet: Canonical Pathways
Ingenuity Canonical Pathways	-log(p-value)	p-value	zScore	Ratio	Molecules
EIF2 Signaling	58.4	3.98107e-59	-5.66667	0.275	RPL7A,RPL13A,RPS24,RPL37A,RPL23,RPS5,RPL26,RPS13,RPS19,RPL8,RPL14,RPL27A,RPL30,RPS6,EIF3A,RPS18,RPL11,RPLP2,RPL35,RPS7,RPL22,EIF5,RPS12,RPS16,RPL7,RPLP0,RPS9,RPL27,RPS15,RPS27L,RPS10,RPS26,RPL35A,RPS20,RPL6,RPL12,RPL5,RPL9,RPL28,RPL38,RPS15A,RPL3,RPS4Y1,RPL31,RPS8,RPL4,RPL18A,RPS25,RPL17,RPL21,RPL13,RPS2,RPSA,RPS3,RPL24,RPS17,RALA,RPS23,RPS28,EIF4E,HRAS,RPL10,RPL10A
Regulation of eIF4 and p70S6K Signaling	20.8	1.58489e-21		0.176	RPS27L,RPS10,RPS26,RPS24,RPS5,RPS20,RPS13,RPS19,RPS15A,RPS4Y1,RPS8,RPS25,RPS6,EIF3A,RPS18,RPS7,RPS2,RPSA,RPS12,RPS3,RPS16,RPS9,RPS17,RALA,RPS23,RPS28,EIF4E,HRAS,RPS15
mTOR Signaling	19	1e-19	-0.447214	0.144	RPS27L,RPS10,RPS26,PLD3,RPS24,RPS5,RPS20,RPS13,RPS19,RPS15A,RPS4Y1,RPS8,RPS25,RPS6,EIF3A,RPS18,RPS7,RPS2,RPS12,RPSA,RPS3,RPS16,RPS9,RPS17,RALA,RPS23,RPS28,EIF4E,HRAS,RPS15
Acyl-CoA Hydrolysis	4.49	3.23594e-05	0	0.333	PPT1,ACOT2,ACOT4,ACOT9
tRNA Charging	3.36	0.000436516	2.23607	0.128	DARS2,GARS,FARS2,SARS2,EARS2
Pentose Phosphate Pathway	3.17	0.000676083		0.273	TKT,G6PD,TALDO1
Arginine Degradation I (Arginase Pathway)	2.8	0.00158489		0.5	OAT,ARG1
Superpathway of Citrulline Metabolism	2.76	0.0017378		0.2	OAT,ASS1,ARG1
Glucocorticoid Receptor Signaling	2.69	0.00204174		0.0403	KRT17,KRT8,KRT1,KRT76,KRT18,KRT6B,KRT79,RALA,KRT13,BCL2L1,KRT72,KRT5,HRAS,KRT73
Chondroitin Sulfate Degradation (Metazoa)	2.67	0.00213796		0.188	GALNS,GM2A,ARSB
Tyrosine Degradation I	2.58	0.00263027		0.4	HGD,HPD
Arginine Biosynthesis IV	2.41	0.00389045		0.333	OAT,ASS1
Arginine Degradation VI (Arginase 2 Pathway)	2.41	0.00389045		0.333	OAT,ARG1
Lactose Degradation III	2.41	0.00389045		0.333	PSAP,GLB1
Urea Cycle	2.41	0.00389045		0.333	ASS1,ARG1
Pentose Phosphate Pathway (Non-oxidative Branch)	2.27	0.00537032		0.286	TKT,TALDO1
Stearate Biosynthesis I (Animals)	2.23	0.00588844	0	0.0909	PPT1,ACOT2,ACOT4,ACOT9
Caveolar-mediated Endocytosis Signaling	2.19	0.00645654		0.0704	ITGAV,COPB2,COPA,RAB5A,COPB1
Citrulline Biosynthesis	2.04	0.00912011		0.222	OAT,ARG1
Glycine Betaine Degradation	1.95	0.0112202		0.2	SARDH,BHMT
Phagosome Maturation	1.93	0.011749		0.0473	CTSH,RAB5A,YKT6,CTSC,CTSA,PRDX1,CTSZ
Glutamate Removal from Folates	1.78	0.0165959		1	GGH,
Sulfite Oxidation IV	1.78	0.0165959		1	SUOX,
autophagy	1.74	0.018197		0.0656	CTSH,CTSC,CTSA,CTSZ
Choline Biosynthesis III	1.73	0.0186209		0.154	PCYT1A,PLD3
Oleate Biosynthesis II (Animals)	1.73	0.0186209		0.154	SCD,FADS2
γ-glutamyl Cycle	1.73	0.0186209		0.154	OPLAH,ANPEP
PI3K/AKT Signaling	1.69	0.0204174	-1.63299	0.0465	RALA,SYNJ2,EIF4E,BCL2L1,HRAS,GYS2
Glycine Biosynthesis III	1.48	0.0331131		0.5	AGXT,
GM-CSF Signaling	1.34	0.0457088	-1	0.0494	RACK1,RALA,BCL2L1,HRAS
Inosine-5'-phosphate Biosynthesis II	1.31	0.0489779		0.333	PAICS,
Methionine Salvage II (Mammalian)	1.31	0.0489779		0.333	BHMT,
Tyrosine Biosynthesis IV	1.31	0.0489779		0.333	PCBD2,
Macropinocytosis Signaling	1.22	0.060256		0.0449	RAB5A,RALA,HRAS,ANKFY1
Bupropion Degradation	1.2	0.0630957		0.08	Cyp2c40 (includes others),CYP2S1
Cancer Drug Resistance By Drug Efflux	1.2	0.0630957		0.0545	RALA,YBX1,HRAS
Acetate Conversion to Acetyl-CoA	1.19	0.0645654		0.25	ACSS2,
Heme Biosynthesis from Uroporphyrinogen-III I	1.19	0.0645654		0.25	CPOX,
Pentose Phosphate Pathway (Oxidative Branch)	1.19	0.0645654		0.25	G6PD,
Phenylalanine Degradation I (Aerobic)	1.19	0.0645654		0.25	PCBD2,
Spermine and Spermidine Degradation I	1.19	0.0645654		0.25	PAOX,
Role of Tissue Factor in Cancer	1.17	0.0676083		0.0379	ITGAV,RALA,EIF4E,BCL2L1,HRAS
NAD Salvage Pathway II	1.17	0.0676083		0.0769	Nmnat3,ACP6
PEDF Signaling	1.14	0.0724436	1	0.0421	SERPINF1,RALA,BCL2L1,HRAS
Apoptosis Signaling	1.13	0.074131	0	0.0417	RALA,BCL2L1,HRAS,SPTAN1
SPINK1 Pancreatic Cancer Pathway	1.11	0.0776247		0.05	CTSA,CPQ,CELA1
Citrulline-Nitric Oxide Cycle	1.1	0.0794328		0.2	ASS1,
Creatine-phosphate Biosynthesis	1.1	0.0794328		0.2	CKMT2,
Acetone Degradation I (to Methylglyoxal)	1.06	0.0870964		0.0667	Cyp2c40 (includes others),CYP2S1
Activation of IRF by Cytosolic Pattern Recognition Receptors	1.06	0.0870964		0.0476	MAVS,TANK,ISG15
Nicotine Degradation II	1.03	0.0933254		0.0462	Cyp2c40 (includes others),CYP2S1,FMO3
PXR/RXR Activation	1.03	0.0933254		0.0462	SCD,CPT1A,G6PC
Glycogen Biosynthesis II (from UDP-D-Glucose)	1.02	0.0954993		0.167	GYS2,
NAD Biosynthesis III	1.02	0.0954993		0.167	Nmnat3,
Proline Biosynthesis II (from Arginine)	1.02	0.0954993		0.167	OAT,
Selenocysteine Biosynthesis II (Archaea and Eukaryotes)	1.02	0.0954993		0.167	SARS2,
UDP-N-acetyl-D-glucosamine Biosynthesis II	1.02	0.0954993		0.167	FMO3,
Glutathione-mediated Detoxification	1.01	0.0977237		0.0625	ANPEP,GGH
Insulin Receptor Signaling	1.01	0.0977237	-1.34164	0.034	RALA,SYNJ2,EIF4E,HRAS,GYS2
Cell Cycle: G1/S Checkpoint Regulation	1	0.1		0.0448	RPL5,RPL11,SKP2
B Cell Receptor Signaling	0.985	0.103514	-1	0.0309	Ighg2a,Ighg2b,RALA,SYNJ2,BCL2L1,HRAS
Remodeling of Epithelial Adherens Junctions	0.975	0.105925		0.0435	CTNNA2,RAB5A,RALA
Ethanol Degradation II	0.966	0.108143		0.0588	ACSS2,DHRS4
NAD Salvage Pathway III	0.958	0.110154		0.143	Nmnat3,
Phosphatidylcholine Biosynthesis I	0.958	0.110154		0.143	PCYT1A,
Thioredoxin Pathway	0.958	0.110154		0.143	TXNRD1,
Endometrial Cancer Signaling	0.934	0.116413		0.0417	CTNNA2,RALA,HRAS
B Cell Development	0.925	0.11885		0.0556	Ighg2a,Ighg2b
Superpathway of Methionine Degradation	0.905	0.124451		0.0541	BHMT,SUOX
Histidine Degradation III	0.904	0.124738		0.125	AMDHD1,
Virus Entry via Endocytic Pathways	0.88	0.131826		0.0339	AP3B1,RALA,HRAS,CXADR
Glioma Invasiveness Signaling	0.858	0.138676		0.0385	ITGAV,RALA,HRAS
Heme Biosynthesis II	0.856	0.139316		0.111	CPOX,
Oncostatin M Signaling	0.85	0.141254		0.05	RALA,HRAS
Estrogen Biosynthesis	0.833	0.146893		0.0488	Cyp2c40 (includes others),CYP2S1
PTEN Signaling	0.833	0.146893	1	0.0325	RALA,SYNJ2,BCL2L1,HRAS
IL-15 Signaling	0.79	0.162181		0.0357	RALA,BCL2L1,HRAS
Role of RIG1-like Receptors in Antiviral Innate Immunity	0.784	0.164437		0.0455	MAVS,TANK
Non-Small Cell Lung Cancer Signaling	0.78	0.165959		0.0353	FHIT,RALA,HRAS
Purine Nucleotides De Novo Biosynthesis II	0.776	0.167494		0.0909	PAICS,
Acute Phase Response Signaling	0.776	0.167494	0	0.0284	FTL,SERPINF1,HNRNPK,RALA,HRAS
Small Cell Lung Cancer Signaling	0.759	0.174181		0.0345	FHIT,SKP2,BCL2L1
Thyroid Cancer Signaling	0.754	0.176198		0.0435	RALA,HRAS
Sertoli Cell-Sertoli Cell Junction Signaling	0.729	0.186638		0.0273	SPTBN1,CTNNA2,RALA,HRAS,SPTAN1
JAK/Stat Signaling	0.72	0.190546		0.033	RALA,BCL2L1,HRAS
Autoimmune Thyroid Disease Signaling	0.712	0.194089		0.0408	Ighg2a,Ighg2b
Hematopoiesis from Pluripotent Stem Cells	0.712	0.194089		0.0408	Ighg2a,Ighg2b
UVC-Induced MAPK Signaling	0.712	0.194089		0.0408	RALA,HRAS
FLT3 Signaling in Hematopoietic Progenitor Cells	0.71	0.194984		0.0326	RALA,EIF4E,HRAS
α-Adrenergic Signaling	0.71	0.194984		0.0326	RALA,HRAS,GYS2
NAD Phosphorylation and Dephosphorylation	0.71	0.194984		0.0769	ACP6,
Systemic Lupus Erythematosus Signaling	0.705	0.197242		0.0254	Ighg2a,Ighg2b,RALA,SNRPD1,HRAS,C8A
Neuregulin Signaling	0.701	0.199067		0.0323	RPS6,RALA,HRAS
Primary Immunodeficiency Signaling	0.699	0.199986		0.04	Ighg2a,Ighg2b
NF-κB Activation by Viruses	0.683	0.207491		0.0316	ITGAV,RALA,HRAS
Phenylalanine Degradation IV (Mammalian, via Side Chain)	0.682	0.20797		0.0714	HPD,
IL-4 Signaling	0.674	0.211836		0.0312	RALA,SYNJ2,HRAS
PDGF Signaling	0.656	0.2208		0.0306	RALA,SYNJ2,HRAS
Glycogen Degradation III	0.655	0.221309		0.0667	GAA,
Histidine Degradation VI	0.655	0.221309		0.0667	AMDHD1,
Docosahexaenoic Acid (DHA) Signaling	0.649	0.224388		0.037	SERPINF1,BCL2L1
Triacylglycerol Degradation	0.649	0.224388		0.037	Ces1b/Ces1c,MGLL
Vitamin-C Transport	0.631	0.233884		0.0625	TXNRD1,
Nicotine Degradation III	0.626	0.236592		0.0357	Cyp2c40 (includes others),CYP2S1
NRF2-mediated Oxidative Stress Response	0.615	0.242661	-0.447214	0.0248	FTL,RALA,TXNRD1,PRDX1,HRAS
D-myo-inositol (1,4,5)-trisphosphate Degradation	0.608	0.246604		0.0588	SYNJ2,
Dermatan Sulfate Degradation (Metazoa)	0.608	0.246604		0.0588	GM2A,
Mitochondrial L-carnitine Shuttle Pathway	0.608	0.246604		0.0588	CPT1A,
γ-linolenate Biosynthesis II (Animals)	0.608	0.246604		0.0588	FADS2,
IL-8 Signaling	0.604	0.248886	0.447214	0.0245	ITGAV,PLD3,RALA,BCL2L1,HRAS
1D-myo-inositol Hexakisphosphate Biosynthesis II (Mammalian)	0.586	0.259418		0.0556	SYNJ2,
D-myo-inositol (1,3,4)-trisphosphate Biosynthesis	0.586	0.259418		0.0556	SYNJ2,
Induction of Apoptosis by HIV1	0.573	0.267301		0.0328	SLC25A4,BCL2L1
Actin Nucleation by ARP-WASP Complex	0.563	0.273527		0.0323	RALA,HRAS
VEGF Signaling	0.556	0.277971		0.027	RALA,BCL2L1,HRAS
Melanoma Signaling	0.554	0.279254		0.0317	RALA,HRAS
Regulation of Cellular Mechanics by Calpain Protease	0.554	0.279254		0.0317	RALA,HRAS
SAPK/JNK Signaling	0.549	0.282488		0.0268	HNRNPK,RALA,HRAS
Granzyme A Signaling	0.547	0.283792		0.05	SET,
The Visual Cycle	0.547	0.283792		0.05	DHRS4,
Chronic Myeloid Leukemia Signaling	0.542	0.287078		0.0265	RALA,BCL2L1,HRAS
UVA-Induced MAPK Signaling	0.542	0.287078		0.0265	RALA,BCL2L1,HRAS
Melatonin Degradation I	0.535	0.291743		0.0308	Cyp2c40 (includes others),CYP2S1
Pyridoxal 5'-phosphate Salvage Pathway	0.535	0.291743		0.0308	G6PC,PDXK
Maturity Onset Diabetes of Young (MODY) Signaling	0.53	0.295121		0.0476	FABP2,
Oxidative Ethanol Degradation III	0.53	0.295121		0.0476	ACSS2,
Mitochondrial Dysfunction	0.504	0.313329		0.0234	ATP5S,GPX4,TXN2,CPT1A
ERK5 Signaling	0.5	0.316228		0.029	RALA,HRAS
Superpathway of D-myo-inositol (1,4,5)-trisphosphate Metabolism	0.497	0.31842		0.0435	SYNJ2,
Superpathway of Melatonin Degradation	0.492	0.322107		0.0286	Cyp2c40 (includes others),CYP2S1
LXR/RXR Activation	0.491	0.322849		0.0248	LYZ,SERPINF1,SCD
Paxillin Signaling	0.491	0.322849		0.0248	ITGAV,RALA,HRAS
Pancreatic Adenocarcinoma Signaling	0.485	0.327341		0.0246	PLD3,RALA,BCL2L1
CNTF Signaling	0.484	0.328095		0.0282	RALA,HRAS
Glutathione Redox Reactions I	0.482	0.32961		0.0417	GPX4,
Ephrin B Signaling	0.476	0.334195		0.0278	HNRNPK,HRAS
IL-2 Signaling	0.476	0.334195		0.0278	RALA,HRAS
Thrombopoietin Signaling	0.476	0.334195		0.0278	RALA,HRAS
CDP-diacylglycerol Biosynthesis I	0.467	0.341193		0.04	AGPAT3,
Ethanol Degradation IV	0.467	0.341193		0.04	ACSS2,
Fc Epsilon RI Signaling	0.456	0.349945		0.0236	RALA,SYNJ2,HRAS
Antiproliferative Role of TOB in T Cell Signaling	0.454	0.35156		0.0385	SKP2,
Estrogen-mediated S-phase Entry	0.454	0.35156		0.0385	SKP2,
Lipid Antigen Presentation by CD1	0.454	0.35156		0.0385	PSAP,
Agrin Interactions at Neuromuscular Junction	0.453	0.352371		0.0267	RALA,HRAS
Sirtuin Signaling Pathway	0.452	0.353183		0.0205	G6PD,TIMM8B,ACSS2,SLC25A4,TOMM70,CPT1A
Endocannabinoid Developing Neuron Pathway	0.45	0.354813		0.0234	RALA,HRAS,MGLL
Phosphatidylglycerol Biosynthesis II (Non-plastidic)	0.441	0.362243		0.037	AGPAT3,
Chemokine Signaling	0.439	0.363915		0.026	RALA,HRAS
ErbB2-ErbB3 Signaling	0.439	0.363915		0.026	RALA,HRAS
Myc Mediated Apoptosis Signaling	0.439	0.363915		0.026	RALA,HRAS
Natural Killer Cell Signaling	0.439	0.363915		0.0231	RALA,SYNJ2,HRAS
Role of JAK1 and JAK3 in γc Cytokine Signaling	0.432	0.369828		0.0256	RALA,HRAS
Role of MAPK Signaling in the Pathogenesis of Influenza	0.425	0.375837		0.0253	RALA,HRAS
Phospholipase C Signaling	0.423	0.377572	-1	0.0205	Ighg2b,Ighg2a,PLD3,RALA,HRAS
ErbB4 Signaling	0.418	0.381944		0.025	RALA,HRAS
Estrogen Receptor Signaling	0.418	0.381944		0.0224	RALA,G6PC,HRAS
BMP signaling pathway	0.405	0.39355		0.0244	RALA,HRAS
SPINK1 General Cancer Pathway	0.405	0.39355		0.0244	RALA,HRAS
TNFR2 Signaling	0.405	0.39355		0.0333	TANK,
14-3-3-mediated Signaling	0.394	0.403645		0.0216	VIM,RALA,HRAS
GDNF Family Ligand-Receptor Interactions	0.392	0.405509		0.0238	RALA,HRAS
Neurotrophin/TRK Signaling	0.392	0.405509		0.0238	RALA,HRAS
p70S6K Signaling	0.389	0.408319		0.0214	RPS6,RALA,HRAS
Allograft Rejection Signaling	0.38	0.416869		0.0233	Ighg2a,Ighg2b
Angiopoietin Signaling	0.38	0.416869		0.0233	RALA,HRAS
Regulation of IL-2 Expression in Activated and Anergic T Lymphocytes	0.38	0.416869		0.0233	RALA,HRAS
Antiproliferative Role of Somatostatin Receptor 2	0.374	0.422669		0.023	RALA,HRAS
Estrogen-Dependent Breast Cancer Signaling	0.374	0.422669		0.023	RALA,HRAS
FcγRIIB Signaling in B Lymphocytes	0.374	0.422669		0.023	RALA,HRAS
Erythropoietin Signaling	0.368	0.428549		0.0227	RALA,HRAS
Retinoate Biosynthesis I	0.364	0.432514		0.0294	DHRS4,
IL-3 Signaling	0.357	0.439542		0.0222	RALA,HRAS
Renal Cell Carcinoma Signaling	0.357	0.439542		0.0222	RALA,HRAS
Prolactin Signaling	0.352	0.444631		0.022	RALA,HRAS
Epithelial Adherens Junction Signaling	0.349	0.447713		0.0201	CTNNA2,RALA,HRAS
Interferon Signaling	0.345	0.451856		0.0278	ISG15,
Clathrin-mediated Endocytosis Signaling	0.342	0.454988		0.0191	LYZ,RAB4A,AP3B1,RAB5A
Death Receptor Signaling	0.341	0.456037		0.0215	TANK,SPTAN1
IL-17 Signaling	0.341	0.456037		0.0215	RALA,HRAS
TGF-β Signaling	0.341	0.456037		0.0215	RALA,HRAS
Complement System	0.337	0.460257		0.027	C8A,
Noradrenaline and Adrenaline Degradation	0.337	0.460257		0.027	DHRS4,
Bladder Cancer Signaling	0.336	0.461318		0.0213	RALA,HRAS
LPS-stimulated MAPK Signaling	0.331	0.466659		0.0211	RALA,HRAS
Communication between Innate and Adaptive Immune Cells	0.326	0.472063		0.0208	Ighg2a,Ighg2b
HER-2 Signaling in Breast Cancer	0.326	0.472063		0.0208	RALA,HRAS
VEGF Family Ligand-Receptor Interactions	0.326	0.472063		0.0208	RALA,HRAS
3-phosphoinositide Degradation	0.313	0.486407		0.019	ACP6,SET,SYNJ2
Acute Myeloid Leukemia Signaling	0.311	0.488652		0.0202	RALA,HRAS
AMPK Signaling	0.309	0.490908		0.0183	RAB9B,CPT1A,AK2,GYS2
TR/RXR Activation	0.306	0.494311		0.02	THRSP,G6PC
nNOS Signaling in Skeletal Muscle Cells	0.305	0.49545		0.0244	SNTB2,
Ceramide Signaling	0.302	0.498884		0.0198	RALA,HRAS
PPAR Signaling	0.302	0.498884		0.0198	RALA,HRAS
Retinol Biosynthesis	0.298	0.503501		0.0238	DHRS4,
tRNA Splicing	0.298	0.503501		0.0238	SMPDL3A,
Prostate Cancer Signaling	0.293	0.509331		0.0194	RALA,HRAS
CDK5 Signaling	0.284	0.519996		0.019	RALA,HRAS
Melanocyte Development and Pigmentation Signaling	0.284	0.519996		0.019	RALA,HRAS
ErbB Signaling	0.28	0.524807		0.0189	RALA,HRAS
Cholecystokinin/Gastrin-mediated Signaling	0.276	0.529663		0.0187	RALA,HRAS
FAK Signaling	0.276	0.529663		0.0187	RALA,HRAS
FAT10 Cancer Signaling Pathway	0.271	0.535797		0.0217	EEF1A1,
Antioxidant Action of Vitamin C	0.268	0.539511		0.0183	PLD3,TXNRD1
PAK Signaling	0.268	0.539511		0.0183	RALA,HRAS
Triacylglycerol Biosynthesis	0.265	0.54325		0.0213	AGPAT3,
Cell Cycle: G2/M DNA Damage Checkpoint Regulation	0.253	0.55847		0.0204	SKP2,
Amyotrophic Lateral Sclerosis Signaling	0.252	0.559758		0.0177	RAB5A,BCL2L1
IGF-1 Signaling	0.252	0.559758		0.0177	RALA,HRAS
p53 Signaling	0.252	0.559758		0.0177	SCO2,BCL2L1
Mouse Embryonic Stem Cell Pluripotency	0.248	0.564937		0.0175	RALA,HRAS
TNFR1 Signaling	0.247	0.566239		0.02	TANK,
Germ Cell-Sertoli Cell Junction Signaling	0.241	0.574116		0.0167	CTNNA2,RALA,HRAS
T Cell Receptor Signaling	0.238	0.578096		0.0171	RALA,HRAS
G Beta Gamma Signaling	0.231	0.587489		0.0168	RALA,HRAS
Telomerase Signaling	0.231	0.587489		0.0168	RALA,HRAS
CD27 Signaling in Lymphocytes	0.231	0.587489		0.0189	BCL2L1,
Transcriptional Regulatory Network in Embryonic Stem Cells	0.226	0.594292		0.0185	SET,
HGF Signaling	0.224	0.597035		0.0165	RALA,HRAS
Unfolded protein response	0.217	0.606736		0.0179	OS9,
3-phosphoinositide Biosynthesis	0	1		0.0099	ACP6,SET
Actin Cytoskeleton Signaling	0	1		0.00866	RALA,HRAS
Adrenomedullin signaling pathway	0	1		0.00966	RALA,HRAS
Apelin Adipocyte Signaling Pathway	0	1		0.0125	GPX4,
Apelin Endothelial Signaling Pathway	0	1		0.0157	RALA,HRAS
Atherosclerosis Signaling	0	1		0.00781	LYZ,
Axonal Guidance Signaling	0	1		0.00602	RALA,EIF4E,HRAS
Breast Cancer Regulation by Stathmin1	0	1		0.00943	RALA,HRAS
CCR3 Signaling in Eosinophils	0	1		0.0146	RALA,HRAS
CD40 Signaling	0	1		0.0123	TANK,
CREB Signaling in Neurons	0	1		0.00913	RALA,HRAS
CXCR4 Signaling	0	1		0.0116	RALA,HRAS
Calcium Signaling	0	1		0.0146	Tpm4,MCU,Tpm1
Cardiac Hypertrophy Signaling	0	1		0.0124	RALA,EIF4E,HRAS
Cardiac β-adrenergic Signaling	0	1		0.0143	SMPDL3A,AKAP1
Cdc42 Signaling	0	1		0.00599	RALA,
Colorectal Cancer Metastasis Signaling	0	1		0.0118	RALA,BCL2L1,HRAS
Corticotropin Releasing Hormone Signaling	0	1		0.00699	KRT1,
Cyclins and Cell Cycle Regulation	0	1		0.0123	SKP2,
D-myo-inositol (1,4,5,6)-Tetrakisphosphate Biosynthesis	0	1		0.0139	ACP6,SET
D-myo-inositol (3,4,5,6)-tetrakisphosphate Biosynthesis	0	1		0.0139	ACP6,SET
D-myo-inositol-5-phosphate Metabolism	0	1		0.0123	ACP6,SET
Dendritic Cell Maturation	0	1		0.0102	Ighg2a,Ighg2b
EGF Signaling	0	1		0.0143	HRAS,
ERK/MAPK Signaling	0	1		0.0146	RALA,EIF4E,HRAS
Endocannabinoid Cancer Inhibition Pathway	0	1		0.00633	VIM,
Endothelin-1 Signaling	0	1		0.0151	PLD3,RALA,HRAS
Ephrin Receptor Signaling	0	1		0.0113	RALA,HRAS
FGF Signaling	0	1		0.0109	HRAS,
FXR/RXR Activation	0	1		0.0159	SERPINF1,G6PC
Fcγ Receptor-mediated Phagocytosis in Macrophages and Monocytes	0	1		0.0109	PLD3,
G-Protein Coupled Receptor Signaling	0	1		0.0106	RALA,SMPDL3A,HRAS
GNRH Signaling	0	1		0.0118	RALA,HRAS
GP6 Signaling Pathway	0	1		0.00741	COL6A2,
Gap Junction Signaling	0	1		0.00962	RALA,HRAS
Glioblastoma Multiforme Signaling	0	1		0.0118	RALA,HRAS
Glioma Signaling	0	1		0.0164	RALA,HRAS
Gustation Pathway	0	1		0.00649	SMPDL3A,
Gα12/13 Signaling	0	1		0.014	RALA,HRAS
Gαi Signaling	0	1		0.0164	RALA,HRAS
Gαq Signaling	0	1		0.0123	PLD3,GYS2
HIF1α Signaling	0	1		0.0159	RALA,HRAS
HIPPO signaling	0	1		0.0118	SKP2,
HMGB1 Signaling	0	1		0.0142	RALA,HRAS
Heparan Sulfate Biosynthesis	0	1		0.012	Ces1b/Ces1c,
Heparan Sulfate Biosynthesis (Late Stages)	0	1		0.0132	Ces1b/Ces1c,
Hepatic Fibrosis / Hepatic Stellate Cell Activation	0	1		0.00538	COL6A2,
Hereditary Breast Cancer Signaling	0	1		0.0132	RALA,HRAS
Huntington's Disease Signaling	0	1		0.0119	YKT6,BCL2L1,HRAS
Hypoxia Signaling in the Cardiovascular System	0	1		0.0135	UBE2L3,
IL-12 Signaling and Production in Macrophages	0	1		0.00676	LYZ,
IL-6 Signaling	0	1		0.0147	RALA,HRAS
IL-7 Signaling Pathway	0	1		0.0108	Ighg2b,
ILK Signaling	0	1		0.0102	VIM,KRT18
Integrin Signaling	0	1		0.0136	ITGAV,RALA,HRAS
Iron homeostasis signaling pathway	0	1		0.0146	FTL,SKP2
LPS/IL-1 Mediated Inhibition of RXR Function	0	1		0.0135	CPT1A,FMO3,FABP2
Leukocyte Extravasation Signaling	0	1		0.00469	CTNNA2,
Lymphotoxin β Receptor Signaling	0	1		0.0145	BCL2L1,
Molecular Mechanisms of Cancer	0	1		0.0102	CTNNA2,RALA,BCL2L1,HRAS
NER Pathway	0	1		0.00971	DDB1,
NF-κB Signaling	0	1		0.016	TANK,RALA,HRAS
NGF Signaling	0	1		0.016	RALA,HRAS
Neuroinflammation Signaling Pathway	0	1		0.00319	IDE,
Neuroprotective Role of THOP1 in Alzheimer's Disease	0	1		0.00833	IDE,
OX40 Signaling Pathway	0	1		0.0111	BCL2L1,
Opioid Signaling Pathway	0	1		0.00813	RALA,HRAS
Osteoarthritis Pathway	0	1		0.00474	CTNNA2,
Ovarian Cancer Signaling	0	1		0.0132	RALA,HRAS
Oxidative Phosphorylation	0	1		0.00917	ATP5S,
P2Y Purigenic Receptor Signaling Pathway	0	1		0.0143	RALA,HRAS
PI3K Signaling in B Lymphocytes	0	1		0.0148	RALA,HRAS
PKCθ Signaling in T Lymphocytes	0	1		0.012	RALA,HRAS
PPARα/RXRα Activation	0	1		0.0161	Cyp2c40 (includes others),RALA,HRAS
Phagosome Formation	0	1		0.0152	Ighg2a,Ighg2b
Phospholipases	0	1		0.0159	PLD3,
Production of Nitric Oxide and Reactive Oxygen Species in Macrophages	0	1		0.0051	LYZ,
Protein Kinase A Signaling	0	1		0.00752	SMPDL3A,GYS2,AKAP1
Protein Ubiquitination Pathway	0	1		0.0148	UBE2L3,SKP2,PSMD13,PSMA1
RAR Activation	0	1		0.00526	RPL7A,
Rac Signaling	0	1		0.0161	RALA,HRAS
Regulation of the Epithelial-Mesenchymal Transition Pathway	0	1		0.0102	RALA,HRAS
Relaxin Signaling	0	1		0.00613	SMPDL3A,
Renin-Angiotensin Signaling	0	1		0.0154	RALA,HRAS
RhoA Signaling	0	1		0.00813	SEPT2,
Role of Macrophages, Fibroblasts and Endothelial Cells in Rheumatoid Arthritis	0	1		0.0124	Ighg2b,Ighg2a,RALA,HRAS
Role of NANOG in Mammalian Embryonic Stem Cell Pluripotency	0	1		0.0154	RALA,HRAS
Role of NFAT in Cardiac Hypertrophy	0	1		0.00885	RALA,HRAS
Role of NFAT in Regulation of the Immune Response	0	1		0.0104	RALA,HRAS
Role of Pattern Recognition Receptors in Recognition of Bacteria and Viruses	0	1		0.00719	MAVS,
STAT3 Pathway	0	1		0.0152	RALA,HRAS
Salvage Pathways of Pyrimidine Ribonucleotides	0	1		0.0103	G6PC,
Serotonin Degradation	0	1		0.0135	DHRS4,
Signaling by Rho Family GTPases	0	1		0.00794	VIM,SEPT2
Superpathway of Inositol Phosphate Compounds	0	1		0.0127	ACP6,SET,SYNJ2
Synaptic Long Term Depression	0	1		0.0108	RALA,HRAS
Synaptic Long Term Potentiation	0	1		0.0159	RALA,HRAS
T Cell Exhaustion Signaling Pathway	0	1		0.011	RALA,HRAS
Thrombin Signaling	0	1		0.00948	RALA,HRAS
Tight Junction Signaling	0	1		0.0119	YKT6,SPTAN1
UVB-Induced MAPK Signaling	0	1		0.0147	EIF4E,
Xenobiotic Metabolism Signaling	0	1		0.0134	FTL,RALA,FMO3,HRAS
cAMP-mediated signaling	0	1		0.00881	SMPDL3A,AKAP1
fMLP Signaling in Neutrophils	0	1		0.0155	RALA,HRAS

## Sheet: Upstream Regulators
Upstream Regulator	Expr Fold Change	Molecule Type	Predicted Activation State	Activation z-score	p-value of overlap	Target molecules in dataset	Mechanistic Network
MYCN		transcription regulator	Inhibited	-6.529	4.86e-42	ABCD2,BCL2L1,EEF1A1,NCL,RPL10,RPL11,RPL12,RPL13,RPL13A,RPL17,RPL18A,RPL21,RPL22,RPL23,RPL24,RPL26,RPL27,RPL27A,RPL28,RPL3,RPL30,RPL31,RPL35,RPL35A,RPL37A,RPL38,RPL4,RPL5,RPL6,RPL7,RPL8,RPL9,RPLP0,RPLP2,RPS12,RPS13,RPS15,RPS16,RPS17,RPS19,RPS2,RPS20,RPS23,RPS24,RPS25,RPS26,RPS28,RPS3,RPS5,RPS6,RPS7,RPS8,RPS9,TMEM109,VIM
RICTOR		other	Activated	5.872	2.67e-36	BCL2L1,G6PC,ISG15,MRPL13,PSMA1,PSMD13,RPL10,RPL10A,RPL11,RPL12,RPL13A,RPL14,RPL17,RPL21,RPL22,RPL23,Rpl23a,RPL26,RPL28,RPL30,Rpl34 (includes others),RPL35A,RPL38,RPL4,RPL6,RPL7,RPL7A,RPL8,RPL9,RPLP0,Rplp1 (includes others),RPLP2,RPS10,RPS13,RPS15,RPS18,RPS19,RPS2,RPS23,RPS24,RPS26,RPS3,Rps3a1,RPS4Y1,RPS5,RPS6,RPS8,RPS9,RPSA	MYC,RICTOR,TP53
sirolimus		chemical drug	Activated	5.454	1.88e-28	ARG1,ASS1,BCL2L1,CREG1,DPP7,EEF1A1,EIF5,G6PD,GLA,ISG15,NCL,NEU1,PEX2,RACK1,RPL10,RPL10A,RPL13A,RPL18A,RPL21,RPL23,RPL27,RPL27A,RPL3,RPL30,RPL35,RPL37A,RPL38,RPL5,RPL7A,RPL8,RPLP0,RPS10,RPS12,RPS13,RPS15,RPS16,RPS17,RPS18,RPS19,RPS2,RPS20,RPS23,RPS24,RPS26,RPS3,RPS5,RPS6,RPS7,RPS8,RPS9,RPSA,SCD,SCPEP1,SNAP23,SRSF3,VIM	MYC,RICTOR,TP53,sirolimus
MYC		transcription regulator	Inhibited	-4.666	4.06e-18	ACOT12,AK2,AKAP1,ARG1,ASS1,BCL2L1,CNP,CPT1A,CTBS,Ear2 (includes others),EIF4E,FABP2,FADS2,G6PC,G6PD,GAA,GGH,GM2A,HRAS,KRT17,KRT6B,LYZ,MOGS,NCL,OAT,PAICS,PEX19,PLSCR1,RPL10,RPL11,RPL13,RPL21,RPL22,RPL23,RPL26,RPL27,RPL3,RPL30,RPL35,RPL5,RPL6,RPL7,RPL7A,RPL9,RPS12,RPS15A,RPS16,RPS18,RPS19,RPS20,RPS23,RPS6,RPS7,RPS9,SARDH,SCPEP1,SKP2,SNRPD1,SRSF1,TKT,TMEM97,Tpm1,TXNRD1,VIM,YBX1	MYC,PRKAA,TP53
POLG		enzyme			3.37e-17	RACK1,RPL13,RPL14,RPL23,RPL27A,RPL5,RPL7,RPS16,RPS19,RPS24,RPS25,RPS5,TPT1
5-fluorouracil		chemical drug	Activated	3.543	1.16e-15	BCL2L1,FDXR,GARS,MVP,NCL,RPL10,RPL10A,RPL11,RPL21,RPL23,RPL24,RPL27A,RPL30,RPL31,RPL35,RPL35A,RPL38,RPL5,RPL6,RPL7,RPL7A,RPS13,RPS15A,RPS16,RPS23,RPS28,RPS4Y1,RPS8,YBX1
HNF4A		transcription regulator		-0.836	4.95e-12	ABCD2,ACP6,ACSS2,ACY3,AK2,ANPEP,AP3B1,ARG1,ARL1,BCL2L1,BCLAF1,BHMT,CDK5RAP3,COA7,COPB1,COPB2,CPT1A,CTSA,CTSZ,CXADR,DCAF11,DCAF8,DDX25,DHRS4,EIF5,ETNPPL,FABP2,FDXR,FHIT,FMO3,G6PC,G6PD,GLA,GUF1,GUSB,GYS2,HAO2,HGD,HPD,KRT17,KRT8,MRPL4,MRPS35,NAGA,NLN,NUFIP1,NUTF2,ORMDL2,PCYT1A,PDK2,PEX12,PEX6,PIGS,PITPNB,PLSCR1,PRCP,PSAP,PSMA1,REXO2,RPL10,RPL12,RPL18A,RPL31,RPLP0,RPS18,RPS20,RPS25,RPS6,SARS2,SCD,SKP…
TP53		transcription regulator	Activated	2.477	6e-12	ACSS2,AP3B1,ASS1,ATP5S,BCL2L1,CENPE,Ces1b/Ces1c,CKMT2,COL6A2,COPB1,CPOX,CPT1A,CTSH,EEF1A1,EIF5,FDXR,FUCA1,G6PC,G6PD,GLB1,HDLBP,HRAS,ISG15,ITGAV,KCNMA1,Krt10,KRT18,KRT8,LYZ,MVP,NPHP4,OAT,PAICS,Pcmt1,PDK2,PEX2,PLPBP,PPT1,PSAP,PSMA1,RPL10,RPL12,Rpl34 (includes others),Rpl36,RPL5,RPL7,RPS12,RPS16,RPS18,RPS19,RPS20,RPS25,RPS26,RPS27L,RPS3,RPS5,RPSA,SCD,SCO2,SCPEP1,SGPL1,SKP2,SLC25A4,SRSF3,TALDO1,TANK,…	MYC,TP53
IL3		cytokine			7.27e-12	ARG1,BCL2L1,Ces1b/Ces1c,CPT1A,EEF1A1,ITGAV,NCL,PRG2,RALA,RPL10,RPL11,RPL13,Rpl23a,RPL3,RPL4,RPL5,RPL6,RPL7,RPS12,RPS16,RPS17,RPS19,RPS20,RPS3,RPS4Y1,RPS6,RPS7,YBX1	IL3,MYC,TP53
dihydrotestosterone		chemical - endogenous mammalian		-1.951	3.62e-11	BCL2L1,BGN,CPT1A,FTL,GPX4,KRT1,KRT5,LYZ,MGLL,Mup1 (includes others),RPL12,RPL27,RPL28,RPL3,RPL30,RPL37A,RPL5,RPL8,RPL9,Rplp1 (includes others),RPLP2,RPS12,RPS17,RPS20,RPS23,RPS24,RPS26,RPS28,Rps3a1,RPS4Y1,SCD,SELENOW,TALDO1,TKT,VIM
RRP1B		transcription regulator			5.58e-11	RPL11,RPL13,RPL13A,RPL14,RPL22,RPL27,RPL37A,RPL6,Rplp1 (includes others),RPS10,RPS19,RPS26,RPS3,RPS5,RPS8,RPS9
TCR		complex	Inhibited	-3.728	5.64e-11	AK2,BCL2L1,EIF4E,ISG15,RPL10A,RPL13A,RPL17,RPL18A,RPL22,RPL3,RPL30,RPL31,RPL38,RPL4,RPL5,RPL6,RPL7,RPL9,RPLP0,RPS13,RPS15,RPS16,RPS17,RPS2,RPS23,RPS3,RPSA,TALDO1	IL3,NFKBIA,TCR,TP53
ACOX1	-1.338	enzyme		1.161	4.04e-10	ACOT2,CPOX,CTBS,FABP2,G6PC,GPX4,HPD,KRT8,MGLL,Mup1 (includes others),Nat8f2,OAT,PEX11A,PLSCR1,RPL12,Rpl36,RPS24	ACOX1,CEBPA,PPARA,PPARG,SREBF1,STAT5B
CD 437		chemical drug	Activated	2.524	2.39e-09	AK2,ARSA,FTL,RPL10,RPL11,RPL13,RPL13A,RPL24,RPL8,RPLP2,RPS10,RPS15,RPS16,RPS17,RPS2,SET,SRSF3,TIMM8B,YBX1
tretinoin		chemical - endogenous mammalian		1.627	6.18e-09	ACSS2,ANPEP,ARG1,BCL2L1,BHMT,Ces1b/Ces1c,CPT1A,CREG1,CTSC,CYP2S1,EEF1A1,EIF4E,EIF5,GARS,GM2A,HNRNPF,HNRNPK,IDE,ISG15,KRT1,KRT18,KRT5,KRT72,NCL,NLN,Nnt,OAT,PCYT1A,PEX1,PLA2G15,PLSCR1,PRG2,RALA,RPL10,RPL11,RPL13,Rpl23a,RPL3,RPL4,RPL5,RPL6,RPL7,RPS12,RPS16,RPS17,RPS19,RPS20,RPS3,RPS4Y1,RPS6,RPS7,SCD,SCPEP1,SKP2,SLC7A2,STARD10,TPT1,VIM,YBX1	CEBPA,MYC,PPARG,TP53,tretinoin
ST1926		chemical drug	Activated	2.5	1.8e-08	AK2,ARSA,RPL10,RPL13,RPL18A,RPL24,RPL6,RPL8,RPS10,RPS15,RPS2,RPS26,SRSF3,TIMM8B,TPT1,YBX1
EPO		cytokine		-0.915	1.34e-07	BCL2L1,CREG1,CTSZ,EEF1A1,ETF1,G6PC,HNRNPF,RAB4A,RPL7,RPLP0,RPS23,Rps3a1,RPS4Y1,RPS6,RPS7,SKP2,SNAP23,SPTAN1,TPT1,YBX1	EPO,FOS
TFEB		transcription regulator	Activated	2.797	2.47e-07	ARSA,ARSB,CTSA,GALNS,GLA,NEU1,PSAP,SCPEP1
FAAH	-1.46	enzyme	Activated	2.646	5.55e-07	RPL17,RPL5,RPL7,RPS18,RPS2,Rps3a1,RPS6
KITLG		growth factor		0.6	5.73e-07	BCL2L1,CREG1,EEF1A1,ETF1,HNRNPF,ITGAV,PLSCR1,RAB4A,RPL7,RPLP0,RPS23,Rps3a1,RPS6,RPS7,SNAP23,Tpm4,TPT1	FOS,KITLG
PPARA		ligand-dependent nuclear receptor		-1.662	1.07e-06	ABCD2,ACOT2,ACSS2,AGXT,ARG1,ASS1,BCL2L1,C8A,CPT1A,Cyp2c40 (includes others),ELOVL5,FABP2,FADS2,G6PC,G6PD,HPD,KRT8,MGLL,Mup1 (includes others),PEX11A,SARDH,SCD,TALDO1,VNN1	CEBPA,FOXO1,MLXIPL,PPARA,PPARG,SREBF1,SREBF2,STAT5B,bezafibrate,docosahexaenoic acid,pirinixic acid
ciprofibrate		chemical drug		-0.786	1.3e-06	ACOT2,CPOX,G6PC,HPD,KRT8,MGLL,Mup1 (includes others),Nat8f2,OAT,PEX11A,PLSCR1,RPL12,SCD	ACOX1,CEBPA,PPARA,PPARG,SREBF1,STAT5B,ciprofibrate
miR-542-3p (miRNAs w/seed GUGACAG)		mature microrna		1.969	2.74e-06	RPL11,RPL22,RPS23,RPS28
1,2-dithiol-3-thione		chemical reagent	Inhibited	-2.384	2.9e-06	AGPAT3,BHMT,CELA1,CREG1,IDE,MGLL,PRDX1,PSMA1,PSMD13,RACK1,RPLP0,RPS16,THRSP,Tpm1,TXNRD1	1,2-dithiol-3-thione,NFE2L2
CDK4/6		group	Activated	2.333	3.11e-06	BCLAF1,EIF5,KRT1,PCYT1A,RPL10,RPL13,RPL27A,RPS6,TALDO1
NFE2L2		transcription regulator	Inhibited	-2.884	3.94e-06	AGPAT3,BCL2L1,BHMT,CELA1,CREG1,FTL,G6PD,IDE,MGLL,MOGS,OAT,PRDX1,PSMA1,PSMD13,RACK1,RPLP0,RPS16,TALDO1,THRSP,TKT,Tpm1,TXNRD1
methapyrilene		chemical drug		-0.707	4.58e-06	ASS1,BHMT,CPT1A,EEF1A1,GYS2,OPLAH,RPL13A,RPL27,RPS8,RPS9,SCD,TXNRD1
nitrofurantoin		chemical drug		-1.941	5.44e-06	ASS1,BCL2L1,CPT1A,EEF1A1,EIF4E,PCYT1A,PRDX1,RPL13,RPL13A,RPL27,RPL6,RPS8,RPS9
SREBF1		transcription regulator		-1.36	7.02e-06	ABCD2,ACSS2,BCL2L1,CXADR,FADS2,G6PC,G6PD,GLB1,OAT,PCYT1A,RNASET2,RPLP0,RPS24,SCD,THRSP,TMEM97	Insulin,MYC,PPARA,SREBF1,SREBF2
TSC2		other	Inhibited	-2.53	8.81e-06	ACSS2,CREG1,DPP7,GLA,NEU1,PRELP,PSMA1,SCD,SCPEP1,SMPDL3A,THRSP	TFEB,TSC2
TO-901317		chemical reagent		-1.55	1.34e-05	AGPAT3,ASS1,BCL2L1,CPT1A,ELOVL5,FABP2,FADS2,G6PC,G6PD,MGLL,Mup1 (includes others),SCD,SKP2,THRSP,TKT	CEBPA,FOXO1,Insulin,MYC,PPARA,PPARG,SREBF1,SREBF2,STAT5B,TO-901317
ciprofloxacin		chemical drug		0.632	1.82e-05	CTSA,GUSB,MAN2B2,PSAP,RPL10A,RPL12,Rpl34 (includes others),RPL7A,RPS18,VIM
KRT14		other			3.99e-05	KRT1,KRT17,KRT18,KRT5,KRT6B,KRT8
interferon beta-1a		biologic drug			4.47e-05	KRT1,RPL22,RPL24,RPL26,RPL27,RPL27A,RPL3,RPS19,RPS28,RPS7
ZBED1		enzyme			4.72e-05	RPL10A,RPL12,RPS6
anthralin		chemical drug			4.72e-05	BCL2L1,KRT1,KRT18
tanespimycin		chemical drug		1.938	5.88e-05	BCL2L1,KRT18,KRT8,RPL24,RPL27A,RPL30,RPL35,RPS16,RPS8,SCD	NFKBIA,tanespimycin
genistein		chemical drug	Activated	4.274	6.17e-05	ARG1,ARSA,BCL2L1,CTSA,CTSH,DNASE2,FUCA1,GALNS,GLB1,GM2A,GUSB,Igkv1-117,MANBA,NEU1,PLA2G15,PLBD2,PPT1,PSAP,SCPEP1	TFEB,genistein
dexamethasone		chemical drug		-0.525	7.96e-05	ACSS2,ACY3,AGPAT3,BCL2L1,BCLAF1,BGN,BHMT,C8A,COL6A2,COPA,CREG1,CXADR,CYP2S1,EEF1A1,EIF4E,EIF5,ETF1,FTL,G6PC,G6PD,HNRNPF,HPD,IDE,IGKC,ISG15,ITGAV,KRT17,KRT8,MRPL47,MVP,NAGA,NEU1,Nnt,PDK2,PECR,PRELP,PSAP,PSMA1,RAB4A,RPL26,RPL5,RPL7,RPLP0,RPS23,Rps3a1,RPS6,RPS7,SCD,SEC63,SERPINF1,SLC14A2,SMPDL3A,SPTBN1,THRSP,TMEM97,TPT1,VIM,VNN1	CEBPA,Insulin,MYC,PPARA,PPARG,SREBF1,SREBF2,dexamethasone
NF1		other	Activated	2.219	0.000116	BCL2L1,NCL,RPL10A,RPL21,RPS19
CAV1		transmembrane receptor			0.000151	ARG1,KRT18,KRT6B,KRT8,PDK2,RALA,RPL17,RPS13,RPS9,SLC7A2
fluvoxamine		chemical drug			0.000162	GLB1,PITPNA,RACK1,RPL13A,RPS9
doxifluridine		chemical drug		1.091	0.000163	FDXR,RPL10A,RPL3,RPS27L
KRAS		enzyme		-1.401	0.000218	ANPEP,ARG1,BCL2L1,BGN,CXADR,EEF1A1,EIF4E,EIF5,G6PD,ISG15,LYZ,MTRR,NCL,NUTF2,RPS6,RPSA,SCD,SKP2,TMEM109,Tpm1,VIM,VPS35	KRAS,MYC,TP53
IGF1R		transmembrane receptor		0.2	0.000219	ATP5S,BCL2L1,KRT5,KRT6B,PECR,RPL10A,RPL24,RPL3,RPL35A,RPL37A,RPL7,RPL9,RPS24,RPS26
beta-estradiol		chemical - endogenous mammalian		-1.79	0.000222	ANPEP,ARG1,BCL2L1,CNP,CPT1A,CTNNA2,CTSH,CXADR,DGUOK,EIF3A,FUCA1,G6PC,G6PD,GARS,GM2A,HDLBP,HNRNPK,HRAS,IDE,Igkv1-117,ISG15,ITGAV,Krt10,KRT13,KRT17,KRT18,KRT5,KRT6B,KRT8,LYZ,MGLL,PDK2,PITPNA,PSMA1,PTTG1IP,RALA,RER1,RPL17,RPL21,RPS13,RPS9,Rrbp1,SET,SKP2,SLC7A2,SMPDL3A,SPTAN1,SRSF1,TANK,THRSP,TRAM1,TXN2,TXNRD1,VIM	Insulin,MYC,PPARA,SREBF1,SREBF2,beta-estradiol
SLC29A1	-1.097	transporter		1	0.000258	FDXR,RPL10A,RPL3,RPS27L
SREBF2		transcription regulator	Inhibited	-2.63	0.000306	ACSS2,FADS2,G6PD,PCYT1A,SCD,THRSP,TMEM97	SREBF1,SREBF2
HRAS	1.57	enzyme		-1.696	0.000325	BCL2L1,COL6A2,COPB2,CPT1A,CTSC,CTSZ,GUSB,HRAS,IGKC,ITGAV,KRT18,LYZ,NLN,Pcmt1,PCYT1A,RPL23,RPL27A,RPL30,RPS10,RPS3,RPS6,Tpm1,Tpm4,VIM	HRAS,MYC,NFKBIA,SPP1,TP53
methylprednisolone		chemical drug		-0.077	0.000369	ANPEP,ARG1,ARSB,ASS1,CELA1,CNP,CREG1,CTNNA2,CTSC,CTSH,ELOVL5,G6PC,HPD,NCL,OPLAH,PCYT1A,PEX11A,SLC7A2,SNAP23,Tpm1,VIM
TFAP2A		transcription regulator		1.3	0.000372	BCL2L1,KRT5,PRDX1,PSAP,RPL6,RPL7,RPLP0,RPS5
PPP3CA		phosphatase			0.000388	CPT1A,FTL,KRT18,KRT8,PDK2,PSAP,VIM
CDH1		other		-1.572	0.000452	DDB1,FABP2,KRT13,KRT18,RALA,SKP2,VIM
FOS		transcription regulator		-1.155	0.000541	CTSH,FARS2,G6PC,GM2A,KRT13,Krt2,KRT8,PAOX,PRDX1,RPL9,RPLP0,RPS18,RPS24,RPS6,RPS7,RPS9,SCD,SNAP23,Tpm1,Tpm4,VIM
NRIP1		transcription regulator		0	0.000579	GYS2,OPLAH,PDK2,SCD,SUOX,THRSP
pirinixic acid		chemical toxicant	Inhibited	-3.243	0.0006	ACOT2,ACOT4,ACSS2,CPT1A,Cyp2c40 (includes others),ELOVL5,FABP2,FADS2,G6PC,G6PD,KRT8,MGLL,Mup1 (includes others),PAICS,PEX11A,PSMA1,SCD,TALDO1	ACOX1,CEBPA,FOXO1,PPARA,PPARG,SREBF1,SREBF2,STAT5B,pirinixic acid
LIMA1	1.076	other			0.000722	KRT18,KRT8,VIM
CSTF2		other			0.000851	Ighg2a,Ighg2b
GNPTAB		enzyme			0.000851	GUSB,MANBA
L-triiodothyronine		chemical - endogenous mammalian		-0.57	0.000912	ABCD2,ACOT2,ARSA,CPT1A,CTSH,ETF1,G6PC,G6PD,ITGAV,KRT17,LYZ,Mup1 (includes others),OAT,PDK2,SCD,THRSP	Insulin,L-triiodothyronine,MLXIPL,MYC,NCOR1,PPARA,SREBF1,SREBF2,thyroid hormone receptor
PRL		cytokine		-0.903	0.00099	BCL2L1,CTSA,CTSH,IDE,ISG15,KRT5,KRT72,PDK2,PLSCR1,RPSA,SND1,TECR,VIM
Insulin		group		-1.339	0.00129	ACOT12,BCL2L1,FADS2,FTL,G6PC,G6PD,HNRNPK,IDE,PDK2,PLIN3,RPS16,RPS6,SCD,SKP2,SRSF3,THRSP	CEBPA,Insulin,L-triiodothyronine,MLXIPL,MYC,NCOR1,PPARA,PPARG,SREBF1,SREBF2,STAT5B,TP53,thyroid hormone receptor
carbohydrate		chemical - endogenous mammalian			0.00138	CPT1A,G6PC,SCD,THRSP	Insulin,MYC,PPARA,SREBF1,SREBF2,carbohydrate
HSPA5	1.05	enzyme		-1.506	0.00141	BCL2L1,CPT1A,G6PC,ISG15,SCD	HSPA5,Insulin,MYC,PPARA,SREBF1,SREBF2
IL15		cytokine		-1.495	0.00145	BCL2L1,COPB2,CPT1A,DARS2,DHRS4,EIF4E,FMO3,G6PD,GARS,HNRNPF,NAGA,PSAP,RPS6,SET,TALDO1,TKT,TXNRD1
GCK		kinase		-1.067	0.00158	CPT1A,G6PC,PDK2,SCD	GCK,Insulin,MYC,PPARA,SREBF1,SREBF2
MLXIPL		transcription regulator			0.00158	CPT1A,G6PC,SCD,THRSP
LARP1		translation regulator			0.00168	RPS20,RPS6
TR-RXR		complex			0.00168	G6PC,THRSP
cadmium		chemical toxicant		-0.447	0.00172	BCL2L1,G6PC,GPX4,HNRNPK,PECR,SERPINF1
EHHADH	-1.294	enzyme			0.00189	ACOT2,MGLL,PEX11A	CEBPA,EHHADH,PPARA,PPARG,SREBF1,STAT5B
PML		transcription regulator		1.744	0.00198	CPT1A,FTL,LYZ,PRDX1,SCD,TXN2,TXNRD1,VIM
VHL		transcription regulator		1.039	0.00208	BCL2L1,EIF5,FTL,MAVS,RPS6,SEC61G,SKP2,VIM
PRKAG3		other			0.00217	FTL,PLIN3,RPL12,RPL13A,RPL22,RPL5,Rps3a1,SLC7A2,THRSP
DYSF		other			0.00225	ACOT9,CTSH,ETF1,FTL,LYZ,PSAP
Srebp		group			0.0023	ABCD2,ACSS2,G6PD
TRAP1	1.152	enzyme		0	0.00253	EARS2,GARS,MAVS,TXN2
ELL2		transcription regulator			0.00277	Ighg2a,Ighg2b
RAB7A	-1.157	enzyme			0.00277	RPS6,VIM
RAD51C		enzyme			0.00277	KRT18,KRT8
SIRT6		enzyme			0.00278	G6PC,RPL23,RPL6,RPS15A,SCD	MYC,SIRT6,TP53
methotrexate		chemical drug	Inhibited	-2.53	0.00314	ACSS2,AGPAT3,ASS1,C8A,Ces1b/Ces1c,CPT1A,PCYT1A,PECR,PEX7,PRDX1,SCD
HSP90B1	-1.011	other	Inhibited	-2.236	0.00323	RPL12,RPL27A,RPL30,RPLP2,RPS20
XBP1		transcription regulator	Inhibited	-2.538	0.00324	COPB1,COPB2,MOGS,PCYT1A,Rrbp1,SCD,SEC61G,SEC63,STARD5,TRAM1
MDM4		enzyme			0.00327	KRT5,KRT8,VIM
FOXO1		transcription regulator		-0.259	0.0033	AGXT,CDK5RAP3,CKMT2,ELOVL5,FABP2,G6PC,HPD,ITGAV,MAVS,MRPL45,MRPL47,MRPL55,PLSCR1,PRCP,SCD,TKT	CEBPA,FOXO1,PPARA,PPARG
ONECUT1		transcription regulator			0.00333	ARL1,COPB2,DHRS4,G6PC,GLA,GUF1,ITGAV,NUTF2,OAT,PEX6,PSMA1,SCD
cisplatin		chemical drug		-0.024	0.00361	ANKFY1,ANPEP,BCL2L1,CPT1A,FAM210B,FDXR,G6PC,G6PD,HAO2,LYZ,OAT,PEX6,PRG2,PSMA1,RPL13A,RPS16,RPS27L,RPS5,RPS9,SCO2,SLC25A4,Tpm1,VIM,YBX1	MYC,TP53,cisplatin
MED13		transcription regulator			0.00381	G6PC,SCD,THRSP,TKT
decitabine		chemical drug		-0.445	0.00388	COPA,EEF1A1,FDXR,GLB1,ISG15,ITGAV,KRT18,KRT8,RPL11,RPL26,RPL4,RPL9,RPS13,RPS25,RPS6,Tpm1,VIM,YKT6	MYC,TP53,decitabine
CREB1		transcription regulator		-1.362	0.00399	AKAP1,ARG1,BCL2L1,CPT1A,CTNNA2,FABP2,G6PC,GAA,GLA,OXNAD1,PDXK,PITPNB,PRCP,SCD,SEC63,SYNJ2,Tpm4,TPT1,VIM
SPP1		cytokine		-0.141	0.004	ARG1,BCL2L1,EPDR1,GPX4,ITGAV,KRT18,SELENOW,SERPINF1,VIM	IL4,NFKBIA,SPP1
CSRP3		other			0.00411	KRT18,KRT8
GNRH2		other			0.00411	RPLP2,RPSA
GPAM	-1.09	enzyme			0.00411	G6PC,SCD
GSI34		chemical reagent			0.00411	BCL2L1,RPS6
HMG20A		transcription regulator			0.00411	CXADR,KRT18
Muc4		other			0.00411	BCL2L1,LYZ
OBP2B		transporter			0.00411	CPT1A,SCD
etretinate		chemical drug			0.00411	KRT1,KRT18
lestaurtinib		chemical drug			0.00411	BCL2L1,LYZ
taspoglutide		biologic drug			0.00411	CPT1A,FABP2
CEBPA		transcription regulator		-0.326	0.00447	ANPEP,ARG1,ASS1,BHMT,CPT1A,CREG1,EIF4E,G6PC,GGH,ISG15,KRT17,Mup1 (includes others),SCD,SERPINF1,SMPDL3A,TANK	CEBPA,FOXO1,PPARA,PPARG
NCOR1		transcription regulator			0.00455	AKAP1,G6PC,LYZ,OXNAD1,SERPINF1,THRSP
PRKAA		group		1.146	0.00503	CPT1A,G6PC,VIM,YBX1	MYC,PRKAA,TP53
DOT1L		phosphatase			0.00513	RPLP0,RPS2,RPS23
KHDRBS1		transcription regulator			0.0057	BCL2L1,SRSF1
miR-338-3p (miRNAs w/seed CCAGCAU)		mature microrna			0.0057	Tpm1,VIM
triolein		chemical drug			0.0057	FADS2,THRSP
H2AFX		transcription regulator			0.00587	EPDR1,RPL10A,RPL13
SRSF2	-1.071	transcription regulator			0.00597	Nnt,SRSF1,SRSF6,VIM
bezafibrate		chemical drug	Inhibited	-2.066	0.0062	ACOT2,ACOT4,FABP2,MGLL,PEX11A,SCD	ACOX1,CEBPA,FOXO1,PPARA,PPARG,SREBF1,STAT5B,bezafibrate
sulforafan		chemical drug		0.594	0.00653	BCL2L1,FTL,KRT17,TALDO1,TKT,TXNRD1,VIM	NFE2L2,PML,sulforafan
lactacystin		chemical - protease inhibitor		-1.414	0.00666	AK2,CPOX,EIF4E,FTL,KRT72,RPLP0,RPLP2,SNTB2,TXNRD1
fibric acid derivative		chemical drug			0.00667	ABCD2,FADS2,SCD	CEBPA,PPARA,PPARG,SREBF1,STAT5B,fibric acid derivative
10E,12Z-octadecadienoic acid		chemical - endogenous mammalian			0.00672	ABCD2,ACSS2,CPT1A,GLA,SCD	10E,12Z-octadecadienoic acid,CEBPA,PPARA,PPARG,SREBF1,STAT5B
bromobenzene		chemical toxicant		-1.342	0.00672	BHMT,FMO3,RPL22,RPL28,RPL35
sulindac sulfide		chemical drug		-0.128	0.00713	BCL2L1,ETNPPL,GARS,NUTF2,SPTBN1
arachidonic acid		chemical - endogenous mammalian		1.755	0.00717	FADS2,G6PD,SCD,SRSF3,THRSP,VIM	CEBPA,Insulin,MYC,PPARA,PPARG,SREBF1,SREBF2,STAT5B,arachidonic acid
3,5-L-diiodothyronine		chemical - endogenous mammalian			0.00751	CPT1A,SCD
ACLY	-1.308	enzyme			0.00751	ACSS2,SCD
DES		other			0.00751	KRT18,KRT8	DES,NFKBIA
HINT1	-1.084	enzyme			0.00751	ELOVL5,FADS2
TRIB1		kinase			0.00751	CPT1A,SCD	CEBPA,PPARG,TRIB1
oleoylethanolamide		chemical - endogenous mammalian			0.00751	BCL2L1,CPT1A	CEBPA,PPARA,PPARG,SREBF1,STAT5B,oleoylethanolamide
HSD17B4	-1.354	enzyme			0.00844	ACOT2,MGLL,PEX11A
amino acids		chemical - endogenous mammalian			0.00844	RPS20,RPS6,SLC7A2
PPARG		ligand-dependent nuclear receptor		-1.664	0.00892	ARG1,BCL2L1,CPT1A,FABP2,G6PC,HEBP1,KRT18,MANBA,MGLL,PEX11A,PEX6,RPSA,SCD,TKT,VIM,VNN1	CEBPA,FOXO1,PPARA,PPARG,SREBF1,STAT5B,bezafibrate
docosahexaenoic acid		chemical drug		0.436	0.00896	ABCD2,ACSS2,ARG1,BCL2L1,CPT1A,FADS2,G6PC,SCD	CEBPA,FOXO1,MLXIPL,PPARA,PPARG,SREBF1,SREBF2,STAT5B,docosahexaenoic acid
ELAVL1		other			0.00903	BCL2L1,CENPE,NCL,RACK1,RPL13,RPS6
NFKBIA		transcription regulator	Activated	2.703	0.00909	AK2,BCL2L1,CTSZ,GM2A,ISG15,ITGAV,KRT18,KRT8,PLD3,RPL27A,RPL8,RPS18,RPS2,RPSA,SPTBN1
irbesartan		chemical drug			0.00943	HRAS,ITGAV,SERPINF1
linolenic acid		chemical - endogenous mammalian			0.00943	ABCD2,G6PC,THRSP
thyroid hormone receptor		group			0.00943	ABCD2,CPT1A,KRT17	L-triiodothyronine,MLXIPL,NCOR1,thyroid hormone receptor
6-aminonicotinamide		chemical reagent			0.00955	G6PC,G6PD
GUSB	1.761	enzyme			0.00955	GLA,PITPNA
MSH2		enzyme			0.00955	Ighg2b,IGKC
Mup1 (includes others)	-2.046	other			0.00955	G6PC,SCD
RPS6KB2		kinase			0.00955	BCL2L1,ISG15
SPTAN1	-2.041	other			0.00955	ITGAV,SPTBN1
miR-142-3p (and other miRNAs w/seed GUAGUGU)		mature microrna			0.00955	BCL2L1,BCLAF1
STAT5B		transcription regulator		-1.406	0.00978	ABCD2,ACOT4,BCL2L1,CKMT2,HAO2,Mup1 (includes others),RPL5,SCD,TANK,THRSP,VNN1	CEBPA,PPARA,PPARG,SREBF1,STAT5B
IL4		cytokine		-0.806	0.00996	ACOT9,AK2,ARG1,ARSB,ASS1,BCL2L1,COL6A2,CPOX,CTSC,DARS2,GPX4,IDE,Ighg2b,ISG15,ITGAV,KRT1,NCL,PLSCR1,RAB5A,RPS6,Rrbp1,SLC7A2,SPTBN1,VIM,VPS35	IL4,NFKBIA,SPP1
Il3		cytokine			0.00997	ANPEP,BCL2L1,HRAS,LYZ,SNAP23	HRAS,Il3,NFKBIA,TP53
p70 S6k		group			0.0105	EEF1A1,SCD,VIM
ESR1		ligand-dependent nuclear receptor		-1.264	0.011	AKAP1,ANO10,AP3B1,ASS1,BCL2L1,BCLAF1,CENPE,COPA,CTSC,CXADR,G6PD,GLB1,GM2A,HEBP1,KCNMA1,Krt10,KRT13,MINOS1,OS9,PTTG1IP,RALA,SCD,SEC63,SKP2,SLC25A4,SLC7A2,SNAP23,SPTAN1,SPTBN1,TMEM97,TRAM1,VIM,VPS35,YKT6
SFN		other			0.0116	KRT18,KRT8,VIM
sterol		chemical - endogenous mammalian			0.0116	ABCD2,ACSS2,PCYT1A
DMD	1.231	other			0.0118	BGN,CKMT2,EEF1A1,KCNMA1,KRT18,LYZ,Mup1 (includes others),STARD10,VIM
LAMTOR5		other			0.0118	EIF4E,SKP2
PRKCH	-1.044	kinase			0.0118	KRT1,KRT5
RBPJL		transcription regulator			0.0118	AMY2A,CELA1
S100P		other			0.0118	KRT18,KRT8
SIK1/SIK1B		kinase			0.0118	SCD,THRSP
THOC5		other			0.0118	COX20,CPOX
sphingomyelin		chemical - endogenous mammalian			0.0118	ELOVL5,SCD
doxorubicin		chemical drug		0.765	0.0121	BCL2L1,DDX1,EEF1A1,GLB1,KRT18,KRT5,KRT8,MVP,PRDX1,PSAP,SLC25A4,Tpm1,VIM,YBX1
HOXA10		transcription regulator	Activated	2.121	0.0123	EIF3A,HDLBP,Ighg2b,KRT18,LYZ,RPL37A,SCD,THRSP
CDK9		kinase			0.0124	G6PD,NCL,SRSF6,VIM
TGFB1		growth factor		-0.863	0.0127	ANPEP,ARG1,ASS1,BCL2L1,BGN,CENPE,COL6A2,CPQ,CTSC,CTSH,CXADR,DDB1,EEF1A1,FDXR,FTL,GARS,GUSB,HEBP1,Ighg2b,ITGAV,KRT17,KRT18,KRT8,MAN2B2,MIA3,MTRR,PDK2,PDXK,PLSCR1,PPT1,RACK1,SCD,SERPINF1,SLC25A4,SLC26A11,SNTB2,SRSF3,SRSF6,Tpm1,Tpm4,TXNRD1,VIM,YBX1
ELOVL5	-1.527	enzyme			0.0128	FADS2,G6PC,SCD
troglitazone		chemical drug		-0.81	0.013	ABCD2,ACOT2,AK2,BCL2L1,EIF5,FADS2,KRT13,MRPL47,PEX11A,SCD,SKP2,TALDO1,THRSP
SCAP		other	Inhibited	-2	0.0135	ACSS2,FADS2,SCD,THRSP,TMEM97
CDK5		kinase			0.014	GLB1,KCNMA1,RALA
Focal adhesion kinase		group			0.014	KRT18,KRT8,SKP2
Adaptor protein 2		complex			0.0143	AGXT,RPSA
MAFF		transcription regulator			0.0143	MOGS,TXNRD1
cardiotoxin		chemical - other			0.0147	BGN,COL6A2,G6PD,GM2A,RPSA,SNRPD1,TXNRD1
oleic acid		chemical - endogenous mammalian		0.475	0.0148	ARG1,FABP2,G6PC,PLIN3,SCD,THRSP
BIRC5		other			0.015	BCL2L1,BGN,LYZ,VIM
SRSF1	-1.548	other			0.0153	SRSF1,SRSF6,VIM
TG		other			0.0153	ABCD2,CPT1A,THRSP
nicotinic acid		chemical - endogenous mammalian			0.0153	ELOVL5,G6PD,TECR
selenium		chemical drug			0.0153	GPX4,SELENOW,TXNRD1
MAP4K4		kinase	Activated	2.433	0.0154	AGPAT3,DHRS4,MGLL,PEX11A,PEX19,SCD
HIST1H1T		other		1.342	0.0155	BHMT,CCDC58,CPOX,MANBA,PPT2
Hist1h1a		other		1.342	0.0155	BHMT,CCDC58,CPOX,MANBA,PPT2
diethylnitrosamine		chemical toxicant		-0.447	0.0155	KRT8,Mup1 (includes others),OAT,PLSCR1,Rpl36
Pln		other			0.0159	HRAS,RACK1,RALA,VIM
ESR2		ligand-dependent nuclear receptor		0.495	0.016	AKAP1,ANPEP,BCL2L1,GLB1,GM2A,HEBP1,KRT17,KRT6B,KRT8,RALA,SKP2,SLC25A4,SPTAN1,THRSP
TNF		cytokine		1.052	0.0164	ABCD2,AK2,ANPEP,ARG1,ASS1,BCL2L1,BGN,CNP,CPT1A,CTSC,CTSZ,GM2A,GPX4,GUSB,IDE,IGKC,ISG15,ITGAV,KRT18,KRT6B,KRT8,MVP,PCYT1A,PEX11A,PLD3,PLSCR1,RPS13,RPS3,RPSA,SCD,SCO2,SERPINF1,SGPL1,SLC14A2,SLC7A2,SMPDL3A,SND1,TALDO1,THRSP,TPT1,TXN2,TXNRD1,VIM
Alpha catenin		group		0.896	0.0166	BCL2L1,BGN,COL6A2,KRT6B,LYZ,VIM
Gm15807/Hmgn5		other			0.0167	HNRNPK,Mup1 (includes others),TANK
CDN1163		chemical reagent			0.0169	G6PC,SCD
DL-fructose		chemical - endogenous mammalian			0.0169	G6PC,SCD
IL16		cytokine			0.0169	BCL2L1,SKP2
NELFB		other			0.0169	RPLP0,RPS3
NRG4		growth factor			0.0169	ELOVL5,SCD
PAX4		transcription regulator			0.0169	BCL2L1,VIM
PIK3R2		kinase			0.0169	BCL2L1,ISG15
(+)-terpinen-4-ol		chemical reagent			0.017	BCL2L1
(-)-gossypol-enriched cottonseed oil		chemical reagent			0.017	BCL2L1
1-benzyl-2-phenylbenzimidazole		chemical reagent			0.017	BCL2L1
2,2-dichloroacetophenone		chemical reagent			0.017	BCL2L1
3-aminoisobutanoate		chemical - endogenous mammalian			0.017	CPT1A
4-(3',5'-dimethoxybenzyloxy)-6-methoxyquinolin-2(1H)-one		chemical reagent			0.017	BCL2L1
4-methoxyhonokiol		chemical - endogenous non-mammalian			0.017	BCL2L1
6-azidomethyl-1-hydroxy-3,8-dimethoxy-9,10-anthraquinone		chemical reagent			0.017	BCL2L1
7,8-dihydroxy-4-methylcoumarin		chemical reagent			0.017	BCL2L1
8-hydrocalamenene		chemical reagent			0.017	BCL2L1
AB1		chemical reagent			0.017	BCL2L1
ANK2		other			0.017	SPTBN1
AUH-6-96		chemical reagent			0.017	BCL2L1
BAIAP3		other			0.017	HRAS
BCYRN1		other			0.017	BCL2L1
CENPF		other			0.017	CENPE
CLPTM1L		other			0.017	BCL2L1
CPEB4		other			0.017	BCL2L1
CPS49		chemical reagent			0.017	BCL2L1
CPSF1		other			0.017	Ighg2a
CSTF1		other			0.017	Ighg2a
EAPB0203		chemical reagent			0.017	BCL2L1
ERMN		other			0.017	CNP
H9 extract		chemical reagent			0.017	BCL2L1
HO-3867		chemical reagent			0.017	BCL2L1
IBTK		other			0.017	BCL2L1
Il2 beta gamma receptor		complex			0.017	BCL2L1
JOT01006		chemical reagent			0.017	BCL2L1
MAPK substrate-4		chemical reagent			0.017	BCL2L1
MCM8		enzyme			0.017	BCL2L1
MI-319		chemical reagent			0.017	BCL2L1
MPT0B169		chemical reagent			0.017	BCL2L1
MPT0G009		chemical reagent			0.017	BCL2L1
N-[3-(trifluoromethyl)phenyl]retinamide		chemical reagent			0.017	BCL2L1
NEK2		kinase			0.017	BCL2L1
PJA1		enzyme			0.017	SPTBN1
PTPN13		phosphatase			0.017	BCL2L1
RAB14	-1.313	enzyme			0.017	SLC14A2
RBM25		other			0.017	BCL2L1
REG1A		growth factor			0.017	BCL2L1
REG4		other			0.017	BCL2L1
RNPS1		other			0.017	BCL2L1
RRAS	-1.01	enzyme			0.017	BCL2L1
Rap		group			0.017	MVP
SAIT301		biologic drug			0.017	BCL2L1
SPI-112Me		chemical reagent			0.017	BCL2L1
TCEAL7		transcription regulator			0.017	BCL2L1
TL-77		chemical reagent			0.017	BCL2L1
TRAPPC9		other			0.017	BCL2L1
TTPA	-1.295	transporter			0.017	IDE
Timp		group			0.017	BCL2L1
VTI1B		transporter			0.017	STX8
WJ9708012		chemical reagent			0.017	BCL2L1
acetylapoaranotin		chemical reagent			0.017	BCL2L1
acetylaranotin		chemical reagent			0.017	BCL2L1
aloin		chemical reagent			0.017	BCL2L1
alpinetin		chemical reagent			0.017	BCL2L1
atractylenolide I		chemical reagent			0.017	BCL2L1
barasertib		chemical drug			0.017	BCL2L1
bicarbonate		chemical - endogenous mammalian			0.017	SLC14A2
bisindole-linked pyrrolo[2,1-c][1,4]benzodiazepine 5b		chemical reagent			0.017	BCL2L1
bornyl caffeate		chemical reagent			0.017	BCL2L1
cardiotoxin III		chemical reagent			0.017	BCL2L1
deoxyapoaranotin		chemical reagent			0.017	BCL2L1
depsipeptide		chemical - other			0.017	BCL2L1
dianthus chinensis l. ethanol extract		chemical reagent			0.017	BCL2L1
farnesiferol C		chemical reagent			0.017	BCL2L1
flacourtia indica methanol extract		chemical reagent			0.017	BCL2L1
fungal taxol		chemical reagent			0.017	BCL2L1
galiximab		biologic drug			0.017	BCL2L1
gelam honey		chemical reagent			0.017	BCL2L1
gypenoside		chemical reagent			0.017	BCL2L1
hederagenin		chemical reagent			0.017	BCL2L1
heteronemin		chemical reagent			0.017	BCL2L1
hydroxyaminoindan		chemical reagent			0.017	BCL2L1
icariin		chemical drug			0.017	BCL2L1
iodine-131		chemical drug			0.017	BCL2L1
korean red ginseng extract		chemical reagent			0.017	BCL2L1
let-7c mimic		chemical reagent			0.017	BCL2L1
liriope platyphylla root part extract		chemical reagent			0.017	BCL2L1
luffa echinata roxb fruit extract		chemical reagent			0.017	BCL2L1
mansonone E		chemical reagent			0.017	BCL2L1
melamine		chemical reagent			0.017	BCL2L1
miR-135a mimic		chemical reagent			0.017	BCL2L1
miR-450a-5p (and other miRNAs w/seed UUUGCGA)		mature microrna			0.017	HNRNPK
miR-4651 (and other miRNAs w/seed GGGGUGG)		mature microrna			0.017	BCL2L1
mir-216		microrna			0.017	YBX1
mir-491		microrna			0.017	BCL2L1
morusin		chemical - endogenous non-mammalian			0.017	BCL2L1
nitidine		chemical reagent			0.017	BCL2L1
norcantharidin		chemical reagent			0.017	BCL2L1
oxythiamine		chemical reagent			0.017	G6PC
p-cuminaldehyde		chemical - endogenous non-mammalian			0.017	BCL2L1
pepleomycin		chemical drug			0.017	BCL2L1
persea declinata (bl.) kosterm bark methanolic crude extract		chemical reagent			0.017	BCL2L1
picolog		chemical reagent			0.017	BCL2L1
pien tze huang methanol extract		chemical reagent			0.017	BCL2L1
procyanidin B2-3'-O-gallate		chemical reagent			0.017	BCL2L1
procyanidin B2-3,3'-di-O-gallate		chemical reagent			0.017	BCL2L1
pseudolaric acid B		chemical reagent			0.017	BCL2L1
raddeanin A		chemical reagent			0.017	BCL2L1
rocaglaol		chemical reagent			0.017	BCL2L1
sargramostim		biologic drug			0.017	BCL2L1
silmitasertib		chemical drug			0.017	BCL2L1
solamargine		chemical drug			0.017	BCL2L1
subditine		chemical reagent			0.017	BCL2L1
sun ginseng extract		chemical reagent			0.017	BCL2L1
tetraacetyl-phytosphingosine		chemical reagent			0.017	BCL2L1
tetracaine		chemical drug			0.017	BCL2L1
tinostamustine		chemical drug			0.017	BCL2L1
uncarinic acid E		chemical reagent			0.017	BCL2L1
yessotoxin		chemical - endogenous non-mammalian			0.017	AKAP1
zinc-citrate		chemical reagent			0.017	BCL2L1
zuo-jin-wan		chemical drug			0.017	BCL2L1
FGFR1		kinase		-0.447	0.0178	DDX25,EEF1A1,EIF4E,RPS6,VIM
MAX		transcription regulator			0.0178	FADS2,G6PC,NCL,SCPEP1,YBX1
IRF4		transcription regulator		0.816	0.0185	ARG1,DNASE2,ISG15,PLSCR1,PSMA1,RPL6,YBX1
RORC		ligand-dependent nuclear receptor			0.0185	ABCD2,ACOT2,BHMT,CKMT2,G6PC,Mup1 (includes others),SLC7A2
ZFHX3		transcription regulator			0.0186	HRAS,Rplp1 (includes others),RPLP2,RPS12,RPS28
mir-122		microrna		1.362	0.0186	G6PD,NUTF2,PLIN3,SEPT2,VIM
amiloride		chemical drug			0.0198	BCL2L1,SRSF3
clofibric acid		chemical drug			0.0198	FABP2,SCD
SLC13A1		transporter		0.447	0.0202	COPB2,FABP2,RPL8,Rplp1 (includes others),SCD
3-deazaneplanocin		chemical drug		-0.068	0.021	BCL2L1,KRT17,MVP,SLC7A2
NR1I2		ligand-dependent nuclear receptor		1.8	0.0215	BHMT,CPOX,CPT1A,GUSB,Mup1 (includes others),Nat8f2,SCD
STK11		kinase		1	0.0218	ACP6,AK2,ASS1,EIF3A,RPS6,SARDH,STARD10,TALDO1,TKT,TXNRD1
UCP1		transporter		-1.89	0.0221	ACOT2,EEF1A1,G6PD,GARS,GPX4,SND1,TXN2
APOA4		transporter			0.0228	FABP2,G6PC
GADD45B		other			0.0228	BCL2L1,BGN
ibrutinib		chemical drug			0.0228	BCL2L1,RPS6
PLN		transporter			0.0233	HRAS,RACK1,RALA,VIM
WNT1		cytokine			0.0236	DDX25,EEF1A1,EIF4E,KRT5,KRT6B,RPS6
EFNA1		other			0.0245	HRAS,KRT1,KRT13,KRT18
xanthohumol		chemical - endogenous non-mammalian			0.0246	BCL2L1,CKMT2,SCD
MBD2	-1.051	transcription regulator			0.0258	AMY2A,ASS1,G6PD,OAT
INSIG2		other			0.026	G6PD,SCD
PNN		other			0.026	BCL2L1,SRSF1
ZNF148		transcription regulator			0.026	BCL2L1,VIM
CP-55940		chemical reagent			0.0264	BCL2L1,RPL13A,RPS9
FOXA3		transcription regulator			0.0264	CPT1A,Ear2 (includes others),G6PC
LRP6		transmembrane receptor			0.0264	G6PC,KRT18,VIM
clofibrate		chemical drug	Inhibited	-2.183	0.0268	ACOT2,ACOT4,CPT1A,PEX11A,SCD
CEBPB		transcription regulator	Inhibited	-2.407	0.0275	ARG1,BCL2L1,BHMT,CPT1A,CTSC,FTL,G6PC,IGKC,KRT18,KRT6B,PRG2,SCD,VIM
D-glucose		chemical - endogenous mammalian		-0.19	0.0276	ASS1,BCL2L1,FABP2,G6PC,G6PD,HNRNPK,NEU1,OAT,PLIN3,RTN3,SCD,SLC25A4,SRSF1,TALDO1,THRSP,TKT,Tpm1,TXNRD1
CCND1		transcription regulator	Activated	2.534	0.028	BCLAF1,CTNNA2,EIF5,ITGAV,KRT1,PCYT1A,RPL10,RPL13,RPL27A,RPS6,TALDO1
CARM1		transcription regulator			0.0282	FTL,G6PC,KRT1
Cdc42	1.069	enzyme			0.0282	CTSA,CTSH,CTSZ
PLAU		peptidase			0.0284	ARG1,BCL2L1,ITGAV,VIM
KDM1A		enzyme		0.447	0.0289	CXADR,KRT18,KRT8,NCL,SCD
N-cor		group		1.982	0.0289	ELOVL5,FADS2,G6PD,HEBP1,SCD
CSF2RB		transmembrane receptor			0.0294	BCL2L1,SNAP23
MEL T1		chemical - kinase inhibitor			0.0294	PRDX1,PSMA1
STIM1	-1.226	ion channel			0.0294	BCL2L1,PRDX1
acadesine		chemical drug			0.0294	OAT,THRSP
tetrandrine		chemical drug			0.0294	BCL2L1,YBX1
halofuginone		chemical drug			0.0296	BGN,CPQ,PPT1,PRELP,SCPEP1,SELENOW
INSIG1		other		1.41	0.03	ACSS2,FADS2,G6PD,SCD,VNN1
PLAUR		transmembrane receptor			0.0301	BCL2L1,ITGAV,VIM
miR-199a-5p (and other miRNAs w/seed CCAGUGU)		mature microrna		1.964	0.0311	BGN,ISG15,KRT17,SET
EIF4E	-1.633	translation regulator		0.084	0.0314	BCL2L1,BCLAF1,DGUOK,HRAS,SKP2,ZPR1
palmitic acid		chemical - endogenous mammalian		-1.937	0.0316	BCL2L1,EEF1A1,FABP2,G6PC,G6PD,IDE,SCD,SLC25A4
rosiglitazone		chemical drug	Inhibited	-2.937	0.0323	ACSS2,ARG1,CPT1A,GYS2,KRT18,MGLL,Mup1 (includes others),PECR,PEX11A,PLA2G15,SCD,SERPINF1,SKP2
ETS2		transcription regulator			0.0326	ANPEP,BCL2L1,KRT18,LYZ
gemfibrozil		chemical drug		-0.898	0.0326	ACOT2,CNP,CPT1A,SCD
CSNK2A1		kinase			0.033	BCL2L1,VIM
DNAJB6		transcription regulator			0.033	KRT18,VIM
GAB1		kinase			0.033	ARG1,HRAS
GPI	-1.136	enzyme			0.033	SKP2,VIM
PPP1R1B		phosphatase			0.033	BCL2L1,SRSF3
QKI		other			0.033	HNRNPF,VIM
dactolisib		chemical drug			0.033	RPS6,SKP2
2-nitrotoluene		chemical toxicant			0.0336	FHIT
3-(methylthio)propionic acid		chemical - endogenous mammalian			0.0336	G6PC
3-hydroxyflavone		chemical - endogenous non-mammalian			0.0336	BCL2L1
3830403N18Rik/Xlr		other			0.0336	BCL2L1
4-nitrophenol		chemical - endogenous mammalian			0.0336	BCL2L1
7alpha-hydroxycholesterol		chemical - endogenous mammalian			0.0336	G6PC
ADAMTS5		peptidase			0.0336	BGN
ALKBH3		enzyme			0.0336	BCL2L1
C1QL3		other			0.0336	G6PC
CARHSP1		transcription regulator			0.0336	G6PC
CCHCR1		other			0.0336	KRT17
CNBP		transcription regulator			0.0336	RPS6
CTSA	1.74	peptidase			0.0336	GLB1
E. coli 011:B4 lipopolysaccharide		chemical - endogenous non-mammalian			0.0336	BCL2L1
EIF4A3		enzyme			0.0336	BCL2L1
EIF4B		translation regulator			0.0336	ISG15
GSTA1		enzyme			0.0336	BCL2L1
Gm4836 (includes others)		other			0.0336	BCL2L1
IGK		other			0.0336	BCL2L1
ITPR3		ion channel			0.0336	G6PC
KU-60019		chemical - kinase inhibitor			0.0336	GLB1
NAGLU		enzyme			0.0336	LYZ
NEU2		enzyme			0.0336	BCL2L1
Npm		group			0.0336	RPL3
PIN4		enzyme			0.0336	G6PC
POLDIP3		other			0.0336	ISG15
PRSS3		peptidase			0.0336	PSAP
PTPRT		phosphatase			0.0336	BCL2L1
PYY		other			0.0336	FABP2
Prl3d1 (includes others)		other			0.0336	BCL2L1
RAMP3		transporter			0.0336	VIM
RFX4		transcription regulator			0.0336	RPL30
SAP18		transcription regulator			0.0336	BCL2L1
SD-1008		chemical - kinase inhibitor			0.0336	BCL2L1
SELENOH		other			0.0336	GLB1
SEPT5		enzyme			0.0336	SEPT2
SETBP1		transcription regulator			0.0336	SET
SLC4A5		transporter			0.0336	SPTBN1
SYCP3		other			0.0336	BCL2L1
TAT		enzyme			0.0336	GLB1
TIAM2		enzyme			0.0336	VIM
TJP2		kinase			0.0336	BCL2L1
UBE2W		enzyme			0.0336	Krt10
UFL1	-1.476	enzyme			0.0336	CDK5RAP3
VPS26B		transporter			0.0336	VPS35
Zingiber officiale ginger extract		chemical drug			0.0336	BCL2L1
caseamembrin C		chemical reagent			0.0336	BCL2L1
cerebroside 3-sulfate		chemical - endogenous mammalian			0.0336	ITGAV
dacetuzumab		biologic drug			0.0336	BCL2L1
dibucaine		chemical drug			0.0336	BCL2L1
fedratinib		chemical drug			0.0336	BCL2L1
fructose-2,6-diphosphate		chemical - endogenous mammalian			0.0336	G6PC
ginkgetin		chemical - endogenous non-mammalian			0.0336	BCL2L1
hexanoic acid		chemical - endogenous mammalian			0.0336	G6PC
iopanoic acid		chemical drug			0.0336	G6PD
malonic acid		chemical - endogenous mammalian			0.0336	BCL2L1
mefenamic acid		chemical drug			0.0336	BCL2L1
metacept-1		chemical reagent			0.0336	BCL2L1
miR-489-3p (miRNAs w/seed UGACAUC)		mature microrna			0.0336	PEX7
phytic acid		chemical - endogenous non-mammalian			0.0336	BCL2L1
pinitol		chemical drug			0.0336	BCL2L1
thiamine		chemical - endogenous mammalian			0.0336	TKT
GCG		other		-1.969	0.034	BCL2L1,CPT1A,ETNPPL,G6PC
D-fructose		chemical - endogenous mammalian			0.0341	SCD,TKT,TXN2
EFNA4		kinase			0.0341	KRT1,KRT13,KRT18
Laminin (complex)		complex			0.0341	RPSA,SKP2,VIM
roscovitine		chemical drug			0.0341	PCYT1A,RALA,SKP2
NR4A1		ligand-dependent nuclear receptor			0.0343	COL6A2,G6PC,KRT18,KRT8,SCD,STARD10,TRIM41
4-hydroxytamoxifen		chemical drug		0.342	0.0352	AKAP1,BCL2L1,GM2A,HEBP1,KRT13,SLC25A4,TMEM97
POR	-1.268	enzyme			0.0352	CPT1A,ELOVL5,FABP2,FADS2,SCD,TMEM97,VNN1
ABCB6	1.351	transporter			0.0363	CPOX,Cyp2c40 (includes others),SLC25A51
EFNA3		kinase			0.0363	KRT1,KRT13,KRT18
JAK		group			0.0363	BCL2L1,ISG15,VIM
AGPAT2	-1.462	enzyme			0.0367	PLD3,SCD
AKR1B1		enzyme			0.0367	BCL2L1,CPT1A
FMO3	-1.604	enzyme			0.0367	G6PC,SCD
ITGA6		transmembrane receptor			0.0367	BCL2L1,RPSA
TAF1		transcription regulator			0.0367	RPL31,RPS10
dasatinib		chemical drug			0.0367	BCL2L1,RPS6
fenofibrate		chemical drug	Inhibited	-2.752	0.0369	ABCD2,ACOT2,CPT1A,FABP2,FADS2,G6PC,MGLL,PAICS,SCD
fatty acid		chemical - endogenous mammalian		0	0.037	FADS2,G6PC,SCD,THRSP,VNN1
propylthiouracil		chemical drug			0.037	CELA1,FADS2,FMO3,G6PD,THRSP
FASN	1.031	enzyme			0.0384	SCD,SKP2,VIM
cholic acid		chemical - endogenous mammalian		-0.83	0.0387	G6PC,KRT18,KRT8,MVP
IL13		cytokine		-1.336	0.0387	ARG1,BCL2L1,COL6A2,CTSC,CTSH,DNASE2,FADS2,G6PD,GPX4,SERPINF1,SLC7A2,VNN1
MAPK1		kinase		-0.353	0.0401	ANPEP,ARSB,CTNNA2,ISG15,ITGAV,KRT17,MVP,PLSCR1,PPT2,SUOX,VIM
streptozocin		chemical drug		-0.803	0.0405	BCL2L1,CPT1A,G6PC,PDK2,SCD,SLC14A2,SLC7A2,VIM
MST1R		kinase			0.0406	ARG1,VIM
MUC4		other			0.0406	KRT18,VIM
EGFR	1.072	kinase		-1.225	0.0406	ARG1,BCL2L1,COL6A2,EIF4E,HNRNPK,KIAA0391,KRT17,NCL,NUTF2,SKP2,SRSF1,VIM
EFNA5		kinase			0.0407	KRT1,KRT13,KRT18
PKD1		ion channel		-0.378	0.0418	ACOT2,EIF3A,G6PC,HGD,KRT18,RAB9B,SYNJ2
NOS2		enzyme		0.128	0.0428	CTSC,G6PC,G6PD,ISG15,KRT13,PLSCR1,TKT
vincristine		chemical drug			0.043	BCL2L1,HNRNPF,HNRNPK
PLG	-1.226	peptidase	Inhibited	-2	0.0437	ARG1,CYP2S1,RAB5A,RALA
MLX		transcription regulator			0.0446	SCD,THRSP
RACK1	-1.736	enzyme			0.0446	BCL2L1,ISG15
imatinib		chemical drug		0.658	0.0449	ATP5S,BCL2L1,COPB2,HRAS,IGKC,NCL,RAB4A,SKP2,SRSF1,SRSF6
miR-1-3p (and other miRNAs w/seed GGAAUGU)		mature microrna		0.324	0.0459	ANPEP,AP3B1,CPOX,CTSC,G6PD,Mup1 (includes others),OAT
CD3		complex	Inhibited	-2.825	0.0462	BCL2L1,BZW1,COPB2,DHRS4,EIF4E,FMO3,FTL,G6PD,HNRNPF,NAGA,NCL,PSAP,RPL30,RPL35A,RPL6,SRSF1,TXNRD1
cocaine		chemical drug		-1.912	0.047	CPT1A,DDB1,G6PC,PDXK,PITPNA,PSAP,Tpm1
BTK		kinase			0.0478	BCL2L1,CTSA,ISG15,ITGAV,NCL
DDIT3		transcription regulator		0.625	0.0478	KRT6B,SKP2,SRSF1,SRSF6,VIM
n-3 fatty acids		chemical drug			0.0478	FADS2,MTRR,SCD
let-7a-5p (and other miRNAs w/seed GAGGUAG)		mature microrna		1.781	0.0478	BCL2L1,FADS2,MTRR,SCD,SNAP23,VIM
RORA		ligand-dependent nuclear receptor			0.0481	ABCD2,ACOT2,BHMT,CKMT2,G6PC,Mup1 (includes others),SCD
Aldose Reductase		group			0.0487	BCL2L1,G6PD
LGR5		transmembrane receptor			0.0487	BCL2L1,OAT
PD 153035		chemical drug			0.0487	BCL2L1,KRT13
SH2D1A		other			0.0487	Ighg2a,Ighg2b
SIRT1		transcription regulator		0.666	0.0496	BCL2L1,BCLAF1,CELA1,CPT1A,DDB1,EPDR1,ERMP1,G6PC,Ighg2a,RPL10A,RPL13
AMPK		complex	Activated	2.142	0.057	G6PC,OAT,THRSP,VIM,YBX1
eicosapentenoic acid		chemical drug		1.964	0.0714	BCL2L1,FADS2,G6PC,THRSP
KLF4		transcription regulator	Inhibited	-2.156	0.0751	ARG1,BCL2L1,CENPE,FABP2,KRT13,KRT17,TXNRD1,VIM
BRCA1		transcription regulator		1.958	0.0833	BCL2L1,FHIT,KRT17,KRT5,PLSCR1,VIM
testosterone		chemical - endogenous mammalian		-1.929	0.0855	ANPEP,BGN,GPX4,GUSB,HNRNPK,OAT,PSMA1,RALA,RPL21,TXNRD1
IGF1		growth factor		-1.772	0.116	ACSS2,ANPEP,BCL2L1,BGN,CNP,EIF4E,ITGAV,PDXK,SCD,SRSF3,THRSP,VIM
PTGS2		enzyme		1.901	0.152	BCL2L1,ITGAV,Krt10,RPS19,VNN1
SOX4		transcription regulator	Inhibited	-2.219	0.21	ACY3,IGKC,LYZ,Tpm4,VIM
trichostatin A		chemical drug	Inhibited	-2.075	0.267	ARG1,BCL2L1,CXADR,G6PD,KRT6B,OAT,PCYT1A,PRG2,RPL13,SGPL1,SRSF1,VIM,YKT6
VCAN		other		1.982	0.284	ASS1,GLB1,PRELP,Tpm1
Mek		group	Inhibited	-2.164	0.345	ANPEP,BCL2L1,RPL23,Tpm1,VIM
L-dopa		chemical - endogenous mammalian	Inhibited	-2.496	0.36	BCL2L1,CTSC,CTSZ,DPP7,FAM210B,FTL,GLB1,HRAS,Krt10,NPHP4,PAOX,PSAP,SKP2
EZH2		transcription regulator		1.976	0.4	EPDR1,FUCA1,KRT6B,PRG2,RPL10A,RPL13,SGPL1
NOTCH1		transcription regulator	Inhibited	-2.186	0.435	BCL2L1,G6PC,GAA,KRT8,OAT
E. coli B5 lipopolysaccharide		chemical - endogenous non-mammalian	Activated	2.236	0.455	BHMT,Cyp2c40 (includes others),EEF1A1,G6PC,Mup1 (includes others)
FGF2		growth factor	Inhibited	-2.132	0.531	ANPEP,BCL2L1,BGN,CNP,FRRS1,SCD,VIM
JUN		transcription regulator		-1.927	1	ITGAV,MOGS,PRDX1,SCD,VIM

## Sheet: Causal Networks
Master Regulator	Molecule Type	Expr Fold Change	Depth	Predicted Activation State	Activation z-score	p-value of overlap	Participating regulators	Target molecules in dataset	Causal network	Target-connected regulators	Relationships Between Master Regulators(Increases/Downstream)	Relationships Between Master Regulators(Decreases/Downstream)	Relationships Between Master Regulators(Affects/Downstream)	Relationships Between Master Regulators(Increases/Upstream)	Relationships Between Master Regulators(Decreases/Upstream)	Relationships Between Master Regulators(Affects/Upstream)	Relationships Between Master Regulators(Increases/Both)	Relationships Between Master Regulators(Decreases/Both)	Relationships Between Master Regulators(Affects/Both)
MYCN	transcription regulator		1	Inhibited	-6.532	1.43e-43	MYCN	ABCD2,BCL2L1,EEF1A1,NCL,RPL11,RPL12,RPL13,RPL13A,RPL17,RPL18A,RPL21,RPL22,RPL23,RPL24,RPL26,RPL27,RPL27A,RPL28,RPL3,RPL30,RPL31,RPL35,RPL35A,RPL37A,RPL38,RPL4,RPL5,RPL6,RPL7,RPL8,RPL9,RPLP0,RPLP2,RPS12,RPS13,RPS15,RPS16,RPS17,RPS19,RPS2,RPS20,RPS23,RPS24,RPS25,RPS26,RPS28,RPS3,RPS5,RPS6,RPS7,RPS8,RPS9,TMEM109,VIM	54 (1)	1	benzyloxycarbonyl-Leu-Leu-Leu aldehyde	2-deoxyglucose,KRAS,MYC		CCND1,Focal adhesion kinase,NACA,PTK2,TP53,Ubiquitin
RICTOR	other		1	Activated	6.062	2.27e-35	RICTOR	BCL2L1,ISG15,MRPL13,PSMA1,PSMD13,RPL10,RPL10A,RPL11,RPL12,RPL13A,RPL14,RPL17,RPL21,RPL22,RPL23,Rpl23a,RPL26,RPL28,RPL30,Rpl34 (includes others),RPL35A,RPL38,RPL4,RPL6,RPL7,RPL7A,RPL8,RPL9,RPLP0,Rplp1 (includes others),RPLP2,RPS10,RPS13,RPS15,RPS18,RPS19,RPS2,RPS23,RPS24,RPS26,RPS3,Rps3a1,RPS4Y1,RPS5,RPS6,RPS8,RPS9,RPSA	48 (1)	1	amino acids,dactolisib,ELOVL5,Insulin	sirolimus		GCK,OBP2B,PTGS2,RAC1,SREBF1,SREBF2	IRS2
sirolimus	chemical drug		1	Activated	5.528	4.56e-29	sirolimus	ARG1,BCL2L1,CREG1,DPP7,EEF1A1,EIF5,G6PD,GLA,ISG15,NCL,NEU1,PEX2,RACK1,RPL10,RPL10A,RPL13A,RPL18A,RPL21,RPL23,RPL27,RPL27A,RPL3,RPL30,RPL35,RPL37A,RPL38,RPL5,RPL7A,RPL8,RPLP0,RPS10,RPS12,RPS13,RPS15,RPS16,RPS17,RPS18,RPS19,RPS2,RPS20,RPS23,RPS24,RPS26,RPS3,RPS5,RPS6,RPS7,RPS8,RPS9,RPSA,SCD,SCPEP1,SNAP23,SRSF3,VIM	55 (1)	1				ATG13,Cdc42,Creb,D-glucose,hexanoic acid,IRS2,MAP3K5,MYC,NFKBIA,PML,TSC2	AMPK,arachidonic acid,ARHGDIB,CARHSP1,CCND1,CDKN1A,creatine kinase,CSNK2A1,DDIT3,EIF4B,FASN,FGF9,FMR1,Focal adhesion kinase,FOS,HLA-B,HSP90B1,HSPA5,IL16,Insulin,Ldh (complex),leucine,LGALS3,LILRB1,MAPK12,mir-451,POLDIP3,PTK2,putrescine,RAC1,RACK1,RICTOR,RPS6KB2,SREBF1,TFEB,TP53,XBP1,YY1
mir-132	microRNA		3	Inhibited	-4.63	2.58e-20	ADCY,Akt,AKT1,AMPK,Ap1,Calcineurin protein(s),CEBPB,Creb,CREB1,cyclic AMP,EIF4E,ESR1,FASN,FOXO1,HRAS,IKBKB,KRAS,MAP3K1,MAPK1,Mek,mir-132,MTOR,MYC,MYOD1,Nfat (family),NFE2L2,NFkB (complex),NFKBIA,PI3K (complex),PIK3C2B,Pkc(s),RAC1,RAF1,RALGDS,RAS,SRF,STAT3,STAT5A,STK11,TRPM8,TSC2	ACOT12,ACP6,ACSS2,ACY3,AGPAT3,AKAP1,ANO10,ANPEP,AP3B1,ARG1,ARSB,BCL2L1,BCLAF1,CDK5RAP3,CELA1,CENPE,Ces1b/Ces1c,CKMT2,CNP,COPA,COPB2,CPT1A,CREG1,CTNNA2,CTSH,DGUOK,DPP7,EEF1A1,EIF3A,EIF4E,EIF5,FABP2,FADS2,FHIT,FTL,G6PD,GAA,GLA,GPX4,GYS2,HRAS,IDE,IGKC,Igkv1-117,KCNMA1,KIAA0391,KRT1,KRT5,KRT6B,KRT8,MAN2B2,MAVS,MGLL,MINOS1,MRPL45,MRPL47,MRPL55,MTRR,NCL,NEU1,NLN,NUS1,OAT,OS9,PAICS,PDXK,PEX1,PEX11A,PEX1…	136 (41)	39	5-fluorouracil,AGT,cocaine,Creb,IGF1R,TP53			RAS	RASA1
policosanol	chemical drug		3	Activated	3.857	7.14e-19	26s Proteasome,Akt,AKT1,ERK,ERK1/2,FASN,FOXO1,HIF1A,HMGCR,HSF1,Jnk,MTOR,MYC,NR3C1,policosanol,PPARGC1A,PRKAA,RAF1,RAS,SIRT1,SREBF1,STIM1,TP53,TSC1,TSC2	ACOT12,ACSS2,AK2,AKAP1,ANPEP,ARG1,ASS1,ATP5S,BCLAF1,BGN,BHMT,CDK5RAP3,CENPE,Ces1b/Ces1c,CNP,COL6A2,COPB1,CPOX,CPT1A,CREG1,CTSA,CTSH,CXADR,DPP7,EEF1A1,EIF3A,EIF4E,ERMP1,FABP2,FDXR,FHIT,G6PC,G6PD,GLA,GM2A,HDLBP,HIST2H2AC,Ighg2a,KCNMA1,KIAA0391,KRT17,KRT18,KRT6B,KRT8,LYZ,MAVS,MGLL,MRPL45,MRPL47,MRPL55,MVP,NCL,NEU1,PAICS,Pcmt1,PCYT1A,PEX11A,PEX19,PLSCR1,PRDX1,PRELP,PSAP,PSMA1,RNASET2,RPL11,RPL12,RPL1…	113 (25)	23				PRKAA
TNK1	kinase		3	Activated	3.536	8.77e-19	Akt,AKT1,BCL2L1,Calcineurin protein(s),CDK2,CEBPB,CREB1,EIF2S1,EIF4E,ESR1,HRAS,Ifn,IFNA2,IKBKB,IRF3,JUN,KRAS,MAP3K1,MAPK1,Mek,MTOR,MYC,Nfat (family),NFKBIA,NOS2,P38 MAPK,PI3K (complex),PIK3C2B,PIK3CD,Pkc(s),PRKAA,RAF1,RALGDS,RAS,RELA,SLC29A1,SMAD3,SRF,STAT1,STAT3,STAT5A,TNK1,TSC2	ACOT12,ACSS2,AKAP1,ANO10,ANPEP,AP3B1,ARG1,ARSB,ASS1,BCL2L1,BCLAF1,CENPE,Ces1b/Ces1c,CKMT2,CNP,COL6A2,COPA,COPB2,CREG1,CTNNA2,CTSH,DGUOK,DPP7,EEF1A1,EIF3A,EIF5,FABP2,FADS2,FDXR,FHIT,FTL,GAA,GUSB,GYS2,HRAS,Ighg2b,IGKC,Igkv1-117,ISG15,KCNMA1,KIAA0391,KRT1,KRT5,KRT8,MAN2B2,MAVS,MGLL,MINOS1,MOGS,MTRR,NCL,NEU1,NLN,NUS1,OAT,OS9,PAICS,PCYT1A,PDXK,PEX1,PEX11A,PEX19,PPT2,PRCP,PRDX1,PRELP,RAB5A,RALA,RPL10,R…	128 (43)	42					RAS
ARHGEF18	other		3	Activated	3.181	8.94e-19	Akt,ARHGEF18,BCAR1,Cdc42,CHUK,ERK,Focal adhesion kinase,HRAS,JAK2,MYC,Nfat (family),NFKB1,P38 MAPK,PI3K (complex),PPARG,Rac,RELA,RHOA,Tgf beta,TP53,ZAP70	ACOT12,ACSS2,AK2,AKAP1,ASS1,ATP5S,BCL2L1,CENPE,Ces1b/Ces1c,CKMT2,CNP,COL6A2,COPB1,COPB2,CPOX,CTSA,CTSZ,EEF1A1,EIF4E,FABP2,FADS2,FDXR,FHIT,G6PD,GLB1,GM2A,HDLBP,HRAS,Ighg2b,IGKC,KCNMA1,KRT72,KRT8,NCL,NLN,NUS1,OAT,PAICS,Pcmt1,PCYT1A,PDK2,PEX11A,PEX19,PLD3,PSAP,PSMA1,RAB5A,RALA,RPL10,RPL11,RPL12,RPL13,RPL21,RPL22,RPL23,RPL26,RPL27,RPL27A,Rpl34 (includes others),RPL35,Rpl36,RPL5,RPL6,RPL7,RPL7A,RPL9,R…	95 (21)	19
oxadiazon	chemical toxicant		3		1.017	2.9e-18	ACOX1,AKT1,Alp,AMPK,CAT,Creb,EGFR,ERK1/2,FOXO1,HSF1,hydrogen peroxide,IKBKB,INSR,JAK2,MAPK1,Nfat (family),NFkB (complex),NFKBIA,oxadiazon,P38 MAPK,PPARA,PRKAA,PRL,STAT3,TP53	ABCD2,ACOT2,ACSS2,ACY3,AK2,ANPEP,ARSB,BGN,BHMT,C8A,CDK5RAP3,CENPE,Ces1b/Ces1c,COPB1,CPOX,CTBS,CTNNA2,CTSA,CTSH,CTSZ,EIF4E,ELOVL5,FABP2,FADS2,FDXR,G6PC,G6PD,GLA,GLB1,GM2A,GPX4,HDLBP,HPD,HRAS,IDE,KCNMA1,KIAA0391,KRT1,KRT17,KRT5,KRT6B,KRT72,KRT8,LYZ,MAVS,MGLL,MRPL45,MRPL47,MRPL55,Mup1 (includes others),Nat8f2,NCL,NUS1,NUTF2,OAT,PAOX,Pcmt1,PDK2,PECR,PEX1,PEX11A,PLD3,PLIN3,PLSCR1,PPT2,PRDX1,PSAP,PSMA1…	117 (25)	24				ACOX1,Ldh (complex)	CAT
isoquercitrin	chemical drug		3	Inhibited	-2.649	3.29e-18	ACE,AGT,Akt,AKT1,AMPK,AR,AXIN1,BECN1,CAV1,CCND1,CDKN1B,CTNNB1,ERK1/2,ESRRA,EZH2,FOXO1,HDAC5,HNF4A,HRAS,INSR,Insulin,isoquercitrin,JUN,MAP2K3,MAPK1,MAPK14,MED1,MTOR,MYC,N-cor,NANOG,NFkB (complex),NOS2,NR5A2,P38 MAPK,PGR,PI3K (complex),PPARGC1A,PTGS2,RAF1,RB1,SIRT1,SMAD3,SREBF2,TCF7L2,TP53,TSC2	ABCD2,ACOT4,ACP6,ACSS2,AK2,AKAP1,ARG1,ARL1,ARSB,ASS1,BCL2L1,BGN,BHMT,CDK5RAP3,CELA1,COPB1,COPB2,CPOX,CREG1,CTBS,CTNNA2,CTSC,CTSH,CTSZ,DDX25,DPP7,EIF3A,EIF4E,EIF5,ELOVL5,ENPP4,ERMP1,ETNPPL,FADS2,FHIT,FMO3,FTL,FUCA1,G6PC,G6PD,GLA,GM2A,GUSB,GYS2,HNRNPK,HPD,HRAS,IDE,Ighg2a,IGKC,KCNMA1,KIAA0391,KRT1,Krt10,KRT13,KRT17,KRT8,MAVS,MGLL,MINOS1,MOGS,MRPL45,MRPL47,Mup1 (includes others),NEU1,NLN,OAT,PAICS,Pc…	137 (47)	45				AMPK,FASN,SREBF2
pazopanib	chemical drug		3	Activated	3.596	7.35e-18	AKT1,Ap1,ATF4,CD247,CD28,CD3,Cdc42,CHRNA7,Creb,CREB1,CREBBP,CSF1,CSF1R,CTNNB1,EGFR,EIF4E,ERBB2,ERK1/2,ESR1,FGFR1,FGFR2,FGFR3,FLT1,FLT4,HNRNPK,HRAS,HSF1,INPP5D,ITK,JAK2,JUN,KDR,KIT,LCK,MTOR,MYC,Nfat (family),NFkB (complex),NFKBIA,nitric oxide,pazopanib,PDGFRA,PDGFRB,PI3K (complex),RAC1,RB1,RET,SHC1,STAT3,STAT5A,STAT5B,TCR,TP53,VAV1,VAV3,Vegf	ACOT12,ACSS2,ACY3,AK2,AKAP1,ANO10,AP3B1,ARG1,ATP5S,BCL2L1,BCLAF1,BHMT,BZW1,CHIA,COPA,COPB1,COPB2,CPOX,CTSA,CTSC,CTSH,CTSZ,CXADR,DCAF8,DDX25,DGUOK,EEF1A1,EIF3A,EIF4E,FABP2,FADS2,FTL,GAA,GARS,GLA,GLB1,GYS2,HDLBP,IDE,Ighg2b,IGKC,KCNMA1,KIAA0391,KRT1,Krt10,KRT18,KRT5,KRT6B,MINOS1,MOGS,MRPL55,Mup1 (includes others),NCL,NLN,NUS1,NUTF2,OAT,OS9,PAICS,Pcmt1,PCYT1A,PDK2,PDXK,PEX1,PEX11A,PEX19,PLD3,PLIN3,PR…	143 (56)	48					FGFR1
imatinib	chemical drug		2	Activated	2.751	8.5e-18	Akt,CAV1,CDK2,CREB1,CSF1R,ERK1/2,ESR1,FOXO3,GAB1,imatinib,JAK2,KITLG,MAPK1,MYC,NFkB (complex),NFKBIA,P38 MAPK,p70 S6k,PDGFB,PRKN,RB1,STAT3,TP53	ACOT12,ACSS2,AK2,AKAP1,ANO10,ANPEP,AP3B1,ARG1,ARSB,ATP5S,BCL2L1,BCLAF1,BGN,BHMT,Ces1b/Ces1c,CKMT2,CNP,COL6A2,COPA,COPB1,CPOX,CTNNA2,CTSC,CTSZ,CXADR,EEF1A1,EIF4E,FABP2,FADS2,FHIT,G6PD,GAA,GLA,HDLBP,HRAS,IDE,IGKC,KCNMA1,Krt10,KRT6B,MINOS1,MRPL55,MVP,NCL,OAT,OS9,PAICS,Pcmt1,PCYT1A,PDK2,PDXK,PEX1,PEX19,PLD3,PPT2,PRCP,PRDX1,PSAP,PSMA1,RAB5A,RALA,RPL10,RPL11,RPL12,RPL13,RPL21,RPL22,RPL23,RPL26,RPL27,RP…	127 (23)	23				CEBPE,PPP2R5C	CCND1,EIF4B,GAB1,MYC,NFKBIA,PIK3CB,SRSF2,TP53,WRN
PPARα-RXRα	complex		3	Activated	3.124	1.07e-17	AKT1,Ap1,AR,CAV1,CD24,CD247,CEBPA,CEBPB,CRH,CTNNB1,EGFR,EHHADH,EIF4E,ERBB2,ESR1,estrogen receptor,FOXO1,FOXO3,HNF4A,IFNG,IL6,INSR,JAK2,JUN,KRAS,L-triiodothyronine,MAP2K4,MAPK1,MAPK13,MAPK14,MYC,NFkB (complex),NFKB1,NOS2,NR1H4,P38 MAPK,p70 S6k,PI3K (complex),PIM1,PLG,PPARA,PPARG,PPARα-RXRα,RAC1,RAS,RELA,RXRA,SMAD3,SMAD4,STAT3,STAT4,STAT5A,STAT6,UBD	ABCD2,ACOT12,ACOT2,ACP6,ACSS2,AK2,AKAP1,ANO10,ANPEP,AP3B1,ARG1,ARSA,ARSB,ASS1,ATP5S,BCLAF1,BGN,C8A,CDK5RAP3,CENPE,Ces1b/Ces1c,CNP,COL6A2,COPA,CPOX,CPT1A,CREG1,CTNNA2,CTSH,CTSZ,CYP2S1,DDB1,DGUOK,EEF1A1,EIF4E,EIF5,ELOVL5,ETF1,FABP2,FADS2,FDXR,FHIT,FMO3,G6PC,G6PD,GGH,GLA,GM2A,GUSB,GYS2,HPD,IDE,Ighg2a,Ighg2b,IGKC,ITGAV,KCNMA1,KIAA0391,KRT1,KRT18,KRT5,KRT6B,KRT8,LYZ,MAVS,MGLL,MINOS1,MOGS,MRPL45,MRPL47…	148 (54)	53		NCOR1		ACOX1,NFKBIA
RAS	group		2	Inhibited	-4.025	1.09e-17	Akt,AKT1,Ap1,Calcineurin protein(s),CEBPB,CREB1,EIF4E,ERK1/2,ESR1,HRAS,IKBKB,JUN,KRAS,MAP3K1,MAPK1,Mek,MTOR,MYC,Nfat (family),NFkB (complex),NFKBIA,P38 MAPK,PI3K (complex),PIK3C2B,PIK3CD,Pkc(s),PRKAA,PTGS2,RAC1,RAF1,RALGDS,RAS,RELA,SRF,STAT3,STAT5A,TSC2	ACOT12,ACSS2,AKAP1,ANO10,ANPEP,AP3B1,ARSB,ASS1,BCLAF1,BHMT,CENPE,Ces1b/Ces1c,CKMT2,CNP,COPA,COPB2,CREG1,CTNNA2,CTSH,DGUOK,DPP7,EEF1A1,EIF3A,EIF4E,EIF5,FABP2,FADS2,FDXR,FHIT,FTL,G6PD,GAA,GLA,GUSB,GYS2,HRAS,Ighg2b,IGKC,Igkv1-117,KCNMA1,KIAA0391,KRT1,KRT5,KRT6B,KRT8,MAN2B2,MGLL,MINOS1,MOGS,MTRR,NCL,NEU1,NLN,NUS1,OAT,OS9,PAICS,PCYT1A,PDXK,PEX1,PEX11A,PEX19,PPT2,PRCP,PRDX1,PRELP,RAB5A,RALA,RPL10,RPL11…	125 (37)	37	AGT,CCL11,FGF3,FGF6,FGFR1,Focal adhesion kinase,Grb2-Shc1-Sos,IGF1R,ingenol mebutate,Ins1,Insulin,KRAS,LGALS3,methyl-beta-cyclodextrin,mir-132,Ngf,PTK2,RBBP4,SKI,Sos,TCR,TP53,Trk Receptor	CD3D,DOK1,Eph Receptor,Ephb,EPHB2,epigallocatechin-gallate,FMR1,genistein,NF1,RASA1,sulindac sulfide,SYNGAP1,TNK1		CCND1,CDKN1A,Creb,FOS,MAPK3,MYC,PLCE1,PML,PTGS2,RAC1,SNAI1,SREBF1	NFKBIA,PRKAA,TSC2
HAVCR1	other		3	Inhibited	-3.055	1.21e-17	Akt,AKT1,Calcineurin protein(s),Cdc42,ERK,ERK1/2,HAVCR1,ITK,JUN,JUN/JUNB/JUND,JUNB,MAPK1,MTOR,Nfat (family),NFATC2,NFE2L2,P38 MAPK,PI3K (complex),RAS,SHC1,TCR,TP53,ZAP70	ACSS2,AGPAT3,ANPEP,ARSB,ASS1,ATP5S,BCL2L1,BGN,BHMT,CELA1,CENPE,Ces1b/Ces1c,CKMT2,CNP,COL6A2,COPB1,CPOX,CPT1A,CREG1,CTNNA2,CTSA,CTSZ,EEF1A1,EIF3A,EIF4E,FHIT,FTL,G6PD,GLB1,HDLBP,HRAS,IDE,ISG15,KCNMA1,KRT18,KRT8,LYZ,MGLL,MOGS,NUS1,OAT,Pcmt1,PDK2,PEX11A,PLSCR1,PPT2,PSAP,PSMD13,RAB5A,RACK1,RPL10,RPL10A,RPL12,RPL13A,RPL17,RPL18A,RPL22,RPL23,RPL3,RPL30,RPL31,Rpl34 (includes others),Rpl36,RPL38,RPL4,RPL6…	103 (23)	21
anisindione	chemical drug		3	Activated	3.544	1.22e-17	ALOX5,anisindione,ERK,GGCX,MGP,MYC,P38 MAPK,PPARG,TGFB1,TP53	ACOT12,ACSS2,AK2,AKAP1,ANPEP,ARG1,ASS1,ATP5S,BGN,CELA1,CENPE,Ces1b/Ces1c,CKMT2,CNP,COL6A2,COPB1,CPOX,CTSH,CXADR,DDB1,EEF1A1,EIF4E,FABP2,FADS2,FDXR,FTL,GARS,GLB1,GM2A,GUSB,HDLBP,HRAS,Ighg2b,ISG15,ITGAV,KCNMA1,KRT17,KRT6B,MGLL,MIA3,MVP,NCL,OAT,PAICS,Pcmt1,PDK2,PDXK,PEX11A,PEX19,PLSCR1,PSAP,PSMA1,RAB5A,RACK1,RPL10,RPL11,RPL12,RPL13,RPL21,RPL22,RPL23,RPL26,RPL27,RPL30,Rpl34 (includes others),RPL35,Rp…	109 (10)	8					ALOX5
strontium ranelate	chemical drug		3	Inhibited	-2.254	1.39e-17	Akt,Alp,AR,AXIN1,CCND1,Creb,CTNNB1,ERK,ESRRA,EZH2,FOXO1,JUN,Mek,MYC,N-cor,NANOG,NFATC1,NFkB (complex),P38 MAPK,PRL,PTGS2,RAF1,RBL1,SMAD3,strontium ranelate,TCF7L2,TP53	ABCD2,ACOT12,ACOT4,ACSS2,AK2,AKAP1,ANPEP,ASS1,ATP5S,BCL2L1,BCLAF1,BGN,CDK5RAP3,Ces1b/Ces1c,CKMT2,COL6A2,COPB1,CPOX,CTSA,CTSH,EEF1A1,EIF4E,EIF5,ELOVL5,ENPP4,FDXR,FHIT,FUCA1,G6PD,GLA,GM2A,GYS2,HDLBP,HRAS,IDE,ISG15,ITGAV,KCNMA1,KIAA0391,KRT1,Krt10,KRT13,KRT17,KRT5,KRT72,KRT8,MAVS,MGLL,MINOS1,MOGS,MRPL45,MRPL47,MRPL55,Mup1 (includes others),MVP,NCL,OAT,PAICS,Pcmt1,PCYT1A,PDK2,PEX19,PLIN3,PLSCR1,PRG2,…	123 (27)	24
AURK	group		3	Inhibited	-3.892	1.54e-17	AKT1,Ap1,AURK,AURKA,AURKB,BRCA1,ERK1/2,ESR1,Histone h3,HNRNPK,KMT2A,MYC,NFKBIA,RASSF1,RUVBL1,TP53,WWC1	ABCD2,ACOT12,ACSS2,AKAP1,ANO10,AP3B1,ASS1,ATP5S,BCL2L1,BCLAF1,BHMT,CKMT2,CNP,COL6A2,COPA,COPB1,CPOX,CREG1,CTSC,CTSH,CTSZ,CXADR,EEF1A1,EIF4E,FADS2,FDXR,GM2A,HDLBP,HIST2H2AC,HRAS,KCNMA1,Krt10,KRT6B,KRT8,MGLL,MINOS1,MVP,NCL,OAT,OS9,PAICS,Pcmt1,PDK2,PEX11A,PEX19,PLD3,PLSCR1,PRELP,PSAP,PSMA1,RPL10,RPL11,RPL12,RPL13,RPL21,RPL22,RPL23,RPL26,RPL27,RPL27A,RPL30,Rpl34 (includes others),RPL35,Rpl36,RPL5,RPL…	111 (17)	15					CDKN1A,PDE2A
APEX1	enzyme		3		-0.577	1.95e-17	AKT1,Ap1,APEX1,BCAR1,c-Src,CDKN2A,CEBPA,CSF2,E2F1,EGFR,EIF4E,EPAS1,ESRRA,FOS,FOXO1,FOXP3,GLI1,HIF1A,HNF4A,HSF1,IGF1R,IL2,IL6,Jnk,MAP2K1,MAPK1,Mek,MSH2,MTOR,MYC,NANOG,Nfat (family),NFE2L2,NFKB1,NFKBIA,NOTCH1,PGR,PI3K (complex),PPARA,PPARG,PTEN,SIRT1,SREBF1,STK11,temozolomide,TP53,TSC2,VEGFA,VHL,XBP1	ABCD2,ACOT12,ACOT2,ACP6,ACSS2,AGPAT3,AKAP1,ARSB,ATP5S,BCLAF1,BGN,C8A,CDK5RAP3,CELA1,CENPE,Ces1b/Ces1c,CKMT2,CNP,COL6A2,COPB1,COPB2,CPOX,CPT1A,CTBS,CTNNA2,CTSC,CTSH,CXADR,DARS2,DGUOK,DPP7,EEF1A1,EIF4E,ELOVL5,ERMP1,FARS2,FDXR,FMO3,G6PC,GAA,GARS,GGH,GLB1,GUSB,GYS2,HDLBP,HIST2H2AC,HNRNPK,HPD,HRAS,IDE,Ighg2a,IGKC,ISG15,ITGAV,KCNMA1,KIAA0391,KRT13,KRT18,KRT6B,KRT8,LYZ,MAVS,MINOS1,MRPL45,MRPL47,MVP,NCL,…	147 (50)	49	arsenite,MYC,nitrofurantoin,PPARA	brivudine,methotrexate			temozolomide
SNS 314	chemical drug		3	Activated	3.796	1.96e-17	AKT1,AURKA,AURKB,BRCA1,ERK1/2,HNRNPK,MYC,NFKBIA,RASSF1,SNS 314,TP53	ACOT12,ACSS2,AKAP1,ASS1,ATP5S,BCL2L1,BHMT,CENPE,CKMT2,CNP,COL6A2,COPB1,CPOX,CREG1,CTSH,CTSZ,EEF1A1,EIF4E,FADS2,FDXR,G6PD,GM2A,HDLBP,HRAS,KCNMA1,KRT6B,KRT8,MVP,NCL,OAT,PAICS,Pcmt1,PDK2,PEX11A,PEX19,PLD3,PLSCR1,PRELP,PSAP,PSMA1,RPL10,RPL11,RPL12,RPL13,RPL21,RPL22,RPL23,RPL26,RPL27,RPL27A,RPL30,Rpl34 (includes others),RPL35,Rpl36,RPL5,RPL6,RPL7,RPL7A,RPL8,RPL9,RPS12,RPS15A,RPS16,RPS18,RPS19,RPS2,RPS…	95 (11)	10
AMG 900	chemical drug		3	Activated	3.796	2.08e-17	AKT1,AMG 900,AURKA,AURKB,BRCA1,ERK1/2,HNRNPK,MYC,NFKBIA,RASSF1,TP53	ACOT12,ACSS2,AKAP1,ASS1,ATP5S,BCL2L1,BHMT,CENPE,CKMT2,CNP,COL6A2,COPB1,CPOX,CREG1,CTSH,CTSZ,EEF1A1,EIF4E,FADS2,FDXR,G6PD,GM2A,HDLBP,HRAS,KCNMA1,KRT6B,KRT8,MVP,NCL,OAT,PAICS,Pcmt1,PDK2,PEX11A,PEX19,PLD3,PLSCR1,PRELP,PSAP,PSMA1,RPL10,RPL11,RPL12,RPL13,RPL21,RPL22,RPL23,RPL26,RPL27,RPL27A,RPL30,Rpl34 (includes others),RPL35,Rpl36,RPL5,RPL6,RPL7,RPL7A,RPL8,RPL9,RPS12,RPS15A,RPS16,RPS18,RPS19,RPS2,RPS…	95 (11)	10
TTP607	chemical drug		3	Activated	3.796	2.08e-17	AKT1,AURKA,AURKB,BRCA1,ERK1/2,HNRNPK,MYC,NFKBIA,RASSF1,TP53,TTP607	ACOT12,ACSS2,AKAP1,ASS1,ATP5S,BCL2L1,BHMT,CENPE,CKMT2,CNP,COL6A2,COPB1,CPOX,CREG1,CTSH,CTSZ,EEF1A1,EIF4E,FADS2,FDXR,G6PD,GM2A,HDLBP,HRAS,KCNMA1,KRT6B,KRT8,MVP,NCL,OAT,PAICS,Pcmt1,PDK2,PEX11A,PEX19,PLD3,PLSCR1,PRELP,PSAP,PSMA1,RPL10,RPL11,RPL12,RPL13,RPL21,RPL22,RPL23,RPL26,RPL27,RPL27A,RPL30,Rpl34 (includes others),RPL35,Rpl36,RPL5,RPL6,RPL7,RPL7A,RPL8,RPL9,RPS12,RPS15A,RPS16,RPS18,RPS19,RPS2,RPS…	95 (11)	10
YY1	transcription regulator		2	Activated	3.162	2.34e-17	CDKN1B,MYC,SMAD7,TP53,YY1	ACOT12,ACSS2,AK2,AKAP1,ASS1,ATP5S,BCL2L1,BGN,CENPE,Ces1b/Ces1c,CKMT2,CNP,COL6A2,COPB1,CPOX,CTSH,DDX25,EEF1A1,EIF4E,FABP2,FADS2,FDXR,GLB1,GM2A,HDLBP,HRAS,ISG15,ITGAV,KCNMA1,KRT17,KRT18,KRT6B,MVP,NCL,OAT,PAICS,Pcmt1,PDK2,PEX19,PPT2,PSAP,PSMA1,RPL10,RPL11,RPL12,RPL13,RPL21,RPL22,RPL23,RPL26,RPL27,RPL30,Rpl34 (includes others),RPL35,Rpl36,RPL5,RPL6,RPL7,RPL7A,RPL9,RPS12,RPS15A,RPS16,RPS18,RPS19,RPS20…	90 (5)	5		sirolimus		HSPA5	CDKN1A,CFTR,FOS,TP53
Tcrd	other		3	Inhibited	-3.434	2.41e-17	Akt,AKT1,CAV1,CDK2,CEBPB,Creb,EGFR,ERBB2,ERK,ERK1/2,ESR1,FCER1G,FOXO3,IGF1R,IRS2,ITCH,JAK2,JUN,JUNB,MAP2K1,MAP2K3,MAPK1,MAPK8,Mek,mir-140,MTOR,MYC,OCLN,P38 MAPK,p70 S6k,PDK1,PI3K (complex),PIK3CA,RAF1,RAS,SHC1,SIRT1,SRC,STAT3,STAT5A,Tcrd,TP53,VAV2,VAV3	ACOT12,ACSS2,ACY3,AK2,AKAP1,ANO10,ANPEP,AP3B1,ARL1,ARSB,ASS1,ATP5S,BCL2L1,BGN,BHMT,CKMT2,CNP,COPA,COPB1,CPOX,CTNNA2,CTSH,CXADR,EEF1A1,EIF3A,EIF4E,ERMP1,FABP2,FADS2,FDXR,FHIT,FTL,GLB1,GM2A,GUSB,GYS2,HDLBP,Ighg2a,IGKC,KCNMA1,KIAA0391,KRT1,Krt10,KRT5,KRT6B,MAVS,MGLL,MINOS1,MOGS,MVP,NCL,NUTF2,OS9,PAICS,Pcmt1,PCYT1A,PDK2,PECR,PEX1,PEX11A,PEX19,PLIN3,PPT2,PRDX1,PRG2,PSAP,PSMA1,RAB5A,RALA,RPL10,RPL11,RP…	129 (44)	41				IGF1R	IL15
Creb	group		3	Inhibited	-2.173	2.65e-17	26s Proteasome,ATF2,ATF4,CCND1,CDKN2A,CEBPA,Creb,CREB1,CREB3L3,CREBBP,CTNNB1,DDIT3,E2F1,EIF4E,EPO,ERBB2,ERK1/2,ESR1,ESR2,ESRRA,EZH2,FOS,FOXO1,GATA1,HIF1A,HNF4A,IGF1R,IL2,IL6,INSR,KLF1,MAP2K1,MAPK1,MAPK9,mitomycin C,MMP2,MSH2,MTOR,MYC,MYOD1,N-cor,NANOG,NCOA1,Nfat (family),NFE2L2,NFKBIA,Nos,PGR,PPARA,PPARG,progesterone,RAF1,SAT1,TCF7L2,Tgf beta,TP53,TSC2	ABCD2,ACOT12,ACOT4,ACSS2,ACY3,AGPAT3,AKAP1,AMY2A,ANO10,AP3B1,ARG1,ARSB,ATP5S,BCL2L1,BGN,BHMT,C8A,CDK5RAP3,CELA1,CELSR3,CENPE,Ces1b/Ces1c,CKMT2,COL6A2,COPA,COPB1,CPT1A,CTBS,CTNNA2,CTSA,CTSH,CXADR,DARS2,DGUOK,DNASE2,DPP7,EEF1A1,EIF3A,EIF4E,EIF5,ELOVL5,ENPP4,FABP2,FARS2,FDXR,FMO3,FTL,FUCA1,G6PC,GAA,GARS,GGH,GLA,GLB1,GM2A,GUSB,HDLBP,HIST2H2AC,HNRNPK,HRAS,IGKC,ISG15,ITGAV,KCNMA1,KIAA0391,KRT1,KRT13,KR…	166 (57)	55	2-deoxyglucose,8-bromoguanosine 3',5'-cyclic monophosphate,AGT,BSCL2,cAMP-dependent protein kinase,cocaine,dehydroepiandrosterone sulfate,FGFR1,GCG,GIP,IGF1R,MAPK3,NF1,oleic acid,PPP1R1B,PRKACA,PRLR,PSEN2,RAS,sirolimus,SLC29A1	CSNK2A1,D-glucose,dextroamphetamine,genistein,KCNA3,NFE2L2,SPP1,troglitazone		ADIPOQ,CCND1,FOS,mir-132	TP53
PCGEM1	other		2	Inhibited	-4.636	2.81e-17	MYC,PCGEM1	ACOT12,AK2,AKAP1,ASS1,BCL2L1,CNP,CPT1A,EIF4E,FABP2,FADS2,G6PC,G6PD,GM2A,HRAS,KRT17,KRT6B,LYZ,NCL,OAT,PAICS,PEX19,RPL10,RPL11,RPL13,RPL21,RPL22,RPL23,RPL26,RPL27,RPL30,RPL35,RPL5,RPL6,RPL7,RPL7A,RPL9,RPS12,RPS15A,RPS16,RPS18,RPS19,RPS20,RPS23,RPS6,RPS7,RPS9,SARDH,SCPEP1,SKP2,SNRPD1,SRSF1,TALDO1,TMEM97,Tpm1,TXNRD1,VIM,YBX1	57 (2)	2				ACLY,ACOX1,FASN,GPI,MYC
ALOX5	enzyme		2	Inhibited	-3.464	3.39e-17	ALOX5,ERK,MYC,P38 MAPK,PPARG,TGFB1,TP53	ACOT12,ACSS2,AK2,AKAP1,ANPEP,ARG1,ASS1,ATP5S,BGN,CENPE,Ces1b/Ces1c,CKMT2,CNP,COL6A2,COPB1,CPOX,CTSH,CXADR,DDB1,EEF1A1,EIF4E,FABP2,FADS2,FDXR,FTL,GARS,GLB1,GM2A,GUSB,HDLBP,HRAS,Ighg2b,ISG15,ITGAV,KCNMA1,KRT17,KRT6B,MGLL,MIA3,MVP,NCL,OAT,PAICS,Pcmt1,PDK2,PDXK,PEX11A,PEX19,PLSCR1,PSAP,PSMA1,RAB5A,RACK1,RPL10,RPL11,RPL12,RPL13,RPL21,RPL22,RPL23,RPL26,RPL27,RPL30,Rpl34 (includes others),RPL35,Rpl36,RP…	108 (7)	7	ALOX5AP,arachidonic acid,PRKACA	anisindione,oleic acid,selenium,sulindac sulfide		ACOX1,CDKN1A,FABP1,PPARA	PTGS2
EPO	cytokine		2	Inhibited	-4.31	3.44e-17	Akt,AKT1,AMPK,CREB1,EPO,ERK,ERK1/2,FOXO3,GAB1,GATA1,GATA4,HRAS,INPP5D,JAK2,KRAS,MAPK1,MAPK14,MAPK9,Mek,MYC,nitric oxide,OSM,P38 MAPK,PI3K (complex),Raf,SIRT1,SMAD3,SOCS3,STAT3,STAT5A,STAT5B	ACOT12,ACOT2,AK2,AKAP1,ANPEP,ARSB,ASS1,BCL2L1,BCLAF1,BHMT,Ces1b/Ces1c,CKMT2,CNP,COPB2,CREG1,CTNNA2,CTSH,EEF1A1,EIF4E,EIF5,ERMP1,FABP2,FADS2,FDXR,FHIT,G6PC,G6PD,GAA,GM2A,GUSB,GYS2,HRAS,Ighg2a,Ighg2b,IGKC,KRT18,KRT5,MGLL,MTRR,NLN,OAT,PAICS,PCYT1A,PDXK,PEX1,PEX11A,PEX19,PLSCR1,PPT2,PRCP,PRDX1,PRG2,RAB4A,RAB5A,RPL10,RPL11,RPL13,RPL21,RPL22,RPL23,RPL26,RPL27,RPL27A,RPL30,RPL35,RPL5,RPL6,RPL7,RPL7A,RPL…	109 (31)	31	ciprofloxacin,Ins1,oleic acid	cadmium,genistein,N-nitro-L-arginine methyl ester,NFKBIA,VHL		AMPK,BLM,CDKN1A,DDIT3,FOS,GAB1,HRAS,IRS2,KRAS,MAPK3,MYC,NACA,Ngf,SPP1,SSRP1	CUL1,PTGS2,TP53
IGF1R	transmembrane receptor		2	Inhibited	-3.359	4.18e-17	Akt,AKT1,CAV1,Creb,EGFR,EIF2S1,ERBB2,ERK,ERK1/2,ESR1,FOXO3,IGF1R,IRS2,JAK2,JUN,JUNB,MAP2K1,MAP2K3,MAPK1,MAPK8,Mek,mir-140,MTOR,MYC,P38 MAPK,p70 S6k,PDK1,PI3K (complex),PIK3CA,RAF1,RAS,RB1,SHC1,SRC,STAT3,STAT5A,TP53,VAV3	ACOT12,ACSS2,ACY3,AK2,AKAP1,ANO10,ANPEP,AP3B1,ARL1,ARSB,ASS1,ATP5S,BCL2L1,BCLAF1,BGN,BHMT,CKMT2,CNP,COPA,COPB1,CPOX,CTNNA2,CTSC,CTSH,CXADR,EEF1A1,EIF3A,EIF4E,FABP2,FADS2,FDXR,FHIT,FTL,GLB1,GM2A,GUSB,GYS2,HDLBP,HRAS,KCNMA1,KIAA0391,KRT1,Krt10,KRT5,KRT6B,MGLL,MINOS1,MOGS,MRPL55,MVP,NCL,NUTF2,OS9,PAICS,Pcmt1,PDK2,PECR,PEX1,PEX11A,PEX19,PLIN3,PPT2,PRDX1,PSAP,PSMA1,RAB5A,RALA,RPL10,RPL11,RPL13,RPL17,R…	128 (38)	38	2-deoxyglucose,ADIPOQ,AGT,ciprofloxacin,GCG,GSK690693,HRAS,Ins1,Insulin,KRAS,NFKBIB,palmitic acid,PRL,Tcrd	CAT,epigallocatechin-gallate,genistein,IL15,L-triiodothyronine,mir-7,tanespimycin		CDH1,CDKN1A,Creb,DDIT3,FASN,Focal adhesion kinase,FOS,GCK,IL16,IRS2,MAPK3,mir-132,MYC,RAC1,RAS,SNAI1,SREBF1	CD37
HUWE1	transcription regulator		2	Activated	3.162	4.29e-17	AR,HUWE1,MCL1,MYC,TP53	ACOT12,ACSS2,AK2,AKAP1,ASS1,ATP5S,BCL2L1,CENPE,Ces1b/Ces1c,CKMT2,CNP,COL6A2,COPB1,CPOX,CTSH,EEF1A1,EIF4E,FABP2,FADS2,FDXR,GLB1,GM2A,HDLBP,HRAS,ISG15,ITGAV,KCNMA1,KRT17,KRT18,KRT6B,KRT8,MVP,NCL,OAT,PAICS,Pcmt1,PDK2,PEX19,PSAP,PSMA1,RPL10,RPL11,RPL12,RPL13,RPL21,RPL22,RPL23,RPL26,RPL27,RPL30,Rpl34 (includes others),RPL35,Rpl36,RPL5,RPL6,RPL7,RPL7A,RPL9,RPS12,RPS15A,RPS16,RPS18,RPS19,RPS20,RPS23,RPS…	90 (5)	4				CDKN1A	MYC,TP53,ZBTB17
DOCK5	other		3	Inhibited	-3.993	6.46e-17	Akt,AKT1,Cdc42,CDH1,CTNNB1,DOCK5,EGFR,ELAVL1,ERK,ERK1/2,ESR1,HIF1A,HRAS,JAK2,JUN,MAP3K1,MAPK1,MAPK11,MAPK14,Mek,MYC,Nfat (family),NFAT5,NFkB (complex),P38 MAPK,PI3K (complex),Rac,RAC1,RAC2,RAF1,RELA,ROCK2,SRF,STAT1,STAT3,TP53	ACOT12,ACSS2,AK2,AKAP1,ANO10,AP3B1,ARG1,ARSB,ASS1,ATP5S,BCL2L1,BCLAF1,BGN,BHMT,CENPE,Ces1b/Ces1c,CKMT2,CNP,COL6A2,COPA,COPB1,COPB2,CPOX,CPT1A,CTNNA2,CTSA,CTSC,CTSZ,CXADR,DDB1,EEF1A1,EIF4E,FABP2,FADS2,FHIT,G6PD,GLA,GLB1,GM2A,GUSB,HDLBP,HIST2H2AC,IGKC,Igkv1-117,KIAA0391,KRT1,Krt10,KRT13,KRT6B,KRT8,MAN2B2,MGLL,MINOS1,MOGS,Mup1 (includes others),NCL,NLN,NUS1,NUTF2,OS9,PAICS,Pcmt1,PCYT1A,PDK2,PEX1,PEX…	127 (36)	34				RAC1
2-deoxyglucose	chemical drug		2	Inhibited	-3.13	6.72e-17	2-deoxyglucose,Akt,AMPK,BAX,CAV1,Creb,EGFR,EIF2S1,ERBB2,ERK1/2,ESR1,FOXO3,INSR,JAK2,JUN,JUNB,MAP2K1,MAP2K3,MAPK1,MTOR,MYC,P38 MAPK,p70 S6k,RAF1,RB1,RELA,SHC1,SIRT1,STAT1,STAT5A,TP53	ACOT12,ACOT2,ACSS2,ACY3,AK2,AKAP1,ANO10,ANPEP,AP3B1,ARG1,ARL1,ARSB,ASS1,BCL2L1,BGN,BHMT,Ces1b/Ces1c,CKMT2,COPA,COPB1,CPOX,CTNNA2,CTSC,CTSH,CXADR,EEF1A1,EIF3A,EIF4E,ERMP1,FABP2,FADS2,FDXR,FHIT,FTL,G6PD,GLB1,GM2A,GUSB,GYS2,HDLBP,HRAS,Ighg2a,KCNMA1,KIAA0391,KRT1,Krt10,KRT18,KRT8,MGLL,MINOS1,MOGS,MRPL55,MVP,NCL,NUTF2,OS9,PAICS,Pcmt1,PDK2,PEX19,PLIN3,PPT2,PSAP,PSMA1,RAB5A,RALA,RPL10,RPL11,RPL12,RPL13,…	125 (31)	31	GCK			AMPK,CDKN1A,Creb,DDIT3,FOS,glycogen,HSP90B1,HSPA5,IGF1R,MYC,PRKAA,PRKAA1,PTGS2,TP53,TXNIP	CCND1,MYCN,putrescine
mannosylated lipoarabinomannan	chemical - endogenous non-mammalian		3		1.069	7.98e-17	AMPK,Ap1,BCL2,CD247,CD28,CD3,CREB1,EGFR,ERK1/2,ESR1,HNRNPK,HRAS,IL15,LAT,LCK,mannosylated lipoarabinomannan,MAPK9,MTOR,Nfat (family),NFkB (complex),NFKBIA,PTGS2,RAC1,REL,SHC1,STAT3,STAT5A,TCR,TLR2/TLR4,TLR4,TP53,VAV1,VAV3,ZAP70	ACSS2,AK2,ANO10,AP3B1,ATP5S,BCL2L1,BCLAF1,BHMT,BZW1,Ces1b/Ces1c,CKMT2,CNP,COPA,COPB1,COPB2,CPOX,CTSC,CTSZ,CXADR,DARS2,EEF1A1,EIF3A,FADS2,FTL,GAA,GARS,GLA,GLB1,GM2A,GYS2,HDLBP,HRAS,Ighg2b,IGKC,ISG15,ITGAV,KCNMA1,KIAA0391,KRT5,KRT6B,KRT8,LYZ,MINOS1,NCL,NLN,NUS1,NUTF2,OAT,OS9,Pcmt1,PCYT1A,PDK2,PDXK,PEX1,PLD3,PRCP,PRELP,PSAP,PSMA1,RALA,RPL10,RPL10A,RPL13A,RPL17,RPL18A,RPL22,RPL27A,RPL3,RPL30,RPL31,Rp…	126 (34)	30					NFKBIA
ARG2	enzyme		3	Activated	2.53	8.28e-17	26s Proteasome,ARG2,BAX,BCL2,Ca2+,EGFR,ERK,FOXO1,HIF1A,LIPE,MAP2K3,MAP2K6,MAPK1,mitomycin C,MTOR,MYC,NFKB1,Nos,NOS2,p70 S6k,Pkc(s),PLC,PTGS2,STAT4	ACOT12,ACP6,ACSS2,AK2,AKAP1,ANPEP,ARL1,ARSB,ASS1,CDK5RAP3,CENPE,CKMT2,CNP,COL6A2,CPT1A,CTNNA2,CTSA,CTSC,CTSH,EEF1A1,EIF3A,EIF4E,FABP2,FADS2,G6PC,G6PD,GM2A,HIST2H2AC,HRAS,Ighg2b,ISG15,KIAA0391,KRT1,Krt10,KRT8,LYZ,MAVS,MRPL45,MRPL47,MRPL55,NCL,NUTF2,OAT,PAICS,PEX19,PLSCR1,PPT2,PRDX1,PSAP,RPL10,RPL11,RPL12,RPL13,RPL21,RPL22,RPL23,RPL26,RPL27,RPL30,RPL35,RPL5,RPL6,RPL7,RPL7A,RPL9,RPS12,RPS15A,RPS16,R…	90 (24)	21	Insulin,TO-901317
HDAC10	transcription regulator		3	Inhibited	-3.007	8.65e-17	E2F1,HDAC10,Jnk,MYC,PAX3,STAT3,TP53,TRIM28	ACOT12,ACSS2,AK2,AKAP1,ASS1,ATP5S,BCL2L1,CENPE,Ces1b/Ces1c,CKMT2,CNP,COL6A2,COPB1,CPOX,CTSH,EEF1A1,EIF4E,FABP2,FADS2,FDXR,FHIT,GLB1,GM2A,HDLBP,HNRNPK,HRAS,ITGAV,KCNMA1,KRT1,KRT17,KRT18,KRT6B,KRT8,MVP,NCL,OAT,PAICS,Pcmt1,PDK2,PEX1,PEX19,PLSCR1,PSAP,PSMA1,RPL10,RPL11,RPL12,RPL13,RPL21,RPL22,RPL23,RPL26,RPL27,RPL30,Rpl34 (includes others),RPL35,Rpl36,RPL5,RPL6,RPL7,RPL7A,RPL9,RPS12,RPS15A,RPS16,RPS1…	93 (8)	6					TXNIP
PPP2R2B	phosphatase		2	Activated	4.811	8.66e-17	CCNE1,MYC,PPP2R2B	ACOT12,AK2,AKAP1,ASS1,BCL2L1,CNP,CPT1A,EIF4E,FABP2,FADS2,G6PC,GM2A,HRAS,KRT17,KRT6B,LYZ,NCL,OAT,PAICS,PCYT1A,PEX19,RPL10,RPL11,RPL13,RPL21,RPL22,RPL23,RPL26,RPL27,RPL30,RPL35,RPL5,RPL6,RPL7,RPL7A,RPL9,RPS12,RPS15A,RPS16,RPS18,RPS19,RPS20,RPS23,RPS6,RPS7,RPS9,SARDH,SCPEP1,SKP2,SNRPD1,SRSF1,TMEM97,Tpm1,TXNRD1,VIM,YBX1	56 (3)	2	palmitic acid				MYC
SGI 1776	chemical drug		3	Activated	3.638	1.1e-16	Akt,AKT1,AR,ATF4,BAD,BCL2,CCND3,CDH1,CDKN1A,CDKN2A,CSF2,CTNNB1,EIF4E,EIF4EBP1,ERK,ERK1/2,F2,FOS,FOXP3,MAPK14,Mek,MYC,NFE2L2,NFkB (complex),NFKBIA,P38 MAPK,PIM1,PIM2,PIM3,PTEN,RAF1,RELA,SGI 1776,STAT6,Tgf beta,TP53,TSC2,ZBTB17	ACOT12,AGPAT3,AK2,AKAP1,ANPEP,ASS1,ATP5S,BHMT,CELA1,CENPE,CKMT2,CNP,COPB1,CPT1A,CREG1,CTSC,CTSZ,DDB1,DGUOK,DPP7,EEF1A1,EIF4E,FABP2,FADS2,FARS2,FDXR,FHIT,G6PC,GARS,GLA,GLB1,GM2A,GUSB,HDLBP,HRAS,IDE,Ighg2b,Igkv1-117,ITGAV,KCNMA1,KIAA0391,KRT13,KRT17,KRT18,KRT6B,KRT72,LYZ,MGLL,MOGS,Mup1 (includes others),MVP,NCL,NUS1,OAT,PAICS,Pcmt1,PEX11A,PEX19,PLA2G15,PLD3,PRDX1,PRELP,PSAP,PSMD13,RAB5A,RACK1,RALA,…	127 (38)	33					CCND1,CDKN1A,MYC
SIRT7	enzyme		2	Activated	3.459	1.26e-16	EPAS1,HIF1A,MTOR,MYC,SIRT7,TP53	ACOT12,ACSS2,AK2,AKAP1,ARG1,ASS1,ATP5S,BGN,CENPE,Ces1b/Ces1c,CKMT2,COL6A2,COPB1,CPOX,CTSH,EEF1A1,EIF3A,EIF4E,FABP2,FADS2,FDXR,GLB1,GM2A,GYS2,HDLBP,HIST2H2AC,HRAS,ISG15,ITGAV,KCNMA1,KRT17,KRT18,KRT6B,KRT8,MVP,NCL,OAT,PAICS,Pcmt1,PDK2,PEX19,PSAP,PSMA1,RPL10,RPL11,RPL12,RPL13,RPL21,RPL22,RPL26,RPL27,RPL30,Rpl34 (includes others),RPL35,Rpl36,RPL5,RPL6,RPL7,RPL7A,RPL9,RPS12,RPS15A,RPS16,RPS18,RPS19,RP…	91 (6)	6		D-glucose			MYC,TP53
MYC	transcription regulator		1	Inhibited	-4.719	1.43e-16	MYC	ACOT12,AK2,AKAP1,ASS1,BCL2L1,CNP,CPT1A,EIF4E,FABP2,FADS2,G6PC,GM2A,HRAS,KRT17,KRT6B,LYZ,NCL,OAT,PAICS,PEX19,RPL10,RPL11,RPL13,RPL21,RPL22,RPL23,RPL26,RPL27,RPL30,RPL35,RPL5,RPL6,RPL7,RPL7A,RPL9,RPS12,RPS15A,RPS16,RPS18,RPS19,RPS20,RPS23,RPS6,RPS7,RPS9,SARDH,SCPEP1,SKP2,SNRPD1,SRSF1,TMEM97,Tpm1,TXNRD1,VIM,YBX1	55 (1)	1	2-deoxyglucose,5-fluorouracil,ADI PEG20,AGT,Aldose Reductase,benzyloxycarbonyl-Leu-Leu-Leu aldehyde,cadmium,CD 437,CNBP,CSF2RB,diethylnitrosamine,EPO,gemfibrozil,GNA12,IGF1R,IL15,IRS2,LGALS3,LRP6,methapyrilene,MST1R,MUC1,PAX4,PCGEM1,phenacetin,pirinixic acid,PPP1R1B,PRL,PRLR,RAC1,RACK1,RAS,sirolimus,TCR,TSH,USF2	15-deoxy-delta-12,14 -PGJ 2,3-deazaneplanocin,bardoxolone methyl,bryostatin 1,docosahexaenoic acid,epigallocatechin-gallate,genistein,HUWE1,imatinib,L-triiodothyronine,methyl-beta-cyclodextrin,NF1,nitrofurantoin,PPP2R2B,PRKACA,RBM14,roscovitine,SGI 1776,SH2B2,SIRT7,SPP1,tanespimycin,troglitazone,xanthohumol		APEX1,arachidonic acid,CDK4/6,CUL1,CYTH2,FABP1,FASN,GCK,GFPT1,glycogen,GPI,KRAS,KRT14,METAP2,mir-7,MSH2,MTBP,NFE2L2,NQO1,PFKFB1,POLDIP3,PRKAA,PTGS2,SRSF2,TRAP1,Ubiquitin,WRN	CYP,DDIT3,FOS,HLA-B,MYCN,ZBTB17
NCK2	kinase		3		1.105	7.85e-16	AKT1,APP,ATF4,BCL2,CCND1,CDC42,Cdc42,CDH1,Creb,CREB1,EIF2A,EIF2S1,estrogen receptor,FOS,HIF1A,HSF1,IGF1R,IL6,JAK2,MAP2K1,MAP2K3,MAP3K1,MAPK1,MAPK3,MED1,Mek,MTOR,MYD88,NCK2,Nfat (family),NFE2L2,NFKBIA,P38 MAPK,p70 S6k,PDGFB,PI3K (complex),PPARG,PTEN,PTK2,RAF1,RB1,SREBF1,SREBF2,SRF,TP53,TSC2,TWIST1,XBP1	ACP6,ACY3,AGPAT3,AK2,AKAP1,ARL1,ARSB,ASS1,ATP5S,BCLAF1,CELA1,CENPE,Ces1b/Ces1c,CKMT2,CNP,COL6A2,COPB2,CPOX,CTNNA2,CTSA,CXADR,DDB1,DPP7,Ear2 (includes others),EEF1A1,EIF3A,EIF4E,EIF5,FADS2,FARS2,GAA,GARS,GLB1,GM2A,GUSB,HDLBP,HIST2H2AC,HRAS,IDE,Ighg2b,Igkv1-117,KCNMA1,KIAA0391,KRT1,KRT13,KRT5,MAN2B2,MRPL55,NUS1,OAT,Pcmt1,PCYT1A,PDK2,PECR,PLD3,PLIN3,PPT2,PRCP,PRELP,PRG2,PSAP,PSMA1,PSMD13,RAB5A,RACK1…	118 (48)	44	TP53			PTK2	DDIT3,MAPK3
5-fluorouracil	chemical drug		1	Activated	3.78	2.99e-15	5-fluorouracil	BCL2L1,FDXR,GARS,MVP,NCL,RPL10,RPL10A,RPL11,RPL21,RPL23,RPL24,RPL27A,RPL30,RPL31,RPL35,RPL35A,RPL38,RPL5,RPL6,RPL7,RPL7A,RPS13,RPS15A,RPS16,RPS23,RPS4Y1,RPS8,YBX1	28 (1)	1				CDKN1A,DDIT3,KRAS,mir-132,MYC,NFKBIA,PTGS2,TP53	CCND1,NACA,PTK2,SRSF2
Tween 20	chemical toxicant		3		-0.44	4.48e-15	AGT,Akt,AKT1,Cdc42,Creb,CREB1,EGFR,EGR1,EPB41,ERBB2,ERK,ERK1/2,FOS,FOXO1,HIF1A,HRAS,IGF1R,ITCH,JAK2,JUN,KRAS,MAP2K4,MAPK1,MAPK14,Mek,NFKBIA,P38 MAPK,PGR,PI3K (complex),PPARA,PPARG,PTEN,PTGS2,RAS,SHC1,SP1,STAT3,STAT5B,STAT6,STK11,TP53,Tween 20	ABCD2,ACOT2,ACP6,ACSS2,ACY3,AKAP1,ANPEP,ARG1,ARSB,ATP5S,BHMT,C8A,CDK5RAP3,CENPE,Ces1b/Ces1c,CKMT2,COL6A2,COPB1,COPB2,CPOX,CTBS,CTNNA2,CTSA,CTSZ,CXADR,EIF3A,EIF4E,EIF5,ELOVL5,FABP2,FADS2,FARS2,FHIT,FTL,G6PD,GLB1,GM2A,GUSB,HDLBP,HIST2H2AC,HPD,Ighg2b,IGKC,ITGAV,KCNMA1,KIAA0391,KRT1,Krt10,KRT17,KRT5,MAVS,MGLL,MOGS,MRPL45,MRPL47,MRPL55,MTRR,NCL,NEU1,NLN,NUTF2,PAICS,Pcmt1,PCYT1A,PDK2,PDXK,PECR,PEX1,PEX…	129 (42)	41				PTGS2
CD37	other		3	Activated	2.254	4.81e-15	Akt,AKT1,CD247,CD28,CD3,CD37,CD4,CD8,Cdc42,CDH1,CREB1,CTNNB1,EGFR,ERK,ERK1/2,ESR1,Focal adhesion kinase,HIF1A,HNRNPK,HRAS,JUN,LCK,MAP3K1,Mek,Nfat (family),NFAT5,NFkB (complex),NFKBIA,PI3K (complex),RAC1,RAF1,SHC1,SRF,STAT3,STAT5A,TCR,TP53,VAV1,VAV3	ACSS2,AK2,ANO10,AP3B1,ATP5S,BCL2L1,BCLAF1,BHMT,BZW1,CENPE,Ces1b/Ces1c,CKMT2,COL6A2,COPA,COPB1,COPB2,CPOX,CTSA,CTSC,CTSZ,CXADR,DDB1,EEF1A1,EIF4E,FABP2,FHIT,FTL,GAA,GLA,GLB1,GM2A,GYS2,HDLBP,HIST2H2AC,HRAS,IGKC,Igkv1-117,KIAA0391,Krt10,KRT13,KRT18,KRT5,KRT6B,KRT8,MAN2B2,MGLL,MINOS1,MOGS,Mup1 (includes others),NCL,NLN,NUS1,NUTF2,OS9,Pcmt1,PCYT1A,PDK2,PDXK,PEX1,PEX11A,PLD3,PRCP,PRELP,PRG2,PSAP,PSMA1,R…	123 (39)	37		IGF1R			RAC1
phosphocreatine	chemical - endogenous mammalian		3		-0.664	6.26e-15	26s Proteasome,AMPK,BECN1,CAV1,CDKN1B,CTNNB1,ELAVL1,ERK,FOXO1,HDAC5,HIF1A,HNF4A,HRAS,HSF1,INSR,Insulin,MAP2K3,MAPK1,MED1,MTOR,NOS2,P38 MAPK,PGR,phosphocreatine,PPARGC1A,PRKAA,PTGS2,RAC1,RAF1,RAP1B,RB1,SIRT1,SREBF1,TP53,TSC1,TSC2	ACOT12,ACP6,ACSS2,ANPEP,ARG1,ARL1,ARSB,BCLAF1,CDK5RAP3,CENPE,CNP,COPB1,COPB2,CPOX,CPT1A,CREG1,CTBS,CTNNA2,CTSA,CTSC,CTSH,CTSZ,CXADR,DDX25,DPP7,EIF3A,EIF4E,ERMP1,ETNPPL,FABP2,FDXR,FMO3,FTL,G6PC,GLA,GUSB,HIST2H2AC,HNRNPK,HPD,HRAS,IDE,Ighg2a,IGKC,KCNMA1,KIAA0391,Krt10,KRT17,KRT18,KRT6B,KRT8,LYZ,MAVS,MGLL,MRPL45,MRPL47,NCL,NEU1,NLN,OAT,Pcmt1,PCYT1A,PECR,PLIN3,PPT2,PRELP,PSAP,PSMA1,RAB5A,RALA,RNASET2,…	111 (36)	34	Insulin				AMPK,PRKAA
gemfibrozil	chemical drug		3		1.311	1.07e-14	ACOX1,Akt,AKT1,AR,benzo(a)pyrene,Cdc42,CDK5,CEBPA,CHUK,Creb,CREB1,CYP1A2,CYP2C8,CYP2C9,EGR1,EIF4E,ERN1,FOXO1,gemfibrozil,HNF4A,HRAS,IKBKB,JUN,MAPK1,MAPK14,MTOR,NFKBIA,NQO1,paclitaxel,PI3K (complex),PIK3CB,PIK3CD,PIK3R1,PPARA,SIRT1,tanespimycin,TERT,TP53,VEGFA	ABCD2,ACOT2,ACSS2,ACY3,AK2,ARG1,ARSB,ASS1,ATP5S,BCL2L1,BCLAF1,C8A,CDK5RAP3,Ces1b/Ces1c,CNP,COL6A2,COPB1,COPB2,CPOX,CPT1A,CREG1,CTBS,CTNNA2,CTSA,DDB1,DGUOK,EIF3A,EIF4E,ELOVL5,ERMP1,FABP2,FADS2,FHIT,FMO3,FTL,G6PC,G6PD,GAA,GGH,GLB1,GM2A,GPX4,GUSB,HDLBP,Ighg2a,Ighg2b,IGKC,ISG15,KRT1,KRT8,LYZ,MAVS,MGLL,MOGS,MRPL45,MRPL47,Nat8f2,NLN,OAT,Pcmt1,PCYT1A,PDK2,PDXK,PLD3,PLIN3,PLSCR1,PPT2,PRCP,PRDX1,PSMA1,RAL…	114 (39)	35				ACOX1,CCND1,EHHADH,MYC,NFKBIA,NQO1,PIK3CB,PPARA
stibogluconic acid	chemical drug		3		-1.245	1.66e-14	AKT1,BCAR1,CD247,CD28,CDK2,EGFR,ERBB2,ERK,FASN,Focal adhesion kinase,HRAS,Ifn,IGF1R,INPP5D,JAK2,JUN,MAPK1,MTOR,NFKBIA,NOS2,PI3K (complex),PRKAA2,PTPN11,RAS,SHC1,SLC29A1,SMAD3,STAT1,STAT5B,stibogluconic acid,TCR,TOP1,TP53,TSC2,VAV1,VAV2	ACSS2,AK2,ANPEP,ARG1,ARSB,ASS1,ATP5S,BCL2L1,BGN,BZW1,CENPE,Ces1b/Ces1c,CNP,COPB1,COPB2,CPOX,CPT1A,CREG1,CTNNA2,CTSC,CTSH,CTSZ,DPP7,EEF1A1,EIF3A,EIF4E,FHIT,FTL,GLB1,GM2A,GUSB,HDLBP,Ighg2b,IGKC,ISG15,KCNMA1,KIAA0391,KRT5,MAVS,MOGS,NCL,NEU1,NLN,NUTF2,OAT,PAICS,Pcmt1,PCYT1A,PDK2,PECR,PEX11A,PLD3,PPT2,PRDX1,PRELP,PSAP,PSMA1,RALA,RPL10,RPL10A,RPL13A,RPL17,RPL18A,RPL22,RPL3,RPL31,Rpl34 (includes others)…	109 (36)	35
GFPT1	enzyme		3		-0.878	2.18e-14	26s Proteasome,AMPK,CAV1,ERK,ERK1/2,FASN,FOXO1,GFPT1,HIF1A,HRAS,HSF1,MAPK1,MTOR,NFE2L2,NFkB (complex),NFKB1,NFKBIA,P38 MAPK,PDX1,PNPLA2,PRKAA,PRKAA1,RAF1,RELA,SREBF1,STAT3,TP53,TSC1,TSC2	ACOT2,ACSS2,AGPAT3,AK2,ANPEP,ARG1,ARSB,ATP5S,BGN,CDK5RAP3,CELA1,CENPE,CNP,COL6A2,COPB1,COPB2,CPOX,CPT1A,CREG1,CTNNA2,CTSA,CTSH,CTSZ,CXADR,DPP7,EIF3A,EIF4E,FADS2,FTL,GLA,GM2A,GUSB,HDLBP,HIST2H2AC,HRAS,IDE,IGKC,KCNMA1,KIAA0391,KRT17,KRT18,KRT8,LYZ,MAVS,MGLL,MOGS,MRPL45,MRPL47,MRPL55,NEU1,NLN,OAT,Pcmt1,PCYT1A,PEX1,PLD3,PPT2,PRELP,PSAP,PSMA1,PSMD13,RAB5A,RACK1,RALA,RNASET2,RPL10,RPL12,RPL22,RPL30,Rpl…	105 (29)	28	AGT,MYC	D-glucose,genistein,PRKACA		PRKAA,PRKAA1,USF2	GCK,Insulin
NT5C1A	phosphatase		3		-0.677	2.7e-14	ACACA,AKT1,AMPK,BECN1,CAV1,CDKN1B,CTNNB1,ELAVL1,ERK,ERK1/2,FOXO1,HDAC5,HNF4A,HRAS,INSR,Insulin,MAP2K3,MAPK1,MAPK14,MED1,MTOR,NOS2,NT5C1A,P38 MAPK,PGR,PI3K (complex),PPARGC1A,PTGS2,RB1,SIRT1,TP53,TSC2	ACOT12,ACP6,ACSS2,ANPEP,ARG1,ARL1,ARSB,ASS1,BCLAF1,BHMT,CDK5RAP3,CENPE,CNP,COPB1,COPB2,CPOX,CREG1,CTBS,CTNNA2,CTSC,CTSH,CTSZ,DDX25,DPP7,EIF3A,ERMP1,ETNPPL,FABP2,FDXR,FHIT,FMO3,FTL,G6PC,GLA,GLB1,GUSB,HNRNPK,HPD,HRAS,IDE,Ighg2a,IGKC,KCNMA1,Krt10,KRT17,KRT18,KRT8,LYZ,MAVS,MRPL45,MRPL47,NCL,NEU1,NLN,OAT,Pcmt1,PCYT1A,PECR,PEX11A,PLIN3,PPT2,PRDX1,PRELP,PSAP,PSMA1,RAB5A,RALA,RPL10,RPL12,RPL27A,RPL30,Rpl…	107 (32)	31					AMPK
citrulline	chemical - endogenous mammalian		3		1.6	3.24e-14	26s Proteasome,Akt,AKT1,arginase,citrulline,ERK,ERK1/2,FASN,FOXO1,HIF1A,HSF1,IKBKB,MPO,MTOR,Nfat (family),NFkB (complex),NR3C1,P38 MAPK,PLG,PPARGC1A,PRKAA,RAF1,SIRT1,Sod,SREBF1,STIM1,TP53,TSC1,TSC2	ACSS2,ARG1,ASS1,ATP5S,BCLAF1,BGN,BHMT,CDK5RAP3,CENPE,Ces1b/Ces1c,CNP,COL6A2,COPB1,CPOX,CPT1A,CREG1,CTSA,CTSH,CTSZ,CXADR,CYP2S1,DPP7,EEF1A1,EIF3A,EIF4E,ERMP1,FADS2,FHIT,G6PC,G6PD,GM2A,HDLBP,HIST2H2AC,HRAS,Ighg2a,KCNMA1,KIAA0391,KRT17,KRT18,KRT6B,LYZ,MAVS,MGLL,MRPL45,MRPL47,MRPL55,MVP,NEU1,NUS1,Pcmt1,PCYT1A,PEX11A,PLD3,PRDX1,PRELP,PSAP,PSMA1,RAB5A,RALA,RNASET2,RPL10,RPL12,RPL22,RPL23,Rpl34 (include…	100 (29)	26		N-nitro-L-arginine methyl ester		PRKAA
MHC	complex		3	Inhibited	-2.254	3.36e-14	Akt,AKT1,AMPK,Ap1,ATF4,B2M,Ca2+,CD3,Cdc42,CDK9,CHRNA7,Creb,CREB1,ERK1/2,FOS,HLA-B,HLA-C,HLA-DQA1,HRAS,HSF1,IFNG,IL2,ITPR,JUN,JUNB,MAP2K4,MAP3K1,MAPK1,MAPK11,MAPK12,MAPK13,MAPK14,MAPK9,Mek,MHC,MTOR,Nfat (family),NFkB (complex),NFKB1,NFKBIA,NR4A1,P38 MAPK,PI3K (complex),PIK3CD,RAC1,Raf,RAF1,RAS,RB1,REL,RELA,SHC1,SREBF1,SRF,STAT3,STAT4,STAT5A,STAT5B,STAT6,TCR,VAV1,VAV2,VAV3	ACP6,ACSS2,ACY3,AK2,ANPEP,ARSB,ASS1,BCL2L1,BHMT,BZW1,Ces1b/Ces1c,CKMT2,CNP,COL6A2,COPB2,CTNNA2,CTSA,CTSH,CXADR,DARS2,DDB1,EIF3A,EIF4E,FADS2,FARS2,FDXR,FHIT,FTL,G6PD,GAA,GARS,GLA,GLB1,GUSB,GYS2,IDE,Ighg2a,Ighg2b,IGKC,Igkv1-117,KCNMA1,KIAA0391,KRT1,Krt10,KRT5,KRT6B,LYZ,MAN2B2,MGLL,MOGS,MRPL55,NCL,NLN,NUS1,OAT,Pcmt1,PCYT1A,PDXK,PEX1,PEX11A,PLIN3,PPT2,PRCP,PRDX1,PRG2,RAB5A,RACK1,RALA,RNASET2,RPL10,RP…	123 (63)	57				TCR
ITGA2B	transmembrane receptor		3		-0.378	3.72e-14	AHR,AKT1,CCND1,CD247,Cdc42,CDH1,Creb,CREB1,EGFR,FOXO1,HNF1A,IKZF1,IL6,ITGA2B,ITGB3,JAK2,MAP2K1,MAPK1,MAPK14,MTOR,MYD88,Nfat (family),NFKBIA,P38 MAPK,PI3K (complex),PTEN,PTK2,Raf,RAS,REL,STAT3,STAT5A,SYK,TCF,TCF7L2,Tgf beta,TICAM1,TP53,TSC2,ZEB1	ABCD2,ACOT4,ACY3,AK2,AKAP1,ANPEP,ARSB,ASS1,BCLAF1,C8A,CDK5RAP3,CENPE,Ces1b/Ces1c,CKMT2,COPB1,CPOX,CREG1,CTNNA2,CTSA,CXADR,DDB1,DPP7,Ear2 (includes others),EEF1A1,EIF3A,EIF4E,EIF5,ENPP4,FABP2,FADS2,FMO3,G6PD,GAA,GLB1,GM2A,GUSB,GYS2,HDLBP,ITGAV,KCNMA1,KIAA0391,KRT13,KRT72,KRT79,MAVS,MRPL45,MRPL47,MRPL55,NCL,NUS1,NUTF2,Pcmt1,PDK2,PDXK,PEX1,PEX11A,PLD3,PLIN3,PPT2,PRCP,PRDX1,PRELP,PSAP,PSMA1,RAB5A,RPL…	112 (40)	37	linolenic acid	TP53		PTK2
Ctbp	group		2		0.232	3.75e-14	CDH1,CEBPA,Ctbp,NRIP1,TP53	ACSS2,ARG1,ATP5S,BCL2L1,BHMT,CENPE,Ces1b/Ces1c,CKMT2,COL6A2,COPB1,CPOX,CPT1A,CREG1,CTSH,DDB1,EEF1A1,EIF4E,FABP2,FDXR,G6PC,GGH,GLB1,GYS2,HDLBP,HRAS,ISG15,ITGAV,KCNMA1,KRT13,KRT17,KRT18,KRT8,LYZ,MVP,OAT,OPLAH,Pcmt1,PSAP,PSMA1,RALA,RPL10,RPL12,Rpl34 (includes others),Rpl36,RPL5,RPL7,RPS12,RPS16,RPS18,RPS19,RPS20,RPS25,RPS26,RPS27L,RPS3,RPS5,SCO2,SCPEP1,SERPINF1,SGPL1,SKP2,SLC25A4,SMPDL3A,SRSF3,SUOX,…	74 (5)	4		benzyloxycarbonyl-Leu-Leu-Leu aldehyde		PLAUR,TP53	NRIP1
saracatinib	chemical drug		3	Activated	2.043	4.74e-14	ABL1,Akt,AKT1,AMPK,APP,AR,CCND1,CD247,CDH1,CDKN1B,CHUK,Creb,CTNNB1,EGFR,EGR1,EIF4E,ERBB2,ERK,ERK1/2,ESR1,ETS1,FOS,FOXO1,FOXO3,GPX1,HINT1,HNRNPK,HRAS,IGF1R,IKBKB,IRF4,JAK2,JUN,KAT5,KRAS,MAP2K3,MAP3K1,MAPK1,MAPK9,MTOR,NFAT5,NFKBIA,NOS2,P38 MAPK,PGR,PI3K (complex),PKD1,RAF1,RAS,RB1,RELA,saracatinib,Sfk,SHC1,SPTAN1,SRC,SRC (family),STAT3,STAT5A,STAT5B,STAT6,TCR,TLR4,TP53,ZAP70	ACOT2,ACSS2,ACY3,AK2,ANO10,ANPEP,AP3B1,ARL1,ARSB,ASS1,BCL2L1,BCLAF1,BHMT,CDK5RAP3,COPA,COPB1,COPB2,CPOX,CTBS,CTNNA2,CTSC,CTSH,CTSZ,DDB1,DDX25,DGUOK,DNASE2,EEF1A1,EIF3A,EIF4E,ELOVL5,FABP2,FADS2,FARS2,FHIT,FTL,GM2A,GPX4,GYS2,HDLBP,HGD,IGKC,ITGAV,KIAA0391,Krt10,KRT13,MAN2B2,MAVS,MGLL,MINOS1,MOGS,MRPL45,MRPL47,MRPL55,MTRR,Mup1 (includes others),NCL,NLN,NUTF2,OAT,OS9,PAICS,Pcmt1,PDK2,PECR,PEX1,PEX11A,…	138 (65)	62
9-keto-12-oxo-10-dodecenoic acid 2-lyso-phosphocholine ester	chemical - endogenous mammalian		3		-1.763	5.09e-14	9-keto-12-oxo-10-dodecenoic acid 2-lyso-phosphocholine ester,AKT1,CD44,CDH1,CDKN1B,Creb,CSF2RB,CTTN,DOK1,EGFR,HRAS,INPP5D,IRS2,JUN,LYN,MAP3K1,MAP4,MYD88,Nfat (family),NFKBIA,P38 MAPK,PDE3A,PLCG2,RAF1,SEPT5,SHC1,STAT3,STAT4,SYK/ZAP,TP53,ZAP70	ACP6,ACSS2,ACY3,AK2,ASS1,ATP5S,CELA1,CENPE,CKMT2,COPB1,COPB2,CPOX,CTSH,CTSZ,CXADR,DDB1,DDX25,Ear2 (includes others),EEF1A1,EIF4E,FABP2,FDXR,FTL,GLB1,GM2A,GUSB,HDLBP,HRAS,Ighg2b,IGKC,KCNMA1,KRT1,KRT13,MAN2B2,MGLL,MOGS,NCL,NLN,NUS1,NUTF2,OAT,Pcmt1,PCYT1A,PDK2,PEX1,PEX11A,PLD3,PLIN3,PSAP,PSMA1,RAB5A,RPL10,RPL12,RPL30,Rpl34 (includes others),Rpl36,RPL5,RPL7,RPL8,RPS10,RPS12,RPS16,RPS19,RPS20,RPS25,RP…	93 (31)	23					DOK1
AMPK	complex		2		0.583	6.41e-14	AKT1,AMPK,BECN1,CAV1,CDKN1B,CTNNB1,ELAVL1,ERK,ERK1/2,FOXO1,HDAC5,HNF4A,HRAS,INSR,Insulin,MAP2K3,MAPK1,MAPK14,MED1,MTOR,NOS2,P38 MAPK,PGR,PI3K (complex),PPARGC1A,PTGS2,RB1,SIRT1,TP53,TSC2	ACOT12,ACP6,ACSS2,ANPEP,ARG1,ARL1,ARSB,ASS1,BCLAF1,BHMT,CDK5RAP3,CENPE,CNP,COPB1,COPB2,CPOX,CREG1,CTBS,CTNNA2,CTSC,CTSH,CTSZ,DDX25,DPP7,EIF3A,ERMP1,ETNPPL,FABP2,FDXR,FHIT,FMO3,FTL,G6PC,GLA,GLB1,GUSB,HNRNPK,HPD,HRAS,IDE,Ighg2a,IGKC,KCNMA1,Krt10,KRT17,KRT18,KRT8,LYZ,MAVS,MRPL45,MRPL47,NCL,NEU1,NLN,OAT,Pcmt1,PCYT1A,PECR,PEX11A,PLIN3,PPT2,PRDX1,PRELP,PSAP,PSMA1,RAB5A,RALA,RPL10,RPL12,RPL27A,RPL30,Rpl…	106 (30)	30	(-)-arctigenin,2-deoxyglucose,4-coumaric acid,acadesine,amino acids,bardoxolone methyl,CDN1163,epigallocatechin-gallate,EPO,gamma-tocotrienol,GCG,genistein,guanidine,isoquercitrin,L-triiodothyronine,leucine,methotrexate,OPRD1,OSU-CG12,palmitic acid,pranlukast,PRKAA1,RAPGEF3,TCR,temozolomide,thiazolidinedione,troglitazone	AGT,ALOX5AP,benzyloxycarbonyl-Leu-Leu-Leu aldehyde,dehydroepiandrosterone sulfate,FNIP1,GIP,Ins1,methylphenazonium methosulfate,Nisch,NT5C1A,phosphocreatine,PLAUR,PML,sirolimus,tempol,vinorelbine		CDH1,CDKN1A,PTGS2,Tsc1-Tsc2	creatine kinase,ELAVL1,FASN,glycogen,HRAS,MLXIPL,SNAI1,SREBF1,TSC2,ZHX2
5,8,11,14-eicosatetraynoic acid	chemical reagent		3		0.878	6.61e-14	5,8,11,14-eicosatetraynoic acid,Akt,AKT1,BCL2,C3,CD247,Cdc42,CDH1,CDK2,Creb,CTNNB1,ERK,F2,F3,F7,FOXO1,IKZF1,INPP5D,MAPK14,MAPK9,MTOR,MYD88,Nfat (family),NFkB (complex),NFKBIA,nitric oxide,P38 MAPK,PI3K (complex),Pld,PLG,PTGS2,RAC1,RASGRF1,RELA,SHC1,STAT3,STAT5A,SYK,TICAM1,TP53,TRPM8,VAV1,VAV2,VAV3	ACY3,AK2,ASS1,ATP5S,BCL2L1,BGN,CDK5RAP3,CENPE,CNP,COPB1,CPOX,CTSA,CTSZ,CYP2S1,DDB1,Ear2 (includes others),EEF1A1,EIF3A,EIF4E,FABP2,FDXR,FHIT,FTL,G6PD,GLA,GLB1,GM2A,GPX4,GYS2,HDLBP,HRAS,Ighg2b,ISG15,ITGAV,KCNMA1,KRT1,Krt10,KRT13,KRT18,KRT5,KRT6B,KRT79,KRT8,LYZ,MAVS,MGLL,MRPL45,MRPL47,MRPL55,Mup1 (includes others),NCL,NUS1,OAT,Pcmt1,PCYT1A,PDK2,PEX1,PEX11A,PLD3,PLIN3,PRDX1,PSAP,PSMA1,RAB5A,RALA,RPL…	105 (44)	40					NFKBIA
trichloroethylene	chemical toxicant		3		-1.854	1.11e-13	BID,carbon tetrachloride,CASP1,CASP14,caspase,CD247,CD28,CD3,CREB1,CYP2E1,EGFR,EIF2AK2,EIF2S1,ESR1,ethanol,FOXO1,HNRNPK,HRAS,IRS2,Jnk,LCK,MAP3K1,MAPK1,MAPK14,MAPK8,Nfat (family),NFKBIA,P38 MAPK,PI3K (complex),PRKCD,RB1,SHC1,STAT3,STAT5A,TCR,trichloroethylene,VAV1,VAV3,ZAP70	AK2,ANO10,ANPEP,AP3B1,ARSB,BCL2L1,BCLAF1,BZW1,CDK5RAP3,CENPE,CKMT2,COL6A2,COPA,COPB2,CTSC,CTSH,CTSZ,CXADR,EIF4E,ETNPPL,FABP2,FDXR,FTL,GAA,GM2A,GPX4,GYS2,HAO2,HRAS,IGKC,KCNMA1,KIAA0391,Krt10,KRT18,KRT5,KRT8,LYZ,MAN2B2,MAVS,MGLL,MINOS1,MRPL45,MRPL47,MRPL55,MVP,NCL,NLN,NUS1,NUTF2,OS9,PCYT1A,PDXK,PEX1,PLD3,PLSCR1,PPT2,PRCP,PRELP,PSAP,RAB5A,RALA,RPL10A,RPL13A,RPL17,RPL18A,RPL22,RPL23,RPL3,RPL30,RPL31,…	105 (39)	37				CSNK2A1,PRLR	TXNIP
zopolrestat	chemical drug		3	Activated	3.746	1.2e-13	Akt,AKT1,APP,CCR2,Cdc42,CDKN1B,CEBPB,Creb,CREB1,CREM,CSF1,CTNNB1,EGFR,ERBB2,ERK,ERK1/2,ESR1,FOS,FOXO1,GAB1,GATA4,HIF1A,HOXA10,HRAS,HSF1,JAK2,JUN,KAT5,KLF4,L1CAM,LEPR,MAPK1,MAPK3,MCL1,MED1,NCOA1,NFE2L2,NFKBIA,NR4A1,P38 MAPK,p70 S6k,PI3K (complex),POU5F1,PPARA,PPARD,RAF1,RARA,RELA,RUNX1,SHC1,SIRT1,SP1,SREBF1,SREBF2,STAT4,STAT5A,STAT6,TP53,XBP1,zopolrestat	ABCD2,ACOT2,ACP6,ACY3,AGPAT3,AK2,ANO10,ANPEP,AP3B1,ARSB,ATP5S,BCL2L1,BCLAF1,BHMT,C8A,CDK5RAP3,CELA1,CELSR3,Ces1b/Ces1c,COPA,CPOX,CPT1A,CREG1,CTNNA2,CTSA,DDB1,DDX25,EEF1A1,EIF3A,EIF4E,ELOVL5,ERMP1,FADS2,FARS2,FDXR,FHIT,FTL,GAA,GLB1,GM2A,GYS2,HIST2H2AC,HPD,HRAS,IDE,Ighg2a,IGKC,ISG15,ITGAV,KCNMA1,KIAA0391,KRT1,Krt10,KRT13,KRT17,KRT5,MAVS,MINOS1,MOGS,MRPL45,MRPL47,MRPL55,MVP,NCL,NLN,NUTF2,OS9,PAICS,P…	138 (60)	58					MAPK3
antigen	group		3		-1.841	1.34e-13	ADAM17,Akt,AKT1,AMPK,antigen,Ap1,Ca2+,CD3,Cdc42,CDK9,CERK,CHRNA7,Creb,CREB1,CTNNB1,EGR1,ERK1/2,ERN1,Fcer1,FOS,GAB1,HRAS,HSF1,IFNG,IL2,ITPR,JUNB,LAG3,MAP2K3,MAP2K4,MAP3K1,MAPK1,MAPK11,MAPK12,MAPK13,MAPK14,MAPK9,Mek,MTOR,Nfat (family),NFkB (complex),NFKB1,NFKBIA,nitric oxide,NR4A1,P38 MAPK,PI3K (complex),RAC1,Raf,RAF1,RAS,REL,RELA,SHC1,SPHK1,SRF,STAT3,STAT4,STAT5A,STAT5B,TCR	ACP6,ACSS2,ACY3,AK2,ANPEP,ARL1,ARSB,ASS1,BCL2L1,BHMT,BZW1,Ces1b/Ces1c,CKMT2,CNP,COL6A2,COPB2,CTNNA2,CTSA,CTSH,DARS2,DDB1,EIF3A,EIF4E,FADS2,FARS2,FDXR,FHIT,FTL,G6PD,GAA,GARS,GLA,GUSB,GYS2,HDLBP,HRAS,IDE,Ighg2a,IGKC,Igkv1-117,KCNMA1,KIAA0391,KRT1,Krt10,KRT5,KRT6B,LYZ,MAN2B2,MGLL,Mup1 (includes others),NCL,NLN,NUS1,OAT,Pcmt1,PCYT1A,PDXK,PEX1,PEX11A,PLIN3,PPT2,PRCP,PRDX1,PRG2,RAB5A,RACK1,RPL10,RPL10A…	118 (61)	56				TCR
gossypol	chemical drug		3		-0.594	1.56e-13	26s Proteasome,AKT1,ATF4,BCL2,CCND1,CEBPA,CTNNB1,E2F1,EGFR,EIF4E,ERBB2,ERK1/2,ESR1,ESR2,genistein,gossypol,HIF1A,HNF4A,IGF1R,IL6,JUN,MAP2K1,MAP3K1,MAPK1,MAPK9,Mek,MSH2,MTOR,NANOG,NCOA1,NCOA3,NFKBIA,NOTCH1,NR5A2,P38 MAPK,PI3K (complex),PPARA,PPARG,SOX9,SRF,STAT3,THRB,TP53,TSC2	ABCD2,ACOT2,ACSS2,ACY3,AK2,ANO10,ANPEP,AP3B1,ARSA,ARSB,ATP5S,BCL2L1,BHMT,C8A,CELA1,CELSR3,CENPE,Ces1b/Ces1c,CKMT2,CNP,COL6A2,COPA,COPB1,CPOX,CPT1A,CTNNA2,CTSA,CTSC,CXADR,DGUOK,DNASE2,DPP7,EEF1A1,EIF3A,EIF4E,EIF5,ELOVL5,FABP2,FDXR,FMO3,FUCA1,G6PC,GAA,GALNS,GARS,GGH,GLB1,GUSB,HDLBP,HIST2H2AC,HNRNPK,HRAS,Ighg2b,IGKC,ISG15,ITGAV,KCNMA1,KIAA0391,Krt10,KRT18,KRT8,LYZ,MAN2B2,MANBA,MGLL,MINOS1,MOGS,Mup1 …	139 (44)	43				TP53
LRP8	transmembrane receptor		3		-1.145	1.66e-13	AHR,AKT1,AR,BAX,BID,CDK2,CDKN1B,CHUK,CLOCK,Creb,CREB1,CTNNB1,ERBB2,ERK1/2,ESR1,ESR2,ETS2,FOXO1,HIF1A,IGF1R,INPP5D,L-tyrosine,LRP8,MAP2K3,MAP2K4,MAPK1,MAPK14,MAPT,MTOR,N-cor,NFkB (complex),NFKB1,NFKBIA,NR4A1,PPARG,PTEN,Ptk,RAS,RELA,RUNX1,Sfk,SOX2,SP1,SPARC,STAT3,TCR,TNFSF11,TP53,TSC2	ACOT2,ACY3,AK2,AKAP1,ANO10,ANPEP,AP3B1,ARL1,ARSB,ASS1,ATP5S,BCL2L1,BCLAF1,BHMT,CDK5RAP3,CENPE,Ces1b/Ces1c,CKMT2,CNP,COPA,COPB1,CPOX,CREG1,CTNNA2,CTSC,CTSH,CTSZ,CXADR,DDX25,DPP7,EIF3A,ELOVL5,FADS2,FMO3,FRRS1,G6PC,GAA,GLA,GM2A,GPX4,GYS2,HDLBP,HIST2H2AC,HRAS,Ighg2b,KRT1,Krt10,KRT5,MAVS,MGLL,MINOS1,MRPL45,MRPL47,MRPL55,Mup1 (includes others),NEU1,OS9,PAICS,Pcmt1,PCYT1A,PDK2,PDXK,PECR,PEX1,PEX11A,PLD3…	129 (49)	45				selenium
PRKAA	group		2		1.555	1.76e-13	26s Proteasome,Akt,AKT1,ERK,FASN,FOXO1,HIF1A,HSF1,Jnk,MTOR,NR3C1,PPARGC1A,PRKAA,RAF1,SIRT1,SREBF1,STIM1,TP53,TSC1,TSC2	ACSS2,ARG1,ASS1,ATP5S,BCLAF1,BGN,CDK5RAP3,CENPE,Ces1b/Ces1c,CNP,COL6A2,COPB1,CPOX,CPT1A,CREG1,CTSA,CTSH,CXADR,DPP7,EEF1A1,EIF3A,EIF4E,ERMP1,FADS2,FDXR,FHIT,G6PC,G6PD,GLA,HDLBP,HIST2H2AC,HRAS,Ighg2a,KCNMA1,KIAA0391,KRT18,KRT8,LYZ,MAVS,MGLL,MRPL45,MRPL47,MRPL55,MVP,NEU1,Pcmt1,PCYT1A,PEX11A,PLSCR1,PRDX1,PRELP,PSAP,PSMA1,RNASET2,RPL10,RPL12,RPL22,RPL23,Rpl34 (includes others),Rpl36,RPL5,RPL7,RPS12,RP…	93 (20)	20	(Z)-5-(3-trifluoromethylbenzylidene)thiazolidine-2,4-dione,2-deoxyglucose,ADIPOQ,C1QL3,citrulline,GFPT1,Insulin,ITPR3,L-triiodothyronine,mannitol,MYC,policosanol,PRKAA1,PTGS2,RSVA314,RSVA405,troglitazone	AGT,CAT,ELOVL5,palmitic acid,phosphocreatine,PPP2CB,PPP2R1B,RAS,SLC13A5,VHL		ACOX1,CDH1,CDKN1A,PPP2R5C	FASN,PRKACA,SNAI1,SREBF1,TSC2
SEMA3E	other		3		1.386	1.85e-13	AKT1,ARF6,Cdc42,CDH1,CTNNB1,EGFR,ERK,ERK1/2,ESR1,HIF1A,HRAS,JUN,MAP3K1,MAPK1,MAPK11,MAPK14,Mek,NFAT5,PI3K (complex),PLA2G4A,RAC1,SEMA3E,SRF,STAT1,STAT3,TP53	ACSS2,ANO10,ANPEP,AP3B1,ARG1,ARSB,ATP5S,BCLAF1,BHMT,CENPE,Ces1b/Ces1c,CKMT2,COL6A2,COPA,COPB1,COPB2,CPOX,CTNNA2,CTSA,CTSC,CTSZ,CXADR,DDB1,EEF1A1,EIF4E,FABP2,G6PD,GLB1,GUSB,HDLBP,HIST2H2AC,HRAS,IGKC,Igkv1-117,ISG15,KIAA0391,Krt10,KRT13,KRT18,KRT6B,KRT8,MAN2B2,MINOS1,MOGS,Mup1 (includes others),NCL,NLN,NUTF2,OS9,Pcmt1,PCYT1A,PDK2,PEX1,PEX11A,PPT2,PRDX1,PRG2,PSAP,PSMA1,RALA,RPL10,RPL12,RPL23,RPL27A,…	102 (26)	25	FOS				RAC1
PDE2A	enzyme		3		-1.311	1.92e-13	ADCY,AKT1,AMPK,Cdc42,CDH1,Creb,CTNNB1,cyclic AMP,EGFR,ERK,ERK1/2,ESR1,HIF1A,HRAS,JUN,MAP3K1,MAPK1,MAPK11,MAPK14,Mek,NFAT5,NFkB (complex),P38 MAPK,PDE2A,PI3K (complex),PLA2G4A,RAC1,RELA,SRF,STAT1,STAT3,STK11,TP53,TRPM8	ACP6,ACSS2,ACY3,AK2,ANO10,ANPEP,AP3B1,ARG1,ARSB,ATP5S,BCLAF1,BGN,BHMT,CENPE,Ces1b/Ces1c,CKMT2,COL6A2,COPA,COPB1,COPB2,CPOX,CTNNA2,CTSA,CTSC,CTSZ,CXADR,DDB1,EEF1A1,EIF3A,EIF4E,FABP2,G6PD,GLA,GLB1,GPX4,GUSB,HDLBP,HIST2H2AC,HRAS,IGKC,Igkv1-117,KIAA0391,KRT1,Krt10,KRT13,KRT18,KRT6B,KRT8,MAN2B2,MINOS1,MOGS,Mup1 (includes others),NCL,NLN,NUTF2,OS9,Pcmt1,PCYT1A,PDK2,PEX1,PEX11A,PLIN3,PPT2,PRDX1,PRG2,PSA…	114 (34)	32	TP53	AURK		RAC1
DOCK4	other		3		-1.323	2.29e-13	Akt,AKT1,Cdc42,CDH1,CTNNB1,DOCK4,EGFR,ERK,ERK1/2,ESR1,Focal adhesion kinase,HIF1A,HRAS,JUN,MAP3K1,MAPK1,MAPK11,MAPK14,Mek,NFAT5,NFkB (complex),P38 MAPK,PI3K (complex),RAC1,RAF1,Rap,RASSF5,RELA,SRF,STAT1,STAT3,TP53	ACSS2,ANO10,ANPEP,AP3B1,ARG1,ARSB,ASS1,ATP5S,BCLAF1,BGN,BHMT,BZW1,CENPE,Ces1b/Ces1c,CKMT2,COL6A2,COPA,COPB1,COPB2,CPOX,CPT1A,CTNNA2,CTSA,CTSC,CTSZ,CXADR,DDB1,EEF1A1,EIF4E,FABP2,FHIT,G6PD,GLA,GLB1,GUSB,HDLBP,HIST2H2AC,HRAS,IGKC,Igkv1-117,Krt10,KRT13,KRT6B,KRT8,MAN2B2,MGLL,MINOS1,MOGS,Mup1 (includes others),MVP,NCL,NLN,NUTF2,OS9,Pcmt1,PCYT1A,PDK2,PEX1,PEX11A,PPT2,PRDX1,PRG2,PSAP,PSMA1,RAB5A,RALA,RP…	112 (32)	31		DDIT3,PRKAA1		RAC1,Rap
RADIL	other		3		0.29	2.84e-13	ADAM17,Akt,AKT1,CCND1,Cdc42,CHUK,CREB1,CTNNB1,EGFR,ERK,ERK1/2,HIF1A,IGF1R,IL6,IRS2,ITGB1,ITGB2,MAP2K1,MAPK1,MAPK14,MAPK9,MTOR,MYD88,NFkB (complex),P38 MAPK,PI3K (complex),PTEN,PTK2,RADIL,RAS,SHC1,STAT6,TP53,TSC2	AKAP1,ANPEP,ARSB,ASS1,ATP5S,BCL2L1,BCLAF1,BGN,BHMT,CENPE,Ces1b/Ces1c,CKMT2,CNP,COL6A2,COPB1,CPOX,CREG1,CTNNA2,CTSA,CTSZ,DPP7,Ear2 (includes others),EEF1A1,EIF3A,EIF4E,EIF5,FHIT,FTL,G6PD,GAA,GLA,GLB1,GM2A,GUSB,HDLBP,HIST2H2AC,HRAS,Ighg2b,ITGAV,KCNMA1,KIAA0391,KRT1,KRT5,Mup1 (includes others),NCL,NUTF2,Pcmt1,PCYT1A,PDK2,PDXK,PECR,PEX11A,PLD3,PPT2,PRCP,PRDX1,PRELP,PSAP,PSMA1,RAB5A,RPL10,RPL12,RPL13,…	107 (34)	33				PTK2
TCR	complex		1	Inhibited	-3.922	3.06e-13	TCR	BCL2L1,EIF4E,RPL10A,RPL13A,RPL17,RPL18A,RPL22,RPL3,RPL30,RPL31,RPL38,RPL4,RPL5,RPL6,RPL7,RPL9,RPLP0,RPS13,RPS15,RPS16,RPS17,RPS2,RPS23,RPS3,RPSA,TALDO1	26 (1)	1	antigen,MHC			AMPK,ARHGDIB,Cdc42,FOS,GAB1,GADD45B,HRAS,HSP90B1,HSPA5,IL16,MAPK11,MAPK12,MAPK3,MYC,NFKBIA,PIK3CB,PTK2,RAC1,RAS,RASA1,Sos,SPP1,WAS	CDH1,IRS2
Ldh (complex)	complex		3		-0.105	3.37e-13	AKT1,AMPK,CASP1,CAT,EGFR,ERK1/2,FOXO1,glutathione peroxidase,GPX1,HSF1,hydrogen peroxide,INSR,JAK2,Jnk,Ldh (complex),MAPK1,Nfat (family),NFKBIA,P38 MAPK,PRKAA,STAT3,TP53	ACOT2,ACSS2,AK2,ANPEP,ARG1,ARSB,BGN,BHMT,CDK5RAP3,CENPE,Ces1b/Ces1c,COPB1,CPOX,CTNNA2,CTSH,EIF4E,FDXR,GLB1,GPX4,HDLBP,HRAS,IDE,KCNMA1,KIAA0391,LYZ,MAVS,MRPL45,MRPL47,MRPL55,NCL,NUS1,NUTF2,OAT,Pcmt1,PDK2,PECR,PEX1,PEX11A,PLSCR1,PPT2,PRDX1,PSAP,PSMA1,RAB5A,RPL10,RPL12,RPL21,RPL22,RPL27A,RPL31,Rpl34 (includes others),Rpl36,RPL5,RPL7,RPL7A,RPL8,RPS12,RPS16,RPS19,RPS2,RPS20,RPS25,RPS26,RPS27L,RPS3,RPS…	91 (22)	20	Insulin,oleic acid,OPRD1,oxadiazon,PTGS2	bromobenzene,cadmium,cocaine,NFE2L2,nicotinic acid,sirolimus		CAT
CYP	group		3		-1.961	3.89e-13	acetaminophen,AHR,AKT1,ATP2A2,benzo(a)pyrene,CASP1,CAV1,CREB1,CTNNB1,cyclophosphamide,CYP,CYP1B1,CYP2C8,DIO3,ERK,halothane,HRAS,INSR,isoflurane,JUN,KCNK9,MAPK1,MAPK9,methimazole,NFE2L2,NR1I2,paclitaxel,PI3K (complex),RAF1,RELA,TP53	ABCD2,ACOT2,ACSS2,AGPAT3,ANPEP,ARSB,ASS1,ATP5S,BCL2L1,BGN,CELA1,CENPE,Ces1b/Ces1c,CKMT2,COL6A2,COPB1,COPB2,CPOX,CREG1,DDB1,EEF1A1,EIF4E,FDXR,FMO3,FTL,G6PD,GAA,GLB1,HDLBP,HRAS,IDE,IGKC,KCNMA1,KIAA0391,KRT8,LYZ,MOGS,Mup1 (includes others),Nat8f2,NCL,NLN,Nnt,OAT,Pcmt1,PCYT1A,PDK2,PDXK,PECR,PEX11A,PLIN3,PPT2,PRCP,PRDX1,PSAP,PSMA1,PSMD13,RACK1,RALA,RPL10,RPL12,RPL23,RPL27A,RPL30,Rpl34 (includes others…	104 (31)	27	3-methylcholanthrene,AGT,CYP1A1,diethylnitrosamine,genistein	clotrimazole,coumarin,MYC,NCX-4040,xanthohumol		NQO1
niflumic acid	chemical drug		3		0.202	4.88e-13	Akt,AKT1,Cdc42,Creb,EGFR,ERBB2,ERK,ERK1/2,IGF1R,Jnk,MDM2,NADPH oxidase,niflumic acid,P38 MAPK,PI3K (complex),PLA2G1B,PPARA,PPARG,PTEN,PTGS2,SP1,STK11,TP53	ABCD2,ACOT2,ACP6,ACSS2,ACY3,AK2,AKAP1,ATP5S,BCL2L1,BGN,BHMT,C8A,CENPE,Ces1b/Ces1c,CKMT2,COL6A2,COPB1,CPOX,CTSA,CTSZ,EEF1A1,EIF3A,EIF4E,ELOVL5,FABP2,FADS2,FHIT,G6PD,GLB1,HDLBP,HPD,HRAS,ISG15,ITGAV,KCNMA1,KIAA0391,KRT1,Krt10,KRT18,KRT5,LYZ,MGLL,Mup1 (includes others),MVP,NCL,NEU1,NUTF2,OAT,PAICS,Pcmt1,PCYT1A,PDK2,PECR,PEX11A,PLIN3,PLSCR1,PSAP,PSMA1,RAB5A,RPL10,RPL12,RPL17,RPL23,Rpl34 (includes othe…	98 (23)	20					PTGS2
ciprofibrate	chemical drug		3		-0.567	6.2e-13	ACOX1,AKT1,AMPK,Ap1,CAT,CEBPA,ciprofibrate,CYP27A1,EGFR,FOXO1,HNF4A,HSF1,hydrogen peroxide,IKBKB,INSR,JAK2,JUN,MAPK1,Nfat (family),NFkB (complex),NFKBIA,P38 MAPK,PPARA,PPARG,PRKAA,RB1,RELA,SMAD4,STAT3,THRB,TP53	ABCD2,ACOT2,ACSS2,AK2,ARG1,ARSB,ASS1,BCL2L1,BGN,C8A,CDK5RAP3,CENPE,Ces1b/Ces1c,COPB1,CPOX,CPT1A,CREG1,CTBS,CTNNA2,CTSH,CTSZ,EIF4E,ELOVL5,FABP2,FADS2,FDXR,FMO3,G6PC,G6PD,GGH,GLA,GM2A,GPX4,HDLBP,HPD,HRAS,IDE,KCNMA1,KIAA0391,KRT6B,KRT8,LYZ,MAVS,MGLL,MOGS,MRPL45,MRPL47,MRPL55,Mup1 (includes others),Nat8f2,NCL,NUS1,NUTF2,OAT,Pcmt1,PDK2,PECR,PEX1,PEX11A,PLD3,PLSCR1,PPT2,PRDX1,PSMA1,RAB5A,RPL10,RPL12,RP…	112 (31)	30				8-oxo-7-hydrodeoxyguanosine,ACOX1,CAT,EHHADH,HSD17B4,Kap,NFKBIA,PPARA,RBM3	D-glucose,Ins1,Mup1 (includes others)
PKC (α,ε,θ)	group		3		-0.548	6.48e-13	ADRB2,AKT1,Ap1,BCAR1,BCL2,CDKN1B,CHUK,Creb,CREB1,EGFR,EIF4E,ELAVL1,ERK1/2,ESR1,ESRRA,FGFR2,FOS,HMGA1,IKBKB,INSR,JAK2,JUN,MAPK1,MAPK9,MITF,NANOG,Nfat (family),NFkB (complex),NFKB1,NFKBIA,NRIP1,OGG1,P38 MAPK,PI3K (complex),PKC (α,ε,θ),PPARA,PRKCA,PRKCE,PRKCQ,RAC1,RAF1,RB1,RELA,RPS6KA1,SHC1,SPI1,SRF,STK11,THOC5,TP53,TP73,TSC2	ABCD2,ACP6,ACY3,AP3B1,ARSB,ATP5S,BCLAF1,BHMT,C8A,CKMT2,COPA,COPB1,COX20,CPOX,CREG1,CTNNA2,CTSZ,CXADR,DDX25,DGUOK,DPP7,EEF1A1,EIF3A,EIF4E,ELOVL5,FADS2,FARS2,FDXR,FTL,GAA,GLA,GM2A,HDLBP,HPD,IDE,Ighg2b,Igkv1-117,KCNMA1,KIAA0391,KRT1,Krt10,KRT13,KRT6B,MGLL,MINOS1,MOGS,MRPL55,Mup1 (includes others),NCL,NEU1,NUS1,NUTF2,OAT,OPLAH,OS9,Pcmt1,PDK2,PDXK,PECR,PEX11A,PLD3,PLIN3,PRCP,PRELP,PRG2,PSAP,PSMA1,RAB5…	120 (52)	47
8-oxo-7-hydrodeoxyguanosine	chemical - endogenous mammalian		3		1.223	7.36e-13	8-oxo-7-hydrodeoxyguanosine,Akt,AKT1,AR,BCAR1,Cdc42,CDH1,CEBPA,CHUK,EGFR,EIF2S1,ERK,ESR1,FOS,HIF1A,HRAS,JAK2,JUN,MAP3K1,MAPK1,MAPK11,MAPK14,Mek,mir-21,NFAT5,P38 MAPK,PI3K (complex),PLA2G4A,RAC1,RELA,SRF,STAT3,TP53,TP63	ACSS2,ANO10,ANPEP,AP3B1,ARSB,ASS1,ATP5S,BCL2L1,BCLAF1,CENPE,Ces1b/Ces1c,CKMT2,COL6A2,COPA,COPB1,COPB2,CPOX,CPT1A,CREG1,CTNNA2,CTSA,CTSC,CTSZ,CXADR,DDB1,EEF1A1,EIF4E,FABP2,FARS2,FHIT,G6PD,GGH,GLB1,GM2A,GUSB,HDLBP,HIST2H2AC,HRAS,IGKC,Igkv1-117,ISG15,KIAA0391,KRT1,Krt10,KRT13,KRT18,KRT6B,LYZ,MAN2B2,MINOS1,MOGS,NCL,NLN,NUTF2,OS9,Pcmt1,PCYT1A,PDK2,PEX1,PEX11A,PLD3,PPT2,PRDX1,PRG2,PSAP,PSMA1,RAB5A,RALA…	113 (34)	33	ciprofibrate,clofibric acid,pirinixic acid,stavudine	gamma-tocotrienol,NFE2L2			PTGS2,RAC1
colcemid	chemical - endogenous non-mammalian		3		-1.732	7.76e-13	AKT1,CCND1,CDKN1B,CDKN2A,CEBPA,CEBPB,colcemid,Creb,CREB1,CREM,CSF1,CTNNB1,E2F1,EGFR,EIF4E,ERBB2,ERK,ESR1,FOS,HNF4A,HSF1,IGF1R,IL6,KAT5,KLF4,MAPK1,MAPK3,MCL1,MED1,Mek,MSH2,MTOR,NANOG,NCOA1,NFE2L2,NFkB (complex),NFKBIA,NR4A1,PGR,PI3K (complex),POU5F1,RAF1,RARA,RB1,SHC1,SREBF1,SREBF2,TP53,TSC2,XBP1	ACP6,ACSS2,AGPAT3,AK2,ANO10,ANPEP,AP3B1,ARSB,ATP5S,BCL2L1,CELA1,CELSR3,CENPE,Ces1b/Ces1c,CKMT2,CNP,COL6A2,COPA,COPB1,COPB2,CPOX,CPT1A,CTBS,CTNNA2,CTSH,DDB1,DDX25,DGUOK,DPP7,EEF1A1,EIF3A,EIF5,FADS2,FARS2,FDXR,FMO3,FTL,G6PC,GGH,GLA,GLB1,GM2A,HDLBP,HNRNPK,HPD,HRAS,IDE,IGKC,ITGAV,KCNMA1,KIAA0391,Krt10,KRT13,KRT17,KRT18,KRT8,LYZ,MINOS1,MRPL55,Mup1 (includes others),MVP,NEU1,NUTF2,OAT,OS9,PAICS,Pcmt1,P…	147 (50)	48				MAPK3,TP53	CYP1A1,NQO1
KNDC1	other		3	Inhibited	-2.687	8.34e-13	Akt,AKT1,Ap1,Cdc42,CDH1,CHUK,Creb,ERK,ERK1/2,ETS2,FOS,HRAS,IKBKB,JUN,KNDC1,MAP2,MAP2K3,MAP3K1,MAPK1,MAPK14,Mek,NFkB (complex),P38 MAPK,p70 S6k,PI3K (complex),PTK2,RAC1,Raf,RAF1,RALGDS,RB1,RELA,SMAD3,TP53,TP73	ACSS2,ACY3,ANPEP,ARL1,ARSB,ASS1,ATP5S,BCL2L1,BGN,BHMT,CENPE,CKMT2,COL6A2,COPB1,COPB2,CPOX,CTSA,CTSH,CTSZ,DDB1,EEF1A1,FABP2,FARS2,FDXR,FHIT,G6PD,GLB1,GM2A,GUSB,HDLBP,IGKC,KCNMA1,KIAA0391,KRT1,KRT13,KRT18,KRT6B,KRT8,MAN2B2,MGLL,MOGS,MRPL55,NLN,OAT,Pcmt1,PCYT1A,PDK2,PEX11A,PLD3,PLIN3,PPT2,PRDX1,PSAP,PSMA1,RAB5A,RALA,RPL10,RPL12,RPL23,RPL27A,RPL30,Rpl34 (includes others),Rpl36,RPL5,RPL7,RPL9,RPLP0,RP…	101 (35)	33				HRAS
SKLB1028	chemical drug		3	Activated	2.01	9.08e-13	ABL1,AGT,Akt,AKT1,APP,Cdc42,CDKN1B,Creb,CREB1,CTNNB1,EGFR,EGR1,EPB41,ERBB2,ERK,ERK1/2,ESR1,FLT3,FOS,FOXO1,FOXO3,GAB1,GPX1,HIF1A,HRAS,ITCH,JAK2,JINK1/2,JUN,KAT5,KRAS,MAP3K1,MAPK1,MAPK9,Mek,MTOR,NFAT5,NFKBIA,P38 MAPK,PGR,PI3K (complex),RAS,SHC1,SKLB1028,SOCS3,SP1,STAT3,STAT5A,STAT5B,STAT6,TP53,TP63,TP73	ACSS2,ACY3,AK2,ANO10,ANPEP,AP3B1,ARG1,ARSB,ASS1,ATP5S,BCL2L1,BCLAF1,BHMT,CDK5RAP3,CNP,COL6A2,COPA,COPB1,COPB2,CTBS,CTNNA2,CTSA,CTSC,CTSH,CTSZ,DDB1,DDX25,EEF1A1,EIF3A,EIF4E,EIF5,FARS2,FHIT,FTL,G6PD,GM2A,GPX4,GUSB,GYS2,HDLBP,HIST2H2AC,HRAS,Ighg2b,IGKC,KIAA0391,KRT1,Krt10,KRT17,KRT5,MAN2B2,MAVS,MINOS1,MOGS,MRPL45,MRPL47,MRPL55,MTRR,Mup1 (includes others),NCL,NLN,NUTF2,OS9,PAICS,Pcmt1,PCYT1A,PDK2,PDX…	131 (53)	50
cadmium	chemical toxicant		2		-1.891	9.87e-13	Akt,cadmium,E2F1,ERK1/2,ESR1,estrogen receptor,MAP2K1,MAPK1,NFE2L2,P38 MAPK,RAF1,TP53	ACSS2,AGPAT3,ANO10,ANPEP,AP3B1,ARSB,ASS1,ATP5S,BCL2L1,BCLAF1,BGN,BHMT,CELA1,Ces1b/Ces1c,CKMT2,COPA,COPB1,CPOX,CREG1,CTNNA2,CTSC,CTSH,CXADR,EEF1A1,FDXR,FHIT,FTL,G6PC,G6PD,GLB1,GUSB,HNRNPK,HRAS,IDE,ITGAV,KCNMA1,KIAA0391,KRT1,Krt10,KRT17,KRT8,LYZ,MGLL,MINOS1,MOGS,MVP,OAT,OS9,Pcmt1,PDK2,PECR,PPT2,PRDX1,PSAP,PSMA1,PSMD13,RAB5A,RACK1,RPL10,RPL12,Rpl34 (includes others),Rpl36,RPL5,RPL7,RPLP0,RPS12,RPS16…	101 (12)	12				CCND1,CDKN1A,HSPA5,MYC,NFE2L2,PTGS2,TP53	CAT,EPO,Ldh (complex)
RDX	other	1.118	3		1.976	1.02e-12	Akt,AKT1,BCL2,Cdc42,CDH1,CTNNB1,EGFR,ERK,ERK1/2,ESR1,estrogen receptor,HIF1A,HRAS,Insulin,JUN,MAP3K1,MAPK1,MAPK11,MAPK12,MAPK13,MAPK14,MAPK9,Mek,NFAT5,NFkB (complex),P38 MAPK,PAK1,PI3K (complex),RAC1,RAF1,RDX,RELA,SRF,STAT1,STAT3,TP53	ACOT12,ACSS2,ANO10,ANPEP,AP3B1,ARG1,ARSB,ASS1,ATP5S,BCLAF1,BGN,BHMT,CENPE,Ces1b/Ces1c,CKMT2,COL6A2,COPA,COPB1,COPB2,CPOX,CPT1A,CTNNA2,CTSA,CTSC,CTSZ,DDB1,EEF1A1,EIF4E,FABP2,FADS2,FHIT,FTL,G6PD,GLA,GLB1,HDLBP,HIST2H2AC,HNRNPK,HRAS,IDE,Ighg2b,IGKC,Igkv1-117,KIAA0391,Krt10,KRT13,KRT6B,MAN2B2,MGLL,MINOS1,MOGS,Mup1 (includes others),NCL,NLN,NUTF2,OS9,Pcmt1,PCYT1A,PEX1,PEX11A,PLIN3,PPT2,PRDX1,PRG2,PSAP…	113 (36)	34	GNA12				RAC1
ARHGDIB	enzyme		3		0.392	1.1e-12	Akt,AKT1,ARHGDIB,Cdc42,CDH1,CTNNB1,EGFR,ESR1,HIF1A,HRAS,JUN,MAP3K1,MAPK1,MAPK11,MAPK14,Mek,NFAT5,NFkB (complex),NFKB1,NFKBIA,Pkc(s),PLC gamma,RAC1,RAF1,RELA,SRF,STAT1,STAT3,TP53	ACSS2,AK2,ANO10,ANPEP,AP3B1,ARG1,ARSB,ATP5S,BCLAF1,CENPE,Ces1b/Ces1c,CKMT2,COL6A2,COPA,COPB1,COPB2,CPOX,CPT1A,CTNNA2,CTSA,CTSC,CTSZ,CXADR,DDB1,EEF1A1,EIF4E,FABP2,GLA,GLB1,GM2A,GUSB,HDLBP,HIST2H2AC,HRAS,IGKC,Igkv1-117,Krt10,KRT13,KRT6B,KRT8,MAN2B2,MGLL,MINOS1,MOGS,Mup1 (includes others),NCL,NLN,NUTF2,OS9,Pcmt1,PCYT1A,PDK2,PEX1,PEX11A,PLD3,PPT2,PRDX1,PRG2,PSAP,PSMA1,RALA,RPL10,RPL12,RPL30,Rpl34 (in…	104 (29)	27	TCR	CD 437,KDM1A,PRKAA1,sirolimus		PTGS2	RAC1
arachidonic acid	chemical - endogenous mammalian		2		-1.106	1.22e-12	Akt,AKT1,ALOX5,arachidonic acid,AREG,ERK,ERK1/2,Focal adhesion kinase,FOS,HSF1,MAPK1,MAPK14,NFE2L2,P38 MAPK,PI3K (complex),PPARA,PPARG,PTGS1,PTGS2,SREBF1,TP53,TRPM8	ABCD2,ACOT2,AGPAT3,ANPEP,ARSB,ATP5S,BGN,BHMT,C8A,CELA1,CENPE,Ces1b/Ces1c,CKMT2,COL6A2,COPB1,CPOX,CREG1,CTNNA2,CTSH,CXADR,EEF1A1,ELOVL5,FABP2,FADS2,FARS2,FDXR,FHIT,FTL,G6PD,GPX4,HDLBP,HPD,HRAS,IDE,ITGAV,KCNMA1,Krt10,KRT17,LYZ,MGLL,MOGS,OAT,Pcmt1,PCYT1A,PDK2,PPT2,PRDX1,PSAP,PSMA1,PSMD13,RAB5A,RACK1,RNASET2,RPL10,RPL12,RPL22,RPL23,Rpl34 (includes others),Rpl36,RPL5,RPL7,RPL9,RPS12,RPS16,RPS19,RPS20,…	99 (22)	22	10-shogaol,ADORA1,ELOVL5,MYC,PRL,TRH,Zingiber officiale ginger extract	CFTR,HINT1,sirolimus		ACOX1,ALOX5,EPHB1,FABP1,Focal adhesion kinase,FOS,MAPK3,NFE2L2,PPARA,PTGS2,TP53,TSH	ELOVL2,FASN,INSIG2,NFKBIA,palmitic acid,SREBF1
WAS	other		3		-0.296	1.27e-12	Akt,Ap1,Arp2/3,BCAR1,CCND1,Cdc42,CHUK,CSF2,ERK,ERK1/2,Focal adhesion kinase,FOS,HRAS,IL2,JUN,MAP3K1,MAPK1,MAPK12,MAPK14,MRTFA,NFAT (complex),Nfat (family),NFAT5,NFkB (complex),NFKB1,P38 MAPK,PI3K (complex),PPARG,RAF1,RELA,RHOA,SRF,STAT3,Tgf beta,TP53,WAS	ACSS2,ANPEP,ARG1,ARSB,ASS1,ATP5S,BCL2L1,BCLAF1,BHMT,Ces1b/Ces1c,CKMT2,COL6A2,COPB1,COPB2,CPOX,CTNNA2,CTSA,CTSC,CTSZ,DARS2,EEF1A1,EIF5,FABP2,FARS2,FHIT,G6PD,GARS,GLA,GLB1,GM2A,HDLBP,HRAS,Ighg2b,IGKC,Igkv1-117,KCNMA1,KIAA0391,KRT6B,KRT72,KRT8,MAN2B2,MOGS,NLN,NUS1,OAT,Pcmt1,PCYT1A,PDK2,PEX1,PEX11A,PLA2G15,PLD3,PPT2,PRDX1,PRG2,PSAP,PSMA1,RAB5A,RALA,RPL12,RPL13,RPL21,RPL23,RPL27A,RPL30,Rpl34 (includes…	103 (36)	33	benzyloxycarbonyl-Leu-Leu-Leu aldehyde,Cdc42,RAC1,TCR
MAPK12	kinase		2		0.853	1.5e-12	CCND3,DDIT3,EGFR,EIF4E,ERK1/2,estrogen receptor,FOS,KAT5,MAPK12,MKNK1,MKNK2,MYOD1,NFE2L2,TP53	ACSS2,AGPAT3,ARG1,ASS1,ATP5S,BCLAF1,CELA1,CENPE,Ces1b/Ces1c,CKMT2,COPB1,CPOX,CPT1A,CREG1,CTSH,DDB1,DGUOK,EEF1A1,EIF4E,FARS2,FDXR,FTL,G6PD,GLB1,HDLBP,HRAS,IDE,Igkv1-117,ISG15,ITGAV,KCNMA1,KIAA0391,KRT17,KRT6B,KRT8,LYZ,MGLL,MOGS,MVP,NCL,NUTF2,OAT,Pcmt1,PDK2,PRDX1,PSAP,PSMD13,RACK1,RPL10,RPL12,Rpl34 (includes others),Rpl36,RPL5,RPL7,RPL7A,RPL9,RPS12,RPS18,RPS19,RPS20,RPS24,RPS25,RPS26,RPS27L,RPS3,RP…	88 (14)	14	HRAS,Insulin,KRAS,MAP2K6,MAP3K5,TCR	carrageenan,sirolimus		DDIT3,FOS	CCND1,NFE2L2
calpeptin	chemical reagent		3		-0.173	1.68e-12	AKT1,AR,BCAR1,Calcineurin protein(s),calpeptin,CASP3,CCND1,CD247,Cdc42,CDKN1B,CDKN2A,CEBPA,CEBPB,E2F1,EIF4E,FOS,FOXO1,HIF1A,HNF4A,HRAS,HSF1,IGF1R,IL18,IL6,INSR,Insulin,JAK2,JUN,KAT5,KLF4,LEPR,MAP2K3,MAPK1,MAPK3,MED1,MRTFA,MTOR,MYD88,N-cor,NANOG,NCOA1,Nfat (family),NFE2L2,NFKBIA,NR4A1,PGR,PTEN,PTPN1,PTPRA,RHOA,SREBF1,SRF,TNFSF11,TP53,XBP1	ACOT12,ACP6,ACSS2,AGPAT3,AK2,AKAP1,ANPEP,ARL1,ARSB,ASS1,ATP5S,CDK5RAP3,CELA1,CELSR3,CENPE,Ces1b/Ces1c,CKMT2,CNP,COL6A2,COPB1,COPB2,CPOX,CPT1A,CTBS,CTNNA2,CTSA,CTSH,CTSZ,DDB1,DDX25,DGUOK,Ear2 (includes others),EEF1A1,EIF3A,EIF5,ELOVL5,FARS2,FDXR,FMO3,FRRS1,GGH,GLB1,GM2A,HDLBP,HIST2H2AC,HNRNPK,HPD,HRAS,Igkv1-117,KCNMA1,KRT13,KRT17,KRT8,LYZ,MAVS,MOGS,MRPL45,MRPL47,NLN,NUS1,OAT,Pcmt1,PDK2,PECR,PEX11A…	134 (55)	50				TP53	MAPK3,NFKBIA,PTK2
ARAP1	other		3		-0.992	1.77e-12	AGT,Akt,AKT1,Ap1,ARAP1,CDC42,Cdc42,CDH1,Creb,CREB1,CTNNB1,EGFR,EGR1,EPB41,ERBB2,ERK,ERK1/2,FOS,FOXO1,FOXO3,HIF1A,HRAS,ITCH,JAK2,JUN,KRAS,MAP2K3,MAP2K4,MAP2K6,MAP3K1,MAPK1,MAPK11,MAPK14,Mek,Nfat (family),NFkB (complex),NFKBIA,P38 MAPK,PGR,PI3K (complex),RAC1,RAF1,RAS,RB1,SHC1,SP1,SRF,STAT3,STAT5B,STAT6,TP53	ACSS2,ACY3,AK2,ANPEP,ARG1,ARL1,ARSB,ASS1,ATP5S,BCL2L1,BHMT,CDK5RAP3,CENPE,Ces1b/Ces1c,CKMT2,COL6A2,COPB1,COPB2,CPOX,CTBS,CTNNA2,CTSA,CTSZ,CXADR,DDB1,EIF4E,EIF5,FARS2,FHIT,FTL,G6PD,GLA,GLB1,GM2A,GUSB,HDLBP,HIST2H2AC,Ighg2b,IGKC,Igkv1-117,KCNMA1,KIAA0391,KRT1,KRT13,KRT17,KRT6B,MAN2B2,MAVS,MOGS,MRPL45,MRPL47,MRPL55,MTRR,Mup1 (includes others),NCL,NLN,NUS1,NUTF2,PAICS,Pcmt1,PCYT1A,PDK2,PDXK,PEX1,PLD3…	123 (51)	49
GPR68	G-protein coupled receptor		3		0.647	1.91e-12	Akt,Cdc42,CDH1,Creb,EGFR,ERK1/2,ESR1,GPR68,HIF1A,HRAS,Nfat (family),NFAT5,RAC1,Ras homolog,RELA,ROCK2,STAT1,TP53	ACSS2,ACY3,ANO10,AP3B1,ARG1,ATP5S,BCLAF1,BHMT,CENPE,CKMT2,COL6A2,COPA,COPB1,COPB2,CPOX,CPT1A,CTSA,CTSC,CTSZ,CXADR,DDB1,EEF1A1,EIF4E,FABP2,GLB1,GUSB,HDLBP,HIST2H2AC,HRAS,IGKC,ITGAV,KIAA0391,KRT1,Krt10,KRT13,KRT6B,MINOS1,NCL,NLN,NUS1,NUTF2,OS9,Pcmt1,PCYT1A,PDK2,PLIN3,PSAP,PSMA1,RALA,RPL10,RPL12,RPL27A,RPL30,Rpl34 (includes others),Rpl36,RPL5,RPL7,RPS10,RPS12,RPS16,RPS18,RPS19,RPS20,RPS25,RPS26,RPS2…	86 (18)	17				D-glucose,Ins1,PTGS2	RAC1
PRLR	transmembrane receptor		2		-0.655	2.04e-12	AKT1,Creb,ERK,ERK1/2,JAK2,MAP2K1,PI3K (complex),PLG,PRL,PRLR,STAT1,STAT3,STAT5A,TP53	ACSS2,ACY3,ARG1,ASS1,ATP5S,BGN,BHMT,CENPE,CKMT2,COL6A2,COPB1,CPOX,CPT1A,CTSA,CTSH,CYP2S1,EEF1A1,FDXR,FHIT,G6PD,GLB1,GUSB,GYS2,HDLBP,HRAS,IDE,ITGAV,KCNMA1,KRT1,KRT5,KRT72,KRT8,LYZ,MVP,OAT,Pcmt1,PDK2,PEX1,PEX11A,PLIN3,PLSCR1,PSAP,PSMA1,RAB5A,RALA,RPL10,RPL12,RPL23,Rpl34 (includes others),Rpl36,RPL5,RPL7,RPS12,RPS16,RPS18,RPS19,RPS20,RPS25,RPS26,RPS27L,RPS3,RPS5,RPSA,SCD,SCO2,SCPEP1,SERPINF1,SET,SGP…	84 (14)	13	trichloroethylene	benzyloxycarbonyl-Leu-Leu-Leu aldehyde,genistein,LRP6		CDKN1A,Creb,MYC	D-glucose
Kap	other		3		0.305	2.25e-12	AKT1,AMPK,CASP1,CAT,EGFR,ERK1/2,FOXO1,glutathione peroxidase,GPX1,HSF1,hydrogen peroxide,IKBKB,INSR,JAK2,Jnk,Kap,MAPK1,Nfat (family),NFkB (complex),NFKBIA,P38 MAPK,PRKAA,STAT3,TP53	ACOT2,ACSS2,AK2,ANPEP,ARG1,ARSB,BGN,BHMT,CDK5RAP3,CENPE,Ces1b/Ces1c,COPB1,CPOX,CTNNA2,CTSH,CTSZ,EIF4E,FDXR,GLA,GLB1,GM2A,GPX4,HDLBP,HRAS,IDE,KCNMA1,KIAA0391,KRT17,KRT6B,LYZ,MAVS,MRPL45,MRPL47,MRPL55,NCL,NUS1,NUTF2,OAT,Pcmt1,PDK2,PECR,PEX1,PEX11A,PLD3,PLSCR1,PPT2,PRDX1,PSAP,PSMA1,RAB5A,RPL10,RPL12,RPL21,RPL22,RPL27A,RPL31,Rpl34 (includes others),Rpl36,RPL5,RPL7,RPL7A,RPL8,RPS12,RPS16,RPS19,RPS2,RP…	97 (24)	22	ciprofibrate,L-triiodothyronine	ACOX1			CAT
arsenic	chemical toxicant		2		-1.091	2.35e-12	arsenic,EGFR,ERK,ERK1/2,HIF1A,Jnk,MTOR,NFE2L2,SP1,TP53	ACSS2,AGPAT3,ARG1,ATP5S,BGN,BHMT,CELA1,CENPE,Ces1b/Ces1c,CKMT2,CNP,COL6A2,COPB1,CPOX,CPT1A,CREG1,CTSH,EEF1A1,EIF3A,EIF4E,FDXR,FTL,G6PC,G6PD,GLB1,HDLBP,HIST2H2AC,HRAS,IDE,ISG15,KCNMA1,KIAA0391,KRT1,KRT17,KRT18,KRT8,LYZ,MGLL,MOGS,MVP,NCL,NUTF2,OAT,Pcmt1,PCYT1A,PDK2,PLSCR1,PRDX1,PSAP,PSMD13,RACK1,RPL10,RPL23,Rpl34 (includes others),Rpl36,RPL5,RPL7,RPLP0,RPS12,RPS19,RPS20,RPS25,RPS26,RPS27L,RPS3,RPS5…	84 (10)	10				NFE2L2,NQO1	TP53
6-thioguanylic acid	chemical reagent		3		1.82	2.4e-12	6-thioguanylic acid,Akt,AKT1,Cdc42,CDH1,CTNNB1,EGFR,ELAVL1,ERK,ERK1/2,ESR1,HIF1A,HRAS,JUN,MAP3K1,MAPK1,MAPK11,MAPK14,Mek,NFAT5,NFkB (complex),P38 MAPK,PI3K (complex),PLA2G4A,RAC1,RAC2,RELA,SRF,STAT1,STAT3,TP53	ACSS2,ANO10,ANPEP,AP3B1,ARG1,ARSB,ASS1,ATP5S,BCL2L1,BCLAF1,BGN,BHMT,CENPE,Ces1b/Ces1c,CKMT2,COL6A2,COPA,COPB1,COPB2,CPOX,CPT1A,CTNNA2,CTSA,CTSC,CTSZ,CXADR,DDB1,EEF1A1,EIF4E,FABP2,FHIT,G6PD,GLA,GLB1,GUSB,HDLBP,HIST2H2AC,HRAS,IGKC,Igkv1-117,KIAA0391,Krt10,KRT13,KRT18,KRT6B,KRT8,MAN2B2,MINOS1,MOGS,Mup1 (includes others),NCL,NLN,NUTF2,OS9,Pcmt1,PCYT1A,PDK2,PEX1,PEX11A,PPT2,PRDX1,PRG2,PSAP,PSMA1,RAB5A…	109 (31)	30					RAC1
CLK1	kinase		3	Activated	2.223	2.4e-12	Akt,AKT1,BCAR1,CD247,CLK1,Creb,CSF1R,EGFR,EIF2S1,ERK,ERK1/2,ESR1,Focal adhesion kinase,IGF1R,INSR,Insulin,IRS1,IRS2,JAK2,LEPR,MAPK1,MAPK14,MAPK8,NFkB (complex),P38 MAPK,PI3K (complex),PTK6,PTPN1,RAF1,RAS,SMAD3,SRSF2,STAT3,STAT5A,STAT6,TP53	ACOT12,ACOT2,ACSS2,ACY3,ANO10,AP3B1,ARSB,ASS1,BCLAF1,BHMT,COPA,COPB1,CPOX,CTNNA2,CTSC,CTSH,CXADR,EEF1A1,EIF3A,EIF4E,FABP2,FADS2,FDXR,FHIT,FTL,G6PC,G6PD,GLA,GLB1,GYS2,HDLBP,HNRNPK,HRAS,IDE,Ighg2b,KCNMA1,KIAA0391,KRT1,Krt10,KRT18,LYZ,MGLL,MINOS1,MVP,NCL,Nnt,NUTF2,OAT,OS9,Pcmt1,PDK2,PECR,PEX1,PEX11A,PLIN3,PLSCR1,PPT2,PRDX1,PSAP,PSMA1,RAB5A,RALA,RNASET2,RPL10,RPL12,RPL23,Rpl34 (includes others),Rpl36…	107 (36)	34				SRSF2
p160	group		3		0.535	2.49e-12	Akt,AR,ATF4,CTNNB1,EGFR,ERBB2,ERK,ESR1,ESR2,ESRRA,estrogen receptor,FOS,genistein,HNF4A,JUN,MAPK1,NCOA1,NCOA2,NCOA3,NCOA4,NFkB (complex),NR4A1,NR5A2,p160,PGR,PI3K (complex),PPARA,PPARG,Rar,RB1,SRF,STAT3,STAT5A,T3-TR-RXR,THRB,TNF,TP53	ABCD2,ACOT2,ACSS2,AK2,AP3B1,ARSA,ARSB,ATP5S,BCLAF1,C8A,CELA1,CELSR3,CENPE,Ces1b/Ces1c,CKMT2,COL6A2,COPA,COPB1,CTBS,CTNNA2,CTSA,CXADR,DNASE2,EEF1A1,EIF4E,ELOVL5,FABP2,FARS2,FDXR,FHIT,FUCA1,GALNS,GARS,GLA,GPX4,GUSB,GYS2,HDLBP,HRAS,IDE,IGKC,KIAA0391,Krt10,KRT13,KRT18,KRT5,KRT8,MANBA,MGLL,MINOS1,MOGS,MRPL55,Mup1 (includes others),NCL,NEU1,NUTF2,OAT,OS9,PAICS,Pcmt1,PCYT1A,PDK2,PEX1,PEX11A,PLA2G15,PLBD…	126 (37)	34
coumarin	chemical drug		3		0.834	2.87e-12	acetaminophen,Akt,benzo(a)pyrene,CHUK,coumarin,CYP,CYP2A6 (includes others),D-glucose,diethylnitrosamine,dimethylnitrosamine,ERK1/2,G6PC,Ggt,HRAS,methimazole,NFkB (complex),NFKBIA,nicotine,NQO1,P38 MAPK,Pkc(s),tanespimycin,TP53	ACSS2,AK2,ASS1,ATP5S,BCL2L1,BGN,BHMT,CENPE,Ces1b/Ces1c,CKMT2,COL6A2,COPB1,COPB2,CPOX,CPT1A,CTSH,CTSZ,DDB1,EEF1A1,FABP2,FHIT,G6PC,G6PD,GLA,GLB1,GM2A,GUSB,HDLBP,HNRNPK,HRAS,IGKC,KCNMA1,KRT17,KRT6B,KRT8,LYZ,Mup1 (includes others),MVP,NEU1,NLN,OAT,Pcmt1,PCYT1A,PDK2,PLD3,PLIN3,PLSCR1,PRDX1,PSAP,PSMA1,RAB5A,RPL10,RPL12,RPL24,Rpl34 (includes others),RPL35,Rpl36,RPL5,RPL7,RPL8,RPS10,RPS12,RPS16,RPS18,RPS…	92 (23)	18				diethylnitrosamine,NQO1	CYP
PRPF6	transcription regulator		3		-0.557	3e-12	Akt,AKT1,AR,CCNE1,Creb,CREB1,EGFR,ERBB2,ERK1/2,ESR1,FOS,GATA1,JUN,MAPK1,MED1,Mek,NCOA4,NR1H4,NR3C1,NR4A1,PI3K (complex),PRPF6,PTGS2,SHC1,SMAD3,SREBF2,STAT5A,Tgf beta,TP53	ACP6,ACSS2,ACY3,ANO10,ANPEP,AP3B1,ARSB,ATP5S,BCL2L1,BCLAF1,BHMT,CENPE,Ces1b/Ces1c,CKMT2,COPA,COPB1,CPOX,CREG1,CTNNA2,CTSC,CTSH,CXADR,EIF4E,FABP2,FADS2,FARS2,FDXR,FHIT,FTL,G6PC,G6PD,GAA,GLB1,GUSB,GYS2,HDLBP,HRAS,Ighg2b,ISG15,ITGAV,KCNMA1,KIAA0391,KRT1,KRT18,KRT5,KRT72,KRT8,MINOS1,MOGS,NCL,NUTF2,OAT,OS9,PAICS,Pcmt1,PCYT1A,PDK2,PDXK,PEX11A,PLIN3,PPT2,PRCP,PRG2,PSMA1,RPL10,RPL12,RPL17,RPL22,RPL23,RPL…	116 (29)	28
carnosine	chemical - endogenous mammalian		3		-0.305	3.49e-12	AKT1,AMPK,carnosine,CASP1,CAT,EGFR,ERK1/2,Ferritin,FOXO1,HSF1,hydrogen peroxide,IKBKB,INSR,JAK2,Jnk,MAPK1,Nfat (family),NFkB (complex),NFKBIA,P38 MAPK,PRKAA,STAT3,TP53	ACOT2,ACSS2,AK2,ANPEP,ARG1,ARSB,BGN,BHMT,CDK5RAP3,CENPE,Ces1b/Ces1c,COPB1,CPOX,CTNNA2,CTSH,CTSZ,EIF4E,FDXR,G6PC,GLA,GLB1,GM2A,HDLBP,HRAS,IDE,KCNMA1,KIAA0391,KRT17,KRT6B,LYZ,MAVS,MRPL45,MRPL47,MRPL55,NCL,NUS1,NUTF2,OAT,Pcmt1,PDK2,PECR,PEX1,PEX11A,PLD3,PLSCR1,PPT2,PRDX1,PSAP,PSMA1,RAB5A,RPL10,RPL12,RPL21,RPL22,RPL27A,RPL31,Rpl34 (includes others),Rpl36,RPL5,RPL7,RPL7A,RPL8,RPS12,RPS16,RPS19,RPS2,RP…	97 (23)	22				CAT	FASN,SREBF2
VPS13A	transporter		3		-1.993	3.52e-12	Akt,AKT1,BAD,BCL2,Cdc42,CDH1,CSF2,CTNNB1,EGFR,ERK,ERK1/2,ESR1,HIF1A,HRAS,JUN,MAP3K1,MAPK1,MAPK11,MAPK14,Mek,NFAT5,NFkB (complex),P38 MAPK,PI3K (complex),PLA2G4A,RAC1,RAF1,RELA,SRF,STAT3,TP53,VPS13A	ACSS2,ANO10,ANPEP,AP3B1,ARSB,ASS1,ATP5S,BCL2L1,BCLAF1,BGN,BHMT,CENPE,Ces1b/Ces1c,CKMT2,COPA,COPB1,COPB2,CPOX,CPT1A,CTNNA2,CTSA,CTSC,CTSZ,CXADR,DDB1,EEF1A1,EIF4E,FABP2,FHIT,G6PD,GLA,GLB1,GUSB,HDLBP,HIST2H2AC,HRAS,Ighg2b,IGKC,Igkv1-117,KIAA0391,Krt10,KRT13,KRT18,KRT6B,KRT8,MAN2B2,MGLL,MINOS1,MOGS,Mup1 (includes others),NCL,NLN,NUTF2,OS9,Pcmt1,PDK2,PEX1,PEX11A,PLA2G15,PPT2,PRDX1,PRG2,PSAP,PSMA1,RAB5…	111 (32)	31				RAC1
EFNA2	kinase		3		1.437	3.87e-12	Akt,AKT1,Cdc42,CDH1,CTNNB1,EFNA2,EGFR,ERK,ERK1/2,ESR1,HIF1A,HRAS,JUN,MAP3K1,MAPK1,MAPK11,MAPK14,Mek,NFAT5,NFkB (complex),P38 MAPK,PI3K (complex),RAC1,RELA,SRF,STAT1,STAT3,TP53	ACSS2,ANO10,ANPEP,AP3B1,ARG1,ARSB,ASS1,ATP5S,BCLAF1,BGN,BHMT,CENPE,Ces1b/Ces1c,CKMT2,COL6A2,COPA,COPB1,COPB2,CPOX,CPT1A,CTNNA2,CTSA,CTSC,CTSZ,CXADR,DDB1,EEF1A1,EIF4E,FABP2,FHIT,G6PD,GLA,GLB1,GUSB,HDLBP,HIST2H2AC,HRAS,IGKC,Igkv1-117,KIAA0391,KRT1,Krt10,KRT13,KRT18,KRT6B,KRT8,MAN2B2,MINOS1,MOGS,Mup1 (includes others),NCL,NLN,NUTF2,OS9,Pcmt1,PCYT1A,PDK2,PEX1,PEX11A,PPT2,PRDX1,PRG2,PSAP,PSMA1,RAB5A,R…	109 (28)	28					NT5E,RAC1
MAPK11	kinase		2		1.106	4.07e-12	CCND1,CREB1,CREM,DDIT3,ESR2,FOS,IKBKB,JUN,KAT5,MAPK11,Mek,MKNK1,MKNK2,NFE2L2,P38 MAPK,PDX1,SOX9,SRF,STAT1,TP53	ACSS2,AGPAT3,ASS1,ATP5S,BCLAF1,BGN,BHMT,CELA1,CENPE,Ces1b/Ces1c,CKMT2,COL6A2,COPB1,CPOX,CPT1A,CREG1,CTNNA2,CTSH,CTSZ,DDB1,EEF1A1,EIF5,FARS2,FDXR,FTL,G6PD,GAA,GLA,GLB1,GM2A,GUSB,HDLBP,HRAS,IDE,ISG15,KCNMA1,KRT1,KRT17,KRT6B,KRT8,LYZ,MGLL,MVP,OAT,Pcmt1,PCYT1A,PDK2,PDXK,PLD3,PRCP,PRDX1,PRG2,PSAP,PSMD13,RAB5A,RACK1,RPL12,RPL13,RPL23,RPL27A,Rpl34 (includes others),Rpl36,RPL5,RPL7,RPL9,RPS12,RPS18,RPS19…	99 (20)	20	arsenite,D-glucose,Ins1,MAP2K6,MAP3K5,RAC1,TCR	PML		CCND1,DDIT3,FOS,LRP6,PTGS2,TP53	NFE2L2
ranitidine	chemical drug		3		1.493	4.67e-12	APP,BCAR1,BCL2,CCND1,CREM,CSF1,CYP2D6,DUSP1,ERK,ERK1/2,FOS,HDC,HIF1A,HSF1,MAP2K1,MAPK1,MAPK3,MCL1,MED1,NFE2L2,NFKBIA,ODC1,p70 S6k,RAF1,ranitidine,SHC1,SMAD2,SREBF1,SREBF2,STAT3,tamoxifen,TP53,TWIST1,XBP1	ACP6,AGPAT3,AK2,ARSB,ATP5S,BCLAF1,BGN,BHMT,CELA1,CENPE,Ces1b/Ces1c,CKMT2,COL6A2,COPB2,CPOX,CREG1,CTNNA2,CTSZ,CXADR,EEF1A1,EIF4E,EIF5,FARS2,FDXR,FTL,G6PD,GLB1,GM2A,GUSB,HDLBP,HIST2H2AC,HRAS,IDE,Ighg2b,Igkv1-117,KCNMA1,KIAA0391,LYZ,OAT,Pcmt1,PDK2,PDXK,PEX1,PEX11A,PLD3,PLSCR1,PPT2,PRDX1,PSAP,PSMA1,PSMD13,RACK1,RALA,RNASET2,RPL10,RPL12,RPL13,RPL22,Rpl34 (includes others),Rpl36,RPL5,RPL7,RPL8,RPL9,RPL…	101 (34)	29					MAPK3
TRH	other		2		-0.436	4.84e-12	EGFR,FOS,JUN,KRT14,L-triiodothyronine,Mapk,MAPK1,PRKCA,RAF1,TP53,TRH	ABCD2,ACOT2,ACSS2,ANPEP,ARG1,ARSA,ARSB,ATP5S,BCL2L1,CENPE,Ces1b/Ces1c,CKMT2,COL6A2,COPB1,CPOX,CPT1A,CTNNA2,EEF1A1,EIF4E,ETF1,FARS2,FDXR,G6PD,GLB1,HDLBP,HRAS,ISG15,KCNMA1,KIAA0391,KRT1,KRT18,KRT5,KRT6B,LYZ,MGLL,MOGS,Mup1 (includes others),NCL,NUTF2,OAT,Pcmt1,PLSCR1,PPT2,PSAP,PSMA1,RPL10,RPL12,Rpl34 (includes others),Rpl36,RPL5,RPL7,RPL9,RPLP0,RPS12,RPS16,RPS19,RPS2,RPS20,RPS24,RPS25,RPS26,RPS27L,R…	84 (11)	11	FAAH,NCOR1			arachidonic acid,creatine kinase,FOS,Ins1,KRT14,MAPK3,PRL,TSH	TP53
carvacrol	chemical - endogenous non-mammalian		3	Inhibited	-4.178	4.86e-12	AKT1,APP,BCL2,carvacrol,CDKN1B,CEBPB,Creb,CREB1,CSF1,EGFR,ESR1,FOS,GATA4,glutathione peroxidase,GPX1,HIF1A,HNF4A,HSF1,IKBKB,IL2,KAT5,KLF4,MAP2K1,MAPK1,NCOA1,NFE2L2,NFKBIA,NR4A1,P38 MAPK,p70 S6k,PGR,PI3K (complex),POU5F1,PPARA,PPARG,progesterone,RAF1,RARA,RB1,SAT1,SHC1,SMAD3,SMAD4,Sod,SP1,SREBF1,SREBF2,STAT3,TERT,TP53,TWIST1	ABCD2,ACOT2,ACSS2,ACY3,AGPAT3,AK2,AMY2A,ANO10,ANPEP,AP3B1,ARSB,ASS1,ATP5S,BCL2L1,BCLAF1,C8A,CELA1,CELSR3,COPA,COPB1,CPOX,CPT1A,CTBS,CTNNA2,CTSZ,DARS2,DDB1,DDX25,EEF1A1,ELOVL5,FABP2,FADS2,FARS2,FMO3,FTL,G6PD,GAA,GARS,GLB1,GM2A,GPX4,GUSB,HDLBP,HIST2H2AC,HPD,Ighg2b,IGKC,ISG15,ITGAV,KCNMA1,KIAA0391,Krt10,KRT13,KRT17,KRT18,KRT5,MGLL,MINOS1,MRPL55,Mup1 (includes others),MVP,NCL,NUTF2,OS9,PCYT1A,PDXK,PE…	132 (51)	48				PPARA	PTGS2
RAC1	enzyme	1.015	2		-1.732	4.98e-12	Akt,AKT1,Cdc42,CDH1,CTNNB1,EGFR,ERK,ERK1/2,ESR1,HIF1A,HRAS,JUN,MAP3K1,MAPK1,MAPK11,MAPK14,Mek,NFAT5,NFkB (complex),P38 MAPK,PI3K (complex),PLA2G4A,RAC1,RELA,SRF,STAT1,STAT3,TP53	ACSS2,ANO10,ANPEP,AP3B1,ARG1,ARSB,ASS1,ATP5S,BCLAF1,BGN,BHMT,CENPE,Ces1b/Ces1c,CKMT2,COL6A2,COPA,COPB1,COPB2,CPOX,CPT1A,CTNNA2,CTSA,CTSC,CTSZ,CXADR,DDB1,EEF1A1,EIF4E,FABP2,FHIT,G6PD,GLA,GLB1,GUSB,HDLBP,HIST2H2AC,HRAS,IGKC,Igkv1-117,KIAA0391,Krt10,KRT13,KRT18,KRT6B,KRT8,MAN2B2,MINOS1,MOGS,Mup1 (includes others),NCL,NLN,NUTF2,OS9,Pcmt1,PCYT1A,PDK2,PEX1,PEX11A,PPT2,PRDX1,PRG2,PSAP,PSMA1,RAB5A,RALA,R…	108 (28)	28	8-bromoguanosine 3',5'-cyclic monophosphate,AKT3,arsenite,benzyloxycarbonyl-Leu-Leu-Leu aldehyde,D-glucose,DOCK4,DOCK5,Ephb,EPHB2,Focal adhesion kinase,GIP,GNA12,GPI,IGF1R,Insulin,LGALS3,Ngf,PDE2A,polyamines,PTK2,putrescine,RACK1,RAPGEF3,RAS,RICTOR,Sos,SVIL,TCR,TSC2,VPS13A	6-thioguanylic acid,8-oxo-7-hydrodeoxyguanosine,ARHGDIB,CD37,CDK5,EFNA2,genistein,GPR68,methyl-beta-cyclodextrin,mir-144,mir-194,mir-451,NF1,RAP1GAP,RDX,S100A4,SEMA3E,sirolimus,SPP1,tempol,UBE3A		CCND1,HOXA1,KRT14,MAPK11,MAPK3,MYC,NFAT5,PIK3CB,PRL,TRPC5,WAS
Pde3	group		3		0.976	4.98e-12	ATP2A2,Creb,cyclic AMP,ERK1/2,ERN1,HRAS,Lh,LHCGR,MAPK1,Pde3,PDE3A,PDE3B,PI3K (complex),PPARG,RAF1,RYR2,TP53	ACSS2,ACY3,ANPEP,ARG1,ARSB,ASS1,ATP5S,BHMT,CENPE,Ces1b/Ces1c,CKMT2,COL6A2,COPB1,COPB2,CPOX,CPT1A,CTNNA2,CTSH,EEF1A1,FABP2,FDXR,FHIT,G6PD,GLB1,GUSB,HDLBP,HRAS,IGKC,ISG15,KCNMA1,KIAA0391,KRT1,KRT17,KRT8,LYZ,NLN,Pcmt1,PCYT1A,PDK2,PEX11A,PLIN3,PLSCR1,PPT2,PSAP,PSMA1,RPL10,RPL12,RPL23,RPL27A,RPL30,Rpl34 (includes others),Rpl36,RPL5,RPL7,RPS10,RPS12,RPS16,RPS18,RPS19,RPS2,RPS20,RPS25,RPS26,RPS27L,RPS3,…	85 (17)	12	ADA,Ins1,Insulin
CAT	enzyme	-1.226	2		-0.408	5.35e-12	AKT1,AMPK,CASP1,CAT,EGFR,ERK1/2,FOXO1,HSF1,hydrogen peroxide,IKBKB,INSR,JAK2,Jnk,MAPK1,Nfat (family),NFkB (complex),NFKBIA,P38 MAPK,PRKAA,STAT3,TP53	ACOT2,ACSS2,AK2,ANPEP,ARG1,ARSB,BGN,BHMT,CDK5RAP3,CENPE,Ces1b/Ces1c,COPB1,CPOX,CTNNA2,CTSH,CTSZ,EIF4E,FDXR,GLA,GLB1,GM2A,HDLBP,HRAS,IDE,KCNMA1,KIAA0391,KRT17,KRT6B,LYZ,MAVS,MRPL45,MRPL47,MRPL55,NCL,NUS1,NUTF2,OAT,Pcmt1,PDK2,PECR,PEX1,PEX11A,PLD3,PLSCR1,PPT2,PRDX1,PSAP,PSMA1,RAB5A,RPL10,RPL12,RPL21,RPL22,RPL27A,RPL31,Rpl34 (includes others),Rpl36,RPL5,RPL7,RPL7A,RPL8,RPS12,RPS16,RPS19,RPS2,RPS20,R…	96 (21)	21	benzyloxycarbonyl-Leu-Leu-Leu aldehyde,carnosine,ciprofibrate,clofibric acid,epigallocatechin-gallate,etretinate,gamma-tocotrienol,genistein,Ins1,Ldh (complex),linolenic acid,MUC1,NFE2L2,nicotinic acid,pirinixic acid,PPARA,PRKAA1,selenium,tempol,troglitazone,XBP1	ACOX1,arsenite,cadmium,D-glucose,HSPA1A/HSPA1B,Kap,methapyrilene,nitrofurantoin,oxadiazon,PML,S-nitrosoglutathione			CDKN1A,IGF1R,MAP3K5,NFKBIA,PRKAA,PTGS2
HRAS	enzyme	1.57	2	Inhibited	-2.635	5.52e-12	Akt,AKT1,Ap1,Cdc42,CDH1,CHUK,CREB1,ERK,ERK1/2,ETS2,FOS,HRAS,IKBKB,JUN,MAP2K3,MAP3K1,MAPK1,MAPK14,Mek,NFkB (complex),P38 MAPK,p70 S6k,PI3K (complex),PTK2,RAC1,Raf,RAF1,RALGDS,RB1,RELA,SMAD3,TP53,TP73	ACSS2,ANPEP,ARL1,ARSB,ASS1,ATP5S,BCL2L1,BGN,BHMT,CENPE,CKMT2,COL6A2,COPB1,COPB2,CPOX,CTNNA2,CTSA,CTSH,CTSZ,DDB1,EEF1A1,FABP2,FARS2,FDXR,FHIT,G6PD,GAA,GLA,GLB1,GM2A,GUSB,HDLBP,IGKC,KCNMA1,KIAA0391,KRT13,KRT18,KRT6B,KRT8,MAN2B2,MGLL,MOGS,MRPL55,NLN,OAT,Pcmt1,PCYT1A,PDK2,PDXK,PEX11A,PLD3,PPT2,PRCP,PRDX1,PSAP,PSMA1,RAB5A,RALA,RPL10,RPL12,RPL23,RPL27A,RPL30,Rpl34 (includes others),Rpl36,RPL5,RPL7,RPL9…	105 (33)	33	AGT,BAIAP3,CCL11,diethylnitrosamine,Ephb,EPHB1,EPO,GAB1,Grb2-Shc1-Sos,Ins1,Insulin,KNDC1,NF1,PIK3CB,RAP2B,RAPGEF3,S-nitrosoglutathione,SH2B2,Sos,SYNGAP1,TCR,Trk Receptor,TSH	AMPK,DOK1,Eph Receptor,EPHB2,irbesartan,methyl-beta-cyclodextrin,PRKAA1,RAP1GAP,RASA1		CCND1,Cdc42,CDH1,CDKN1A,DDIT3,FASN,FBXW11,FOS,IGF1R,KRAS,MAPK12,MAPK3,PLAUR,PRL,PTGS2,PTK2,SERPINB2,SPP1,SREBF1	GUSB,miR-542-3p (miRNAs w/seed GUGACAG),NFKBIA,SNAI1
TRIM41	other	-1.63	3		-0.862	5.64e-12	26s Proteasome,AKT1,AR,CCNE1,CHUK,Creb,CREB1,DDX58,EGFR,EIF4E,ERBB2,ERK1/2,ESR1,IKBKB,INSR,JAK2,KRAS,MAP2K1,Mek,NCOA4,NFKBIA,P38 MAPK,PPARA,PRKCB,RAF1,RAS,SMAD3,SREBF2,TFEB,TP53,TP73,TRIM41,VEGFA	ABCD2,ACY3,AK2,ANO10,AP3B1,ARSA,ATP5S,BCLAF1,BHMT,C8A,CENPE,Ces1b/Ces1c,CKMT2,COPA,COPB1,CPOX,CTSA,CTSC,CTSH,CTSZ,DGUOK,EEF1A1,EIF4E,EIF5,ELOVL5,FABP2,FDXR,GAA,GALNS,GLB1,GM2A,GUSB,HDLBP,HPD,KCNMA1,KRT1,Krt10,LYZ,MGLL,MINOS1,MTRR,Mup1 (includes others),NEU1,NUTF2,OAT,OS9,PAICS,Pcmt1,PCYT1A,PDK2,PDXK,PECR,PLD3,PLIN3,PRCP,PRDX1,PSAP,PSMA1,RAB5A,RPL10,RPL12,RPL17,RPL23,RPL27A,Rpl34 (includes others)…	109 (33)	31
S29	chemical - kinase inhibitor		3	Activated	2.415	5.65e-12	Akt,AKT1,AMPK,APC,APP,AR,CD247,CDH1,CDK1,CDKN1B,CHUK,Creb,CTNNB1,DAG1,EGFR,EIF4E,ERBB2,ERK,ERK1/2,ESR1,ETS1,EZH2,FOS,FOXO1,GAB1,HINT1,HNRNPK,HRAS,IGF1R,IKBKB,ING1,IRF4,JUN,JUNB,KRAS,MAP2K3,MAPK1,MAPK9,MCL1,MYOD1,NFKBIA,NOS2,P38 MAPK,PI3K (complex),PKD1,RAF1,RAS,RB1,RELA,S29,SPTAN1,SRC,STAT3,STAT5A,STAT6,TP53	ACOT2,ACSS2,ACY3,AK2,ANO10,ANPEP,AP3B1,ARL1,ARSB,ASS1,BCL2L1,BCLAF1,BHMT,CDK5RAP3,CNP,COPA,COPB1,COPB2,CPOX,CTNNA2,CTSZ,DDB1,DDX25,DGUOK,DNASE2,EEF1A1,EIF3A,EIF4E,EIF5,ELOVL5,FABP2,FADS2,FARS2,FHIT,FUCA1,GM2A,GYS2,HDLBP,HGD,HRAS,IGKC,KCNMA1,KIAA0391,KRT1,Krt10,KRT13,MAVS,MGLL,MINOS1,MOGS,MRPL45,MRPL47,MRPL55,MTRR,Mup1 (includes others),NCL,NLN,NUTF2,OAT,OS9,PAICS,Pcmt1,PDK2,PECR,PEX1,PEX11A,PLD3,…	125 (56)	54
S7	chemical - kinase inhibitor		3	Activated	2.415	5.65e-12	Akt,AKT1,AMPK,APC,APP,AR,CD247,CDH1,CDK1,CDKN1B,CHUK,Creb,CTNNB1,DAG1,EGFR,EIF4E,ERBB2,ERK,ERK1/2,ESR1,ETS1,EZH2,FOS,FOXO1,GAB1,HINT1,HNRNPK,HRAS,IGF1R,IKBKB,ING1,IRF4,JUN,JUNB,KRAS,MAP2K3,MAPK1,MAPK9,MCL1,MYOD1,NFKBIA,NOS2,P38 MAPK,PI3K (complex),PKD1,RAF1,RAS,RB1,RELA,S7,SPTAN1,SRC,STAT3,STAT5A,STAT6,TP53	ACOT2,ACSS2,ACY3,AK2,ANO10,ANPEP,AP3B1,ARL1,ARSB,ASS1,BCL2L1,BCLAF1,BHMT,CDK5RAP3,CNP,COPA,COPB1,COPB2,CPOX,CTNNA2,CTSZ,DDB1,DDX25,DGUOK,DNASE2,EEF1A1,EIF3A,EIF4E,EIF5,ELOVL5,FABP2,FADS2,FARS2,FHIT,FUCA1,GM2A,GYS2,HDLBP,HGD,HRAS,IGKC,KCNMA1,KIAA0391,KRT1,Krt10,KRT13,MAVS,MGLL,MINOS1,MOGS,MRPL45,MRPL47,MRPL55,MTRR,Mup1 (includes others),NCL,NLN,NUTF2,OAT,OS9,PAICS,Pcmt1,PDK2,PECR,PEX1,PEX11A,PLD3,…	125 (56)	54
SI163	chemical - kinase inhibitor		3	Activated	2.415	5.65e-12	Akt,AKT1,AMPK,APC,APP,AR,CD247,CDH1,CDK1,CDKN1B,CHUK,Creb,CTNNB1,DAG1,EGFR,EIF4E,ERBB2,ERK,ERK1/2,ESR1,ETS1,EZH2,FOS,FOXO1,GAB1,HINT1,HNRNPK,HRAS,IGF1R,IKBKB,ING1,IRF4,JUN,JUNB,KRAS,MAP2K3,MAPK1,MAPK9,MCL1,MYOD1,NFKBIA,NOS2,P38 MAPK,PI3K (complex),PKD1,RAF1,RAS,RB1,RELA,SI163,SPTAN1,SRC,STAT3,STAT5A,STAT6,TP53	ACOT2,ACSS2,ACY3,AK2,ANO10,ANPEP,AP3B1,ARL1,ARSB,ASS1,BCL2L1,BCLAF1,BHMT,CDK5RAP3,CNP,COPA,COPB1,COPB2,CPOX,CTNNA2,CTSZ,DDB1,DDX25,DGUOK,DNASE2,EEF1A1,EIF3A,EIF4E,EIF5,ELOVL5,FABP2,FADS2,FARS2,FHIT,FUCA1,GM2A,GYS2,HDLBP,HGD,HRAS,IGKC,KCNMA1,KIAA0391,KRT1,Krt10,KRT13,MAVS,MGLL,MINOS1,MOGS,MRPL45,MRPL47,MRPL55,MTRR,Mup1 (includes others),NCL,NLN,NUTF2,OAT,OS9,PAICS,Pcmt1,PDK2,PECR,PEX1,PEX11A,PLD3,…	125 (56)	54
LILRB1	transmembrane receptor		3	Activated	3.082	6.01e-12	Akt,AMPK,Ap1,APP,BCL2,CD247,CDKN1B,CEBPB,Creb,CREB1,CREM,CSF1,EGFR,ERK,ERK1/2,ESR1,FOS,GAB1,GATA4,HIF1A,HRAS,HSF1,JUN,KAT5,KLF4,L1CAM,LAT,LILRB1,MAPK1,MAPK3,MCL1,MED1,NCOA1,Nfat (family),NFE2L2,NFkB (complex),NFKBIA,NR4A1,P38 MAPK,p70 S6k,PI3K (complex),POU5F1,RAC1,RAF1,RARA,RUNX1,SHC1,SHP,SP1,SREBF1,SREBF2,TP53,TWIST1,VAV1,XBP1	ACP6,ACY3,AGPAT3,AK2,ANO10,ANPEP,AP3B1,ARSB,ASS1,ATP5S,BCLAF1,BHMT,CELA1,CELSR3,Ces1b/Ces1c,CKMT2,COPA,CPOX,CREG1,CTNNA2,CTSZ,DDB1,DDX25,EEF1A1,EIF4E,FADS2,FARS2,FDXR,FHIT,FTL,G6PC,GAA,GLA,GLB1,GM2A,HDLBP,HIST2H2AC,HRAS,IDE,Ighg2b,IGKC,ISG15,ITGAV,KCNMA1,KIAA0391,KRT1,Krt10,KRT13,KRT17,KRT6B,MINOS1,MOGS,MVP,NCL,NLN,NUS1,NUTF2,OAT,OS9,Pcmt1,PCYT1A,PDK2,PDXK,PLD3,PLIN3,PLSCR1,PPT2,PRCP,PRG2,PSAP,PS…	129 (55)	52		sirolimus			Focal adhesion kinase,MAPK3
diadenosine triphosphate	chemical - endogenous mammalian		3	Inhibited	-2.652	6.01e-12	Akt,Ap1,APP,BCL2,CDKN1B,CEBPB,CHUK,Creb,CREB1,CREM,CSF1,diadenosine triphosphate,EGFR,ERK,ERK1/2,ESR1,FOS,FOXO1,GAB1,GATA4,HIF1A,HRAS,HSF1,IKBKB,KAT5,KLF4,MAPK1,MAPK3,MCL1,MED1,Mek,MYOD1,NCOA1,NFE2L2,NFkB (complex),NFKBIA,NR4A1,P2RY12,P38 MAPK,p70 S6k,PI3K (complex),POU5F1,RAF1,RARA,RELA,RUNX1,SHC1,SREBF1,SREBF2,TP53,TWIST1,XBP1	ACP6,ACY3,AGPAT3,AK2,ANO10,ANPEP,AP3B1,ARSB,ATP5S,BCLAF1,BHMT,CDK5RAP3,CELA1,CELSR3,Ces1b/Ces1c,COPA,CPOX,CREG1,CTNNA2,CTSH,CTSZ,DDB1,DDX25,EEF1A1,EIF4E,FADS2,FARS2,FHIT,FTL,GAA,GLA,GLB1,GM2A,HDLBP,HIST2H2AC,HRAS,IDE,Ighg2b,IGKC,ISG15,ITGAV,KCNMA1,KIAA0391,KRT1,Krt10,KRT13,KRT17,KRT6B,MAVS,MGLL,MINOS1,MRPL45,MRPL47,MRPL55,MVP,NCL,NLN,NUTF2,OAT,OS9,Pcmt1,PDK2,PDXK,PLD3,PLIN3,PLSCR1,PPT2,PRCP,PRG2,…	128 (52)	49				MAPK3
mir-144	microRNA		3		0.905	6.23e-12	ABCA1,AKT1,catalase,Cdc42,Creb,ERBB2,IGF1R,MAPK1,MAPK14,MDM2,mir-144,NFkB (complex),P38 MAPK,PPARA,PPARG,PTEN,PTGS2,SP1,STAT3,STK11,TFRC,TP53	ABCD2,ACOT2,ACP6,ACSS2,ACY3,AK2,AKAP1,ANPEP,ARSB,ATP5S,BCL2L1,BGN,C8A,CENPE,Ces1b/Ces1c,CKMT2,COL6A2,COPB1,CPOX,CPT1A,CTNNA2,CTSA,CTSZ,EEF1A1,EIF3A,ELOVL5,EMC4,FABP2,FADS2,FDXR,GLA,GLB1,HDLBP,HPD,HRAS,ITGAV,KCNMA1,KRT1,Krt10,KRT18,KRT5,KRT6B,LYZ,MGLL,Mup1 (includes others),NEU1,OAT,PAICS,Pcmt1,PCYT1A,PDK2,PECR,PEX1,PEX11A,PLIN3,PLSCR1,PPT2,PRDX1,PSAP,PSMA1,RAB5A,RPL10,RPL12,RPL17,Rpl34 (includes …	99 (22)	21				PTGS2	RAB14,RAC1,RASA1,ZNF148
TXNIP	other		2		0.338	6.26e-12	Ap1,CASP1,MAPK8,MTOR,NFkB (complex),PPARA,PPARG,TP53,TXNIP	ABCD2,ACOT2,ACSS2,ASS1,ATP5S,BCL2L1,C8A,CENPE,Ces1b/Ces1c,CKMT2,CNP,COL6A2,COPB1,CPOX,CTSH,EEF1A1,EIF3A,ELOVL5,FABP2,FADS2,FDXR,G6PD,GLA,GLB1,HDLBP,HPD,HRAS,ISG15,ITGAV,KCNMA1,KRT17,KRT18,KRT6B,KRT8,LYZ,MGLL,Mup1 (includes others),OAT,Pcmt1,PDK2,PEX11A,PSAP,PSMA1,RPL10,RPL12,RPL23,Rpl34 (includes others),Rpl36,RPL5,RPL7,RPS12,RPS16,RPS18,RPS19,RPS20,RPS25,RPS26,RPS27L,RPS3,RPS5,RPSA,SARDH,SCO2,SC…	79 (9)	9	2-deoxyglucose,MLXIPL	AGT,DDIT3,HDAC10,oleic acid,palmitic acid,tranilast,trichloroethylene		CDKN1A,Inflammasome (Nalp3, Asc, Casp1),MAP3K5,PTGS2,TP53	CCND1,FASN,PPARA
PRL	cytokine		2		-1.671	6.42e-12	AKT1,AR,Creb,EGFR,ERBB2,ERK,ERK1/2,ESR1,GCK,IGF1,IGF1R,JAK2,MAP2K1,MAPK1,MAPK9,NFkB (complex),NFKBIA,PI3K (complex),PRL,RAS,RB1,RELA,SHC1,SP1,STAT1,STAT3,STAT5A,STAT5B,TP53,ZAP70	ACY3,AK2,ANO10,ANPEP,AP3B1,ARG1,ARSB,ASS1,BCL2L1,BCLAF1,BGN,BHMT,CNP,COPA,COPB1,CPOX,CTNNA2,CTSA,CTSC,CTSH,CTSZ,CXADR,EEF1A1,EIF4E,FDXR,FTL,G6PD,GLA,GLB1,GM2A,GUSB,GYS2,HDLBP,HRAS,IDE,ISG15,ITGAV,KCNMA1,KIAA0391,KRT1,Krt10,KRT5,KRT72,LYZ,MINOS1,MRPL55,NCL,NUTF2,OAT,OS9,PAICS,Pcmt1,PCYT1A,PDK2,PDXK,PECR,PEX1,PEX11A,PLD3,PLIN3,PLSCR1,PPT2,PRDX1,PSAP,PSMA1,RPL10,RPL12,RPL17,RPL23,RPL27A,Rpl34 (inclu…	116 (30)	30	FGF19,HRAS,IRS2,L-triiodothyronine,NRIP1,pirinixic acid,PPARA,PRKACA,RAC1,TRH	6-aminonicotinamide,cAMP-dependent protein kinase,clotrimazole,cocaine,temozolomide		arachidonic acid,CCND1,CDH1,CTSA,GCK,GNA12,IGF1R,KRT14,MAPK3,MYC,pregnenolone,SPP1	BOK,CDKN1A
Ubiquitin	group		2		-0.671	6.58e-12	Akt,CCND1,EGR1,ERBB2,MAP3K7,PPARA,PRKN,PTTG1,SMAD2,SMAD3,SMAD4,TP53,Ubiquitin	ABCD2,ACOT2,ARG1,ASS1,ATP5S,BCLAF1,BGN,C8A,CENPE,Ces1b/Ces1c,CKMT2,COPB1,CPOX,CPT1A,CTSH,EIF5,ELOVL5,FADS2,FDXR,FHIT,FTL,G6PC,G6PD,GLB1,HDLBP,HPD,HRAS,ISG15,ITGAV,KCNMA1,KRT1,KRT18,KRT8,LYZ,Mup1 (includes others),MVP,OAT,PAICS,Pcmt1,PCYT1A,PDK2,PEX11A,PRDX1,PSAP,PSMA1,RPL12,RPL13,RPL17,RPL27A,Rpl34 (includes others),Rpl36,RPL5,RPL7,RPS10,RPS12,RPS16,RPS18,RPS19,RPS20,RPS25,RPS26,RPS27L,RPS3,RPS5,…	80 (13)	12	MYC,MYCN	benzyloxycarbonyl-Leu-Leu-Leu aldehyde,UBE4B			CCND1,DDIT3,HSP90B1,HSPA5,PPARA,TP53
CH5126766	chemical drug		3		1.742	6.64e-12	Akt,AKT1,Ap1,BCL2,BRAF,CDKN1A,CDKN1B,CH5126766,CHUK,Creb,CREB1,CTNNB1,EIF4E,ELAVL1,ERK,ERK1/2,ESR1,FOS,FOXO1,GATA4,HMGA1,HRAS,IKBKB,JUN,MAP2K3,MAP2K4,MAP2K6,MAP3K1,MAPK1,MAPK11,MAPK14,MCL1,Mek,MYOD1,Nfat (family),NFE2L2,NFkB (complex),NR3C1,PGR,Pkc(s),PPARG,Raf,RAF1,RB1,RELA,SRF,STAT3,TCF7L2	ABCD2,ACOT4,AGPAT3,ANO10,ANPEP,AP3B1,ARL1,ARSB,BCL2L1,BCLAF1,BHMT,CDK5RAP3,CELA1,Ces1b/Ces1c,CKMT2,CNP,COL6A2,COPA,COPB2,CREG1,CTBS,CTNNA2,CTSC,CTSH,CTSZ,CXADR,DDX25,DGUOK,ENPP4,FABP2,FARS2,FHIT,FTL,G6PD,GAA,GLA,GLB1,GM2A,GYS2,HRAS,IDE,Ighg2b,IGKC,Igkv1-117,KCNMA1,KIAA0391,KRT1,Krt10,KRT18,KRT6B,KRT8,LYZ,MAN2B2,MAVS,MGLL,MINOS1,MRPL45,MRPL47,MRPL55,Mup1 (includes others),NCL,NLN,NUS1,OAT,OS9,PDXK…	119 (48)	46
MAP3K5	kinase		2	Inhibited	-2.305	6.76e-12	26s Proteasome,Ap1,FOXO3,JINK1/2,MAP2K3,MAP2K4,MAP2K6,MAP3K5,MAPK1,MAPK11,MAPK12,MAPK13,MAPK14,MAPK9,Nfat (family),NFE2L2,P38 MAPK,TP53	ACSS2,AGPAT3,ANPEP,ARG1,ARL1,ARSB,ASS1,ATP5S,BGN,BHMT,CELA1,CENPE,Ces1b/Ces1c,CKMT2,COL6A2,COPB1,CPOX,CPT1A,CREG1,CTNNA2,CTSA,CTSH,EEF1A1,EIF4E,FDXR,FTL,G6PD,GLB1,HDLBP,HRAS,IDE,ITGAV,KCNMA1,KRT17,KRT18,KRT6B,KRT8,LYZ,MGLL,MOGS,NCL,NUS1,OAT,Pcmt1,PDK2,PPT2,PRDX1,PSAP,PSMA1,PSMD13,RAB5A,RACK1,RPL10,RPL12,Rpl34 (includes others),Rpl36,RPL5,RPL7,RPLP0,RPS12,RPS16,RPS18,RPS19,RPS20,RPS25,RPS26,RPS27L…	83 (18)	17	15-deoxy-delta-12,14 -PGJ 2,epigallocatechin-gallate,sirolimus,tanespimycin,TXNIP	CAT,CDKN1A,D-glucose,HSPA1A/HSPA1B,tempol		MAP2K6,MAPK11,MAPK12,MSH2,NFE2L2,TP53
CAMK2N2	other		3	Activated	3.132	6.88e-12	AKT1,APP,AR,CAMK2A,CAMK2N2,CaMKII,Cdc42,CEBPB,CHUK,CLOCK,Creb,EGFR,ERBB2,ESR2,FOS,FOXO1,GAB1,HSF1,IFNG,JUN,JUNB,KLF4,L1CAM,MAP2K3,MAPK1,MTOR,N-cor,NCOA1,Nfat (family),NFE2L2,NFKB1,NFKBIA,P38 MAPK,POU5F1,PPARG,PTEN,RAF1,RELA,RUNX1,SHC1,SOX2,SPARC,SREBF1,SREBF2,SRF,STAT3,TNFSF11,TP53,TSC2	ACOT2,ACY3,AGPAT3,AK2,AKAP1,ANPEP,ARL1,ARSB,ASS1,ATP5S,BCL2L1,CDK5RAP3,CELA1,CELSR3,Ces1b/Ces1c,CKMT2,CNP,COPB1,CPOX,CTNNA2,CTSA,DPP7,EIF3A,ELOVL5,FADS2,FARS2,FDXR,FRRS1,FTL,G6PC,GM2A,GYS2,HDLBP,HRAS,Ighg2a,IGKC,Igkv1-117,ISG15,ITGAV,KIAA0391,KRT1,KRT13,KRT17,MAVS,MOGS,MRPL45,MRPL47,MRPL55,MVP,NCL,NEU1,NUS1,NUTF2,PAICS,Pcmt1,PDK2,PEX1,PEX11A,PLD3,PLIN3,PLSCR1,PPT2,PRELP,PSMA1,PSMD13,RAB5A,RACK1,R…	111 (49)	46				CDKN1A,TP53	CCND1
arsenite	chemical toxicant		2	Inhibited	-2.753	7.97e-12	AKT1,arsenite,BAX,CDK4/6,CREB1,EGFR,EIF2S1,EIF4E,ERK,ESR1,HSF1,JINK1/2,JUN,MAP2K4,MAPK1,MAPK11,MAPK13,MAPK14,MAPK9,Mek,MTOR,NFkB (complex),NFKBIA,P38 MAPK,RAC1,SHC1,SRF,TP53	ACSS2,AK2,ANO10,AP3B1,ARSB,ASS1,ATP5S,BGN,CKMT2,CNP,COPA,COPB1,CPOX,CTNNA2,CTSC,CTSH,CTSZ,CXADR,DGUOK,EEF1A1,EIF3A,EIF4E,EIF5,FDXR,FHIT,FTL,G6PD,GAA,GLA,GLB1,GM2A,HDLBP,HRAS,Igkv1-117,KCNMA1,KIAA0391,KRT1,Krt10,KRT6B,KRT8,LYZ,MINOS1,MOGS,NCL,NUTF2,OAT,OS9,Pcmt1,PCYT1A,PDK2,PDXK,PEX11A,PLD3,PPT2,PRCP,PRDX1,PRG2,PSAP,PSMA1,RAB5A,RPL10,RPL13,RPL22,RPL27A,Rpl34 (includes others),Rpl36,RPL5,RPL7,RPL8,…	111 (28)	28				APEX1,CCND1,CDKN1A,DDIT3,FOS,MAPK11,NFE2L2,PTGS2,RAC1,TP53	CAT,CDK4/6,CYP1A1,NFKBIA
PTK2	kinase		2		0.503	8.08e-12	Akt,AKT1,BCAR1,CCND1,Cdc42,CREB1,ERK,ERK1/2,IGF1R,IL6,JAK2,Jnk,LCK,MAP2K1,MAPK8,MYD88,NFkB (complex),P38 MAPK,PI3K (complex),PTEN,PTK2,RAS,SHC1,STAT3,TP53,TSC2	AKAP1,ANPEP,ASS1,ATP5S,BCLAF1,BGN,BHMT,CENPE,Ces1b/Ces1c,CKMT2,COL6A2,COPB1,CPOX,CREG1,CTNNA2,CTSA,CTSZ,DPP7,Ear2 (includes others),EEF1A1,EIF5,FHIT,FTL,G6PD,GAA,GLA,GLB1,GUSB,HDLBP,HRAS,Ighg2b,KCNMA1,KRT1,KRT17,KRT18,KRT5,MVP,OAT,Pcmt1,PCYT1A,PDK2,PDXK,PECR,PEX1,PEX11A,PLSCR1,PRCP,PRDX1,PRELP,PSAP,PSMA1,RAB5A,RALA,RPL10,RPL12,RPL13,RPL23,RPL27A,Rpl34 (includes others),Rpl36,RPL5,RPL7,RPS12,RPS16…	99 (26)	26	AGT,D-glucose,Ephb,EPHB1,HRAS,HSPA1A/HSPA1B,IL15,Insulin,ITGA2B,LGALS3,MYCN,NCK2,PLAUR,RACK1,RADIL,Rap,RAPGEF3,TCR	5-fluorouracil,ADIPOQ,calpeptin,genistein,Ins1,sirolimus		CCND1,Cdc42,FOS,MAPK3,PTPN23,RAC1,RAS,SNAI1	TSC2
WRN	enzyme		3		-0.691	9.92e-12	26s Proteasome,APC,BCAR1,CDKN2A,CEBPA,CHEK1,CHUK,Creb,CREB1,CTNNB1,DDX58,ERBB2,ESR1,ESRRA,FGF1,FLI1,HIF1A,HNF4A,HNRNPK,IGF1R,IKBKB,IL6,INSR,JUN,KRAS,MAP2K1,MAPK1,Mek,MSH2,MTOR,NANOG,NFE2L2,NFKBIA,NOTCH1,NRIP1,PGR,PI3K (complex),PPARA,PPARG,PRKCB,PRKCD,PRKCE,RAF1,RAS,SHC1,STAT3,TFEB,TOP1,TP53,TSC2,VEGFA,WRN	ABCD2,ACSS2,ACY3,AGPAT3,AK2,ANO10,ANPEP,AP3B1,ARSA,ATP5S,BCL2L1,C8A,CELA1,CENPE,Ces1b/Ces1c,CKMT2,CNP,COL6A2,COPA,COPB1,CPOX,CPT1A,CTBS,CTNNA2,CTSA,CTSH,CTSZ,CXADR,DCAF8,DPP7,EEF1A1,EIF3A,ELOVL5,FABP2,FADS2,FDXR,FMO3,FTL,G6PC,GAA,GALNS,GGH,GM2A,GUSB,GYS2,HDLBP,HIST2H2AC,HRAS,IDE,IGKC,ISG15,ITGAV,KCNMA1,Krt10,KRT13,KRT18,KRT8,LYZ,MGLL,MOGS,MTRR,Mup1 (includes others),MVP,OAT,OPLAH,OS9,PAICS,Pcmt1,…	134 (52)	50	MYC	BLM,imatinib,RACK1		CDKN1A	Ins1
tenoxicam	chemical drug		3		0.103	1.05e-11	Akt,AKT1,Cdc42,Creb,ERBB2,IGF1R,MDM2,MPO,NFkB (complex),PI3K (complex),PLG,PPARA,PPARG,PTEN,PTGS1,PTGS2,STK11,tenoxicam,TP53	ABCD2,ACOT2,ACP6,ACSS2,ACY3,AK2,AKAP1,ATP5S,BCL2L1,C8A,CENPE,Ces1b/Ces1c,CKMT2,COL6A2,COPB1,CPOX,CTSA,CTSZ,CYP2S1,EEF1A1,EIF3A,ELOVL5,FABP2,FADS2,FDXR,FHIT,G6PD,GLA,GLB1,HDLBP,HPD,HRAS,ISG15,ITGAV,KCNMA1,KRT1,Krt10,KRT17,KRT18,KRT5,KRT6B,LYZ,MGLL,Mup1 (includes others),MVP,NEU1,OAT,PAICS,Pcmt1,PDK2,PECR,PEX11A,PLIN3,PSAP,PSMA1,RAB5A,RALA,RPL10,RPL12,RPL17,RPL23,Rpl34 (includes others),Rpl36,RPL5,…	95 (19)	17					PTGS2
NMBR	G-protein coupled receptor		3	Inhibited	-2.694	1.05e-11	Akt,Ap1,BCL2,CDKN1B,CEBPB,CHUK,CREB1,CSF1,EGFR,ERK,ERK1/2,ESR1,FOS,FOXO1,GAB1,GATA4,HIF1A,HRAS,HSF1,IKBKB,KAT5,KLF4,MAPK1,Mek,MYOD1,NCOA1,NFE2L2,NFkB (complex),NMBR,NR4A1,P38 MAPK,p70 S6k,POU5F1,PPARG,RAF1,RARA,RELA,RUNX1,SHC1,SREBF1,SREBF2,TP53,TWIST1	AGPAT3,ANO10,ANPEP,AP3B1,ARSB,ATP5S,BCLAF1,BHMT,CDK5RAP3,CELA1,CELSR3,Ces1b/Ces1c,COPA,COPB1,COPB2,CPOX,CREG1,CTNNA2,CTSH,CTSZ,DDB1,DDX25,EEF1A1,EIF4E,FADS2,FARS2,FHIT,FTL,GAA,GLA,GLB1,GM2A,HDLBP,HIST2H2AC,HRAS,IDE,Ighg2b,IGKC,ISG15,ITGAV,KCNMA1,KIAA0391,KRT1,Krt10,KRT13,KRT17,KRT6B,MAVS,MGLL,MINOS1,MRPL45,MRPL47,MRPL55,MVP,NCL,NLN,NUTF2,OAT,OS9,Pcmt1,PDK2,PDXK,PLD3,PLSCR1,PPT2,PRCP,PRG2,PSAP,PSM…	124 (43)	42
alpha-pinene	chemical reagent		3		-0.894	1.18e-11	alpha-pinene,BCL2,CHUK,ERK,MAPK9,MPO,MTOR,NFKBIA,PLG,PTGS2,REL,TP53	ACSS2,AK2,ARG1,ATP5S,BCL2L1,BGN,CENPE,Ces1b/Ces1c,CKMT2,CNP,COL6A2,COPB1,CPOX,CPT1A,CTSZ,CYP2S1,EEF1A1,EIF3A,EIF4E,FADS2,FDXR,GLB1,GM2A,HDLBP,HRAS,Ighg2b,ISG15,ITGAV,KCNMA1,Krt10,KRT18,KRT8,LYZ,NCL,OAT,Pcmt1,PDK2,PLD3,PLSCR1,PSAP,PSMA1,RAB5A,RALA,RPL10,RPL23,RPL27A,Rpl34 (includes others),Rpl36,RPL5,RPL7,RPL8,RPS12,RPS16,RPS18,RPS19,RPS2,RPS20,RPS25,RPS26,RPS27L,RPS3,RPS5,RPSA,SCD,SCO2,SCPEP1,SGP…	80 (12)	10					NFKBIA
PRKAA1	kinase		2		-1.238	1.31e-11	26s Proteasome,ACACA,AKT1,AMPK,CAV1,ERK,ERK1/2,GPAM,HRAS,MAPK1,NFE2L2,NFkB (complex),NFKB1,NFKBIA,P38 MAPK,p70 S6k,PI3K (complex),PNPLA2,PRKAA,PRKAA1,PRKAA2,RELA,SIRT1,STAT3,TSC2	ACOT2,ACSS2,AGPAT3,AK2,ANPEP,ARG1,ARSB,BCLAF1,BGN,CELA1,CENPE,Ces1b/Ces1c,COPB2,CREG1,CTNNA2,CTSA,CTSZ,DPP7,EEF1A1,ERMP1,FDXR,FTL,G6PC,G6PD,GLA,GM2A,GUSB,IDE,Ighg2a,IGKC,KRT17,KRT8,LYZ,MGLL,MOGS,MVP,NEU1,NLN,OAT,PCYT1A,PEX1,PEX11A,PLD3,PPT2,PRELP,PSAP,PSMA1,PSMD13,RAB5A,RACK1,RALA,RPL23,RPL30,RPL8,RPLP0,RPS10,RPS16,RPS18,RPS2,RPS3,RPS6,RPSA,SCD,SCO2,SCPEP1,SERPINF1,SLC25A4,SMPDL3A,SPTBN1,SUOX,TAL…	79 (25)	25	2-deoxyglucose,acadesine,ADIPOQ,GFPT1	Ins1,NAGLU,oleic acid,palmitic acid		AMPK,CAT,GSTA1,NFE2L2,PRKAA,TP53	ARHGDIB,CENPF,DOCK4,ELOVL2,GPAM,HRAS,NFKBIA,TSC2
S-nitrosoglutathione	chemical toxicant		2		-1.166	1.31e-11	26s Proteasome,AKT1,CFTR,ERK,ERK1/2,HIF1A,HRAS,LIPE,MAPK1,MAPK14,NFkB (complex),P38 MAPK,PI3K (complex),PPARG,S-nitrosoglutathione,STAT1,TP53	ACSS2,ANPEP,ARG1,ARSB,ATP5S,BCL2L1,BGN,BHMT,CENPE,Ces1b/Ces1c,CKMT2,COL6A2,COPB1,COPB2,CPOX,CTNNA2,CTSA,CTSH,Cyp2c40 (includes others),EEF1A1,EIF4E,FABP2,FADS2,FDXR,G6PD,GLA,GLB1,GUSB,HDLBP,HIST2H2AC,HRAS,IGKC,ITGAV,KCNMA1,KRT17,KRT8,LYZ,MGLL,NLN,OAT,Pcmt1,PCYT1A,PDK2,PPT2,PRDX1,PSAP,PSMA1,RAB5A,RPL10,RPL12,RPL23,RPL27A,RPL30,Rpl34 (includes others),Rpl36,RPL5,RPL7,RPS10,RPS12,RPS16,RPS18,RPS19,R…	89 (17)	17				CDKN1A,CFTR,HRAS,MAPK3,NFKBIA,PTGS2,TP53	CAT,creatine kinase,IRS2,NQO1
CYP1A1	enzyme		3		-0.679	1.4e-11	2-acetylaminofluorene,9,10-dimethyl-1,2-benzanthracene,AHR,aristolochic acid I,benzo(a)pyrene,benzo(a)pyrene 7,8-dihydrodiol,CHUK,CYP1A1,CYP1B1,ERK,ERK1/2,HRAS,Jnk,JUN,MAP2K4,NR1I2,P38 MAPK,polycyclic aromatic hydrocarbons,STAT1,TP53	ACSS2,ARG1,ASS1,ATP5S,BCL2L1,BGN,CENPE,Ces1b/Ces1c,CKMT2,COL6A2,COPB1,COPB2,CPOX,CTSH,CTSZ,DDB1,EEF1A1,FDXR,FMO3,G6PD,GLB1,GM2A,HDLBP,HRAS,IGKC,KCNMA1,KRT8,MOGS,Mup1 (includes others),Nat8f2,NLN,OAT,Pcmt1,PCYT1A,PDK2,PLD3,PLSCR1,PRDX1,PSAP,PSMA1,RAB5A,RPL10,RPL12,RPL27A,RPL30,Rpl34 (includes others),Rpl36,RPL5,RPL7,RPS10,RPS12,RPS16,RPS18,RPS19,RPS20,RPS25,RPS26,RPS27L,RPS3,RPS5,RPS6,SCD,SCO2,SCP…	78 (20)	16	3-methylcholanthrene,benzyloxycarbonyl-Leu-Leu-Leu aldehyde,pirinixic acid,sulindac sulfide,TP53	arsenite,colcemid,genistein,harmine,Ins1,Insulin,NCX-4040		CCND1,CYP,GSTA1,NQO1,QKI,RBBP4
mir-451	microRNA		3		0.905	1.49e-11	Akt,AKT1,catalase,Cdc42,Creb,ERBB2,IGF1R,MAPK1,MDM2,mir-451,NFkB (complex),P38 MAPK,PI3K (complex),PPARA,PPARG,PTEN,PTGS2,SP1,STK11,TP53	ABCD2,ACOT2,ACP6,ACSS2,ACY3,AK2,AKAP1,ANPEP,ARSB,ATP5S,BCL2L1,BGN,C8A,CENPE,Ces1b/Ces1c,CKMT2,COL6A2,COPB1,CPOX,CTNNA2,CTSA,CTSZ,EEF1A1,EIF3A,ELOVL5,EMC4,FABP2,FADS2,FDXR,FHIT,G6PD,GLA,GLB1,HDLBP,HPD,HRAS,ITGAV,KCNMA1,KRT1,Krt10,KRT18,KRT5,KRT6B,LYZ,MGLL,Mup1 (includes others),NEU1,OAT,PAICS,Pcmt1,PCYT1A,PDK2,PECR,PEX11A,PLIN3,PLSCR1,PPT2,PSAP,PSMA1,RAB5A,RPL10,RPL12,RPL17,RPL23,Rpl34 (includes o…	99 (20)	19		sirolimus		PTGS2	RAB14,RAC1,RASA1,ZNF148
PRMT1/PRMT2	group		3		0.513	1.51e-11	ESR1,HNRNPK,let-7,P38 MAPK,PRMT1,PRMT1/PRMT2,PRMT2,Rar,Retinoic acid-RAR-RXR,Rxr,TP53,tretinoin	ANO10,ANPEP,AP3B1,ASS1,ATP5S,BCLAF1,BGN,BHMT,Ces1b/Ces1c,CKMT2,COL6A2,COPA,COPB1,CPOX,CPT1A,CREG1,CTSH,CXADR,CYP2S1,EIF5,FDXR,FTL,G6PC,G6PD,GLB1,GM2A,HDLBP,HNRNPF,HNRNPK,HRAS,IDE,ISG15,ITGAV,KCNMA1,KRT1,Krt10,KRT5,KRT72,KRT8,LYZ,MINOS1,MVP,NCL,NLN,Nnt,OAT,OS9,PAICS,Pcmt1,PCYT1A,PDK2,PEX1,PLA2G15,PLSCR1,PRELP,PSAP,PSMA1,RAB5A,RPL10,RPL12,Rpl34 (includes others),Rpl36,RPL5,RPL6,RPL7,RPS12,RPS16,RPS…	95 (12)	9
harmine	chemical - endogenous non-mammalian		3		-0.775	1.55e-11	AHR,AKT1,Alp,benzo(a)pyrene,CCND1,CDKN2A,CEBPA,Creb,CTNNB1,CYP1A1,E2F1,EGFR,EIF4E,ERBB2,ERK1/2,ESR1,GLI1,harmine,HIF1A,HNF4A,IGF1R,IL6,JUN,MAP2K1,MAPK9,Mek,MITF,MSH2,MTOR,NANOG,NFKBIA,NOTCH1,PGR,PI3K (complex),PPARG,PRL,RAF1,STAT3,tanespimycin,TP53,TSC2	ACSS2,ACY3,AK2,ANO10,ANPEP,AP3B1,ATP5S,BCL2L1,BHMT,CENPE,Ces1b/Ces1c,CKMT2,CNP,COL6A2,COPA,COPB1,CPOX,CPT1A,CTBS,CTSA,CTSC,CTSH,CTSZ,CXADR,DDB1,DGUOK,DPP7,EEF1A1,EIF3A,EIF4E,EIF5,FABP2,FDXR,FMO3,G6PC,GAA,GGH,GLA,GLB1,GM2A,GUSB,HDLBP,HIST2H2AC,HNRNPK,HPD,HRAS,IDE,IGKC,ISG15,ITGAV,KCNMA1,KIAA0391,Krt10,KRT18,KRT72,KRT8,LYZ,MGLL,MINOS1,MOGS,Mup1 (includes others),MVP,NEU1,NUTF2,OAT,OS9,PAICS,Pcmt1,P…	135 (41)	39				TP53	CYP1A1,FOS,PTGS2
raclopride	chemical drug		3	Activated	2.331	1.72e-11	Ap1,APP,BCL2,CDKN1B,CEBPB,EGFR,ERBB2,ESR1,FOS,GAB1,GATA4,HIF1A,HSF1,JUN,KAT5,KLF4,L1CAM,MAP2K1,MAPK1,MAPK3,MED1,NCOA1,NFE2L2,NFkB (complex),NFKBIA,NR4A1,p70 S6k,POU5F1,PPP1R1B,raclopride,RAF1,RARA,SHC1,SP1,SREBF1,SREBF2,TP53,TWIST1,XBP1	ACP6,AGPAT3,AK2,ANO10,ANPEP,AP3B1,ARSB,ASS1,ATP5S,BCL2L1,BCLAF1,CELA1,CELSR3,Ces1b/Ces1c,CKMT2,COPA,COPB2,CPOX,CREG1,CTNNA2,CTSZ,DDB1,DDX25,EEF1A1,EIF4E,FADS2,FARS2,FDXR,FTL,GLB1,GM2A,GUSB,HDLBP,HIST2H2AC,HRAS,IDE,Ighg2b,IGKC,ISG15,ITGAV,KCNMA1,KIAA0391,Krt10,KRT13,KRT17,KRT6B,MINOS1,MOGS,MVP,NCL,NUTF2,OAT,OS9,PAICS,Pcmt1,PCYT1A,PDK2,PLD3,PLSCR1,PPT2,PRG2,PSAP,PSMA1,PSMD13,RACK1,RNASET2,RPL10,RPL…	115 (39)	37				FOS,PPP1R1B	MAPK3
IL21R	transmembrane receptor		3		-0.097	1.93e-11	Creb,EGFR,EIF4E,ERK,ERK1/2,ESR1,ESR2,estrogen receptor,EZH2,HNF4A,IL10RA,IL21R,IL2RG,INPP5D,JAK,JAK1,JAK2,JAK3,MAPK1,PPARA,PPARG,PRL,RAF1,RELA,SHC1,STAT3,STAT5A,STAT5B,STAT6,TEC/BTK/ITK/TXK/BMX,TP53	ABCD2,ACOT2,ACY3,ANO10,AP3B1,ARSB,ATP5S,BCLAF1,BHMT,C8A,CELA1,CENPE,CKMT2,COL6A2,COPA,COPB1,CTNNA2,CTSA,CTSC,CTSZ,CXADR,Cyp2c40 (includes others),CYP2S1,DGUOK,EEF1A1,EIF4E,ELOVL5,FABP2,FADS2,FMO3,FTL,FUCA1,GM2A,GYS2,HAO2,HDLBP,HPD,IDE,Ighg2b,ISG15,KIAA0391,KRT1,Krt10,KRT5,KRT72,MGLL,MINOS1,Mup1 (includes others),MVP,NCL,Nnt,NUTF2,OAT,OS9,Pcmt1,PEX1,PLIN3,PPT2,PRG2,PSAP,PSMA1,RPL10,RPL12,Rpl34 (in…	107 (31)	28	IL15	TP53		JAK
trichosanthin	chemical drug		2		-0.63	2.03e-11	BAX,CCR1,CCR2,CCR3,TP53,trichosanthin	ACSS2,ARG1,ATP5S,BCL2L1,BGN,CENPE,Ces1b/Ces1c,CKMT2,COL6A2,COPB1,CPOX,CPT1A,CTSH,EEF1A1,FDXR,G6PC,GLB1,HDLBP,HRAS,ISG15,ITGAV,KCNMA1,KRT18,KRT8,LYZ,MVP,OAT,Pcmt1,PDK2,PRELP,PRG2,PSAP,PSMA1,RPL10,RPL12,Rpl34 (includes others),Rpl36,RPL5,RPL7,RPS12,RPS16,RPS18,RPS19,RPS20,RPS25,RPS26,RPS27L,RPS3,RPS5,SCD,SCO2,SCPEP1,SGPL1,SLC25A4,SRSF3,TALDO1,TANK,TKT,TMEM97,Tpm1,TXN2,VIM,YBX1	63 (6)	5				TP53
methotrexate	chemical drug		2		-1.688	2.08e-11	Akt,AMPK,ERK1/2,IKBKB,Jnk,MAP3K7,methotrexate,NFkB (complex),NFKBIA,P38 MAPK,TP53	ACSS2,AGPAT3,AK2,ASS1,ATP5S,BGN,BHMT,C8A,CENPE,Ces1b/Ces1c,CKMT2,COL6A2,COPB1,CPOX,CPT1A,CTSH,CTSZ,EEF1A1,FDXR,FHIT,G6PC,GLA,GLB1,GM2A,HDLBP,HRAS,KCNMA1,KRT17,KRT6B,LYZ,MVP,OAT,Pcmt1,PCYT1A,PDK2,PECR,PEX7,PLD3,PLSCR1,PRDX1,PSAP,PSMA1,RAB5A,RPL10,RPL12,RPL27A,Rpl34 (includes others),Rpl36,RPL5,RPL7,RPL8,RPS12,RPS16,RPS18,RPS19,RPS2,RPS20,RPS25,RPS26,RPS27L,RPS3,RPS5,RPSA,SCD,SCO2,SCPEP1,SGPL1,SLC2…	79 (11)	11				AMPK,CDH1,CDKN1A,FASN,GPAM,HSD17B4,PPARA,TP53	ACOX1,AMD1,APEX1,CCL11,CCND1,GSTA1,MAPK3,NFKBIA,NQO1,SPP1
fingolimod phosphate	chemical - endogenous mammalian		3	Inhibited	-2.245	2.2e-11	ABCB4,APP,Creb,CREM,CSF1,DUSP1,ERK,fingolimod phosphate,FOS,HIF1A,HSF1,JUN,MAPK1,MAPK3,MCL1,MED1,MTOR,NFE2L2,NFKBIA,Nr1h,NR1H4,P glycoprotein,p70 S6k,S1PR1,SMAD2,SREBF1,SREBF2,TGFB1,TP53,XBP1	ABCD2,ACP6,ACY3,AGPAT3,AK2,ARSB,ASS1,ATP5S,BGN,CELA1,CENPE,Ces1b/Ces1c,CKMT2,CNP,COL6A2,COPB2,CPOX,CREG1,CTNNA2,CTSZ,DDB1,EEF1A1,EIF3A,EIF4E,FABP2,FADS2,FARS2,FDXR,G6PC,G6PD,GARS,GLB1,GM2A,HDLBP,HIST2H2AC,HRAS,IDE,KCNMA1,KRT1,MGLL,MIA3,MOGS,OAT,Pcmt1,PCYT1A,PDK2,PDXK,PEX11A,PLD3,PLIN3,PPT2,PSAP,PSMA1,PSMD13,RACK1,RNASET2,RPL10,RPL12,RPL22,RPL23,RPL27A,Rpl34 (includes others),Rpl36,RPL5,RPL7,RPL8,…	105 (30)	26				MAPK3
OXTR	G-protein coupled receptor		3	Inhibited	-3.087	2.32e-11	AGT,Akt,AKT1,Ap1,APP,Cdc42,CDKN1B,CEBPB,Creb,CREB1,CREM,CSF1,CTNNB1,EGFR,EGR1,EPB41,ERBB2,ERK,ERK1/2,ESR1,FOS,FOXO1,FOXO3,GAB1,GATA4,HIF1A,HRAS,HSF1,ITCH,JAK2,JUN,KAT5,KLF4,KRAS,L1CAM,MAPK1,MAPK3,MCL1,MED1,Mek,NCOA1,NFE2L2,NFkB (complex),NFKBIA,NR4A1,OXTR,P38 MAPK,p70 S6k,PGR,PI3K (complex),POU5F1,RAC1,RAF1,RARA,RUNX1,SHC1,SP1,SREBF1,SREBF2,STAT5B,TP53,XBP1	ACP6,ACY3,AGPAT3,AK2,ANO10,ANPEP,AP3B1,ARG1,ARSB,ASS1,ATP5S,BCL2L1,BCLAF1,BHMT,CDK5RAP3,CELA1,CELSR3,COL6A2,COPA,CREG1,CTBS,CTNNA2,CTSA,CTSZ,DDB1,DDX25,EEF1A1,EIF4E,EIF5,FADS2,FARS2,FDXR,FHIT,FTL,GLA,GLB1,GM2A,HDLBP,HIST2H2AC,HRAS,IDE,IGKC,ISG15,ITGAV,KCNMA1,KIAA0391,KRT1,Krt10,KRT13,KRT6B,MAVS,MINOS1,MOGS,MRPL45,MRPL47,MRPL55,MTRR,Mup1 (includes others),MVP,NCL,NLN,NUTF2,OS9,PAICS,Pcmt1,PCYT1A,P…	136 (62)	60				MAPK3
palmitic acid	chemical - endogenous mammalian		2		-0.887	2.35e-11	26s Proteasome,Akt,AKT1,BAX,CEBPB,DDIT3,EIF2S1,ERK,ERK1/2,FAS,FOXO1,IGF1R,IKBKB,INSR,IRS2,LIPE,MAPK1,MAPK14,MAPK9,NFkB (complex),NFKBIA,P38 MAPK,palmitic acid,PI3K (complex),PPARA,PRKAA1,PTEN,RELA,SIRT1,TLR4,TP53,UCP1	ABCD2,AK2,AKAP1,ANPEP,ARSB,BCL2L1,BCLAF1,BHMT,C8A,CDK5RAP3,CENPE,Ces1b/Ces1c,CKMT2,COL6A2,COPB1,CPOX,CTNNA2,CTSA,CTSC,CTSH,CTSZ,EEF1A1,EIF4E,ELOVL5,ERMP1,FABP2,FADS2,FDXR,FHIT,FTL,G6PC,G6PD,GARS,GLA,GLB1,GM2A,GPX4,HPD,HRAS,Ighg2a,IGKC,ITGAV,KCNMA1,KRT5,LYZ,MAVS,MRPL45,MRPL47,MRPL55,Mup1 (includes others),NCL,NEU1,OAT,Pcmt1,PDK2,PLD3,PPT2,PRDX1,PRG2,PSAP,PSMA1,RAB5A,RPL10,RPL12,RPL23,RPL27A,Rpl34 …	103 (32)	32	D-glucose,linolenic acid	arachidonic acid,ELOVL5,troglitazone		15-deoxy-delta-12,14 -PGJ 2,ADIPOQ,AMPK,CDKN1A,DDIT3,FASN,FOS,GCG,HSPA5,IGF1R,PPP2R2B,PTGS2,Rar,SREBF1,TP53,XBP1	ACLY,GCK,glycogen,Ikb,Ins1,Insulin,IRS2,MLXIPL,NFE2L2,NFKBIA,PRKAA,PRKAA1,PTPN2,sphingomyelin,TXNIP
4-oxo-2-nonenal	chemical toxicant		2		0	2.37e-11	26s Proteasome,4-oxo-2-nonenal,Hsp90,STK11,TP53	ACP6,ACSS2,AK2,ARG1,ASS1,ATP5S,CENPE,Ces1b/Ces1c,CKMT2,COL6A2,COPB1,CPOX,CPT1A,CTSA,CTSH,EEF1A1,EIF3A,FDXR,G6PC,GLB1,HDLBP,HRAS,ISG15,ITGAV,KCNMA1,KRT18,KRT8,LYZ,MVP,OAT,Pcmt1,PDK2,PSAP,PSMA1,RPL10,RPL12,Rpl34 (includes others),Rpl36,RPL5,RPL7,RPS12,RPS16,RPS18,RPS19,RPS20,RPS25,RPS26,RPS27L,RPS3,RPS5,RPS6,SARDH,SCD,SCO2,SCPEP1,SGPL1,SLC25A4,SRSF3,STARD10,TALDO1,TANK,TKT,TMEM97,Tpm1,TXN2,TXNRD1,V…	68 (5)	4				TP53
CA3	enzyme	1.012	3		-0.271	2.41e-11	Akt,AKT1,Alpha catenin,CA3,CD247,CDH1,CDKN1A,CHUK,Creb,CTNNB1,DAG1,EGFR,EGR1,EIF4E,ERBB2,ERK,ERK1/2,ESR1,estrogen receptor,ETS1,Focal adhesion kinase,FOS,HINT1,HNRNPK,HRAS,IGF1R,IKBKB,IRF4,JUN,KRAS,MAP2K3,MAP2K6,MAPK1,MAPK14,MAPK9,NANOG,NFkB (complex),NFKB1,NFKBIA,NOS2,PI3K (complex),PKD1,RAF1,RAS,RB1,SHC1,SPTAN1,SRC,STAT3,STAT5A,STAT5B,TP53	ACOT2,ACSS2,ACY3,AK2,ANO10,ANPEP,AP3B1,ARL1,ARSB,ATP5S,BCL2L1,BCLAF1,BHMT,CENPE,Ces1b/Ces1c,CKMT2,CNP,COL6A2,COPA,COPB1,COPB2,CTNNA2,CTSC,CTSZ,DDB1,DGUOK,DNASE2,EIF3A,EIF4E,EIF5,ELOVL5,FABP2,FADS2,FARS2,FHIT,FTL,GLA,GLB1,GM2A,GYS2,HDLBP,HGD,IGKC,KIAA0391,KRT1,Krt10,KRT13,KRT18,KRT8,MGLL,MINOS1,MOGS,MRPL55,MTRR,Mup1 (includes others),NCL,NLN,NUTF2,OS9,PAICS,Pcmt1,PCYT1A,PDK2,PECR,PEX1,PEX11A,PLD3,…	123 (52)	51	Insulin			Focal adhesion kinase
HSPA1A/HSPA1B	enzyme		2		1.238	2.5e-11	BID,DUSP1,EGFR,ERK,ERK1/2,HSPA1A/HSPA1B,Jnk,MAP2K3,MAP2K6,MAPK14,NFkB (complex),NFKBIA,P38 MAPK,RELA,TP53	ACSS2,AK2,ARG1,ARL1,ASS1,ATP5S,BGN,BHMT,CENPE,Ces1b/Ces1c,CKMT2,COL6A2,COPB1,CPOX,CPT1A,CTSH,CTSZ,EEF1A1,EIF4E,FDXR,GLA,GLB1,GM2A,HDLBP,HRAS,KCNMA1,KIAA0391,KRT17,KRT6B,KRT8,LYZ,MGLL,MVP,NCL,NUTF2,OAT,Pcmt1,PDK2,PEX11A,PLD3,PLSCR1,PRDX1,PSAP,PSMA1,RAB5A,RPL10,RPL12,RPL27A,Rpl34 (includes others),Rpl36,RPL5,RPL7,RPL8,RPS12,RPS16,RPS18,RPS19,RPS2,RPS20,RPS25,RPS26,RPS27L,RPS3,RPS5,RPSA,SCD,SCPEP1,S…	79 (15)	14	AGT,alvespimycin,CCND1,genistein,ING1,PRKACA,tanespimycin			FOS,MAPK3,NFKBIA,PTK2,XBP1	CAT,CDKN1A,MAP2K6,MAP3K5
AZD5438	chemical drug		2		0.384	2.52e-11	AZD5438,CDK2,CDK9,TP53	ACSS2,ATP5S,BCL2L1,CENPE,Ces1b/Ces1c,CKMT2,COL6A2,COPB1,CPOX,CPT1A,CTSH,EEF1A1,FDXR,G6PC,G6PD,GLB1,HDLBP,HRAS,ISG15,ITGAV,KCNMA1,KRT18,KRT8,LYZ,MVP,OAT,Pcmt1,PCYT1A,PDK2,PSAP,PSMA1,RPL10,RPL12,Rpl34 (includes others),Rpl36,RPL5,RPL7,RPS12,RPS16,RPS18,RPS19,RPS20,RPS25,RPS26,RPS27L,RPS3,RPS5,SCD,SCO2,SCPEP1,SGPL1,SLC25A4,SRSF3,TALDO1,TANK,TKT,TMEM97,Tpm1,TXN2,VIM,YBX1	61 (4)	3					TP53
ADIPOQ	other		2		0	2.56e-11	ADIPOQ,Akt,AKT1,CTNNB1,EGFR,FOS,IGF1R,JAK2,MAPK14,MAPK8,MTOR,NFkB (complex),NFKBIA,p70 S6k,PI3K (complex),PPARA,STAT3,STK11,TNF,TP53,Vegf	ABCD2,ACOT2,ACP6,ACSS2,AK2,ANPEP,ARG1,ATP5S,BGN,C8A,CENPE,Ces1b/Ces1c,CHIA,CKMT2,CNP,COPB1,CPOX,CTSC,CTSH,EEF1A1,EIF3A,EIF4E,ELOVL5,FADS2,FARS2,FDXR,FHIT,G6PC,G6PD,GLA,GLB1,GPX4,GUSB,HDLBP,HPD,HRAS,IDE,IGKC,KCNMA1,KIAA0391,KRT5,LYZ,Mup1 (includes others),MVP,NCL,NUTF2,Pcmt1,PCYT1A,PDK2,PECR,PEX1,PEX11A,PLSCR1,PRDX1,PSAP,PSMA1,RPL10,RPL12,RPL23,RPL27A,Rpl34 (includes others),Rpl36,RPL5,RPL7,RPL8,R…	104 (21)	21	AGT,BSCL2,Creb,docosahexaenoic acid,GCG,GIP,irbesartan,LGALS3,nicotinic acid,palmitic acid,thiazolidinedione,troglitazone	DOK1,L-triiodothyronine,N-cor,N-nitro-L-arginine methyl ester,NCOR1,PML,SNAI1,SPP1		ACLY,ACOX1,CDKN1A,GCK,IGF1R,PFKFB1,PRKAA,PRKAA1,PTGS2	CCND1,Ikb,PTK2
genistein	chemical drug		2		0.818	2.64e-11	AHR,Akt,AKT1,AMPK,Ap1,AR,BCAR1,BCL2,CD247,CFTR,Creb,CREB1,CTNNB1,EGFR,ERK1/2,ESR1,ESR2,FGFR3,genistein,INSR,JAK2,KAT5,MAPK1,MAPK14,MBD2,NFkB (complex),NFKBIA,PI3K (complex),RAC1,RAS,SRF,STAT3,TLR4,TP53	ACOT2,ACSS2,ACY3,AK2,AMY2A,ANO10,AP3B1,ARG1,ARSA,ARSB,ATP5S,BCL2L1,BCLAF1,BHMT,Ces1b/Ces1c,CKMT2,COL6A2,COPA,COPB1,CPOX,CTNNA2,CTSA,CTSH,CTSZ,CXADR,Cyp2c40 (includes others),DCAF8,DDB1,DNASE2,EIF4E,FABP2,FADS2,FDXR,FHIT,FMO3,FUCA1,GAA,GALNS,GLA,GLB1,GM2A,GUSB,HDLBP,Ighg2b,Igkv1-117,KCNMA1,KIAA0391,KRT1,KRT6B,MANBA,MINOS1,Mup1 (includes others),NCL,NEU1,NUTF2,OS9,Pcmt1,PDK2,PDXK,PECR,PEX1,PEX11A,P…	121 (34)	34				AMPK,CAT,CCND1,CDKN1A,CFTR,CTSA,CYP,FOS,GNPTAB,GUSB,HSPA1A/HSPA1B,Ins1,MDC1,NAGLU,NFE2L2,RAB14,SH2B2,SPP1,TFEB,TP53	creatine kinase,Creb,CYP1A1,D-glucose,EPHB1,EPO,Focal adhesion kinase,GAB1,GFPT1,HSPA5,IGF1R,KRT14,MAPK3,MST1R,MYC,NCOR1,NFKBIA,PRLR,PTGS2,PTK2,RAC1,RAS
UBE4B	enzyme		2		0.126	2.83e-11	TP53,TP63,UBE4B	ACSS2,ARG1,ATP5S,BCL2L1,CENPE,Ces1b/Ces1c,CKMT2,COL6A2,COPB1,CPOX,CPT1A,CTSH,EEF1A1,FDXR,G6PC,GLB1,HDLBP,HRAS,ISG15,ITGAV,KCNMA1,KRT1,KRT18,KRT6B,KRT8,LYZ,MVP,OAT,Pcmt1,PDK2,PSAP,PSMA1,RPL10,RPL12,Rpl34 (includes others),Rpl36,RPL5,RPL7,RPS12,RPS16,RPS18,RPS19,RPS20,RPS25,RPS26,RPS27L,RPS3,RPS5,SCD,SCO2,SCPEP1,SERPINF1,SGPL1,SLC25A4,SRSF3,TALDO1,TANK,TKT,TMEM97,Tpm1,TXN2,VIM,YBX1	63 (3)	2					TP53,Ubiquitin
NFAT5	transcription regulator		2		-0.128	2.99e-11	NFAT5,TP53	ACSS2,ATP5S,BCL2L1,CENPE,Ces1b/Ces1c,CKMT2,COL6A2,COPB1,CPOX,CPT1A,CTSH,EEF1A1,FDXR,G6PC,GLB1,HDLBP,HRAS,ISG15,ITGAV,KCNMA1,KRT18,KRT8,LYZ,MVP,OAT,Pcmt1,PDK2,PSAP,PSMA1,RPL10,RPL12,Rpl34 (includes others),Rpl36,RPL5,RPL7,RPS12,RPS16,RPS18,RPS19,RPS20,RPS25,RPS26,RPS27L,RPS3,RPS5,SCD,SCO2,SCPEP1,SGPL1,SLC14A2,SLC25A4,SLC7A2,SRSF3,TALDO1,TANK,TKT,TMEM97,Tpm1,TXN2,VIM,YBX1	61 (2)	2	CDK5,MAP2K6,RAC1				TP53
epigallocatechin-gallate	chemical drug		2		-1.073	3.06e-11	26s Proteasome,ADAM17,Akt,AKT1,AMPK,BAX,CDK2,CDKN1A,CDKN2A,CHUK,EGFR,epigallocatechin-gallate,ERBB2,ERK,Hsp90,IGF1R,JAK2,Jnk,MAPK8,MTOR,NFE2L2,NFkB (complex),NFKBIA,NR1H4,P38 MAPK,PI3K (complex),Pkc(s),PRKCD,PTGS2,RARB,RAS,RELA,SNAI1,SP1,STAT1,STAT3,TP53	ACSS2,AGPAT3,AK2,ANPEP,ARG1,ASS1,ATP5S,BCL2L1,CELA1,CENPE,Ces1b/Ces1c,CKMT2,CNP,COL6A2,COPB1,CPOX,CREG1,CTSA,CTSH,CTSZ,CXADR,EIF3A,EIF4E,FABP2,FHIT,FTL,G6PC,GLA,GLB1,GM2A,HDLBP,HRAS,IDE,ISG15,ITGAV,KCNMA1,KIAA0391,KRT1,Krt10,KRT5,KRT8,MGLL,MVP,NCL,NUTF2,OAT,PAICS,Pcmt1,PCYT1A,PDK2,PECR,PEX1,PEX11A,PLD3,PLSCR1,PRG2,PSAP,PSMA1,PSMD13,RAB5A,RACK1,RPL10,RPL12,RPL17,RPL23,RPL27A,Rpl34 (includes others…	105 (37)	37				AMPK,CAT,CDH1,GADD45B,MAP3K5,NFE2L2,PTGS2,TP53	ADAMTS5,CCND1,D-glucose,FOS,HSPA5,IGF1R,MYC,NFKBIA,RAS,SEMA4D,SNAI1
DNAJC3	other	-1.106	3		1.633	3.14e-11	AKT1,AMPK,CFTR,CHUK,DDIT3,DNAJC3,EIF2AK2,EIF2AK3,EIF2S1,ERK,ERN1,estrogen receptor,FOXO1,FOXO3,HSPA8,IKBKB,MAPK14,NFE2L2,NFkB (complex),NFKBIA,P38 MAPK,STAT3,STK11,TP53,TSC2	ACP6,AGPAT3,AK2,ARG1,ASS1,ATP5S,BGN,BHMT,CDK5RAP3,CELA1,CENPE,COL6A2,COPB1,CPOX,CTSH,CTSZ,Cyp2c40 (includes others),DPP7,EEF1A1,EIF3A,FABP2,FADS2,FDXR,FTL,G6PD,GLB1,GM2A,HDLBP,HRAS,IDE,ISG15,ITGAV,KCNMA1,KRT17,LYZ,MAVS,MGLL,MOGS,MRPL45,MRPL47,MRPL55,MVP,NEU1,OAT,Pcmt1,PDK2,PEX1,PEX11A,PLD3,PLSCR1,PRDX1,PRELP,PSAP,PSMA1,PSMD13,RAB5A,RACK1,RPL10,RPL12,RPL27A,Rpl34 (includes others),Rpl36,RPL5,RPL7,…	96 (25)	22	1,2-dithiol-3-thione,ciprofloxacin,NFE2L2,XBP1				DDIT3,Ins1
RBBP4	enzyme		2		-0.485	3.15e-11	AKT1,ERK,KRAS,RAS,RBBP4,TP53	ACSS2,ANPEP,ASS1,ATP5S,CENPE,Ces1b/Ces1c,CKMT2,COL6A2,COPB1,CPOX,CPT1A,CTSH,CXADR,EEF1A1,EIF5,FDXR,G6PD,GLB1,HDLBP,HRAS,ITGAV,KCNMA1,KRT8,LYZ,MTRR,MVP,OAT,Pcmt1,PDK2,PEX11A,PRDX1,PSAP,PSMA1,RPL10,RPL12,Rpl34 (includes others),Rpl36,RPL5,RPL7,RPS12,RPS16,RPS18,RPS19,RPS20,RPS25,RPS26,RPS27L,RPS3,RPS5,RPS6,RPSA,SCD,SCO2,SCPEP1,SERPINF1,SGPL1,SLC25A4,SPTBN1,SRSF3,TALDO1,TANK,TKT,TMEM109,TMEM97,TXN2,…	68 (6)	5	CYP1A1,PRKACA			KRAS,RAS
PPP2R5C	other		2		-0.114	3.19e-11	AKT1,CDKN1B,NFkB (complex),NFKBIA,PPP2R5C,RAF1,TP53	ACSS2,AK2,ASS1,ATP5S,BCL2L1,CENPE,CKMT2,COL6A2,COPB1,CPOX,CPT1A,CTSH,CTSZ,DDX25,EEF1A1,FDXR,G6PC,GLA,GLB1,GM2A,HDLBP,HRAS,ISG15,ITGAV,KCNMA1,KIAA0391,KRT17,KRT18,KRT6B,LYZ,MGLL,MVP,OAT,Pcmt1,PDK2,PEX11A,PLD3,PPT2,PSAP,PSMA1,RPL10,RPL12,RPL27A,Rpl34 (includes others),Rpl36,RPL5,RPL7,RPL8,RPS12,RPS16,RPS19,RPS20,RPS25,RPS26,RPS27L,RPS3,RPS5,RPSA,SCD,SCO2,SCPEP1,SERPINF1,SGPL1,SKP2,SLC25A4,SNRPD1,SP…	77 (7)	7	imatinib,PRKAA				NFKBIA,TP53
KCNA3	ion channel		3		0.498	3.24e-11	Akt,Ap1,AR,ATF4,Creb,CREB1,CREBBP,CTNNB1,ERK1/2,FOS,JAK2,Jnk,KCNA3,MAPK14,NFE2L2,PPARG,Rar,SP1,SPI1,STAT3,STAT5A,STAT5a/b,STAT5B,TP53	ACSS2,ACY3,AGPAT3,ATP5S,BCL2L1,BGN,BHMT,CELA1,Ces1b/Ces1c,CKMT2,COL6A2,COPB1,CPT1A,CREG1,CTNNA2,CTSH,EEF1A1,FABP2,FARS2,FDXR,FHIT,FTL,G6PC,G6PD,GAA,GARS,GLA,GLB1,GYS2,HDLBP,HRAS,IDE,ITGAV,KCNMA1,KRT1,KRT18,KRT5,KRT6B,KRT8,LYZ,MOGS,Mup1 (includes others),MVP,Pcmt1,PDK2,PDXK,PEX1,PEX11A,PLIN3,PLSCR1,PRCP,PRDX1,PRG2,PSAP,PSMA1,PSMD13,RACK1,RPL10,RPL12,Rpl34 (includes others),Rpl36,RPL5,RPL7,RPL9,RPL…	101 (24)	23	HOXA7			Ins1	Creb,FOS
S100A4	other		2		0.221	3.26e-11	Akt,BCL2,CHUK,ERK,ERK1/2,MAPK1,Mek,NFkB (complex),NFKBIA,PLG,S100A4,SMAD2,SPP1,TP53	ACSS2,AK2,ANPEP,ARG1,ARSB,ATP5S,BGN,BHMT,CENPE,Ces1b/Ces1c,CKMT2,COL6A2,COPB1,CPOX,CPT1A,CTNNA2,CTSZ,CYP2S1,EEF1A1,EPDR1,FDXR,FHIT,G6PC,GLA,GLB1,GM2A,GPX4,HDLBP,HRAS,Ighg2b,KCNMA1,KRT8,LYZ,OAT,Pcmt1,PDK2,PLD3,PPT2,PSAP,PSMA1,RAB5A,RALA,RPL10,RPL12,RPL23,RPL27A,Rpl34 (includes others),Rpl36,RPL5,RPL7,RPL8,RPS12,RPS16,RPS18,RPS19,RPS2,RPS20,RPS25,RPS26,RPS27L,RPS3,RPS5,RPSA,SCD,SCO2,SCPEP1,SELENOW,…	82 (14)	14	KRAS			MAPK3,NFKBIA	RAC1
mechlorethamine	chemical drug		2		-0.254	3.35e-11	DUSP1,JINK1/2,mechlorethamine,TP53	ACSS2,ATP5S,BCL2L1,CENPE,Ces1b/Ces1c,CKMT2,COL6A2,COPB1,CPOX,CPT1A,CTSH,EEF1A1,FDXR,G6PC,GLB1,HDLBP,HRAS,ISG15,ITGAV,KCNMA1,KRT18,KRT8,LYZ,MGLL,MVP,OAT,Pcmt1,PDK2,PEX11A,PSAP,PSMA1,RPL10,RPL12,Rpl34 (includes others),Rpl36,RPL5,RPL7,RPS12,RPS16,RPS18,RPS19,RPS20,RPS25,RPS26,RPS27L,RPS3,RPS5,SCD,SCO2,SCPEP1,SGPL1,SLC25A4,SRSF3,TALDO1,TANK,TKT,TMEM97,Tpm1,TXN2,VIM,VNN1,YBX1	62 (4)	3				TP53
NUMB/NUMBL	group		3		-0.356	3.39e-11	AKT1,ITCH,MAPK14,MAPK8,NFKB1,NFKBIA,Notch,NOTCH1,NUMB,NUMB/NUMBL,NUMBL,PI3K (complex),TP53	ACSS2,AK2,ASS1,ATP5S,BCL2L1,CENPE,Ces1b/Ces1c,CKMT2,COL6A2,COPB1,CPOX,CTSH,CTSZ,EEF1A1,FDXR,G6PD,GAA,GLB1,GM2A,HDLBP,HRAS,KCNMA1,KRT6B,LYZ,MAVS,MVP,OAT,Pcmt1,PDK2,PEX11A,PLD3,PRDX1,PSAP,PSMA1,RPL10,RPL12,RPL23,RPL27A,Rpl34 (includes others),Rpl36,RPL5,RPL7,RPL8,RPS12,RPS16,RPS18,RPS19,RPS2,RPS20,RPS25,RPS26,RPS27L,RPS3,RPS5,RPSA,SCD,SCO2,SCPEP1,SERPINF1,SGPL1,SLC25A4,SPTBN1,SRSF3,TALDO1,TANK,TKT,…	71 (13)	10
brivudine	chemical drug		3		1.359	3.4e-11	Akt,brivudine,CHUK,ERK1/2,Jnk,NFkB (complex),NFKBIA,NQO1,P38 MAPK,Pkc(s),tanespimycin,TP53	ACSS2,AK2,ASS1,ATP5S,BCL2L1,BGN,BHMT,CENPE,Ces1b/Ces1c,CKMT2,COL6A2,COPB1,CPOX,CPT1A,CTSH,CTSZ,DDX1,EEF1A1,FHIT,G6PC,GLA,GLB1,GM2A,HDLBP,HRAS,KCNMA1,KRT17,KRT6B,LYZ,MVP,OAT,Pcmt1,PDK2,PLD3,PLSCR1,PSAP,PSMA1,RAB5A,RPL10,RPL12,RPL24,RPL27A,RPL30,Rpl34 (includes others),RPL35,Rpl36,RPL5,RPL7,RPL8,RPS12,RPS16,RPS18,RPS19,RPS2,RPS20,RPS25,RPS26,RPS27L,RPS3,RPS5,RPS8,RPSA,SCD,SCO2,SCPEP1,SGPL1,SLC25A4,…	78 (12)	12				NQO1	APEX1
PROK1	growth factor		3	Inhibited	-2.197	3.49e-11	AGT,Akt,AKT1,CD247,Cdc42,CDH1,CDKN1B,CEBPB,CHUK,Creb,CREB1,CSF1,CTNNB1,DAG1,EGFR,EGR1,EIF4E,EPB41,ERBB2,ERK,ERK1/2,ESR1,FOS,FOXO1,FOXO3,GAB1,GATA4,HIF1A,HINT1,HNRNPK,HRAS,HSF1,IGF1R,IKBKB,IRF4,ITCH,JAK2,JUN,KAT5,KLF4,KRAS,L1CAM,MAP2K3,MAPK1,Mek,NCOA1,NFE2L2,NFkB (complex),NFKBIA,NR4A1,P38 MAPK,p70 S6k,PGR,PI3K (complex),PKD1,POU5F1,PROK1,PROKR1,RAF1,RARA,RB1,RELA,RUNX1,SHC1,SP1,SPTAN1,SRC,SREBF1,…	ACOT2,ACY3,AGPAT3,AK2,ANO10,ANPEP,AP3B1,ARG1,ARL1,ARSB,ASS1,BCL2L1,BCLAF1,BHMT,CDK5RAP3,CELA1,CELSR3,CNP,COL6A2,COPA,COPB1,COPB2,CREG1,CTBS,CTNNA2,CTSA,CTSZ,DDB1,DDX25,DGUOK,DNASE2,EEF1A1,EIF3A,EIF4E,EIF5,ELOVL5,FARS2,FDXR,FHIT,FTL,GLA,GLB1,GM2A,GYS2,HDLBP,HGD,HIST2H2AC,HRAS,IGKC,ISG15,ITGAV,KCNMA1,KIAA0391,KRT1,Krt10,KRT13,MAVS,MINOS1,MOGS,MRPL45,MRPL47,MRPL55,MTRR,Mup1 (includes others),MVP,NCL…	140 (71)	69		VHL		PTGS2
MAPK3	kinase		2		-1.748	3.62e-11	Akt,Ap1,APP,BCL2,Creb,CREM,CSF1,DUSP1,ERK,ERK1/2,FOS,HIF1A,HSF1,JUN,MAP2K1,MAPK1,MAPK3,MCL1,MED1,NFE2L2,NFkB (complex),NFKBIA,p70 S6k,SHC1,SMAD2,SREBF1,SREBF2,STAT3,TP53,TWIST1,XBP1	ACP6,ACY3,AGPAT3,AK2,ARSB,ATP5S,BGN,BHMT,CELA1,CENPE,Ces1b/Ces1c,CKMT2,COL6A2,COPB2,CPOX,CREG1,CTNNA2,CTSZ,CXADR,EEF1A1,EIF4E,FADS2,FARS2,FDXR,FHIT,FTL,G6PD,GLA,GLB1,GM2A,GUSB,HDLBP,HIST2H2AC,HRAS,IDE,Ighg2b,KCNMA1,KRT1,KRT17,KRT6B,LYZ,MGLL,MOGS,OAT,Pcmt1,PCYT1A,PDK2,PDXK,PEX1,PEX11A,PLD3,PLIN3,PLSCR1,PPT2,PRDX1,PSAP,PSMA1,PSMD13,RACK1,RNASET2,RPL10,RPL12,RPL22,RPL27A,Rpl34 (includes others),Rpl3…	106 (31)	30	8-bromoguanosine 3',5'-cyclic monophosphate,AGT,arachidonic acid,cocaine,colcemid,CSF2RB,D-glucose,diadenosine triphosphate,Ephb,EPHB1,EPO,FGF3,FGF6,FGF9,FGFR1,fingolimod phosphate,Focal adhesion kinase,GAB1,GIP,HRAS,HSPA1A/HSPA1B,IGF1R,IL15,Ins1,Insulin,MST1R,MUC1,Ngf,OPRD1,OXTR,PIK3CB,pirinixic acid,PLCE1,PPP1R1B,PRL,PTK2,RAC1,RAP2B,RAPGEF3,RAS,S-nitrosoglutathione,S100A4,TCR,tempol,TRH	15-deoxy-delta-12,14 -PGJ 2,amino acids,calpeptin,docosahexaenoic acid,Eph Receptor,EPHB2,genistein,LILRB1,methotrexate,NCK2,NF1,nitrofurantoin,putrescine,raclopride,ranitidine,RAP1GAP,sulindac sulfide,zopolrestat		CCND1,Creb,FOS,LRP6,NFE2L2,NFKBIA,PTGS2,RPS6KA2,SPP1,SREBF1,SREBF2,XBP1
NT5E	phosphatase	-1.072	3		1.166	3.72e-11	26s Proteasome,adenosine,ADORA2A,AKT1,ATP,ATP7B,BCAR1,BCL2L1,BDNF,CDKN1A,CFTR,ciprofloxacin,Focal adhesion kinase,HSF1,JUN,KRAS,MAP3K1,MTOR,NANOG,Nfat (family),NFKB1,NFKBIA,nitric oxide,NR4A2,NT5E,PGR,PPP1R1B,RAF1,SHC1,SLC29A1,TEC/BTK/ITK/TXK/BMX,TGM2,TP53,UCP1	ACOT2,ACSS2,AK2,ARG1,ATP5S,BCL2L1,CENPE,CKMT2,CNP,COL6A2,COPB1,CPOX,CTBS,CXADR,Cyp2c40 (includes others),EIF3A,EIF5,FADS2,FTL,GARS,GLB1,GPX4,GUSB,HDLBP,HNRNPK,HRAS,KIAA0391,KRT18,KRT8,MAN2B2,MGLL,MOGS,MTRR,NLN,NUS1,Pcmt1,PDK2,PEX11A,PLD3,PSAP,PSMA1,RALA,RPL10,RPL13,RPL22,Rpl23a,RPL27A,RPL3,Rpl34 (includes others),RPL35A,Rpl36,RPL37A,RPL5,RPL7,RPL7A,RPL8,RPS12,RPS16,RPS19,RPS20,RPS23,RPS25,RPS26,R…	89 (34)	33	17beta-estradiol-17-beta-D-glucuronide	EFNA2		Focal adhesion kinase	SPP1
ACOX1	enzyme	-1.338	2		1.976	3.82e-11	ACOX1,PPARA	ABCD2,ACOT2,ACSS2,ARG1,ASS1,BCL2L1,C8A,CPOX,CPT1A,CTBS,ELOVL5,FABP2,FADS2,G6PC,G6PD,GPX4,HPD,KRT8,MGLL,Mup1 (includes others),Nat8f2,OAT,PEX11A,PLSCR1,RPL12,Rpl36,RPS24,SARDH,SCD,TALDO1,VNN1	31 (2)	2	ADIPOQ,ALOX5,arachidonic acid,ciprofibrate,clofibric acid,D-glucose,dehydroepiandrosterone sulfate,docosahexaenoic acid,gemfibrozil,oxadiazon,PCGEM1,pirinixic acid,PPARα-RXRα,PRKAA,TRIB1	HSD17B4,L-triiodothyronine,methotrexate,nitrofurantoin,TO-901317		Mup1 (includes others)	CAT,CDKN1A,DDIT3,HSPA5,Kap,LGALS3,NFE2L2,RBM3,TP53,XBP1
3-methylcholanthrene	chemical toxicant		3		0.246	3.83e-11	3-methylcholanthrene,AHR,AKT1,Alp,AR,ARNT,CDKN2A,CEBPB,CHUK,Creb,CREB1,CSF2,CTNNB1,CYP1A2,DDIT3,E2F1,EGF,EGFR,EIF4E,ERBB2,ESR1,FOS,GATA1,HNF1A,HNF4A,HRAS,HSD17B4,IGF1R,IKBKB,IRF4,JUN,MAP3K1,MAPK14,MSH2,MYOD1,NANOG,Nfat (family),NFE2L2,NFkB (complex),NFKBIA,NR1I2,NR4A1,P38 MAPK,PGR,PPARA,PPARG,PRL,RAF1,RHOA,SIRT1,SPP1,tanespimycin,TGFB1,TP53,TSC2	ABCD2,ACOT2,ACSS2,AGPAT3,AK2,ANO10,AP3B1,ASS1,ATP5S,BCLAF1,C8A,CELA1,Ces1b/Ces1c,CKMT2,COL6A2,COPA,COPB1,COPB2,CPOX,CPT1A,CTBS,CTSC,CTSH,CXADR,DGUOK,DNASE2,DPP7,EEF1A1,ELOVL5,EPDR1,ERMP1,FABP2,FARS2,FDXR,FMO3,G6PD,GARS,GLA,GLB1,GPX4,HDLBP,HNRNPK,HPD,HRAS,IDE,Ighg2a,IGKC,ISG15,ITGAV,KCNMA1,KIAA0391,Krt10,KRT17,KRT18,KRT6B,KRT8,LYZ,MAN2B2,MIA3,MINOS1,MOGS,MVP,Nat8f2,NEU1,NLN,NUS1,NUTF2,OAT,OS9,PAIC…	149 (55)	51				CCND1,CYP,CYP1A1,FOS,GSTA1,NQO1,PTGS2,TP53
STX1A	transporter		3		1.324	4.32e-11	CFTR,H2AFX,HDAC2,NFKBIA,PLAU,STX1A,TP53,trabectedin	ACSS2,AK2,ARG1,ATP5S,CENPE,Ces1b/Ces1c,CKMT2,COL6A2,COPB1,CPOX,CPT1A,CTSH,CTSZ,Cyp2c40 (includes others),EEF1A1,FABP2,FADS2,FDXR,G6PC,G6PD,GLB1,GM2A,HDLBP,HRAS,ISG15,ITGAV,KCNMA1,KRT18,LYZ,MVP,Pcmt1,PDK2,PLD3,PSAP,PSMA1,RPL10,RPL12,RPL27A,Rpl34 (includes others),Rpl36,RPL5,RPL7,RPL8,RPS12,RPS16,RPS19,RPS2,RPS20,RPS25,RPS26,RPS27L,RPS3,RPS5,RPSA,SCD,SCO2,SCPEP1,SGPL1,SLC25A4,SPTBN1,SRSF3,TALDO1,TA…	69 (8)	6		DDIT3			CFTR
BANP	other		3		-1.278	4.46e-11	AKT1,AR,BANP,CCND1,CDH1,CDK1,CDKN1B,CDKN2A,CEBPA,E2F1,EIF4E,ERK1/2,ETS1,EZH2,FOS,FOXO1,GLI1,HIF1A,HMGA1,HNF4A,IGF1R,IL6,ING1,IREB2,JUN,JUNB,MAP2K1,MAPK9,MCL1,Mek,MSH2,MTOR,NANOG,NFKBIA,NOTCH1,PGR,PPARG,RB1,RELA,TP53,TSC2	ACSS2,ACY3,AK2,ANPEP,ATP5S,BHMT,CDK5RAP3,CENPE,Ces1b/Ces1c,CKMT2,CNP,COL6A2,COPB1,CPOX,CPT1A,CTBS,CTSC,CTSH,CTSZ,DDB1,DDX25,DGUOK,DPP7,EEF1A1,EIF3A,EIF4E,EIF5,FABP2,FARS2,FDXR,FTL,FUCA1,G6PC,GAA,GGH,GLB1,GM2A,GUSB,HDLBP,HIST2H2AC,HNRNPK,HPD,HRAS,IGKC,ISG15,ITGAV,KCNMA1,KRT13,KRT8,LYZ,MAVS,MGLL,MOGS,MRPL45,MRPL47,MRPL55,MVP,NEU1,OAT,Pcmt1,PDK2,PECR,PLD3,PPT2,PRELP,PRG2,PSAP,PSMA1,RALA,RPL10,RPL12,…	120 (41)	39				CDH1,CDKN1A,TP53	CCND1
NOP53	other		2		0.124	4.71e-11	MDM2,NOP53,PTEN,TP53	ACSS2,AKAP1,ARG1,ATP5S,BCL2L1,CENPE,Ces1b/Ces1c,CKMT2,COL6A2,COPB1,CPOX,CPT1A,CTSH,EEF1A1,FDXR,G6PC,GLB1,HDLBP,HRAS,ISG15,ITGAV,KCNMA1,KRT18,KRT8,LYZ,MVP,NEU1,OAT,Pcmt1,PDK2,PSAP,PSMA1,RPL10,RPL12,Rpl34 (includes others),Rpl36,RPL5,RPL7,RPS12,RPS16,RPS18,RPS19,RPS20,RPS25,RPS26,RPS27L,RPS3,RPS5,RPS6,SCD,SCO2,SCPEP1,SGPL1,SKP2,SLC25A4,SRSF3,TALDO1,TANK,TKT,TMEM97,Tpm1,TRAM1,TXN2,VIM,YBX1	65 (4)	3					TP53
valdecoxib	chemical drug		3		0	4.72e-11	acetaminophen,Akt,AKT1,benzo(a)pyrene,Cdc42,Creb,CYP2C19,CYP2C8,CYP2C9,CYP2D6,CYP3A5,ERBB2,IGF1R,MAPK8,MDM2,paclitaxel,PI3K (complex),PPARA,PPARG,PTEN,PTGS1,PTGS2,STK11,tamoxifen,thalidomide,TP53,valdecoxib	ABCD2,ACOT2,ACP6,ACSS2,ACY3,AK2,AKAP1,ATP5S,BCL2L1,C8A,CENPE,Ces1b/Ces1c,CKMT2,COL6A2,COPB1,CPOX,CTSA,CTSZ,DDB1,EEF1A1,EIF3A,ELOVL5,FABP2,FDXR,FHIT,G6PD,GLB1,HDLBP,HPD,Igkv1-117,ISG15,ITGAV,KCNMA1,KRT1,Krt10,KRT18,KRT5,LYZ,MGLL,Mup1 (includes others),MVP,NEU1,OAT,PAICS,Pcmt1,PDK2,PECR,PEX11A,PLIN3,PRDX1,PSAP,PSMA1,RPL10,RPL12,RPL17,RPL23,Rpl34 (includes others),Rpl36,RPL5,RPL7,RPS10,RPS12,RPS16,R…	90 (27)	21					PTGS2
ARN2508	chemical reagent		3		-0.954	4.76e-11	Akt,AKT1,ARN2508,Cdc42,Creb,ERBB2,FAAH,IGF1R,MDM2,NFkB (complex),PI3K (complex),PPARA,PTEN,PTGS2,STK11,TP53	ABCD2,ACOT2,ACP6,ACSS2,ACY3,AK2,AKAP1,ATP5S,BCL2L1,C8A,CENPE,Ces1b/Ces1c,CKMT2,COL6A2,COPB1,CPOX,CTSA,CTSZ,EEF1A1,EIF3A,ELOVL5,FADS2,FDXR,FHIT,G6PD,GLA,GLB1,HDLBP,HPD,HRAS,ISG15,ITGAV,KCNMA1,KRT1,Krt10,KRT17,KRT5,KRT6B,LYZ,Mup1 (includes others),MVP,NEU1,OAT,PAICS,Pcmt1,PDK2,PECR,PLIN3,PSAP,PSMA1,RPL10,RPL12,RPL17,RPL23,Rpl34 (includes others),Rpl36,RPL5,RPL7,RPS10,RPS12,RPS16,RPS18,RPS19,RPS2,RP…	89 (16)	15				oleoylethanolamide	FAAH,PTGS2
Ep300/Pcaf	complex		3	Inhibited	-2.041	4.79e-11	AKT1,AR,CCND1,CDKN2A,CEBPA,CTNNB1,E2F1,EIF4E,EP300,Ep300/Pcaf,ERBB2,ERK,ESR1,GLI1,IGF1R,IL6,IRF4,IRF7,JUNB,KAT2B,MAP3K1,Mek,MSH2,MTOR,MYOD1,NANOG,NFE2L2,NFkB (complex),NOTCH1,P38 MAPK,PGR,PI3K (complex),RB1,SRF,TFAP2A,TP53,TSC2,XBP1	ACSS2,ACY3,AGPAT3,ANO10,AP3B1,ASS1,ATP5S,BCL2L1,CELA1,CENPE,Ces1b/Ces1c,CKMT2,CNP,COL6A2,COPA,COPB1,COPB2,CPOX,CPT1A,CTBS,CTSC,CTSH,CXADR,DGUOK,DPP7,EEF1A1,EIF3A,EIF5,FDXR,FTL,G6PC,GAA,GGH,GLA,GLB1,HDLBP,HNRNPK,HRAS,IDE,IGKC,Igkv1-117,ISG15,ITGAV,KCNMA1,Krt10,KRT18,KRT8,LYZ,MAN2B2,MINOS1,MRPL55,Mup1 (includes others),MVP,NEU1,OAT,OS9,PAICS,Pcmt1,PDK2,PECR,PLSCR1,PPT2,PRELP,PRG2,PSAP,PSMA1,PSMD13,…	127 (38)	35				TP53
CD3D	transmembrane receptor		3	Inhibited	-3.984	5.03e-11	Akt,AMPK,BCL2,CD247,CD3D,CDKN1B,CEBPB,CREB1,CSF1,EGFR,ERK1/2,ESR1,FOS,GAB1,GATA4,HIF1A,HRAS,HSF1,KAT5,KLF4,L1CAM,LAT,MAPK1,NCOA1,NFE2L2,NFkB (complex),NFKB1,NFKBIA,NR4A1,P38 MAPK,p70 S6k,PI3K (complex),PLCG1,POU5F1,PPARG,RAF1,RARA,RELA,RUNX1,SP1,SREBF1,SREBF2,STAT3,TP53,TWIST1,VAV1	AGPAT3,AK2,ANO10,ANPEP,AP3B1,ARSB,ASS1,ATP5S,BCLAF1,BHMT,CELA1,CELSR3,Ces1b/Ces1c,CKMT2,COPA,COPB1,COPB2,CPOX,CREG1,CTNNA2,CTSZ,DDB1,DDX25,EEF1A1,EIF4E,FADS2,FARS2,FDXR,FHIT,GAA,GLA,GLB1,GM2A,HDLBP,HIST2H2AC,HRAS,IDE,Ighg2b,IGKC,ISG15,ITGAV,KCNMA1,KIAA0391,KRT1,Krt10,KRT13,KRT17,MINOS1,MVP,NCL,NLN,NUTF2,OAT,OS9,Pcmt1,PCYT1A,PDK2,PDXK,PEX1,PLD3,PLSCR1,PPT2,PRCP,PRG2,PSAP,PSMA1,PSMD13,RAB5A,RACK1,R…	122 (46)	43					RAS
IP6K2	kinase		2		0.361	5.15e-11	Akt,AKT1,IP6K2,MAP3K7,STK11,TP53	ACP6,ACSS2,AK2,ASS1,ATP5S,BCL2L1,CENPE,Ces1b/Ces1c,CKMT2,COL6A2,COPB1,CPOX,CPT1A,CTSH,EEF1A1,EIF3A,FDXR,FHIT,GLB1,HDLBP,HRAS,ISG15,ITGAV,KCNMA1,KRT18,KRT8,LYZ,MVP,OAT,Pcmt1,PDK2,PEX11A,PSAP,PSMA1,RPL10,RPL12,Rpl34 (includes others),Rpl36,RPL5,RPL7,RPS12,RPS16,RPS18,RPS19,RPS20,RPS25,RPS26,RPS27L,RPS3,RPS5,SARDH,SCD,SCO2,SCPEP1,SERPINF1,SGPL1,SLC25A4,SPTBN1,SRSF3,STARD10,TALDO1,TANK,TKT,TMEM97,Tpm…	69 (6)	5		KRAS		TP53
calpeptin	chemical reagent		2		-0.819	5.17e-11	AKT1,Calcineurin protein(s),calpeptin,MAPK1,NFKBIA,TP53	ACSS2,AK2,ANPEP,ARSB,ASS1,ATP5S,CENPE,Ces1b/Ces1c,CKMT2,COL6A2,COPB1,CPOX,CPT1A,CTNNA2,CTSH,CTSZ,EEF1A1,FDXR,GLB1,GM2A,HDLBP,HRAS,KCNMA1,KRT17,KRT8,LYZ,OAT,Pcmt1,PDK2,PEX11A,PLD3,PLSCR1,PPT2,PSAP,PSMA1,RPL10,RPL12,RPL27A,Rpl34 (includes others),Rpl36,RPL5,RPL7,RPL8,RPS12,RPS16,RPS18,RPS19,RPS2,RPS20,RPS25,RPS26,RPS27L,RPS3,RPS5,RPSA,SCD,SCO2,SCPEP1,SERPINF1,SGPL1,SLC25A4,SPTBN1,SRSF3,SUOX,TALDO1,…	73 (6)	6				TP53	MAPK3,NFKBIA,PTK2
nitroaspirin	chemical drug		3		-0.311	5.17e-11	APEX1,BCL2,Calcineurin protein(s),CASP1,CASP3,CASP8,Cdc42,CDK2,Creb,EIF2AK2,ERBB2,ERK1/2,IGF1R,IL1,IL1B,IL33,KSR1,MAP3K1,MAPK8,NFKB1,nitroaspirin,P38 MAPK,PI3K (complex),PPARA,PPARG,PRKCD,PTGS1,PTGS2,STAT3,STK11,TP53	ABCD2,ACOT2,ACP6,ACSS2,ACY3,AK2,ATP5S,BCL2L1,BHMT,C8A,CENPE,CKMT2,COL6A2,COPB1,CPOX,CTSA,CTSZ,EEF1A1,EIF3A,EIF4E,ELOVL5,FABP2,FADS2,G6PD,GLB1,GUSB,HDLBP,HPD,HRAS,Ighg2b,ITGAV,KCNMA1,KRT1,Krt10,KRT18,KRT5,KRT72,MAN2B2,MGLL,Mup1 (includes others),MVP,NCL,OAT,PAICS,Pcmt1,PCYT1A,PDK2,PECR,PEX1,PLIN3,PLSCR1,PRG2,PSAP,PSMA1,RAB5A,RPL10,RPL12,RPL17,RPL23,Rpl34 (includes others),Rpl36,RPL5,RPL7,RPS10,RPS…	93 (31)	29					PTGS2
MAP3K21	kinase		3	Activated	3.621	5.28e-11	Akt,AR,BCL2,CEBPB,CHUK,CREB1,CSF1,EGFR,ESR1,FOS,FOXO3,GAB1,GATA4,HIF1A,HSF1,HTT,JUN,KAT5,KLF4,L1CAM,MAP2K1,MAP3K21,MAPK1,MTOR,NCOA1,NFE2L2,NFKB1,NFKBIA,NOTCH1,NR4A1,p70 S6k,POU5F1,PPARG,RAF1,RARA,RELA,RUNX1,SHC1,SP1,SREBF1,SREBF2,STAT3,TP53,TP73,TWIST1	AGPAT3,AK2,ANO10,ANPEP,AP3B1,ARSB,ASS1,ATP5S,BCL2L1,BCLAF1,BHMT,CELA1,CELSR3,Ces1b/Ces1c,CKMT2,CNP,COPA,COPB1,CPOX,CREG1,CTNNA2,CTSZ,DDB1,EEF1A1,EIF3A,EIF4E,FADS2,FARS2,FDXR,FHIT,FTL,GAA,GLB1,GM2A,GUSB,HDLBP,HIST2H2AC,HRAS,IDE,Ighg2b,IGKC,ISG15,ITGAV,KCNMA1,KIAA0391,KRT1,Krt10,KRT13,KRT17,MINOS1,MOGS,MVP,NCL,NUTF2,OS9,Pcmt1,PCYT1A,PDK2,PDXK,PEX1,PLD3,PLSCR1,PPT2,PRCP,PRELP,PRG2,PSAP,PSMA1,PSMD13,…	122 (45)	44
Jmy-p300	complex		3		-1.863	5.61e-11	AKT1,AR,CCND1,CDKN2A,CEBPA,CTNNB1,E2F1,EIF4E,EP300,ERBB2,ERK,ESR1,GLI1,IGF1R,IL6,Jmy-p300,JUNB,KLF1,MAP3K1,Mek,MSH2,MTOR,MYOD1,NANOG,NFE2L2,NFkB (complex),NOTCH1,P38 MAPK,PGR,PI3K (complex),RB1,SRF,TFAP2A,TP53,TSC2,XBP1	ACSS2,ACY3,AGPAT3,ANO10,AP3B1,ASS1,ATP5S,BCL2L1,CELA1,CENPE,Ces1b/Ces1c,CKMT2,CNP,COL6A2,COPA,COPB1,COPB2,CPOX,CPT1A,CTBS,CTSC,CTSH,CXADR,DGUOK,DNASE2,DPP7,EEF1A1,EIF3A,EIF5,FDXR,FTL,G6PC,GAA,GGH,GLA,GLB1,HDLBP,HNRNPK,HRAS,IDE,IGKC,Igkv1-117,ISG15,ITGAV,KCNMA1,Krt10,KRT18,KRT8,LYZ,MAN2B2,MINOS1,MRPL55,Mup1 (includes others),MVP,NEU1,OAT,OS9,PAICS,Pcmt1,PDK2,PECR,PPT2,PRELP,PRG2,PSAP,PSMA1,PSMD13,…	127 (36)	34				TP53
NCX-4040	chemical drug		3		1.212	5.79e-11	20s proteasome,Akt,AKT1,APEX1,BCL2,benzo(a)pyrene,CASP3,CASP9,CDK2,CYP,CYP1A1,CYP1A2,CYP1B1,ERK,IL18,MAP3K1,MAPK9,methimazole,MTOR,NCX-4040,NFkB (complex),NFKBIA,PSMB9,PTEN,PTGS2,REL,TCF7L2,TP53	ABCD2,ACOT4,ACSS2,ACY3,AK2,AKAP1,ASS1,ATP5S,BGN,Ces1b/Ces1c,CNP,COL6A2,COPB1,CPOX,CPT1A,CTSZ,DDB1,EEF1A1,EIF3A,EIF4E,ENPP4,FADS2,FDXR,FHIT,G6PC,G6PD,GLA,GLB1,GM2A,GYS2,HDLBP,Ighg2b,ISG15,ITGAV,KCNMA1,Krt10,KRT17,KRT18,KRT6B,KRT8,LYZ,MAN2B2,Mup1 (includes others),NCL,NEU1,OAT,Pcmt1,PCYT1A,PDK2,PEX11A,PLD3,PSAP,PSMA1,RPL10,RPL23,RPL27A,Rpl34 (includes others),Rpl36,RPL5,RPL7,RPL8,RPS12,RPS16,RPS18,…	98 (28)	21				NFKBIA,NQO1	CYP,CYP1A1
binimetinib	chemical drug		3	Activated	2.335	5.81e-11	AKT1,AMPK,Ap1,BCL2,binimetinib,CDK2,CDKN1B,CEBPB,CHUK,Creb,CREB1,CSF1,EIF4E,ERBB2,ERK,ERK1/2,ESR1,FOS,GAB1,GATA4,HIF1A,HSF1,IKBKB,JUN,KAT5,KLF4,MAP2K1,MAP2K2,MAPK1,MYOD1,NCOA1,NFE2L2,NFkB (complex),NFKB1,NR4A1,P38 MAPK,p70 S6k,PI3K (complex),POU5F1,PPARG,RAF1,RARA,SHC1,SP1,SREBF1,SREBF2,STAT3,STK11,TP53,TWIST1	ACP6,ACY3,AGPAT3,AK2,ANO10,ANPEP,AP3B1,ARSB,ATP5S,BCL2L1,BCLAF1,BHMT,CELA1,CELSR3,CKMT2,COPA,COPB1,CPOX,CREG1,CTNNA2,CTSZ,DDB1,DDX25,DGUOK,EEF1A1,EIF3A,FADS2,FARS2,FTL,GAA,GLA,GLB1,GM2A,GUSB,HDLBP,HIST2H2AC,HRAS,IDE,Ighg2b,IGKC,ISG15,ITGAV,KCNMA1,Krt10,KRT13,KRT17,KRT6B,MINOS1,MOGS,MVP,OAT,OS9,PAICS,Pcmt1,PCYT1A,PDK2,PDXK,PEX1,PLD3,PLIN3,PLSCR1,PPT2,PRCP,PRG2,PSAP,PSMA1,PSMD13,RAB5A,RACK1,RNASET2…	124 (50)	48
ARHGEF1/12	group		3		0.894	5.91e-11	Akt,ARHGEF1,ARHGEF1/12,ARHGEF12,BCAR1,Cdc42,CHUK,EGFR,ERK,ERK1/2,F2R,Focal adhesion kinase,GNA12,HRAS,IRS1,JUN,MAP3K1,MAPK14,MAPK8,MRTFA,NFKB1,P38 MAPK,PI3K (complex),PPARG,RELA,RHOA,SRF,STAT3,Tgf beta,TP53	ACSS2,ASS1,ATP5S,BCL2L1,BHMT,CENPE,Ces1b/Ces1c,CKMT2,COPB1,COPB2,CPOX,CTSA,CTSZ,EEF1A1,EIF4E,FABP2,FHIT,G6PC,G6PD,GLB1,GM2A,HDLBP,HRAS,Ighg2b,IGKC,Igkv1-117,KCNMA1,KRT72,KRT8,MAN2B2,MOGS,NCL,NLN,NUTF2,OAT,Pcmt1,PCYT1A,PDK2,PEX1,PEX11A,PLD3,PRG2,PSAP,PSMA1,RAB5A,RALA,RPL10,RPL12,RPL23,RPL27A,RPL30,Rpl34 (includes others),Rpl36,RPL5,RPL7,RPS10,RPS12,RPS16,RPS18,RPS19,RPS20,RPS25,RPS26,RPS27L,RPS5,R…	80 (30)	27
tempol	chemical drug		2		-0.333	6.03e-11	Akt,AMPK,ERK1/2,HSPB2,JUN,NFkB (complex),NFKBIA,P38 MAPK,PI3K (complex),RAC1,RAF1,STK11,tempol,TP53	ACP6,ACSS2,ATP5S,BCL2L1,BGN,BHMT,CENPE,Ces1b/Ces1c,CKMT2,COL6A2,COPB1,CPOX,CPT1A,CTSZ,EEF1A1,EIF3A,FDXR,G6PC,G6PD,GLA,GLB1,GM2A,HDLBP,HRAS,ISG15,KCNMA1,KIAA0391,KRT17,KRT18,KRT6B,LYZ,MGLL,MOGS,MVP,OAT,Pcmt1,PDK2,PLD3,PSAP,PSMA1,RAB5A,RPL10,RPL12,RPL23,RPL27A,Rpl34 (includes others),Rpl36,RPL5,RPL7,RPL8,RPS12,RPS16,RPS19,RPS2,RPS20,RPS25,RPS26,RPS27L,RPS3,RPS5,RPSA,SARDH,SCD,SCO2,SCPEP1,SGPL1,SLC2…	81 (14)	14				CAT,MAPK3	AMPK,MAP3K5,NFKBIA,PTGS2,RAC1,SPP1,TP53
ethoxyquin	chemical toxicant		3		1.132	6.26e-11	Akt,CHUK,cyclooxygenase,ERK1/2,ethoxyquin,Jnk,NFkB (complex),NFKBIA,NQO1,P38 MAPK,Pkc(s),PTGS1,PTGS2,tanespimycin,TP53	ACSS2,AK2,ARG1,ASS1,ATP5S,BCL2L1,BGN,BHMT,CENPE,Ces1b/Ces1c,CKMT2,COL6A2,COPB1,CPOX,CPT1A,CTSH,CTSZ,EEF1A1,FHIT,G6PC,GLA,GLB1,GM2A,HDLBP,HRAS,KCNMA1,Krt10,KRT17,KRT6B,LYZ,MVP,OAT,Pcmt1,PDK2,PLD3,PLSCR1,PSAP,PSMA1,RAB5A,RPL10,RPL12,RPL24,RPL27A,RPL30,Rpl34 (includes others),RPL35,Rpl36,RPL5,RPL7,RPL8,RPS12,RPS16,RPS18,RPS19,RPS2,RPS20,RPS25,RPS26,RPS27L,RPS3,RPS5,RPS8,RPSA,SCD,SCO2,SCPEP1,SGPL1,SL…	78 (15)	14				NQO1	cyclooxygenase
DMTF1	transcription regulator		2		0	6.37e-11	DMTF1,TP53	ACSS2,ANPEP,ATP5S,BCL2L1,CENPE,Ces1b/Ces1c,CKMT2,COL6A2,COPB1,CPOX,CPT1A,CTSH,EEF1A1,FDXR,G6PC,GLB1,HDLBP,HRAS,ISG15,ITGAV,KCNMA1,KRT18,KRT8,LYZ,MVP,OAT,Pcmt1,PDK2,PSAP,PSMA1,RPL10,RPL12,Rpl34 (includes others),Rpl36,RPL5,RPL7,RPS12,RPS16,RPS18,RPS19,RPS20,RPS25,RPS26,RPS27L,RPS3,RPS5,SCD,SCO2,SCPEP1,SGPL1,SLC25A4,SRSF3,TALDO1,TANK,TKT,TMEM97,Tpm1,TXN2,VIM,YBX1	60 (2)	2				CDKN1A,TP53
Atf	group		3		-1.59	6.86e-11	Akt,AR,Atf,ATF2,ATF3,ATF4,ATF5,ATF6,Creb,DDIT3,EPO,ERK,FOS,HIF1A,JUN,MCL1,MTOR,NFE2L2,RB1,STAT3,STAT5A,TP53,TP63	ACSS2,ACY3,AGPAT3,ARG1,ATP5S,BCL2L1,BHMT,CELA1,CENPE,Ces1b/Ces1c,CKMT2,CNP,COL6A2,COPB1,CPOX,CPT1A,CREG1,CTSH,EEF1A1,EIF3A,EIF4E,FARS2,FHIT,FTL,G6PC,G6PD,GARS,GLB1,GYS2,HDLBP,HIST2H2AC,IDE,KCNMA1,KRT5,KRT8,LYZ,MGLL,MOGS,MRPL55,MVP,Pcmt1,PDK2,PEX1,PLIN3,PRDX1,PSAP,PSMA1,PSMD13,RACK1,RPL10,RPL23,Rpl34 (includes others),Rpl36,RPL5,RPL7,RPL9,RPLP0,RPS12,RPS16,RPS19,RPS20,RPS24,RPS25,RPS26,RPS27L,RPS3…	89 (23)	21
ARAP3	other		3		0	7.51e-11	ARAP3,ARF6,BCAR1,Cdc42,CHUK,ERK,ERK1/2,Focal adhesion kinase,HRAS,IRS1,MAP3K1,MAPK1,MAPK12,MAPK14,MAPK8,MRTFA,NFkB (complex),NFKB1,P38 MAPK,PI3K (complex),PPARG,RAC1,RAF1,RELA,RHOA,SRF,STAT3,Tgf beta,TP53	ACSS2,ANPEP,ARG1,ARSB,ASS1,ATP5S,BCL2L1,BHMT,CENPE,Ces1b/Ces1c,CKMT2,COL6A2,COPB1,COPB2,CPOX,CTNNA2,CTSA,CTSZ,EEF1A1,FABP2,G6PC,G6PD,GLA,GLB1,GM2A,HDLBP,HRAS,Ighg2b,IGKC,Igkv1-117,ISG15,KCNMA1,KIAA0391,KRT6B,KRT72,KRT8,MAN2B2,NLN,OAT,Pcmt1,PCYT1A,PDK2,PEX1,PEX11A,PLD3,PPT2,PRDX1,PRG2,PSAP,PSMA1,RAB5A,RALA,RPL10,RPL12,RPL23,RPL27A,RPL30,Rpl34 (includes others),Rpl36,RPL5,RPL7,RPS10,RPS12,RPS16,RPS…	88 (29)	28
TTK	kinase		2		-0.258	7.53e-11	CDK2,TP53,TTK	ACSS2,ATP5S,BCL2L1,CENPE,Ces1b/Ces1c,CKMT2,COL6A2,COPB1,CPOX,CPT1A,CTSH,EEF1A1,FDXR,G6PC,GLB1,HDLBP,HRAS,ISG15,ITGAV,KCNMA1,KRT18,KRT8,LYZ,MVP,OAT,Pcmt1,PCYT1A,PDK2,PSAP,PSMA1,RPL10,RPL12,Rpl34 (includes others),Rpl36,RPL5,RPL7,RPS12,RPS16,RPS18,RPS19,RPS20,RPS25,RPS26,RPS27L,RPS3,RPS5,SCD,SCO2,SCPEP1,SGPL1,SLC25A4,SRSF3,TALDO1,TANK,TKT,TMEM97,Tpm1,TXN2,VIM,YBX1	60 (3)	2				BLM
cyclooxygenase	group		3		0.103	7.55e-11	Akt,Cdc42,Creb,cyclooxygenase,ERBB2,ERK,GNA12,IGF1R,MAPK1,MDM2,NFkB (complex),PI3K (complex),PPARA,PPARG,PTEN,PTGS1,PTGS2,PTK2,STK11,TBXA2R,TP53	ABCD2,ACOT2,ACP6,ACSS2,ACY3,AK2,AKAP1,ANPEP,ARG1,ARSB,ATP5S,BCL2L1,BGN,C8A,CENPE,CKMT2,COL6A2,COPB1,CPOX,CTNNA2,CTSA,CTSZ,EEF1A1,EIF3A,ELOVL5,FABP2,FADS2,FDXR,FHIT,GLA,GLB1,HDLBP,HPD,HRAS,ISG15,ITGAV,KCNMA1,KRT1,Krt10,KRT17,KRT18,KRT5,KRT6B,LYZ,MGLL,Mup1 (includes others),NEU1,OAT,PAICS,Pcmt1,PDK2,PECR,PLIN3,PLSCR1,PPT2,PSAP,PSMA1,RPL10,RPL12,RPL17,RPL23,Rpl34 (includes others),Rpl36,RPL5,RPL7,RP…	95 (21)	20	15-deoxy-delta-12,14 -PGJ 2	benzyloxycarbonyl-Leu-Leu-Leu aldehyde,ethoxyquin,tetrandrine		FOS
PSEN2	peptidase		2		-0.697	7.56e-11	AKT1,CTNNB1,EGFR,ERK1/2,Jnk,PLA2G6,PSEN2,TP53	ACSS2,ARG1,ASS1,ATP5S,BGN,BHMT,CENPE,CKMT2,COL6A2,COPB1,CPOX,CPT1A,CTSC,CTSH,CTSZ,EEF1A1,EIF4E,FDXR,G6PC,GLB1,HDLBP,HRAS,ISG15,ITGAV,KCNMA1,KIAA0391,KRT17,KRT18,KRT8,LYZ,Mup1 (includes others),MVP,NCL,NUTF2,OAT,Pcmt1,PDK2,PEX11A,PLSCR1,PSAP,PSMA1,RPL10,RPL12,Rpl34 (includes others),Rpl36,RPL5,RPL7,RPS12,RPS16,RPS18,RPS19,RPS20,RPS25,RPS26,RPS27L,RPS3,RPS5,SCD,SCO2,SCPEP1,SERPINF1,SGPL1,SKP2,SLC25…	74 (8)	8				Creb,PTGS2
HERC2	enzyme		2		-0.516	7.74e-11	BRCA1,HERC2,TP53	ACSS2,ATP5S,CENPE,Ces1b/Ces1c,CKMT2,COL6A2,COPB1,CPOX,CPT1A,CTSH,EEF1A1,FDXR,G6PC,GLB1,HDLBP,HRAS,ISG15,ITGAV,KCNMA1,KRT17,KRT18,KRT8,LYZ,MVP,OAT,Pcmt1,PDK2,PLSCR1,PSAP,PSMA1,RPL10,RPL12,Rpl34 (includes others),Rpl36,RPL5,RPL7,RPS12,RPS16,RPS18,RPS19,RPS20,RPS25,RPS26,RPS27L,RPS3,RPS5,SCD,SCO2,SCPEP1,SGPL1,SLC25A4,SRSF3,TALDO1,TANK,TKT,TMEM97,Tpm1,TXN2,VIM,YBX1	60 (3)	2				TP53,UBE3A
SRSF2	transcription regulator	-1.071	2		0	7.74e-11	SRSF2,TP53	ACSS2,ATP5S,BCL2L1,CENPE,Ces1b/Ces1c,CKMT2,COL6A2,COPB1,CPOX,CPT1A,CTSH,EEF1A1,FDXR,G6PC,GLB1,HDLBP,HRAS,ISG15,ITGAV,KCNMA1,KRT18,KRT8,LYZ,MVP,Nnt,OAT,Pcmt1,PDK2,PSAP,PSMA1,RPL10,RPL12,Rpl34 (includes others),Rpl36,RPL5,RPL7,RPS12,RPS16,RPS18,RPS19,RPS20,RPS25,RPS26,RPS27L,RPS3,RPS5,SCD,SCO2,SCPEP1,SGPL1,SLC25A4,SRSF3,TALDO1,TANK,TKT,TMEM97,Tpm1,TXN2,VIM,YBX1	60 (2)	2	CLK1,CSNK2A1,DDIT3,MYC	5-fluorouracil,imatinib,tanespimycin		CCND1,MST1R	CDH1,TP53
1-palmityl-2-acetylglycerol, (S)-isomer	chemical - kinase inhibitor		3		-0.953	7.91e-11	1-palmityl-2-acetylglycerol, (S)-isomer,26s Proteasome,ADRB2,AKT1,Ap1,BCL2,CDK2,CHUK,CLOCK,Creb,CREB1,DDX58,EGFR,EIF4E,ELAVL1,ERK1/2,HMGA1,HSF1,IKBKB,INSR,JUN,KAT2B,KRAS,MAP2K1,MAPK1,NFkB (complex),NFKBIA,OGG1,P38 MAPK,PI3K (complex),PPARA,PRKCA,PRKCB,PRKCG,RAC1,RAF1,RARA,RAS,RB1,SHC1,SPI1,STAT3,TFEB,THOC5,TP53,TP73,VEGFA	ABCD2,ACY3,AK2,ANO10,ANPEP,ARSA,ATP5S,BCL2L1,BCLAF1,BHMT,C8A,CKMT2,COPB1,COX20,CPOX,CTNNA2,CTSA,CTSC,CTSZ,CXADR,DGUOK,EEF1A1,EIF4E,EIF5,ELOVL5,FADS2,FDXR,FTL,GAA,GALNS,GLA,GM2A,GUSB,GYS2,HDLBP,HPD,IDE,Ighg2b,KCNMA1,KIAA0391,KRT1,KRT6B,MGLL,MOGS,MRPL55,MTRR,Mup1 (includes others),NCL,NEU1,NUTF2,OAT,Pcmt1,PCYT1A,PDK2,PDXK,PECR,PEX1,PEX11A,PLD3,PLIN3,PPT2,PRCP,PRDX1,PRG2,PSAP,PSMA1,RAB5A,RPL10,RPL12…	110 (47)	45
SEMA4D	transmembrane receptor		3		-0.093	8.11e-11	AHR,AKT1,Alp,AR,Cdc42,CDH1,CDK2,CHUK,Creb,CSF2RB,CTNNB1,EGFR,ERBB2,ERK1/2,ESR1,FOXO1,GAB1,HIF1A,HRAS,JUN,L-tyrosine,MAP3K1,MAPK1,MAPK12,MAPK14,MED1,MET,MRTFA,MST1R,MYD88,NFKB1,NFKBIA,NOTCH1,P38 MAPK,PLXNB1,PRL,RAS,RB1,RHOA,SEMA4D,SHC1,SP1,SRF,STAT3,SYK/ZAP,tamoxifen,TERT,Tgf beta,TP53,TSC2	ACP6,ACY3,AK2,ANO10,ANPEP,AP3B1,ARG1,ARSB,ASS1,ATP5S,BCL2L1,BCLAF1,BHMT,CDK5RAP3,CENPE,Ces1b/Ces1c,COL6A2,COPA,COPB1,COPB2,CPOX,CREG1,CTNNA2,CTSC,CTSZ,CXADR,DDB1,DPP7,Ear2 (includes others),FADS2,FMO3,FTL,GAA,GLB1,GM2A,HDLBP,HIST2H2AC,HRAS,IDE,Ighg2b,IGKC,Krt10,KRT13,KRT5,KRT72,MAN2B2,MAVS,MINOS1,MOGS,MRPL45,MRPL47,MRPL55,Mup1 (includes others),NCL,NEU1,NLN,NUTF2,OS9,PAICS,Pcmt1,PCYT1A,PDK2,PEX1,…	115 (50)	45	ciprofloxacin	epigallocatechin-gallate		GAB1,MST1R
NQO1	enzyme		2		1.254	8.31e-11	Akt,CHUK,ERK1/2,Jnk,NFkB (complex),NFKBIA,NQO1,P38 MAPK,Pkc(s),tanespimycin,TP53	ACSS2,AK2,ASS1,ATP5S,BCL2L1,BGN,BHMT,CENPE,Ces1b/Ces1c,CKMT2,COL6A2,COPB1,CPOX,CPT1A,CTSH,CTSZ,EEF1A1,FHIT,G6PC,GLA,GLB1,GM2A,HDLBP,HRAS,KCNMA1,KRT17,KRT6B,LYZ,MVP,OAT,Pcmt1,PDK2,PLD3,PLSCR1,PSAP,PSMA1,RAB5A,RPL10,RPL12,RPL24,RPL27A,RPL30,Rpl34 (includes others),RPL35,Rpl36,RPL5,RPL7,RPL8,RPS12,RPS16,RPS18,RPS19,RPS2,RPS20,RPS25,RPS26,RPS27L,RPS3,RPS5,RPS8,RPSA,SCD,SCO2,SCPEP1,SGPL1,SLC25A4,SPTBN…	77 (11)	11	1,2-dithiol-3-thione,15-deoxy-delta-12,14 -PGJ 2,3-methylcholanthrene,arsenic,benzyloxycarbonyl-Leu-Leu-Leu aldehyde,brivudine,bromobenzene,butylated hydroxyanisol,coumarin,CYP,CYP1A1,ethoxyquin,gemfibrozil,KRAS,MAFF,MYC,NCX-4040,NFE2L2,nitrofurantoin,sulindac sulfide,xanthohumol	colcemid,FOS,methotrexate,ochratoxin A,pirinixic acid,PML,S-nitrosoglutathione		CCND1,CDKN1A,glycogen,NFKBIA,PTGS2,tanespimycin,TP53	Aldose Reductase
bryostatin 1	chemical drug		2		0.329	8.35e-11	AKT1,BCL2,bryostatin 1,CDK2,CREB1,ERK1/2,KRAS,MAPK1,Pkc(s),TP53	ACSS2,ARG1,ARSB,ASS1,ATP5S,BGN,BHMT,CENPE,Ces1b/Ces1c,CKMT2,COL6A2,COPB1,CPOX,CPT1A,CTNNA2,CXADR,EIF5,FDXR,G6PD,GAA,GLA,GLB1,HDLBP,HRAS,Ighg2b,ITGAV,KCNMA1,KRT17,KRT18,KRT8,LYZ,MTRR,MVP,OAT,Pcmt1,PCYT1A,PDK2,PDXK,PEX11A,PPT2,PRCP,PSAP,PSMA1,RPL10,RPL12,Rpl34 (includes others),Rpl36,RPL5,RPL7,RPS12,RPS16,RPS18,RPS19,RPS20,RPS25,RPS26,RPS27L,RPS3,RPS5,RPS6,RPSA,SCD,SCO2,SCPEP1,SERPINF1,SGPL1,SLC25A…	83 (10)	10				TP53	KRAS,MYC
phenacetin	chemical drug		3		-0.311	8.43e-11	Akt,AKT1,Cdc42,Creb,ERBB2,IGF1R,MDM2,NFkB (complex),phenacetin,PI3K (complex),PPARA,PPARG,PTEN,PTGS1,PTGS2,STK11,TP53	ABCD2,ACOT2,ACP6,ACSS2,ACY3,AK2,AKAP1,ATP5S,BCL2L1,C8A,CENPE,Ces1b/Ces1c,CKMT2,COL6A2,COPB1,CPOX,CTSA,CTSZ,EEF1A1,EIF3A,ELOVL5,FABP2,FADS2,FDXR,FHIT,G6PD,GLA,GLB1,HDLBP,HPD,HRAS,ISG15,ITGAV,KCNMA1,KRT1,Krt10,KRT17,KRT18,KRT5,KRT6B,LYZ,MGLL,Mup1 (includes others),MVP,NEU1,OAT,PAICS,Pcmt1,PDK2,PECR,PEX11A,PLIN3,PSAP,PSMA1,RPL10,RPL12,RPL17,RPL23,Rpl34 (includes others),Rpl36,RPL5,RPL7,RPS10,RPS12,R…	93 (17)	17				LGALS3,MYC,SPP1	PTGS2
8-bromoguanosine 3',5'-cyclic monophosphate	chemical - kinase inhibitor		2		-1.823	8.54e-11	8-bromoguanosine 3',5'-cyclic monophosphate,Akt,AKT1,Creb,CREB1,ERK,ERK1/2,FOXO1,MAPK1,MAPK14,P38 MAPK,RAC1,RAF1,TP53	ACSS2,ACY3,ANPEP,ARG1,ARSB,ASS1,ATP5S,BGN,BHMT,CDK5RAP3,CENPE,COL6A2,COPB1,CPOX,CTNNA2,CTSH,EEF1A1,FDXR,FHIT,GAA,GLA,GLB1,HDLBP,HRAS,KCNMA1,KIAA0391,KRT1,KRT17,KRT6B,KRT8,LYZ,MAVS,MGLL,MRPL45,MRPL47,MRPL55,MVP,OAT,Pcmt1,PDK2,PDXK,PEX11A,PLIN3,PLSCR1,PPT2,PRCP,PRDX1,PSAP,PSMA1,RAB5A,RPL10,RPL12,Rpl34 (includes others),Rpl36,RPL5,RPL7,RPS12,RPS16,RPS18,RPS19,RPS2,RPS20,RPS25,RPS26,RPS27L,RPS3,RPS5,…	87 (14)	13				CDKN1A,Creb,FOS,HINT1,MAPK3,PPP1R1B,RAC1	PLAUR
D-glucose	chemical - endogenous mammalian		2		0.451	8.68e-11	26s Proteasome,AHR,AKT1,AMPK,Calcineurin protein(s),Cdc42,CDK2,CDK5,CEBPA,CREB1,CTNNB1,D-glucose,EGFR,EIF4E,ERK,ERK1/2,ERN1,FOS,FOXO1,HIF1A,JAK2,JUN,MAP2K1,MAPK1,MAPK11,MAPK14,MTOR,Nfat (family),NFkB (complex),NFKBIA,OGA,P38 MAPK,PDX1,PI3K (complex),PRKAA,PRKAA2,PTEN,PTGS2,RAF1,RB1,SHC1,SIRT1,SLC29A1,SP1,STAT5A,STAT5B,STK11,Tgf beta,THRB,TP53,TSC2	ABCD2,ACP6,AKAP1,ARSB,ASS1,ATP5S,BCL2L1,BCLAF1,BHMT,CDK5RAP3,CENPE,Ces1b/Ces1c,CKMT2,COL6A2,COPB1,CPOX,CREG1,CTNNA2,CTSZ,DGUOK,DPP7,EIF4E,ERMP1,FABP2,FARS2,FMO3,FTL,G6PC,GAA,GGH,GLA,GM2A,GUSB,GYS2,HDLBP,HIST2H2AC,HNRNPK,Ighg2a,Ighg2b,KCNMA1,KIAA0391,Krt10,KRT5,KRT72,MAVS,MOGS,MRPL45,MRPL47,MRPL55,Mup1 (includes others),NCL,NEU1,NUS1,NUTF2,OAT,Pcmt1,PCYT1A,PDXK,PECR,PLD3,PLIN3,PPT2,PRCP,PRDX1,PREL…	123 (51)	51	carbohydrate,CXCL14,DL-fructose,GPR68,GRB14,LRP6,N-nitro-L-arginine methyl ester,NRIP1,PIK3R2,RAPGEF3,sirolimus,SLC13A5,SREBF2,Srebp,tetracaine,VHL	3-(methylthio)propionic acid,7alpha-hydroxycholesterol,amino acids,BSCL2,C1QL3,ciprofibrate,ELOVL5,epigallocatechin-gallate,FGF19,genistein,leucine,LGALS3,Mup1 (includes others),OBP2B,pirinixic acid,PRLR,PYY,S-equol,thiazolidinedione,TO-901317,troglitazone		ACLY,ACOX1,AGT,Aldose Reductase,CCND1,Cdc42,CDK5,CDKN1A,creatine kinase,DDIT3,FASN,FOS,GAB1,GPI,MAPK11,MAPK3,NFKBIA,palmitic acid,PAX4,PIK3CB,PLAUR,PTGS2,PTK2,RAC1,SERPINB2,SVIL	CAT,Creb,GFPT1,MAP3K5,NFE2L2,PBK,SIRT7,SLC29A1,TSC2,XBP1
(diaminocyclohexane)(diacetato)(dichloro)platinum	chemical reagent		2		0	8.89e-11	(diaminocyclohexane)(diacetato)(dichloro)platinum,CDK2,TP53	ACSS2,ATP5S,BCL2L1,CENPE,Ces1b/Ces1c,CKMT2,COL6A2,COPB1,CPOX,CPT1A,CTSH,EEF1A1,FDXR,G6PC,GLB1,HDLBP,HRAS,ISG15,ITGAV,KCNMA1,KRT18,KRT8,LYZ,MVP,OAT,Pcmt1,PCYT1A,PDK2,PSAP,PSMA1,RPL10,RPL12,Rpl34 (includes others),Rpl36,RPL5,RPL7,RPS12,RPS16,RPS18,RPS19,RPS20,RPS25,RPS26,RPS27L,RPS3,RPS5,SCD,SCO2,SCPEP1,SGPL1,SLC25A4,SRSF3,TALDO1,TANK,TKT,TMEM97,Tpm1,TXN2,VIM,YBX1	60 (3)	2				CDKN1A,TP53
UBE3A	enzyme		2		0.768	9.09e-11	Akt,ESR1,HTT,PGR,RAC1,SOX9,TERT,TP53,UBE3A	ACSS2,ANO10,AP3B1,ASS1,ATP5S,BCL2L1,BCLAF1,Ces1b/Ces1c,CKMT2,COPA,COPB1,CPOX,CPT1A,CTBS,CTSC,CTSH,CXADR,EEF1A1,FDXR,FHIT,G6PC,G6PD,GLB1,HDLBP,HRAS,ISG15,ITGAV,KCNMA1,Krt10,KRT6B,KRT8,LYZ,MINOS1,Mup1 (includes others),MVP,OAT,OS9,Pcmt1,PDK2,PRELP,PSAP,PSMA1,RPL10,RPL12,Rpl34 (includes others),Rpl36,RPL5,RPL7,RPS12,RPS16,RPS18,RPS19,RPS20,RPS25,RPS26,RPS27L,RPS3,RPS5,SCD,SCO2,SCPEP1,SEC63,SERPINF1,…	83 (9)	8	benzyloxycarbonyl-Leu-Leu-Leu aldehyde,HERC2	NFKBIA			CDKN1A,PML,RAC1,RNF2,TP53
MSH2	enzyme		2		-0.516	9.14e-11	MSH2,TP53	ACSS2,ATP5S,CENPE,Ces1b/Ces1c,CKMT2,COL6A2,COPB1,CPOX,CPT1A,CTSH,EEF1A1,FDXR,G6PC,GLB1,HDLBP,HRAS,Ighg2b,IGKC,ISG15,ITGAV,KCNMA1,KRT18,KRT8,LYZ,MVP,OAT,Pcmt1,PDK2,PSAP,PSMA1,RPL10,RPL12,Rpl34 (includes others),Rpl36,RPL5,RPL7,RPS12,RPS16,RPS18,RPS19,RPS20,RPS25,RPS26,RPS27L,RPS3,RPS5,SCD,SCO2,SCPEP1,SGPL1,SLC25A4,SRSF3,TALDO1,TANK,TKT,TMEM97,Tpm1,TXN2,VIM,YBX1	60 (2)	2	MAP3K5,MYC			CCND1
MTBP	other		2		-0.258	9.14e-11	MDM2,MTBP,TP53	ACSS2,ATP5S,BCL2L1,CENPE,Ces1b/Ces1c,CKMT2,COL6A2,COPB1,CPOX,CPT1A,CTSH,EEF1A1,FDXR,G6PC,GLB1,HDLBP,HRAS,ISG15,ITGAV,KCNMA1,KRT18,KRT8,LYZ,MVP,NCL,OAT,Pcmt1,PDK2,PSAP,PSMA1,RPL10,RPL12,Rpl34 (includes others),Rpl36,RPL5,RPL7,RPS12,RPS16,RPS18,RPS19,RPS20,RPS25,RPS26,RPS27L,RPS3,RPS5,SCD,SCO2,SCPEP1,SGPL1,SLC25A4,SRSF3,TALDO1,TANK,TKT,TMEM97,Tpm1,TXN2,VIM,YBX1	60 (3)	3	MYC			TP53
dyphylline	chemical drug		3		0.318	9.26e-11	ADORA1,ADORA2A,ADORA2B,ADORA3,ADRB2,Akt,APEX1,BDNF,CREB1,dyphylline,EGFR,ERK,MAPK1,MAPK11,MAPK12,MAPK14,NFkB (complex),NFKBIA,Pde,PDE3A,PDE4B,PDE4D,PDE8A,PPP1R1B,PTEN,RAF1,SCAP,SREBF2,TP53	AK2,AKAP1,ANPEP,ARG1,ARSB,ATP5S,CENPE,Ces1b/Ces1c,CKMT2,COL6A2,COPB1,CPOX,CTNNA2,CTSH,CTSZ,EEF1A1,EIF4E,FADS2,FHIT,FTL,G6PD,GAA,GLB1,GM2A,HDLBP,HNRNPK,HRAS,IDE,KCNMA1,KRT18,KRT6B,LYZ,MGLL,NCL,NEU1,NUTF2,Pcmt1,PCYT1A,PDK2,PDXK,PLD3,PPT2,PRCP,PRDX1,PSAP,PSMA1,RPL10,RPL12,RPL13,Rpl23a,RPL27A,Rpl34 (includes others),RPL35A,Rpl36,RPL37A,RPL5,RPL7,RPL8,RPS12,RPS16,RPS19,RPS20,RPS23,RPS25,RPS26,RPS27L,R…	89 (29)	21					ADORA1
ADORA1	G-protein coupled receptor		3		-0.385	9.4e-11	ADORA1,ADORA2A,ADORA2B,AKT1,Ap1,BDNF,CASP1,Cdc42,CTNNB1,DRD1,DUSP1,EGFR,EGR1,EPB41,ERBB2,FOS,FOXO1,FOXO3,GNAI1,HIF1A,HRAS,IL1,IL18,IL1B,IL33,ITCH,JAK2,JUN,KRAS,MAP2K3,MAP2K4,MAP2K6,MAPK14,NFkB (complex),NFKB1,NFKBIA,PGR,PLC,PLCB3,PTEN,RAC1,RAS,SHC1,SP1,STAT3,STAT5B,STAT6,TP53,TRPM8	AK2,AKAP1,ARG1,ARL1,ATP5S,BCL2L1,CDK5RAP3,CENPE,Ces1b/Ces1c,CKMT2,COL6A2,COPB1,COPB2,CPOX,CTBS,CTSA,CTSZ,CXADR,EIF4E,EIF5,FARS2,FTL,G6PC,GLB1,GM2A,GPX4,GUSB,HDLBP,HIST2H2AC,HNRNPK,Ighg2b,IGKC,KCNMA1,KIAA0391,KRT17,KRT6B,KRT72,MAVS,MGLL,MOGS,MRPL45,MRPL47,MRPL55,MTRR,Mup1 (includes others),NCL,NEU1,NLN,NUTF2,PAICS,Pcmt1,PCYT1A,PDK2,PEX1,PLD3,PRDX1,PRG2,PSAP,PSMA1,RPL10,RPL12,RPL13,RPL17,Rpl23a,RPL…	108 (49)	45		ADA,clofarabine,dyphylline		arachidonic acid
Ins1	other		2		-0.378	9.96e-11	ACLY,Akt,AKT1,AKT3,AMPK,BCAR1,BCL2,CAV1,CCND1,CEBPA,CREB1,ERK,ERK1/2,ESR1,FASN,FOXO1,FOXO3,GAB1,GCK,HRAS,IGF1R,Ins1,INSR,JAK2,KRAS,LIPE,MAP2K1,MAPK1,Mek,MTOR,NFkB (complex),NFKBIA,P38 MAPK,p70 S6k,PI3K (complex),PPARA,PRL,PTK2,RAF1,RAS,RB1,SHC1,SREBF1,STAT3,STAT5A,STAT5B,STK11	ABCD2,ACOT2,ACP6,ACSS2,AK2,ANO10,ANPEP,AP3B1,ARSB,ATP5S,BCLAF1,C8A,CDK5RAP3,CENPE,Ces1b/Ces1c,CKMT2,CNP,COPA,CREG1,CTNNA2,CTSA,CTSC,CTSZ,EEF1A1,EIF3A,EIF4E,ELOVL5,FADS2,FDXR,FHIT,FTL,G6PC,G6PD,GAA,GGH,GLA,GLB1,GM2A,GUSB,GYS2,HNRNPK,HPD,HRAS,IDE,Ighg2b,IGKC,KCNMA1,KIAA0391,KRT1,Krt10,KRT72,LYZ,MAVS,MGLL,MINOS1,MRPL45,MRPL47,MRPL55,MTRR,Mup1 (includes others),NLN,OS9,PDK2,PDXK,PECR,PEX1,PEX11A,PLD3…	112 (47)	47	CDK5,CXCL14,genistein,GIP,GPR68,HSPA5,KCNA3,linolenic acid,oleic acid,RAPGEF3,SLC13A5,SPP1,TRH	BSCL2,ciprofibrate,DNAJC3,MLXIPL,palmitic acid,SREBF2,troglitazone,WRN		CAT,CCND1,DDIT3,EPO,FASN,FOS,GAB1,glycogen,GRB14,HRAS,IGF1R,Insulin,KRAS,LRP6,MAPK11,MAPK3,NFKBIA,Pde3,PFKFB1,RAS,RASA1,RPS6KA2,RPS6KB2,Sos	ACLY,AGT,AMPK,CDKN1A,CYP1A1,EHHADH,HSD17B4,PRKAA1,PTK2
FGF3	growth factor		2		-0.361	1e-10	FGF3,Fgfr,FGFR1,MAPK1,RAF1,RAS,TP53	ACSS2,ANPEP,ARSB,ATP5S,BCL2L1,CENPE,Ces1b/Ces1c,CKMT2,COL6A2,COPB1,CPOX,CPT1A,CTNNA2,DDX25,EIF4E,FDXR,G6PC,GLB1,HDLBP,HRAS,ISG15,KCNMA1,KIAA0391,KRT17,KRT18,KRT8,LYZ,MGLL,OAT,Pcmt1,PDK2,PLSCR1,PPT2,PRDX1,PSAP,PSMA1,RPL10,RPL12,Rpl34 (includes others),Rpl36,RPL5,RPL7,RPS12,RPS16,RPS18,RPS19,RPS2,RPS20,RPS25,RPS26,RPS27L,RPS3,RPS5,RPS6,SCD,SCO2,SCPEP1,SGPL1,SLC25A4,SNRPD1,SRSF3,SUOX,TALDO1,TANK,TKT…	69 (7)	6				CDH1,FGFR1,MAPK3,RAS	TP53
NFKBIB	transcription regulator		3		0.981	1.02e-10	26s Proteasome,ADRB2,Akt,AKT1,APEX1,BAX,BCL2,Calcineurin protein(s),CASP3,CASP9,CDK2,CDKN2A,CEBPB,CFTR,Creb,CREB1,CREM,DDIT3,EGFR,ERK,ERN1,ETV5,FOS,FOXO1,FOXO3,GLI1,HSF1,HSPA5,HTT,IKBKB,IL18,JUN,LIPE,MAP3K1,MCL1,Mek,MTOR,NFKB1,NFKBIA,NFKBIB,P38 MAPK,PARP,PDE8A,PNPLA2,PPARA,PPP1R1B,PRKACA,PSEN1,PTEN,SCAP,SREBF2,STAT3,STK11,TGM2,TP73,WT1	ABCD2,ACOT2,ACP6,ACY3,AK2,AKAP1,ANPEP,ASS1,BCL2L1,BGN,C8A,CDK5RAP3,CENPE,Ces1b/Ces1c,CKMT2,CNP,CPT1A,CTNNA2,CTSA,CTSC,CTSH,CTSZ,Cyp2c40 (includes others),EEF1A1,EIF3A,EIF4E,ELOVL5,FABP2,FARS2,FDXR,FHIT,FTL,G6PC,GAA,GLB1,GM2A,HDLBP,HPD,IDE,Ighg2b,IGKC,ISG15,KIAA0391,KRT18,KRT8,LYZ,MAN2B2,MAVS,MOGS,MRPL45,MRPL47,NCL,NEU1,NLN,NUTF2,OS9,PCYT1A,PDXK,PEX1,PLD3,PLIN3,PPT2,PRCP,PRELP,PRG2,PSAP,RAB5A,RPL1…	104 (56)	53	15-deoxy-delta-12,14 -PGJ 2,KRAS,PTPN2			IGF1R	PRKACA
CDC14B	phosphatase		3		1.811	1.04e-10	AKT1,AR,CCND1,CDC14B,CDH1,CDK1,CDKN1B,CDKN2A,CEBPA,CTNNB1,E2F1,EIF4E,ERBB2,ERK,ERK1/2,EZH2,FMR1,FOS,FZR1,HIF1A,HMGA1,HNF4A,IGF1R,IL6,ING1,IREB2,Jnk,JUNB,MAPK9,MCL1,Mek,MSH2,MTOR,MYOD1,NANOG,NOTCH1,P38 MAPK,PGR,PI3K (complex),PPARG,SIRT2,STAT3,TP53,TSC2	ACSS2,ACY3,ANPEP,ASS1,ATP5S,BCL2L1,BHMT,CENPE,Ces1b/Ces1c,CKMT2,CNP,COL6A2,COPB1,CPOX,CPT1A,CTBS,CTSC,CTSH,CTSZ,DDB1,DDX25,DGUOK,DPP7,EEF1A1,EIF3A,EIF4E,EIF5,FARS2,FDXR,FMO3,FTL,FUCA1,G6PC,GAA,GGH,GLA,GLB1,HDLBP,HIST2H2AC,HNRNPK,HPD,HRAS,IGKC,ISG15,ITGAV,KCNMA1,KRT13,KRT17,KRT18,KRT8,LYZ,MGLL,Mup1 (includes others),MVP,NEU1,OAT,PAICS,Pcmt1,PDK2,PECR,PEX1,PLSCR1,PRELP,PRG2,PSAP,PSMA1,RAB5A,RALA,RP…	122 (44)	40					TP53
S-equol	chemical drug		2		-0.442	1.04e-10	Akt,ESR1,ESR2,KAT5,S-equol,TP53	ACSS2,ANO10,ANPEP,AP3B1,ASS1,ATP5S,BCL2L1,BCLAF1,Ces1b/Ces1c,CKMT2,COL6A2,COPA,COPB1,CPOX,CTSC,CTSH,CXADR,DDB1,EEF1A1,FDXR,FHIT,G6PC,G6PD,GLB1,GM2A,HDLBP,HRAS,ISG15,ITGAV,KCNMA1,Krt10,KRT17,KRT18,KRT6B,KRT8,LYZ,MINOS1,MVP,OAT,OS9,Pcmt1,PDK2,PSAP,PSMA1,RPL10,RPL12,Rpl34 (includes others),Rpl36,RPL5,RPL7,RPS12,RPS16,RPS18,RPS19,RPS20,RPS25,RPS26,RPS27L,RPS3,RPS5,SCD,SCO2,SCPEP1,SEC63,SGPL1,SLC25A4,…	82 (6)	5				TP53	D-glucose
clofarabine	chemical drug		3		1.251	1.05e-10	ADORA1,ADORA2A,ADORA3,BDNF,clofarabine,Creb,CREB1,EGFR,ERK1/2,GNAI1,MAPK1,MAPK11,MAPK12,MAPK14,NFkB (complex),NFKBIA,P38 MAPK,PPP1R1B,Raf,RRM1,RRM2B,STAT1,TP53	ACSS2,ACY3,AK2,ANPEP,ARSB,ASS1,ATP5S,BGN,BHMT,CENPE,Ces1b/Ces1c,CKMT2,COL6A2,COPB1,CPOX,CTNNA2,CTSH,CTSZ,EEF1A1,EIF4E,FTL,G6PC,GAA,GLB1,GM2A,HDLBP,HNRNPK,HRAS,ISG15,KCNMA1,KIAA0391,KRT1,KRT18,KRT6B,LYZ,NCL,NUTF2,OAT,Pcmt1,PDK2,PDXK,PLD3,PLIN3,PPT2,PRCP,PRDX1,PSAP,PSMA1,RAB5A,RPL10,RPL12,RPL13,Rpl23a,RPL27A,Rpl34 (includes others),RPL35A,Rpl36,RPL37A,RPL5,RPL7,RPL8,RPS12,RPS16,RPS19,RPS2,RPS20,RPS…	92 (23)	18					ADORA1
HOXA1	transcription regulator		3		-0.202	1.05e-10	AKT1,EGFR,ESR1,ESR2,estrogen receptor,HNF4A,HOXA1,PI3K (complex),PPARA,PPARG,PRL,RELA,STAT4,STAT5A,STAT5B,TP53	ABCD2,ACOT2,ACP6,ANO10,ANPEP,AP3B1,ATP5S,BCL2L1,BCLAF1,C8A,CENPE,CKMT2,COL6A2,COPA,COPB1,CPOX,CTSA,CTSC,CTSZ,CXADR,EEF1A1,EIF4E,ELOVL5,FABP2,FADS2,FDXR,FHIT,FMO3,G6PC,GM2A,GYS2,HDLBP,HPD,HRAS,IDE,ITGAV,KIAA0391,Krt10,KRT5,KRT72,LYZ,MGLL,MINOS1,Mup1 (includes others),MVP,NCL,NUTF2,OAT,OS9,Pcmt1,PLSCR1,PSAP,PSMA1,RPL10,RPL12,RPL23,Rpl34 (includes others),Rpl36,RPL5,RPL7,RPLP0,RPS12,RPS16,RPS18,RPS1…	98 (16)	15	CDH1,RAC1
PTGS2	enzyme		2		0.209	1.07e-10	Akt,AKT1,Cdc42,Creb,ERBB2,IGF1R,MDM2,NFkB (complex),PI3K (complex),PPARA,PPARG,PTEN,PTGS2,STK11,TP53	ABCD2,ACOT2,ACP6,ACSS2,ACY3,AK2,AKAP1,ATP5S,BCL2L1,C8A,CENPE,Ces1b/Ces1c,CKMT2,COL6A2,COPB1,CPOX,CTSA,CTSZ,EEF1A1,EIF3A,ELOVL5,FABP2,FADS2,FDXR,FHIT,G6PD,GLA,GLB1,HDLBP,HPD,HRAS,ISG15,ITGAV,KCNMA1,KRT1,Krt10,KRT17,KRT18,KRT5,KRT6B,LYZ,MGLL,Mup1 (includes others),MVP,NEU1,OAT,PAICS,Pcmt1,PDK2,PECR,PEX11A,PLIN3,PSAP,PSMA1,RPL10,RPL12,RPL17,RPL23,Rpl34 (includes others),Rpl36,RPL5,RPL7,RPS10,RPS12,R…	92 (15)	15	2-deoxyglucose,3-methylcholanthrene,5-fluorouracil,acadesine,ADIPOQ,AGT,AMPK,arachidonic acid,ARHGDIB,arsenite,cadmium,carrageenan,D-glucose,ELAVL1,EPHB1,epigallocatechin-gallate,FGFR1,GPR68,HRAS,KRAS,MAPK11,MAPK3,mir-144,mir-451,MYC,N-nitro-L-arginine methyl ester,NFKBIA,NQO1,palmitic acid,pirinixic acid,PLCE1,PROK1,PSEN2,RAS,RICTOR,S-nitrosoglutathione,SPP1,sulindac sulfide,sulprostone,Tween 20…	4-coumaric acid,8-oxo-7-hydrodeoxyguanosine,ALOX5,amiloride,ARN2508,bardoxolone methyl,benzyl isothiocyanate,benzyloxycarbonyl-Leu-Leu-Leu aldehyde,carvacrol,CAT,CFTR,COL4A3,docosahexaenoic acid,EPO,FASN,genistein,harmine,HSD17B4,irbesartan,miR-542-3p (miRNAs w/seed GUGACAG),NCOR1,NFE2L2,niflumic acid,nitroaspirin,oleic acid,phenacetin,selenium,tempol,tenoxicam,TO-901317,TRAP1,troglitazone,valdec…		CCND1,Cdc42,CDKN1A,Ldh (complex),PRKAA,PRKACA,SNAI1	CDH1,Inflammasome (Nalp3, Asc, Casp1)
isoflurophate	chemical drug		3		1.334	1.1e-10	Cdc42,CHUK,CTNNB1,EIF2S1,ERK,ERK1/2,FAP,FOS,HGF,HRAS,isoflurophate,JAK2,JUN,KLKB1,LCAT,LRP1,MAP3K1,MAPK1,MAPK12,MAPK14,MRTFA,MTOR,NFkB (complex),NFKB1,P38 MAPK,PLAT,PLG,PPARG,PRKAA,RAF1,RELA,RHOA,SRF,STAT3,Tgf beta,TP53	ACSS2,ANPEP,ARSB,ASS1,ATP5S,BCL2L1,BHMT,CENPE,Ces1b/Ces1c,CHIA,CKMT2,CNP,COL6A2,COPB1,COPB2,CPOX,CTNNA2,CTSA,CTSZ,CYP2S1,EIF3A,FABP2,FARS2,GLA,GLB1,GM2A,HDLBP,HRAS,IDE,Ighg2b,IGKC,Igkv1-117,KCNMA1,KIAA0391,KRT6B,KRT72,MAN2B2,MOGS,Mup1 (includes others),MVP,NLN,Pcmt1,PCYT1A,PDK2,PEX1,PEX11A,PLD3,PPT2,PRDX1,PRG2,PSAP,PSMA1,RAB5A,RPL10,RPL12,RPL27A,RPL30,Rpl34 (includes others),Rpl36,RPL5,RPL7,RPL9,…	95 (36)	32
MDC1	other		2		0.516	1.11e-10	BRCA1,MDC1,TP53	ACSS2,ATP5S,CENPE,Ces1b/Ces1c,CKMT2,COL6A2,COPB1,CPOX,CPT1A,CTSH,EEF1A1,FDXR,G6PC,GLB1,HDLBP,HRAS,ISG15,ITGAV,KCNMA1,KRT17,KRT18,KRT8,LYZ,MVP,OAT,Pcmt1,PDK2,PLSCR1,PSAP,PSMA1,RPL10,RPL12,Rpl34 (includes others),Rpl36,RPL5,RPL7,RPS12,RPS16,RPS18,RPS19,RPS20,RPS25,RPS26,RPS27L,RPS3,RPS5,SCD,SCO2,SCPEP1,SGPL1,SLC25A4,SRSF3,TALDO1,TANK,TKT,TMEM97,Tpm1,TXN2,VIM,YBX1	60 (3)	2	genistein				TP53
PYHIN1	other		2		0	1.11e-10	CDK2,MDM2,PYHIN1,TP53	ACSS2,ATP5S,BCL2L1,CENPE,Ces1b/Ces1c,CKMT2,COL6A2,COPB1,CPOX,CPT1A,CTSH,EEF1A1,FDXR,G6PC,GLB1,HDLBP,HRAS,ISG15,ITGAV,KCNMA1,KRT18,KRT8,LYZ,MVP,OAT,Pcmt1,PCYT1A,PDK2,PSAP,PSMA1,RPL10,RPL12,Rpl34 (includes others),Rpl36,RPL5,RPL7,RPS12,RPS16,RPS18,RPS19,RPS20,RPS25,RPS26,RPS27L,RPS3,RPS5,SCD,SCO2,SCPEP1,SGPL1,SLC25A4,SRSF3,TALDO1,TANK,TKT,TMEM97,Tpm1,TXN2,VIM,YBX1	60 (4)	3				CDKN1A,TP53
CDC14A	phosphatase		2		0.258	1.17e-10	CDC14A,IREB2,TP53	ACSS2,ATP5S,BCL2L1,CENPE,Ces1b/Ces1c,CKMT2,COL6A2,COPB1,CPOX,CPT1A,CTSH,EEF1A1,FDXR,FTL,G6PC,GLB1,HDLBP,HRAS,ISG15,ITGAV,KCNMA1,KRT18,KRT8,LYZ,MVP,OAT,Pcmt1,PDK2,PSAP,PSMA1,RPL10,RPL12,Rpl34 (includes others),Rpl36,RPL5,RPL7,RPS12,RPS16,RPS18,RPS19,RPS20,RPS25,RPS26,RPS27L,RPS3,RPS5,SCD,SCO2,SCPEP1,SGPL1,SLC25A4,SRSF3,TALDO1,TANK,TKT,TMEM97,Tpm1,TXN2,VIM,YBX1	60 (3)	2	RNF2			CDH1	TP53
ING1	transcription regulator		2		-0.258	1.17e-10	CASP3,ING1,TP53	ACSS2,ATP5S,BCL2L1,CENPE,Ces1b/Ces1c,CKMT2,COL6A2,COPB1,CPOX,CPT1A,CTSH,EEF1A1,FDXR,G6PC,GLB1,HDLBP,HRAS,ISG15,ITGAV,KCNMA1,KRT18,KRT8,LYZ,MVP,OAT,Pcmt1,PDK2,PSAP,PSMA1,RPL10,RPL12,Rpl34 (includes others),Rpl36,RPL5,RPL7,RPS12,RPS16,RPS18,RPS19,RPS20,RPS25,RPS26,RPS27L,RPS3,RPS5,SCD,SCO2,SCPEP1,SGPL1,SLC25A4,SRSF3,TALDO1,TANK,TKT,TMEM97,Tpm1,TPT1,TXN2,VIM,YBX1	60 (3)	3				CDKN1A,HSPA1A/HSPA1B,TP53	DIDO1,PPP2R1B,SPP1
SVIL	other		2		0	1.2e-10	RAC1,SVIL,TP53	ACSS2,ATP5S,BCL2L1,CENPE,Ces1b/Ces1c,CKMT2,COL6A2,COPB1,CPOX,CPT1A,CTSH,EEF1A1,FDXR,G6PC,GLB1,HDLBP,HRAS,ISG15,ITGAV,KCNMA1,KRT18,KRT6B,KRT8,LYZ,MVP,OAT,Pcmt1,PDK2,PSAP,PSMA1,RPL10,RPL12,Rpl34 (includes others),Rpl36,RPL5,RPL7,RPS12,RPS16,RPS18,RPS19,RPS20,RPS25,RPS26,RPS27L,RPS3,RPS5,SCD,SCO2,SCPEP1,SGPL1,SLC25A4,SRSF3,TALDO1,TANK,TKT,TMEM97,Tpm1,TXN2,VIM,YBX1	60 (3)	2	D-glucose			RAC1	TP53
PPP2R2A	phosphatase		2		-0.361	1.31e-10	Akt,ERK,ERK1/2,MAP2K1/2,PPP2R2A,RAF1,RBL1,Tgf beta,TP53	ACSS2,ATP5S,BHMT,CENPE,Ces1b/Ces1c,CKMT2,COL6A2,COPB1,CPOX,CPT1A,EEF1A1,FDXR,FHIT,G6PC,GLB1,GUSB,HDLBP,HRAS,Ighg2b,ISG15,KCNMA1,KIAA0391,KRT1,KRT18,KRT72,KRT8,LYZ,MGLL,MVP,OAT,Pcmt1,PDK2,PSAP,PSMA1,RPL10,RPL12,Rpl34 (includes others),Rpl36,RPL5,RPL7,RPS12,RPS16,RPS18,RPS19,RPS2,RPS20,RPS25,RPS26,RPS27L,RPS3,RPS5,SCD,SCO2,SCPEP1,SGPL1,SKP2,SLC25A4,SNRPD1,SPTBN1,SRSF3,TALDO1,TANK,TKT,TMEM97,Tpm1,TX…	69 (9)	8	FOS	sulindac sulfide		TP53
temozolomide	chemical drug		2		-0.232	1.37e-10	Akt,AKT1,AMPK,EGFR,MAPK14,NFkB (complex),P38 MAPK,temozolomide,TP53	ACSS2,ARG1,ATP5S,BCL2L1,BGN,CENPE,Ces1b/Ces1c,CKMT2,COL6A2,COPB1,CPOX,CTSH,EEF1A1,EIF4E,FDXR,FHIT,GLA,GLB1,HDLBP,HRAS,ISG15,ITGAV,KCNMA1,KIAA0391,KRT17,KRT18,KRT6B,KRT8,LYZ,MVP,NCL,NUTF2,OAT,Pcmt1,PDK2,PEX11A,PRDX1,PSAP,PSMA1,RAB5A,RPL10,RPL12,Rpl34 (includes others),Rpl36,RPL5,RPL7,RPS12,RPS16,RPS18,RPS19,RPS20,RPS25,RPS26,RPS27L,RPS3,RPS5,SCD,SCO2,SCPEP1,SERPINF1,SGPL1,SKP2,SLC25A4,SRSF1,SRSF3,…	74 (9)	9		APEX1		AMPK,CDKN1A,DDIT3,TP53	NFKBIA,PRL
ATG13	other		3		-0.258	1.38e-10	ATG13,BECN1,PTK2B,RB1CC1,TP53,ULK1	ACSS2,ATP5S,BCL2L1,CENPE,Ces1b/Ces1c,CKMT2,COL6A2,COPB1,CPOX,CPT1A,CTSH,EEF1A1,FDXR,G6PC,GLB1,HDLBP,HRAS,ISG15,ITGAV,KCNMA1,KRT18,KRT8,LYZ,MVP,OAT,Pcmt1,PDK2,PSAP,PSMA1,RPL10,RPL12,Rpl34 (includes others),Rpl36,RPL5,RPL7,RPS12,RPS16,RPS18,RPS19,RPS20,RPS25,RPS26,RPS27L,RPS3,RPS5,SCD,SCO2,SCPEP1,SGPL1,SLC25A4,SRSF3,TALDO1,TANK,TKT,TMEM97,Tpm1,TXN2,VIM,VPS35,YBX1	60 (6)	3	sirolimus	leucine
colcemid	chemical - endogenous non-mammalian		2		-0.372	1.39e-10	colcemid,MAPK1,TP53	ACSS2,ANPEP,ARSB,ATP5S,BCL2L1,CENPE,Ces1b/Ces1c,CKMT2,COL6A2,COPB1,CPOX,CPT1A,CTNNA2,CTSH,EEF1A1,FDXR,G6PC,GLB1,HDLBP,HRAS,ITGAV,KCNMA1,KRT17,KRT18,KRT8,LYZ,MVP,OAT,Pcmt1,PDK2,PLSCR1,PPT2,PSAP,PSMA1,RPL10,RPL12,Rpl34 (includes others),Rpl36,RPL5,RPL7,RPS12,RPS16,RPS18,RPS19,RPS20,RPS25,RPS26,RPS27L,RPS3,RPS5,SCD,SCO2,SCPEP1,SGPL1,SLC25A4,SRSF3,SUOX,TALDO1,TANK,TKT,TMEM97,Tpm1,TXN2,VIM,YBX1	65 (3)	2				MAPK3,TP53	CYP1A1,NQO1
NACA	transcription regulator		3		-0.097	1.41e-10	AHR,Akt,Ap1,CCND1,CD24,CSF2,ERBB2,ERK,ERK1/2,ESR2,estrogen receptor,FGFR3,FOS,geldanamycin,HSF1,Hsp90,HSP90B1,IL2,JUN,NACA,Nfat (family),P38 MAPK,PGR,PPARA,RAF1,SMAD3,STAT3,STK11,TLR4,TP53	ABCD2,ACOT2,ACP6,ACSS2,AK2,ANPEP,ASS1,ATP5S,BCL2L1,BCLAF1,BGN,BHMT,C8A,Ces1b/Ces1c,CKMT2,CNP,COPB1,CPOX,CTBS,CTSC,CTSH,DARS2,DCAF8,EEF1A1,EIF3A,EIF5,ELOVL5,FADS2,FARS2,FDXR,FHIT,FMO3,G6PD,GARS,GLB1,GM2A,HDLBP,HPD,HRAS,KCNMA1,KIAA0391,KRT1,KRT17,KRT6B,LYZ,MGLL,MOGS,Mup1 (includes others),MVP,NUS1,OAT,PAICS,Pcmt1,PCYT1A,PDK2,PEX1,PEX11A,PLA2G15,PSAP,PSMA1,RAB5A,RPL12,RPL13,RPL17,RPL21,RPL22,RPL30,R…	107 (30)	29	EPO,MYCN	5-fluorouracil,CD 437,ST1926
ochratoxin A	chemical toxicant		3		0.536	1.44e-10	Akt,AKT1,Alp,APEX1,BCL2,Calcineurin protein(s),CASP3,CASP9,CDK2,Creb,EIF2AK2,ERK1/2,GLUL,glutathione peroxidase,GPX1,IKBKB,IL18,Jnk,KSR1,L-glutamic acid,MAP3K1,Nfat (family),NFkB (complex),ochratoxin A,P38 MAPK,PRKCD,PRL,PTEN,Sod,TP53	ACSS2,ACY3,AKAP1,ATP5S,BCL2L1,BGN,BHMT,CENPE,CKMT2,COL6A2,COPB1,CPOX,CTSA,CTSZ,EEF1A1,FADS2,FHIT,GLA,GLB1,GM2A,GPX4,HDLBP,HRAS,IDE,Ighg2b,KCNMA1,KRT1,KRT17,KRT18,KRT5,KRT6B,KRT72,LYZ,MAN2B2,MGLL,MVP,NCL,NEU1,NUS1,OAT,Pcmt1,PCYT1A,PEX11A,PLD3,PLIN3,PLSCR1,PSAP,PSMA1,RAB5A,RPL10,RPL12,Rpl34 (includes others),Rpl36,RPL5,RPL7,RPS12,RPS16,RPS18,RPS19,RPS20,RPS25,RPS26,RPS27L,RPS3,RPS5,RPS6,RPSA,SCO2,S…	87 (30)	24		butylated hydroxyanisol			CDH1,creatine kinase,NQO1
SSRP1	transcription regulator		2		-0.254	1.45e-10	SRF,SSRP1,TP53	ACSS2,ATP5S,BCL2L1,CENPE,Ces1b/Ces1c,CKMT2,COL6A2,COPB1,CPOX,CPT1A,CTSH,EEF1A1,FDXR,G6PC,GLB1,HDLBP,HRAS,Igkv1-117,ISG15,ITGAV,KCNMA1,KRT18,KRT8,LYZ,MVP,OAT,Pcmt1,PDK2,PRG2,PSAP,PSMA1,RPL10,RPL12,Rpl34 (includes others),Rpl36,RPL5,RPL7,RPS12,RPS16,RPS18,RPS19,RPS20,RPS25,RPS26,RPS27L,RPS3,RPS5,SCD,SCO2,SCPEP1,SGPL1,SLC25A4,SRSF3,TALDO1,TANK,TKT,TMEM97,Tpm1,Tpm4,TXN2,VIM,YBX1	62 (3)	2	EPO	CSNK2A1		CDKN1A,TP53
15-deoxy-delta-12,14 -PGJ 2	chemical - endogenous mammalian		2	Inhibited	-2.331	1.47e-10	15-deoxy-delta-12,14 -PGJ 2,Akt,CHUK,CREB1,FOS,IKBKB,IKBKG,IL2,INSR,JAK2,MAPK1,MAPK14,NFE2L2,NFkB (complex),NFKB1,NFKBIA,NOS2,P38 MAPK,PI3K (complex),PPARA,PPARG,RB1,RELA,STAT3,STK11,TP53	ABCD2,ACOT2,ACP6,AGPAT3,AK2,ANPEP,ARSB,ASS1,BCL2L1,BGN,BHMT,C8A,CELA1,CENPE,Ces1b/Ces1c,COL6A2,COPB1,CPOX,CREG1,CTSC,CTSH,CTSZ,DARS2,EEF1A1,EIF3A,ELOVL5,FABP2,FADS2,FARS2,FHIT,GAA,GARS,GLA,GLB1,GM2A,HDLBP,HPD,IDE,KCNMA1,KRT17,MGLL,MRPL55,Mup1 (includes others),MVP,OAT,PDK2,PDXK,PECR,PEX1,PEX11A,PLD3,PLSCR1,PPT2,PRCP,PRDX1,PSAP,PSMA1,PSMD13,RAB5A,RACK1,RPL12,RPL21,RPL23,RPL27A,Rpl34 (includes othe…	106 (26)	26	palmitic acid			CDKN1A,cyclooxygenase,DDIT3,FOS,MAP3K5,NFE2L2,NFKBIA,NFKBIB,NQO1,PPARA,TP53	CCND1,Inflammasome (Nalp3, Asc, Casp1),MAPK3,MUC1,MYC,SPP1,SREBF1
NFKBIA	transcription regulator		2		1.376	1.5e-10	BCL2,CHUK,ERK,MAPK9,MTOR,NFKBIA,PTGS2,REL,TP53	ACSS2,AK2,ATP5S,BCL2L1,BGN,CENPE,Ces1b/Ces1c,CKMT2,CNP,COL6A2,COPB1,CPOX,CPT1A,CTSZ,EEF1A1,EIF3A,EIF4E,FADS2,FDXR,GLB1,GM2A,HDLBP,HRAS,Ighg2b,ISG15,ITGAV,KCNMA1,Krt10,KRT18,KRT8,LYZ,NCL,OAT,Pcmt1,PDK2,PLD3,PLSCR1,PSAP,PSMA1,RPL10,RPL23,RPL27A,Rpl34 (includes others),Rpl36,RPL5,RPL7,RPL8,RPS12,RPS16,RPS18,RPS19,RPS2,RPS20,RPS25,RPS26,RPS27L,RPS3,RPS5,RPSA,SCD,SCO2,SCPEP1,SGPL1,SKP2,SLC25A4,SND1,SP…	76 (9)	9	15-deoxy-delta-12,14 -PGJ 2,5-fluorouracil,carfilzomib,carrageenan,Chuk-Ikbkb-Ikbkg,ciprofibrate,CSNK2A1,D-glucose,GAB1,gamma-tocotrienol,gemfibrozil,HSPA1A/HSPA1B,Ins1,Insulin,KRAS,MAPK3,MUC1,N-nitro-L-arginine methyl ester,NCX-4040,nitrofurantoin,NQO1,PBK,PIK3R2,pirinixic acid,PPARA,PPARα-RXRα,RPS6KA2,S-nitrosoglutathione,S100A4,sirolimus,SPP1,TCR,TRAPPC9,troglitazone	5,8,11,14-eicosatetraynoic acid,Alpha catenin,alpha-pinene,arachidonic acid,arsenite,bardoxolone methyl,butylated hydroxyanisol,calpeptin,CAT,CD 437,COL4A3,CUL1,DNAJA3,epigallocatechin-gallate,FBXW11,genistein,HRAS,imatinib,L-triiodothyronine,linolenic acid,mannitol,mannosylated lipoarabinomannan,methotrexate,palmitic acid,PPP2R5C,PRKAA1,RAS,RBX1,Scf,sulindac sulfide,temozolomide,tempol,TO-901317…		ADAMTS5,CDH1,FOS,GADD45B,NAGLU,OPRD1,PRKACA,PTGS2	BOK,CCL11,CDKN1A,EPO,HSPA5,UBE3A
anagrelide	chemical drug		3		-0.93	1.5e-10	ADRB2,Akt,anagrelide,Creb,ERK1/2,MAPK1,PDE3A,PDE4B,PDE4D,PDE8A,RAF1,SCAP,SREBF2,TP53	ACY3,ANPEP,ARSB,ATP5S,BHMT,CENPE,Ces1b/Ces1c,CKMT2,COL6A2,COPB1,CPOX,CPT1A,CTNNA2,CTSH,EEF1A1,FADS2,FDXR,FHIT,G6PD,GLB1,HDLBP,HRAS,IDE,ISG15,KCNMA1,KIAA0391,KRT1,KRT17,KRT18,KRT8,LYZ,MGLL,OAT,Pcmt1,PCYT1A,PDK2,PLIN3,PLSCR1,PPT2,PSAP,PSMA1,RPL10,RPL12,Rpl34 (includes others),Rpl36,RPL5,RPL7,RPS12,RPS16,RPS18,RPS19,RPS2,RPS20,RPS25,RPS26,RPS27L,RPS3,RPS5,SCD,SCO2,SCPEP1,SGPL1,SLC25A4,SNRPD1,SRSF3,S…	74 (14)	9
PLX7486	chemical drug		3	Activated	2.178	1.53e-10	Akt,CDKN1B,Creb,CREB1,CSF1,CSF1R,CTNNB1,ERK,ERK1/2,HRAS,INPP5D,JAK2,MAPK1,Mek,NFkB (complex),NTRK1,NTRK2,NTRK3,P38 MAPK,PI3K (complex),Pkc(s),PLX7486,PPARG,RAC1,Raf,RAS,STAT3,TP53	ACSS2,ACY3,ANPEP,ARG1,ARSB,ATP5S,BCL2L1,BGN,BHMT,CENPE,CKMT2,COL6A2,COPB1,COPB2,CPOX,CTNNA2,CTSH,DDX25,EEF1A1,FABP2,FDXR,FHIT,G6PD,GAA,GLA,GLB1,HDLBP,HRAS,IDE,Ighg2b,IGKC,KCNMA1,KRT6B,KRT8,LYZ,MGLL,Mup1 (includes others),MVP,NLN,OAT,Pcmt1,PCYT1A,PDK2,PDXK,PEX1,PLIN3,PLSCR1,PRCP,PRDX1,PSAP,PSMA1,RAB5A,RPL10,RPL12,RPL23,RPL27A,RPL30,Rpl34 (includes others),Rpl36,RPL5,RPL7,RPS10,RPS12,RPS16,RPS18,RP…	93 (28)	25
DNAJA3	other	1.305	2		-1.026	1.54e-10	Akt,DNAJA3,EGFR,ERK,ERK1/2,NFkB (complex),NFKBIA,STAT3,TP53	ACSS2,AK2,ARG1,ATP5S,BGN,BHMT,CENPE,Ces1b/Ces1c,CKMT2,COL6A2,COPB1,CPOX,CPT1A,CTSH,CTSZ,EEF1A1,EIF4E,FDXR,FHIT,G6PC,GLA,GLB1,GM2A,HDLBP,HRAS,KCNMA1,KIAA0391,KRT17,KRT6B,KRT8,MVP,NCL,NUTF2,OAT,Pcmt1,PDK2,PEX1,PLD3,PSAP,PSMA1,RPL10,RPL12,RPL27A,Rpl34 (includes others),Rpl36,RPL5,RPL7,RPL8,RPS12,RPS16,RPS18,RPS19,RPS2,RPS20,RPS25,RPS26,RPS27L,RPS3,RPS5,RPSA,SCD,SCO2,SCPEP1,SGPL1,SKP2,SLC25A4,SPTBN1,…	77 (9)	8					NFKBIA
SKI	transcription regulator		2		-0.384	1.55e-10	CDK2,JUNB,RAS,SKI,TP53	ACSS2,ANPEP,ATP5S,BCL2L1,CENPE,Ces1b/Ces1c,CKMT2,COL6A2,COPB1,CPOX,CPT1A,CTSH,EEF1A1,FDXR,G6PC,GLB1,HDLBP,HRAS,ISG15,ITGAV,KCNMA1,KRT18,KRT8,LYZ,MVP,OAT,Pcmt1,PCYT1A,PDK2,PRDX1,PSAP,PSMA1,RPL10,RPL12,Rpl34 (includes others),Rpl36,RPL5,RPL7,RPS12,RPS16,RPS18,RPS19,RPS20,RPS25,RPS26,RPS27L,RPS3,RPS5,SCO2,SCPEP1,SGPL1,SLC25A4,SPTAN1,SRSF3,TALDO1,TANK,TKT,TMEM97,Tpm1,TXN2,YBX1	61 (5)	4	Insulin			CDH1,RAS	TP53
CHAF1A	other		2		-0.258	1.58e-10	ATR,BRCA1,CHAF1A,TP53	ACSS2,ATP5S,BCL2L1,CENPE,Ces1b/Ces1c,CKMT2,COL6A2,COPB1,CPOX,CPT1A,CTSH,EEF1A1,FDXR,G6PC,GLB1,HDLBP,HRAS,ISG15,ITGAV,KCNMA1,KRT17,KRT18,KRT8,LYZ,MVP,OAT,Pcmt1,PDK2,PLSCR1,PSAP,PSMA1,RPL10,RPL12,Rpl34 (includes others),Rpl36,RPL5,RPL7,RPS12,RPS16,RPS18,RPS19,RPS20,RPS25,RPS26,RPS27L,RPS3,RPS5,SCD,SCO2,SCPEP1,SGPL1,SLC25A4,SRSF3,TALDO1,TANK,TKT,TMEM97,Tpm1,TXN2,YBX1	60 (4)	3	DDIT3				TP53
ciprofibrate	chemical drug		2		-0.707	1.59e-10	ACOX1,CAT,ciprofibrate,PPARA	ABCD2,ACOT2,ACSS2,ARG1,ASS1,BCL2L1,C8A,CPOX,CPT1A,CTBS,ELOVL5,FABP2,FADS2,G6PC,G6PD,GPX4,HPD,KRT8,MGLL,Mup1 (includes others),Nat8f2,OAT,PEX11A,PLSCR1,RPL12,Rpl36,RPS24,SARDH,SCD,TALDO1,VIM,VNN1	32 (4)	4				8-oxo-7-hydrodeoxyguanosine,ACOX1,CAT,EHHADH,HSD17B4,Kap,NFKBIA,PPARA,RBM3	D-glucose,Ins1,Mup1 (includes others)
UBE2H	enzyme		3		-0.524	1.67e-10	Akt,AKT1,AKT3,BCAR1,BCL2,CD247,CDKN1A,CREB1,ERK,ERK1/2,Focal adhesion kinase,FOXO1,FOXO3,HMGA1,INSR,Insulin,IRS1,IRS2,MAPK1,Mek,NANOG,NFkB (complex),p70 S6k,PI3K (complex),RAC1,RAS,RNF128,SHC1,TP53,UBE2H	ACOT12,ACOT2,ACSS2,ACY3,ANPEP,ARG1,ARSB,BHMT,CDK5RAP3,CENPE,Ces1b/Ces1c,COL6A2,COPB1,CPOX,CTNNA2,CTSC,EEF1A1,FADS2,FHIT,FTL,G6PC,G6PD,GAA,GLA,GLB1,HDLBP,HNRNPK,HRAS,IDE,Ighg2b,KCNMA1,KRT18,KRT6B,KRT8,MAVS,MRPL45,MRPL47,MRPL55,OAT,Pcmt1,PDXK,PECR,PEX11A,PLIN3,PPT2,PRCP,PRDX1,PSAP,PSMA1,RALA,RPL10,RPL12,RPL23,Rpl34 (includes others),Rpl36,RPL5,RPL7,RPL7A,RPS12,RPS17,RPS18,RPS19,RPS20,RPS25,RPS26,RP…	91 (30)	28					Focal adhesion kinase
NR2F2	ligand-dependent nuclear receptor		2		0	1.68e-10	CEBPA,NR2F2,POU5F1,TP53	ACSS2,ARG1,ATP5S,BCL2L1,BHMT,CENPE,Ces1b/Ces1c,CKMT2,COL6A2,COPB1,CPOX,CPT1A,CREG1,CTSH,EEF1A1,EIF4E,FABP2,FDXR,G6PC,GGH,GLB1,HDLBP,HRAS,ISG15,ITGAV,KCNMA1,KRT17,KRT18,KRT8,LYZ,MVP,OAT,Pcmt1,PDK2,PSAP,PSMA1,RPL10,RPL12,Rpl34 (includes others),Rpl36,RPL5,RPL7,RPS12,RPS16,RPS18,RPS19,RPS20,RPS25,RPS26,RPS27L,RPS3,RPS5,SCO2,SCPEP1,SERPINF1,SGPL1,SLC25A4,SMPDL3A,SRSF3,TALDO1,TANK,TKT,TMEM97,Tpm1,TXN2…	68 (4)	3	troglitazone			TFAP2A,TP53	PPARA
AGT	growth factor		2	Inhibited	-2.475	1.68e-10	AGT,Akt,AKT1,AMPK,Ap1,Cdc42,CNR1,Creb,CREB1,EGFR,EIF2S1,EIF4E,ERK1/2,FN1,FOS,FOXO1,HDAC2,HIF1A,HRAS,IKBKB,INSR,JAK2,JUN,LIPE,MAP2K4,MAP3K1,MAPK1,MAPK14,MAPK9,Mek,MTOR,Nfat (family),NFkB (complex),NFKB1,nitric oxide,P38 MAPK,p70 S6k,Pkc(s),PKD1,PPARGC1A,PPP3R1,RAC1,RAF1,RAS,RELA,SHC1,SLC6A2,STAT3,STAT6,STK11,TGFB1,TP53	ACOT2,ACP6,ACSS2,ACY3,AK2,ANPEP,ARSB,BCLAF1,BGN,BHMT,CNP,COPB1,COPB2,CPOX,CTNNA2,CTSA,CXADR,DDB1,DDX25,DGUOK,EEF1A1,EIF3A,EIF4E,FABP2,FARS2,FDXR,FHIT,FTL,GAA,GARS,GLA,GLB1,HDLBP,HGD,HIST2H2AC,HRAS,Ighg2b,IGKC,ITGAV,KCNMA1,KIAA0391,KRT1,KRT6B,KRT8,LYZ,MAN2B2,MAVS,MGLL,MIA3,MOGS,MRPL45,MRPL47,MRPL55,NCL,NLN,NUS1,NUTF2,Pcmt1,PCYT1A,PECR,PEX1,PEX11A,PLIN3,PPT2,PRCP,PRDX1,PSAP,PSMA1,RAB5A,RAB9B,RACK1,…	119 (52)	52	D-glucose,Insulin,L-triiodothyronine,troglitazone,USF2	Ins1,KDM1A		ADIPOQ,BOK,CCND1,Cdc42,CDKN1A,Creb,CYP,EDNRA,ELAVL1,FASN,GFPT1,HRAS,HSPA1A/HSPA1B,IGF1R,IL15,IRS2,KRAS,MAPK3,mir-132,mir-7,MYC,pregnenolone,PRKACA,PTGS2,PTK2,RAS,SERPINB2,SPP1,TP53,TSH	ADAMTS5,AMPK,PRKAA,TXNIP
1,2-dioleoyloxy-3-(trimethylammonium)propane	chemical reagent		3		-0.198	1.69e-10	1,2-dioleoyloxy-3-(trimethylammonium)propane,Akt,CASP1,CHUK,EGFR,ERK,ERK1/2,Ifn,IFNG,IKBKB,IL1,IL10RA,IL12 (complex),IL18,IL1B,IL33,IRAK4,IRF5,IRF7,Jnk,MAPK14,MAPK8,MYD88,NFkB (complex),NFKB1,NFKBIA,P38 MAPK,PI3K (complex),RELA,STAT3,Tlr,TLR9,TP53	ACSS2,AK2,ARG1,ASS1,ATP5S,BCL2L1,BHMT,CELA1,CENPE,Ces1b/Ces1c,CKMT2,COL6A2,COPB1,CPOX,CPT1A,CTSC,Cyp2c40 (includes others),CYP2S1,Ear2 (includes others),EEF1A1,EIF4E,FHIT,FTL,G6PC,G6PD,GLA,GLB1,GM2A,GUSB,HAO2,HDLBP,HRAS,IDE,Ighg2a,Ighg2b,ISG15,KIAA0391,KRT17,KRT72,MAVS,MVP,NCL,Nnt,NUTF2,OAT,ORMDL2,Pcmt1,PDK2,PEX1,PLD3,PLSCR1,PPT2,PRDX1,PRG2,PSAP,PSMA1,RAB5A,RACK1,RPL10,RPL12,RPL23,RPL27A,Rpl34 (i…	102 (33)	32
RNF2	transcription regulator	-1.351	2		0.258	1.71e-10	H2AFZ,MDM2,RNF2,TP53	ACSS2,ATP5S,BCL2L1,CENPE,Ces1b/Ces1c,CKMT2,COL6A2,COPB1,CPOX,CPT1A,CTSH,EEF1A1,FDXR,G6PC,GLB1,HDLBP,HRAS,ISG15,ITGAV,KCNMA1,KRT18,KRT8,LYZ,MVP,OAT,Pcmt1,PDK2,PSAP,PSMA1,RPL10,RPL12,Rpl34 (includes others),Rpl36,RPL5,RPL7,RPS12,RPS16,RPS18,RPS19,RPS20,RPS25,RPS26,RPS27L,RPS3,RPS5,RPS6,SCD,SCO2,SCPEP1,SGPL1,SLC25A4,SRSF3,TALDO1,TANK,TKT,TMEM97,Tpm1,TXN2,VIM,YBX1	60 (4)	3		UBE3A		CDC14A	CDKN1A,SYCP3,TP53
SNCB	other		3		0.792	1.71e-10	26s Proteasome,Akt,AKT3,beta-estradiol,CASP3,CDKN1B,CDKN2A,CEBPA,CEBPB,CFTR,CHUK,Creb,E2F1,EIF4E,ERBB2,EZH2,FOXO1,GLI1,HIF1A,HNF4A,IGF1R,IREB2,MAP2K1,MAP3K1,MAPK1,Mek,MTOR,NANOG,NCOA1,Nfat (family),NFE2L2,NFKBIA,NOTCH1,NR4A1,P38 MAPK,PDX1,PGR,PI3K (complex),PPARG,PTEN,RB1,SNCB,SREBF1,SREBF2,STK11,tamoxifen,TP53,Vegf	ACP6,ACSS2,ACY3,AGPAT3,AKAP1,ARG1,ARSB,ATP5S,BCL2L1,CDK5RAP3,CELA1,CELSR3,CENPE,Ces1b/Ces1c,CHIA,CKMT2,CNP,COL6A2,COPB1,CPOX,CPT1A,CTBS,CTSA,CTSH,CTSZ,Cyp2c40 (includes others),DDX25,DGUOK,EEF1A1,FADS2,FDXR,FHIT,FMO3,FTL,FUCA1,G6PC,GAA,GARS,GGH,GLB1,GUSB,HDLBP,HIST2H2AC,HNRNPK,HPD,HRAS,Igkv1-117,ISG15,ITGAV,KCNMA1,KRT13,KRT18,KRT8,LYZ,MAN2B2,MAVS,MRPL45,MRPL47,MRPL55,MVP,NUS1,OAT,PAICS,Pcmt1,PDK2…	129 (48)	47					TP53
TP53	transcription regulator		1		-0.13	1.72e-10	TP53	ACSS2,ATP5S,BCL2L1,CENPE,Ces1b/Ces1c,CKMT2,COL6A2,COPB1,CPOX,CPT1A,CTSH,EEF1A1,FDXR,G6PC,GLB1,HDLBP,HRAS,ISG15,ITGAV,KCNMA1,KRT18,KRT8,LYZ,MVP,OAT,Pcmt1,PDK2,PSAP,PSMA1,RPL10,RPL12,Rpl34 (includes others),Rpl36,RPL5,RPL7,RPS12,RPS16,RPS18,RPS19,RPS20,RPS25,RPS26,RPS27L,RPS3,RPS5,SCD,SCO2,SCPEP1,SGPL1,SLC25A4,SRSF3,TALDO1,TANK,TKT,TMEM97,Tpm1,TXN2,VIM,YBX1	59 (1)	1	(diaminocyclohexane)(diacetato)(dichloro)platinum,15-deoxy-delta-12,14 -PGJ 2,2-deoxyglucose,3-methylcholanthrene,4-oxo-2-nonenal,5-fluorouracil,acadesine,AGT,arachidonic acid,arsenite,BANP,bryostatin 1,cadmium,calpeptin,CAMK2N2,CD 437,CDK5,clofibric acid,colcemid,Ctbp,DMTF1,ELAVL1,Ep300/Pcaf,epigallocatechin-gallate,genistein,gossypol,harmine,HERC2,HINT1,idarubicin,ING1,IP6K2,Jmy-p300,L-triiodot…	ACOX1,arsenic,AZD5438,CDC14A,CDC14B,CHAF1A,Creb,CUL1,EPO,FGF3,HUWE1,imatinib,MDC1,miR-542-3p (miRNAs w/seed GUGACAG),MLXIPL,NFAT5,NFE2L2,NOP53,pergolide,PPP2R5C,RNF2,RPS6KB2,sirolimus,SIRT7,SKI,SNCB,SRSF2,SVIL,tempol,TRH,UBE3A,UBE4B,Ubiquitin,YY1		BOK,Cdc42,CYP1A1,DDIT3,DOK1,GPI,mir-132,NCK2,PDE2A,RAS,RBM3,RPS6KA2,SERPINB2,SNAI1,TSC2,YWHAH	ACLY,ADA,AKT3,BLM,CDH1,CENPF,CKS1B,creatine kinase,EDNRA,FASN,HLA-B,HSPH1,IL16,IL21R,ITGA2B,KRT14,LGALS3,miR-142-3p (and other miRNAs w/seed GUAGUGU),NEK2,PBK,PFKFB1,PIK3CB,PLAUR,PPARA,TRAP1
spiperone	chemical drug		3		0.413	2.11e-10	Akt,AKT1,AMPK,BCAR1,CD247,CFTR,Creb,CSF1R,EGFR,EIF2S1,ERK,ERK1/2,ESR1,Focal adhesion kinase,HDAC2,HRH1,IGF1R,INSR,Insulin,IRS1,IRS2,JAK2,LEPR,MAPK1,MAPK14,MAPK8,Nfat (family),NFkB (complex),NFKBIA,P38 MAPK,PI3K (complex),PTPN1,RAF1,RAS,SMAD3,spiperone,STAT3,STAT5A,STAT6	ACOT12,ACOT2,ACY3,AK2,ANO10,AP3B1,ARSB,ASS1,ATP5S,BCLAF1,BHMT,CENPE,Ces1b/Ces1c,CKMT2,COL6A2,COPA,CPOX,CPT1A,CTNNA2,CTSC,CTSH,CTSZ,CXADR,Cyp2c40 (includes others),EIF3A,EIF4E,FABP2,FADS2,FDXR,FHIT,FTL,G6PC,G6PD,GLA,GM2A,GYS2,HNRNPK,HRAS,IDE,Ighg2b,KCNMA1,KIAA0391,KRT1,Krt10,KRT18,KRT8,LYZ,MGLL,MINOS1,MVP,NCL,NUS1,NUTF2,OAT,OS9,PDK2,PECR,PEX1,PEX11A,PLD3,PLIN3,PLSCR1,PPT2,PRDX1,RAB5A,RALA,RNASET2,…	94 (39)	36				CFTR
ACOX1	enzyme	-1.338	1		1.213	2.58e-10	ACOX1	ACOT2,CPOX,CTBS,FABP2,G6PC,GPX4,HPD,KRT8,MGLL,Mup1 (includes others),Nat8f2,OAT,PEX11A,PLSCR1,RPL12,Rpl36,RPS24	17 (1)	1	ADIPOQ,ALOX5,arachidonic acid,ciprofibrate,clofibric acid,D-glucose,dehydroepiandrosterone sulfate,docosahexaenoic acid,gemfibrozil,oxadiazon,PCGEM1,pirinixic acid,PPARα-RXRα,PRKAA,TRIB1	HSD17B4,L-triiodothyronine,methotrexate,nitrofurantoin,TO-901317		Mup1 (includes others)	CAT,CDKN1A,DDIT3,HSPA5,Kap,LGALS3,NFE2L2,RBM3,TP53,XBP1
Triton X-100	chemical reagent		3		-0.777	3.21e-10	Acox,AGT,AKT1,Ap1,Ca2+,Cdc42,CHUK,Creb,CREB1,CTNNB1,DGAT1,EGFR,EGR1,EPB41,ERBB2,ERK,ERK1/2,ERN1,FOS,FOXO1,FOXO3,GAB1,GAST,GUCY,HIF1A,HRAS,IKBKB,ITCH,JAK2,KRAS,LIPE,MAP2K4,MAPK1,MAPK14,Mek,MTOR,NFkB (complex),NFKBIA,nitric oxide,P38 MAPK,PGR,PPARA,RAC1,RAS,SHC1,SP1,SPHK1,STAT3,STAT5B,STAT6,Triton X-100	ABCD2,ACOT2,ACSS2,ACY3,AK2,ANPEP,ARG1,ARSB,ASS1,BCL2L1,BHMT,C8A,CDK5RAP3,Ces1b/Ces1c,CKMT2,CNP,COL6A2,COPB2,CPOX,CPT1A,CTBS,CTNNA2,CTSA,CTSH,CTSZ,CXADR,EEF1A1,EIF3A,EIF4E,EIF5,ELOVL5,FADS2,FARS2,FDXR,FTL,GLA,GM2A,GUSB,HDLBP,HIST2H2AC,HPD,HRAS,Ighg2b,IGKC,KIAA0391,KRT1,KRT17,KRT6B,LYZ,MAVS,MRPL45,MRPL47,MRPL55,MTRR,Mup1 (includes others),NCL,NLN,NUTF2,PAICS,PCYT1A,PDXK,PEX1,PLD3,PLIN3,PPT2,PRCP,PR…	106 (51)	48
CD 437	chemical drug		1	Activated	2.524	2.39e-09	CD 437	AK2,ARSA,FTL,RPL10,RPL11,RPL13,RPL13A,RPL24,RPL8,RPLP2,RPS10,RPS15,RPS16,RPS17,RPS2,SET,SRSF3,TIMM8B,YBX1	19 (1)	1				CDKN1A,FOS,MYC,TP53	ARHGDIB,EIF4B,NACA,NFKBIA,RBX1,RYBP
YWHAH	transcription regulator		3	Inhibited	-2.964	2.42e-09	26s Proteasome,AIMP2,Akt,AKT1,BCL2,CDK5,CREB1,CTNNB1,EGFR,ERK,ERK1/2,FOXO1,GCK,HRAS,IKBKB,MAPK1,MCL1,Mek,MYOD1,NFE2L2,NFKB1,NFKBIA,NOTCH1,NUMBL,P38 MAPK,p70 S6k,PRKN,RAF1,SEPT5,STAT3,TFEB,YWHAH	AGPAT3,AK2,ANPEP,ARSA,ARSB,BHMT,CDK5RAP3,CELA1,CENPE,Ces1b/Ces1c,CKMT2,COL6A2,COPB2,CREG1,CTNNA2,CTSH,EEF1A1,EIF4E,FDXR,FHIT,FTL,G6PD,GAA,GALNS,GLB1,IDE,Ighg2b,IGKC,KCNMA1,KIAA0391,KRT18,LYZ,MAVS,MGLL,MRPL45,MRPL47,MRPL55,Mup1 (includes others),NCL,NEU1,NLN,NUTF2,OAT,PDK2,PDXK,PEX1,PEX11A,PPT2,PRCP,PRDX1,PSMA1,PSMD13,RAB5A,RACK1,RALA,RPL23,RPL27A,RPL30,RPL7A,RPL8,RPLP0,RPS10,RPS16,RPS18,RPS2,RPS3…	83 (32)	30	TP53
cAMP-dependent protein kinase	complex		2		-0.13	5.13e-09	ACACA,ACLY,cAMP-dependent protein kinase,Creb,CREB1,DMD,FOS,ITPR1,ITPR2,ITPR3,LIPE,PGR,PLP1,PPP1R1B,PRKACA,PRL,Ras homolog,SPP1,STK11	ACP6,ACY3,AK2,ARG1,ASS1,BGN,COL6A2,CPT1A,CTBS,CTNNA2,CTSA,CTSH,EIF3A,EPDR1,FARS2,G6PC,GAA,GLA,GPX4,IDE,ISG15,ITGAV,KRT1,KRT18,KRT5,KRT72,KRT8,MVP,PDK2,PDXK,PLIN3,PLSCR1,PRCP,RPL9,RPLP0,RPS18,RPS24,RPS6,RPS7,RPS9,RPSA,SARDH,SCD,SELENOW,SEPT2,SERPINF1,SNAP23,SND1,SNTB2,SRSF3,STARD10,SYNJ2,TALDO1,TECR,THRSP,TKT,Tpm4,TPT1,TXNRD1	59 (19)	18	GCG,TSH			Creb,FOS,ITPR3,PDC,PPP1R1B,RAP1GAP,SPP1	ACLY,PRL
pregnenolone	chemical - endogenous mammalian		3	Inhibited	-2.411	7.39e-09	AKT1,AR,CCNE1,corticosterone,CREB1,CREBBP,CRH,cyclic AMP,EGFR,ERBB2,ERK1/2,ESR1,FAAH,FOXO3,HNF4A,MAPK1,MAPK14,Mek,Nfat (family),NFKBIA,NR1I2,NR3C2,NR4A1,PLAT,pregnenolone,RELA,SHC1,SMAD3,SREBF2,TERT	AK2,ANO10,AP3B1,ARSB,BCL2L1,BCLAF1,BHMT,CENPE,Ces1b/Ces1c,COPA,CPOX,CPT1A,CTNNA2,CTSC,CTSZ,CXADR,EIF4E,FADS2,FMO3,FTL,GAA,GLB1,GM2A,GUSB,HPD,IDE,KCNMA1,KIAA0391,KRT1,Krt10,KRT18,MINOS1,Mup1 (includes others),MVP,Nat8f2,NCL,NUS1,NUTF2,OAT,OS9,PAICS,PCYT1A,PDXK,PEX11A,PLD3,PPT2,PRCP,PRDX1,PSAP,RPL17,RPL23,RPL27A,RPL5,RPL7,RPL8,RPLP0,RPS10,RPS18,RPS2,Rps3a1,RPS6,RPSA,SCD,SCO2,SEC63,SERPINF1,SKP2,SLC…	91 (30)	29	AGT,GSTA1,PRL	FGF9
CYTH2	other		3		-1.572	7.89e-09	AKT1,AMPK,Ap1,AR,ARF1,ARF6,BCL2,CDKN1B,CHUK,Creb,CREB1,CYTH2,EGF,EGFR,EIF4E,ERBB2,ERK,ERK1/2,FOXO1,GAB1,GATA4,HRAS,IKBKB,MAP2K1,MAPK1,Mek,MYOD1,NFE2L2,NFkB (complex),NFKB1,NR4A1,PI3K (complex),Pkc(s),RAC1,RAF1,RELA,SHC1,STK11	ACOT2,ACP6,ACY3,AGPAT3,AK2,ANPEP,ARSB,BCL2L1,BCLAF1,BHMT,CDK5RAP3,CELA1,CENPE,Ces1b/Ces1c,CKMT2,COL6A2,COPB2,CREG1,CTNNA2,CTSH,CTSZ,DDX25,DGUOK,EIF3A,FTL,G6PD,GAA,GLA,GM2A,GUSB,HNRNPK,HRAS,IDE,Ighg2b,IGKC,ISG15,KIAA0391,KRT18,KRT5,KRT6B,KRT72,KRT8,MAVS,MGLL,MRPL45,MRPL47,MRPL55,NLN,NUTF2,OAT,PAICS,PDXK,PEX11A,PLD3,PLIN3,PRCP,PSMA1,PSMD13,RACK1,RALA,RPL17,RPL23,RPL27A,RPL30,RPL7A,RPLP0,RPS10,RPS16…	91 (38)	36	MYC
FABP1	transporter	1.016	2	Inhibited	-2.353	1.26e-08	FAAH,FABP1,GPAM,LIPE,PPARA	ABCD2,ACOT2,ARG1,ASS1,BCL2L1,C8A,CPT1A,ELOVL5,FADS2,G6PC,G6PD,HPD,Mup1 (includes others),PEX11A,RPL17,RPL5,RPL7,RPS18,RPS2,Rps3a1,RPS6,SARDH,SCD,TALDO1,THRSP,VNN1	26 (5)	4	ALOX5,arachidonic acid,L-triiodothyronine,linolenic acid,MYC,nicotinic acid,oleic acid,pirinixic acid	1,2-dithiol-3-thione,methapyrilene,NFE2L2,nitrofurantoin,PML,taspoglutide		GPAM,oleoylethanolamide	FAAH,FGF19
NF1	other		2		0.42	1.47e-08	Creb,ERK,GNAS,HRAS,JUN,KRAS,MAPK1,MTOR,NF1,RAC1,RAS	ACY3,ANPEP,ARSB,BCL2L1,CNP,COPB2,CPT1A,CTNNA2,CXADR,EEF1A1,EIF3A,EIF5,G6PC,G6PD,GUSB,IGKC,ISG15,KRT1,KRT17,KRT6B,MOGS,MTRR,MVP,NCL,NLN,PCYT1A,PLIN3,PLSCR1,PPT2,PRDX1,RPL10A,RPL12,RPL21,RPL23,RPL27A,RPL30,RPS10,RPS18,RPS19,RPS3,RPSA,SCD,SKP2,SND1,SPTBN1,SUOX,TMEM109,Tpm1,Tpm4,VIM,VPS35	51 (11)	11				Creb,HRAS	CCND1,KRAS,MAPK3,MYC,RAC1,RAS
ST1926	chemical drug		1	Activated	2.5	1.8e-08	ST1926	AK2,ARSA,RPL10,RPL13,RPL18A,RPL24,RPL6,RPL8,RPS10,RPS15,RPS2,RPS26,SRSF3,TIMM8B,TPT1,YBX1	16 (1)	1				CDKN1A,TP53	EIF4B,NACA,RBX1,RYBP
PRKACA	kinase		2		-0.436	3.03e-08	26s Proteasome,ADRB2,CEBPB,CFTR,Creb,CREB1,CREM,DDIT3,EGFR,ERK1/2,ERN1,ETV5,FOS,FOXO1,HSF1,HSPA5,LIPE,Mek,PNPLA2,PPARA,PPP1R1B,PRKACA,PSEN1,RASGRF1,RB1,RELA,SOX9,STK11,TGM2,WT1	ABCD2,ACOT2,ACP6,ACY3,AK2,ANPEP,ASS1,BHMT,C8A,CDK5RAP3,CENPE,CKMT2,COL6A2,CPT1A,CTNNA2,CTSA,CTSC,CTSZ,Cyp2c40 (includes others),EIF3A,EIF4E,ELOVL5,FABP2,FARS2,FTL,G6PC,G6PD,GAA,GLA,GM2A,HDLBP,HPD,HRAS,IDE,IGKC,KIAA0391,KRT17,KRT18,LYZ,MAVS,MRPL45,MRPL47,MRPL55,Mup1 (includes others),NCL,NLN,NUTF2,OS9,PDXK,PEX11A,PLIN3,PLSCR1,PRCP,PRG2,PSAP,RPL22,RPL23,RPL9,RPLP0,RPS18,RPS24,RPS6,RPS7,RPS9,SARDH,S…	84 (30)	30	AGT,cocaine,GCG,Insulin,NFKBIA,PTGS2	benzyloxycarbonyl-Leu-Leu-Leu aldehyde,docosahexaenoic acid,FMR1,NFKBIB,PRKAA		ALOX5,CCND1,CFTR,Creb,DDIT3,FOS,HSPA1A/HSPA1B,HSPA5,PDC,PFKFB1,PPARA,PRL,RBBP4	GFPT1,MYC
asenapine	chemical drug		3		1.612	3.48e-08	ADORA2A,ADRA1A,ADRA1B,ADRA1D,ADRA2A,ADRA2B,ADRA2C,Akt,AKT1,AMPK,asenapine,Creb,CREB1,DRD1,DRD2,DRD3,DUSP1,EGFR,ERK,ERK1/2,FOS,GNA12,HRH1,HTR1A,HTR1B,HTR2A,HTR2B,HTR7,JAK2,MAPK14,Nfat (family),NOS2,P38 MAPK,p70 S6k,PI3K (complex),PRL,PTK2,RAF1,RAS,SLC6A3,TGM2	ACSS2,ACY3,BGN,BHMT,Ces1b/Ces1c,COL6A2,CTSA,CTSC,EEF1A1,EIF4E,FARS2,FDXR,FHIT,GAA,GLA,GM2A,HNRNPK,IDE,KRT1,KRT18,KRT5,KRT72,KRT8,NCL,NLN,NUS1,NUTF2,PDK2,PDXK,PLIN3,PRCP,PRDX1,PSAP,RAB5A,RALA,RPL23,RPL9,RPLP0,RPS18,RPS2,RPS24,RPS6,RPS7,RPS9,RPSA,SCD,SERPINF1,SET,SKP2,SLC7A2,SNAP23,SND1,SNRPD1,SPTBN1,SRSF1,SYNJ2,TECR,TKT,Tpm1,Tpm4,TPT1,TXNRD1,UBE2L3,VNN1,YBX1	65 (41)	26
tamsulosin	chemical drug		3		1	3.72e-08	ADORA2A,ADRA1A,ADRA1B,ADRA1D,ADRA2A,ADRA2B,ADRA2C,Akt,AKT1,CACNA1D,Creb,CREB1,cyclic AMP,DRD2,DRD3,EGFR,ERK,ERK1/2,FOS,GNA12,HTR1A,HTR1B,HTR7,MAPK14,MAPK9,p70 S6k,PI3K (complex),PPP1R1B,PRL,PTK2,RAF1,RAS,SLC6A3,tamsulosin,TGM2	ACSS2,ACY3,ASS1,BGN,BHMT,Ces1b/Ces1c,COL6A2,CTSA,EEF1A1,EIF4E,FARS2,FHIT,GAA,GLA,GM2A,HNRNPK,IDE,KRT1,KRT18,KRT5,KRT72,KRT8,MGLL,NCL,NLN,NUTF2,OAT,PDK2,PDXK,PEX11A,PLIN3,PRCP,PRDX1,PSAP,RALA,RPL23,RPL9,RPLP0,RPS18,RPS2,RPS24,RPS6,RPS7,RPS9,RPSA,SCD,SERPINF1,SKP2,SLC7A2,SNAP23,SND1,SNRPD1,SPTBN1,SRSF1,SRSF3,SYNJ2,TECR,THRSP,Tpm1,Tpm4,TPT1,TXNRD1,UBE2L3,VNN1	64 (35)	23					FOS
GRB14	other		3		1.118	3.93e-08	26s Proteasome,BCAR1,CAV1,CD247,EGFR,ESR1,GRB14,INSR,LEPR,MAPK1,MAPK8,NFE2L2,NR1H3,P38 MAPK,PDX1,PPARA,PRKCI,PTK6,PTPN1,RAF1,RELA,SREBF1,STAT5A,STAT6,sterol,VAV3	ABCD2,ACOT2,AGPAT3,ANO10,AP3B1,ARSB,ATP5S,BCL2L1,BCLAF1,BHMT,C8A,CELA1,CKMT2,COL6A2,COPA,COPB2,CPOX,CREG1,CTNNA2,CTSA,CTSC,CTSH,CXADR,EIF3A,EIF4E,ELOVL5,FABP2,FDXR,FTL,G6PC,G6PD,GLB1,GUSB,GYS2,HPD,IDE,Ighg2b,KCNMA1,KIAA0391,Krt10,MGLL,MINOS1,MOGS,Mup1 (includes others),MVP,NCL,NUTF2,OS9,PECR,PLSCR1,PPT2,PRDX1,PSAP,PSMA1,PSMD13,RAB5A,RACK1,RALA,RPLP0,RPS16,RPS17,RPS2,SARDH,SCD,SCO2,SEC63,SLC7A2,SN…	80 (26)	24	Ins1,Insulin			D-glucose	NFE2L2
HLA-B	transmembrane receptor		3	Inhibited	-2.325	4e-08	Akt,ATF4,BCL2L1,CDK2,DDIT3,EIF2A,EIF2AK3,EPO,ERK1/2,ERN1,FOXO1,FOXO3,HIF1A,HLA-B,Ifn,MAPK1,NFE2L2,NOS2,P38 MAPK,PPARG,PPP3CA,SLC29A1,SMAD3,Srebp,STAT1,STAT3,STAT5A,STK11,TSC2	ACP6,ACSS2,AGPAT3,AK2,ANPEP,ARG1,ARSB,ASS1,BCL2L1,BHMT,CDK5RAP3,CELA1,COL6A2,CPOX,CTNNA2,CTSC,DPP7,EIF3A,EIF4E,FABP2,FHIT,FTL,G6PD,GARS,GYS2,HDLBP,HIST2H2AC,IDE,ISG15,KRT18,KRT5,KRT8,LYZ,MAVS,MGLL,MRPL45,MRPL47,MRPL55,MVP,NEU1,PCYT1A,PEX1,PEX11A,PPT2,PRDX1,PRELP,PSMA1,PSMD13,RAB5A,RACK1,RPL10A,RPL3,RPLP0,RPS16,RPS27L,RPSA,SARDH,SCPEP1,SERPINF1,SLC25A4,SMPDL3A,SNAP23,SPTAN1,SRSF1,SRSF6,STARD10,SUO…	74 (29)	26		MYC,sirolimus,TP53		XBP1
buspirone	chemical drug		3		1.75	4.2e-08	ADORA2A,ADRA1A,ADRA1B,ADRA1D,ADRA2A,ADRA2B,ADRA2C,Akt,AKT1,AMPK,buspirone,Creb,CREB1,DRD1,DRD2,DRD3,DRD5,DUSP1,EGFR,ERK,ERK1/2,FOS,HRH1,HTR1A,HTR1B,HTR2A,HTR2B,JAK2,MAPK14,Nfat (family),NOS2,P38 MAPK,p70 S6k,PI3K (complex),PRL,PTK2,RAF1,RAS,SLC6A3,TGM2	ACSS2,ACY3,BGN,BHMT,Ces1b/Ces1c,COL6A2,CTSA,CTSC,EEF1A1,EIF4E,FARS2,FDXR,FHIT,GAA,GLA,GM2A,HNRNPK,IDE,KRT1,KRT18,KRT5,KRT72,KRT8,NCL,NLN,NUS1,NUTF2,PDK2,PDXK,PLIN3,PRCP,PRDX1,PSAP,RAB5A,RALA,RPL23,RPL9,RPLP0,RPS18,RPS2,RPS24,RPS6,RPS7,RPS9,RPSA,SCD,SERPINF1,SET,SKP2,SLC7A2,SNAP23,SND1,SNRPD1,SPTBN1,SRSF1,SYNJ2,TECR,TKT,Tpm1,Tpm4,TPT1,UBE2L3,VNN1,YBX1	64 (40)	25
benzyloxycarbonyl-Leu-Leu-Leu aldehyde	chemical - protease inhibitor		2		-0.447	5.5e-08	26s Proteasome,Akt,AQP1,BCL2,benzyloxycarbonyl-Leu-Leu-Leu aldehyde,CCND1,CDKN1A,CFLAR,CFTR,EGFR,EIF2S1,ERK1/2,ETV5,FBXO32,FOS,HSF1,HSF2,JAK2,Jnk,JUN,MAP3K7,MAPK8,MAPK9,NFE2L2,NFkB (complex),NFKB1,NOTCH1,P38 MAPK,PPARA,PSMB9,PTGS2,STAT1,STAT5B	ABCD2,ACOT2,ACSS2,AGPAT3,AK2,ASS1,BCL2L1,BCLAF1,BGN,BHMT,C8A,CDK5RAP3,CELA1,CENPE,CKMT2,COL6A2,CREG1,CTSA,CTSH,Cyp2c40 (includes others),EIF4E,EIF5,ELOVL5,FABP2,FARS2,FDXR,FHIT,FTL,GAA,GLA,GLB1,HPD,HRAS,IDE,Ighg2b,ISG15,KIAA0391,KRT1,Krt10,KRT18,LYZ,MGLL,MOGS,Mup1 (includes others),MVP,NCL,NUTF2,PEX11A,PLSCR1,PSAP,PSMA1,PSMD13,RAB5A,RACK1,RPL10,RPL13,RPL22,RPL27A,RPL9,RPLP0,RPLP2,RPS16,RPS18,RPS2…	80 (33)	33				CAT,CCND1,CDH1,CDKN1A,CYP1A1,DDIT3,FMR1,FOS,HSF2,HSP,HSP90B1,HSPA5,IRS2,ITPR3,MST1R,MYC,MYCN,N-cor,NCOR1,NFE2L2,NQO1,OPRD1,RAC1,UBE3A,WAS	AMPK,CFTR,Ctbp,cyclooxygenase,Focal adhesion kinase,Ikb,PRKACA,PRLR,PTGS2,Ubiquitin,USF2
butylated hydroxyanisol	chemical toxicant		2	Inhibited	-3.96	5.72e-08	butylated hydroxyanisol,ERK1/2,INSR,Jnk,MAPK1,MAPK8,NFE2L2,NFKBIA,P38 MAPK	ACOT2,AGPAT3,AK2,ANPEP,ARSB,ASS1,ATP5S,BGN,CELA1,CKMT2,CREG1,CTNNA2,CTSZ,FDXR,FTL,G6PC,G6PD,GM2A,IDE,ISG15,KRT17,KRT18,KRT8,MGLL,MOGS,PECR,PLD3,PLSCR1,PPT2,PRDX1,PSMA1,PSMD13,RAB5A,RACK1,RPL27A,RPL8,RPLP0,RPS16,RPS18,RPS2,RPSA,SPTBN1,SUOX,TALDO1,THRSP,TKT,Tpm1,TXNRD1,VIM,VNN1	50 (9)	8				FOS,NQO1	GSTA1,NFKBIA,ochratoxin A
ADA	enzyme		3		1.344	8.41e-08	ADA,adenosine,ADORA2A,ADORA2B,Akt,AKT1,AMPK,APEX1,C3,Ca2+,CD247,Cdc42,CFTR,CHUK,Creb,CREB1,cyclic AMP,EIF2S1,ERN1,FOS,HRAS,IKBKB,LRP1,MTOR,Nfat (family),NFKB1,NFKBIA,nitric oxide,NR4A2,P38 MAPK,Pde,PI3K (complex),PLAT,Pld,PLG,SPHK1,STAT1,STAT3	ACY3,AK2,ARG1,ASS1,Ces1b/Ces1c,CNP,COL6A2,COPB2,CTSA,CTSH,Cyp2c40 (includes others),CYP2S1,EIF3A,FADS2,FARS2,FDXR,FHIT,G6PD,GAA,GM2A,GUSB,HDLBP,HNRNPK,HRAS,IDE,Ighg2b,IGKC,KCNMA1,KRT1,LYZ,MVP,NCL,NLN,NUS1,PCYT1A,PDXK,PEX1,PEX11A,PLD3,PLIN3,PRCP,RAB5A,RALA,RPL12,RPL23,RPL30,RPL8,RPL9,RPLP0,RPS10,RPS17,RPS2,RPS24,RPS3,RPS7,RPS9,RPSA,SLC25A4,SNAP23,SND1,SYNJ2,TANK,THRSP,TPT1,TXNRD1,UBE2L3,YBX1	67 (38)	33		TP53		Pde3	ADORA1,CCL11,SPP1
dihydroergotamine	chemical drug		3		-0.962	8.41e-08	ADORA2A,ADRA1A,ADRA1B,AKT1,Creb,CREB1,cyclic AMP,dihydroergotamine,DRD2,DRD3,FOS,HTR1A,HTR1B,HTR2A,HTR2B,JAK2,MAPK14,NOS2,p70 S6k,PI3K (complex),PPP1R1B,PRL,RAF1,SLC6A3,TGM2	ACSS2,ACY3,Ces1b/Ces1c,CTSA,CTSC,EEF1A1,FARS2,G6PD,GAA,GLA,GM2A,HNRNPK,IDE,KRT1,KRT5,KRT72,KRT8,MGLL,NLN,OAT,PDK2,PDXK,PEX11A,PLIN3,PRCP,PRDX1,PSAP,RALA,RPL23,RPL9,RPLP0,RPS18,RPS2,RPS24,RPS6,RPS7,RPS9,RPSA,SERPINF1,SET,SLC7A2,SNAP23,SND1,SNRPD1,SRSF3,SYNJ2,TECR,THRSP,TKT,Tpm1,Tpm4,TPT1,UBE2L3	53 (25)	17
CXCL14	cytokine		3		-1.455	1.49e-07	26s Proteasome,Creb,CXCL14,EGFR,ERK,ERK1/2,GABA,IRF3,MAPK1,Mek,Nfat (family),NFE2L2,NFkB (complex),NFKB1,P38 MAPK,Pkc(s),PRL,PTK2,RAF1,Rap1,RASSF5,RELA,SMAD3,SRF	ACY3,AGPAT3,ARSB,ASS1,BCL2L1,BHMT,BZW1,CELA1,CENPE,COL6A2,CREG1,CTNNA2,CTSA,CTSH,EIF4E,FDXR,FTL,G6PC,G6PD,GLA,IDE,Igkv1-117,ISG15,KIAA0391,KRT1,KRT18,KRT5,KRT72,KRT8,MGLL,MOGS,MVP,NCL,NUS1,NUTF2,PDK2,PLIN3,PPT2,PRDX1,PRG2,PSAP,PSMA1,PSMD13,RAB5A,RACK1,RPL23,RPLP0,RPS15,RPS16,RPS2,RPSA,SCO2,SKP2,SLC25A4,SND1,SNRPD1,SPTBN1,SRSF1,SUOX,TALDO1,TANK,TECR,THRSP,TKT,Tpm1,Tpm4,TXNRD1,VNN1	68 (24)	21		N-cor		CDH1,D-glucose,Ins1,NFE2L2
GIP	other		2		-1.912	1.53e-07	Akt,AKT1,AMPK,Creb,CREB1,ERK1/2,FOXO1,GAB1,GIP,IKBKB,Ins1,Insulin,MAPK1,P38 MAPK,p70 S6k,PI3K (complex),RAC1,RAF1,SPP1,STK11	ACOT12,ACP6,ACY3,AK2,ANPEP,ARG1,ARSB,ASS1,BGN,BHMT,CDK5RAP3,Ces1b/Ces1c,CKMT2,CTNNA2,CTSH,CTSZ,EEF1A1,EIF3A,EPDR1,FADS2,FDXR,FHIT,FTL,G6PD,GAA,GLA,GM2A,GPX4,HRAS,IDE,KIAA0391,KRT1,KRT17,KRT6B,KRT8,MAVS,MGLL,MRPL45,MRPL47,MRPL55,MVP,OAT,PDK2,PDXK,PEX11A,PLD3,PPT2,PRCP,RAB5A,RPL23,RPS16,RPS2,RPS6,SARDH,SCD,SELENOW,SKP2,SNRPD1,SRSF3,STARD10,SUOX,SYNJ2,TALDO1,TKT,Tpm4,TPT1,TXNRD1,UBE2L3,VNN1,YBX1	70 (20)	19				ADIPOQ,Creb,FOS,GAB1,Ins1,Insulin,IRS2,MAPK3,PIK3CB,RAC1,SPP1	AMPK
benzyl isothiocyanate	chemical - endogenous non-mammalian		2		-1.786	1.73e-07	Akt,BCL2,BCL2L1,benzyl isothiocyanate,FOXO1,FOXO3,JINK1/2,MAPK8,MCL1,MTOR,NFE2L2,NFkB (complex),P38 MAPK,PI3K (family),PLAU	AGPAT3,ASS1,BCL2L1,BGN,BHMT,CDK5RAP3,CELA1,CKMT2,CNP,COL6A2,CPT1A,CREG1,EIF3A,FDXR,FHIT,FTL,G6PC,G6PD,GLA,IDE,Ighg2b,ISG15,KRT17,KRT6B,MAVS,MGLL,MOGS,MRPL45,MRPL47,MRPL55,MVP,PRDX1,PSMA1,PSMD13,RAB5A,RACK1,RPL12,RPL23,RPLP0,RPS16,RPS18,SCD,SKP2,SND1,TALDO1,THRSP,TKT,Tpm1,TPT1,TXN2,TXNRD1,VIM,YBX1	53 (15)	15				CDH1,NFE2L2	FOS,PTGS2
GALR2	G-protein coupled receptor		3		1.116	1.79e-07	AMPK,Ap1,BTK,CFTR,CTNNB1,EGF,EGFR,Focal adhesion kinase,FOXO1,FOXO3,G protein,G protein alphai,GAB1,GALR2,GLI1,GLI2,GNA11,GNA12,INSR,MAP2K3,MAPK1,MTOR,NFE2L2,NFkB (complex),RAC1,RAS,SLC6A3,SRF,TEC/BTK/ITK/TXK/BMX	ACOT2,AGPAT3,ANPEP,ARL1,ARSB,ATP5S,CDK5RAP3,CELA1,CNP,COL6A2,CREG1,CTNNA2,Cyp2c40 (includes others),EIF3A,EIF4E,FABP2,FADS2,FTL,G6PD,GLA,HNRNPK,HRAS,IDE,Igkv1-117,ISG15,KIAA0391,KRT1,KRT18,KRT5,KRT6B,KRT72,KRT8,MAVS,MGLL,MOGS,MRPL45,MRPL47,MRPL55,Mup1 (includes others),NCL,NUTF2,PECR,PPT2,PRG2,PSAP,PSMA1,PSMD13,RACK1,RALA,RPL12,RPLP0,RPS16,RPS18,RPS6,SCD,SND1,SRSF1,SUOX,TALDO1,TKT,Tpm4,TXN2,TXNRD…	65 (29)	25				GNA12	CDKN1A
FAAH	enzyme	-1.46	1	Activated	2.646	1.9e-07	FAAH	RPL17,RPL5,RPL7,RPS18,RPS2,Rps3a1,RPS6	7 (1)	1	CFTR	ARN2508,FABP1,oleic acid		TRH	FOS
TFEB	transcription regulator		1	Activated	2.828	1.99e-07	TFEB	ARSA,ARSB,CTSA,GALNS,GLA,NEU1,PSAP,SCPEP1	8 (1)	1	genistein	sirolimus,TSC2		CDH1,CTSA,NAGLU	glycogen
pergolide	chemical drug		3		-1	2.42e-07	ADCY,ADORA2A,Akt,AKT1,AMPK,Creb,CREB1,CYP2D6,CYP3A4,DRD2,DRD3,EGFR,FOS,HTR1A,HTR1B,HTR2A,HTR2B,JAK2,NOS2,pergolide,PRL,PTK2,RAF1,RELA,SLC6A3,STAT3,STK11,tamoxifen,TRPM8	ACP6,ACY3,AK2,Ces1b/Ces1c,COL6A2,CTSA,CTSC,EIF3A,EIF4E,FADS2,FARS2,FHIT,G6PD,GAA,GLA,GPX4,HNRNPK,IDE,Igkv1-117,KRT1,KRT5,KRT72,KRT8,LYZ,MGLL,NCL,NUTF2,PDK2,PDXK,PEX1,PEX11A,PLIN3,PRCP,PSAP,RPL9,RPLP0,RPS18,RPS2,RPS24,RPS6,RPS7,RPS9,RPSA,SARDH,SCD,SCO2,SERPINF1,SET,SKP2,SNAP23,SND1,SNRPD1,SRSF1,STARD10,SYNJ2,TALDO1,TANK,TECR,TKT,Tpm4,TPT1,TXNRD1,UBE2L3,YBX1	64 (29)	19					TP53
COL4A4	other		3	Inhibited	-2.25	4.29e-07	Akt,AMPK,ATF6,COL4A4,Creb,DDIT3,EIF2AK3,EIF2S1,ERN1,FOXO1,FOXO3,IFNAR1,Jnk,MTOR,NFE2L2,NFkB (complex),P38 MAPK,PPP3CA,STAT1,STK11,TSC2	ACP6,ACSS2,ACY3,AGPAT3,AK2,ARG1,ASS1,BGN,BHMT,CDK5RAP3,CELA1,CNP,CPT1A,DPP7,EIF3A,FDXR,FHIT,FTL,G6PC,G6PD,HDLBP,HRAS,IDE,ISG15,ITGAV,KRT1,KRT17,KRT18,KRT8,MAVS,MGLL,MOGS,MRPL45,MRPL47,MRPL55,NEU1,OAT,PLIN3,PLSCR1,PRDX1,PRELP,PSMA1,PSMD13,RAB5A,RACK1,RPL12,RPL23,RPLP0,RPS16,RPS18,SARDH,SCD,SCPEP1,SMPDL3A,SND1,SRSF1,SRSF6,STARD10,TALDO1,TKT,Tpm1,TXN2,TXNRD1,YBX1	64 (21)	19	COL4A3
HOXA7	transcription regulator		3	Inhibited	-3.046	4.36e-07	Akt,AKT1,CDK2,CGA,cyclic AMP,EGFR,ERK1/2,HOXA7,HRAS,KRT10,MAPK12,MTOR,NFKBIA,p70 S6k,Pkc(s),RAF1,RB1,TGM1,TSH,UCP1	ACOT2,AK2,AKAP1,ASS1,BHMT,Ces1b/Ces1c,CNP,COL6A2,COPB2,CTSH,CTSZ,EEF1A1,EIF3A,EIF4E,FHIT,G6PD,GARS,GM2A,GPX4,GUSB,HRAS,IGKC,ITGAV,KRT17,KRT5,KRT8,MGLL,MRPL55,NCL,NLN,NUTF2,OAT,PCYT1A,PEX11A,PLD3,PRDX1,RPL12,RPL23,RPL27A,RPL30,RPL8,RPS10,RPS3,RPS6,RPSA,SCD,SERPINF1,SKP2,SNRPD1,SPTBN1,SRSF1,THRSP,Tpm1,Tpm4,UBE2L3,VIM,VNN1	57 (20)	18				CDH1,EDNRA,KCNA3,TSH
GCG	other		2		-1.5	5.47e-07	Akt,AMPK,Ap1,Creb,ERK1/2,FOS,FOXO1,GCG,Ins1,Insulin,MAP2K3,MAP2K6,MAPK1,MAPK14,MTOR,P38 MAPK,p70 S6k,PDX1,PDZK1,PI3K (complex),STK11	ACOT12,ACP6,ACY3,AK2,ANPEP,ARL1,ARSB,BCL2L1,BGN,BHMT,CDK5RAP3,CKMT2,CNP,CPT1A,CTNNA2,ETNPPL,FADS2,FARS2,FDXR,FHIT,FTL,G6PC,G6PD,GUSB,IDE,KRT1,KRT17,KRT18,KRT6B,KRT8,MAVS,MRPL45,MRPL47,MRPL55,MVP,OAT,PDK2,PLSCR1,PPT2,PRDX1,RAB5A,RPL12,RPL23,RPL9,RPLP0,RPS16,RPS24,RPS7,RPS9,SARDH,SCD,SKP2,SLC7A2,SNAP23,SND1,SRSF3,STARD10,SUOX,TALDO1,TKT,Tpm1,TXNRD1,VNN1,YBX1	64 (21)	21	palmitic acid			ADIPOQ,AMPK,cAMP-dependent protein kinase,Creb,EIF4B,FOS,IGF1R,MAP2K6,PAX4,PRKACA	FASN,SREBF1,SREBF2
thioproperazine	chemical drug		3		1.291	5.98e-07	ADORA2A,ADRA1A,ADRA1B,Akt,AKT1,Creb,CREB1,cyclic AMP,DRD2,EGFR,ERK,ERK1/2,HTR1A,HTR2A,JAK2,MAPK1,MAPK14,p70 S6k,PI3K (complex),PRL,PTK2,RAF1,SLC6A3,TGM2,thioproperazine	ACSS2,ACY3,ANPEP,ARSB,ASS1,BGN,BHMT,Ces1b/Ces1c,COL6A2,CTSA,EEF1A1,EIF4E,FHIT,G6PD,GAA,GLA,GM2A,HNRNPK,IDE,KRT1,KRT17,KRT18,KRT5,KRT72,MGLL,MVP,NCL,NLN,NUTF2,OAT,PDK2,PDXK,PEX11A,PLIN3,PPT2,PRCP,PRDX1,PSAP,RALA,RPL23,RPS2,RPSA,SCD,SERPINF1,SET,SKP2,SLC7A2,SND1,SNRPD1,SPTBN1,SRSF1,SUOX,SYNJ2,TECR,THRSP,Tpm1,Tpm4,TPT1,UBE2L3,VNN1	60 (25)	20
Cul3-Roc1	complex		3		-0.258	6.09e-07	26s Proteasome,BRCA1,CCNE1,Creb,CUL3,Cul3-Roc1,GMNN,IRS1,NFE2L2,NFkB (complex),NFKB1,NFKBIA,P38 MAPK,Pkc(s),PML,PRKCI,RBPJ,RBX1,RELA,STAT3,TET1,TET2,VHL	ACY3,AGPAT3,AK2,ARG1,ASS1,BCL2L1,BHMT,CELA1,CENPE,COPB2,CPT1A,CREG1,CTSA,CTSZ,CYP2S1,FABP2,FDXR,FTL,G6PC,G6PD,GLA,GM2A,IDE,KRT1,KRT18,KRT8,MAVS,MGLL,MOGS,OAT,PCYT1A,PEX1,PLD3,PLIN3,PLSCR1,PRDX1,PSAP,PSMA1,PSMD13,RAB5A,RACK1,RPL27A,RPL8,RPLP0,RPS16,RPS18,RPS2,RPS6,RPSA,SCD,SCO2,SKP2,SPTBN1,TALDO1,TANK,THRSP,TKT,Tpm1,TXN2,TXNRD1	60 (23)	20					NFE2L2
PHLPP2	enzyme		2	Activated	3.212	7.23e-07	Akt,AKT1,AKT3,IKBKG,NFE2L2,PHLPP2,PRKCA,PRKCB,RPS6KB1	AGPAT3,ASS1,BCL2L1,BHMT,CELA1,Ces1b/Ces1c,CPT1A,CREG1,CTSZ,FHIT,FTL,G6PC,G6PD,GM2A,IDE,MGLL,MOGS,PEX11A,PLD3,PRDX1,PSMA1,PSMD13,RACK1,RPLP0,RPS16,RPS6,SERPINF1,TALDO1,THRSP,TKT,TOMM70,Tpm1,TXNRD1,UBE2L3,VIM	35 (9)	8		TSC2			AKT3,NFE2L2
GNA12	enzyme		2		1.753	9.75e-07	AKT1,Ap1,BTK,CTNNB1,Focal adhesion kinase,FOXO1,FOXO3,GAB1,GNA12,Jnk,MAP2K3,MAP2K4,NFE2L2,NFkB (complex),P38 MAPK,PI3K (complex),PRKCD,RAC1,SRF	AGPAT3,ARG1,ARL1,ASS1,BHMT,CDK5RAP3,CELA1,Ces1b/Ces1c,CKMT2,CPT1A,CREG1,FDXR,FHIT,FTL,G6PC,G6PD,GLA,HRAS,IDE,Igkv1-117,ISG15,KRT17,KRT18,KRT6B,KRT8,MAVS,MGLL,MOGS,MRPL45,MRPL47,MRPL55,Mup1 (includes others),OAT,PEX11A,PLSCR1,PRDX1,PRG2,PSMA1,PSMD13,RAB5A,RACK1,RPL23,RPLP0,RPS16,SERPINF1,SRSF1,TALDO1,THRSP,TKT,Tpm4,TXN2,TXNRD1,UBE2L3,VIM,YBX1	55 (19)	19	GALR2,PRL			Focal adhesion kinase,GAB1,MYC,PIK3CB,RAC1,RASA1,RDX,Sos	GSTA1,NFE2L2
ciprofibrate	chemical drug		1		-0.832	1.11e-06	ciprofibrate	ACOT2,CPOX,G6PC,HPD,KRT8,MGLL,Mup1 (includes others),Nat8f2,OAT,PEX11A,PLSCR1,RPL12,SCD	13 (1)	1				8-oxo-7-hydrodeoxyguanosine,ACOX1,CAT,EHHADH,HSD17B4,Kap,NFKBIA,PPARA,RBM3	D-glucose,Ins1,Mup1 (includes others)
BAY1082439	chemical drug		3		1.769	1.34e-06	Akt,AKT1,AURKB,BAY1082439,CSF2RB,ERK1/2,Focal adhesion kinase,FOXO1,FOXO3,GAB1,HRAS,MTOR,NFkB (complex),PI3K (complex),PI3K (family),PIK3CA,PIK3CB,PIK3R1,PRKAA,RPS6KB1	ARG1,ASS1,BHMT,CDK5RAP3,Ces1b/Ces1c,CKMT2,CNP,COPB2,CPT1A,EIF3A,FDXR,FHIT,G6PD,GLA,GUSB,HRAS,IGKC,ISG15,ITGAV,KRT17,KRT18,KRT8,MAVS,MRPL45,MRPL47,MRPL55,NLN,PCYT1A,PEX11A,RPL12,RPL23,RPL27A,RPL30,RPS10,RPS18,RPS3,RPS6,SERPINF1,SNAP23,SND1,Tpm4,TXN2,UBE2L3,VIM,VNN1,YBX1	46 (20)	18					PIK3CB
PIK3CB	kinase		2	Inhibited	-2	1.39e-06	Akt,AKT1,AURKB,GAB1,HRAS,MTOR,p70 S6k,PI3K (complex),PI3K (family),PIK3CB	ARG1,ASS1,BCL2L1,Ces1b/Ces1c,CNP,COPB2,CPT1A,EEF1A1,EIF3A,FDXR,FHIT,G6PC,G6PD,GUSB,HRAS,IGKC,ISG15,KRT18,NLN,PCYT1A,PEX11A,RPL12,RPL23,RPL27A,RPL30,RPS10,RPS18,RPS3,RPS6,SCD,SERPINF1,SKP2,SND1,Tpm4,UBE2L3,VIM	36 (10)	9	Cdc42,D-glucose,gemfibrozil,GIP,GNA12,PML,RAC1,TCR,troglitazone	BAY1082439,dactolisib,FMR1,imatinib,TP53		GAB1,HRAS,MAPK3
cisapride	chemical drug		3		-0.13	1.4e-06	ADCY,ADORA2A,ADRA1A,AKT1,AMPK,cisapride,Creb,CREB1,cyclic AMP,CYP2D6,DRD2,EGFR,HTR2B,MAPK1,NOS2,p70 S6k,PI3K (complex),PPP1R1B,PRL,PTK2,RAF1,RELA,SLC6A3,STK11,tamoxifen,TRPM8	ACP6,ACY3,AK2,ANPEP,ARSB,ASS1,Ces1b/Ces1c,COL6A2,CTSA,CTSC,EEF1A1,EIF3A,EIF4E,FADS2,GAA,GLA,GPX4,HNRNPK,IDE,Igkv1-117,KRT1,KRT17,KRT5,KRT72,MGLL,MVP,NCL,NUTF2,OAT,PDK2,PDXK,PEX11A,PLIN3,PPT2,PRCP,PSAP,RPL23,RPS2,RPSA,SARDH,SCO2,SERPINF1,SKP2,SND1,SNRPD1,SRSF1,SRSF3,STARD10,SUOX,SYNJ2,TALDO1,TANK,TECR,THRSP,Tpm4,TPT1,TXNRD1,UBE2L3,YBX1	59 (26)	20
IL15	cytokine		2		0.855	1.48e-06	Akt,AKT1,CD44,ERK,ERK1/2,FOS,FOXO3,IL15,IRS1,IRS2,MAPK1,MAPK8,NFkB (complex),NFKBIA,P38 MAPK,p70 S6k,RELA,SHC1,STAT3,STAT4,STAT5A,STAT5B,STAT6,TERT,VAV1	ACP6,AK2,ANPEP,ARSB,ASS1,BCL2L1,BGN,BHMT,CELA1,Ces1b/Ces1c,CKMT2,CPOX,CPT1A,CTNNA2,CTSZ,CXADR,DARS2,EEF1A1,EIF4E,FARS2,FDXR,FHIT,FTL,G6PC,G6PD,GARS,GLA,GLB1,GM2A,GYS2,Ighg2b,ITGAV,KRT5,KRT6B,KRT8,LYZ,MVP,PEX1,PEX11A,PLD3,PPT2,RAB5A,RALA,RPL27A,RPL8,RPL9,RPLP0,RPS18,RPS2,RPS24,RPS6,RPS7,RPS9,RPSA,SCO2,SERPINF1,SET,SMPDL3A,SNAP23,SPTBN1,SUOX,TALDO1,TKT,TXN2,UBE2L3,VNN1,YBX1	67 (25)	25	AGT	Tcrd		CCL11,CCND1,GPI,IL21R,IRS2,MAPK3,MYC,PTK2,RBX1,XBP1	CDH1,CDKN1A,FOS,IGF1R,PIK3R2
dehydroepiandrosterone sulfate	chemical - endogenous mammalian		2		-1.27	1.64e-06	Akt,AMPK,Creb,dehydroepiandrosterone sulfate,NFkB (complex),NR1I2,P38 MAPK,PPARA,SRC,TNF	ABCD2,ACOT2,ACSS2,ACY3,AK2,ANPEP,ARG1,ASS1,BGN,BHMT,C8A,CPOX,CTSC,CTSZ,ELOVL5,FADS2,FDXR,FHIT,G6PC,G6PD,GLA,GM2A,GPX4,GUSB,HPD,IDE,IGKC,ISG15,ITGAV,KRT1,KRT17,KRT18,KRT8,Mup1 (includes others),MVP,Nat8f2,OAT,PCYT1A,PEX11A,PLD3,PLIN3,PLSCR1,RAB5A,RPS13,RPS3,RPSA,SARDH,SCD,SCO2,SGPL1,SLC14A2,SLC7A2,SMPDL3A,SND1,TALDO1,THRSP,TPT1,TXN2,TXNRD1,VIM,VNN1,YBX1	62 (10)	9				ACOX1,Creb,Insulin,PPARA	AMPK,CCND1
Ngf	group		2	Inhibited	-2.25	1.66e-06	Akt,Ap1,APP,CD40,CHGA,ERK,ERK1/2,FOS,HINT1,MAP3K1,MAPK1,MAPK8,NFE2L2,NFkB (complex),NFKB1,NGF,Ngf,NR4A1,P38 MAPK,PI3K (complex),RAC1,RAS,VEGFA	AGPAT3,ANPEP,ARSB,ASS1,BGN,BHMT,CELA1,COL6A2,CPT1A,CREG1,CTNNA2,EEF1A1,ELOVL5,FADS2,FARS2,FDXR,FHIT,FTL,G6PC,G6PD,GLA,IDE,Ighg2b,ISG15,ITGAV,KRT18,KRT6B,KRT8,MAN2B2,MGLL,MOGS,PDK2,PLSCR1,PPT2,PRDX1,PSMA1,PSMD13,RAB5A,RACK1,RPL23,RPL9,RPLP0,RPS16,RPS18,RPS24,RPS7,RPS9,SCO2,SERPINF1,SET,SLC25A4,SNAP23,SPTBN1,SUOX,TALDO1,TANK,THRSP,TKT,TOMM70,Tpm1,TRIM41,TXN2,TXNRD1,VNN1	64 (23)	22	EPO			FOS,HINT1,MAPK3,NFE2L2,PLAUR,RAC1,RAS
LPCAT1	enzyme		3	Activated	3.556	1.76e-06	Akt,AMPK,DDIT3,EIF2AK3,EIF2S1,ERN1,FOXO1,FOXO3,IFNAR1,Jnk,LPCAT1,MAPK8,NFE2L2,NFkB (complex),P38 MAPK,PPP3CA,STAT1,STK11,TSC2,XBP1	ACP6,ACSS2,AGPAT3,AK2,ARG1,ASS1,BGN,BHMT,CDK5RAP3,CELA1,COPB1,COPB2,DPP7,EIF3A,FDXR,FHIT,FTL,G6PD,HDLBP,HRAS,IDE,ITGAV,KRT17,KRT18,KRT8,MAVS,MGLL,MOGS,MRPL45,MRPL47,MRPL55,MVP,NEU1,OAT,PCYT1A,PLSCR1,PRDX1,PRELP,PSMA1,PSMD13,RAB5A,RACK1,RPLP0,RPS16,Rrbp1,SARDH,SCD,SCPEP1,SEC61G,SEC63,SMPDL3A,SRSF1,SRSF6,STARD10,STARD5,TALDO1,TKT,Tpm1,TRAM1,TXN2,TXNRD1,YBX1	62 (20)	18					DDIT3
PARP16	enzyme		3	Inhibited	-3.556	1.76e-06	Akt,AMPK,DDIT3,EIF2AK3,EIF2S1,ERN1,FOXO1,FOXO3,IFNAR1,Jnk,MAPK8,NFE2L2,NFkB (complex),P38 MAPK,PARP16,PPP3CA,STAT1,STK11,TSC2,XBP1	ACP6,ACSS2,AGPAT3,AK2,ARG1,ASS1,BGN,BHMT,CDK5RAP3,CELA1,COPB1,COPB2,DPP7,EIF3A,FDXR,FHIT,FTL,G6PD,HDLBP,HRAS,IDE,ITGAV,KRT17,KRT18,KRT8,MAVS,MGLL,MOGS,MRPL45,MRPL47,MRPL55,MVP,NEU1,OAT,PCYT1A,PLSCR1,PRDX1,PRELP,PSMA1,PSMD13,RAB5A,RACK1,RPLP0,RPS16,Rrbp1,SARDH,SCD,SCPEP1,SEC61G,SEC63,SMPDL3A,SRSF1,SRSF6,STARD10,STARD5,TALDO1,TKT,Tpm1,TRAM1,TXN2,TXNRD1,YBX1	62 (20)	18
LGALS3	other		2		0.849	1.77e-06	Akt,AKT1,CAV1,CCND1,EGFR,ERK1/2,KRAS,LGALS3,MAPK1,PI3K (complex),PTK2,RAF1,RAS,RELA	ARSB,ASS1,BCLAF1,BGN,BHMT,Ces1b/Ces1c,COL6A2,CPT1A,CTNNA2,CTSH,CXADR,EEF1A1,EIF4E,EIF5,FHIT,G6PC,ITGAV,KRT1,KRT17,MGLL,MTRR,MVP,NCL,NUTF2,PCYT1A,PEX11A,PLSCR1,PPT2,PRDX1,RALA,RPL10,RPL13,RPL23,RPL27A,RPS2,RPS6,RPSA,SCO2,SERPINF1,SKP2,SNRPD1,SRSF1,SUOX,TALDO1,TANK,TMEM109,Tpm1,UBE2L3,VNN1,VPS35	50 (14)	14	FOS,nitrofurantoin,phenacetin,pirinixic acid	ACOX1,MDM4,sirolimus,TO-901317,TP53,TSC2		ADIPOQ,CCND1,MUC1,MYC,PTK2,RAC1,RAS	D-glucose
N-nitro-L-arginine methyl ester	chemical drug		2		0.277	1.96e-06	Akt,AKT1,AKT2,ERK,MAPK1,MAPK14,N-nitro-L-arginine methyl ester,NFE2L2,NFkB (complex),NOS2,P38 MAPK,p70 S6k,RAF1,Srebp	ACSS2,AGPAT3,ANPEP,ARSB,BCL2L1,BGN,BHMT,CELA1,Ces1b/Ces1c,CPT1A,CREG1,CTNNA2,CTSC,CTSH,EEF1A1,FDXR,FHIT,FTL,G6PC,G6PD,GLA,IDE,ISG15,ITGAV,KIAA0391,KRT18,KRT6B,MGLL,MOGS,MVP,PEX11A,PLSCR1,PPT2,PRDX1,PSMA1,PSMD13,RAB5A,RACK1,RPLP0,RPS16,RPS2,SCD,SERPINF1,SNRPD1,SPTBN1,SUOX,TALDO1,THRSP,Tpm1,TXNRD1,UBE2L3,VIM	52 (14)	14				D-glucose,NFKBIA,PTGS2	ADIPOQ,CCL11,citrulline,EPO,NFE2L2,Srebp,TSH
SRMS	kinase		3		1.604	2.33e-06	Akt,AKT1,DOK1,EGFR,ERK,ERK1/2,HIF1A,HRAS,IGF1R,MAPK1,Mek,Nfat (family),PTK6,RAF1,RAS,SRMS,STAT3,STAT4	ACP6,ANPEP,ARG1,ARSB,ASS1,ATP5S,BHMT,Ces1b/Ces1c,COL6A2,COPB2,CPT1A,CTNNA2,CTSH,EIF4E,FABP2,FHIT,G6PC,GUSB,HIST2H2AC,IGKC,ISG15,KRT17,KRT5,KRT6B,LYZ,MGLL,MVP,NCL,NLN,NUS1,NUTF2,PCYT1A,PECR,PEX1,PEX11A,PLSCR1,PPT2,PRDX1,RPL23,RPL27A,RPL30,RPS10,RPS2,RPS3,RPS6,SERPINF1,SKP2,SMPDL3A,SNRPD1,SPTBN1,SRSF1,SUOX,Tpm1,Tpm4,UBE2L3,VNN1	56 (18)	16				DOK1
methyl-beta-cyclodextrin	chemical drug		2		1.905	2.45e-06	Akt,AKT1,CD247,ERK,ERK1/2,FOXO1,HRAS,IRS1,MAPK1,methyl-beta-cyclodextrin,NFkB (complex),p70 S6k,PI3K (complex),PLG,RAC1,RAS,RELA,STAT3,ZAP70	ARG1,ARSB,ASS1,BCL2L1,BGN,BHMT,CDK5RAP3,Ces1b/Ces1c,CKMT2,COPB2,CPT1A,CTNNA2,CYP2S1,EEF1A1,FHIT,G6PC,G6PD,GLA,GUSB,IGKC,ISG15,KRT18,KRT6B,LYZ,MAVS,MRPL45,MRPL47,MRPL55,MVP,NLN,PCYT1A,PEX1,PEX11A,PLSCR1,PPT2,PRDX1,RAB5A,RALA,RPL23,RPL27A,RPL30,RPS10,RPS17,RPS3,RPS6,SCD,SCO2,SERPINF1,SPTBN1,SUOX,TANK,Tpm4,UBE2L3,VNN1	54 (19)	19				RAS	CCND1,HRAS,MYC,RAC1
miR-542-3p (miRNAs w/seed GUGACAG)	mature microRNA		1	Activated	2	2.74e-06	miR-542-3p (miRNAs w/seed GUGACAG)	RPL11,RPL22,RPS23,RPS28	4 (1)	1		HRAS,KRAS			PTGS2,TP53
ZBTB17	transcription regulator		3		0.525	2.78e-06	Akt,CHUK,ERK1/2,HNF4A,IKBKB,JAK2,MAP2K1,MAP3K1,MAP4K4,MAPK8,MAPK9,NFkB (complex),NFKB1,NFKBIA,P38 MAPK,Rar,RELA,SREBF1,STAT3,STAT5A,STAT5a/b,STAT5B,TICAM1,TRAF2,ZBTB17	ACSS2,AGPAT3,AK2,ANPEP,ASS1,BCL2L1,BGN,BHMT,CKMT2,CTSZ,CXADR,DHRS4,EIF4E,FABP2,FADS2,FDXR,FHIT,FMO3,G6PD,GLA,GLB1,GM2A,GUSB,GYS2,HPD,ITGAV,KRT5,LYZ,MAN2B2,MGLL,MVP,NCL,PCYT1A,PEX1,PEX11A,PEX19,PLD3,PSAP,RAB5A,RNASET2,RPL27A,RPL8,RPLP0,RPS18,RPS2,RPSA,SCO2,SERPINF1,SET,SLC25A4,SLC26A11,SLC7A2,SPTBN1,SRSF3,THRSP,TMEM97,VIM,VNN1	58 (25)	24		HUWE1,MYC
1,2-dithiol-3-thione	chemical reagent		1	Inhibited	-2.324	2.9e-06	1,2-dithiol-3-thione	AGPAT3,BHMT,CELA1,CREG1,IDE,MGLL,PRDX1,PSMA1,PSMD13,RACK1,RPLP0,RPS16,THRSP,Tpm1,TXNRD1	15 (1)	1				CLPTM1L,CUL1,DNAJC3,GSTA1,HSP90B1,NFE2L2,NQO1,RACK1,XBP1	FABP1,SREBF1
paliperidone palmitate	chemical drug		3		0.816	2.93e-06	ADORA2A,ADRA1A,ADRA1B,ADRA1D,ADRA2A,ADRA2B,ADRA2C,Akt,AKT1,AMPK,CREB1,DRD2,EGFR,ERK,ERK1/2,HRH1,HTR2A,JAK2,MAPK14,Nfat (family),P38 MAPK,p70 S6k,paliperidone palmitate,PI3K (complex),PRL,PTK2,RAF1,RAS,SLC6A3,TGM2	ACSS2,BGN,BHMT,Ces1b/Ces1c,COL6A2,CTSA,EEF1A1,EIF4E,FDXR,FHIT,G6PD,GAA,GLA,GM2A,HNRNPK,IDE,KRT18,KRT5,KRT72,MGLL,NCL,NLN,NUS1,NUTF2,OAT,PDK2,PDXK,PEX11A,PRCP,PRDX1,PSAP,RAB5A,RALA,RPL23,RPS2,RPSA,SCD,SERPINF1,SET,SKP2,SLC7A2,SND1,SNRPD1,SPTBN1,SRSF1,SYNJ2,TECR,THRSP,Tpm1,Tpm4,TPT1,UBE2L3,VNN1,YBX1	54 (30)	21
CDK4/6	group		1	Activated	2.333	3.11e-06	CDK4/6	BCLAF1,EIF5,KRT1,PCYT1A,RPL10,RPL13,RPL27A,RPS6,TALDO1	9 (1)	1	MYC	arsenite		CCND1	ZNF148
paliperidone	chemical drug		3		0.816	3.14e-06	ADORA2A,ADRA1A,ADRA1B,ADRA1D,ADRA2A,ADRA2B,ADRA2C,Akt,AKT1,AMPK,CREB1,DRD2,DRD3,EGFR,ERK,ERK1/2,HRH1,HTR2A,JAK2,MAPK14,Nfat (family),P38 MAPK,p70 S6k,paliperidone,PI3K (complex),PRL,PTK2,RAF1,RAS,SLC6A3,TGM2	ACSS2,BGN,BHMT,Ces1b/Ces1c,COL6A2,CTSA,EEF1A1,EIF4E,FDXR,FHIT,G6PD,GAA,GLA,GM2A,HNRNPK,IDE,KRT18,KRT5,KRT72,MGLL,NCL,NLN,NUS1,NUTF2,OAT,PDK2,PDXK,PEX11A,PRCP,PRDX1,PSAP,RAB5A,RALA,RPL23,RPS2,RPSA,SCD,SERPINF1,SET,SKP2,SLC7A2,SND1,SNRPD1,SPTBN1,SRSF1,SYNJ2,TECR,THRSP,Tpm1,Tpm4,TPT1,UBE2L3,VNN1,YBX1	54 (31)	21
quercitrin	chemical - endogenous non-mammalian		2	Inhibited	-2.985	3.25e-06	NFE2L2,quercitrin,TOP1	AGPAT3,BCL2L1,BHMT,CELA1,CREG1,FTL,G6PD,GLB1,IDE,MGLL,MOGS,PRDX1,PSMA1,PSMD13,RACK1,RPLP0,RPS16,TALDO1,THRSP,TKT,Tpm1,TXNRD1	22 (3)	2				NFE2L2
cocaine	chemical drug		2		-0.832	3.47e-06	Akt,AKT1,Ap1,BCL2,CDK5,cocaine,Creb,CREB1,DUSP1,ERK,ERK1/2,FOS,MAPK9,P38 MAPK,SIK1/SIK1B	ACY3,ARG1,ASS1,BGN,BHMT,Ces1b/Ces1c,CPT1A,CTNNA2,CTSH,DDB1,EIF4E,FARS2,FDXR,FHIT,G6PC,GAA,GLA,GLB1,Ighg2b,KCNMA1,KRT1,KRT18,KRT6B,KRT8,MGLL,NCL,PDXK,PEX11A,PITPNA,PLIN3,PRCP,PSAP,RAB5A,RALA,RPL9,RPLP0,RPS18,RPS24,RPS6,RPS7,RPS9,SCD,SERPINF1,SNAP23,SPTBN1,SYNJ2,THRSP,Tpm1,Tpm4,TPT1,UBE2L3,VNN1	52 (15)	15				CDK5,Creb,FOS,GADD45B,IRS2,MAPK3,mir-132,mir-7,PPP1R1B,PRKACA,SIK1/SIK1B	Ldh (complex),MAP2K6,PRL
RBM3	other		3	Activated	2.324	3.75e-06	Akt,AMPK,ATF4,DDIT3,EIF2A,EIF2AK3,EIF2S1,ERN1,FOXO1,FOXO3,Jnk,NFE2L2,NFkB (complex),P38 MAPK,PPARG,PPP3CA,RBM3,Srebp,STAT1,STK11,TSC2	ACP6,ACSS2,AGPAT3,AK2,ASS1,BGN,BHMT,CDK5RAP3,CELA1,CPOX,DPP7,EIF3A,FABP2,FDXR,FHIT,FTL,G6PD,GARS,HDLBP,HRAS,IDE,ISG15,ITGAV,KRT17,KRT18,KRT8,MAVS,MGLL,MOGS,MRPL45,MRPL47,MRPL55,NEU1,OAT,PEX11A,PLSCR1,PRDX1,PRELP,PSMA1,PSMD13,RAB5A,RACK1,RPLP0,RPS16,RPSA,SARDH,SCD,SCPEP1,SERPINF1,SMPDL3A,SRSF1,SRSF6,STARD10,TALDO1,TKT,Tpm1,TXN2,TXNRD1,VNN1,YBX1	60 (21)	18	ciprofibrate,TP53	ACOX1			DDIT3
TSH	complex		2	Inhibited	-3.641	3.77e-06	Akt,AKT1,CDK2,CGA,cyclic AMP,EGFR,HRAS,MAPK8,MTOR,NFKBIA,p70 S6k,Pkc(s),RAF1,RB1,TSH,UCP1	ACOT2,AK2,AKAP1,ASS1,Ces1b/Ces1c,CNP,COL6A2,COPB2,CTSH,CTSZ,EEF1A1,EIF3A,EIF4E,FHIT,G6PD,GARS,GM2A,GPX4,GUSB,HRAS,IGKC,ITGAV,KRT17,KRT5,KRT8,MGLL,MRPL55,MVP,NCL,NLN,NUTF2,OAT,PCYT1A,PEX11A,PLD3,RPL12,RPL23,RPL27A,RPL30,RPL8,RPS10,RPS3,RPS6,RPSA,SCD,SERPINF1,SKP2,SNRPD1,SPTBN1,SRSF1,THRSP,Tpm1,Tpm4,UBE2L3,VIM	55 (16)	16	AGT,arachidonic acid,HOXA7,TRH	L-triiodothyronine,N-nitro-L-arginine methyl ester		cAMP-dependent protein kinase,CCND1,CDKN1A,FOS,HRAS,KRT14,MYC	NFKBIA,RAP1GAP
iodoacetamide	chemical reagent		2	Inhibited	-2.711	3.94e-06	FASN,iodoacetamide,NFE2L2	AGPAT3,BHMT,CELA1,CREG1,FTL,G6PD,IDE,MGLL,MOGS,PRDX1,PSMA1,PSMD13,RACK1,RPLP0,RPS16,SCD,SKP2,TALDO1,THRSP,TKT,Tpm1,TXNRD1,VIM	23 (3)	2				NFE2L2	FASN
ZBED1	enzyme		1		-1.732	4.84e-06	ZBED1	RPL10A,RPL12,RPS6	3 (1)	1
nitrofurantoin	chemical drug		1		-1.941	5.09e-06	nitrofurantoin	ASS1,BCL2L1,CPT1A,EEF1A1,EIF4E,PCYT1A,PRDX1,RPL13,RPL13A,RPL27,RPL6,RPS8,RPS9	13 (1)	1	amino acids			APEX1,CCND1,DDIT3,HSPA5,LGALS3,NFKBIA,NQO1,SPP1,TP53	ACOX1,AMD1,CAT,EHHADH,FABP1,HSD17B4,MAPK3,MYC
NFE2L2	transcription regulator		1	Inhibited	-2.837	5.89e-06	NFE2L2	AGPAT3,BCL2L1,BHMT,CELA1,CREG1,FTL,G6PD,IDE,MGLL,MOGS,PRDX1,PSMA1,PSMD13,RACK1,RPLP0,RPS16,TALDO1,THRSP,TKT,Tpm1,TXNRD1	21 (1)	1	1,2-dithiol-3-thione,15-deoxy-delta-12,14 -PGJ 2,arachidonic acid,arsenic,arsenite,bardoxolone methyl,benzyl isothiocyanate,benzyloxycarbonyl-Leu-Leu-Leu aldehyde,cadmium,CDKN1A,CXCL14,docosahexaenoic acid,epigallocatechin-gallate,genistein,iodoacetamide,KRAS,MAP3K5,MAPK3,MYC,Ngf,PPARA,PRKAA1,quercitrin	ACOX1,Cul3-Roc1,D-glucose,FOS,GNA12,GRB14,MAP2K6,MAPK11,MAPK12,N-nitro-L-arginine methyl ester,palmitic acid,PHLPP2,PML		CAT,CDH1,CLPTM1L,CUL1,DNAJC3,GSTA1,HSP90B1,MAFF,NQO1,RACK1,XBP1	8-oxo-7-hydrodeoxyguanosine,Aldose Reductase,Creb,FABP1,Ikb,Ldh (complex),MST1R,PTGS2,SREBF1,TP53
PTPN2	phosphatase		2		1.089	6.07e-06	Akt,AKT1,CAV1,CDK2,CSF1R,EGFR,EIF2S1,ERK,FOS,IKBKB,INSR,MAP3K1,NFkB (complex),PTPN2,RB1,STAT3,Stat3-Stat3,STAT5A,STAT6	ACOT2,ASS1,ATP5S,BGN,Ces1b/Ces1c,CKMT2,COL6A2,CPOX,CPT1A,CTSZ,EIF4E,FARS2,FHIT,FTL,GLA,GM2A,GYS2,HRAS,IDE,Ighg2b,ITGAV,KIAA0391,KRT5,KRT6B,LYZ,MAN2B2,MRPL55,NCL,NUTF2,PCYT1A,PECR,PEX1,PEX11A,PLD3,PLSCR1,PRDX1,RALA,RPL9,RPLP0,RPS18,RPS24,RPS6,RPS7,RPS9,SERPINF1,SKP2,SNAP23,SPTBN1,SRSF1,TANK,Tpm1,TXN2,UBE2L3,VIM	54 (19)	18	CSF2RB	palmitic acid		CCND1,NFKBIB	FOS
RASA1	transporter		2		0.649	7.49e-06	Akt,AKT1,AURKB,ERK,ERK1/2,HRAS,MAPK1,PI3K (complex),RAS,RASA1	ANPEP,ARSB,ASS1,BGN,BHMT,Ces1b/Ces1c,COPB2,CPT1A,CTNNA2,FDXR,FHIT,G6PC,G6PD,GUSB,IGKC,ISG15,ITGAV,KRT17,KRT18,MVP,NLN,PCYT1A,PEX11A,PLSCR1,PPT2,PRDX1,RPL23,RPL27A,RPL30,RPS10,RPS3,RPS6,SERPINF1,SPTBN1,SUOX,Tpm4,UBE2L3,VNN1	38 (10)	9	GNA12,Ins1,Insulin,TCR	DOK1,mir-132,mir-144,mir-451		FOS	HRAS,RAS
droperidol	chemical drug		3		0.283	7.68e-06	ADORA2A,ADRA1A,Akt,AKT1,CREB1,DRD2,droperidol,EGFR,ERK,ERK1/2,MAPK1,p70 S6k,PI3K (complex),PPP1R1B,PRKACA,PRL,PTK2,RAF1,SLC6A3	ANPEP,ARSB,ASS1,BGN,BHMT,Ces1b/Ces1c,COL6A2,CTSA,EEF1A1,EIF4E,FHIT,G6PC,G6PD,GAA,GLA,HNRNPK,IDE,KRT17,KRT18,KRT5,KRT72,MGLL,MVP,NCL,NUTF2,PDK2,PDXK,PEX11A,PLSCR1,PPT2,PRCP,PSAP,RPL23,RPS2,RPSA,SCD,SERPINF1,SKP2,SND1,SNRPD1,SPTBN1,SRSF1,SRSF3,SUOX,SYNJ2,TECR,Tpm4,TPT1,UBE2L3,VNN1	50 (19)	16
TBC1D7	other		2	Inhibited	-2.111	8.15e-06	TBC1D7,TSC1,TSC2	ACSS2,CREG1,DPP7,GLA,NEU1,PRELP,RPS6,SCD,SCPEP1,SMPDL3A,THRSP	11 (3)	2				TSC2
CARHSP1	transcription regulator		2		1.606	9.55e-06	CARHSP1,PPARA	ABCD2,ACOT2,ACSS2,ARG1,ASS1,BCL2L1,C8A,CPT1A,ELOVL5,FADS2,G6PC,G6PD,HPD,Mup1 (includes others),PEX11A,SARDH,SCD,TALDO1,VNN1	19 (2)	2		sirolimus			PPARA
EHHADH	enzyme	-1.294	2		-0.229	9.55e-06	EHHADH,PPARA	ABCD2,ACOT2,ACSS2,ARG1,ASS1,BCL2L1,C8A,CPT1A,ELOVL5,FADS2,G6PD,HPD,MGLL,Mup1 (includes others),PEX11A,SARDH,SCD,TALDO1,VNN1	19 (2)	2	ciprofibrate,gemfibrozil,pirinixic acid,SCAP,SREBF1	ELOVL5,Ins1,L-triiodothyronine,methapyrilene,nitrofurantoin			FASN
TFAP2A	transcription regulator		1		1.414	9.67e-06	TFAP2A	BCL2L1,KRT5,PRDX1,PSAP,RPL6,RPL7,RPLP0,RPS5	8 (1)	1	NR2F2			CDKN1A,KRT14	BOK,PLAUR
Trk Receptor	group		2		-1.915	1.06e-05	Akt,HRAS,Jnk,KRAS,NTRK1,PI3K (complex),Rap,RAS,RASGRF1,Shc,Trk Receptor	ANPEP,BCL2L1,BGN,COPB2,CPT1A,CXADR,EEF1A1,EIF5,FHIT,G6PD,GUSB,HRAS,IGKC,ISG15,KRT18,MTRR,MVP,NLN,PCYT1A,PLSCR1,PRDX1,RPL23,RPL27A,RPL30,RPS10,RPS3,RPS6,RPSA,TMEM109,Tpm1,Tpm4,VIM,VPS35	33 (11)	10				HRAS,KRAS,Rap,RAS
TSC2	other		1	Inhibited	-2.53	1.11e-05	TSC2	ACSS2,CREG1,DPP7,GLA,NEU1,PRELP,SCD,SCPEP1,SMPDL3A,THRSP	10 (1)	1	sirolimus,TBC1D7,TP53	amino acids,AMPK,CCND1,D-glucose,FMR1,Insulin,PRKAA,PRKAA1,PTK2,RAS		Cdc42,IRS2,RAC1,Rap	DDIT3,FOS,HSPA5,LGALS3,PHLPP2,TFEB
TEF	transcription regulator		2		-1.606	1.26e-05	PPARA,TEF	ABCD2,ACOT2,ACSS2,ARG1,ASS1,BCL2L1,C8A,CPT1A,ELOVL5,FADS2,G6PD,HPD,Mup1 (includes others),PDXK,PEX11A,SARDH,SCD,TALDO1,VNN1	19 (2)	2				PPARA
gamma-tocotrienol	chemical drug		2	Activated	3.569	1.31e-05	AMPK,CAT,gamma-tocotrienol,Jnk,NFkB (complex),NFKBIA,PPARA,SREBF2	ABCD2,ACOT2,AK2,ARG1,ASS1,BCL2L1,C8A,CPT1A,CTSZ,ELOVL5,G6PC,GLA,GM2A,HPD,ITGAV,KRT17,KRT18,KRT6B,KRT8,Mup1 (includes others),OAT,PCYT1A,PEX11A,PLD3,PLSCR1,RPL27A,RPL8,RPS18,RPS2,RPSA,SARDH,SPTBN1,TALDO1,THRSP,TMEM97,VIM,VNN1,YBX1	38 (8)	8				AMPK,CAT,NFKBIA,PPARA	8-oxo-7-hydrodeoxyguanosine,CCND1,SREBF2
benztropine	chemical drug		3		0.146	1.55e-05	AKT1,AMPK,benztropine,CDK5,CHRM1,CHRM2,CHRM3,CHRM4,CHRM5,CNR1,EGFR,ERK,ERK1/2,HRH1,MAPK1,MAPK14,MAPK9,Nfat (family),P38 MAPK,Pkc(s),RAS,SHC1,SLC22A2,SLC6A3,SRF	ANPEP,ARG1,ARSB,ASS1,BGN,BHMT,CDK5RAP3,Ces1b/Ces1c,COL6A2,CPT1A,CTNNA2,DDX25,EIF4E,FDXR,FTL,GLB1,Igkv1-117,ISG15,ITGAV,KCNMA1,KIAA0391,KRT18,KRT6B,KRT8,NCL,NUS1,NUTF2,OAT,PEX11A,PPT2,PRDX1,PRG2,PSAP,RAB5A,RALA,SCD,SERPINF1,SKP2,SPTBN1,SRSF1,SUOX,THRSP,Tpm1,Tpm4,UBE2L3,VNN1,YBX1	47 (25)	19
ciprofloxacin	chemical drug		1		0.632	1.68e-05	ciprofloxacin	CTSA,GUSB,MAN2B2,PSAP,RPL10A,RPL12,Rpl34 (includes others),RPL7A,RPS18,VIM	10 (1)	1				CSF2RB,CTSA,DNAJC3,EPO,GUSB,IGF1R,SEMA4D,SPP1
PPAR ligand-PPAR-Retinoic acid-RXRα	complex		2		1.131	1.69e-05	PPAR ligand-PPAR-Retinoic acid-RXRα,PPARA,RXRA,tretinoin	ABCD2,ACOT2,ACSS2,ANPEP,ASS1,BHMT,C8A,CPT1A,CREG1,CTSC,CYP2S1,EEF1A1,EIF5,ELOVL5,FADS2,G6PD,GM2A,HNRNPF,HNRNPK,HPD,IDE,ISG15,KRT1,KRT18,KRT5,KRT72,LYZ,Mup1 (includes others),NCL,NLN,Nnt,OAT,PCYT1A,PEX1,PEX11A,PLA2G15,PLSCR1,RPL6,RPS19,SARDH,SCD,SCPEP1,SKP2,SLC7A2,STARD10,TALDO1,TPT1,VIM,VNN1,YBX1	50 (4)	3
buclizine	chemical drug		3		0	1.96e-05	Akt,AKT1,AMPK,buclizine,CHRM1,CHRM2,CHRM3,CHRM4,CHRM5,CNR1,EGFR,ERK,ERK1/2,HRH1,HRH3,MAPK1,MAPK14,MAPK9,MTOR,Nfat (family),P38 MAPK,Pkc(s),RAS,SHC1,SRF	ANPEP,ARG1,ARSB,ASS1,BGN,BHMT,CDK5RAP3,Ces1b/Ces1c,CNP,COL6A2,CPT1A,CTNNA2,DDX25,EIF3A,EIF4E,FDXR,FHIT,FTL,Igkv1-117,ISG15,ITGAV,KIAA0391,KRT18,KRT6B,KRT8,NCL,NUS1,NUTF2,OAT,PEX11A,PPT2,PRDX1,PRG2,RAB5A,RPL12,RPL23,RPS18,SCD,SERPINF1,SKP2,SND1,SPTBN1,SRSF1,SUOX,THRSP,Tpm1,Tpm4,UBE2L3,VNN1,YBX1	50 (25)	18
genistein	chemical drug		1	Activated	4.359	2.15e-05	genistein	ARG1,ARSA,BCL2L1,CTSA,CTSH,DNASE2,FUCA1,GALNS,GLB1,GM2A,GUSB,Igkv1-117,MANBA,NEU1,PLA2G15,PLBD2,PPT1,PSAP,SCPEP1	19 (1)	1				AMPK,CAT,CCND1,CDKN1A,CFTR,CTSA,CYP,FOS,GNPTAB,GUSB,HSPA1A/HSPA1B,Ins1,MDC1,NAGLU,NFE2L2,RAB14,SH2B2,SPP1,TFEB,TP53	creatine kinase,Creb,CYP1A1,D-glucose,EPHB1,EPO,Focal adhesion kinase,GAB1,GFPT1,HSPA5,IGF1R,KRT14,MAPK3,MST1R,MYC,NCOR1,NFKBIA,PRLR,PTGS2,PTK2,RAC1,RAS
EPHB2	kinase		2	Activated	2.137	2.19e-05	Akt,EPHB2,ERK,Focal adhesion kinase,HRAS,MAP4K4,MAPK1,P38 MAPK,RAC1,RAS	AGPAT3,ANPEP,ARSB,ASS1,COPB2,CPT1A,CTNNA2,DHRS4,FDXR,FHIT,IGKC,ISG15,KRT17,KRT18,KRT6B,KRT8,MGLL,MVP,NLN,PCYT1A,PEX11A,PEX19,PLSCR1,PPT2,PRDX1,RAB5A,RPL27A,RPL30,RPS10,RPS3,RPS6,SCD,SKP2,SPTBN1,SUOX,Tpm4,VIM	37 (10)	9				Focal adhesion kinase,RAC1	HRAS,MAPK3,RAS
Eph Receptor	group		2	Activated	2.263	3.04e-05	Eph Receptor,HRAS,MAP4K4,MAPK1,RAF1,RAS	AGPAT3,ANPEP,ARSB,COPB2,CTNNA2,CTSH,DHRS4,IGKC,ISG15,ITGAV,KIAA0391,KRT17,KRT18,MGLL,MVP,NLN,PCYT1A,PEX11A,PEX19,PLSCR1,PPT2,PRDX1,RPL27A,RPL30,RPS10,RPS2,RPS3,RPS6,SCD,SNRPD1,SUOX,Tpm4,VIM	33 (6)	5				DOK1	HRAS,MAPK3,RAS
PPARA	ligand-dependent nuclear receptor		1		-1.414	3.23e-05	PPARA	ABCD2,ACOT2,ACSS2,ARG1,ASS1,BCL2L1,C8A,CPT1A,ELOVL5,FADS2,G6PD,HPD,Mup1 (includes others),PEX11A,SARDH,SCD,TALDO1,VNN1	18 (1)	1	15-deoxy-delta-12,14 -PGJ 2,ALOX5,arachidonic acid,carvacrol,ciprofibrate,clofibric acid,dehydroepiandrosterone sulfate,docosahexaenoic acid,fibric acid derivative,gamma-tocotrienol,gemfibrozil,Insulin,leucine,methotrexate,nicotinic acid,oleic acid,oleoylethanolamide,pirinixic acid,PRKACA,TEF,troglitazone	CARHSP1,MLXIPL,N-cor,NCOR1,NR2F2,stavudine,TP53,TXNIP,Ubiquitin		APEX1,CAT,ELOVL5,FASN,FOS,glycogen,HSD17B4,Ikb,INSIG2,NFE2L2,NFKBIA,PRL	GCK,Mup1 (includes others),SREBF1,SREBF2
RAPGEF3	other		2		-0.801	3.5e-05	ACACA,Akt,AMPK,Cdc42,HDAC5,HRAS,MAPK1,P38 MAPK,PTK2,RAC1,Rap,RAPGEF3,STAT3	ANPEP,ARSB,ASS1,BGN,COPB2,CPT1A,CTNNA2,CTSA,CTSH,CTSZ,ETNPPL,FDXR,FHIT,G6PC,GUSB,IGKC,ITGAV,KRT17,KRT18,KRT6B,LYZ,MVP,NLN,OAT,PCYT1A,PEX1,PPT2,RAB5A,RPL27A,RPL30,RPS10,RPS3,RPS6,SCD,SKP2,SUOX,THRSP,Tpm4,YBX1	39 (13)	12				AMPK,Cdc42,D-glucose,HRAS,Ins1,MAPK3,PLCE1,PTK2,RAC1,Rap,RAP2B,SPP1
IRS2	enzyme		2		-1.342	3.79e-05	AKT1,ERK,ERK1/2,FOXO1,GCK,GRB2,HMGA1,Insulin,IRS2,JAK2,P38 MAPK,PI3K (complex),PIK3R1,STAT1,STAT3	ACOT12,ARG1,ASS1,BGN,BHMT,CDK5RAP3,Ces1b/Ces1c,CKMT2,CPT1A,CTSC,CTSH,FADS2,FDXR,FHIT,FTL,G6PC,G6PD,HNRNPK,IDE,ISG15,KRT17,KRT18,LYZ,MAVS,MRPL45,MRPL47,MRPL55,PDK2,PEX1,PEX11A,PLIN3,RAB5A,RPL23,RPL7A,RPS16,RPS6,SCD,SERPINF1,SET,SKP2,SPTBN1,SRSF3,THRSP,UBE2L3,VNN1	45 (15)	15	AGT,benzyloxycarbonyl-Leu-Leu-Leu aldehyde,cocaine,CSF2RB,EPO,GIP,IGF1R,IL15,sirolimus,thiazolidinedione,TSC2	GAB1,oleic acid,palmitic acid,PIK3R2,RICTOR,S-nitrosoglutathione,TCR,XBP1		CCND1,FASN,FOS,glycogen,MYC,PRL,SREBF2	ACLY
tanespimycin	chemical drug		1		1.897	3.88e-05	tanespimycin	BCL2L1,KRT18,KRT8,RPL24,RPL27A,RPL30,RPL35,RPS16,RPS8,SCD	10 (1)	1	NQO1			DDIT3,HSP90B1,HSPA1A/HSPA1B,HSPA5,MAP3K5	AKT3,CCND1,CDKN1A,FASN,IGF1R,KRAS,MYC,SREBF1,SREBF2,SRSF2
salinomycin	chemical - endogenous non-mammalian		2		0.784	4.26e-05	EIF2S1,KRAS,LRP6,MAP3K7,MAPK14,MTOR,p70 S6k,salinomycin	ANPEP,BCL2L1,BGN,CNP,CXADR,EEF1A1,EIF3A,EIF5,G6PC,G6PD,HRAS,ISG15,KRT18,MTRR,PRDX1,RPL12,RPL23,RPS18,RPS6,RPSA,SCD,SKP2,SND1,SPTBN1,TMEM109,VPS35	26 (8)	7					CCND1,KRAS,LRP6
Sos	group		2		-1.897	4.51e-05	EIF2AK2,EIF2S1,ERK,ERK1/2,HRAS,INPP5D,KRAS,MAPK1,MAPK8,Mek,RAC1,Raf,RAS,Sos	ANPEP,ARG1,ARSB,BHMT,COPB2,CTNNA2,CXADR,EEF1A1,EIF5,G6PC,G6PD,GUSB,HRAS,Ighg2b,IGKC,ISG15,ITGAV,KRT17,KRT18,KRT6B,MTRR,NLN,PCYT1A,PPT2,PRDX1,RPL23,RPL27A,RPL30,RPS10,RPS3,RPS6,RPSA,SPTBN1,SUOX,TMEM109,Tpm1,Tpm4,VIM,VNN1,VPS35	40 (14)	13	GNA12,Ins1,Insulin,TCR			HRAS,KRAS,RAC1,RAS
SH2B2	other		2		-0.928	4.53e-05	HRAS,IRS1,MAPK1,SH2B2,STAT5B,VAV3	ANPEP,ARSB,CKMT2,COPB2,CTNNA2,G6PC,GUSB,IGKC,ISG15,ITGAV,KRT17,KRT18,MVP,NLN,PCYT1A,PLSCR1,PPT2,RALA,RPL27A,RPL30,RPS10,RPS3,RPS6,SCD,SUOX,TANK,THRSP,Tpm4,VIM	29 (6)	5	genistein,Insulin,L-triiodothyronine			HRAS	FOS,MYC
anthralin	chemical drug		1		0.577	4.72e-05	anthralin	BCL2L1,KRT1,KRT18	3 (1)	1
BSCL2	other		2		-1.569	4.97e-05	AGPAT2,BSCL2,Creb,MAPK1,SREBF1	ACSS2,ACY3,ANPEP,ARSB,BCL2L1,CPT1A,CTNNA2,CXADR,FADS2,G6PD,GLB1,ISG15,ITGAV,KRT1,KRT17,MVP,PCYT1A,PLD3,PLIN3,PLSCR1,PPT2,RNASET2,SUOX,THRSP,TMEM97,VIM	26 (5)	4	Insulin			ADIPOQ,Creb,SREBF1	D-glucose,Ins1
NF1	other		1	Activated	2.236	5.49e-05	NF1	BCL2L1,NCL,RPL10A,RPL21,RPS19	5 (1)	1				Creb,HRAS	CCND1,KRAS,MAPK3,MYC,RAC1,RAS
PPP1R9A	other		3		1.313	5.68e-05	ACACA,ACLY,Akt,BCAR1,BCL2,CDK9,Creb,EIF2S1,ERK1/2,ITPR1,Map3k7,MAPK1,MTOR,NFKBIA,P38 MAPK,PFKFB1,PP1 protein complex group,Ppp1cc,PPP1R9A,PRKCH,RB1	ACSS2,ACY3,AK2,ANPEP,ARSB,ASS1,BGN,BHMT,CNP,CTNNA2,CTSH,CTSZ,EIF3A,FDXR,FHIT,G6PC,G6PD,GM2A,HRAS,Ighg2b,ITGAV,KRT17,KRT18,KRT5,KRT8,MRPL55,PLD3,PLIN3,PPT2,RAB5A,RALA,RPL12,RPL23,RPL27A,RPL8,RPS18,RPS2,RPSA,SCD,SKP2,SND1,SPTBN1,SUOX,Tpm1,TXN2,VIM,VNN1	47 (21)	18
DOK1	kinase		2	Activated	2.287	5.91e-05	AKT1,DOK1,ERK,ERK1/2,HRAS,MAPK1,Mek,Nfat (family),RAF1,RAS,STAT4	ACP6,ANPEP,ARSB,ASS1,BGN,BHMT,Ces1b/Ces1c,COPB2,CTNNA2,CTSH,G6PC,GUSB,IGKC,ISG15,ITGAV,KIAA0391,KRT17,MGLL,MVP,NLN,NUS1,PCYT1A,PEX11A,PLSCR1,PPT2,PRDX1,RPL23,RPL27A,RPL30,RPS10,RPS2,RPS3,RPS6,SERPINF1,SMPDL3A,SNRPD1,SPTBN1,SUOX,Tpm1,Tpm4,UBE2L3,VIM,VNN1	43 (11)	10	Eph Receptor,Insulin,SRMS,TP53	9-keto-12-oxo-10-dodecenoic acid 2-lyso-phosphocholine ester			ADIPOQ,HRAS,RAS,RASA1
ELAVL1	other		2		1.89	6.93e-05	CCND1,CDKN1A,ELAVL1,JINK1/2,mir-8,NOS2,P38 MAPK	ASS1,BCL2L1,BCLAF1,BGN,CENPE,CTSC,EIF5,FDXR,G6PC,G6PD,GLB1,ISG15,KRT1,KRT18,NCL,PCYT1A,PLSCR1,PSAP,RAB5A,RPL10,RPL13,RPL27A,RPS6,SCD,SKP2,TALDO1,TKT,YBX1	28 (7)	7	AGT,amino acids	AMPK		CCND1,CDKN1A,NEK2,PBK,PTGS2,TP53
oxymetazoline	chemical drug		3		1.677	6.98e-05	ADRA1A,ADRA1B,ADRA1D,ADRA2A,ADRA2B,ADRA2C,Akt,EGFR,ERK,FOS,HTR1B,MAPK1,MAPK14,MAPK8,oxymetazoline,p70 S6k,PI3K (complex),RAS,STAT3,TGM2	ACSS2,ANPEP,ARG1,ARSB,BGN,COL6A2,CPT1A,CTNNA2,EEF1A1,EIF4E,FARS2,FHIT,G6PC,G6PD,GM2A,ISG15,KIAA0391,KRT18,KRT8,LYZ,NCL,NLN,NUTF2,PEX1,PPT2,PRDX1,RALA,RPL23,RPL9,RPLP0,RPS18,RPS24,RPS6,RPS7,RPS9,SCD,SKP2,SLC7A2,SNAP23,SPTBN1,SRSF1,SUOX,Tpm1	43 (20)	13
SYNGAP1	other		2		-1.213	7.26e-05	HRAS,Rap,RAS,SYNGAP1	ANPEP,BCL2L1,COPB2,GUSB,IGKC,KRT18,MVP,NLN,PCYT1A,PRDX1,RPL27A,RPL30,RPS10,RPS3,RPS6,Tpm4,VIM	17 (4)	3	CDK5			HRAS	Rap,RAS
tranilast	chemical drug		2	Inhibited	-3.024	7.78e-05	AKT1,CDK2,ERK1/2,NFKBIA,NOS2,tranilast	AK2,ASS1,BHMT,Ces1b/Ces1c,CTSC,CTSZ,G6PC,G6PD,GM2A,ISG15,ITGAV,KRT18,KRT8,PCYT1A,PEX11A,PLD3,PLSCR1,RPL27A,RPL8,RPS18,RPS2,RPSA,SERPINF1,SPTBN1,TKT,UBE2L3,VIM,VNN1	28 (6)	5				CDH1,CDKN1A,TP53	NFKBIA,TXNIP
methapyrilene	chemical drug		1		-0.707	9.02e-05	methapyrilene	ASS1,CPT1A,EEF1A1,RPL13A,RPL27,RPS8,RPS9,SCD	8 (1)	1				CCND1,DDIT3,HSPA5,MYC,TP53	CAT,EHHADH,FABP1
SREBF1	transcription regulator		1		-1.155	9.32e-05	SREBF1	ACSS2,BCL2L1,CXADR,FADS2,G6PC,G6PD,GLB1,PCYT1A,RNASET2,SCD,THRSP,TMEM97	12 (1)	1	BSCL2,carbohydrate,DL-fructose,HRAS,HSPA5,IGF1R,Inflammasome (Nalp3, Asc, Casp1),KDM1A,leucine,MAPK3,Nisch,palmitic acid,RAS,RICTOR,SCAP,SREBF2,TO-901317	1,2-dithiol-3-thione,15-deoxy-delta-12,14 -PGJ 2,acadesine,alvespimycin,AMPK,arachidonic acid,CDN1163,docosahexaenoic acid,ELOVL2,ELOVL5,FGF19,GCG,INSIG2,N-cor,NFE2L2,OBP2B,pirinixic acid,PML,PPARA,PRKAA,SIK1/SIK1B,sirolimus,sphingomyelin,tanespimycin,xanthohumol		ACLY,CDKN1A,EHHADH,FASN,GPAM
KRAS	enzyme		1		-1.291	9.56e-05	KRAS	ANPEP,BCL2L1,BGN,CXADR,EEF1A1,EIF5,G6PD,ISG15,MTRR,RPS6,RPSA,TMEM109,Tpm1,VIM,VPS35	15 (1)	1	5-fluorouracil,ADI PEG20,AGT,EPO,HRAS,Ins1,MYC,RBBP4,Sos,Trk Receptor	bryostatin 1,NF1,salinomycin,tanespimycin		CCND1,DDIT3,FOS,HSPA5,IGF1R,MAPK12,NFE2L2,NFKBIA,NFKBIB,NQO1,PTGS2,RAS,S100A4	CDH1,IP6K2,miR-542-3p (miRNAs w/seed GUGACAG),MYCN
RAP2B	enzyme	1.186	2		-1.633	9.65e-05	HRAS,MAPK1,RAP2B	ANPEP,ARSB,BCL2L1,COPB2,CTNNA2,GUSB,IGKC,ISG15,ITGAV,KRT17,KRT18,MVP,NLN,PCYT1A,PLSCR1,PPT2,RPL27A,RPL30,RPS10,RPS3,RPS6,SUOX,Tpm4,VIM	24 (3)	2	RAPGEF3	mir-194		HRAS,MAPK3,PLCE1
glycogen	chemical - endogenous mammalian		3		0.152	9.68e-05	ACLY,Akt,BCAR1,BCL2,CDK9,Creb,D-glucose,EIF2S1,glycogen,hexokinase,ITPR1,MAPK1,MTOR,PFKFB1,PP1 protein complex group,SLC29A1	ACSS2,ACY3,ANPEP,ARSB,ASS1,CNP,CTNNA2,CTSH,EIF3A,FABP2,FDXR,FHIT,G6PC,G6PD,HNRNPK,HRAS,Ighg2b,ISG15,ITGAV,KRT1,KRT17,NEU1,OAT,PLSCR1,PPT2,RALA,RPL10A,RPL12,RPL23,RPL3,RPS18,RPS27L,RTN3,SKP2,SLC25A4,SND1,SUOX,TALDO1,THRSP,TKT,Tpm1,TXNRD1,VIM	43 (16)	13	2-deoxyglucose,DL-fructose,ELOVL5,GCK,Ins1,Insulin,IRS2,MYC,NQO1,oleic acid,PPARA	acadesine,AMPK,MLXIPL,palmitic acid,PFKFB1,RPS6KB2,TFEB
carrageenan	chemical - endogenous non-mammalian		2		1.061	9.77e-05	carrageenan,FOS,MAPK12,MAPK13,MTOR,NFKBIA,PI3K (complex)	AK2,BCL2L1,CNP,CTSZ,EIF3A,FARS2,FHIT,G6PC,G6PD,GM2A,ISG15,ITGAV,KRT18,PLD3,PRDX1,RPL12,RPL23,RPL27A,RPL8,RPL9,RPLP0,RPS2,RPS24,RPS6,RPS7,RPS9,RPSA,SKP2,SNAP23,SND1,SPTBN1,VIM	32 (7)	7				FOS,NFKBIA,PTGS2	MAPK12
GNG13	enzyme		3		-1.029	0.000105	CD38,GNG13,HRAS,Ikb,MAPK1,Pkc(s),PLCB1,PLCE1,RELA,STAT6	ANPEP,ARG1,ARSB,ASS1,COPB2,CPOX,CPT1A,CRELD2,CTNNA2,GUSB,Ighg2b,IGKC,ISG15,ITGAV,KRT17,KRT18,KRT6B,KRT8,MVP,NLN,PCYT1A,PLSCR1,PPT2,RPL27A,RPL30,RPS10,RPS3,RPS6,SCO2,SUOX,TANK,TMEM97,Tpm4,VIM	34 (10)	7				PLCE1
thiazolidinedione	chemical drug		2		-1.333	0.000106	AMPK,ERK,ERK1/2,Insulin,MAPK1,PI3K (complex),PPARG,SLC2A4,thiazolidinedione	ACOT12,ANPEP,ARG1,ARSB,BGN,BHMT,CTNNA2,FABP2,FADS2,FHIT,FTL,G6PC,G6PD,HNRNPK,IDE,ISG15,KRT17,MGLL,MVP,OAT,PDK2,PEX11A,PLIN3,PLSCR1,PPT2,RPL23,RPS16,RPS6,RPSA,SCD,SKP2,SPTBN1,SRSF3,SUOX,VNN1,YBX1	36 (9)	8				ADIPOQ,AMPK,Insulin,IRS2	D-glucose
Scf	complex		2		-0.928	0.000126	CDKN1A,CDKN1B,FOS,FOXO3,IREB2,NFKBIA,Scf	AK2,BCL2L1,CPT1A,CTSZ,DDX25,FARS2,FTL,G6PC,GLB1,GM2A,ISG15,PLD3,PPT2,PSAP,RPL27A,RPL8,RPL9,RPLP0,RPS2,RPS24,RPS6,RPS7,RPS9,RPSA,SKP2,SNAP23,SPTBN1,TXN2,YBX1	29 (7)	6					CDKN1A,FOS,NFKBIA
RPS6KA2	kinase		2		0.316	0.00013	CEBPB,CREB1,FOS,NFKBIA,RPS6KA2,SRF	AK2,ARG1,BHMT,CPT1A,CTNNA2,CTSC,CTSZ,FARS2,FTL,G6PC,GAA,GLA,GM2A,IGKC,Igkv1-117,ISG15,ITGAV,KRT18,KRT6B,PDXK,PLD3,PRCP,RPL27A,RPL8,RPL9,RPLP0,RPS2,RPS24,RPS6,RPS7,RPS9,RPSA,SCD,SNAP23,SPTBN1,SYNJ2,Tpm1,Tpm4,TPT1,VIM	40 (6)	5	Ins1,MAPK3,MST1R,TP53			FOS,NEK2,NFKBIA
NRIP1	transcription regulator		1		0	0.000137	NRIP1	GYS2,OPLAH,PDK2,SCD,SUOX,THRSP	6 (1)	1	troglitazone	Ctbp		D-glucose,FASN,PRL	Rar
EPHB1	kinase		2		0	0.000143	BCAR1,EPHB1,ERK,ERK1/2,HRAS,ITGB3,MAP4K4,MAPK1,P38 MAPK,PTK2,RAF1,SHC1,SRC	AGPAT3,ANPEP,ARSB,ASS1,BGN,BHMT,COPB2,CTNNA2,CTSH,DHRS4,FDXR,FTL,IGKC,ISG15,ITGAV,KIAA0391,KRT17,KRT18,MVP,NLN,PCYT1A,PEX11A,PEX19,PPT2,RAB5A,RALA,RPL27A,RPL30,RPS10,RPS2,RPS3,RPS6,SCD,SKP2,SNRPD1,SPTBN1,SUOX,Tpm4,VIM,VNN1	40 (13)	12	arachidonic acid	genistein		FOS,HRAS,MAPK3,PTGS2,PTK2
SREBF2	transcription regulator		1	Inhibited	-2.646	0.000152	SREBF2	ACSS2,FADS2,G6PD,PCYT1A,SCD,THRSP,TMEM97	7 (1)	1	amino acids,HSPA5,Inflammasome (Nalp3, Asc, Casp1),Insulin,IRS2,isoquercitrin,MAPK3,RICTOR,SCAP,sterol	alvespimycin,betulin,carnosine,gamma-tocotrienol,GCG,INSIG2,PML,PPARA,tanespimycin		ACLY,CDKN1A,D-glucose,FASN,REG1A,SREBF1	Ins1
RBX1	enzyme		2	Inhibited	-3.536	0.000163	BRCA1,GMNN,IRS1,NFKBIA,PML,PRKCI,RBX1,SMAD3,SMAD4,TET1,TET2,VHL	AK2,BGN,COPB2,CPT1A,CTSZ,CYP2S1,FABP2,FTL,G6PC,GM2A,ISG15,ITGAV,KRT17,KRT18,KRT8,LYZ,MAVS,PLD3,PLSCR1,PRDX1,RPL27A,RPL8,RPS18,RPS2,RPS6,RPSA,SCD,SKP2,SLC25A4,SPTBN1,TXN2,TXNRD1	32 (12)	11	IL15	CD 437,ST1926		VHL	NFKBIA,PML
doxifluridine	chemical drug		1		1	0.000163	doxifluridine	FDXR,RPL10A,RPL3,RPS27L	4 (1)	1				CDKN1A
CKS1B	kinase		2		1.877	0.000177	CDK2,CDKN1A,CDKN1B,CKS1B,FOXM1,NFKBIA	AK2,CENPE,CTSZ,DDX25,GLB1,GM2A,ISG15,ITGAV,KRT18,KRT8,PCYT1A,PLD3,PPT2,PSAP,RPL27A,RPL8,RPS18,RPS2,RPSA,SKP2,SPTBN1,VIM,YBX1	23 (6)	5		TP53			CDKN1A
(-)-arctigenin	chemical reagent		2		0	0.000212	(-)-arctigenin,Akt,AMPK,ERK1/2,MAPK1,MTOR,NOS2,P38 MAPK,p70 S6k,PI3K (complex)	ANPEP,ARSB,ASS1,BGN,BHMT,CNP,CPT1A,CTNNA2,CTSC,EEF1A1,EIF3A,FDXR,FHIT,G6PC,G6PD,ISG15,ITGAV,KRT17,MVP,OAT,PLSCR1,PPT2,RAB5A,RPL12,RPL23,RPS18,SCD,SKP2,SND1,SUOX,THRSP,TKT,VNN1,YBX1	34 (10)	9				AMPK
CCL11	cytokine		2		-1.826	0.000223	CCL11,CCR3,ERK1/2,HRAS,MAPK1,MAPK14,RAS	ANPEP,ARSB,BCL2L1,BHMT,COPB2,CTNNA2,G6PC,GUSB,IGKC,ISG15,ITGAV,KRT17,KRT18,MVP,NLN,PCYT1A,PLSCR1,PPT2,PRDX1,PRG2,RPL27A,RPL30,RPS10,RPS3,RPS6,SUOX,Tpm1,Tpm4,VIM,VNN1	30 (7)	7	IL15	ADA,methotrexate,N-nitro-L-arginine methyl ester,NFKBIA		FGF6,HRAS,RAS
CDH1	other		1		-1.89	0.000238	CDH1	DDB1,FABP2,KRT13,KRT18,RALA,SKP2,VIM	7 (1)	1	AMPK,BANP,benzyl isothiocyanate,benzyloxycarbonyl-Leu-Leu-Leu aldehyde,CDC14A,CXCL14,dactolisib,epigallocatechin-gallate,FASN,FGF3,GCK,HOXA7,HRAS,IGF1R,KDM1A,methotrexate,NFE2L2,NFKBIA,PRKAA,PRL,SKI,TFEB,tranilast,VHL	GPI,HMG20A,HSPA5,IL15,KRAS,MST1R,MUC1,ochratoxin A,PTGS2,SNAI1,SPP1,SRSF2,TCR,TP53,troglitazone		Alpha catenin,HOXA1	Focal adhesion kinase
SLC29A1	transporter	-1.097	1		1	0.000258	SLC29A1	FDXR,RPL10A,RPL3,RPS27L	4 (1)	1	Insulin	D-glucose		CDKN1A,Creb
RAPGEF5	other		3		-1.521	0.000261	AKT1,CTNNB1,ELK1,FOS,Jnk,P38 MAPK,RAC1,RAF1,RALGDS,RAP1A,RAPGEF5,SRF	ASS1,BGN,Ces1b/Ces1c,CTSH,FARS2,FDXR,Igkv1-117,ITGAV,KIAA0391,KRT6B,KRT8,MGLL,Mup1 (includes others),OAT,PEX11A,PLSCR1,PRG2,RAB5A,RALA,RPL9,RPLP0,RPS18,RPS2,RPS24,RPS6,RPS7,RPS9,SERPINF1,SNAP23,SNRPD1,SRSF1,Tpm1,Tpm4,UBE2L3,VIM	35 (12)	10
8-shogaol	chemical - endogenous non-mammalian		3		-0.174	0.000261	8-shogaol,Akt,AKT1,arachidonic acid,Cdc42,Cpla2,Creb,Jnk,MAPK9,P38 MAPK,PLA2G10,PLA2G4A,PLA2G6,PPARG	ACY3,ARG1,ASS1,BCL2L1,BGN,Ces1b/Ces1c,CPT1A,CTSA,CTSH,CTSZ,EIF4E,FABP2,FADS2,FDXR,FHIT,G6PD,ITGAV,KRT1,KRT13,KRT18,MGLL,NCL,PEX11A,PLIN3,PLSCR1,RAB5A,RPSA,SERPINF1,SRSF3,THRSP,UBE2L3,VIM,VNN1	33 (14)	12
10-shogaol	chemical - endogenous non-mammalian		3		-0.174	0.000266	10-shogaol,Akt,AKT1,arachidonic acid,Cdc42,Cpla2,Creb,Jnk,MAPK9,P38 MAPK,PLA2G10,PLA2G4A,PLA2G6,PPARG	ACY3,ARG1,ASS1,BCL2L1,BGN,Ces1b/Ces1c,CPT1A,CTSA,CTSH,CTSZ,EIF4E,FABP2,FADS2,FDXR,FHIT,G6PD,ITGAV,KRT1,KRT13,KRT18,MGLL,NCL,PEX11A,PLIN3,PLSCR1,RAB5A,RPSA,SERPINF1,SRSF3,THRSP,UBE2L3,VIM,VNN1	33 (14)	12				arachidonic acid
monorden	chemical - endogenous non-mammalian		2		1.257	0.000291	ACLY,AKT1,ATF6,Hsp90,Jnk,monorden,P38 MAPK,PRKAA2,RELA,STK11,TRAP1	ACP6,ACSS2,AK2,ASS1,BCL2L1,BGN,Ces1b/Ces1c,CPT1A,EARS2,EIF3A,FDXR,GARS,ITGAV,MAVS,OAT,PEX11A,PLSCR1,RAB5A,RPS6,SARDH,SCD,SCO2,SERPINF1,STARD10,TALDO1,TANK,TKT,TXN2,TXNRD1,UBE2L3,YBX1	31 (11)	10				DDIT3,HSP90B1,HSPA5	ACLY,TRAP1
Insulin	group		1		-1.5	0.000305	Insulin	ACOT12,BCL2L1,FADS2,FTL,G6PC,G6PD,HNRNPK,IDE,PDK2,PLIN3,RPS16,RPS6,SCD,SKP2,SRSF3,THRSP	16 (1)	1	carbohydrate,dehydroepiandrosterone sulfate,DL-fructose,GIP,Ins1,L-triiodothyronine,leucine,thiazolidinedione,TO-901317	GFPT1,oleic acid,palmitic acid,sirolimus		ACLY,AGT,AKT3,ARG2,BSCL2,CA3,CCND1,Cdc42,DOK1,EIF4B,FASN,FOS,GAB1,GCK,glycogen,GPAM,GRB14,HRAS,IGF1R,INSIG2,Ldh (complex),MAPK12,MAPK3,MLXIPL,NFKBIA,Pde3,phosphocreatine,POLDIP3,PPARA,PRKAA,PRKACA,PTK2,RAC1,RAS,RASA1,RICTOR,SH2B2,SKI,SLC29A1,Sos,SREBF2,XBP1	CYP1A1,Ikb,mir-491,TSC2
DDIT3	transcription regulator		2		0.169	0.000335	BBC3,BCL2,CEBPB,DDIT3,EIF2S1,IL1B,TRIB3	ARG1,ASS1,BCL2L1,BGN,BHMT,CPT1A,CTSC,CTSH,EIF4E,FTL,G6PC,G6PD,GARS,GUSB,HRAS,Ighg2b,IGKC,ISG15,ITGAV,KRT18,KRT6B,PLSCR1,PRDX1,PRG2,RPSA,SCD,SGPL1,SKP2,SLC14A2,SLC25A4,SRSF1,SRSF6,THRSP,TPT1,VIM	35 (7)	7	15-deoxy-delta-12,14 -PGJ 2,2-deoxyglucose,5-fluorouracil,arsenite,benzyloxycarbonyl-Leu-Leu-Leu aldehyde,BOK,carfilzomib,D-glucose,EPO,HRAS,IGF1R,Ins1,KRAS,MAPK11,MAPK12,methapyrilene,monorden,nitrofurantoin,palmitic acid,PRKACA,tanespimycin,temozolomide,TP53,troglitazone	ACOX1,amino acids,CDN1163,DNAJC3,docosahexaenoic acid,FASN,leucine,LPCAT1,MYC,NCK2,polyamines,RBM3,sirolimus,TSC2,Ubiquitin		CHAF1A,SRSF2	DOCK4,STX1A,TXNIP
TRPC5	ion channel		2		0.943	0.000348	AKT1,CCND1,TRPC5	ASS1,BCL2L1,BCLAF1,Ces1b/Ces1c,EIF5,G6PC,ITGAV,KRT1,PCYT1A,PEX11A,RPL10,RPL13,RPL27A,RPS6,SERPINF1,TALDO1,UBE2L3,VIM	18 (3)	2	RAC1			CCND1
HSP	group		2		-1.964	0.000369	DNAJB6,HSP,HSP90B1,HSPA4,HSPA5,HSPA9,HSPB2,TLR4,TRAP1	BCL2L1,CPT1A,EARS2,G6PC,GARS,HRAS,IDE,ISG15,KRT18,MAVS,RPL12,RPL27A,RPL30,RPL7,RPLP2,RPS20,SCD,SGPL1,SMPDL3A,TXN2,VIM	21 (9)	8	benzyloxycarbonyl-Leu-Leu-Leu aldehyde
RAP1GAP	other		2		1.732	0.00038	ERK1/2,FOXO1,HRAS,PTK2B,RAC1,Rap,RAP1GAP,RPS6KB1,SRC	BCL2L1,BHMT,CDK5RAP3,CKMT2,COPB2,G6PC,GUSB,IGKC,ISG15,ITGAV,KRT18,KRT6B,MAVS,MRPL45,MRPL47,MRPL55,MVP,NLN,PCYT1A,RPL27A,RPL30,RPS10,RPS3,RPS6,Tpm4,VIM,VNN1	27 (9)	8	cAMP-dependent protein kinase,sulindac sulfide	TSH		FOS	CCND1,HRAS,MAPK3,RAC1,Rap
Grb2-Shc1-Sos	complex		2	Inhibited	-2.5	0.000404	Grb2-Shc1-Sos,HRAS,RAS	ANPEP,BCL2L1,COPB2,GUSB,IGKC,KRT18,NLN,PCYT1A,PRDX1,RPL27A,RPL30,RPS10,RPS3,RPS6,Tpm4,VIM	16 (3)	2				HRAS,RAS
CFTR	ion channel		2	Inhibited	-2.558	0.000417	CFTR,HDAC2,Mapk,NFKBIA,PLAU	AK2,ARG1,BCL2L1,CTSZ,Cyp2c40 (includes others),FABP2,FADS2,FDXR,GM2A,ISG15,ITGAV,KRT18,KRT8,PLD3,RPL27A,RPL8,RPS18,RPS2,RPSA,SCD,SPTBN1,VIM	22 (5)	5	genistein,PRKACA,S-nitrosoglutathione,spiperone,USF2	benzyloxycarbonyl-Leu-Leu-Leu aldehyde,L-triiodothyronine,sphingomyelin,STX1A,YY1		docosahexaenoic acid,FAAH,HSD17B4	arachidonic acid,PTGS2
CUL1	enzyme		2	Inhibited	-4.017	0.000422	BRCA1,CCND1,CDKN1A,CDKN1B,CUL1,ELF4,NFKBIA,SMAD3,SMAD4	AK2,BCLAF1,BGN,CTSZ,DDX25,EIF5,GLB1,GM2A,ISG15,KRT1,KRT17,KRT8,LYZ,PLD3,PLSCR1,PPT2,PSAP,RPL10,RPL13,RPL27A,RPL8,RPS18,RPS2,RPS6,RPSA,SKP2,SLC25A4,SPTBN1,TALDO1,YBX1	30 (9)	9	1,2-dithiol-3-thione,MYC,NFE2L2	EPO			CCND1,CDKN1A,NFKBIA,TP53
L-triiodothyronine	chemical - endogenous mammalian		1		-0.5	0.000471	L-triiodothyronine	ABCD2,ACOT2,ARSA,CPT1A,CTSH,ETF1,G6PC,G6PD,ITGAV,KRT17,LYZ,Mup1 (includes others),OAT,PDK2,SCD,THRSP	16 (1)	1				ADAMTS5,AGT,AMPK,CCND1,CDKN1A,FABP1,FASN,FGFR1,HINT1,Insulin,Kap,MLXIPL,Mup1 (includes others),PRKAA,PRL,SH2B2,sterol,TP53	ACOX1,ADIPOQ,CFTR,EHHADH,FOS,GCK,IGF1R,MYC,NFKBIA,TSH
Ephb	group		2		-1.569	0.000495	EFNB1,Ephb,HRAS,MAPK1,MAPK14,PTK2,RAC1,RHOA	ARSB,BCL2L1,COPB2,CTNNA2,G6PC,GUSB,IGKC,ISG15,ITGAV,KRT17,KRT18,KRT6B,MVP,NLN,PCYT1A,PLSCR1,PPT2,RPL27A,RPL30,RPS10,RPS3,RPS6,SKP2,SUOX,Tpm1,Tpm4	26 (8)	7				HRAS,MAPK3,PTK2,RAC1	RAS
Chuk-Ikbkb-Ikbkg	complex		2	Activated	3	0.0005	Chuk-Ikbkb-Ikbkg,Ikb,NFKBIA	AK2,BCL2L1,CTSZ,GM2A,ISG15,ITGAV,KRT18,KRT6B,KRT8,PLD3,RPL27A,RPL8,RPS18,RPS2,RPSA,SPTBN1	16 (3)	2				Ikb,NFKBIA
COL4A3	other		2	Inhibited	-2.837	0.000516	COL4A3,MMP2,MTOR,NFKBIA	AK2,BCL2L1,CNP,CTSZ,EIF3A,GM2A,ISG15,ITGAV,KRT18,KRT8,PLD3,RPL12,RPL23,RPL27A,RPL8,RPS18,RPS2,RPSA,SKP2,SND1,SPTBN1	21 (4)	3				COL4A4	NFKBIA,PTGS2
PPP2CB	phosphatase		2		-0.333	0.000593	ACACA,ATR,CHEK1,MAP2K3,NR2C2,PPP2CB,PRKAA	ARL1,BCL2L1,CPT1A,G6PC,ISG15,SCD,THRSP,VIM,YBX1	9 (7)	6					PRKAA
clotrimazole	chemical drug		2		1.461	0.000622	ABCB4,CCNE1,clotrimazole,EIF2AK2,EIF2S1,NR1I2,NR1I3,P38 MAPK,PRL,RELA	ABCD2,ARG1,ASS1,BGN,BHMT,CPOX,CPT1A,CTSA,CTSH,FDXR,G6PC,GUSB,HRAS,IDE,ITGAV,KRT5,KRT72,Mup1 (includes others),Nat8f2,PCYT1A,PDK2,RAB5A,RPSA,SCD,SCO2,SND1,TANK,TECR,THRSP,VIM	30 (10)	9				CCND1	CYP,PRL
mediator	complex		2		-0.229	0.000632	HNF4A,MED1,MED13,mediator	ACP6,ACSS2,ANPEP,ARG1,CPT1A,CTSZ,FABP2,FADS2,FMO3,G6PC,HPD,KRT17,PEX11A,PSAP,RPLP0,SLC26A11,SRSF3,THRSP,TKT	19 (4)	3				FOS
17beta-estradiol-17-beta-D-glucuronide	chemical reagent		3		0.816	0.000644	17beta-estradiol-17-beta-D-glucuronide,adenosine,ADORA2A,Alp,ATP,Creb,Focal adhesion kinase,MMP2,NT5E,PRL	ACY3,ARG1,BCL2L1,CPT1A,CTSA,CTSH,G6PC,HNRNPK,IDE,ISG15,KRT1,KRT18,KRT5,KRT72,KRT8,PDK2,PLIN3,PLSCR1,RPSA,SKP2,SND1,SPTBN1,TECR,VIM	24 (10)	7				NT5E
NCX-4040	chemical drug		2	Activated	2.6	0.000682	CYP1B1,NCX-4040,NFKBIA,TCF7L2	ABCD2,ACOT4,ACY3,AK2,CNP,CTSZ,ENPP4,G6PC,GM2A,GYS2,ISG15,ITGAV,KRT18,KRT8,PLD3,RPL27A,RPL8,RPS18,RPS2,RPSA,SKP2,SNAP23,SPTBN1,SRSF1,TXNDC16	25 (4)	3				NFKBIA,NQO1	CYP,CYP1A1
FGF6	growth factor		2		-0.816	0.000698	FGF6,Fgfr,FGFR1,FGFR2,MAPK1,RAF1,RAS	ANPEP,ARSB,BCL2L1,CTNNA2,CTSC,CTSH,DDX25,EEF1A1,EIF4E,ISG15,ITGAV,KIAA0391,KRT1,KRT17,MGLL,MVP,PLSCR1,PPT2,PRDX1,RPS2,RPS6,SNRPD1,SUOX,VIM	24 (7)	6	CCL11			FGFR1,MAPK3,RAS
PRL	cytokine		1		-0.832	0.000707	PRL	BCL2L1,CTSA,CTSH,IDE,ISG15,KRT5,KRT72,PDK2,PLSCR1,RPSA,SND1,TECR,VIM	13 (1)	1	FGF19,HRAS,IRS2,L-triiodothyronine,NRIP1,pirinixic acid,PPARA,PRKACA,RAC1,TRH	6-aminonicotinamide,cAMP-dependent protein kinase,clotrimazole,cocaine,temozolomide		arachidonic acid,CCND1,CDH1,CTSA,GCK,GNA12,IGF1R,KRT14,MAPK3,MYC,pregnenolone,SPP1	BOK,CDKN1A
carfilzomib	biologic drug		2	Activated	2.985	0.00073	26s Proteasome,carfilzomib,Jnk,MCL1,NFKBIA,PARP,PSMB9	AK2,ARG1,CENPE,CTSA,CTSZ,GM2A,ISG15,ITGAV,KRT18,KRT8,PLD3,PLSCR1,PSAP,RPL27A,RPL8,RPS18,RPS2,RPS3,RPSA,SPTBN1,TPT1,VIM	22 (7)	6				DDIT3,HSP90B1,NFKBIA
FMR1	translation regulator		2		0.816	0.000742	AKT1,EIF4E,FMR1,MTOR,PI3K (complex),RAS	ANPEP,ASS1,BCL2L1,BCLAF1,Ces1b/Ces1c,CNP,DGUOK,EIF3A,FHIT,G6PC,G6PD,HRAS,PEX11A,PRDX1,RPL12,RPL23,RPS18,RPSA,SERPINF1,SKP2,SND1,UBE2L3,VIM,ZPR1	24 (6)	6	benzyloxycarbonyl-Leu-Leu-Leu aldehyde	sirolimus			PIK3CB,PRKACA,RAS,TSC2
leucine	chemical - endogenous mammalian		2		0.756	0.000763	AKT1,AMPK,EIF2S1,ERK1/2,INSR,leucine,LIPE,MLST8,MTOR,p70 S6k,PI3K (complex),RPS6KB1	ACOT2,ACSS2,ASS1,ATP5S,BHMT,Ces1b/Ces1c,CKMT2,CNP,EEF1A1,EIF3A,FHIT,G6PC,G6PD,HRAS,ISG15,OAT,PECR,PEX11A,RPL12,RPS18,SCD,SERPINF1,SKP2,SND1,THRSP,UBE2L3,VNN1,YBX1	28 (12)	12		sirolimus		AMPK,FASN,FOS,Insulin,PPARA,SREBF1	ATG13,D-glucose,DDIT3
HSPA5	enzyme	1.05	1		-1.342	0.000775	HSPA5	BCL2L1,CPT1A,G6PC,ISG15,SCD	5 (1)	1	2-deoxyglucose,6-aminonicotinamide,benzyloxycarbonyl-Leu-Leu-Leu aldehyde,cadmium,CDKN1A,FOS,KRAS,methapyrilene,monorden,nitrofurantoin,oleic acid,OSU-CG12,palmitic acid,PRKACA,tanespimycin,TCR,troglitazone,YY1	ACOX1,bromobenzene,epigallocatechin-gallate,genistein,NFKBIA,selenium,sirolimus,TSC2,Ubiquitin		ACLY,FASN,Ins1,SREBF1,SREBF2	CDH1
GCK	kinase		1		-1	0.000777	GCK	CPT1A,G6PC,PDK2,SCD	4 (1)	1	ADIPOQ,carbohydrate,DL-fructose,IGF1R,Insulin,MLXIPL,MYC,PFKFB1,PRL,RICTOR,TO-901317,troglitazone	FGF19,GFPT1,L-triiodothyronine,palmitic acid,PPARA		2-deoxyglucose,ACLY,CDH1,FASN,glycogen
vanoxerine	chemical drug		2		-1.387	0.000839	FOS,SLC6A3,vanoxerine	FARS2,G6PC,KRT8,PSAP,RPL9,RPLP0,RPS18,RPS24,RPS6,RPS7,RPS9,SNAP23,VIM	13 (3)	2				FOS
GNPTAB	enzyme		1		1.414	0.000851	GNPTAB	GUSB,MANBA	2 (1)	1	genistein			GUSB
dextroamphetamine	chemical drug		2		-0.943	0.000858	dextroamphetamine,ERK,FOS,SLC6A2,SLC6A3	BCL2L1,BGN,FARS2,G6PC,ITGAV,KRT18,KRT8,PSAP,RPL9,RPLP0,RPS18,RPS24,RPS6,RPS7,RPS9,SNAP23,SPTBN1,VIM	18 (5)	4				FOS	Creb
bromobenzene	chemical toxicant		1		-1.342	0.000862	bromobenzene	BHMT,FMO3,RPL22,RPL28,RPL35	5 (1)	1				NQO1	HSPA5,Ldh (complex)
ARQ 087	chemical drug		2		0	0.000917	ARQ 087,FGFR1,FGFR2,FGFR3	BCL2L1,CTSC,CTSH,DCAF8,DDX25,EEF1A1,EIF4E,KRT1,RPS6,VIM	10 (4)	3					FGFR1
INCB054828	chemical drug		2		0	0.000917	FGFR1,FGFR2,FGFR3,INCB054828	BCL2L1,CTSC,CTSH,DCAF8,DDX25,EEF1A1,EIF4E,KRT1,RPS6,VIM	10 (4)	3					FGFR1
debio 1347	chemical drug		2		0	0.000917	debio 1347,FGFR1,FGFR2,FGFR3	BCL2L1,CTSC,CTSH,DCAF8,DDX25,EEF1A1,EIF4E,KRT1,RPS6,VIM	10 (4)	3					FGFR1
alvespimycin	chemical drug		2	Activated	2.183	0.000951	alvespimycin,EGFR,HSP90B1	ARG1,BCL2L1,COL6A2,EIF4E,KIAA0391,KRT17,NCL,NUTF2,RPL12,RPL27A,RPL30,RPLP2,RPS20,SCD,SKP2,SRSF1,VIM	17 (3)	3				HSPA1A/HSPA1B	CCND1,FASN,HSP90B1,SCAP,SREBF1,SREBF2
FBXW11	enzyme		2	Inhibited	-2.828	0.000995	FBXW11,GLI2,IFNAR1,NFKBIA	AK2,ARG1,BCL2L1,CTSZ,GM2A,ISG15,ITGAV,KRT1,KRT17,KRT18,KRT8,PLD3,RPL27A,RPL8,RPS18,RPS2,RPSA,SPTBN1	18 (4)	3	HRAS				NFKBIA
RSVA314	chemical reagent		2		0	0.000997	MTOR,PRKAA,RSVA314	BCL2L1,CNP,CPT1A,EIF3A,G6PC,RPL12,RPL23,RPS18,SKP2,SND1,VIM,YBX1	12 (3)	2				PRKAA
RSVA405	chemical reagent		2		0	0.000997	MTOR,PRKAA,RSVA405	BCL2L1,CNP,CPT1A,EIF3A,G6PC,RPL12,RPL23,RPS18,SKP2,SND1,VIM,YBX1	12 (3)	2				PRKAA
PRN1371	chemical drug		2		0	0.000999	FGFR1,FGFR2,FGFR3,FGFR4,PRN1371	BCL2L1,CTSC,CTSH,DCAF8,DDX25,EEF1A1,EIF4E,KRT1,RPS6,VIM	10 (5)	4					FGFR1
VHL	transcription regulator		1		0.816	0.00103	VHL	BCL2L1,FTL,MAVS,RPS6,SKP2,VIM	6 (1)	1	RBX1			CDH1,D-glucose,Focal adhesion kinase,TP53	CCND1,CDKN1A,EPO,FGFR1,PRKAA,PROK1
SLC13A5	transporter		2		0	0.00107	MTOR,PRKAA,SLC13A5	BCL2L1,CNP,CPT1A,EIF3A,G6PC,RPL12,RPL23,RPS18,SKP2,SND1,VIM,YBX1	12 (3)	2				ACLY,D-glucose,Ins1	CDKN1A,PRKAA
PBK	kinase		2		1.177	0.00109	Akt,Ap1,DUSP1,MAPK8,NFKBIA,P38 MAPK,PBK	AK2,ASS1,BGN,CPT1A,CTSZ,FDXR,FHIT,G6PC,GM2A,ISG15,ITGAV,KRT18,KRT6B,KRT8,MGLL,MVP,PEX11A,PLD3,RAB5A,RPL27A,RPL8,RPS18,RPS2,RPSA,SPTBN1,VNN1	26 (7)	6	ELAVL1	D-glucose,TP53		NFKBIA
mannitol	chemical - endogenous mammalian		2	Inhibited	-2.711	0.00111	Focal adhesion kinase,mannitol,MAPK14,NFKBIA,P38 MAPK,PRKAA	AK2,ASS1,BGN,CPT1A,CTSZ,FDXR,GM2A,ISG15,KRT18,KRT8,PLD3,PRDX1,RAB5A,RPL27A,RPL8,RPS18,RPS2,RPSA,SKP2,SPTBN1,Tpm1,VIM,YBX1	23 (6)	5				PRKAA	Focal adhesion kinase,NFKBIA
mimosine	chemical drug		2		-1.147	0.00112	CCND1,IKBKG,MDM2,mimosine,PLG	ARG1,BCLAF1,CTSZ,CYP2S1,EIF5,GM2A,ISG15,ITGAV,KRT1,LYZ,PCYT1A,PLD3,RAB5A,RALA,RPL10,RPL13,RPL27A,RPS6,TALDO1	19 (5)	4				CDKN1A,TP53	CCND1
OPRD1	G-protein coupled receptor		2		0.6	0.00114	AMPK,EGFR,MAP2K1,MAPK1,OPRD1,p70 S6k	ANPEP,ARG1,ARSB,COL6A2,CTNNA2,EEF1A1,EIF4E,G6PC,GUSB,ISG15,ITGAV,KIAA0391,KRT17,MVP,NCL,NUTF2,OAT,PLSCR1,PPT2,SCD,SKP2,SRSF1,SUOX,THRSP,YBX1	25 (6)	5	benzyloxycarbonyl-Leu-Leu-Leu aldehyde,NFKBIA	roscovitine		AMPK,Ldh (complex),MAPK3
rabeprazole	chemical drug		2		0.707	0.00114	bile acid,FGFR1,rabeprazole,SLC22A2	BCL2L1,CPT1A,DDX25,EEF1A1,EIF4E,FMO3,RPS6,VIM	8 (4)	3					FGFR1
PIK3R2	kinase		2		0.962	0.00116	Akt,CASP6,EIF4E,ERK,IRS2,MKNK1,NFKBIA,PIK3CD,PIK3R2	AK2,ARG1,BCL2L1,BCLAF1,BGN,CPT1A,CTSZ,DGUOK,FHIT,G6PC,GM2A,HRAS,Ighg2b,ISG15,ITGAV,KRT8,PLD3,RPL27A,RPL8,RPS18,RPS2,RPSA,SKP2,SPTBN1,THRSP,VIM,ZPR1	27 (9)	9		IL15		D-glucose,NFKBIA	IRS2
HSPH1	other		3		-1.512	0.00124	CFTR,estrogen receptor,HSPA8,HSPH1,MAPK1,MAPK14,MST1R,PI3K (complex),Ptk,PTK2,PTK2B,PTK6,RAC1,STAT	ANPEP,ARG1,ARSB,BCL2L1,COL6A2,CTNNA2,Cyp2c40 (includes others),FABP2,FADS2,FHIT,G6PC,G6PD,ISG15,ITGAV,KRT17,KRT18,KRT6B,KRT8,MVP,PLSCR1,PPT2,PRDX1,RPL23,SCD,SKP2,SUOX,Tpm1,VIM	28 (14)	11		TP53
Nisch	other		2		-0.832	0.00124	AMPK,MTOR,Nisch	BCL2L1,CNP,EIF3A,G6PC,OAT,RPL12,RPL23,RPS18,SKP2,SND1,THRSP,VIM,YBX1	13 (3)	3				MLXIPL,SREBF1	AMPK,FOS
NFKBIA	transcription regulator		1	Activated	2.84	0.0013	NFKBIA	AK2,BCL2L1,CTSZ,GM2A,ISG15,ITGAV,KRT18,KRT8,PLD3,RPL27A,RPL8,RPS18,RPS2,RPSA,SPTBN1	15 (1)	1	15-deoxy-delta-12,14 -PGJ 2,5-fluorouracil,carfilzomib,carrageenan,Chuk-Ikbkb-Ikbkg,ciprofibrate,CSNK2A1,D-glucose,GAB1,gamma-tocotrienol,gemfibrozil,HSPA1A/HSPA1B,Ins1,Insulin,KRAS,MAPK3,MUC1,N-nitro-L-arginine methyl ester,NCX-4040,nitrofurantoin,NQO1,PBK,PIK3R2,pirinixic acid,PPARA,PPARα-RXRα,RPS6KA2,S-nitrosoglutathione,S100A4,sirolimus,SPP1,TCR,TRAPPC9,troglitazone	5,8,11,14-eicosatetraynoic acid,Alpha catenin,alpha-pinene,arachidonic acid,arsenite,bardoxolone methyl,butylated hydroxyanisol,calpeptin,CAT,CD 437,COL4A3,CUL1,DNAJA3,epigallocatechin-gallate,FBXW11,genistein,HRAS,imatinib,L-triiodothyronine,linolenic acid,mannitol,mannosylated lipoarabinomannan,methotrexate,palmitic acid,PPP2R5C,PRKAA1,RAS,RBX1,Scf,sulindac sulfide,temozolomide,tempol,TO-901317…		ADAMTS5,CDH1,FOS,GADD45B,NAGLU,OPRD1,PRKACA,PTGS2	BOK,CCL11,CDKN1A,EPO,HSPA5,UBE3A
AMD1	enzyme		2		1.387	0.00132	AMD1,CCND1,MMP2,PLAU	ARG1,BCL2L1,BCLAF1,EIF5,ITGAV,KRT1,PCYT1A,RPL10,RPL13,RPL27A,RPS6,TALDO1,VIM	13 (4)	3	putrescine	methotrexate,nitrofurantoin		CCND1
OSU-CG12	chemical reagent		2		0.894	0.00137	AMPK,HDAC1,HDAC2,HDAC3,HDAC4,KDM1A,KDM5A,KDM5B,OSU-CG12	CXADR,ETNPPL,FABP2,FDXR,G6PC,ISG15,KRT18,KRT8,MIA3,MRPL55,NCL,OAT,RNASET2,SCD,SNRPD1,THRSP,Tpm1,TXN2,VIM,YBX1	20 (9)	8				AMPK,HSPA5	KDM1A
methotrexate	chemical drug		1	Inhibited	-2.53	0.00139	methotrexate	ACSS2,AGPAT3,ASS1,C8A,CPT1A,PCYT1A,PECR,PEX7,PRDX1,SCD	10 (1)	1				AMPK,CDH1,CDKN1A,FASN,GPAM,HSD17B4,PPARA,TP53	ACOX1,AMD1,APEX1,CCL11,CCND1,GSTA1,MAPK3,NFKBIA,NQO1,SPP1
PLCE1	enzyme		2		-1.3	0.00142	ERK1/2,HRAS,Ikb,Mapk,MAPK1,PLCE1,RELA	ANPEP,ARSB,BCL2L1,BHMT,COPB2,CTNNA2,GUSB,IGKC,ISG15,ITGAV,KRT17,KRT18,KRT6B,MVP,NLN,PCYT1A,PLSCR1,PPT2,RPL27A,RPL30,RPS10,RPS3,RPS6,SCO2,SUOX,TANK,Tpm4,VIM,VNN1	29 (7)	6	GNG13,Rap,RAP2B,RAPGEF3,RAS			Ikb,MAPK3,PTGS2
XBP1	transcription regulator		1	Inhibited	-2.53	0.00145	XBP1	COPB1,COPB2,MOGS,PCYT1A,Rrbp1,SCD,SEC61G,SEC63,STARD5,TRAM1	10 (1)	1	1,2-dithiol-3-thione,CDK5,HLA-B,HSPA1A/HSPA1B,IL15,Insulin,MAPK3,NFE2L2,palmitic acid	ACOX1,D-glucose,sirolimus		CAT,DNAJC3,FASN	IRS2,NFKBIA
FNIP1	other		2	Inhibited	-2.496	0.00145	AMPK,FNIP1,MTOR,RPS6KB1	CNP,EIF3A,G6PC,ISG15,OAT,RPL12,RPL23,RPS18,SKP2,SND1,THRSP,VIM,YBX1	13 (4)	3					AMPK
creatine kinase	group		3		0	0.00145	Akt,AMPK,Ap1,creatine,creatine kinase,Jnk,MAP3K1,MAP4K4,MAPK8,MAPK9,MTOR,p70 S6k,stavudine	AGPAT3,CNP,CPT1A,DHRS4,EEF1A1,EIF3A,EIF4E,FHIT,KRT6B,MAN2B2,MGLL,MVP,NCL,OAT,PEX11A,PEX19,PLSCR1,PRDX1,RPL12,RPL23,RPS18,SKP2,SND1,THRSP,VIM,YBX1	26 (13)	11	D-glucose,TRH	AMPK,genistein,ochratoxin A,S-nitrosoglutathione,sirolimus,TP53		stavudine
SPP1	cytokine		1		-0.333	0.00148	SPP1	ARG1,BCL2L1,EPDR1,GPX4,ITGAV,KRT18,SELENOW,SERPINF1,VIM	9 (1)	1	4-aminophenol,AGT,cAMP-dependent protein kinase,CCND1,ciprofloxacin,EPO,genistein,GIP,HRAS,MAPK3,nitrofurantoin,phenacetin,PRL,RAPGEF3,TCR,USF2	15-deoxy-delta-12,14 -PGJ 2,ADA,DNAJB6,ING1,methotrexate,NT5E,tempol,troglitazone		CDKN1A,Ins1,NFKBIA,PTGS2,SNAI1	ADIPOQ,CDH1,Creb,MYC,RAC1
mir-194	microRNA		2		0	0.00148	BBC3,CDKN1A,mir-194	BCL2L1,GLB1,ITGAV,KRT18,PRDX1,PSAP,VIM,YBX1	8 (3)	2				CDKN1A	PLAUR,RAC1,RAP2B
FGF9	growth factor		2		0.186	0.00149	Akt,ERK1/2,FGF9,FGFR1,FGFR2,MAPK1,MTOR,RPS6KB1	ANPEP,ARSB,BCL2L1,BHMT,CNP,CPT1A,CTNNA2,CTSC,CTSH,DDX25,EEF1A1,EIF3A,EIF4E,FHIT,ITGAV,KRT1,KRT17,MVP,PLSCR1,PPT2,RPL12,RPL23,RPS18,RPS6,SKP2,SND1,SUOX,VIM,VNN1	29 (8)	7		sirolimus		CCND1,FGFR1,MAPK3	pregnenolone
vinorelbine	chemical drug		2		-1.807	0.00149	AMPK,STK11,vinorelbine	ACP6,AK2,ASS1,BCL2L1,EIF3A,G6PC,OAT,SARDH,STARD10,TALDO1,THRSP,TKT,TXNRD1,VIM,YBX1	15 (3)	3					AMPK
GSK3052230	biologic drug		2		0.378	0.00149	FGFR1,FGFR3,FGFR4,GSK3052230	BCL2L1,DCAF8,DDX25,EEF1A1,EIF4E,RPS6,VIM	7 (4)	3					FGFR1
EDNRA	transmembrane receptor		2	Inhibited	-2.065	0.00153	EDNRA,Focal adhesion kinase,GNAI1,MAPK1,PI3K (complex)	ANPEP,ARSB,BCL2L1,CTNNA2,FHIT,G6PC,G6PD,ISG15,ITGAV,KRT17,KRT18,KRT8,MVP,PLSCR1,PPT2,RPL23,SKP2,SUOX,VIM	19 (5)	4	AGT,CDKN1A,HOXA7	TP53			Focal adhesion kinase
GP130-LIFR	complex		2		-0.447	0.00155	GAB1,GP130-LIFR,JAK	ARG1,BCL2L1,HRAS,ISG15,VIM	5 (3)	2				GAB1,JAK
KRT14	other		1		0	0.00168	KRT14	KRT1,KRT5	2 (1)	1	CCND1,MYC,PRL,RAC1,TFAP2A,TRH,TSH	Focal adhesion kinase,genistein,TP53,troglitazone
LARP1	translation regulator		1		1.414	0.00168	LARP1	RPS20,RPS6	2 (1)	1	CSNK2A1
TR-RXR	complex		1		1.414	0.00168	TR-RXR	G6PC,THRSP	2 (1)	1
fructose-1,6-diphosphate	chemical - endogenous mammalian		2		-0.853	0.00175	EGFR,fructose-1,6-diphosphate,NOS2,P38 MAPK	ARG1,ASS1,BCL2L1,BGN,COL6A2,CTSC,EIF4E,FDXR,G6PC,G6PD,ISG15,ITGAV,KIAA0391,KRT17,NCL,NUTF2,PLSCR1,RAB5A,SKP2,SRSF1,TKT,VIM	22 (4)	3	PFKFB1
masitinib	chemical drug		2		-0.816	0.00184	FGFR3,Focal adhesion kinase,masitinib,Pdgfr	BCL2L1,DCAF8,KRT18,KRT8,SKP2,VIM	6 (4)	3					Focal adhesion kinase
PPP2R1B	phosphatase		2		-1.342	0.00185	ACACA,PPP2R1B,PRKAA	CPT1A,G6PC,SCD,VIM,YBX1	5 (3)	2		ING1			PRKAA
FOS	transcription regulator		1		-1.155	0.00188	FOS	FARS2,G6PC,KRT8,RPL9,RPLP0,RPS18,RPS24,RPS6,RPS7,RPS9,SNAP23,VIM	12 (1)	1	15-deoxy-delta-12,14 -PGJ 2,2-deoxyglucose,3-methylcholanthrene,8-bromoguanosine 3',5'-cyclic monophosphate,arachidonic acid,arsenite,benzyloxycarbonyl-Leu-Leu-Leu aldehyde,butylated hydroxyanisol,cAMP-dependent protein kinase,carrageenan,CD 437,CDKN1A,cocaine,Creb,CSF2RB,cyclooxygenase,D-glucose,dextroamphetamine,EPHB1,EPO,FGF19,GCG,genistein,GIP,HRAS,HSPA1A/HSPA1B,IGF1R,IL16,Ins1,Insulin,IRS2,K…	amino acids,benzyl isothiocyanate,docosahexaenoic acid,epigallocatechin-gallate,FAAH,harmine,IL15,irbesartan,KCNA3,L-triiodothyronine,MYC,Nisch,PTPN2,Rar,Scf,SH2B2,sirolimus,tamsulosin,troglitazone,TSC2,xanthohumol,YY1		CCND1,FASN,HSP90B1,HSPA5,LGALS3,PLAUR,PPP2R2A,SEMA3E,SNAI1	NFE2L2,NQO1
EHHADH	enzyme	-1.294	1		1.732	0.00189	EHHADH	ACOT2,MGLL,PEX11A	3 (1)	1	ciprofibrate,gemfibrozil,pirinixic acid,SCAP,SREBF1	ELOVL5,Ins1,L-triiodothyronine,methapyrilene,nitrofurantoin			FASN
PK 11195	chemical drug		2		1.667	0.00191	NR1I2,NR1I3,PK 11195	BHMT,CPOX,CPT1A,G6PC,GUSB,Mup1 (includes others),Nat8f2,SCD,THRSP	9 (3)	2
METAP2	peptidase		2		0	0.00198	CASP3,CDK5,EIF2AK2,EIF2S1,METAP2	ARG1,BCL2L1,GLB1,HRAS,ISG15,KCNMA1,PLSCR1,RALA	8 (5)	4	MYC			CDK5
HRAS	enzyme	1.57	1		-1.941	0.00201	HRAS	BCL2L1,COPB2,GUSB,IGKC,KRT18,NLN,PCYT1A,RPL27A,RPL30,RPS10,RPS3,RPS6,Tpm4	13 (1)	1	AGT,BAIAP3,CCL11,diethylnitrosamine,Ephb,EPHB1,EPO,GAB1,Grb2-Shc1-Sos,Ins1,Insulin,KNDC1,NF1,PIK3CB,RAP2B,RAPGEF3,S-nitrosoglutathione,SH2B2,Sos,SYNGAP1,TCR,Trk Receptor,TSH	AMPK,DOK1,Eph Receptor,EPHB2,irbesartan,methyl-beta-cyclodextrin,PRKAA1,RAP1GAP,RASA1		CCND1,Cdc42,CDH1,CDKN1A,DDIT3,FASN,FBXW11,FOS,IGF1R,KRAS,MAPK12,MAPK3,PLAUR,PRL,PTGS2,PTK2,SERPINB2,SPP1,SREBF1	GUSB,miR-542-3p (miRNAs w/seed GUGACAG),NFKBIA,SNAI1
pirinixic acid	chemical toxicant		1	Inhibited	-3.207	0.00202	pirinixic acid	ACOT2,ACOT4,ACSS2,CPT1A,ELOVL5,FADS2,G6PC,G6PD,MGLL,Mup1 (includes others),PEX11A,PSMA1,SCD,TALDO1	14 (1)	1				8-oxo-7-hydrodeoxyguanosine,ACOX1,CAT,CCND1,CDKN1A,CYP1A1,EHHADH,ELOVL5,FABP1,FASN,GADD45B,HSD17B4,LGALS3,MAPK3,MYC,NFKBIA,PPARA,PRL,PTGS2,TP53	D-glucose,Mup1 (includes others),NQO1,SREBF1
PDC	other		2		0.943	0.00218	AKT1,MAPK1,PDC	ANPEP,ARSB,ASS1,BCL2L1,Ces1b/Ces1c,CTNNA2,G6PC,ISG15,ITGAV,KRT17,MVP,PEX11A,PLSCR1,PPT2,SERPINF1,SUOX,UBE2L3,VIM	18 (3)	2	cAMP-dependent protein kinase,PRKACA
HSP90B1	other	-1.011	1	Inhibited	-2.236	0.00219	HSP90B1	RPL12,RPL27A,RPL30,RPLP2,RPS20	5 (1)	1	1,2-dithiol-3-thione,2-deoxyglucose,benzyloxycarbonyl-Leu-Leu-Leu aldehyde,carfilzomib,FOS,monorden,NFE2L2,tanespimycin,TCR	alvespimycin,sirolimus,Ubiquitin
CCND1	transcription regulator		1	Activated	2.53	0.0022	CCND1	BCLAF1,EIF5,ITGAV,KRT1,PCYT1A,RPL10,RPL13,RPL27A,RPS6,TALDO1	10 (1)	1	3-methylcholanthrene,AGT,Aldose Reductase,AMD1,arsenite,benzyloxycarbonyl-Leu-Leu-Leu aldehyde,cadmium,CDK4/6,clotrimazole,Creb,CSNK2A1,CYP1A1,D-glucose,diethylnitrosamine,ELAVL1,FGF19,FGF9,FOS,gemfibrozil,genistein,GPI,HRAS,Ikb,IL15,Ins1,Insulin,IRS2,KRAS,L-triiodothyronine,LGALS3,LRP6,MAPK11,MAPK3,methapyrilene,MSH2,MST1R,MUC1,MYCN,nitrofurantoin,NQO1,pirinixic acid,PLAUR,PPP1R1B,PRKACA,PRKCH,P…	15-deoxy-delta-12,14 -PGJ 2,2-deoxyglucose,5-fluorouracil,ADIPOQ,alvespimycin,BANP,bardoxolone methyl,CAMK2N2,CUL1,dehydroepiandrosterone sulfate,epigallocatechin-gallate,gamma-tocotrienol,GSI34,imatinib,MAPK12,methotrexate,methyl-beta-cyclodextrin,mimosine,NF1,PML,RAP1GAP,RBM14,roscovitine,salinomycin,SGI 1776,sirolimus,SNAI1,sulindac sulfide,tanespimycin,TO-901317,troglitazone,TXNIP,Ubiquitin,V…		HSPA1A/HSPA1B,KRT14,MAFF,QKI,SPP1	CDK5,TSC2,ZNF148
MDM4	enzyme		1		1.732	0.0023	MDM4	KRT5,KRT8,VIM	3 (1)	1					CDKN1A,LGALS3
CEP-37440	chemical drug		2		-1	0.00253	ALK,CEP-37440,Focal adhesion kinase	BCL2L1,KRT18,KRT8,SKP2	4 (3)	2					Focal adhesion kinase
N-cor	group		1	Activated	2	0.00253	N-cor	ELOVL5,FADS2,G6PD,SCD	4 (1)	1	benzyloxycarbonyl-Leu-Leu-Leu aldehyde,CSNK2A1	NCOR1			ADIPOQ,CDKN1A,CXCL14,docosahexaenoic acid,ELOVL5,FASN,PPARA,Rar,SREBF1
TRAP1	enzyme	1.152	1		0	0.00253	TRAP1	EARS2,GARS,MAVS,TXN2	4 (1)	1	MYC	monorden,TP53			PTGS2
putrescine	chemical - endogenous mammalian		2		0.243	0.00322	Cdc42,CDK2,MAPK1,putrescine,RAC1,RHOA	ANPEP,ARSB,BCL2L1,CTNNA2,CTSA,CTSH,CTSZ,ISG15,ITGAV,KRT17,KRT6B,MVP,PCYT1A,PLSCR1,PPT2,SUOX,VIM	17 (6)	5		2-deoxyglucose,sirolimus		AMD1,Cdc42,FOS,RAC1,TP53	CDKN1A,MAPK3
USF2	transcription regulator		2		-1.941	0.00332	CFTR,Tgf beta,USF2	BCL2L1,BGN,Cyp2c40 (includes others),EIF4E,FABP2,FADS2,GUSB,Ighg2b,KRT1,KRT72,SCD,THRSP,VIM	13 (3)	3	GFPT1	benzyloxycarbonyl-Leu-Leu-Leu aldehyde,HINT1		AGT,CFTR,FASN,MYC,SPP1
CDKN1A	kinase		1		0.378	0.00333	CDKN1A	BCL2L1,GLB1,ITGAV,KRT18,PSAP,VIM,YBX1	7 (1)	1	(diaminocyclohexane)(diacetato)(dichloro)platinum,15-deoxy-delta-12,14 -PGJ 2,2-deoxyglucose,3-deazaneplanocin,5-fluorouracil,8-bromoguanosine 3',5'-cyclic monophosphate,acadesine,ADIPOQ,AGT,ALOX5,AMPK,arsenite,BANP,benzyloxycarbonyl-Leu-Leu-Leu aldehyde,BLM,cadmium,CAMK2N2,CD 437,D-glucose,DMTF1,docosahexaenoic acid,doxifluridine,ELAVL1,EPO,FGFR1,GADD45B,genistein,HRAS,HUWE1,idarubicin,IGF1R,ING…	ACOX1,AURK,CAT,CDK5,CKS1B,CUL1,dactolisib,diethylnitrosamine,Focal adhesion kinase,GALR2,HSPA1A/HSPA1B,IL15,Ins1,KDM1A,MDM4,mir-7,N-cor,NCOR1,NELFB,NFKBIA,PRL,putrescine,RNF2,roscovitine,Scf,SGI 1776,sirolimus,SLC13A5,SNAI1,tanespimycin,UBE3A,VHL,YY1,ZNF148		EDNRA,FOS,HSPA5,NFE2L2	MAP3K5
citrulline	chemical - endogenous mammalian		2		1.342	0.00348	arginase,citrulline,PRKAA	ARG1,CPT1A,G6PC,VIM,YBX1	5 (3)	2		N-nitro-L-arginine methyl ester		PRKAA
TO-901317	chemical reagent		1		-1.414	0.00368	TO-901317	ASS1,BCL2L1,CPT1A,FADS2,G6PC,G6PD,SCD,SKP2	8 (1)	1				ACLY,ARG2,FASN,GCK,GPAM,Insulin,MLXIPL,SREBF1	ACOX1,CCND1,D-glucose,LGALS3,NFKBIA,PTGS2
AZD6482	chemical drug		2		-0.258	0.00375	AKT1,AZD6482,MTOR	ASS1,BCL2L1,Ces1b/Ces1c,CNP,EIF3A,G6PC,PEX11A,RPL12,RPL23,RPS18,SERPINF1,SKP2,SND1,UBE2L3,VIM	15 (3)	2
GNRH2	other		1		0	0.00411	GNRH2	RPLP2,RPSA	2 (1)	1
GPAM	enzyme	-1.09	1		0	0.00411	GPAM	G6PC,SCD	2 (1)	1	ACLY,FABP1,FASN,Insulin,methotrexate,PML,SCAP,SREBF1,TO-901317	acadesine,ELOVL5,INSIG2,PRKAA1,sterol,troglitazone
GSI34	chemical reagent		1		1.414	0.00411	GSI34	BCL2L1,RPS6	2 (1)	1					CCND1
HMG20A	transcription regulator		1		1.414	0.00411	HMG20A	CXADR,KRT18	2 (1)	1				SNAI1	CDH1
OBP2B	transporter		1		0	0.00411	OBP2B	CPT1A,SCD	2 (1)	1	RICTOR				D-glucose,FASN,MLXIPL,SREBF1
etretinate	chemical drug		1		0	0.00411	etretinate	KRT1,KRT18	2 (1)	1				CAT
lestaurtinib	chemical drug		1		1.414	0.00411	lestaurtinib	BCL2L1,LYZ	2 (1)	1				CEBPE
taspoglutide	biologic drug		1		0	0.00411	taspoglutide	CPT1A,FABP2	2 (1)	1					FABP1
sargramostim	biologic drug		2		0	0.00419	CSF2RA,CSF2RB,p70 S6k,sargramostim	BCL2L1,EEF1A1,SCD,SNAP23	4 (4)	4				CSF2RB
amino acids	chemical - endogenous mammalian		1		-0.577	0.00445	amino acids	RPS20,RPS6,SLC7A2	3 (1)	1				AMPK,ELAVL1,nitrofurantoin,RICTOR,RPS6KB2,SREBF2	D-glucose,DDIT3,FOS,MAPK3,TSC2
irbesartan	chemical drug		1		-1.732	0.00445	irbesartan	HRAS,ITGAV,SERPINF1	3 (1)	1				ADIPOQ	FOS,HRAS,PTGS2
PML	transcription regulator		1		1.89	0.00462	PML	CPT1A,FTL,LYZ,PRDX1,SCD,TXN2,TXNRD1	7 (1)	1	CSNK2A1,RAS,sirolimus	RBX1,UBE3A		CDKN1A,CEBPE,DNAJB6,GPAM,Inflammasome (Nalp3, Asc, Casp1),MAFF,PIK3CB,Rar	ADIPOQ,AMPK,CAT,CCND1,FABP1,FASN,MAPK11,NFE2L2,NQO1,PRKCH,SREBF1,SREBF2
BOK	other		2		1.155	0.00463	ATF4,BOK,CASP3,DDIT3,ERN1	BCL2L1,CPOX,GARS,HDLBP,KRT6B,SCD,SERPINF1,SKP2,SRSF1,SRSF6,TKT,VIM	12 (5)	4	AGT,TP53	NFKBIA,PRL,TFAP2A		DDIT3,ITPR3
(Z)-5-(3-trifluoromethylbenzylidene)thiazolidine-2,4-dione	chemical reagent		2		0.378	0.00484	(Z)-5-(3-trifluoromethylbenzylidene)thiazolidine-2,4-dione,PIM1,PRKAA	BCL2L1,CPT1A,G6PC,GLB1,SKP2,VIM,YBX1	7 (3)	2				PRKAA
PRKAA	group		1		1	0.00503	PRKAA	CPT1A,G6PC,VIM,YBX1	4 (1)	1	(Z)-5-(3-trifluoromethylbenzylidene)thiazolidine-2,4-dione,2-deoxyglucose,ADIPOQ,C1QL3,citrulline,GFPT1,Insulin,ITPR3,L-triiodothyronine,mannitol,MYC,policosanol,PRKAA1,PTGS2,RSVA314,RSVA405,troglitazone	AGT,CAT,ELOVL5,palmitic acid,phosphocreatine,PPP2CB,PPP2R1B,RAS,SLC13A5,VHL		ACOX1,CDH1,CDKN1A,PPP2R5C	FASN,PRKACA,SNAI1,SREBF1,TSC2
SNAI1	transcription regulator		1		1.342	0.00524	SNAI1	BCL2L1,CXADR,KRT17,KRT18,KRT8	5 (1)	1	CSNK2A1,FOS,GPI,HMG20A,IGF1R,KDM1A,PLAUR,PTGS2,PTK2,RAS,SPP1,TP53	Alpha catenin,AMPK,dactolisib,epigallocatechin-gallate,HRAS,mir-7,PRKAA,PTPN23			ADIPOQ,CCND1,CDH1,CDKN1A,FASN,MLXIPL
arachidonic acid	chemical - endogenous mammalian		1		1.633	0.00533	arachidonic acid	FADS2,G6PD,SCD,SRSF3,THRSP,VIM	6 (1)	1	10-shogaol,ADORA1,ELOVL5,MYC,PRL,TRH,Zingiber officiale ginger extract	CFTR,HINT1,sirolimus		ACOX1,ALOX5,EPHB1,FABP1,Focal adhesion kinase,FOS,MAPK3,NFE2L2,PPARA,PTGS2,TP53,TSH	ELOVL2,FASN,INSIG2,NFKBIA,palmitic acid,SREBF1
sulindac sulfide	chemical drug		1		-0.447	0.00559	sulindac sulfide	BCL2L1,ETNPPL,GARS,NUTF2,SPTBN1	5 (1)	1				CYP1A1,NQO1,PTGS2,RAP1GAP	ALOX5,CCND1,MAPK3,NFKBIA,PPP2R2A,RAS
ACLY	enzyme	-1.308	1		0	0.0057	ACLY	ACSS2,SCD	2 (1)	1	ADIPOQ,carbohydrate,D-glucose,GCK,HSPA5,Insulin,MLXIPL,PCGEM1,SCAP,SLC13A5,SREBF1,SREBF2,Srebp,TO-901317	cAMP-dependent protein kinase,FGF19,Ins1,INSIG2,IRS2,monorden,palmitic acid,sterol,TP53		GPAM
RPS6KB2	kinase		1		-1.414	0.0057	RPS6KB2	BCL2L1,ISG15	2 (1)	1	amino acids,Ins1	sirolimus		EIF4B	glycogen,TP53
miR-338-3p (miRNAs w/seed CCAGCAU)	mature microRNA		1		0	0.0057	miR-338-3p (miRNAs w/seed CCAGCAU)	Tpm1,VIM	2 (1)	1
fibric acid derivative	chemical drug		1		-1.732	0.00587	fibric acid derivative	ABCD2,FADS2,SCD	3 (1)	1				Ikb,PPARA	FASN
cadmium	chemical toxicant		1		-0.447	0.00595	cadmium	BCL2L1,G6PC,HNRNPK,PECR,SERPINF1	5 (1)	1				CCND1,CDKN1A,HSPA5,MYC,NFE2L2,PTGS2,TP53	CAT,EPO,Ldh (complex)
E platinum	chemical reagent		2		0	0.00611	E platinum,MTOR,p70 S6k	BCL2L1,CNP,EEF1A1,EIF3A,RPL12,RPL23,RPS18,SCD,SKP2,SND1	10 (3)	2
polyamines	chemical - other		2		1.698	0.00625	Akt,AKT1,Cdc42,EIF2S1,Focal adhesion kinase,polyamines,RAC1	ASS1,Ces1b/Ces1c,CPT1A,CTSA,CTSH,CTSZ,FHIT,G6PC,HRAS,KRT18,KRT6B,KRT8,PEX11A,SERPINF1,SKP2,UBE2L3,VIM	17 (7)	6				Cdc42,Focal adhesion kinase,RAC1	DDIT3
SLC15A4	transporter		2		0	0.0063	MTOR,p70 S6k,SLC15A4	BCL2L1,CNP,EEF1A1,EIF3A,RPL12,RPL23,RPS18,SCD,SKP2,SND1	10 (3)	2
camostat	chemical drug		2	Activated	2.111	0.00684	camostat,PLG,Tgf beta	ARG1,BCL2L1,BGN,CYP2S1,GUSB,Ighg2b,KRT1,KRT72,RAB5A,RALA,VIM	11 (3)	2
diethylnitrosamine	chemical toxicant		1		-0.447	0.00713	diethylnitrosamine	KRT8,Mup1 (includes others),OAT,PLSCR1,Rpl36	5 (1)	1	coumarin			CCND1,CYP,HRAS,MYC	CDKN1A,Mup1 (includes others)
3,5-L-diiodothyronine	chemical - endogenous mammalian		1		0	0.00751	3,5-L-diiodothyronine	CPT1A,SCD	2 (1)	1
HINT1	enzyme	-1.084	1		1.414	0.00751	HINT1	ELOVL5,FADS2	2 (1)	1	8-bromoguanosine 3',5'-cyclic monophosphate,L-triiodothyronine,Ngf			sphingomyelin,TP53	arachidonic acid,cerebroside 3-sulfate,docosahexaenoic acid,ELOVL5,USF2
TRIB1	kinase		1		0	0.00751	TRIB1	CPT1A,SCD	2 (1)	1				ACOX1	FASN
oleoylethanolamide	chemical - endogenous mammalian		1		0	0.00751	oleoylethanolamide	BCL2L1,CPT1A	2 (1)	1	ARN2508,FABP1			FOS,PPARA
HSD17B4	enzyme	-1.354	1		1.732	0.00752	HSD17B4	ACOT2,MGLL,PEX11A	3 (1)	1	CFTR,ciprofibrate,methotrexate,pirinixic acid,PPARA	Ins1,nitrofurantoin			ACOX1,FASN,PTGS2
sterol	chemical - endogenous mammalian		1		1.732	0.00752	sterol	ABCD2,ACSS2,PCYT1A	3 (1)	1	L-triiodothyronine	INSIG2		FASN,SREBF2	ACLY,GPAM,SCAP
idarubicin	chemical drug		2		0.333	0.00756	26s Proteasome,idarubicin,p70 S6k,PLA2G6	ARG1,BCL2L1,CENPE,CTSA,EEF1A1,FDXR,PSAP,SCD,VIM	9 (4)	4				CDKN1A,TP53
Tsc1-Tsc2	complex		2		-0.632	0.0077	MTOR,MTORC2,RHEB,Tsc1-Tsc2	BCL2L1,CNP,EIF3A,ISG15,RPL12,RPL23,RPS16,RPS18,SKP2,SND1	10 (4)	3	AMPK
PF-562271	chemical drug		2		0	0.00825	BCL2L1,Focal adhesion kinase,MCL1,PF-562271,PTK2B	BCL2L1,COL6A2,KRT18,KRT8,SKP2,TPT1	6 (5)	4					Focal adhesion kinase
troglitazone	chemical drug		1		-0.905	0.00842	troglitazone	ABCD2,ACOT2,AK2,BCL2L1,FADS2,KRT13,PEX11A,SCD,SKP2,TALDO1,THRSP	11 (1)	1				ADIPOQ,AGT,AMPK,CAT,CDK5,CDKN1A,DDIT3,FASN,GCK,GSTA1,HSPA5,MLXIPL,NFKBIA,NR2F2,NRIP1,PIK3CB,PPARA,PRKAA,QKI,TP53	CCND1,CDH1,Creb,D-glucose,FOS,GPAM,Ins1,KRT14,MUC1,MYC,palmitic acid,PTGS2,SPP1
FGF19	growth factor		1		0.577	0.00844	FGF19	BCL2L1,SCD,THRSP	3 (1)	1		FABP1		CCND1,FGFR1,FOS,PRL	ACLY,D-glucose,FASN,GCK,SREBF1
CYC065	chemical drug		2		0.447	0.00847	CDK2,CDK5,CDK9,CYC065	G6PD,GLB1,KCNMA1,PCYT1A,RALA	5 (4)	3					CDK5
NT5C1A	phosphatase		2	Inhibited	-2.449	0.00863	ACACA,AMPK,NT5C1A	G6PC,OAT,SCD,THRSP,VIM,YBX1	6 (3)	2					AMPK
HSF2	transcription regulator		2		-0.333	0.00935	26s Proteasome,CDK5,HSF2	ARG1,CENPE,CTSA,GLB1,KCNMA1,PSAP,PSMA1,RALA,VIM	9 (3)	3	benzyloxycarbonyl-Leu-Leu-Leu aldehyde			CDK5
carbohydrate	chemical - endogenous mammalian		1		-1.732	0.00943	carbohydrate	CPT1A,G6PC,SCD	3 (1)	1				ACLY,D-glucose,FASN,GCK,Insulin,SREBF1
linolenic acid	chemical - endogenous mammalian		1		1.732	0.00943	linolenic acid	ABCD2,G6PC,THRSP	3 (1)	1				CAT,FABP1,Ins1,ITGA2B,oleic acid,palmitic acid	FASN,NFKBIA
6-aminonicotinamide	chemical reagent		1		1.414	0.00955	6-aminonicotinamide	G6PC,G6PD	2 (1)	1				HSPA5	PRL
MSH2	enzyme		1		-1.414	0.00955	MSH2	Ighg2b,IGKC	2 (1)	1	MAP3K5,MYC			CCND1
Mup1 (includes others)	other	-2.046	1		1.414	0.00955	Mup1 (includes others)	G6PC,SCD	2 (1)	1	ACOX1,L-triiodothyronine,ZHX2	ciprofibrate,diethylnitrosamine,pirinixic acid,PPARA			D-glucose,FASN,MLXIPL
PRKCH	kinase	-1.044	1		1.414	0.00955	PRKCH	KRT1,KRT5	2 (1)	1	ingenol mebutate	PML		CCND1,CDKN1A
SIK1/SIK1B	kinase		1		1.414	0.00955	SIK1/SIK1B	SCD,THRSP	2 (1)	1	cocaine				FASN,SREBF1
THOC5	other		1		1.414	0.00955	THOC5	COX20,CPOX	2 (1)	1	CSNK2A1
ZNF148	transcription regulator		1		1.414	0.00955	ZNF148	BCL2L1,VIM	2 (1)	1		CCND1,CDK4/6,mir-144,mir-451		TP53	CDKN1A
miR-142-3p (and other miRNAs w/seed GUAGUGU)	mature microRNA		1		1.414	0.00955	miR-142-3p (and other miRNAs w/seed GUAGUGU)	BCL2L1,BCLAF1	2 (1)	1		TP53
sphingomyelin	chemical - endogenous mammalian		1		1.414	0.00955	sphingomyelin	ELOVL5,SCD	2 (1)	1	HINT1	palmitic acid			CFTR,ELOVL5,FASN,SREBF1
mir-7	microRNA		2		0.378	0.00967	EIF4E,mir-7	BCL2L1,BCLAF1,DGUOK,EIF4E,HRAS,SKP2,ZPR1	7 (2)	2	AGT,cocaine,MYC				CDKN1A,IGF1R,SNAI1
KDM1A	enzyme		1		0.447	0.00997	KDM1A	CXADR,KRT18,KRT8,NCL,SCD	5 (1)	1		OSU-CG12		CDH1,FASN,SNAI1,SREBF1	AGT,ARHGDIB,CDKN1A
triciribine phosphate	chemical drug		2		1.265	0.0101	AKT1,AKT2,AKT3,triciribine phosphate	ASS1,BCL2L1,Ces1b/Ces1c,G6PC,PEX11A,RPS6,SERPINF1,TOMM70,UBE2L3,VIM	10 (4)	3					AKT3
Focal adhesion kinase	group		1		1.732	0.0105	Focal adhesion kinase	KRT18,KRT8,SKP2	3 (1)	1	ANK2,arachidonic acid,CA3,CDK5,EPHB2,GNA12,IGF1R,MYCN,NT5E,oleic acid,polyamines,Rap,VHL	benzyloxycarbonyl-Leu-Leu-Leu aldehyde,CDH1,CEP-37440,EDNRA,genistein,LILRB1,mannitol,masitinib,MUC1,PF-562271,sirolimus,UBE2H		MAPK3,RAC1,RAS	CDKN1A,KRT14
MLXIPL	transcription regulator		1		-1.732	0.0105	MLXIPL	CPT1A,G6PC,SCD	3 (1)	1	Insulin,L-triiodothyronine,Nisch,TO-901317,troglitazone	AMPK,docosahexaenoic acid,ELOVL5,Mup1 (includes others),nicotinic acid,OBP2B,oleic acid,palmitic acid,SNAI1		ACLY,FASN,GCK,TXNIP	glycogen,Ins1,PPARA,TP53
SERPINB2	other		2		1.89	0.0112	PLAT,PLAU,PLG,SERPINB2	ARG1,CYP2S1,ITGAV,MVP,RAB5A,RALA,VIM	7 (4)	3	AGT,CEBPE,D-glucose,HRAS,TP53
oleic acid	chemical - endogenous mammalian		1		0.816	0.0112	oleic acid	ARG1,FABP2,G6PC,PLIN3,SCD,THRSP	6 (1)	1	acadesine,linolenic acid	ELOVL5		Creb,EPO,FABP1,FASN,Focal adhesion kinase,FOS,glycogen,HSPA5,Ins1,Ldh (complex),PPARA	ALOX5,FAAH,GADD45B,Insulin,IRS2,MLXIPL,PRKAA1,PTGS2,TXNIP
GSK690693	chemical drug		2		1.265	0.0115	AKT1,AKT2,AKT3,GSK690693	ASS1,BCL2L1,Ces1b/Ces1c,G6PC,PEX11A,RPS6,SERPINF1,TOMM70,UBE2L3,VIM	10 (4)	3				IGF1R	AKT3
FGFR1	kinase		1		-0.447	0.0116	FGFR1	DDX25,EEF1A1,EIF4E,RPS6,VIM	5 (1)	1	FGF19,FGF3,FGF6,FGF9,L-triiodothyronine	ARQ 087,debio 1347,GSK3052230,INCB054828,pazopanib,PRN1371,rabeprazole,VHL		CDKN1A,Creb,MAPK3,PLAUR,PTGS2,RAS
CDK5	kinase		1		0.577	0.0128	CDK5	GLB1,KCNMA1,RALA	3 (1)	1	cocaine,D-glucose,HSF2,METAP2,troglitazone	CCND1,CYC065,roscovitine		Focal adhesion kinase,Ins1,NFAT5,PPP1R1B,SYNGAP1,TP53,XBP1	CDKN1A,RAC1
ELOVL5	enzyme	-1.527	1		1.732	0.0128	ELOVL5	FADS2,G6PC,SCD	3 (1)	1	nicotinic acid,pirinixic acid,PPARA	HINT1,N-cor,sphingomyelin		arachidonic acid,docosahexaenoic acid,glycogen,RICTOR	D-glucose,EHHADH,ELOVL2,FASN,GPAM,INSIG2,MLXIPL,oleic acid,palmitic acid,PRKAA,SREBF1
selenium	chemical drug		1		-0.577	0.0128	selenium	GPX4,SELENOW,TXNRD1	3 (1)	1	LRP8			CAT,CDKN1A	ALOX5,HSPA5,PTGS2
SCAP	other		1	Inhibited	-2	0.0132	SCAP	ACSS2,FADS2,SCD,TMEM97	4 (1)	1		alvespimycin,sterol		ACLY,EHHADH,FASN,GPAM,REG1A,SREBF1,SREBF2
LRP6	transmembrane receptor		1		0.577	0.014	LRP6	G6PC,KRT18,VIM	3 (1)	1	Ins1,MAPK11,MAPK3	salinomycin		CCND1,D-glucose,MYC	PRLR
IL16	cytokine		1		-1.414	0.0143	IL16	BCL2L1,SKP2	2 (1)	1	IGF1R,TCR	sirolimus,TP53		FOS
MAFF	transcription regulator		1		-1.414	0.0143	MAFF	MOGS,TXNRD1	2 (1)	1	CCND1,NFE2L2,PML			NQO1
PAX4	transcription regulator		1		-1.414	0.0143	PAX4	BCL2L1,VIM	2 (1)	1	D-glucose,GCG			MYC
PIK3R2	kinase		1		-1.414	0.0143	PIK3R2	BCL2L1,ISG15	2 (1)	1		IL15		D-glucose,NFKBIA	IRS2
amiloride	chemical drug		1		0	0.0143	amiloride	BCL2L1,SRSF3	2 (1)	1					PLAUR,PTGS2
Alpha catenin	group		1		0.816	0.0143	Alpha catenin	BCL2L1,BGN,COL6A2,KRT6B,LYZ,VIM	6 (1)	1	CDH1				ADAMTS5,NFKBIA,SNAI1
cytochrome-c oxidase	complex		3		-1.134	0.0147	AMPK,COX6A2,COX7A2,cytochrome-c oxidase,p70 S6k	EEF1A1,G6PC,OAT,SCD,THRSP,VIM,YBX1	7 (5)	2		docosahexaenoic acid
NCOR1	transcription regulator		1		0.577	0.0153	NCOR1	G6PC,SERPINF1,THRSP	3 (1)	1	benzyloxycarbonyl-Leu-Leu-Leu aldehyde	genistein		TRH	ADIPOQ,CDKN1A,N-cor,PPARA,PPARα-RXRα,PTGS2,Rar
nicotinic acid	chemical - endogenous mammalian		1		-1.732	0.0153	nicotinic acid	ELOVL5,G6PD,TECR	3 (1)	1				ADIPOQ,CAT,ELOVL5,FABP1,PPARA	FASN,Ldh (complex),MLXIPL
Cdc42	enzyme	1.069	1		1.732	0.0167	Cdc42	CTSA,CTSH,CTSZ	3 (1)	1	AGT,D-glucose,HRAS,Insulin,polyamines,PTGS2,PTK2,putrescine,RAPGEF3,sirolimus,TCR,TP53,TSC2			CTSA,PIK3CB,WAS
CDN1163	chemical reagent		1		1.414	0.0169	CDN1163	G6PC,SCD	2 (1)	1				AMPK	DDIT3,FASN,SREBF1
DL-fructose	chemical - endogenous mammalian		1		-1.414	0.0169	DL-fructose	G6PC,SCD	2 (1)	1				D-glucose,FASN,GCK,glycogen,Insulin,SREBF1
GADD45B	other		1		-1.414	0.0169	GADD45B	BCL2L1,BGN	2 (1)	1	cocaine,epigallocatechin-gallate,NFKBIA,pirinixic acid,TCR	NELFB,oleic acid		CDKN1A
NELFB	other		1		-1.414	0.0169	NELFB	RPLP0,RPS3	2 (1)	1					CDKN1A,GADD45B
(+)-terpinen-4-ol	chemical reagent		1		1	0.017	(+)-terpinen-4-ol	BCL2L1	1 (1)	1
(-)-gossypol-enriched cottonseed oil	chemical reagent		1		1	0.017	(-)-gossypol-enriched cottonseed oil	BCL2L1	1 (1)	1
1-benzyl-2-phenylbenzimidazole	chemical reagent		1		1	0.017	1-benzyl-2-phenylbenzimidazole	BCL2L1	1 (1)	1
2,2-dichloroacetophenone	chemical reagent		1		1	0.017	2,2-dichloroacetophenone	BCL2L1	1 (1)	1
3-aminoisobutanoate	chemical - endogenous mammalian		1		-1	0.017	3-aminoisobutanoate	CPT1A	1 (1)	1
4-(3',5'-dimethoxybenzyloxy)-6-methoxyquinolin-2(1H)-one	chemical reagent		1		1	0.017	4-(3',5'-dimethoxybenzyloxy)-6-methoxyquinolin-2(1H)-one	BCL2L1	1 (1)	1
4-methoxyhonokiol	chemical - endogenous non-mammalian		1		1	0.017	4-methoxyhonokiol	BCL2L1	1 (1)	1					Ikb
6-azidomethyl-1-hydroxy-3,8-dimethoxy-9,10-anthraquinone	chemical reagent		1		1	0.017	6-azidomethyl-1-hydroxy-3,8-dimethoxy-9,10-anthraquinone	BCL2L1	1 (1)	1
7,8-dihydroxy-4-methylcoumarin	chemical reagent		1		1	0.017	7,8-dihydroxy-4-methylcoumarin	BCL2L1	1 (1)	1
8-hydrocalamenene	chemical reagent		1		1	0.017	8-hydrocalamenene	BCL2L1	1 (1)	1
AB1	chemical reagent		1		1	0.017	AB1	BCL2L1	1 (1)	1
ANK2	other		1		1	0.017	ANK2	SPTBN1	1 (1)	1				Focal adhesion kinase
AUH-6-96	chemical reagent		1		1	0.017	AUH-6-96	BCL2L1	1 (1)	1
BAIAP3	other		1		1	0.017	BAIAP3	HRAS	1 (1)	1				HRAS
CENPF	other		1		-1	0.017	CENPF	CENPE	1 (1)	1		PRKAA1,TP53
CLPTM1L	other		1		-1	0.017	CLPTM1L	BCL2L1	1 (1)	1	1,2-dithiol-3-thione,NFE2L2
CPEB4	other		1		-1	0.017	CPEB4	BCL2L1	1 (1)	1
CPS49	chemical reagent		1		1	0.017	CPS49	BCL2L1	1 (1)	1
EAPB0203	chemical reagent		1		1	0.017	EAPB0203	BCL2L1	1 (1)	1
ERMN	other		1		1	0.017	ERMN	CNP	1 (1)	1
GSTA1	enzyme		1		-1	0.017	GSTA1	BCL2L1	1 (1)	1	1,2-dithiol-3-thione,3-methylcholanthrene,CYP1A1,NFE2L2,PRKAA1,troglitazone	butylated hydroxyanisol,GNA12,methotrexate		pregnenolone
GUSB	enzyme	1.761	1		-1	0.017	GUSB	GLA	1 (1)	1	ciprofloxacin,genistein,GNPTAB	HRAS
H9 extract	chemical reagent		1		1	0.017	H9 extract	BCL2L1	1 (1)	1
HO-3867	chemical reagent		1		1	0.017	HO-3867	BCL2L1	1 (1)	1
IBTK	other		1		-1	0.017	IBTK	BCL2L1	1 (1)	1
IGL	other		1		-1	0.017	IGL	BCL2L1	1 (1)	1
Il2 beta gamma receptor	complex		1		-1	0.017	Il2 beta gamma receptor	BCL2L1	1 (1)	1
JOT01006	chemical reagent		1		1	0.017	JOT01006	BCL2L1	1 (1)	1
MAPK substrate-4	chemical reagent		1		1	0.017	MAPK substrate-4	BCL2L1	1 (1)	1
MCM8	enzyme		1		-1	0.017	MCM8	BCL2L1	1 (1)	1
MI-319	chemical reagent		1		1	0.017	MI-319	BCL2L1	1 (1)	1
MPT0B169	chemical reagent		1		1	0.017	MPT0B169	BCL2L1	1 (1)	1
MPT0G009	chemical reagent		1		1	0.017	MPT0G009	BCL2L1	1 (1)	1
Muc4	other		1		-1	0.017	Muc4	BCL2L1	1 (1)	1
N-[3-(trifluoromethyl)phenyl]retinamide	chemical reagent		1		1	0.017	N-[3-(trifluoromethyl)phenyl]retinamide	BCL2L1	1 (1)	1
NEK2	kinase		1		1	0.017	NEK2	BCL2L1	1 (1)	1	ELAVL1,RPS6KA2	TP53
PJA1	enzyme		1		-1	0.017	PJA1	SPTBN1	1 (1)	1	3-deazaneplanocin
PRSS3	peptidase		1		1	0.017	PRSS3	PSAP	1 (1)	1
PTPN13	phosphatase		1		1	0.017	PTPN13	BCL2L1	1 (1)	1
RAB14	enzyme	-1.313	1		1	0.017	RAB14	SLC14A2	1 (1)	1	genistein	mir-144,mir-451
RAMP3	transporter		1		-1	0.017	RAMP3	VIM	1 (1)	1
REG1A	growth factor		1		-1	0.017	REG1A	BCL2L1	1 (1)	1	SCAP,SREBF2
REG4	other		1		-1	0.017	REG4	BCL2L1	1 (1)	1
RNPS1	other		1		1	0.017	RNPS1	BCL2L1	1 (1)	1
Rap	group		1		1	0.017	Rap	MVP	1 (1)	1	DOCK4,RAPGEF3,Trk Receptor,TSC2	RAP1GAP,SYNGAP1		Focal adhesion kinase,PLCE1,PTK2
SPI-112Me	chemical reagent		1		1	0.017	SPI-112Me	BCL2L1	1 (1)	1
TCEAL7	transcription regulator		1		1	0.017	TCEAL7	BCL2L1	1 (1)	1
TL-77	chemical reagent		1		1	0.017	TL-77	BCL2L1	1 (1)	1
TRAPPC9	other		1		-1	0.017	TRAPPC9	BCL2L1	1 (1)	1				NFKBIA
Timp	group		1		-1	0.017	Timp	BCL2L1	1 (1)	1
VTI1B	transporter		1		1	0.017	VTI1B	STX8	1 (1)	1
WJ9708012	chemical reagent		1		1	0.017	WJ9708012	BCL2L1	1 (1)	1
acetylapoaranotin	chemical reagent		1		1	0.017	acetylapoaranotin	BCL2L1	1 (1)	1
acetylaranotin	chemical reagent		1		1	0.017	acetylaranotin	BCL2L1	1 (1)	1
aloin	chemical reagent		1		1	0.017	aloin	BCL2L1	1 (1)	1
alpinetin	chemical reagent		1		1	0.017	alpinetin	BCL2L1	1 (1)	1
atractylenolide I	chemical reagent		1		1	0.017	atractylenolide I	BCL2L1	1 (1)	1
betulin	chemical - endogenous non-mammalian		1		-1	0.017	betulin	BCL2L1	1 (1)	1					SREBF2
bicarbonate	chemical - endogenous mammalian		1		1	0.017	bicarbonate	SLC14A2	1 (1)	1
bisindole-linked pyrrolo[2,1-c][1,4]benzodiazepine 5b	chemical reagent		1		1	0.017	bisindole-linked pyrrolo[2,1-c][1,4]benzodiazepine 5b	BCL2L1	1 (1)	1
bornyl caffeate	chemical reagent		1		1	0.017	bornyl caffeate	BCL2L1	1 (1)	1
cardiotoxin III	chemical reagent		1		1	0.017	cardiotoxin III	BCL2L1	1 (1)	1
danusertib	chemical drug		1		1	0.017	danusertib	BCL2L1	1 (1)	1
deoxyapoaranotin	chemical reagent		1		1	0.017	deoxyapoaranotin	BCL2L1	1 (1)	1
depsipeptide	chemical - other		1		1	0.017	depsipeptide	BCL2L1	1 (1)	1
dianthus chinensis l. ethanol extract	chemical reagent		1		1	0.017	dianthus chinensis l. ethanol extract	BCL2L1	1 (1)	1
farnesiferol C	chemical reagent		1		1	0.017	farnesiferol C	BCL2L1	1 (1)	1
flacourtia indica methanol extract	chemical reagent		1		1	0.017	flacourtia indica methanol extract	BCL2L1	1 (1)	1
fungal taxol	chemical reagent		1		1	0.017	fungal taxol	BCL2L1	1 (1)	1
galiximab	biologic drug		1		1	0.017	galiximab	BCL2L1	1 (1)	1
gelam honey	chemical reagent		1		1	0.017	gelam honey	BCL2L1	1 (1)	1
gypenoside	chemical reagent		1		1	0.017	gypenoside	BCL2L1	1 (1)	1
hederagenin	chemical reagent		1		1	0.017	hederagenin	BCL2L1	1 (1)	1
heteronemin	chemical reagent		1		1	0.017	heteronemin	BCL2L1	1 (1)	1
hydroxyaminoindan	chemical reagent		1		-1	0.017	hydroxyaminoindan	BCL2L1	1 (1)	1
icariin	chemical drug		1		1	0.017	icariin	BCL2L1	1 (1)	1
ingenol mebutate	chemical drug		1		-1	0.017	ingenol mebutate	BCL2L1	1 (1)	1				PRKCH,RAS
korean red ginseng extract	chemical reagent		1		-1	0.017	korean red ginseng extract	BCL2L1	1 (1)	1
let-7c mimic	chemical reagent		1		1	0.017	let-7c mimic	BCL2L1	1 (1)	1
liriope platyphylla root part extract	chemical reagent		1		1	0.017	liriope platyphylla root part extract	BCL2L1	1 (1)	1
luffa echinata roxb fruit extract	chemical reagent		1		1	0.017	luffa echinata roxb fruit extract	BCL2L1	1 (1)	1
mansonone E	chemical reagent		1		1	0.017	mansonone E	BCL2L1	1 (1)	1
melamine	chemical reagent		1		1	0.017	melamine	BCL2L1	1 (1)	1
miR-135a mimic	chemical reagent		1		1	0.017	miR-135a mimic	BCL2L1	1 (1)	1
miR-450a-5p (and other miRNAs w/seed UUUGCGA)	mature microRNA		1		1	0.017	miR-450a-5p (and other miRNAs w/seed UUUGCGA)	HNRNPK	1 (1)	1
miR-4651 (and other miRNAs w/seed GGGGUGG)	mature microRNA		1		1	0.017	miR-4651 (and other miRNAs w/seed GGGGUGG)	BCL2L1	1 (1)	1
mir-216	microRNA		1		1	0.017	mir-216	YBX1	1 (1)	1
mir-491	microRNA		1		1	0.017	mir-491	BCL2L1	1 (1)	1		Insulin
morusin	chemical - endogenous non-mammalian		1		1	0.017	morusin	BCL2L1	1 (1)	1
nitidine	chemical reagent		1		1	0.017	nitidine	BCL2L1	1 (1)	1
norcantharidin	chemical reagent		1		1	0.017	norcantharidin	BCL2L1	1 (1)	1
oxythiamine	chemical reagent		1		1	0.017	oxythiamine	G6PC	1 (1)	1
p-cuminaldehyde	chemical - endogenous non-mammalian		1		1	0.017	p-cuminaldehyde	BCL2L1	1 (1)	1
pepleomycin	chemical drug		1		1	0.017	pepleomycin	BCL2L1	1 (1)	1
persea declinata (bl.) kosterm bark methanolic crude extract	chemical reagent		1		1	0.017	persea declinata (bl.) kosterm bark methanolic crude extract	BCL2L1	1 (1)	1
picolog	chemical reagent		1		1	0.017	picolog	BCL2L1	1 (1)	1
pien tze huang methanol extract	chemical reagent		1		1	0.017	pien tze huang methanol extract	BCL2L1	1 (1)	1
procyanidin B2-3'-O-gallate	chemical reagent		1		1	0.017	procyanidin B2-3'-O-gallate	BCL2L1	1 (1)	1
procyanidin B2-3,3'-di-O-gallate	chemical reagent		1		1	0.017	procyanidin B2-3,3'-di-O-gallate	BCL2L1	1 (1)	1
pseudolaric acid B	chemical reagent		1		1	0.017	pseudolaric acid B	BCL2L1	1 (1)	1
raddeanin A	chemical reagent		1		1	0.017	raddeanin A	BCL2L1	1 (1)	1
rocaglaol	chemical reagent		1		1	0.017	rocaglaol	BCL2L1	1 (1)	1
sargramostim	biologic drug		1		1	0.017	sargramostim	BCL2L1	1 (1)	1				CSF2RB
silmitasertib	chemical drug		1		1	0.017	silmitasertib	BCL2L1	1 (1)	1
solamargine	chemical drug		1		1	0.017	solamargine	BCL2L1	1 (1)	1
subditine	chemical reagent		1		1	0.017	subditine	BCL2L1	1 (1)	1
sun ginseng extract	chemical reagent		1		-1	0.017	sun ginseng extract	BCL2L1	1 (1)	1
tetraacetyl-phytosphingosine	chemical reagent		1		-1	0.017	tetraacetyl-phytosphingosine	BCL2L1	1 (1)	1
tetracaine	chemical drug		1		1	0.017	tetracaine	BCL2L1	1 (1)	1				D-glucose
tinostamustine	chemical drug		1		1	0.017	tinostamustine	BCL2L1	1 (1)	1
uncarinic acid E	chemical reagent		1		1	0.017	uncarinic acid E	BCL2L1	1 (1)	1
yessotoxin	chemical - endogenous non-mammalian		1		-1	0.017	yessotoxin	AKAP1	1 (1)	1
zinc-citrate	chemical reagent		1		1	0.017	zinc-citrate	BCL2L1	1 (1)	1
zuo-jin-wan	chemical drug		1		1	0.017	zuo-jin-wan	BCL2L1	1 (1)	1
docosahexaenoic acid	chemical drug		1		0.378	0.0179	docosahexaenoic acid	ABCD2,ACSS2,ARG1,BCL2L1,CPT1A,FADS2,SCD	7 (1)	1	CFTR,ELOVL5	HINT1,N-cor		ACOX1,ADIPOQ,CDKN1A,NFE2L2,PPARA	cytochrome-c oxidase,DDIT3,ELOVL2,FASN,FOS,Inflammasome (Nalp3, Asc, Casp1),INSIG2,MAPK3,MLXIPL,MYC,PRKACA,PTGS2,SREBF1
PLAUR	transmembrane receptor		1		-0.577	0.0181	PLAUR	BCL2L1,ITGAV,VIM	3 (1)	1	Ctbp,D-glucose,FGFR1,FOS,HRAS,Ngf	8-bromoguanosine 3',5'-cyclic monophosphate,amiloride,mir-194,TFAP2A,TP53		CCND1,PTK2,SNAI1	AMPK
xanthohumol	chemical - endogenous non-mammalian		1		1.732	0.0181	xanthohumol	BCL2L1,CKMT2,SCD	3 (1)	1				NQO1	CCND1,CYP,FASN,FOS,MYC,NFKBIA,SREBF1,Srebp
ALOX5AP	other		2		-1.633	0.0186	ALOX5,ALOX5AP,AMPK	G6PC,ITGAV,OAT,THRSP,VIM,YBX1	6 (3)	2				ALOX5	AMPK
methylphenazonium methosulfate	chemical toxicant		2	Inhibited	-2.449	0.0192	AMPK,methylphenazonium methosulfate,MMP2	BCL2L1,G6PC,OAT,THRSP,VIM,YBX1	6 (3)	2					AMPK
ADAMTS5	peptidase		2		-0.577	0.0196	ADAMTS5,COL2A1,TIMP3	BGN,Ighg2b,VIM	3 (3)	3	L-triiodothyronine,NFKBIA	AGT,Alpha catenin,epigallocatechin-gallate
JAK	group		1		-0.577	0.0196	JAK	BCL2L1,ISG15,VIM	3 (1)	1	GP130-LIFR,IL21R
CSF2RB	transmembrane receptor		1		0	0.0198	CSF2RB	BCL2L1,SNAP23	2 (1)	1	ciprofloxacin,MST1R,sargramostim			FOS,IRS2,MAPK3,MYC,PTPN2
Srebp	group		1		-1.414	0.0198	Srebp	ACSS2,G6PD	2 (1)	1		N-nitro-L-arginine methyl ester,xanthohumol		ACLY,CDKN1A,D-glucose,FASN,FOS
clofibric acid	chemical drug		1		-1.414	0.0198	clofibric acid	FABP2,SCD	2 (1)	1				8-oxo-7-hydrodeoxyguanosine,ACOX1,CAT,PPARA,TP53
tetrandrine	chemical drug		1		1.414	0.0198	tetrandrine	BCL2L1,YBX1	2 (1)	1				CDKN1A,TP53	cyclooxygenase
guanidine	chemical drug		2		1.633	0.0199	AMPK,guanidine,SERPINE1	G6PC,ITGAV,OAT,THRSP,VIM,YBX1	6 (3)	2				AMPK
6-aminocaproic acid	chemical drug		2	Activated	2.236	0.0202	6-aminocaproic acid,PLAT,PLG	ARG1,CYP2S1,MVP,RAB5A,RALA	5 (3)	2
3-deazaneplanocin	chemical drug		1		0	0.021	3-deazaneplanocin	BCL2L1,KRT17,MVP,SLC7A2	4 (1)	1				CDKN1A,PJA1	MYC
pranlukast	chemical drug		2		1.633	0.0214	AMPK,CASP3,pranlukast	BCL2L1,G6PC,OAT,THRSP,VIM,YBX1	6 (3)	2				AMPK
RYBP	transcription regulator		2		-1.414	0.0228	ENO1,GABP,RYBP	BCL2L1,SKP2	2 (3)	2		CD 437,ST1926
acadesine	chemical drug		1		1.414	0.0228	acadesine	OAT,THRSP	2 (1)	1				AMPK,CDKN1A,oleic acid,PRKAA1,PTGS2,TP53	FASN,glycogen,GPAM,SREBF1
ibrutinib	chemical drug		1		0	0.0228	ibrutinib	BCL2L1,RPS6	2 (1)	1
4-coumaric acid	chemical - endogenous mammalian		2	Activated	2.449	0.0236	4-coumaric acid,ACACA,AMPK	G6PC,OAT,SCD,THRSP,VIM,YBX1	6 (3)	2				AMPK	PTGS2
dioleoylphosphatidic acid	chemical - endogenous mammalian		2	Inhibited	-2	0.0245	dioleoylphosphatidic acid,p70 S6k,RPS6KB1	BCL2L1,EEF1A1,ISG15,SCD	4 (3)	2
INSIG2	other		1		1.414	0.026	INSIG2	G6PD,SCD	2 (1)	1	Insulin,PPARA	arachidonic acid,docosahexaenoic acid,ELOVL5			ACLY,FASN,GPAM,SREBF1,SREBF2,sterol
MAP2K6	kinase		1		-1.732	0.0264	MAP2K6	BGN,ISG15,PRDX1	3 (1)	1	GCG,MAP3K5	cocaine,HSPA1A/HSPA1B		MAPK11,MAPK12,NFAT5	NFE2L2
roscovitine	chemical drug		1		0.577	0.0264	roscovitine	PCYT1A,RALA,SKP2	3 (1)	1				TP53	BLM,CCND1,CDK5,CDKN1A,MYC,OPRD1,PPP1R1B
CEBPE	transcription regulator		1		0.577	0.0282	CEBPE	BCL2L1,LYZ,PRG2	3 (1)	1	imatinib,lestaurtinib,PML			SERPINB2
DIDO1	other		2		0.577	0.0282	CASP3,CASP6,DIDO1	ARG1,BCL2L1,ITGAV	3 (3)	3		ING1
DNAJB6	transcription regulator		1		0	0.0294	DNAJB6	KRT18,VIM	2 (1)	1	PML				SPP1
MST1R	kinase		1		-1.414	0.0294	MST1R	ARG1,VIM	2 (1)	1	benzyloxycarbonyl-Leu-Leu-Leu aldehyde,SEMA4D,SRSF2	genistein,NFE2L2		CCND1,CSF2RB,FOS,MAPK3,MYC,RPS6KA2	CDH1
QKI	other		1		0	0.0294	QKI	HNRNPF,VIM	2 (1)	1	CCND1,CYP1A1,troglitazone
FASN	enzyme	1.031	1		0.577	0.0321	FASN	SCD,SKP2,VIM	3 (1)	1	AGT,carbohydrate,D-glucose,DL-fructose,FOS,GCK,HRAS,HSPA5,IGF1R,Ins1,Insulin,IRS2,isoquercitrin,KDM1A,L-triiodothyronine,leucine,methotrexate,MLXIPL,MYC,NRIP1,oleic acid,palmitic acid,PCGEM1,pirinixic acid,PPARA,SCAP,SREBF1,SREBF2,Srebp,sterol,TO-901317,troglitazone,USF2,XBP1	acadesine,alvespimycin,AMPK,arachidonic acid,carnosine,CDN1163,docosahexaenoic acid,EHHADH,ELOVL2,ELOVL5,FGF19,fibric acid derivative,GCG,HSD17B4,INSIG2,iodoacetamide,linolenic acid,Mup1 (includes others),N-cor,nicotinic acid,OBP2B,PML,PRKAA,SIK1/SIK1B,sirolimus,SNAI1,sphingomyelin,tanespimycin,TP53,TRIB1,TXNIP,xanthohumol		CDH1,GPAM	DDIT3,PTGS2
CSNK2A1	kinase		1		-1.414	0.033	CSNK2A1	BCL2L1,VIM	2 (1)	1	trichloroethylene	sirolimus		CCND1,EIF4B,LARP1,N-cor,NFKBIA,PML,SNAI1,SRSF2,THOC5	Creb,GPI,SSRP1
GAB1	kinase		1		0	0.033	GAB1	ARG1,HRAS	2 (1)	1	D-glucose,EPO,GIP,GNA12,GP130-LIFR,Ins1,Insulin,PIK3CB,SEMA4D,TCR	genistein,imatinib		HRAS,MAPK3,NFKBIA	IRS2
GPI	enzyme	-1.136	1		0	0.033	GPI	SKP2,VIM	2 (1)	1	D-glucose,IL15,MYC,PCGEM1,TP53	CSNK2A1		CCND1,RAC1,SNAI1	CDH1
PPP1R1B	phosphatase		1		-1.414	0.033	PPP1R1B	BCL2L1,SRSF3	2 (1)	1	8-bromoguanosine 3',5'-cyclic monophosphate,cAMP-dependent protein kinase,CDK5,cocaine,raclopride	roscovitine		CCND1,Creb,FOS,MAPK3,MYC
dactolisib	chemical drug		1		0	0.033	dactolisib	RPS6,SKP2	2 (1)	1				CDH1,RICTOR	CDKN1A,PIK3CB,SNAI1
tapentadol	chemical drug		2		-1.414	0.033	OPRM1,SLC6A2,tapentadol	PSAP,VIM	2 (3)	2
3-(methylthio)propionic acid	chemical - endogenous mammalian		1		1	0.0336	3-(methylthio)propionic acid	G6PC	1 (1)	1					D-glucose
3830403N18Rik/Xlr	other		1		-1	0.0336	3830403N18Rik/Xlr	BCL2L1	1 (1)	1
7alpha-hydroxycholesterol	chemical - endogenous mammalian		1		1	0.0336	7alpha-hydroxycholesterol	G6PC	1 (1)	1					D-glucose
ADAMTS5	peptidase		1		1	0.0336	ADAMTS5	BGN	1 (1)	1	L-triiodothyronine,NFKBIA	AGT,Alpha catenin,epigallocatechin-gallate
C1QL3	other		1		1	0.0336	C1QL3	G6PC	1 (1)	1				PRKAA	D-glucose
CARHSP1	transcription regulator		1		1	0.0336	CARHSP1	G6PC	1 (1)	1		sirolimus			PPARA
CNBP	transcription regulator		1		-1	0.0336	CNBP	RPS6	1 (1)	1				MYC
CTSA	peptidase	1.74	1		1	0.0336	CTSA	GLB1	1 (1)	1	Cdc42,ciprofloxacin,genistein,PRL,TFEB
EIF4B	translation regulator		1		-1	0.0336	EIF4B	ISG15	1 (1)	1	CSNK2A1,GCG,Insulin,RPS6KB2	CD 437,imatinib,sirolimus,ST1926
Gm4836 (includes others)	other		1		-1	0.0336	Gm4836 (includes others)	BCL2L1	1 (1)	1
ITPR3	ion channel		1		-1	0.0336	ITPR3	G6PC	1 (1)	1	benzyloxycarbonyl-Leu-Leu-Leu aldehyde,BOK,cAMP-dependent protein kinase			PRKAA
KU-60019	chemical - kinase inhibitor		1		-1	0.0336	KU-60019	GLB1	1 (1)	1
NAGLU	enzyme		1		-1	0.0336	NAGLU	LYZ	1 (1)	1	genistein,NFKBIA,TFEB				PRKAA1
NEU2	enzyme		1		1	0.0336	NEU2	BCL2L1	1 (1)	1
PIN4	enzyme		1		1	0.0336	PIN4	G6PC	1 (1)	1
POLDIP3	other		1		-1	0.0336	POLDIP3	ISG15	1 (1)	1	Insulin,MYC	sirolimus		CDKN1A
PYY	other		1		-1	0.0336	PYY	FABP2	1 (1)	1					D-glucose
SELENOH	other		1		-1	0.0336	SELENOH	GLB1	1 (1)	1
SLC4A5	transporter		1		-1	0.0336	SLC4A5	SPTBN1	1 (1)	1
SYCP3	other		1		-1	0.0336	SYCP3	BCL2L1	1 (1)	1		RNF2
UFL1	enzyme	-1.476	1		-1	0.0336	UFL1	CDK5RAP3	1 (1)	1
Zingiber officiale ginger extract	chemical drug		1		1	0.0336	Zingiber officiale ginger extract	BCL2L1	1 (1)	1				arachidonic acid
cerebroside 3-sulfate	chemical - endogenous mammalian		1		1	0.0336	cerebroside 3-sulfate	ITGAV	1 (1)	1		HINT1
hexanoic acid	chemical - endogenous mammalian		1		-1	0.0336	hexanoic acid	G6PC	1 (1)	1	sirolimus
miR-489-3p (miRNAs w/seed UGACAUC)	mature microRNA		1		1	0.0336	miR-489-3p (miRNAs w/seed UGACAUC)	PEX7	1 (1)	1
sulprostone	chemical drug		1		1	0.0336	sulprostone	THRSP	1 (1)	1				PTGS2
AKT3	kinase		1		0	0.0367	AKT3	RPS6,TOMM70	2 (1)	1	Insulin	GSK690693,PHLPP2,tanespimycin,TP53,triciribine phosphate		RAC1
BLM	enzyme		2		1.414	0.0406	BLM,PARP,TOP1	GLB1,VIM	2 (3)	2	EPO,TTK	roscovitine,TP53		CDKN1A	WRN
Ikb	group		1		0	0.0406	Ikb	BCL2L1,KRT6B	2 (1)	1	Chuk-Ikbkb-Ikbkg,fibric acid derivative,PLCE1,PPARA	4-methoxyhonokiol,ADIPOQ,benzyloxycarbonyl-Leu-Leu-Leu aldehyde,Insulin,NFE2L2,palmitic acid		CCND1
RACK1	enzyme	-1.736	1		1.414	0.0406	RACK1	BCL2L1,ISG15	2 (1)	1	1,2-dithiol-3-thione,NFE2L2	sirolimus		FOS,MYC,PTK2,RAC1	WRN
Rar	group		1		1.414	0.0406	Rar	ARG1,SERPINF1	2 (1)	1	palmitic acid,PML	N-cor,NCOR1,NRIP1			FOS
MUC1	other		1		-0.577	0.0407	MUC1	ARG1,BCL2L1,VIM	3 (1)	1	LGALS3	15-deoxy-delta-12,14 -PGJ 2,troglitazone		CAT,CCND1,MAPK3,MYC,NFKBIA	CDH1,Focal adhesion kinase
Aldose Reductase	group		1		0	0.0487	Aldose Reductase	BCL2L1,G6PD	2 (1)	1	D-glucose	NFE2L2,NQO1		CCND1,MYC
4-aminophenol	chemical - endogenous mammalian		1		-1	0.05	4-aminophenol	VIM	1 (1)	1				SPP1
ADI PEG20	biologic drug		1		-1	0.05	ADI PEG20	ASS1	1 (1)	1				KRAS,MYC
DIDO1	other		1		1	0.05	DIDO1	ITGAV	1 (1)	1		ING1
Diap	group		1		1	0.05	Diap	SKP2	1 (1)	1
ELOVL2	enzyme	-1.232	1		1	0.05	ELOVL2	SCD	1 (1)	1		arachidonic acid,docosahexaenoic acid,ELOVL5,PRKAA1			FASN,SREBF1
FTMT	enzyme		1		-1	0.05	FTMT	FTL	1 (1)	1
KDM4B	enzyme		1		-1	0.05	KDM4B	VIM	1 (1)	1
PFKFB1	kinase		1		-1	0.05	PFKFB1	G6PC	1 (1)	1	ADIPOQ,Ins1,MYC,PRKACA	TP53		fructose-1,6-diphosphate,GCK	glycogen
PTPN23	phosphatase		1		1	0.05	PTPN23	VIM	1 (1)	1	PTK2				SNAI1
ZHX2	transcription regulator		1		-1	0.05	ZHX2	Mup1 (includes others)	1 (1)	1		AMPK		Mup1 (includes others)
stavudine	chemical drug		1		-1	0.05	stavudine	CPT1A	1 (1)	1	creatine kinase			8-oxo-7-hydrodeoxyguanosine	PPARA
Inflammasome (Nalp3, Asc, Casp1)	complex		1		-1	0.0662	Inflammasome (Nalp3, Asc, Casp1)	SCD	1 (1)	1	PML,TXNIP	15-deoxy-delta-12,14 -PGJ 2,docosahexaenoic acid,PTGS2		SREBF1,SREBF2
RBM14	transcription regulator		1		-1	0.0662	RBM14	SKP2	1 (1)	1					CCND1,MYC
bardoxolone methyl	chemical drug		1		1.414	0.0714	bardoxolone methyl	BCL2L1,THRSP	2 (1)	1				AMPK,NFE2L2	CCND1,MYC,NFKBIA,PTGS2
MEFV	other		1		1	0.082	MEFV	LYZ	1 (1)	1

## Sheet: Diseases and Bio Functions
Categories	Functions	Diseases or Functions Annotation	p-Value	Predicted Activation State	Activation z-score	Molecules	# Molecules
RNA Damage and Repair	decay	Decay of mRNA	7.55e-75			RPL7A,RPL13A,RPS24,RPL37A,RPL23,RPS5,RPL26,RPS19,RPS13,RPL8,RPL14,RPL27A,RPL30,RPS6,RPS18,RPL11,RPLP2,RPL35,RPL22,RPS7,RPS12,RPS16,RPL7,RPLP0,RPS9,NCL,RPL27,ETF1,RPS15,RPS10,RPS26,RPL35A,RPS20,RPL6,RPL12,RPL5,RPL9,RPL28,RPL38,RPS15A,RPL3,RPS4Y1,RPL31,RPS8,RPL4,RPL18A,RPS25,RPL17,RPL21,RPL13,RPS2,RPS3,RPSA,RPL24,RPS17,RPS23,RPS28,RPL10,RPL10A	59
RNA Damage and Repair	nonsense-mediated mRNA decay	Nonsense-mediated mRNA decay	3.33e-74			RPL7A,RPL13A,RPS24,RPL37A,RPL23,RPS5,RPL26,RPS19,RPS13,RPL8,RPL14,RPL27A,RPL30,RPS6,RPS18,RPL11,RPLP2,RPL35,RPL22,RPS7,RPS12,RPS16,RPL7,RPLP0,RPS9,RPL27,ETF1,RPS15,RPS10,RPS26,RPL35A,RPS20,RPL6,RPL12,RPL5,RPL9,RPL28,RPL38,RPS15A,RPL3,RPS4Y1,RPL31,RPS8,RPL4,RPL18A,RPS25,RPL17,RPL21,RPL13,RPS2,RPS3,RPSA,RPL24,RPS17,RPS23,RPS28,RPL10,RPL10A	58
Protein Synthesis	translation	Initiation of translation of protein	1.37e-68			RPL7A,RPL13A,RPS24,RPL37A,RPL23,RPS5,RPL26,RPS13,RPS19,RPL8,RPL14,RPL27A,RPL30,RPS6,RPS18,RPL11,EIF3A,RPLP2,RPL35,RPL22,RPS7,RPS12,EIF5,RPS16,RPL7,RPLP0,RPS9,RPL27,RPS15,RPS10,RPS26,RPL35A,RPL6,RPS20,RPL12,RPL5,RPL9,RPL28,RPL38,RPS15A,RPL3,RPS4Y1,RPS8,RPL31,RPL4,RPL18A,RPS25,RPL17,RPL21,RPL13,RPS2,RPS3,RPSA,RPL24,RPS17,RPS23,RPS28,EIF4E,RPL10,RPL10A	60
Protein Synthesis	translation	Translation	3.88e-51	Decreased	-2.014	RPL7A,RPL13A,RPS24,RPL37A,RPL23,RPS5,Rplp1 (includes others),RPL26,RPS13,RPS19,RPL8,RPL14,RPL27A,RPL30,EEF1A1,RPS6,RPS18,EIF3A,HNRNPK,RPL11,RPLP2,RPL35,RPS7,RPL22,DDX25,EIF5,RPS12,RPS16,RPLP0,RPL7,RPS9,NCL,RPL27,ETF1,RPS15,SRSF3,RPS10,RPS26,RPL35A,RPL6,RPS20,RPL12,RPL5,RPL9,RPL28,RPL38,RPS15A,RPL3,RPS4Y1,YBX1,RPL31,RPS8,RPL4,RPL18A,RPS25,RPL17,RACK1,RPL21,RPL13,RPS2,RPSA,RPS3,RPL24,RPS17,RPS23,RP…	70
Protein Synthesis	translation	Translation of protein	4.83e-51		-1.374	RPL7A,RPL13A,RPS24,RPL37A,RPL23,RPS5,Rplp1 (includes others),RPL26,RPS13,RPS19,RPL8,RPL14,RPL27A,RPL30,EEF1A1,RPS6,RPS18,EIF3A,HNRNPK,RPL11,RPLP2,RPL35,RPS7,RPL22,DDX25,EIF5,RPS12,RPS16,RPLP0,RPL7,RPS9,NCL,RPL27,ETF1,RPS15,SRSF3,RPS10,RPS26,RPL35A,RPL6,RPS20,RPL12,RPL5,RPL9,RPL28,RPL38,RPS15A,RPL3,RPS4Y1,YBX1,RPL31,RPS8,RPL4,RPL18A,RPS25,RPL17,RACK1,RPL21,RPL13,RPS2,RPSA,RPS3,RPL24,RPS17,RPS23,RP…	69
Protein Synthesis	synthesis	Synthesis of protein	2.42e-38	Decreased	-2.959	RPL7A,RPL13A,RPS24,RPL37A,RPL23,RPS5,Rplp1 (includes others),RPL26,RPS13,RPS19,RPL8,RPL14,RPL27A,RPL30,EEF1A1,RPS6,EIF3A,RPS18,HNRNPK,RPL11,RPLP2,RPL35,RPS7,RPL22,DDX25,EIF5,RPS12,RPS16,RPL7,RPLP0,RPS9,NCL,RPL27,ETF1,RPS15,KRT17,SRSF3,RPS10,RPS26,RPL35A,RPS20,RPL6,RPL12,VIM,RPL5,RPL9,RPL28,RPL38,RPS15A,Rps3a1,RPL3,RPS4Y1,YBX1,RPL31,RPS8,RPL4,RPL18A,RPS25,RPL17,RACK1,RPL21,RPL13,RPS2,RPSA,RPS3,RPL…	73
Cancer, Cell Death and Survival, Organismal Injury and Abnormalities, Tumor Morphology	cell death	Cell death of osteosarcoma cells	2.56e-36	Increased	5.84	RPL7A,RPL13A,RPS24,SNRPD1,RPL37A,RPL35A,RPS5,RPL6,RPS13,RPS19,RPL5,RPL9,RPL38,RPS15A,Rps3a1,RPL3,RPS4Y1,RPL31,RPL27A,CELA1,EEF1A1,RPS18,RPL11,COPB2,RPL35,RPS7,RPL13,Rpl23a,RPS12,RPS3,RPS16,RPL7,RPLP0,RPS17,COPA,RPS28,RPL27,RPL10	38
Protein Synthesis	metabolism	Metabolism of protein	5.81e-29	Decreased	-3.249	RPS24,MIA3,ANPEP,RPS5,RPL26,RPS13,RPS19,RPL8,RPL14,RPL30,UBE2L3,EEF1A1,RPS18,RPLP2,DDX25,RPS12,LYZ,DPP7,PEX6,RPS9,CTSC,BCL2L1,CTSZ,KRT17,SRSF3,RPS20,RPL6,VIM,RPL5,RPL38,Rps3a1,RPS4Y1,YBX1,RPL4,RPS25,RACK1,VPS35,RPS2,CTSH,OS9,RPL24,RPS17,RPS28,EIF4E,NLN,HRAS,RPL10,RPL10A,RPL7A,RPL13A,RPL37A,MANBA,RPL23,Rplp1 (includes others),SKP2,CPQ,RPL27A,SLC14A2,Ighg2a,RPS6,RPL11,EIF3A,HNRNPK,RPL35,RPS7,RPL22,…	97
Cancer, Cell Death and Survival, Organismal Injury and Abnormalities, Tumor Morphology	cell death	Cell death of cancer cells	1.53e-17	Increased	5.457	RPL7A,FHIT,RPL13A,ITGAV,RPS24,SNRPD1,RPL37A,ANPEP,RPL35A,RPS5,RPL6,RPS13,RPS19,RPL5,RPL9,RPL38,RPS15A,Rps3a1,RPL3,RPS4Y1,RPL31,RPL27A,CELA1,EEF1A1,COPB2,RPS18,RPL11,RPL35,RPS7,RPL13,Rpl23a,RPS12,RPS3,RPS16,RPL7,RPLP0,RPS17,COPA,RPS28,BCL2L1,RPL27,RPL10	42
Cellular Compromise, Inflammatory Response	degranulation	Degranulation of neutrophils	2.22e-17			FTL,ITGAV,GALNS,RNASET2,GM2A,ANPEP,MANBA,GLB1,GLA,RAB9B,SNAP23,GUSB,ARG1,PSAP,GGH,CTSA,ARSB,ARSA,PRG2,CREG1,EEF1A1,KRT1,NEU1,ENPP4,GAA,VNN1,LYZ,DPP7,CTSH,CTSC,COPB1,FUCA1,PSMD13,SNAP29,NHLRC3,PDXK,ARL8A,MVP,PRCP,SPTAN1,CTSZ	41
Cancer, Cell Death and Survival, Organismal Injury and Abnormalities, Tumor Morphology	cell death	Cell death of tumor cells	5.05e-16	Increased	5.55	RPL7A,FHIT,RPL13A,ITGAV,RPS24,SNRPD1,RPL37A,ANPEP,RPL35A,RPS5,RPL6,RPS13,RPS19,RPL5,RPL9,RPL38,RPS15A,Rps3a1,RPL3,RPS4Y1,RPL31,RPL27A,CELA1,EEF1A1,RACK1,COPB2,RPS18,RPL11,RPL35,RPS7,RPL13,Rpl23a,RPS12,RPS3,RPS16,RPL7,RPLP0,RPS17,COPA,RPS28,BCL2L1,HRAS,RPL27,RPL10	44
Cancer, Cardiovascular Disease, Developmental Disorder, Hematological Disease, Hereditary Disorder, Organismal Injury and Abnormalities	Diamond-Blackfan anemia	Diamond-Blackfan anemia	8.29e-15			RPS19,RPL5,RPS10,RPS26,RPL11,RPS17,RPS24,RPS7,RPS28,RPL35A,RPL27,RPL26	12
Protein Trafficking	targeting	Targeting of protein	5.05e-13			PAOX,DDO,PEX7,RPL11,PEX19,AP3B1,TOMM70,AGXT,PEX26,DHRS4,OS9,PEX1,IDE,PEX6,TIMM8B,PEX2,HAO2,PEX12,PECR,SEC63,ACOT2,NUTF2,ACOT4,ARL1	24
Developmental Disorder, Hereditary Disorder, Metabolic Disease, Organismal Injury and Abnormalities	lysosomal storage disease	Lysosomal storage disease	1.54e-12	Decreased	-2.554	NEU1,GALNS,PPT1,GM2A,MANBA,GLB1,GLA,NAGA,GUSB,MIGA2,FUCA1,PSAP,CTSA,SNAP29,ARSB,PPT2,ARSA	17
RNA Post-Transcriptional Modification	processing	Processing of rRNA	2.11e-12			RPS6,RPL11,RPS24,RPS7,RPL35A,RPS2,RPL26,RPS19,RPS16,RPL5,RPL7,RPS9,RPS17,RPS28,RPL14,RPL27,RPS15	17
Cardiovascular Disease, Developmental Disorder, Hematological Disease, Organismal Injury and Abnormalities	congenital anemia	Congenital anemia	1.05e-11			G6PD,RPS10,RPS26,RPL11,CPOX,RPS24,TXNRD1,RPS7,RPL35A,RPL26,RPS19,RPL5,RPS17,RPS28,RPL27	15
Gene Expression, Protein Synthesis	translation	Translation of RNA	1.46e-11		1.951	RPL13A,RACK1,RPS24,RPL23,RPS5,Rplp1 (includes others),DDX25,EIF5,RPS3,RPS9,RPL38,RPL24,RPS17,RPS23,RPS4Y1,RPS28,EIF4E,RPL27A,RPL10,ETF1,RPL30,RPL10A	22
Cellular Compromise, Inflammatory Response	degranulation	Degranulation of cells	2.14e-11		-1	FTL,GALNS,ITGAV,PLSCR1,GM2A,RNASET2,ANPEP,MANBA,GLB1,GLA,RAB9B,SNAP23,GUSB,ARG1,PSAP,GGH,CTSA,ARSB,ARSA,PRG2,CREG1,EEF1A1,KRT1,NEU1,ENPP4,GAA,VNN1,LYZ,DPP7,CTSH,RALA,CTSC,COPB1,FUCA1,PSMD13,SNAP29,ARL8A,NHLRC3,PDXK,MVP,SPTAN1,PRCP,CTSZ	43
Cardiovascular Disease, Developmental Disorder, Hematological Disease, Organismal Injury and Abnormalities	congenital aplastic anemia	Congenital aplastic anemia	2.75e-11			RPS26,RPS10,RPL11,RPS24,RPS7,TXNRD1,RPL35A,RPL26,RPS19,RPL5,RPS17,RPS28,RPL27	13
Developmental Disorder, Hereditary Disorder, Metabolic Disease, Organismal Injury and Abnormalities	peroxisome biogenesis disorder	Peroxisome biogenesis disorder	5.9e-11			PEX7,PEX1,PEX6,PEX19,PEX2,PEX12,ABCD2,PEX26	8
Gene Expression, Protein Synthesis	translation	Translation of mRNA	7.26e-11		1.951	RPL13A,RACK1,RPS24,RPL23,RPS5,Rplp1 (includes others),DDX25,EIF5,RPS3,RPS9,RPL38,RPL24,RPS17,RPS23,RPS4Y1,RPS28,EIF4E,RPL27A,RPL10,RPL30,RPL10A	21
Cancer, Hematological Disease, Hereditary Disorder, Organismal Injury and Abnormalities	constitutional bone marrow failure syndrome	Constitutional bone marrow failure syndrome	9.28e-11			RPS10,RPS26,RPL11,RPS24,RPS7,TXNRD1,RPL35A,RPL26,RPS19,RPL5,RPS17,RPS28,RPL27	13
Developmental Disorder, Hereditary Disorder, Metabolic Disease, Organismal Injury and Abnormalities	peroxisomal disorder	Peroxisomal disorder	1.35e-10			PEX7,PEX1,PEX6,PEX19,PEX2,AGXT,PEX12,ABCD2,PEX26	9
Cancer, Hematological Disease, Immunological Disease, Organismal Injury and Abnormalities	acute myeloid leukemia	Chemoresistant acute myeloid leukemia	3.32e-10			LYZ,EEF1A1,RPL11,RPS24,RPL3,RPS12,RPL6,RPS25	8
Developmental Disorder, Hereditary Disorder, Metabolic Disease, Organismal Injury and Abnormalities	Zellweger syndrome	Zellweger syndrome	1.82e-09			PEX1,PEX6,PEX19,PEX2,PEX12,ABCD2,PEX26	7
Carbohydrate Metabolism	catabolism	Catabolism of carbohydrate	1.83e-09			NEU1,GALNS,GM2A,AP3B1,PITPNA,G6PC,MANBA,GAA,GLB1,NAGA,AMY2A,GUSB,MAN2B2,CTBS,PRELP,CHIA	16
Developmental Disorder, Hereditary Disorder, Metabolic Disease, Organismal Injury and Abnormalities	infantile refsum disease	Infantile refsum disease	7.09e-09			PEX1,PEX6,PEX2,PEX12,PEX26	5
Developmental Disorder, Hereditary Disorder, Metabolic Disease, Organismal Injury and Abnormalities	Zellweger peroxisome biogenesis disorder 1A	Zellweger peroxisome biogenesis disorder 1A	1.66e-08			PEX1,PEX6,PEX19,PEX2,PEX12,PEX26	6
Carbohydrate Metabolism	metabolism	Metabolism of carbohydrate	2.82e-08		-0.067	ACP6,GALNS,ITGAV,PLSCR1,AGPAT3,AP3B1,GM2A,CPT1A,PITPNA,G6PC,MANBA,Mup1 (includes others),GLB1,GYS2,GLA,TKT,GUSB,PCYT1A,SCD,SYNJ2,SIAE,CTBS,PRELP,CHIA,G6PD,EEF1A1,RAB4A,NEU1,RAB5A,STARD10,GAA,NAGA,ETNPPL,AMY2A,PGGHG,MAN2B2,RALA,FUCA1,TALDO1,PLA2G15,HRAS,BGN	42
Cellular Assembly and Organization, Cellular Function and Maintenance	organization	Organization of peroxisomes	3.02e-08			PEX7,PEX11A,PEX1,PEX6,PEX19,PEX2,PEX12	7
Cell Death and Survival	necrosis	Necrosis	7.64e-08	Increased	3.972	KRT8,PPT1,RPS24,ANPEP,RPS5,CNP,RPS13,RPS19,TMEM214,TPT1,PDK2,AKAP1,CELA1,KCNMA1,UBE2L3,EEF1A1,RPS18,RPS12,LYZ,Igkv1-117,BCLAF1,BCL2L1,CENPE,PPT2,CTSZ,SEC61G,PITPNA,TMEM109,RPL6,SPTBN1,VIM,DNASE2,RPL5,RPL38,ISG15,Rps3a1,SLC26A11,RPS4Y1,YBX1,SRSF1,RACK1,TXNRD1,SET,MAVS,SND1,CTNNA2,RPS17,MCU,RPS28,EIF4E,HRAS,RPL10,MVP,FDXR,RPL7A,RPL13A,ITGAV,SERPINF1,ASS1,G6PC,SNRPD1,RPL37A,PRDX1,SKP2,TXN2,ARG1,RPL2…	110
Lipid Metabolism, Small Molecule Biochemistry	metabolism	Metabolism of membrane lipid derivative	9.35e-08		1.474	FDXR,PEX7,ACP6,PPT1,PLSCR1,AGPAT3,AP3B1,GM2A,GLB1,GLA,GPX4,PCYT1A,SCD,PEX2,SYNJ2,PSAP,CTSA,ARSA,G6PD,EEF1A1,RAB4A,ORMDL2,NEU1,SGPL1,RAB5A,STARD10,ETNPPL,AGMO,RALA,BCL2L1,PLA2G15	31
Developmental Disorder, Hereditary Disorder, Metabolic Disease, Organismal Injury and Abnormalities	inborn error of carbohydrate metabolism	Inborn error of carbohydrate metabolism	1.05e-07			G6PD,NEU1,GALNS,NUS1,AGXT,G6PC,GAA,GLB1,GYS2,GUSB,FUCA1,MOGS,CTSA,ARSB	14
Lipid Metabolism, Small Molecule Biochemistry	catabolism	Catabolism of sphingolipid	1.18e-07	Increased	2.193	PPT1,SGPL1,GM2A,PSAP,GLB1,GLA,ARSA	7
Infectious Diseases	infection	Viral Infection	1.85e-07	Decreased	-2.708	KRT8,FTL,RPL13A,ITGAV,TECR,MANBA,ANPEP,RPS5,CNP,PRDX1,RPS13,TPT1,SYNJ2,PSMA1,SRSF6,DDO,IGKC,RPS6,UBE2L3,EEF1A1,EIF3A,HNRNPK,RPL35,RPS16,NCL,COPB1,ABCD2,BCLAF1,TALDO1,BCL2L1,MGLL,ETF1,SPTAN1,CTSZ,RPS10,HNRNPF,GM2A,SEC61G,RPS20,RPL12,SPTBN1,TKT,SPCS1,RPL5,RPL38,ISG15,RPL3,RPS4Y1,YBX1,RTN3,CXADR,SRSF1,TANK,COPB2,SGPL1,RACK1,TOMM70,DDB1,RAB5A,GAA,RPSA,KRT18,MAVS,AMY2A,COPA,PLIN3,RPS23,HRAS,PDXK,RPL10…	72
Developmental Disorder, Hereditary Disorder, Metabolic Disease, Organismal Injury and Abnormalities	mucopolysaccharidoses	Mucopolysaccharidoses	2.07e-07			GUSB,GALNS,NEU1,CTSA,GLB1,ARSB	6
RNA Post-Transcriptional Modification	processing	Processing of RNA	2.29e-07		-1.372	SRSF3,HNRNPF,NUFIP1,RPS24,SNRPD1,RPL35A,RPL26,RPS19,RPL5,FARS2,YBX1,RPL14,SRSF6,SRSF1,RPS6,HNRNPK,RPL11,RPS7,RPS2,RPS16,RPL7,CWC22,RPS9,RPS17,RPS28,RPL27,RPS15	27
Cellular Assembly and Organization, Cellular Function and Maintenance	formation	Formation of peroxisomes	2.82e-07			PEX1,PEX11A,PEX6,PEX19,PEX26	5
Developmental Disorder, Hereditary Disorder, Metabolic Disease, Organismal Injury and Abnormalities	inborn error of lipid metabolism	Inborn error of lipid metabolism	4.5e-07			PEX1,PEX6,PEX2,GM2A,CPT1A,PEX12,PSAP,PEX26	8
Cancer, Organismal Injury and Abnormalities, Respiratory Disease	non-small cell lung carcinoma	Stage I metastatic non-small cell lung carcinoma	7.48e-07			EEF1A1,RPS6,RPL7,FTL,TPT1,SEC61G,RPL27	7
Digestive System Development and Function, Gastrointestinal Disease, Hepatic System Development and Function, Hepatic System Disease, Organ Morphology, Organismal Development, Organismal Injury and Abnormalities	abnormal morphology	Abnormal morphology of liver	8.37e-07			KRT8,PEX11A,PPT1,PITPNA,G6PC,MANBA,BHMT,GLA,KRT18,SPTBN1,SKP2,PEX2,ARG1,PSAP,YBX1,CTSA,FADS2,CTBS,PPT2	19
Carbohydrate Metabolism	catabolism	Catabolism of oligosaccharide	8.63e-07			NEU1,MAN2B2,GM2A,MANBA,CTBS	5
Lipid Metabolism, Small Molecule Biochemistry	catabolism	Catabolism of lipid	2.37e-06		1.635	PPT1,SERPINF1,SGPL1,GM2A,AP3B1,GLB1,GLA,HAO2,PSAP,PLA2G15,FABP2,MGLL,ARSA	13
Digestive System Development and Function, Hepatic System Development and Function, Organ Morphology, Organismal Development	morphology	Morphology of liver	2.55e-06			KRT8,PEX11A,PPT1,PITPNA,G6PC,STARD10,MANBA,BHMT,GLA,KRT18,SPTBN1,TKT,DPP7,SKP2,PEX2,ARG1,PSAP,YBX1,CTSA,FADS2,CTBS,FABP2,PPT2	23
Cancer, Hematological Disease, Organismal Injury and Abnormalities	myelodysplastic syndrome	Myelodysplastic syndrome	3.01e-06			RPS6,RPL13A,RPL35,CPT1A,TXNRD1,MANBA,RPL13,GAA,RPS20,RPL6,RPS16,RPS19,RPLP0,RPL5,RPL7,RPL28,RPS15A,RPL3,BCL2L1,RPL4,HRAS,MGLL	22
Lipid Metabolism, Small Molecule Biochemistry	metabolism	Fatty acid metabolism	3.23e-06	Decreased	-2.03	ITGAV,PPT1,PLSCR1,TECR,GM2A,ACSS2,CPT1A,PITPNA,VIM,GPX4,PCYT1A,SCD,PEX2,HAO2,PSAP,ACOT4,FADS2,FABP2,ARSA,PITPNB,SGPL1,ACOT12,ELOVL5,ACOT9,VNN1,THRSP,STARD5,ABCD2,ACOT2,PLA2G15,HRAS,MGLL,PPT2	33
Lipid Metabolism, Small Molecule Biochemistry	degradation	Degradation of ganglioside GM1	4.47e-06			GM2A,PSAP,GLB1	3
Cancer, Hematological Disease, Immunological Disease, Organismal Injury and Abnormalities	acute myeloid leukemia	Refractory acute myeloid leukemia	4.99e-06			LYZ,EEF1A1,RPL11,RPS24,TXNRD1,RPL3,RPS12,RPL6,RPS25	9
Carbohydrate Metabolism	metabolism	Metabolism of oligosaccharide	5.41e-06			NEU1,MAN2B2,GM2A,MANBA,GLA,CTBS	6
Neurological Disease, Organismal Injury and Abnormalities	degeneration	Degeneration of cerebellum	7.99e-06		-0.963	VIM,PPT1,PITPNA,ABCD2,PSAP,FUCA1,ARSA,PPT2	8
Lipid Metabolism, Molecular Transport, Small Molecule Biochemistry	accumulation	Accumulation of sphingolipid	8.39e-06		-1.795	SGPL1,GM2A,PSAP,BCL2L1,GLB1,GLA,ARSA	7
Cancer, Gastrointestinal Disease, Hepatic System Disease, Organismal Injury and Abnormalities	hepatitis B virus-related hepatocellular carcinoma	Hepatitis B virus-related hepatocellular carcinoma	9.76e-06			VIM,SARDH,HNRNPK,RACK1,ASS1,BHMT,RPSA	7
Cancer, Organismal Injury and Abnormalities	mucoepidermoid carcinoma	Mucoepidermoid carcinoma	1.13e-05			RPS16,TRAM1,HNRNPK,HRAS,AKAP1,KRT18,BGN	7
Lipid Metabolism, Small Molecule Biochemistry	catabolism	Catabolism of glycosphingolipid	1.15e-05	Increased	2.193	GM2A,PSAP,GLB1,GLA,ARSA	5
Cellular Assembly and Organization, Cellular Function and Maintenance	organization	Organization of intermediate filaments	1.23e-05			KRT17,VIM,Krt2,Krt10,KRT6B,KRT18	6
Lipid Metabolism, Small Molecule Biochemistry	metabolism	Metabolism of sphingolipid	1.33e-05		1.875	ORMDL2,NEU1,SGPL1,PPT1,GM2A,GLB1,GLA,SCD,PSAP,PLA2G15,BCL2L1,CTSA,ARSA	13
Developmental Disorder, Hereditary Disorder, Metabolic Disease, Organismal Injury and Abnormalities	fatty acid oxidation disorder	Fatty acid oxidation disorder	1.48e-05			PEX1,PEX6,PEX2,CPT1A,PEX12,PEX26	6
Neurological Disease	neurodegeneration	Neurodegeneration of central nervous system	1.78e-05		-0.934	VIM,PPT1,PITPNA,FUCA1,ABCD2,PSAP,BCL2L1,CNP,GLB1,PPT2,ARSA	11
Infectious Diseases	replication	Replication of RNA virus	2.1e-05		-1.868	RPL13A,RPS10,ANPEP,RPS5,PRDX1,ISG15,YBX1,PSMA1,IGKC,SRSF1,EEF1A1,RPS6,EIF3A,COPB2,SGPL1,DDB1,RPL35,RPSA,MAVS,RPS16,COPA,NCL,PLIN3,COPB1,BCL2L1,HRAS,MVP	27
Amino Acid Metabolism, Small Molecule Biochemistry	metabolism	Metabolism of amino acids	2.12e-05			DDO,HGD,AGXT,AMDHD1,ASS1,HPD,BHMT,SLC7A2,OAT,CKMT2,SARDH,MTRR,ARG1,GGH	14
Lipid Metabolism, Molecular Transport, Small Molecule Biochemistry	quantity	Quantity of glycolipid	2.45e-05		-0.013	PITPNB,AGMO,SGPL1,NUS1,PSAP,BHMT,GLB1,GLA	8
Lipid Metabolism, Molecular Transport, Small Molecule Biochemistry	accumulation	Accumulation of glycosphingolipid	2.5e-05		-1.953	GM2A,PSAP,GLB1,GLA,ARSA	5
Carbohydrate Metabolism	catabolism	Catabolism of polysaccharide	2.8e-05			GUSB,GALNS,PITPNA,G6PC,GAA,GLB1,CTBS,PRELP,CHIA	9
Lipid Metabolism, Molecular Transport, Small Molecule Biochemistry	accumulation	Accumulation of glycosylceramide	3.27e-05		-1.924	PSAP,GLB1,GLA,ARSA	4
Nervous System Development and Function, Neurological Disease, Organ Morphology, Tissue Morphology	abnormal morphology	Abnormal morphology of white matter	3.93e-05			PEX2,PITPNA,PSAP,ARSA,PPT2	5
Cancer, Endocrine System Disorders, Organismal Injury and Abnormalities	endocrine gland tumor	Endocrine gland tumor	4.04e-05		1.067	PAOX,SNTB2,RPS24,MIA3,ANPEP,RPS5,RPL26,C8A,RPL8,PCYT1A,KRT79,PSMA1,AKAP1,REXO2,KCNMA1,EEF1A1,ANO10,ANKFY1,OSTC,DPP7,CDK5RAP3,PLBD2,CWC22,BCLAF1,PLA2G15,NHLRC3,CENPE,PPT2,FUNDC2,SRSF3,SEC31B,NUFIP1,YKT6,CELSR3,AK2,DNASE2,ATP13A1,HAO2,RPS25,FRRS1,SRSF1,PITPNB,ENPP4,ACOT12,ELOVL5,GAA,FAM210B,SND1,CTSH,OS9,TACO1,RALA,EIF4E,SARS2,MVP,FDXR,RPL7A,AGPAT3,TECR,MANBA,RPL23,GYS2,SKP2,TXN2,NUTF2,ACOT4,RPL11,…	255
Neurological Disease, Organismal Injury and Abnormalities	neurodegeneration	Neurodegeneration of cerebellum	4.12e-05		-1.331	VIM,PPT1,ABCD2,PSAP,FUCA1,ARSA,PPT2	7
Lipid Metabolism, Small Molecule Biochemistry	degradation	Degradation of glycosylceramide	4.37e-05			PSAP,GLA,ARSA	3
Lipid Metabolism, Small Molecule Biochemistry	hydrolysis	Hydrolysis of ganglioside	4.37e-05			GM2A,PSAP,GLB1	3
Cell Morphology, Cellular Assembly and Organization	size	Size of granules	4.66e-05			KRT8,Krt10,RAB5A,KRT18	4
Hematological Disease, Infectious Diseases	viral hemorrhagic fever	Viral hemorrhagic fever	4.66e-05		-0.73	RPS6,RPL5,ISG15,RPL3,HRAS,MGLL	6
Cell Death and Survival	cytolysis	Cytolysis	4.89e-05		-0.847	IGKC,Nmnat3,ATP5S,Ighg2a,G6PD,CPOX,PRDX1,C8A,KRT18,MAVS,VIM,LYZ,Krt2,Ighg2b,ISG15,EIF4E,BCL2L1	17
Neurological Disease, Organismal Injury and Abnormalities	degeneration	Degeneration of brain	5.27e-05		-1.049	VIM,PPT1,PITPNA,FUCA1,ABCD2,PSAP,BCL2L1,CNP,GLB1,PPT2,ARSA	11
Infectious Diseases	replication	Replication of virus	5.43e-05		-1.856	KRT8,RPL13A,RPS10,ANPEP,RPS5,PRDX1,ISG15,YBX1,PSMA1,IGKC,SRSF1,EEF1A1,RPS6,EIF3A,COPB2,SGPL1,DDB1,RPL35,RPSA,MAVS,RPS16,COPA,NCL,PLIN3,COPB1,BCL2L1,HRAS,MVP	28
Cancer, Endocrine System Disorders, Organismal Injury and Abnormalities	thyroid gland tumor	Thyroid gland tumor	6.3e-05			PAOX,SNTB2,RPS24,MIA3,ANPEP,RPS5,RPL26,C8A,RPL8,PCYT1A,KRT79,PSMA1,AKAP1,REXO2,KCNMA1,EEF1A1,ANO10,ANKFY1,OSTC,DPP7,CDK5RAP3,PLBD2,CWC22,BCLAF1,PLA2G15,NHLRC3,CENPE,PPT2,FUNDC2,SRSF3,SEC31B,NUFIP1,YKT6,CELSR3,AK2,DNASE2,ATP13A1,HAO2,RPS25,FRRS1,PITPNB,ENPP4,ACOT12,ELOVL5,GAA,FAM210B,SND1,CTSH,OS9,TACO1,RALA,EIF4E,SARS2,MVP,FDXR,RPL7A,AGPAT3,TECR,MANBA,RPL23,GYS2,TXN2,NUTF2,ACOT4,RPL11,EIF3A,HNRNP…	251
Cancer, Endocrine System Disorders, Organismal Injury and Abnormalities	endocrine carcinoma	Endocrine carcinoma	6.39e-05			PAOX,SNTB2,RPS24,MIA3,ANPEP,RPS5,RPL26,C8A,RPL8,PCYT1A,KRT79,PSMA1,AKAP1,REXO2,KCNMA1,EEF1A1,ANO10,ANKFY1,OSTC,DPP7,CDK5RAP3,PLBD2,CWC22,BCLAF1,PLA2G15,NHLRC3,CENPE,PPT2,FUNDC2,SRSF3,SEC31B,NUFIP1,YKT6,CELSR3,AK2,DNASE2,ATP13A1,HAO2,RPS25,FRRS1,PITPNB,ENPP4,ACOT12,ELOVL5,GAA,FAM210B,SND1,CTSH,OS9,TACO1,RALA,EIF4E,SARS2,MVP,FDXR,RPL7A,AGPAT3,TECR,MANBA,RPL23,GYS2,SKP2,TXN2,NUTF2,ACOT4,RPL11,EIF3A,…	251
Cell Morphology, Embryonic Development, Hair and Skin Development and Function, Organ Development, Organismal Development, Tissue Development	keratinization	Keratinization of epidermis	6.66e-05			KRT17,KRT8,KRT6B,KRT1,KRT79,KRT76,KRT13,KRT72,KRT5,KRT73,KRT18	11
Cancer, Endocrine System Disorders, Organismal Injury and Abnormalities	epithelial thyroid cancer	Thyroid carcinoma	7.13e-05			PAOX,SNTB2,RPS24,MIA3,ANPEP,RPS5,RPL26,C8A,RPL8,PCYT1A,KRT79,PSMA1,AKAP1,REXO2,KCNMA1,EEF1A1,ANO10,ANKFY1,OSTC,DPP7,CDK5RAP3,PLBD2,CWC22,BCLAF1,PLA2G15,NHLRC3,CENPE,PPT2,FUNDC2,SRSF3,SEC31B,NUFIP1,YKT6,CELSR3,AK2,DNASE2,ATP13A1,HAO2,RPS25,FRRS1,PITPNB,ENPP4,ACOT12,ELOVL5,GAA,FAM210B,SND1,CTSH,OS9,TACO1,RALA,EIF4E,SARS2,MVP,FDXR,RPL7A,AGPAT3,TECR,MANBA,RPL23,GYS2,TXN2,NUTF2,ACOT4,RPL11,EIF3A,HNRNP…	250
Lipid Metabolism, Small Molecule Biochemistry	synthesis	Synthesis of lipid	7.41e-05	Decreased	-2.078	FDXR,PEX7,ACP6,PLSCR1,PPT1,AGPAT3,ACSS2,TECR,G6PC,ANPEP,GLA,VIM,GPX4,PCYT1A,SCD,PEX2,SYNJ2,YBX1,FMO3,FADS2,ARSA,G6PD,EEF1A1,RAB4A,SGPL1,NUS1,RAB5A,STARD10,SET,ELOVL5,BHMT,DDX25,ETNPPL,THRSP,AGMO,RALA,BCL2L1,PPT2	38
Infectious Diseases	infection	Infection of cells	7.42e-05	Decreased	-2.601	HNRNPF,TECR,GM2A,SEC61G,MANBA,SPTBN1,RPL12,RPL5,TPT1,RPL3,SYNJ2,YBX1,RTN3,PSMA1,CXADR,DDO,SRSF6,TANK,UBE2L3,RPS6,EIF3A,RACK1,COPB2,HNRNPK,TOMM70,RAB5A,KRT18,COPA,COPB1,BCLAF1,HRAS,MGLL,ETF1,RPL10A,SPTAN1,CTSZ	36
Neurological Disease, Organismal Injury and Abnormalities	neurodegeneration	Neurodegeneration of brain	7.97e-05		-1.312	VIM,PPT1,FUCA1,ABCD2,PSAP,BCL2L1,CNP,GLB1,PPT2,ARSA	10
Lipid Metabolism, Small Molecule Biochemistry	cleavage	Cleavage of glycosphingolipid	8.61e-05	Increased	2.2	GM2A,PSAP,GLB1,GLA,ARSA	5
Lipid Metabolism, Small Molecule Biochemistry	storage	Storage of glycosphingolipid	8.62e-05			GM2A,GLA,ARSA	3
Amino Acid Metabolism, Small Molecule Biochemistry	synthesis	Synthesis of sulfur amino acid	8.66e-05			SARDH,AGXT,MTRR,BHMT	4
Lipid Metabolism, Small Molecule Biochemistry	homeostasis	Homeostasis of lipid	8.8e-05			SGPL1,PLSCR1,NUS1,G6PC,STARD10,THRSP,SCD,PEX2,PLIN3,PSAP,MGLL,FABP2,TMEM97,ARSA	14
Lipid Metabolism, Small Molecule Biochemistry	metabolism	Metabolism of glycosphingolipid	9.65e-05		1.43	NEU1,SGPL1,GM2A,PSAP,CTSA,GLB1,GLA,ARSA	8
Cancer, Organismal Injury and Abnormalities	cancer	Cancer	9.79e-05	Increased	3.238	PAOX,SNTB2,RPS24,MIA3,ANPEP,RPS5,RPL26,C8A,RPS13,RPL8,PCYT1A,KRT79,PSMA1,RPL14,AKAP1,REXO2,IGKC,KCNMA1,EEF1A1,RPS18,ANO10,ANKFY1,OSTC,LYZ,DPP7,CDK5RAP3,PLBD2,CWC22,NUDT8,BCLAF1,PLA2G15,NHLRC3,CENPE,PPT2,TMEM97,FUNDC2,SRSF3,SEC31B,NUFIP1,SEC61G,YKT6,CELSR3,TMEM109,AK2,DNASE2,RPL5,SNAP23,RPL38,ATP13A1,Rps3a1,HAO2,RPS4Y1,SMPDL3A,RPS25,FRRS1,SRSF1,PITPNB,ORMDL2,ENPP4,ACOT12,OXNAD1,SET,ELOVL5,GAA,FAM2…	328
Cancer, Organismal Injury and Abnormalities	neck neoplasm	Neck neoplasm	0.000105			PAOX,SNTB2,RPS24,MIA3,ANPEP,RPS5,RPL26,C8A,RPL8,PCYT1A,KRT79,PSMA1,AKAP1,REXO2,KCNMA1,EEF1A1,ANO10,ANKFY1,OSTC,DPP7,CDK5RAP3,PLBD2,CWC22,BCLAF1,PLA2G15,NHLRC3,CENPE,PPT2,FUNDC2,SRSF3,SEC31B,NUFIP1,YKT6,CELSR3,AK2,DNASE2,ATP13A1,HAO2,RPS25,FRRS1,PITPNB,ENPP4,ACOT12,ELOVL5,GAA,FAM210B,SND1,CTSH,OS9,TACO1,RALA,EIF4E,SARS2,MVP,FDXR,RPL7A,AGPAT3,TECR,MANBA,RPL23,GYS2,TXN2,NUTF2,ACOT4,RPL11,EIF3A,HNRNP…	252
Dermatological Diseases and Conditions, Organismal Injury and Abnormalities	psoriasis	Psoriasis	0.000106			KRT17,PLSCR1,GM2A,SEC61G,GARS,ISG15,KRT79,ARG1,PSAP,KRT5,FADS2,EEF1A1,KRT1,COPB2,PEX19,RAB5A,ELOVL5,EIF5,KRT18,VNN1,THRSP,KRT6B,RER1,SCO2,EIF4E,BCL2L1,ETF1,SPTAN1	28
Lipid Metabolism, Molecular Transport, Small Molecule Biochemistry	concentration	Concentration of lipid	0.00011		-0.802	ACP6,CPT1A,PITPNA,G6PC,GLB1,GLA,Pcmt1,PCYT1A,SCD,PDK2,PEX2,PSAP,ZPR1,FMO3,FADS2,FABP2,KCNMA1,PITPNB,EEF1A1,PEX11A,NEU1,SGPL1,NUS1,STARD10,ELOVL5,BHMT,DDX25,VNN1,DPP7,THRSP,AGMO,ABCD2,ACOT2,FUCA1,BCL2L1,PLA2G15,HRAS,MGLL	38
Infectious Diseases	infection	Infection by RNA virus	0.000118	Decreased	-2.435	KRT8,HNRNPF,TECR,GM2A,SEC61G,MANBA,SPTBN1,RPL12,RPL5,TPT1,ISG15,RPL3,SYNJ2,YBX1,RTN3,PSMA1,DDO,SRSF6,TANK,RPS6,UBE2L3,COPB2,EIF3A,RACK1,HNRNPK,TOMM70,RAB5A,GAA,KRT18,AMY2A,COPA,COPB1,BCLAF1,BCL2L1,HRAS,MGLL,ETF1,RPL10A,SPTAN1,CTSZ	40
Amino Acid Metabolism, Small Molecule Biochemistry	metabolism	Metabolism of L-amino acid	0.000133			DDO,HGD,AMDHD1,MTRR,ASS1,AGXT,HPD,BHMT	8
Cardiovascular Disease, Hematological Disease, Organismal Injury and Abnormalities	anemia	Anemia	0.00014		0.281	Nmnat3,G6PD,RPS6,RPS10,RPS26,RPL11,CPOX,RPS24,TXNRD1,RPS7,RPL35A,PRDX1,RPL26,DNASE2,Ighg2b,RPS19,RPL5,RPS17,MTRR,RPS28,BCL2L1,RPL27,MGLL	23
Cellular Assembly and Organization	organization	Organization of organelle	0.000148		-0.152	KRT17,PEX7,PPT1,MIA3,CNP,AFG1L,SPTBN1,VIM,RPS19,GPX4,Krt10,PEX2,Tpm1,PEX12,PARL,CXADR,ARSB,PITPNB,PEX11A,PEX19,VPS35,RAB5A,GAA,KRT18,Krt2,PEX1,KRT6B,PEX6,ARL1,BGN	30
Infectious Diseases	infection	Infection by Human parainfluenza virus 3	0.000149			COPA,COPB2,COPB1	3
Lipid Metabolism, Molecular Transport, Small Molecule Biochemistry	quantity	Quantity of palmitoleic acid	0.000149			SCD,G6PC,ELOVL5	3
Cell Morphology, Cellular Assembly and Organization	size	Size of secretory granules	0.000149			KRT8,RAB5A,KRT18	3
Metabolic Disease	mitochondrial disorder	Mitochondrial disorder	0.000151			FDXR,FARS2,GALNS,NDUFAF6,TXN2,SLC25A4,TACO1,DGUOK,SCO2,COA7,COX20,EARS2	12
Lipid Metabolism, Molecular Transport, Small Molecule Biochemistry	quantity	Quantity of glycosphingolipid	0.000156		0.272	PITPNB,AGMO,SGPL1,PSAP,BHMT,GLB1,GLA	7
Cell Cycle	G1 phase	G1 phase of tumor cell lines	0.000158			CREG1,RPL7A,SRSF3,RPS6,ITGAV,RPL11,RACK1,PLSCR1,RPL23,CDK5RAP3,RPL5,SKP2,BCL2L1,KRT13,HRAS,SPTAN1	16
Lipid Metabolism, Molecular Transport, Small Molecule Biochemistry	accumulation	Accumulation of lipid	0.000184		0.015	SGPL1,AP3B1,GM2A,CPT1A,PITPNA,ELOVL5,BHMT,Mup1 (includes others),GLB1,GLA,PCYT1A,SCD,PEX2,ABCD2,PSAP,BCL2L1,MGLL,ARSA	18
Lipid Metabolism, Small Molecule Biochemistry	metabolism	Metabolism of very long chain fatty acid	0.000187			PEX2,ACOT2,ABCD2,ACOT4	4
Cell Cycle	G1/S phase transition	Arrest in G1/S phase transition of tumor cell lines	0.000188			RPL5,ITGAV,RPL11,RPL23,KRT13,HRAS	6
Cell Morphology	keratinization	Keratinization	0.000189			KRT17,VIM,KRT8,KRT6B,KRT1,KRT79,KRT76,KRT13,KRT72,KRT5,KRT73,KRT18	12
Carbohydrate Metabolism, Lipid Metabolism, Molecular Transport, Small Molecule Biochemistry	concentration	Concentration of phosphatidylcholine	0.000209		-1.54	THRSP,AGMO,PCYT1A,SCD,FMO3,BHMT	6
Neurological Disease, Organismal Injury and Abnormalities	leukoencephalopathy	Leukoencephalopathy	0.000223			DARS2,PEX7,NDUFAF6,RNASET2,ABCD2,PSAP,SCO2,SNAP29,ARSA	9
Lipid Metabolism, Molecular Transport, Small Molecule Biochemistry	quantity	Quantity of sphingolipid	0.000223		0.047	PITPNB,AGMO,SGPL1,SCD,PSAP,BHMT,HRAS,GLB1,GLA	9
Lipid Metabolism, Molecular Transport, Small Molecule Biochemistry	concentration	Concentration of sphingomyelin	0.000225		0.849	PITPNB,AGMO,SGPL1,BHMT,GLB1	5
Cellular Assembly and Organization	quantity	Quantity of secretory granules	0.000233		1.067	KRT8,RAB5A,RALA,KRT18	4
Infectious Diseases	replication	Replication of Influenza A virus	0.000235	Decreased	-2.982	EEF1A1,RPS10,RPL13A,EIF3A,SGPL1,COPB2,RPL35,ANPEP,RPS5,RPSA,RPS16,COPA,ISG15,COPB1,PSMA1,HRAS	16
Lipid Metabolism, Molecular Transport, Small Molecule Biochemistry	quantity	Quantity of oleic acid	0.000236			SCD,G6PC,ELOVL5	3
Developmental Disorder, Hereditary Disorder, Metabolic Disease, Organismal Injury and Abnormalities	alkaptonuria	Alkaptonuria	0.000272			HGD,HPD	2
Carbohydrate Metabolism	biosynthesis	Biosynthesis of D-ribose-5-phosphate	0.000272			TKT,G6PD	2
Cellular Compromise, Embryonic Development, Hair and Skin Development and Function, Organ Development, Organismal Development, Tissue Development	collapse	Collapse of keratin intermediate filaments	0.000272			KRT8,KRT18	2
Gastrointestinal Disease, Hepatic System Disease, Organismal Injury and Abnormalities	cryptogenic cirrhosis	Cryptogenic cirrhosis	0.000272			KRT8,KRT18	2
Lipid Metabolism, Small Molecule Biochemistry	degradation	Degradation of globotriaosylceramide	0.000272			PSAP,GLA	2
Lipid Metabolism, Small Molecule Biochemistry	degradation	Degradation of lactosylceramide	0.000272			PSAP,GLB1	2
Cellular Assembly and Organization, Cellular Compromise, Cellular Development, Cellular Growth and Proliferation, Digestive System Development and Function, Embryonic Development, Hepatic System Development and Function, Organ Development, Organismal Development, Tissue Development	formation	Formation of Mallory bodies	0.000272			KRT8,KRT18	2
Developmental Disorder, Hereditary Disorder, Metabolic Disease, Neurological Disease, Organismal Injury and Abnormalities	GM1 gangliosidosis type 1	GM1 gangliosidosis type 1	0.000272			PSAP,GLB1	2
Developmental Disorder, Hereditary Disorder, Metabolic Disease, Neurological Disease, Organismal Injury and Abnormalities	GM1 gangliosidosis type 2	GM1 gangliosidosis type 2	0.000272			PSAP,GLB1	2
Auditory Disease, Dental Disease, Dermatological Diseases and Conditions, Developmental Disorder, Gastrointestinal Disease, Hereditary Disorder, Metabolic Disease, Neurological Disease, Organismal Injury and Abnormalities, Skeletal and Muscular Disorders	Heimler syndrome	Heimler syndrome	0.000272			PEX1,PEX6	2
Cellular Function and Maintenance	metabolism	Metabolism by hepatocytes	0.000272			THRSP,G6PC	2
Developmental Disorder, Hereditary Disorder, Metabolic Disease, Neurological Disease, Organismal Injury and Abnormalities, Psychological Disorders	metachromatic leukodystrophy	Metachromatic leukodystrophy	0.000272			PSAP,ARSA	2
Connective Tissue Disorders, Developmental Disorder, Hereditary Disorder, Metabolic Disease, Organismal Injury and Abnormalities, Skeletal and Muscular Disorders	mucopolysaccharidosis type IV	Mucopolysaccharidosis type IV	0.000272			GALNS,GLB1	2
Lipid Metabolism, Molecular Transport, Small Molecule Biochemistry	recycling	Recycling of lactosylceramide	0.000272			RAB4A,SGPL1	2
Developmental Disorder, Hereditary Disorder, Metabolic Disease, Neurological Disease, Organismal Injury and Abnormalities	sialidosis	Sialidosis	0.000272			NEU1,CTSA	2
Cell Morphology, Cellular Assembly and Organization, Digestive System Development and Function, Organ Morphology, Organismal Development	size	Size of zymogen granules	0.000272			KRT8,KRT18	2
Cellular Assembly and Organization, Hair and Skin Development and Function	stabilization	Stabilization of keratin intermediate filaments	0.000272			KRT8,KRT18	2
Carbohydrate Metabolism, Small Molecule Biochemistry	storage	Storage of glycosaminoglycan	0.000272			GUSB,ARSB	2
Gastrointestinal Disease, Hepatic System Disease, Organismal Injury and Abnormalities	susceptibility to noncryptogenic cirrhosis	Susceptibility to noncryptogenic cirrhosis	0.000272			KRT8,KRT18	2
Cell Morphology, Hematological System Development and Function, Inflammatory Response	morphology	Morphology of macrophages	0.000292			DNASE2,MANBA,ABCD2,PSAP,PLA2G15,GLA,CTBS,ARSA	8
Hematological Disease, Infectious Diseases	Ebola hemorrhagic fever	Ebola hemorrhagic fever	0.000296		-1.133	RPS6,RPL5,RPL3,HRAS,MGLL	5
Cellular Development, Cellular Growth and Proliferation, Digestive System Development and Function	proliferation	Proliferation of intestinal cell lines	0.000296		0.555	ITGAV,SERPINF1,PCYT1A,RACK1,HRAS	5
Neurological Disease	neurodegeneration	Neurodegeneration	0.000346		0.01	Nmnat3,KCNMA1,FTL,PPT1,PITPNA,CNP,GLB1,MAVS,VIM,GPX4,PARL,FUCA1,ABCD2,PSAP,ZPR1,BCL2L1,PPT2,ARSA	18
Lipid Metabolism, Molecular Transport, Small Molecule Biochemistry	concentration	Concentration of phospholipid	0.000347		-0.658	EEF1A1,PITPNB,ACP6,SGPL1,STARD10,BHMT,GLB1,THRSP,AGMO,PCYT1A,SCD,FMO3,HRAS	13
Developmental Disorder, Hereditary Disorder, Metabolic Disease, Neurological Disease, Organismal Injury and Abnormalities	gangliosidosis	Gangliosidosis	0.000349			GM2A,PSAP,GLB1	3
Infectious Diseases	infection	Infection by Marburg virus	0.000349			RPL5,RPS6,RPL3	3
Hematological Disease, Infectious Diseases	infection	Infection by Zaire ebolavirus	0.000351		-0.747	RPL5,RPS6,RPL3,HRAS	4
Cell Morphology, Hematological System Development and Function, Immunological Disease, Inflammatory Response	abnormal morphology	Abnormal morphology of macrophages	0.000358			DNASE2,MANBA,ABCD2,PSAP,PLA2G15,CTBS,ARSA	7
Lipid Metabolism, Small Molecule Biochemistry	synthesis	Synthesis of phospholipid	0.000374		-0.676	EEF1A1,PEX7,ACP6,RAB4A,SGPL1,PLSCR1,AGPAT3,RAB5A,STARD10,ETNPPL,GPX4,PCYT1A,RALA,SYNJ2	14
Lipid Metabolism, Small Molecule Biochemistry	metabolism	Metabolism of phospholipid	0.000388		-0.332	EEF1A1,PEX7,ACP6,RAB4A,SGPL1,PLSCR1,AGPAT3,AP3B1,RAB5A,STARD10,ETNPPL,GPX4,PCYT1A,RALA,SYNJ2,PLA2G15	16
Lipid Metabolism, Molecular Transport, Small Molecule Biochemistry	concentration	Concentration of triacylglycerol	0.000408		-0.165	PEX11A,NEU1,SGPL1,PITPNA,G6PC,STARD10,ELOVL5,BHMT,VNN1,Pcmt1,THRSP,PCYT1A,SCD,PDK2,ZPR1,FMO3,FADS2,MGLL	18
Cancer, Organismal Injury and Abnormalities	head and neck neoplasia	Head and neck tumor	0.000408			PAOX,SNTB2,RPS24,MIA3,ANPEP,RPS5,RPL26,C8A,RPL8,PCYT1A,KRT79,PSMA1,RPL14,AKAP1,REXO2,KCNMA1,EEF1A1,ANO10,ANKFY1,OSTC,DPP7,CDK5RAP3,PLBD2,CWC22,BCLAF1,PLA2G15,NHLRC3,CENPE,PPT2,FUNDC2,SRSF3,SEC31B,NUFIP1,YKT6,CELSR3,AK2,DNASE2,ATP13A1,HAO2,RPS25,FRRS1,SRSF1,PITPNB,ENPP4,ACOT12,SET,ELOVL5,GAA,FAM210B,SND1,CTSH,OS9,TACO1,RALA,EIF4E,SARS2,MVP,FDXR,RPL7A,AGPAT3,TECR,MANBA,RPL23,GYS2,SKP2,TXN2,NUTF2,AC…	261
Cancer, Organismal Injury and Abnormalities, Respiratory Disease	advanced lung cancer	Advanced lung cancer	0.000425		-0.626	KCNMA1,KRT8,EEF1A1,RPS6,FTL,SEC61G,ANPEP,SND1,RPL7,TPT1,SKP2,EIF4E,HRAS,RPL27,CTSZ	15
Lipid Metabolism, Molecular Transport, Small Molecule Biochemistry	concentration	Concentration of acylglycerol	0.000427		0.528	PEX11A,NEU1,SGPL1,PITPNA,G6PC,STARD10,ELOVL5,BHMT,VNN1,Pcmt1,THRSP,PCYT1A,SCD,PDK2,ZPR1,FMO3,HRAS,FADS2,MGLL	19
Lipid Metabolism, Molecular Transport, Small Molecule Biochemistry	concentration	Concentration of cholesterol	0.000438	Decreased	-2.056	NEU1,SGPL1,G6PC,STARD10,BHMT,DDX25,GLA,VNN1,Pcmt1,PCYT1A,SCD,PEX2,FUCA1,PLA2G15,FMO3,MGLL,FABP2	17
Cancer, Organismal Injury and Abnormalities	head and neck carcinoma	Head and neck carcinoma	0.000458			PAOX,SNTB2,RPS24,MIA3,ANPEP,RPS5,RPL26,C8A,RPL8,PCYT1A,KRT79,PSMA1,RPL14,AKAP1,REXO2,KCNMA1,EEF1A1,ANO10,ANKFY1,OSTC,DPP7,CDK5RAP3,PLBD2,CWC22,BCLAF1,PLA2G15,NHLRC3,CENPE,PPT2,FUNDC2,SRSF3,SEC31B,NUFIP1,YKT6,CELSR3,AK2,DNASE2,ATP13A1,HAO2,RPS25,FRRS1,PITPNB,ENPP4,ACOT12,ELOVL5,GAA,FAM210B,SND1,CTSH,OS9,TACO1,RALA,EIF4E,SARS2,MVP,FDXR,RPL7A,AGPAT3,TECR,MANBA,RPL23,GYS2,TXN2,NUTF2,ACOT4,RPL11,EIF3A…	257
Infectious Diseases	flu	Flu	0.000483			RPS13,AMY2A,RPL38,RAB5A,RPS23,ABCD2,RPS20	7
Lipid Metabolism, Small Molecule Biochemistry	elongation	Elongation of fatty acid	0.000492			TECR,PECR,ABCD2	3
Cell Cycle	G1 phase	G1 phase of ovarian cancer cell lines	0.000492			ITGAV,SKP2,BCL2L1	3
Cancer, Organismal Injury and Abnormalities	head and neck cancer	Head and neck cancer	0.000495			PAOX,SNTB2,RPS24,MIA3,ANPEP,RPS5,RPL26,C8A,RPL8,PCYT1A,KRT79,PSMA1,RPL14,AKAP1,REXO2,KCNMA1,EEF1A1,ANO10,ANKFY1,OSTC,DPP7,CDK5RAP3,PLBD2,CWC22,BCLAF1,PLA2G15,NHLRC3,CENPE,PPT2,FUNDC2,SRSF3,SEC31B,NUFIP1,YKT6,CELSR3,AK2,DNASE2,ATP13A1,HAO2,RPS25,FRRS1,PITPNB,ENPP4,ACOT12,SET,ELOVL5,GAA,FAM210B,SND1,CTSH,OS9,TACO1,RALA,EIF4E,SARS2,MVP,FDXR,RPL7A,AGPAT3,TECR,MANBA,RPL23,GYS2,TXN2,NUTF2,ACOT4,RPL11,E…	258
Cellular Function and Maintenance	pinocytosis	Pinocytosis	0.000551		0.492	PPT1,NCL,RAB5A,HRAS,ANKFY1	5
Cellular Assembly and Organization	quantity	Quantity of granules	0.000551		1.387	KRT8,RAB5A,RALA,YBX1,KRT18	5
Cell Morphology, Digestive System Development and Function, Hepatic System Development and Function, Organ Morphology, Organismal Development	morphology	Morphology of liver cells	0.000584			KRT8,PEX11A,SKP2,PITPNA,MANBA,ARG1,PSAP,CTBS	8
Cell Cycle	interphase	Interphase of ovarian cancer cell lines	0.0006			ITGAV,SKP2,BCL2L1,HRAS	4
Cancer, Organismal Injury and Abnormalities	non-melanoma solid tumor	Non-melanoma solid tumor	0.000616		-0.898	PAOX,SNTB2,RPS24,MIA3,ANPEP,RPS5,RPL26,C8A,RPS13,RPL8,PCYT1A,KRT79,PSMA1,RPL14,AKAP1,REXO2,IGKC,KCNMA1,EEF1A1,RPS18,ANO10,ANKFY1,OSTC,LYZ,DPP7,CDK5RAP3,PLBD2,CWC22,NUDT8,BCLAF1,PLA2G15,NHLRC3,CENPE,PPT2,TMEM97,FUNDC2,SRSF3,SEC31B,NUFIP1,SEC61G,YKT6,CELSR3,TMEM109,AK2,DNASE2,RPL5,SNAP23,ATP13A1,HAO2,RPS4Y1,SMPDL3A,RPS25,FRRS1,SRSF1,PITPNB,ORMDL2,ENPP4,ACOT12,OXNAD1,SET,ELOVL5,GAA,FAM210B,MAVS,SND1…	316
Amino Acid Metabolism, Small Molecule Biochemistry	metabolism	Metabolism of essential amino acids	0.000617			HGD,AMDHD1,MTRR,HPD,BHMT	5
Lipid Metabolism, Molecular Transport, Small Molecule Biochemistry	accumulation	Accumulation of cerebroside	0.000669			PSAP,GLB1,ARSA	3
Protein Synthesis	catabolism	Catabolism of peptide	0.000669			IDE,ANPEP,CPQ	3
Cellular Function and Maintenance	homeostasis	Homeostasis of red blood cells	0.000669			RPS17,RPS24,PRDX1	3
Lipid Metabolism, Small Molecule Biochemistry	synthesis	Synthesis of very long chain fatty acid	0.000669			TECR,ELOVL5,FADS2	3
Metabolic Disease	disorder of lipid metabolism	Disorder of lipid metabolism	0.000693		-0.781	SERPINF1,GM2A,PITPNA,CPT1A,PEX26,GLA,PEX1,PEX6,PCYT1A,SCD,PEX2,PEX12,PSAP,HRAS,ARSA	15
Developmental Disorder, Hereditary Disorder, Metabolic Disease, Organismal Injury and Abnormalities	cytochrome c oxidase deficiency	Cytochrome c oxidase deficiency	0.000705			TACO1,SCO2,COA7,COX20	4
Lipid Metabolism, Small Molecule Biochemistry	storage	Storage of lipid	0.000732		-1.482	ITGAV,SCD,GM2A,PEX2,Mup1 (includes others),GLA,ARSA	7
Cell Morphology	morphology	Morphology of antigen presenting cells	0.000738			DNASE2,MANBA,ABCD2,PSAP,PLA2G15,GLA,CTBS,CTSZ,ARSA	9
Carbohydrate Metabolism, Lipid Metabolism, Small Molecule Biochemistry	metabolism	Metabolism of phosphatidic acid	0.000755		-0.64	EEF1A1,ACP6,RAB4A,PLSCR1,AGPAT3,AP3B1,RAB5A,STARD10,ETNPPL,PCYT1A,RALA,SYNJ2,PLA2G15	13
Lipid Metabolism, Molecular Transport, Small Molecule Biochemistry	accumulation	Accumulation of globotriaosylceramide	0.000808			PSAP,GLA	2
Cellular Assembly and Organization, Nervous System Development and Function	assembly	Assembly of axon initial segments	0.000808			SPTBN1,SPTAN1	2
Dermatological Diseases and Conditions, Developmental Disorder, Hereditary Disorder, Organismal Injury and Abnormalities, Skeletal and Muscular Disorders	pachyonychia congenita	Autosomal dominant pachyonychia congenita	0.000808			KRT17,KRT6B	2
Carbohydrate Metabolism, Small Molecule Biochemistry	binding	Binding of chondroitin sulfate	0.000808			GUSB,GALNS	2
Carbohydrate Metabolism, Small Molecule Biochemistry	catabolism	Catabolism of chitin	0.000808			CTBS,CHIA	2
Cell Morphology, Cellular Function and Maintenance	depolarization	Depolarization of hepatocytes	0.000808			BCL2L1,HRAS	2
Cancer, Cardiovascular Disease, Connective Tissue Disorders, Developmental Disorder, Hematological Disease, Hereditary Disorder, Organismal Injury and Abnormalities, Skeletal and Muscular Disorders	Diamond-Blackfan anemia type 15 with mandibulofacial dysostosis	Diamond-Blackfan anemia type 15 with mandibulofacial dysostosis	0.000808			RPS26,RPS28	2
Lipid Metabolism, Small Molecule Biochemistry	hydrolysis	Hydrolysis of ganglioside GM1	0.000808			PSAP,GLB1	2
Cellular Assembly and Organization, Cellular Function and Maintenance	organization	Organization of keratin intermediate filaments	0.000808			KRT6B,KRT18	2
Connective Tissue Disorders, Developmental Disorder, Hereditary Disorder, Metabolic Disease, Organismal Injury and Abnormalities, Skeletal and Muscular Disorders	peroxisome biogenesis disorder complementation group 11	Peroxisome biogenesis disorder complementation group 11	0.000808			PEX7,PEX1	2
Digestive System Development and Function, Gastrointestinal Disease, Hepatic System Development and Function, Hepatic System Disease, Infectious Diseases, Inflammatory Disease, Inflammatory Response, Organ Development, Organismal Injury and Abnormalities	susceptibility to hepatitis C virus	Susceptibility to hepatitis C virus	0.000808			KRT8,KRT18	2
Lipid Metabolism, Small Molecule Biochemistry	hydrolysis	Hydrolysis of glycosphingolipid	0.000822			GM2A,PSAP,GLB1,ARSA	4
Lipid Metabolism, Nucleic Acid Metabolism, Small Molecule Biochemistry	synthesis	Synthesis of acyl-coenzyme A	0.000822			PPT1,SCD,ACSS2,PPT2	4
Lipid Metabolism, Molecular Transport, Small Molecule Biochemistry	accumulation	Accumulation of ganglioside	0.000881			GM2A,PSAP,GLB1	3
Carbohydrate Metabolism, Small Molecule Biochemistry	catabolism	Catabolism of keratan sulfate	0.000881			GALNS,GLB1,PRELP	3
Cell Morphology, Digestive System Development and Function, Gastrointestinal Disease, Hepatic System Development and Function, Hepatic System Disease, Organ Morphology, Organismal Development, Organismal Injury and Abnormalities, Tissue Morphology	abnormal morphology	Abnormal morphology of hepatocytes	0.00089			KRT8,PEX11A,SKP2,PITPNA,MANBA,ARG1,PSAP	7
Cancer, Organismal Injury and Abnormalities	tumorigenesis	Tumorigenesis of tissue	0.000926		-0.61	PAOX,SNTB2,RPS24,MIA3,ANPEP,RPS5,RPL26,C8A,RPS13,RPL8,PCYT1A,KRT79,PSMA1,RPL14,AKAP1,REXO2,KCNMA1,EEF1A1,RPS18,ANO10,ANKFY1,OSTC,LYZ,DPP7,CDK5RAP3,PLBD2,CWC22,NUDT8,BCLAF1,PLA2G15,NHLRC3,CENPE,PPT2,TMEM97,FUNDC2,SRSF3,SEC31B,NUFIP1,SEC61G,YKT6,CELSR3,TMEM109,AK2,DNASE2,RPL5,SNAP23,ATP13A1,HAO2,SMPDL3A,RPS25,FRRS1,SRSF1,PITPNB,ORMDL2,ENPP4,ACOT12,OXNAD1,SET,ELOVL5,GAA,FAM210B,MAVS,SND1,CTSH,THRSP,…	314
Lipid Metabolism, Molecular Transport, Small Molecule Biochemistry	accumulation	Accumulation of fatty acid	0.000942		1.287	SCD,PEX2,PITPNA,ABCD2,ELOVL5	5
Energy Production, Lipid Metabolism, Small Molecule Biochemistry	oxidation	Oxidation of fatty acid	0.000945		-1.41	PEX7,IDE,SCD,SERPINF1,PDK2,PEX2,CPT1A,HAO2,PECR,ABCD2,FABP2	11
Carbohydrate Metabolism	incorporation	Incorporation of carbohydrate	0.000952			PCYT1A,SCD,CPT1A,G6PC	4
Molecular Transport, Protein Trafficking	internalization	Internalization of protein	0.000966	Decreased	-2.215	PEX7,PEX1,PEX6,RAB5A,PEX26,ZPR1,NUTF2,PTTG1IP	8
Cell Morphology, Nervous System Development and Function, Neurological Disease, Organ Morphology, Organismal Development, Organismal Injury and Abnormalities, Tissue Morphology	abnormal morphology	Abnormal morphology of Purkinje cells	0.000975			PEX2,GM2A,PITPNA,ABCD2,PSAP,ARSA	6
Cell Morphology, Nervous System Development and Function, Organ Morphology, Organismal Development	morphology	Morphology of brain cells	0.00101			Pcmt1,PPT1,GM2A,VPS35,PEX2,PITPNA,MANBA,ABCD2,PSAP,ARSA	10
Cell Cycle	G1 phase	Arrest in G1 phase of tumor cell lines	0.00102			RPL7A,CDK5RAP3,SRSF3,RPL5,RPS6,ITGAV,RPL11,PLSCR1,RPL23,KRT13,HRAS,SPTAN1	12
Molecular Transport, Protein Trafficking	import	Import of protein	0.00107		-1.981	PEX7,PEX1,PEX6,PEX26,ZPR1,NUTF2,PTTG1IP	7
Amino Acid Metabolism, Small Molecule Biochemistry	synthesis	Synthesis of amino acids	0.00107			OAT,SARDH,MTRR,ASS1,AGXT,ARG1,BHMT	7
Lipid Metabolism, Small Molecule Biochemistry	metabolism	Metabolism of triacylglycerol	0.00107			THRSP,AGMO,SERPINF1,SCD,CPT1A,G6PC,BHMT,FABP2	8
Lipid Metabolism, Molecular Transport, Small Molecule Biochemistry	concentration	Concentration of long chain fatty acid	0.0011		0.183	THRSP,SCD,G6PC,ELOVL5	4
Cancer, Organismal Injury and Abnormalities	carcinoma	Carcinoma	0.00111		-0.736	PAOX,SNTB2,RPS24,MIA3,ANPEP,RPS5,RPL26,C8A,RPL8,PCYT1A,KRT79,PSMA1,RPL14,AKAP1,REXO2,KCNMA1,EEF1A1,RPS18,ANO10,ANKFY1,OSTC,LYZ,DPP7,CDK5RAP3,PLBD2,CWC22,NUDT8,BCLAF1,PLA2G15,NHLRC3,CENPE,PPT2,TMEM97,FUNDC2,SRSF3,SEC31B,NUFIP1,SEC61G,YKT6,CELSR3,TMEM109,AK2,DNASE2,RPL5,SNAP23,ATP13A1,HAO2,SMPDL3A,RPS25,FRRS1,SRSF1,PITPNB,ORMDL2,ENPP4,ACOT12,OXNAD1,SET,ELOVL5,GAA,FAM210B,MAVS,SND1,CTSH,THRSP,OS9,DD…	312
Cell Cycle	G1/S phase transition	G1/S phase transition of tumor cell lines	0.00113			CREG1,RPL5,ITGAV,RACK1,RPL11,RPL23,KRT13,HRAS	8
Carbohydrate Metabolism, Nucleic Acid Metabolism, Small Molecule Biochemistry	pentose shunt	Pentose shunt of D-glucose	0.00113			TKT,G6PD,TALDO1	3
Cell Death and Survival, Cellular Compromise, Neurological Disease, Organismal Injury and Abnormalities, Tissue Morphology	neurodegeneration	Neurodegeneration of Purkinje cells	0.00126		-1.446	PPT1,ABCD2,PSAP,FUCA1,ARSA	5
Amino Acid Metabolism, Small Molecule Biochemistry	synthesis	Synthesis of alpha-amino acid	0.00138			SARDH,AGXT,MTRR,ARG1,BHMT	5
Cell Cycle	G1/S phase transition	Arrest in G1/S phase transition of bone cancer cell lines	0.00142			RPL5,RPL11,RPL23	3
Cell Cycle	G1/S phase transition	Arrest in G1/S phase transition of sarcoma cell lines	0.00142			RPL5,RPL11,RPL23	3
Carbohydrate Metabolism	cleavage	Cleavage of polysaccharide	0.00142			LYZ,GLB1,CHIA	3
Cardiovascular Disease, Organismal Injury and Abnormalities	diastolic dysfunction	Diastolic dysfunction of heart	0.00142			SCD,Tpm1,HRAS	3
Small Molecule Biochemistry	quantity	Quantity of ammonia in blood	0.00142			OAT,ASS1,ARG1	3
Post-Translational Modification, Protein Degradation, Protein Synthesis	cleavage	Cleavage of protein fragment	0.00151			Ighg2a,ANPEP,DPP7,CTSH,SPCS1,IDE,CTSC,PARL,BCL2L1,CTSA,NLN,CPQ,CTSZ	13
Cellular Assembly and Organization, Cellular Function and Maintenance	organization	Organization of cytoplasm	0.00153		-1.003	GALNS,ITGAV,PPT1,SERPINF1,ANPEP,CNP,GLB1,AFG1L,PEX2,PEX12,ARSA,RPS6,EEF1A1,HNRNPK,CDK5RAP3,PEX1,NPHP4,PEX6,MGLL,CENPE,SPTAN1,KRT17,PEX7,FHIT,PITPNA,CELSR3,SPTBN1,VIM,GPX4,Krt10,Tpm1,PARL,KRT13,ZPR1,YBX1,RPL4,RTN3,CXADR,ARSB,PEX11A,COPB2,PEX19,VPS35,RAB5A,TXNRD1,GAA,SEPT2,RPS3,KRT18,CTNNA2,Krt2,IDE,KRT6B,RALA,EIF4E,SNAP29,HRAS,ARL1	58
Developmental Disorder, Hereditary Disorder, Metabolic Disease, Organismal Injury and Abnormalities	inborn error of metabolism	Autosomal recessive inborn error of metabolism	0.00156			GUSB,NEU1,GALNS,SERPINF1,AP3B1,AGXT,G6PC,GLB1,AK2,ARSA	10
Lipid Metabolism, Molecular Transport, Small Molecule Biochemistry	accumulation	Accumulation of galactosylceramide	0.0016			PSAP,ARSA	2
Small Molecule Biochemistry	biosynthesis	Biosynthesis of putrescine	0.0016			PAOX,ARG1	2
Cellular Assembly and Organization, Cellular Function and Maintenance	formation	Formation of peroxisome membrane	0.0016			PEX11A,PEX19	2
Cell Cycle, Skeletal and Muscular System Development and Function	G1 phase	G1 phase of vascular smooth muscle cells	0.0016			SKP2,ARG1	2
Carbohydrate Metabolism, Digestive System Development and Function, Hepatic System Development and Function	glycogenolysis	Glycogenolysis of liver	0.0016			SCD,PITPNA	2
Developmental Disorder, Hereditary Disorder, Metabolic Disease, Neurological Disease, Organismal Injury and Abnormalities	mucopolysaccharidosis type VI	Mucopolysaccharidosis type VI	0.0016			GUSB,ARSB	2
Small Molecule Biochemistry	production	Production of urea	0.0016			ASS1,ARG1	2
Cellular Assembly and Organization, Endocrine System Development and Function, Organ Morphology, Tissue Morphology	quantity	Quantity of zymogen granules	0.0016			KRT8,KRT18	2
Gene Expression, Protein Synthesis, RNA Trafficking	recruitment	Recruitment of mRNA	0.0016			EIF3A,EIF4E	2
Amino Acid Metabolism, Molecular Transport, Small Molecule Biochemistry	transport	Transport of L-arginine	0.0016			ARG1,SLC7A2	2
Cancer, Gastrointestinal Disease, Hepatic System Disease, Organismal Injury and Abnormalities	cholangiocarcinoma	Cholangiocarcinoma	0.0016			VIM,RPLP0,RPL9,RPL13A,RACK1,HPD,EIF4E,RPL4	8
Developmental Disorder, Hereditary Disorder, Metabolic Disease, Organismal Injury and Abnormalities	inborn error of amino acid metabolism	Inborn error of amino acid metabolism	0.0016			HGD,SARDH,ASS1,PCBD2,ARG1,HPD,FMO3,SUOX	8
Lipid Metabolism, Molecular Transport, Small Molecule Biochemistry	concentration	Concentration of arachidonic acid	0.00162		-0.914	ACOT2,ELOVL5,FADS2,MGLL	4
Cancer, Gastrointestinal Disease, Organismal Injury and Abnormalities	salivary duct carcinoma	Salivary duct carcinoma	0.00162			TRAM1,HRAS,AKAP1,BGN	4
Carbohydrate Metabolism	metabolism	Metabolism of monosaccharide	0.00168			G6PD,MAN2B2,CPT1A,G6PC,FUCA1,TALDO1,HRAS,GLB1	8
Dermatological Diseases and Conditions, Immunological Disease, Inflammatory Disease, Organismal Injury and Abnormalities	lichen planus	Lichen planus	0.00171			KRT17,EEF1A1,TRAM1,RPS17,DDB1,KRT5,FADS2	7
Lipid Metabolism, Molecular Transport, Small Molecule Biochemistry	transport	Transport of lipid	0.00175		-1.852	PITPNB,ITGAV,PLSCR1,GM2A,PITPNA,CPT1A,VNN1,STARD5,PCYT1A,SCD,PSAP,HRAS,FABP2	13
Cell Morphology, Digestive System Development and Function, Hematological System Development and Function, Hepatic System Development and Function, Inflammatory Response, Organ Morphology, Organismal Development	morphology	Morphology of Kupffer cells	0.00176			MANBA,GLA,CTBS	3
Digestive System Development and Function	morphology	Morphology of digestive system	0.00177			KRT8,FHIT,PPT1,PITPNA,G6PC,MANBA,GLA,SPTBN1,TKT,SKP2,PEX2,ARG1,PSAP,CTSA,YBX1,KRT5,FADS2,FABP2,CTBS,IGKC,G6PD,PEX11A,STARD10,BHMT,RPSA,KRT18,DPP7,KRT6B,MGLL,PPT2	30
Cell Morphology, Nervous System Development and Function	morphology	Morphology of central nervous system cells	0.00186			VIM,Pcmt1,PPT1,GM2A,VPS35,PEX2,PITPNA,MANBA,ABCD2,PSAP,ARSA	11
Cell Cycle	G1 phase	G1 phase of carcinoma cell lines	0.00195			CREG1,RPL7A,RPS6,SKP2,KRT13	5
Neurological Disease, Organismal Injury and Abnormalities, Psychological Disorders	leukodystrophy	Leukodystrophy	0.00195			PEX7,ABCD2,PSAP,SNAP29,ARSA	5
Molecular Transport	transport	Transport of molecule	0.00201	Decreased	-3.552	KRT8,FTL,ITGAV,PPT1,SERPINF1,G6PC,MIA3,CNP,SLC7A2,PCYT1A,TPT1,ARG1,NUTF2,FMO3,FABP2,SLC14A2,SRSF6,Ighg2a,KCNMA1,CPOX,PEX26,DDX25,ANO10,VNN1,PEX1,STARD5,PEX6,SLC25A4,CLCC1,STX8,MGLL,PEX7,SRSF3,PLSCR1,AP3B1,GM2A,CPT1A,PITPNA,SNAP23,Krt10,SCD,ATP13A1,SLC26A11,PSAP,ZPR1,CTSA,ARSB,SRSF1,PITPNB,RAB4A,AGXT,SEPT2,PLIN3,MCU,EIF4E,SNAP29,PTTG1IP,HRAS,MVP	59
Cancer, Organismal Injury and Abnormalities	cancer	Cancer of secretory structure	0.00202			PAOX,SNTB2,RPS24,MIA3,ANPEP,RPS5,RPL26,C8A,RPL8,PCYT1A,KRT79,PSMA1,AKAP1,REXO2,IGKC,KCNMA1,EEF1A1,RPS18,ANO10,ANKFY1,OSTC,LYZ,DPP7,CDK5RAP3,PLBD2,CWC22,BCLAF1,PLA2G15,NHLRC3,CENPE,PPT2,FUNDC2,SRSF3,SEC31B,NUFIP1,SEC61G,YKT6,CELSR3,AK2,DNASE2,ATP13A1,HAO2,RPS25,FRRS1,PITPNB,ENPP4,ACOT12,ELOVL5,GAA,FAM210B,SND1,CTSH,OS9,DDX1,TACO1,RALA,EIF4E,SARS2,MVP,FDXR,RPL7A,AGPAT3,TECR,G6PC,MANBA,RPL23,GYS2,SK…	266
RNA Post-Transcriptional Modification	aminoacylation	Aminoacylation of tRNA	0.00205			DARS2,GARS,FARS2,SARS2	4
Metabolic Disease	metabolism	Abnormal metabolism	0.00212		-0.781	SERPINF1,GM2A,PITPNA,CPT1A,PEX26,GLA,PEX1,PEX6,PCYT1A,SCD,PEX2,PLIN3,CTSC,PEX12,FUCA1,PSAP,HRAS,ARSA	18
Molecular Transport, Protein Trafficking	transport	Transport of protein	0.00226		-1.981	Ighg2a,PEX7,RAB4A,PPT1,AP3B1,MIA3,PEX26,SNAP23,PEX1,PEX6,ZPR1,NUTF2,STX8,CTSA,PTTG1IP	15
Lipid Metabolism, Small Molecule Biochemistry	metabolism	Metabolism of acylglycerol	0.00231		-1.667	THRSP,AGMO,SERPINF1,SCD,CPT1A,G6PC,BHMT,MGLL,FABP2	9
Cell Death and Survival, Connective Tissue Disorders, Hematological Disease, Organismal Injury and Abnormalities	hemolysis	Hemolysis	0.00236		0.152	Nmnat3,Ighg2b,G6PD,CPOX,BCL2L1,PRDX1,C8A	7
Neurological Disease	degeneration	Degeneration of nervous system	0.00237		-0.184	KCNMA1,PPT1,PITPNA,CNP,GLB1,MAVS,VIM,GPX4,FUCA1,ABCD2,PSAP,ZPR1,BCL2L1,PPT2,ARSA	15
Post-Translational Modification, Protein Degradation, Protein Synthesis	hydrolysis	Hydrolysis of protein fragment	0.0024			Ighg2a,DPP7,CTSH,SPCS1,IDE,CTSC,ANPEP,PARL,CTSA,NLN,CPQ,CTSZ	12
Carbohydrate Metabolism, Lipid Metabolism, Small Molecule Biochemistry	synthesis	Synthesis of phosphatidic acid	0.0025		-1.109	EEF1A1,ACP6,RAB4A,PCYT1A,PLSCR1,AGPAT3,RALA,RAB5A,STARD10,SYNJ2,ETNPPL	11
Developmental Disorder, Hereditary Disorder, Metabolic Disease, Organismal Injury and Abnormalities	mitochondrial DNA depletion syndrome	Mitochondrial DNA depletion syndrome	0.00256			SLC25A4,DGUOK,SCO2	3
Cellular Assembly and Organization	targeting	Targeting of vesicles	0.00256			SNAP23,YKT6,SNAP29	3
Developmental Disorder, Embryonic Development, Organismal Survival	organismal death	Death of embryo	0.0026	Increased	2.132	RPS19,TKT,SRSF3,SNAP23,GPX4,PCYT1A,TPT1,TXNRD1,RPSA	9
Organismal Development, Organismal Injury and Abnormalities	abnormal morphology	Abnormal morphology of abdomen	0.00261			Nmnat3,KRT8,FHIT,PPT1,PITPNA,G6PC,MANBA,CELSR3,PRDX1,GLA,DNASE2,SPTBN1,Pcmt1,SKP2,PEX2,ARG1,PSAP,CTSA,YBX1,KRT5,FADS2,ARSB,CTBS,IGKC,PEX11A,DDB1,BHMT,RPSA,KRT18,MAVS,ABCD2,FUCA1,PLA2G15,PPT2	34
Cancer, Hereditary Disorder, Organismal Injury and Abnormalities	hereditary cancer-predisposing syndrome	Hereditary cancer-predisposing syndrome	0.00263			RPS10,RPS26,RPL11,RPS24,RPS7,TXNRD1,RPL35A,RPL26,VIM,RPS19,RPL5,RPS17,SEC63,RPS28,BCL2L1,HRAS,RPL27	17
Cell Cycle	G2/M phase transition	Arrest in G2/M phase transition of lung cancer cell lines	0.00263			RPS6,RPL7A	2
Infectious Diseases	assembly	Assembly of virus	0.00263			HNRNPK,CNP	2
Cell Death and Survival	cell death	Cell death of cerebellar macroneurons	0.00263			SGPL1,BCL2L1	2
Amino Acid Metabolism, Post-Translational Modification, Small Molecule Biochemistry	conversion	Conversion of L-ornithine	0.00263			OAT,ARG1	2
Carbohydrate Metabolism, Small Molecule Biochemistry	metabolism	Metabolism of glucose-6-phosphate	0.00263			G6PD,G6PC	2
Cell Morphology, Cellular Assembly and Organization, DNA Replication, Recombination, and Repair	morphology	Morphology of nuclear bodies	0.00263			EIF4E,ZPR1	2
Neurological Disease, Organismal Injury and Abnormalities	neurodegeneration	Neurodegeneration of thalamus	0.00263			VIM,PPT1	2
Amino Acid Metabolism, Small Molecule Biochemistry	synthesis	Synthesis of glycine	0.00263			SARDH,AGXT	2
Developmental Disorder, Hereditary Disorder, Metabolic Disease, Neurological Disease, Organismal Injury and Abnormalities	Tay-Sachs disease	Tay-Sachs disease	0.00263			GM2A,PSAP	2
Infectious Diseases	replication	Replication of Hepatitis C virus	0.00269		-0.295	MAVS,RPS6,ISG15,DDB1,YBX1,MVP	6
Organismal Development	abnormal morphology	Abnormal morphology of body cavity	0.00298			Nmnat3,KRT8,ITGAV,PPT1,G6PC,MANBA,PRDX1,GLA,SKP2,PEX2,ARG1,KRT5,FADS2,AKAP1,IGKC,SLC25A4,CTSC,BCL2L1,PLA2G15,MGLL,PPT2,FHIT,CPT1A,PITPNA,CELSR3,SPTBN1,DNASE2,Pcmt1,Tpm1,PSAP,CTSA,YBX1,CXADR,CTBS,ARSB,FRRS1,G6PD,PEX11A,RAB4A,DDB1,GAA,BHMT,RPSA,KRT18,MAVS,KRT6B,CKMT2,FUCA1,SCO2,HRAS,BGN	51
Nervous System Development and Function, Neurological Disease, Organ Morphology, Organismal Development, Organismal Injury and Abnormalities	abnormal morphology	Abnormal morphology of cerebellum	0.00302			CTNNA2,GM2A,PEX2,PITPNA,MANBA,ABCD2,PSAP,GLB1,ARSA	9
Cancer, Organismal Injury and Abnormalities	malignant solid tumor	Malignant solid tumor	0.00303		-0.849	PAOX,SNTB2,RPS24,MIA3,ANPEP,RPS5,RPL26,C8A,RPS13,RPL8,PCYT1A,KRT79,PSMA1,RPL14,AKAP1,REXO2,IGKC,KCNMA1,EEF1A1,RPS18,ANO10,ANKFY1,OSTC,LYZ,DPP7,CDK5RAP3,PLBD2,CWC22,NUDT8,BCLAF1,PLA2G15,NHLRC3,CENPE,PPT2,TMEM97,FUNDC2,SRSF3,SEC31B,NUFIP1,SEC61G,YKT6,CELSR3,TMEM109,AK2,DNASE2,RPL5,SNAP23,ATP13A1,HAO2,RPS4Y1,SMPDL3A,RPS25,FRRS1,SRSF1,PITPNB,ORMDL2,ENPP4,ACOT12,OXNAD1,SET,ELOVL5,GAA,FAM210B,MAVS,SND1…	320
Organismal Development	morphology	Morphology of body cavity	0.00305			Nmnat3,KRT8,ITGAV,PPT1,G6PC,MANBA,PRDX1,GLA,SKP2,TXN2,PEX2,ARG1,KRT5,FADS2,FABP2,AKAP1,IGKC,STARD10,DPP7,SLC25A4,CTSC,BCL2L1,PLA2G15,MGLL,PPT2,FHIT,CPT1A,PITPNA,CELSR3,SPTBN1,DNASE2,TKT,Pcmt1,Tpm1,PSAP,CTSA,YBX1,CXADR,CTBS,ARSB,FRRS1,G6PD,PEX11A,RAB4A,DDB1,GAA,BHMT,RPSA,KRT18,MAVS,KRT6B,CKMT2,FUCA1,SCO2,HRAS,BGN	56
Protein Degradation, Protein Synthesis	catabolism	Catabolism of protein	0.00309		-1.342	ANPEP,MANBA,RPL23,RPL5,SPCS1,SKP2,PARL,CTSA,CPQ,SLC14A2,Ighg2a,UBE2L3,PEX19,RPL11,VPS35,DDB1,RPS7,DPP7,CTSH,IDE,OS9,PEX6,CTSC,BCL2L1,NLN,CTSZ	26
Cancer, Organismal Injury and Abnormalities	nonhematologic malignant neoplasm	Nonhematologic malignant neoplasm	0.00317		-0.018	PAOX,SNTB2,RPS24,MIA3,ANPEP,RPS5,RPL26,C8A,RPL8,PCYT1A,KRT79,PSMA1,RPL14,AKAP1,REXO2,KCNMA1,EEF1A1,RPS18,ANO10,ANKFY1,OSTC,LYZ,DPP7,CDK5RAP3,PLBD2,CWC22,NUDT8,BCLAF1,PLA2G15,NHLRC3,CENPE,PPT2,TMEM97,FUNDC2,SRSF3,SEC31B,NUFIP1,SEC61G,YKT6,CELSR3,TMEM109,AK2,DNASE2,RPL5,SNAP23,ATP13A1,HAO2,RPS4Y1,SMPDL3A,RPS25,FRRS1,SRSF1,PITPNB,ORMDL2,ENPP4,ACOT12,OXNAD1,SET,ELOVL5,GAA,FAM210B,MAVS,SND1,CTSH,THRSP…	314
Cancer, Organismal Injury and Abnormalities	solid tumor	Solid tumor	0.00321		-0.312	PAOX,SNTB2,RPS24,MIA3,ANPEP,RPS5,RPL26,C8A,RPS13,RPL8,PCYT1A,KRT79,PSMA1,RPL14,AKAP1,REXO2,IGKC,KCNMA1,EEF1A1,RPS18,ANO10,ANKFY1,OSTC,LYZ,DPP7,CDK5RAP3,PLBD2,CWC22,NUDT8,BCLAF1,PLA2G15,NHLRC3,CENPE,PPT2,TMEM97,FUNDC2,SRSF3,SEC31B,NUFIP1,SEC61G,YKT6,CELSR3,TMEM109,AK2,DNASE2,RPL5,SNAP23,ATP13A1,HAO2,RPS4Y1,SMPDL3A,RPS25,FRRS1,SRSF1,PITPNB,ORMDL2,ENPP4,ACOT12,OXNAD1,SET,ELOVL5,GAA,FAM210B,MAVS,SND1…	322
Cell Cycle	interphase	Arrest in interphase of tumor cell lines	0.00337			RPL7A,SRSF3,RPS6,FHIT,ITGAV,RPL11,PLSCR1,DDB1,RPL23,CDK5RAP3,RPL5,BCL2L1,KRT13,HRAS,SPTAN1	15
Gastrointestinal Disease, Hepatic System Disease, Metabolic Disease, Organismal Injury and Abnormalities	hepatic steatosis	Hepatic steatosis	0.00337		0.468	KRT8,PEX11A,PITPNA,CPT1A,G6PC,STARD10,ELOVL5,BHMT,DPP7,PCYT1A,SCD,PDK2,PEX2,MIGA2,PLA2G15	15
Cell Morphology	morphology	Morphology of leukocytes	0.0034			IGKC,PRG2,FTL,SGPL1,MANBA,GLA,MAVS,DNASE2,PARL,ABCD2,PSAP,BCL2L1,PLA2G15,CTBS,CTSZ,ARSA	16
Cancer, Organismal Injury and Abnormalities, Respiratory Disease	lung carcinoma	Advanced lung carcinoma	0.00341			KCNMA1,EEF1A1,RPL7,RPS6,FTL,TPT1,SEC61G,RPL27	8
Cell Cycle	interphase	Interphase of tumor cell lines	0.00343			CREG1,SRSF3,RPL7A,RPS6,FHIT,ITGAV,RACK1,PLSCR1,RPL11,DDB1,RPL23,RPL5,CDK5RAP3,SKP2,PSAP,KRT13,BCL2L1,HRAS,SPTAN1	19
Nucleic Acid Metabolism, Small Molecule Biochemistry	modification	Modification of NADPH	0.00356			FDXR,G6PD,TXNRD1	3
Energy Production, Lipid Metabolism, Small Molecule Biochemistry	beta-oxidation	Beta-oxidation of fatty acid	0.00359		-1.717	PEX7,SCD,PEX2,CPT1A,ABCD2,FABP2	6
Cell Morphology, Inflammatory Response	morphology	Morphology of phagocytes	0.00376			DNASE2,MANBA,ABCD2,PSAP,PLA2G15,GLA,CTBS,CTSZ,ARSA	9
Amino Acid Metabolism	abnormal quantity	Abnormal quantity of amino acids	0.00382			OAT,ASS1,ARG1,BHMT	4
Metabolic Disease	oxidative phosphorylation deficiency	Oxidative phosphorylation deficiency	0.00382			FARS2,TXN2,SCO2,EARS2	4
Lipid Metabolism, Molecular Transport, Small Molecule Biochemistry	accumulation	Accumulation of lactosylceramide	0.00391			PSAP,GLB1	2
Energy Production, Lipid Metabolism, Small Molecule Biochemistry	beta-oxidation	Beta-oxidation of lignoceric acid	0.00391			PEX2,ABCD2	2
Energy Production, Lipid Metabolism, Small Molecule Biochemistry	beta-oxidation	Beta-oxidation of oleic acid	0.00391			CPT1A,FABP2	2
Small Molecule Biochemistry	catabolism	Catabolism of choline	0.00391			SARDH,BHMT	2
Cellular Development, Embryonic Development, Organismal Development, Tissue Development	differentiation	Differentiation of primitive endoderm	0.00391			SGPL1,HRAS	2
Gastrointestinal Disease, Hematological Disease, Hepatic System Disease, Metabolic Disease, Organismal Injury and Abnormalities	hepatic porphyria	Hepatic porphyria	0.00391			KRT8,CPOX	2
Lipid Metabolism, Small Molecule Biochemistry	hydrolysis	Hydrolysis of 2-arachidonoylglycerol	0.00391			PPT1,MGLL	2
Endocrine System Disorders, Hematological Disease, Metabolic Disease	postprandial hyperglycemia	Postprandial hyperglycemia	0.00391			AMY2A,GAA	2
Amino Acid Metabolism, Small Molecule Biochemistry	synthesis	Synthesis of L-methionine	0.00391			MTRR,BHMT	2
Molecular Transport, Protein Trafficking	transport	Transport of green fluorescent protein	0.00391			PEX7,NUTF2	2
Cell Cycle	interphase	Interphase of carcinoma cell lines	0.00401			CREG1,RPL7A,RPS6,FHIT,SKP2,KRT13	6
Neurological Disease, Organismal Injury and Abnormalities, Psychological Disorders, Skeletal and Muscular Disorders	Parkinson disease	Parkinson's disease	0.00402			EEF1A1,RPL17,FTL,RPL13A,VPS35,RPL13,CNP,VIM,TPT1,RPL3,PARL,BCL2L1,RPL31	13
Hereditary Disorder, Neurological Disease, Organismal Injury and Abnormalities	hereditary neuropathy	Hereditary neuropathy	0.00412			KCNMA1,FDXR,FTL,VPS35,GARS,AMY2A,FARS2,PARL,PSAP,BCL2L1,INF2,DCAF8,BGN	13
Cell Morphology, Cellular Assembly and Organization	morphology	Morphology of lysosome	0.00419			AP3B1,FUCA1,CTSA,GAA	4
Carbohydrate Metabolism, Lipid Metabolism, Molecular Transport, Small Molecule Biochemistry	concentration	Concentration of phosphatidic acid	0.00447		-1.318	EEF1A1,THRSP,ACP6,AGMO,PCYT1A,SCD,FMO3,BHMT,HRAS	9
Cancer, Organismal Injury and Abnormalities	extracranial solid tumor	Extracranial solid tumor	0.00456		0.144	PAOX,SNTB2,RPS24,MIA3,ANPEP,RPS5,RPL26,C8A,RPL8,PCYT1A,KRT79,PSMA1,RPL14,AKAP1,REXO2,IGKC,KCNMA1,EEF1A1,RPS18,ANO10,ANKFY1,OSTC,LYZ,DPP7,CDK5RAP3,PLBD2,CWC22,NUDT8,BCLAF1,PLA2G15,NHLRC3,CENPE,PPT2,TMEM97,FUNDC2,SRSF3,SEC31B,NUFIP1,SEC61G,YKT6,CELSR3,TMEM109,AK2,DNASE2,RPL5,SNAP23,ATP13A1,HAO2,RPS4Y1,SMPDL3A,RPS25,FRRS1,SRSF1,PITPNB,ORMDL2,ENPP4,ACOT12,OXNAD1,SET,ELOVL5,GAA,FAM210B,MAVS,SND1,CTSH,…	319
Dermatological Diseases and Conditions, Organismal Injury and Abnormalities, Skeletal and Muscular Disorders	nail disease	Nail disease	0.00458			KRT17,PEX1,PEX6,KRT6B	4
Cellular Assembly and Organization, Cellular Function and Maintenance	organization	Organization of lysosome	0.00458			PPT1,VPS35,GAA,ARSB	4
Cancer, Organismal Injury and Abnormalities	acinar-cell carcinoma	Low grade acinar-cell carcinoma	0.00477			TRAM1,AKAP1,BGN	3
Lipid Metabolism, Small Molecule Biochemistry	metabolism	Metabolism of ceramide	0.00477			ORMDL2,SGPL1,PLA2G15	3
Cellular Assembly and Organization	quantity	Quantity of filaments	0.00485		-0.297	VIM,Ighg2b,IDE,RACK1,Tpm1,HRAS,SPTAN1,KRT18	8
Lipid Metabolism, Molecular Transport, Small Molecule Biochemistry	concentration	Concentration of fatty acid	0.00488		0.303	PEX11A,CPT1A,G6PC,STARD10,ELOVL5,THRSP,SCD,PEX2,ABCD2,ACOT2,BCL2L1,FMO3,FADS2,MGLL	14
Hereditary Disorder, Neurological Disease, Organismal Injury and Abnormalities	hereditary myelin disorder	Hereditary myelin disorder	0.005			PEX7,ABCD2,PSAP,ARSA	4
Carbohydrate Metabolism	phosphorylation	Phosphorylation of carbohydrate	0.005			PITPNA,RAB5A,G6PC,SYNJ2	4
Cell Cycle	G1 phase	Arrest in G1 phase	0.00511			RPL7A,SRSF3,RPS6,ITGAV,RPL11,PLSCR1,RPL23,CDK5RAP3,RPL5,SKP2,ARG1,KRT13,HRAS,SPTAN1	14
Cell Death and Survival	cell viability	Cell viability of colorectal cancer cell lines	0.00512	Decreased	-2.335	FDXR,SRSF3,RPL24,SNRPD1,EIF4E,STX8,RPL35A,BCL2L1,TXNDC16	9
Digestive System Development and Function, Gastrointestinal Disease, Hepatic System Development and Function, Hepatic System Disease, Organ Morphology, Organismal Development, Organismal Injury and Abnormalities	hepatomegaly	Hepatomegaly	0.0052			G6PC,ARG1,CTSA,FADS2,PPT2,KRT18	6
Cancer, Organismal Injury and Abnormalities	precancerous condition	Precancerous condition	0.00522			LYZ,TKT,G6PD,DDB1,CTSC,ANPEP,BHMT	7
Carbohydrate Metabolism	cleavage	Cleavage of carbohydrate	0.00523		-0.355	LYZ,PITPNB,PITPNA,G6PC,GLB1,MGLL,GLA,CHIA	8
Lipid Metabolism, Molecular Transport, Small Molecule Biochemistry	accumulation	Accumulation of glucosylceramide	0.00541			PSAP,GLB1	2
Carbohydrate Metabolism, Lipid Metabolism, Molecular Transport, Small Molecule Biochemistry	concentration	Concentration of colfosceril palmitate	0.00541			THRSP,SCD	2
Endocrine System Disorders, Organismal Injury and Abnormalities, Reproductive System Disease	disorganization	Disorganization of gonad	0.00541			ERMP1,GPX4	2
Cellular Function and Maintenance, Molecular Transport, Protein Trafficking	exocytosis	Exocytosis of protein	0.00541			SNAP23,RALA	2
Amino Acid Metabolism, Small Molecule Biochemistry	metabolism	Metabolism of L-aspartic acid	0.00541			DDO,ASS1	2
Inflammatory Disease, Inflammatory Response, Neurological Disease, Organismal Injury and Abnormalities	neuroinflammation	Neuroinflammation of brain	0.00541			VIM,PPT1	2
Energy Production, Lipid Metabolism, Nucleic Acid Metabolism, Small Molecule Biochemistry	oxidation	Oxidation of acyl-coenzyme A	0.00541			IDE,SCD	2
Cell Cycle, Humoral Immune Response	S phase	S phase of B lymphocytes	0.00541			Igkv1-117,BCL2L1	2
Cell Morphology, Cellular Assembly and Organization	size	Size of early endosomes	0.00541			RAB4A,RAB5A	2
Cancer, Organismal Injury and Abnormalities	tumorigenesis	Tumorigenesis of intestinal cell lines	0.00541			PCYT1A,HRAS	2
Infectious Diseases	infection	Infection of cervical cancer cell lines	0.00544	Decreased	-2.768	DDO,HNRNPF,EIF3A,HNRNPK,COPB2,TECR,GM2A,TOMM70,SEC61G,RAB5A,SPTBN1,TPT1,COPA,COPB1,BCLAF1,ETF1,CTSZ,SPTAN1	18
Cell Cycle	G1 phase	Arrest in G1 phase of bone cancer cell lines	0.00544			RPL5,CDK5RAP3,RPL11,RPL23	4
Cell Cycle	G1 phase	Arrest in G1 phase of sarcoma cell lines	0.00544			CDK5RAP3,RPL5,RPL11,RPL23	4
Carbohydrate Metabolism	metabolism	Metabolism of glycogen	0.00544			PITPNA,G6PC,GAA,GYS2	4
Amino Acid Metabolism, Small Molecule Biochemistry	metabolism	Metabolism of basic amino acid	0.00546			OAT,AMDHD1,ARG1	3
Lipid Metabolism, Molecular Transport, Small Molecule Biochemistry	quantity	Quantity of glycosylceramide	0.00546			PSAP,GLB1,GLA	3
Hair and Skin Development and Function	tensile strength	Tensile strength of skin	0.00546			KRT1,Krt10,BGN	3
Neurological Disease, Organismal Injury and Abnormalities	astrocytosis	Astrocytosis	0.00547		-0.861	IDE,PPT1,ABCD2,PSAP,FUCA1,ARSA	6
Cardiovascular Disease, Cell Death and Survival, Connective Tissue Disorders, Hematological Disease, Organismal Injury and Abnormalities	hemolytic anemia	Hemolytic anemia	0.00547		0.152	Nmnat3,Ighg2b,G6PD,CPOX,BCL2L1,PRDX1	6
Cell Morphology, Digestive System Development and Function, Organ Morphology, Organismal Development	morphology	Morphology of pancreatic cells	0.00547			KRT8,SKP2,PITPNA,PPT2,RPSA,KRT18	6
Carbohydrate Metabolism	metabolism	Metabolism of polysaccharide	0.0055		0.391	GALNS,PITPNA,G6PC,GAA,GLB1,GYS2,GUSB,PCYT1A,HRAS,CTBS,CHIA,PRELP,BGN	13
Digestive System Development and Function, Gastrointestinal Disease	abnormal morphology	Abnormal morphology of digestive system	0.00553			IGKC,KRT8,PEX11A,FHIT,PPT1,PITPNA,G6PC,MANBA,BHMT,GLA,RPSA,KRT18,SPTBN1,KRT6B,SKP2,PEX2,ARG1,PSAP,CTSA,YBX1,KRT5,FADS2,CTBS,PPT2	24
Digestive System Development and Function, Hepatic System Development and Function, Organ Morphology, Organismal Development	mass	Mass of liver	0.00563			TKT,DPP7,G6PC,STARD10,PSAP,BHMT,FADS2,FABP2	8
Cellular Assembly and Organization, Cellular Compromise	formation	Formation of cellular inclusion bodies	0.00604			KRT8,FTL,ARG1,PSAP,BCL2L1,KRT18	6
Dermatological Diseases and Conditions, Organismal Injury and Abnormalities	keratosis	Keratosis	0.00605			TKT,G6PD,KRT1,Krt10,DDB1,CTSC,HRAS,KRT5	8
Cellular Compromise, DNA Replication, Recombination, and Repair	degradation	Degradation of chromosomes	0.0062			FHIT,YBX1,HRAS	3
Developmental Disorder, Hereditary Disorder, Metabolic Disease, Organismal Injury and Abnormalities	lipofuscinosis	Lipofuscinosis	0.0062			PPT1,FUCA1,PPT2	3
Carbohydrate Metabolism	localization	Localization of carbohydrate	0.0062			EEF1A1,SGPL1,G6PC	3
Neurological Disease, Organismal Injury and Abnormalities	neurodegeneration	Neurodegeneration of forebrain	0.0062			VIM,PPT1,BCL2L1	3
Organismal Injury and Abnormalities	visceromegaly	Visceromegaly	0.00648			Nmnat3,KRT8,ITGAV,CPT1A,G6PC,PRDX1,GLA,DNASE2,SPTBN1,SKP2,Tpm1,ARG1,CTSA,FADS2,AKAP1,FRRS1,RAB4A,GAA,KRT18,MAVS,CKMT2,SLC25A4,CTSC,SCO2,BCL2L1,HRAS,MGLL,PPT2,BGN	29
Cancer, Gastrointestinal Disease, Hepatic System Disease, Organismal Injury and Abnormalities	liver tumor	Liver tumor	0.0065		0.373	PAOX,KRT8,FTL,RPS24,MIA3,ANPEP,GLB1,RPL26,C8A,HIST2H2AC,GARS,TPT1,SARDH,KRT79,CYP2S1,PSMA1,REXO2,KCNMA1,EEF1A1,AMDHD1,PEX26,ANO10,ANKFY1,GUF1,PYROXD2,CDK5RAP3,PLBD2,CWC22,NUDT8,COPB1,CTSC,BCLAF1,BCL2L1,CENPE,PPT2,CTSZ,SRSF3,NUFIP1,ACSS2,HDLBP,CRELD2,AK2,RPS20,RPL6,SPTBN1,VIM,DNASE2,DARS2,RPL5,ISG15,ATP13A1,SLC26A11,RPS4Y1,SEC63,YBX1,INF2,RPL4,RTN3,SRSF1,PITPNB,NEU1,RACK1,ENPP4,TRIM41,TXNRD1,SET,E…	150
Immunological Disease	systemic autoimmune syndrome	Systemic autoimmune syndrome	0.00651			PLSCR1,CPT1A,RPS24,PRDX1,AK2,SLC7A2,VIM,DNASE2,RPS13,Ighg2b,RPS19,GUSB,SCD,ISG15,ARG1,RPL31,CTSA,RPL18A,ARSA,IGKC,SRSF1,UBE2L3,RPL11,RPS18,RPLP2,DDB1,RAB5A,GAA,COL6A2,BHMT,DDX25,RPSA,RPS3,SND1,LYZ,RPS16,CTSH,IDE,COPA,CTSC,TALDO1,MOGS,BCL2L1,MGLL,PPT2,BGN	46
Cancer, Organismal Injury and Abnormalities	malignant tumor	Refractory malignant tumor	0.00665			LYZ,EEF1A1,RPL11,RPS24,TXNRD1,RPL3,EIF4E,RPS25,RPS12,RPL6	10
Lipid Metabolism, Molecular Transport, Small Molecule Biochemistry	quantity	Quantity of steroid	0.00678		-1.263	KCNMA1,NEU1,SGPL1,PITPNA,G6PC,STARD10,BHMT,DDX25,GLA,VNN1,Pcmt1,PCYT1A,SCD,PEX2,FUCA1,PSAP,PLA2G15,FMO3,FABP2,MGLL	20
Molecular Transport, Nucleic Acid Metabolism, Small Molecule Biochemistry	exchange	Exchange of nucleotide	0.007			EEF1A1,TPT1,SLC25A4	3
Carbohydrate Metabolism	flux	Flux of carbohydrate	0.007			PCYT1A,CPT1A,MVP	3
Gastrointestinal Disease, Hepatic System Disease, Metabolic Disease, Organismal Injury and Abnormalities	microvesicular hepatic steatosis	Microvesicular hepatic steatosis	0.007			PDK2,CPT1A,G6PC	3
Nervous System Development and Function, Neurological Disease, Organ Morphology, Organismal Development, Organismal Injury and Abnormalities	abnormal morphology	Abnormal morphology of amygdala	0.00714			GM2A,MANBA	2
Cell Morphology, Cellular Assembly and Organization, Dermatological Diseases and Conditions, Hair and Skin Development and Function, Organ Morphology, Organismal Injury and Abnormalities	abnormal morphology	Abnormal morphology of cornified envelope	0.00714			Krt10,KRT1	2
Connective Tissue Disorders, Organismal Injury and Abnormalities	abnormal morphology	Abnormal morphology of inguinal fat pad	0.00714			PITPNA,PLIN3	2
Lipid Metabolism, Molecular Transport, Small Molecule Biochemistry	accumulation	Accumulation of ganglioside GM2	0.00714			GM2A,GLB1	2
Cell Cycle	G2/M phase transition	Arrest in G2/M phase transition of carcinoma cell lines	0.00714			RPS6,RPL7A	2
Neurological Disease	formation	Formation of axon spheroid	0.00714			FUCA1,PSAP	2
Developmental Disorder, Gastrointestinal Disease, Hepatic System Disease, Hereditary Disorder, Metabolic Disease, Organismal Injury and Abnormalities	glycogen storage disease, hepatic form	Glycogen storage disease, hepatic form	0.00714			G6PC,GYS2	2
Lipid Metabolism, Nucleic Acid Metabolism, Small Molecule Biochemistry	modification	Modification of palmitoyl-coenzyme A	0.00714			SCD,TECR	2
Amino Acid Metabolism, Molecular Transport, Nucleic Acid Metabolism, Small Molecule Biochemistry	quantity	Quantity of S-adenosylmethionine	0.00714			Pcmt1,BHMT	2
Cellular Assembly and Organization	quantity	Quantity of ribosome	0.00714			RPS6,RPL4	2
[truncated: 153 more rows]

## Sheet: Tox Functions
Categories	Functions	Diseases or Functions Annotation	p-Value	Predicted Activation State	Activation z-score	Molecules	# Molecules
[truncated: 123 more rows]

[truncated: 2 more sheets: Regulator Effects, Analysis Ready Molecules]
